# Supplementary material for: Shear Thickening Fluids in Cork Agglomerates: An Exploration of Advantages and Drawbacks
Source: Preprints.org preprint supplement (doi:10.20944/preprints202304.0004.v1), 2023-04-03
Supplement: Supplementary file 1 [file CG_x_0.xlsx]

## Sheet: data
Time - Force (Bridge) - Force	Amplitude - Force (Bridge) - Force	data
0	37.32	-37.32		-1
4e-05	57.72	-57.72
8e-05	80.55	-80.55
0.00012	85.12	-85.12
0.00016	77.4	-77.4
0.0002	47.11	-47.11
0.00024	50.96	-50.96
0.00028	47.66	-47.66
0.00032	73.36	-73.36
0.00036	83.79	-83.79
0.0004	95.03	-95.03
0.00044	51.74	-51.74
0.00048	65.29	-65.29
0.00052	73.99	-73.99
0.00056	74.95	-74.95
0.0006	64.25	-64.25
0.00064	47.58	-47.58
0.00068	47.49	-47.49
0.00072	74.89	-74.89
0.00076	81.3	-81.3
0.0008	78.24	-78.24
0.00084	53.44	-53.44
0.00088	60.52	-60.52
0.00092	26.62	-26.62
0.00096	55.76	-55.76
0.001	87.17	-87.17
0.00104	67.92	-67.92
0.00108	79.43	-79.43
0.00112	63.76	-63.76
0.00116	78.07	-78.07
0.0012	50.06	-50.06
0.00124	32.72	-32.72
0.00128	58.65	-58.65
0.00132	70.12	-70.12
0.00136	73.3	-73.3
0.0014	66.33	-66.33
0.00144	73.47	-73.47
0.00148	60.15	-60.15
0.00152	60.76	-60.76
0.00156	42.09	-42.09
0.0016	54.83	-54.83
0.00164	47.11	-47.11
0.00168	46.04	-46.04
0.00172	55.81	-55.81
0.00176	58.93	-58.93
0.0018	54.34	-54.34
0.00184	72.58	-72.58
0.00188	75.26	-75.26
0.00192	53.24	-53.24
0.00196	43.82	-43.82
0.002	46.94	-46.94
0.00204	44.69	-44.69
0.00208	55.73	-55.73
0.00212	39.17	-39.17
0.00216	45.15	-45.15
0.0022	31.68	-31.68
0.00224	20.09	-20.09
0.00228	51.68	-51.68
0.00232	45.03	-45.03
0.00236	44.54	-44.54
0.0024	38.76	-38.76
0.00244	26.57	-26.57
0.00248	27.14	-27.14
0.00252	29.05	-29.05
0.00256	49.34	-49.34
0.0026	57.52	-57.52
0.00264	31.33	-31.33
0.00268	40.55	-40.55
0.00272	39.11	-39.11
0.00276	51.91	-51.91
0.0028	54.14	-54.14
0.00284	44.83	-44.83
0.00288	54.02	-54.02
0.00292	10.99	-10.99
0.00296	38.47	-38.47
0.003	45.09	-45.09
0.00304	35.84	-35.84
0.00308	22.98	-22.98
0.00312	47.63	-47.63
0.00316	45.84	-45.84
0.0032	40.58	-40.58
0.00324	29.17	-29.17
0.00328	40.58	-40.58
0.00332	62.49	-62.49
0.00336	40.5	-40.5
0.0034	42.11	-42.11
0.00344	40.87	-40.87
0.00348	51.48	-51.48
0.00352	23.01	-23.01
0.00356	41.91	-41.91
0.0036	28.76	-28.76
0.00364	27.46	-27.46
0.00368	34.14	-34.14
0.00372	12.69	-12.69
0.00376	43.44	-43.44
0.0038	32.81	-32.81
0.00384	37.49	-37.49
0.00388	12.26	-12.26
0.00392	11.16	-11.16
0.00396	50.78	-50.78
0.004	26.1	-26.1
0.00404	36.62	-36.62
0.00408	21.36	-21.36
0.00412	27.11	-27.11
0.00416	34.22	-34.22
0.0042	2.23	-2.23
0.00424	29.31	-29.31
0.00428	31.39	-31.39
0.00432	21.74	-21.74
0.00436	43.96	-43.96
0.0044	-14.79	14.79
0.00444	39.4	-39.4
0.00448	17.37	-17.37
0.00452	41.54	-41.54
0.00456	24.51	-24.51
0.0046	4.629	-4.629
0.00464	29.92	-29.92
0.00468	8.878	-8.878
0.00472	20.76	-20.76
0.00476	27.95	-27.95
0.0048	18.7	-18.7
0.00484	30.41	-30.41
0.00488	22.06	-22.06
0.00492	22.32	-22.32
0.00496	31.48	-31.48
0.005	37.75	-37.75
0.00504	18.44	-18.44
0.00508	24.72	-24.72
0.00512	18.65	-18.65
0.00516	-13.87	13.87
0.0052	23.56	-23.56
0.00524	38.7	-38.7
0.00528	41.3	-41.3
0.00532	35.21	-35.21
0.00536	20.61	-20.61
0.0054	8.618	-8.618
0.00544	39.98	-39.98
0.00548	20.15	-20.15
0.00552	18.07	-18.07
0.00556	19.14	-19.14
0.0056	14.17	-14.17
0.00564	21.16	-21.16
0.00568	27.2	-27.2
0.00572	22.58	-22.58
0.00576	27.46	-27.46
0.0058	36.91	-36.91
0.00584	10.64	-10.64
0.00588	10.21	-10.21
0.00592	27.84	-27.84
0.00596	28.73	-28.73
0.006	34.77	-34.77
0.00604	22.2	-22.2
0.00608	28.15	-28.15
0.00612	17.52	-17.52
0.00616	9.831	-9.831
0.0062	24.63	-24.63
0.00624	5.178	-5.178
0.00628	41.91	-41.91
0.00632	13.07	-13.07
0.00636	25.76	-25.76
0.0064	16.77	-16.77
0.00644	13.01	-13.01
0.00648	26.1	-26.1
0.00652	8.329	-8.329
0.00656	-1.469	1.469
0.0066	20.26	-20.26
0.00664	19.95	-19.95
0.00668	6.219	-6.219
0.00672	17.2	-17.2
0.00676	27.63	-27.63
0.0068	25.32	-25.32
0.00684	7.779	-7.779
0.00688	9.86	-9.86
0.00692	23.68	-23.68
0.00696	29.74	-29.74
0.007	28.56	-28.56
0.00704	27.58	-27.58
0.00708	11.91	-11.91
0.00712	23.47	-23.47
0.00716	37.14	-37.14
0.0072	22.35	-22.35
0.00724	10	-10
0.00728	31.77	-31.77
0.00732	31.25	-31.25
0.00736	40.15	-40.15
0.0074	29.25	-29.25
0.00744	15	-15
0.00748	22.58	-22.58
0.00752	14.2	-14.2
0.00756	31.1	-31.1
0.0076	24.6	-24.6
0.00764	31.16	-31.16
0.00768	36.22	-36.22
0.00772	24.48	-24.48
0.00776	3.676	-3.676
0.0078	25.9	-25.9
0.00784	22.95	-22.95
0.00788	27.75	-27.75
0.00792	16.02	-16.02
0.00796	23.47	-23.47
0.008	19.25	-19.25
0.00804	28.39	-28.39
0.00808	19.57	-19.57
0.00812	27.52	-27.52
0.00816	41.65	-41.65
0.0082	32.95	-32.95
0.00824	39.98	-39.98
0.00828	29.74	-29.74
0.00832	29.17	-29.17
0.00836	12.14	-12.14
0.0084	35.26	-35.26
0.00844	28.18	-28.18
0.00848	25.76	-25.76
0.00852	25.78	-25.78
0.00856	46.71	-46.71
0.0086	26.68	-26.68
0.00864	25.18	-25.18
0.00868	554.2m	-0.5542
0.00872	612m	-0.612
0.00876	12.26	-12.26
0.0088	18.39	-18.39
0.00884	8.329	-8.329
0.00888	-24.68	24.68
0.00892	24.05	-24.05
0.00896	-6.844	6.844
0.009	-29.42	29.42
0.00904	-15.37	15.37
0.00908	6.855	-6.855
0.00912	29.17	-29.17
0.00916	-17.08	17.08
0.0092	-29.65	29.65
0.00924	-46.76	46.76
0.00928	4.687	-4.687
0.00932	25.78	-25.78
0.00936	-15.89	15.89
0.0094	-1.238	1.238
0.00944	-38.35	38.35
0.00948	12.4	-12.4
0.00952	-18.64	18.64
0.00956	-21.27	21.27
0.0096	-8.347	8.347
0.00964	-9.041	9.041
0.00968	11.42	-11.42
0.00972	-52.73m	0.05273
0.00976	4.918	-4.918
0.0098	25.18	-25.18
0.00984	14.63	-14.63
0.00988	1.941	-1.941
0.00992	-10.83	10.83
0.00996	25.76	-25.76
0.01	43.04	-43.04
0.01004	9.745	-9.745
0.01008	13.33	-13.33
0.01012	8.647	-8.647
0.01016	5.785	-5.785
0.0102	4.543	-4.543
0.01024	16.25	-16.25
0.01028	10.18	-10.18
0.01032	-5.631	5.631
0.01036	843.2m	-0.8432
0.0104	1.566	-1.566
0.01044	-1.642	1.642
0.01048	12.69	-12.69
0.01052	9.658	-9.658
0.01056	-1.874	1.874
0.0106	-9.214	9.214
0.01064	52.46	-52.46
0.01068	30.09	-30.09
0.01072	16.48	-16.48
0.01076	-9.243	9.243
0.0108	8.271	-8.271
0.01084	-515.1m	0.5151
0.01088	13.3	-13.3
0.01092	31.77	-31.77
0.01096	9.167	-9.167
0.011	19.31	-19.31
0.01104	24.43	-24.43
0.01108	12.32	-12.32
0.01112	27.61	-27.61
0.01116	8.271	-8.271
0.0112	12.2	-12.2
0.01124	-10.34	10.34
0.01128	-16.18	16.18
0.01132	-5.053	5.053
0.01136	20.26	-20.26
0.0114	21.57	-21.57
0.01144	18.59	-18.59
0.01148	11.83	-11.83
0.01152	11.97	-11.97
0.01156	1.45	-1.45
0.0116	35.06	-35.06
0.01164	15.24	-15.24
0.01168	32.26	-32.26
0.01172	21.8	-21.8
0.01176	-5.515	5.515
0.0118	22.52	-22.52
0.01184	12.23	-12.23
0.01188	-1.122	1.122
0.01192	15.84	-15.84
0.01196	2.086	-2.086
0.012	34.63	-34.63
0.01204	16.07	-16.07
0.01208	31.59	-31.59
0.01212	26.83	-26.83
0.01216	40.64	-40.64
0.0122	28.36	-28.36
0.01224	13.42	-13.42
0.01228	20.7	-20.7
0.01232	8.675	-8.675
0.01236	48.47	-48.47
0.0124	16.51	-16.51
0.01244	54.22	-54.22
0.01248	18.82	-18.82
0.01252	32.66	-32.66
0.01256	29.4	-29.4
0.0126	30.18	-30.18
0.01264	18.59	-18.59
0.01268	18.73	-18.73
0.01272	51.97	-51.97
0.01276	12.37	-12.37
0.0128	28.01	-28.01
0.01284	20.41	-20.41
0.01288	36.91	-36.91
0.01292	22.75	-22.75
0.01296	25.29	-25.29
0.013	24.2	-24.2
0.01304	32.63	-32.63
0.01308	26.05	-26.05
0.01312	25.64	-25.64
0.01316	23.1	-23.1
0.0132	35.84	-35.84
0.01324	20.99	-20.99
0.01328	30.81	-30.81
0.01332	33.5	-33.5
0.01336	34.54	-34.54
0.0134	21.45	-21.45
0.01344	38.62	-38.62
0.01348	35.12	-35.12
0.01352	24.08	-24.08
0.01356	26.71	-26.71
0.0136	33.76	-33.76
0.01364	25.5	-25.5
0.01368	28.88	-28.88
0.01372	24.05	-24.05
0.01376	16.85	-16.85
0.0138	38.73	-38.73
0.01384	32.95	-32.95
0.01388	37.29	-37.29
0.01392	36.28	-36.28
0.01396	40.15	-40.15
0.014	23.18	-23.18
0.01404	28.68	-28.68
0.01408	49.98	-49.98
0.01412	19.74	-19.74
0.01416	7.722	-7.722
0.0142	27.17	-27.17
0.01424	45.58	-45.58
0.01428	25.35	-25.35
0.01432	43.01	-43.01
0.01436	38.13	-38.13
0.0144	25.41	-25.41
0.01444	54.74	-54.74
0.01448	40.73	-40.73
0.01452	27.46	-27.46
0.01456	31.94	-31.94
0.0146	50.41	-50.41
0.01464	41.74	-41.74
0.01468	5.294	-5.294
0.01472	35.12	-35.12
0.01476	28.94	-28.94
0.0148	39.46	-39.46
0.01484	51.33	-51.33
0.01488	29.43	-29.43
0.01492	28.27	-28.27
0.01496	30.87	-30.87
0.015	40.7	-40.7
0.01504	25.32	-25.32
0.01508	33.56	-33.56
0.01512	51.28	-51.28
0.01516	32.66	-32.66
0.0152	27.26	-27.26
0.01524	28.62	-28.62
0.01528	36.16	-36.16
0.01532	21.54	-21.54
0.01536	46.28	-46.28
0.0154	51.13	-51.13
0.01544	58.47	-58.47
0.01548	4.889	-4.889
0.01552	32.43	-32.43
0.01556	26.13	-26.13
0.0156	25.09	-25.09
0.01564	38.99	-38.99
0.01568	27.52	-27.52
0.01572	42.11	-42.11
0.01576	39.89	-39.89
0.0158	30.24	-30.24
0.01584	26.33	-26.33
0.01588	32.03	-32.03
0.01592	26.94	-26.94
0.01596	18.42	-18.42
0.016	45.21	-45.21
0.01604	33.04	-33.04
0.01608	34.51	-34.51
0.01612	25.35	-25.35
0.01616	3.849	-3.849
0.0162	27.87	-27.87
0.01624	40.73	-40.73
0.01628	28.15	-28.15
0.01632	36.71	-36.71
0.01636	38.91	-38.91
0.0164	37.95	-37.95
0.01644	47.23	-47.23
0.01648	35.87	-35.87
0.01652	35.35	-35.35
0.01656	29.69	-29.69
0.0166	26.94	-26.94
0.01664	34.86	-34.86
0.01668	34.4	-34.4
0.01672	34.08	-34.08
0.01676	46.22	-46.22
0.0168	26.45	-26.45
0.01684	26.57	-26.57
0.01688	40.78	-40.78
0.01692	25.78	-25.78
0.01696	30.64	-30.64
0.017	16.05	-16.05
0.01704	28.18	-28.18
0.01708	23.27	-23.27
0.01712	42	-42
0.01716	28.33	-28.33
0.0172	40.32	-40.32
0.01724	48.88	-48.88
0.01728	38.79	-38.79
0.01732	20.55	-20.55
0.01736	30.44	-30.44
0.0174	26.68	-26.68
0.01744	44.25	-44.25
0.01748	35.15	-35.15
0.01752	30.38	-30.38
0.01756	3.155	-3.155
0.0176	24.2	-24.2
0.01764	28.01	-28.01
0.01768	41.71	-41.71
0.01772	29.69	-29.69
0.01776	27.11	-27.11
0.0178	33.91	-33.91
0.01784	19.77	-19.77
0.01788	29.08	-29.08
0.01792	23.91	-23.91
0.01796	30.61	-30.61
0.018	6.652	-6.652
0.01804	38.13	-38.13
0.01808	29.77	-29.77
0.01812	35.99	-35.99
0.01816	33.85	-33.85
0.0182	49.17	-49.17
0.01824	37.14	-37.14
0.01828	31.85	-31.85
0.01832	27.98	-27.98
0.01836	32.43	-32.43
0.0184	24.54	-24.54
0.01844	49.34	-49.34
0.01848	25	-25
0.01852	39.34	-39.34
0.01856	27.81	-27.81
0.0186	31.74	-31.74
0.01864	41.56	-41.56
0.01868	47.95	-47.95
0.01872	62.17	-62.17
0.01876	87.92	-87.92
0.0188	113.3	-113.3
0.01884	33.96	-33.96
0.01888	59.45	-59.45
0.01892	98.15	-98.15
0.01896	81.68	-81.68
0.019	33.04	-33.04
0.01904	61.22	-61.22
0.01908	77.49	-77.49
0.01912	86.25	-86.25
0.01916	56.59	-56.59
0.0192	62.4	-62.4
0.01924	87.37	-87.37
0.01928	85.12	-85.12
0.01932	70.32	-70.32
0.01936	42	-42
0.0194	78.65	-78.65
0.01944	72.89	-72.89
0.01948	119.7	-119.7
0.01952	56.04	-56.04
0.01956	74.86	-74.86
0.0196	43.07	-43.07
0.01964	78.5	-78.5
0.01968	76.39	-76.39
0.01972	58.67	-58.67
0.01976	55.7	-55.7
0.0198	55.47	-55.47
0.01984	89.86	-89.86
0.01988	47	-47
0.01992	50.81	-50.81
0.01996	68.27	-68.27
0.02	82.29	-82.29
0.02004	68.41	-68.41
0.02008	59.48	-59.48
0.02012	68.27	-68.27
0.02016	63.07	-63.07
0.0202	52.63	-52.63
0.02024	40.55	-40.55
0.02028	65.58	-65.58
0.02032	56.56	-56.56
0.02036	60.87	-60.87
0.0204	89.74	-89.74
0.02044	64.63	-64.63
0.02048	80.23	-80.23
0.02052	39.48	-39.48
0.02056	30.99	-30.99
0.0206	69.05	-69.05
0.02064	69.71	-69.71
0.02068	73.07	-73.07
0.02072	61.02	-61.02
0.02076	56.07	-56.07
0.0208	59.57	-59.57
0.02084	67.03	-67.03
0.02088	43.76	-43.76
0.02092	33.27	-33.27
0.02096	48.91	-48.91
0.021	57.08	-57.08
0.02104	85.35	-85.35
0.02108	65.7	-65.7
0.02112	81.59	-81.59
0.02116	44.6	-44.6
0.0212	77.55	-77.55
0.02124	51.85	-51.85
0.02128	29.72	-29.72
0.02132	60.87	-60.87
0.02136	61.25	-61.25
0.0214	71.19	-71.19
0.02144	43.85	-43.85
0.02148	51.59	-51.59
0.02152	64.14	-64.14
0.02156	43.04	-43.04
0.0216	62.72	-62.72
0.02164	46.25	-46.25
0.02168	41.71	-41.71
0.02172	48.82	-48.82
0.02176	45.64	-45.64
0.0218	58.18	-58.18
0.02184	57.95	-57.95
0.02188	55.58	-55.58
0.02192	53.96	-53.96
0.02196	54.69	-54.69
0.022	47.46	-47.46
0.02204	41.07	-41.07
0.02208	57.17	-57.17
0.02212	36.36	-36.36
0.02216	22.87	-22.87
0.0222	43.1	-43.1
0.02224	48.62	-48.62
0.02228	60	-60
0.02232	67.55	-67.55
0.02236	45.93	-45.93
0.0224	30.78	-30.78
0.02244	52.55	-52.55
0.02248	48.7	-48.7
0.02252	21.31	-21.31
0.02256	46.88	-46.88
0.0226	44.77	-44.77
0.02264	43.85	-43.85
0.02268	39.66	-39.66
0.02272	46.39	-46.39
0.02276	25	-25
0.0228	24.57	-24.57
0.02284	36.28	-36.28
0.02288	51.54	-51.54
0.02292	27.58	-27.58
0.02296	33.41	-33.41
0.023	33.01	-33.01
0.02304	24.17	-24.17
0.02308	54.6	-54.6
0.02312	40.26	-40.26
0.02316	33.1	-33.1
0.0232	25.44	-25.44
0.02324	35.5	-35.5
0.02328	35.47	-35.47
0.02332	24.28	-24.28
0.02336	34.31	-34.31
0.0234	7.028	-7.028
0.02344	36.97	-36.97
0.02348	58.44	-58.44
0.02352	22.72	-22.72
0.02356	27.06	-27.06
0.0236	27.37	-27.37
0.02364	30.47	-30.47
0.02368	33.65	-33.65
0.02372	44.63	-44.63
0.02376	34.69	-34.69
0.0238	40.15	-40.15
0.02384	27.35	-27.35
0.02388	31.57	-31.57
0.02392	47.72	-47.72
0.02396	22.66	-22.66
0.024	31.68	-31.68
0.02404	29.8	-29.8
0.02408	29.6	-29.6
0.02412	36.65	-36.65
0.02416	38.41	-38.41
0.0242	38.27	-38.27
0.02424	19.69	-19.69
0.02428	30.21	-30.21
0.02432	8.704	-8.704
0.02436	44.69	-44.69
0.0244	21.62	-21.62
0.02444	41.45	-41.45
0.02448	18.68	-18.68
0.02452	8.155	-8.155
0.02456	17.29	-17.29
0.0246	23.94	-23.94
0.02464	19.4	-19.4
0.02468	11.51	-11.51
0.02472	43.65	-43.65
0.02476	11.1	-11.1
0.0248	47.63	-47.63
0.02484	34.54	-34.54
0.02488	30.47	-30.47
0.02492	6.855	-6.855
0.02496	17.2	-17.2
0.025	35.9	-35.9
0.02504	27.29	-27.29
0.02508	23.21	-23.21
0.02512	16.22	-16.22
0.02516	30.5	-30.5
0.0252	25.41	-25.41
0.02524	26.02	-26.02
0.02528	41.71	-41.71
0.02532	12.61	-12.61
0.02536	10.5	-10.5
0.0254	4.947	-4.947
0.02544	3.473	-3.473
0.02548	20.78	-20.78
0.02552	25.18	-25.18
0.02556	11.68	-11.68
0.0256	16.36	-16.36
0.02564	13.59	-13.59
0.02568	23.3	-23.3
0.02572	15.29	-15.29
0.02576	28.07	-28.07
0.0258	35.21	-35.21
0.02584	25.38	-25.38
0.02588	32.43	-32.43
0.02592	17.92	-17.92
0.02596	25.78	-25.78
0.026	18.1	-18.1
0.02604	25.5	-25.5
0.02608	9.109	-9.109
0.02612	8.56	-8.56
0.02616	22.35	-22.35
0.0262	30.78	-30.78
0.02624	18.99	-18.99
0.02628	23.5	-23.5
0.02632	27.17	-27.17
0.02636	40.5	-40.5
0.0264	14.37	-14.37
0.02644	19.8	-19.8
0.02648	19.25	-19.25
0.02652	21.25	-21.25
0.02656	41.88	-41.88
0.0266	35.15	-35.15
0.02664	28.88	-28.88
0.02668	28.07	-28.07
0.02672	28.07	-28.07
0.02676	22.89	-22.89
0.0268	29.92	-29.92
0.02684	17.69	-17.69
0.02688	24.95	-24.95
0.02692	33.56	-33.56
0.02696	33.41	-33.41
0.027	27.43	-27.43
0.02704	15.06	-15.06
0.02708	41.02	-41.02
0.02712	17.66	-17.66
0.02716	31.68	-31.68
0.0272	31.19	-31.19
0.02724	29.89	-29.89
0.02728	39.57	-39.57
0.02732	39.14	-39.14
0.02736	15.61	-15.61
0.0274	43.99	-43.99
0.02744	46.97	-46.97
0.02748	11.45	-11.45
0.02752	19.11	-19.11
0.02756	45.78	-45.78
0.0276	27.32	-27.32
0.02764	30.55	-30.55
0.02768	14.92	-14.92
0.02772	25.38	-25.38
0.02776	20.12	-20.12
0.0278	46.45	-46.45
0.02784	29.05	-29.05
0.02788	12.2	-12.2
0.02792	29.11	-29.11
0.02796	40.15	-40.15
0.028	28.76	-28.76
0.02804	15.55	-15.55
0.02808	25.47	-25.47
0.02812	36.19	-36.19
0.02816	26.97	-26.97
0.0282	51.77	-51.77
0.02824	20.9	-20.9
0.02828	30.67	-30.67
0.02832	42.75	-42.75
0.02836	32.35	-32.35
0.0284	15.61	-15.61
0.02844	11.05	-11.05
0.02848	41.71	-41.71
0.02852	43.24	-43.24
0.02856	34.17	-34.17
0.0286	24.54	-24.54
0.02864	19.98	-19.98
0.02868	-27.13	27.13
0.02872	11.57	-11.57
0.02876	27.87	-27.87
0.0288	35.67	-35.67
0.02884	-15.46	15.46
0.02888	-33.58	33.58
0.02892	-19.45	19.45
0.02896	19.86	-19.86
0.029	2.375	-2.375
0.02904	-37.54	37.54
0.02908	-11.04	11.04
0.02912	-8.203	8.203
0.02916	31.42	-31.42
0.0292	-21.79	21.79
0.02924	-46.81	46.81
0.02928	-22.02	22.02
0.02932	14.08	-14.08
0.02936	16.77	-16.77
0.0294	5.641	-5.641
0.02944	-7.336	7.336
0.02948	-34.97	34.97
0.02952	-34.85	34.85
0.02956	12.29	-12.29
0.0296	20.84	-20.84
0.02964	1.132	-1.132
0.02968	-21.3	21.3
0.02972	-24.39	24.39
0.02976	33.1	-33.1
0.0298	-3.694	3.694
0.02984	-1.267	1.267
0.02988	843.2m	-0.8432
0.02992	24.51	-24.51
0.02996	2.086	-2.086
0.03	-10.2	10.2
0.03004	-7.596	7.596
0.03008	7.837	-7.837
0.03012	33.36	-33.36
0.03016	31.04	-31.04
0.0302	14.98	-14.98
0.03024	-18.12	18.12
0.03028	323m	-0.323
0.03032	36.07	-36.07
0.03036	8.386	-8.386
0.0304	-8.232	8.232
0.03044	7.519	-7.519
0.03048	9.918	-9.918
0.03052	22.11	-22.11
0.03056	26.22	-26.22
0.0306	3.271	-3.271
0.03064	11.91	-11.91
0.03068	-9.735	9.735
0.03072	22.63	-22.63
0.03076	11.51	-11.51
0.0308	8.704	-8.704
0.03084	12	-12
0.03088	44.95	-44.95
0.03092	13.5	-13.5
0.03096	8.358	-8.358
0.031	17.75	-17.75
0.03104	438.6m	-0.4386
0.03108	6.363	-6.363
0.03112	15.21	-15.21
0.03116	17.09	-17.09
0.0312	30.24	-30.24
0.03124	2.202	-2.202
0.03128	-4.417	4.417
0.03132	15.96	-15.96
0.03136	14.6	-14.6
0.0314	23.85	-23.85
0.03144	22.43	-22.43
0.03148	15.24	-15.24
0.03152	5.034	-5.034
0.03156	-1.353	1.353
0.0316	-2.914	2.914
0.03164	31.77	-31.77
0.03168	-9.792	9.792
0.03172	26.74	-26.74
0.03176	9.571	-9.571
0.0318	-1.845	1.845
0.03184	23.1	-23.1
0.03188	15.12	-15.12
0.03192	31.8	-31.8
0.03196	42.49	-42.49
0.032	7.779	-7.779
0.03204	43.1	-43.1
0.03208	30.96	-30.96
0.03212	-3.261	3.261
0.03216	25.06	-25.06
0.0322	13.39	-13.39
0.03224	27.46	-27.46
0.03228	26.05	-26.05
0.03232	18.04	-18.04
0.03236	33.88	-33.88
0.0324	36.33	-36.33
0.03244	45.99	-45.99
0.03248	21.16	-21.16
0.03252	27.84	-27.84
0.03256	51.59	-51.59
0.0326	23.42	-23.42
0.03264	30.44	-30.44
0.03268	26.13	-26.13
0.03272	36.94	-36.94
0.03276	3.589	-3.589
0.0328	40.5	-40.5
0.03284	3.155	-3.155
0.03288	33.53	-33.53
0.03292	50.78	-50.78
0.03296	46.82	-46.82
0.033	16.54	-16.54
0.03304	26.57	-26.57
0.03308	10.44	-10.44
0.03312	15	-15
0.03316	40.67	-40.67
0.0332	11.13	-11.13
0.03324	44.72	-44.72
0.03328	38.27	-38.27
0.03332	17.32	-17.32
0.03336	34.54	-34.54
0.0334	34.46	-34.46
0.03344	35.26	-35.26
0.03348	32.63	-32.63
0.03352	25.78	-25.78
0.03356	19.92	-19.92
0.0336	43.67	-43.67
0.03364	24.46	-24.46
0.03368	31.31	-31.31
0.03372	29.89	-29.89
0.03376	41.42	-41.42
0.0338	14.22	-14.22
0.03384	56.22	-56.22
0.03388	20.58	-20.58
0.03392	34.54	-34.54
0.03396	34.37	-34.37
0.034	17.03	-17.03
0.03404	24.43	-24.43
0.03408	25.81	-25.81
0.03412	38.65	-38.65
0.03416	29.2	-29.2
0.0342	26.31	-26.31
0.03424	37.78	-37.78
0.03428	49.92	-49.92
0.03432	26.45	-26.45
0.03436	33.27	-33.27
0.0344	13.04	-13.04
0.03444	43.13	-43.13
0.03448	43.39	-43.39
0.03452	13.5	-13.5
0.03456	44.92	-44.92
0.0346	25.03	-25.03
0.03464	45.55	-45.55
0.03468	32.43	-32.43
0.03472	7.317	-7.317
0.03476	39.54	-39.54
0.0348	34.63	-34.63
0.03484	38.15	-38.15
0.03488	32.17	-32.17
0.03492	35.61	-35.61
0.03496	48.44	-48.44
0.035	28.41	-28.41
0.03504	39.2	-39.2
0.03508	36.42	-36.42
0.03512	25.41	-25.41
0.03516	48.44	-48.44
0.0352	27.81	-27.81
0.03524	32.49	-32.49
0.03528	35.99	-35.99
0.03532	44.37	-44.37
0.03536	35.03	-35.03
0.0354	30.47	-30.47
0.03544	38.1	-38.1
0.03548	27.2	-27.2
0.03552	24.05	-24.05
0.03556	35.73	-35.73
0.0356	44.8	-44.8
0.03564	45.84	-45.84
0.03568	36.68	-36.68
0.03572	29.92	-29.92
0.03576	28.59	-28.59
0.0358	26.19	-26.19
0.03584	10.84	-10.84
0.03588	40.44	-40.44
0.03592	25.52	-25.52
0.03596	37.26	-37.26
0.036	25.9	-25.9
0.03604	31.85	-31.85
0.03608	34.37	-34.37
0.03612	35	-35
0.03616	38.33	-38.33
0.0362	36.59	-36.59
0.03624	42.92	-42.92
0.03628	27.92	-27.92
0.03632	28.91	-28.91
0.03636	40.58	-40.58
0.0364	41.45	-41.45
0.03644	32.69	-32.69
0.03648	31.04	-31.04
0.03652	34.17	-34.17
0.03656	35	-35
0.0366	45.41	-45.41
0.03664	18.94	-18.94
0.03668	24.69	-24.69
0.03672	18.7	-18.7
0.03676	36.85	-36.85
0.0368	35.09	-35.09
0.03684	42.63	-42.63
0.03688	25	-25
0.03692	19.46	-19.46
0.03696	23.13	-23.13
0.037	35.29	-35.29
0.03704	27.29	-27.29
0.03708	40.93	-40.93
0.03712	32.2	-32.2
0.03716	31.19	-31.19
0.0372	41.45	-41.45
0.03724	21.68	-21.68
0.03728	41.25	-41.25
0.03732	32.49	-32.49
0.03736	35.41	-35.41
0.0374	17.78	-17.78
0.03744	35.03	-35.03
0.03748	34.86	-34.86
0.03752	24.72	-24.72
0.03756	24.69	-24.69
0.0376	36.57	-36.57
0.03764	28.59	-28.59
0.03768	32	-32
0.03772	42.37	-42.37
0.03776	16.8	-16.8
0.0378	35.67	-35.67
0.03784	13.85	-13.85
0.03788	42.75	-42.75
0.03792	22.26	-22.26
0.03796	23.94	-23.94
0.038	31.94	-31.94
0.03804	33.39	-33.39
0.03808	26.36	-26.36
0.03812	35.44	-35.44
0.03816	36.54	-36.54
0.0382	32.32	-32.32
0.03824	26.54	-26.54
0.03828	49.51	-49.51
0.03832	34.48	-34.48
0.03836	40.38	-40.38
0.0384	34.95	-34.95
0.03844	32.32	-32.32
0.03848	28.39	-28.39
0.03852	36.48	-36.48
0.03856	42.29	-42.29
0.0386	30.78	-30.78
0.03864	28.65	-28.65
0.03868	92.63	-92.63
0.03872	82.46	-82.46
0.03876	71.94	-71.94
0.0388	27.49	-27.49
0.03884	72.32	-72.32
0.03888	104.1	-104.1
0.03892	92.11	-92.11
0.03896	37.23	-37.23
0.039	71.68	-71.68
0.03904	69.08	-69.08
0.03908	75.15	-75.15
0.03912	84.14	-84.14
0.03916	33.96	-33.96
0.0392	74.37	-74.37
0.03924	64.02	-64.02
0.03928	74.8	-74.8
0.03932	53.7	-53.7
0.03936	60.21	-60.21
0.0394	73.76	-73.76
0.03944	87.26	-87.26
0.03948	83.99	-83.99
0.03952	67.2	-67.2
0.03956	41.83	-41.83
0.0396	48.62	-48.62
0.03964	77.58	-77.58
0.03968	90.44	-90.44
0.03972	40.84	-40.84
0.03976	53.07	-53.07
0.0398	66.8	-66.8
0.03984	68.13	-68.13
0.03988	82	-82
0.03992	46.51	-46.51
0.03996	53.21	-53.21
0.04	65.52	-65.52
0.04004	89.02	-89.02
0.04008	72.89	-72.89
0.04012	77.08	-77.08
0.04016	54.74	-54.74
0.0402	40.58	-40.58
0.04024	80.93	-80.93
0.04028	81.1	-81.1
0.04032	40.87	-40.87
0.04036	52.29	-52.29
0.0404	54.77	-54.77
0.04044	67.81	-67.81
0.04048	77.49	-77.49
0.04052	53.15	-53.15
0.04056	47.26	-47.26
0.0406	55.29	-55.29
0.04064	64.31	-64.31
0.04068	65.7	-65.7
0.04072	67.58	-67.58
0.04076	79.8	-79.8
0.0408	68.73	-68.73
0.04084	39.31	-39.31
0.04088	47.87	-47.87
0.04092	74.63	-74.63
0.04096	60.7	-60.7
0.041	81.94	-81.94
0.04104	66.48	-66.48
0.04108	65.52	-65.52
0.04112	41.56	-41.56
0.04116	72.46	-72.46
0.0412	51.25	-51.25
0.04124	76.54	-76.54
0.04128	68.82	-68.82
0.04132	75.26	-75.26
0.04136	55.21	-55.21
0.0414	53.39	-53.39
0.04144	73.73	-73.73
0.04148	74.31	-74.31
0.04152	52.58	-52.58
0.04156	45.78	-45.78
0.0416	25.87	-25.87
0.04164	55.29	-55.29
0.04168	75.99	-75.99
0.04172	59.71	-59.71
0.04176	65.81	-65.81
0.0418	62.46	-62.46
0.04184	49.08	-49.08
0.04188	58.04	-58.04
0.04192	41.28	-41.28
0.04196	46.19	-46.19
0.042	41.65	-41.65
0.04204	52.52	-52.52
0.04208	37.43	-37.43
0.04212	37.32	-37.32
0.04216	47.66	-47.66
0.0422	62.92	-62.92
0.04224	39.43	-39.43
0.04228	11.36	-11.36
0.04232	51.25	-51.25
0.04236	34.66	-34.66
0.0424	57.87	-57.87
0.04244	50.76	-50.76
0.04248	30.73	-30.73
0.04252	38.56	-38.56
0.04256	52.08	-52.08
0.0426	18.82	-18.82
0.04264	54.54	-54.54
0.04268	33.18	-33.18
0.04272	46.16	-46.16
0.04276	39.25	-39.25
0.0428	25.67	-25.67
0.04284	43.39	-43.39
0.04288	35.52	-35.52
0.04292	39.05	-39.05
0.04296	32.72	-32.72
0.043	48.73	-48.73
0.04304	53.65	-53.65
0.04308	31.16	-31.16
0.04312	41.16	-41.16
0.04316	44.66	-44.66
0.0432	28.62	-28.62
0.04324	43.56	-43.56
0.04328	32.89	-32.89
0.04332	38.41	-38.41
0.04336	46.3	-46.3
0.0434	22	-22
0.04344	39.25	-39.25
0.04348	38.93	-38.93
0.04352	32.29	-32.29
0.04356	25.99	-25.99
0.0436	39.05	-39.05
0.04364	8.068	-8.068
0.04368	45.35	-45.35
0.04372	36.8	-36.8
0.04376	23.47	-23.47
0.0438	58.99	-58.99
0.04384	20.7	-20.7
0.04388	38.18	-38.18
0.04392	40.93	-40.93
0.04396	23.44	-23.44
0.044	34.2	-34.2
0.04404	35.24	-35.24
0.04408	22.72	-22.72
0.04412	35.09	-35.09
0.04416	17.43	-17.43
0.0442	45.35	-45.35
0.04424	31.22	-31.22
0.04428	44.31	-44.31
0.04432	28.47	-28.47
0.04436	23.76	-23.76
0.0444	37.61	-37.61
0.04444	29.25	-29.25
0.04448	18.42	-18.42
0.04452	14.72	-14.72
0.04456	51.39	-51.39
0.0446	26.57	-26.57
0.04464	42.32	-42.32
0.04468	31.83	-31.83
0.04472	38.5	-38.5
0.04476	28.47	-28.47
0.0448	41.56	-41.56
0.04484	34.46	-34.46
0.04488	20	-20
0.04492	37.87	-37.87
0.04496	20	-20
0.045	20.81	-20.81
0.04504	35.21	-35.21
0.04508	36.16	-36.16
0.04512	32.89	-32.89
0.04516	26.54	-26.54
0.0452	19.63	-19.63
0.04524	38.79	-38.79
0.04528	27.49	-27.49
0.04532	31.77	-31.77
0.04536	11.8	-11.8
0.0454	14.4	-14.4
0.04544	38.7	-38.7
0.04548	23.68	-23.68
0.04552	23.47	-23.47
0.04556	22.03	-22.03
0.0456	19.57	-19.57
0.04564	15.18	-15.18
0.04568	36.51	-36.51
0.04572	23.21	-23.21
0.04576	19.72	-19.72
0.0458	6.017	-6.017
0.04584	30.61	-30.61
0.04588	36.51	-36.51
0.04592	14.4	-14.4
0.04596	21.59	-21.59
0.046	25.32	-25.32
0.04604	38.44	-38.44
0.04608	3.04	-3.04
0.04612	10.96	-10.96
0.04616	16.88	-16.88
0.0462	19.63	-19.63
0.04624	18.47	-18.47
0.04628	19.43	-19.43
0.04632	8.329	-8.329
0.04636	8.444	-8.444
0.0464	44.31	-44.31
0.04644	23.15	-23.15
0.04648	10.21	-10.21
0.04652	43.01	-43.01
0.04656	11.25	-11.25
0.0466	21.1	-21.1
0.04664	6.855	-6.855
0.04668	21.8	-21.8
0.04672	20.61	-20.61
0.04676	8.386	-8.386
0.0468	33.88	-33.88
0.04684	23.82	-23.82
0.04688	17.63	-17.63
0.04692	11.16	-11.16
0.04696	42.32	-42.32
0.047	19.92	-19.92
0.04704	29.43	-29.43
0.04708	21.91	-21.91
0.04712	29.14	-29.14
0.04716	18.42	-18.42
0.0472	29.66	-29.66
0.04724	38.79	-38.79
0.04728	16.33	-16.33
0.04732	18.36	-18.36
0.04736	19.08	-19.08
0.0474	32.89	-32.89
0.04744	33.47	-33.47
0.04748	7.808	-7.808
0.04752	49.25	-49.25
0.04756	17.81	-17.81
0.0476	25.93	-25.93
0.04764	14.02	-14.02
0.04768	27.78	-27.78
0.04772	28.24	-28.24
0.04776	34.22	-34.22
0.0478	44.17	-44.17
0.04784	21.77	-21.77
0.04788	37.17	-37.17
0.04792	23.24	-23.24
0.04796	31.54	-31.54
0.048	26.39	-26.39
0.04804	30.78	-30.78
0.04808	33.85	-33.85
0.04812	32.58	-32.58
0.04816	26.91	-26.91
0.0482	18.01	-18.01
0.04824	26.45	-26.45
0.04828	38.44	-38.44
0.04832	39.72	-39.72
0.04836	39.95	-39.95
0.0484	17.92	-17.92
0.04844	21.13	-21.13
0.04848	44.14	-44.14
0.04852	31.13	-31.13
0.04856	17.63	-17.63
0.0486	19.17	-19.17
0.04864	-8.896	8.896
0.04868	37.29	-37.29
0.04872	4.456	-4.456
0.04876	265.2m	-0.2652
0.0488	-25.11	25.11
0.04884	17.11	-17.11
0.04888	-7.625	7.625
0.04892	-2.798	2.798
0.04896	18.5	-18.5
0.049	-1.527	1.527
0.04904	-4.735	4.735
0.04908	-28.72	28.72
0.04912	-38.61	38.61
0.04916	8.531	-8.531
0.0492	18.15	-18.15
0.04924	-9.59	9.59
0.04928	1.508	-1.508
0.04932	-5.775	5.775
0.04936	14.43	-14.43
0.0494	-43.12	43.12
0.04944	-25.54	25.54
0.04948	-16.27	16.27
0.04952	20.58	-20.58
0.04956	18.65	-18.65
0.0496	-31.44	31.44
0.04964	-16.3	16.3
0.04968	-25.77	25.77
0.04972	17.52	-17.52
0.04976	-6.006	6.006
0.0498	-24.5	24.5
0.04984	323m	-0.323
0.04988	19.89	-19.89
0.04992	13.16	-13.16
0.04996	-12.48	12.48
0.05	-23.23	23.23
0.05004	-29.42	29.42
0.05008	24.83	-24.83
0.05012	6.941	-6.941
0.05016	15.52	-15.52
0.0502	4.716	-4.716
0.05024	-11.24	11.24
0.05028	-804.2m	0.8042
0.05032	7.779	-7.779
0.05036	30.5	-30.5
0.0504	28.36	-28.36
0.05044	-1.642	1.642
0.05048	7.317	-7.317
0.05052	34.43	-34.43
0.05056	5.554	-5.554
0.0506	11.71	-11.71
0.05064	8.56	-8.56
0.05068	23.1	-23.1
0.05072	-5.11	5.11
0.05076	9.138	-9.138
0.0508	16.94	-16.94
0.05084	20.12	-20.12
0.05088	15.18	-15.18
0.05092	15.64	-15.64
0.05096	-5.197	5.197
0.051	41.33	-41.33
0.05104	9.08	-9.08
0.05108	20.5	-20.5
0.05112	38.13	-38.13
0.05116	4.167	-4.167
0.0512	19.8	-19.8
0.05124	5.178	-5.178
0.05128	24.69	-24.69
0.05132	6.537	-6.537
0.05136	3.097	-3.097
0.0514	29.6	-29.6
0.05144	28.41	-28.41
0.05148	19.83	-19.83
0.05152	4.254	-4.254
0.05156	34.51	-34.51
0.0516	13.53	-13.53
0.05164	40.29	-40.29
0.05168	30.73	-30.73
0.05172	32.26	-32.26
0.05176	26.62	-26.62
0.0518	-8.868	8.868
0.05184	13.21	-13.21
0.05188	30.52	-30.52
0.05192	17.17	-17.17
0.05196	-1.411	1.411
0.052	19.69	-19.69
0.05204	15.18	-15.18
0.05208	48.27	-48.27
0.05212	8.444	-8.444
0.05216	29.69	-29.69
0.0522	41.04	-41.04
0.05224	7.057	-7.057
0.05228	33.88	-33.88
0.05232	26.77	-26.77
0.05236	24.6	-24.6
0.0524	25.29	-25.29
0.05244	28.27	-28.27
0.05248	37.32	-37.32
0.05252	14.72	-14.72
0.05256	24.86	-24.86
0.0526	23.94	-23.94
0.05264	17.98	-17.98
0.05268	-1.902	1.902
0.05272	34.98	-34.98
0.05276	47.58	-47.58
0.0528	21.33	-21.33
0.05284	32.66	-32.66
0.05288	16.28	-16.28
0.05292	20.44	-20.44
0.05296	16.65	-16.65
0.053	30.99	-30.99
0.05304	24.51	-24.51
0.05308	35.09	-35.09
0.05312	35.44	-35.44
0.05316	28.01	-28.01
0.0532	20.06	-20.06
0.05324	10.84	-10.84
0.05328	37	-37
0.05332	24.34	-24.34
0.05336	53.1	-53.1
0.0534	9.571	-9.571
0.05344	40.55	-40.55
0.05348	33.99	-33.99
0.05352	26.71	-26.71
0.05356	41.13	-41.13
0.0536	31.51	-31.51
0.05364	36.94	-36.94
0.05368	4.167	-4.167
0.05372	50.38	-50.38
0.05376	41.22	-41.22
0.0538	21.45	-21.45
0.05384	27.95	-27.95
0.05388	28.56	-28.56
0.05392	31.02	-31.02
0.05396	21.85	-21.85
0.054	32.87	-32.87
0.05404	34.74	-34.74
0.05408	48.07	-48.07
0.05412	25.9	-25.9
0.05416	23.27	-23.27
0.0542	27.84	-27.84
0.05424	41.74	-41.74
0.05428	36.1	-36.1
0.05432	11.59	-11.59
0.05436	28.53	-28.53
0.0544	37.89	-37.89
0.05444	19.28	-19.28
0.05448	33.82	-33.82
0.05452	27.69	-27.69
0.05456	33.79	-33.79
0.0546	47.03	-47.03
0.05464	31.07	-31.07
0.05468	13.13	-13.13
0.05472	22.29	-22.29
0.05476	53.07	-53.07
0.0548	23.56	-23.56
0.05484	46.36	-46.36
0.05488	43.76	-43.76
0.05492	48.27	-48.27
0.05496	24.77	-24.77
0.055	19.37	-19.37
0.05504	27.26	-27.26
0.05508	5.988	-5.988
0.05512	35.81	-35.81
0.05516	43.91	-43.91
0.0552	39.22	-39.22
0.05524	32.89	-32.89
0.05528	24.17	-24.17
0.05532	33.73	-33.73
0.05536	37.75	-37.75
0.0554	23.96	-23.96
0.05544	33.56	-33.56
0.05548	24.46	-24.46
0.05552	29.17	-29.17
0.05556	28.65	-28.65
0.0556	34.63	-34.63
0.05564	35.26	-35.26
0.05568	18.36	-18.36
0.05572	31.97	-31.97
0.05576	30.9	-30.9
0.0558	37	-37
0.05584	30.52	-30.52
0.05588	40.21	-40.21
0.05592	35.78	-35.78
0.05596	44.17	-44.17
0.056	38.99	-38.99
0.05604	26.71	-26.71
0.05608	47.87	-47.87
0.05612	31.88	-31.88
0.05616	27.03	-27.03
0.0562	32.46	-32.46
0.05624	46.25	-46.25
0.05628	35.35	-35.35
0.05632	21.65	-21.65
0.05636	38.41	-38.41
0.0564	46.77	-46.77
0.05644	42.66	-42.66
0.05648	44.05	-44.05
0.05652	26.07	-26.07
0.05656	42.78	-42.78
0.0566	27.66	-27.66
0.05664	22.2	-22.2
0.05668	27.35	-27.35
0.05672	30	-30
0.05676	20.06	-20.06
0.0568	24.63	-24.63
0.05684	32.63	-32.63
0.05688	31.36	-31.36
0.05692	27.03	-27.03
0.05696	31.1	-31.1
0.057	29.51	-29.51
0.05704	25.47	-25.47
0.05708	24.69	-24.69
0.05712	35.24	-35.24
0.05716	20.12	-20.12
0.0572	30.35	-30.35
0.05724	18.33	-18.33
0.05728	22.52	-22.52
0.05732	34.08	-34.08
0.05736	22.84	-22.84
0.0574	37.55	-37.55
0.05744	22.03	-22.03
0.05748	17.17	-17.17
0.05752	55.03	-55.03
0.05756	32.87	-32.87
0.0576	15.93	-15.93
0.05764	21.28	-21.28
0.05768	36.39	-36.39
0.05772	27.84	-27.84
0.05776	39.05	-39.05
0.0578	25.84	-25.84
0.05784	43.1	-43.1
0.05788	25.41	-25.41
0.05792	24.43	-24.43
0.05796	27.46	-27.46
0.058	29.2	-29.2
0.05804	28.33	-28.33
0.05808	22.2	-22.2
0.05812	28.96	-28.96
0.05816	28.04	-28.04
0.0582	29.95	-29.95
0.05824	28.94	-28.94
0.05828	23.1	-23.1
0.05832	36.13	-36.13
0.05836	33.21	-33.21
0.0584	33.99	-33.99
0.05844	31.71	-31.71
0.05848	23.79	-23.79
0.05852	19.48	-19.48
0.05856	27	-27
0.0586	30.32	-30.32
0.05864	47.46	-47.46
0.05868	88.15	-88.15
0.05872	72.29	-72.29
0.05876	32.11	-32.11
0.0588	78.56	-78.56
0.05884	99.57	-99.57
0.05888	111.7	-111.7
0.05892	62.78	-62.78
0.05896	21.94	-21.94
0.059	65.99	-65.99
0.05904	99.11	-99.11
0.05908	64.37	-64.37
0.05912	50.12	-50.12
0.05916	77.89	-77.89
0.0592	93.67	-93.67
0.05924	87.66	-87.66
0.05928	42.09	-42.09
0.05932	69.66	-69.66
0.05936	98.15	-98.15
0.0594	58.01	-58.01
0.05944	48.53	-48.53
0.05948	37.46	-37.46
0.05952	97.92	-97.92
0.05956	90.52	-90.52
0.0596	81.1	-81.1
0.05964	34.86	-34.86
0.05968	70.55	-70.55
0.05972	87.32	-87.32
0.05976	92.49	-92.49
0.0598	73.04	-73.04
0.05984	56.22	-56.22
0.05988	59.92	-59.92
0.05992	69.95	-69.95
0.05996	44.8	-44.8
0.06	49.92	-49.92
0.06004	72.08	-72.08
0.06008	66.85	-66.85
0.06012	81.94	-81.94
0.06016	40.61	-40.61
0.0602	61.13	-61.13
0.06024	62.55	-62.55
0.06028	45.87	-45.87
0.06032	86.51	-86.51
0.06036	52.49	-52.49
0.0604	71.39	-71.39
0.06044	70.35	-70.35
0.06048	86.45	-86.45
0.06052	23.76	-23.76
0.06056	62.06	-62.06
0.0606	74.54	-74.54
0.06064	74.95	-74.95
0.06068	74.11	-74.11
0.06072	52.95	-52.95
0.06076	29.77	-29.77
0.0608	63.27	-63.27
0.06084	68.88	-68.88
0.06088	57.29	-57.29
0.06092	64.4	-64.4
0.06096	82.72	-82.72
0.061	42	-42
0.06104	24.54	-24.54
0.06108	46.94	-46.94
0.06112	65.76	-65.76
0.06116	65.81	-65.81
0.0612	68.91	-68.91
0.06124	87.32	-87.32
0.06128	29.69	-29.69
0.06132	73.18	-73.18
0.06136	60.06	-60.06
0.0614	68.67	-68.67
0.06144	63.18	-63.18
0.06148	53.53	-53.53
0.06152	55.47	-55.47
0.06156	47.58	-47.58
0.0616	73.7	-73.7
0.06164	60.35	-60.35
0.06168	57.98	-57.98
0.06172	55.52	-55.52
0.06176	47.14	-47.14
0.0618	54.57	-54.57
0.06184	45.18	-45.18
0.06188	50.76	-50.76
0.06192	58.15	-58.15
0.06196	58.85	-58.85
0.062	39.2	-39.2
0.06204	41.59	-41.59
0.06208	62.98	-62.98
0.06212	39.72	-39.72
0.06216	52.63	-52.63
0.0622	53.07	-53.07
0.06224	15.29	-15.29
0.06228	41.94	-41.94
0.06232	44.37	-44.37
0.06236	55.84	-55.84
0.0624	52.69	-52.69
0.06244	57.17	-57.17
0.06248	58.33	-58.33
0.06252	40.29	-40.29
0.06256	42.66	-42.66
0.0626	25.26	-25.26
0.06264	46.51	-46.51
0.06268	37.29	-37.29
0.06272	54.95	-54.95
0.06276	45.55	-45.55
0.0628	44.92	-44.92
0.06284	36.39	-36.39
0.06288	33.15	-33.15
0.06292	39.4	-39.4
0.06296	26.77	-26.77
0.063	39.8	-39.8
0.06304	42.61	-42.61
0.06308	18.21	-18.21
0.06312	26.94	-26.94
0.06316	29.48	-29.48
0.0632	32.66	-32.66
0.06324	32.92	-32.92
0.06328	28.47	-28.47
0.06332	56.45	-56.45
0.06336	50.09	-50.09
0.0634	40.73	-40.73
0.06344	39.72	-39.72
0.06348	3.618	-3.618
0.06352	50.99	-50.99
0.06356	26.19	-26.19
0.0636	25.81	-25.81
0.06364	43.65	-43.65
0.06368	34.54	-34.54
0.06372	39.31	-39.31
0.06376	26.77	-26.77
0.0638	44.77	-44.77
0.06384	34.37	-34.37
0.06388	12.26	-12.26
0.06392	22.06	-22.06
0.06396	53.91	-53.91
0.064	8.415	-8.415
0.06404	19.83	-19.83
0.06408	40.7	-40.7
0.06412	48.04	-48.04
0.06416	21.54	-21.54
0.0642	23.56	-23.56
0.06424	31.45	-31.45
0.06428	30.52	-30.52
0.06432	53.04	-53.04
0.06436	42.17	-42.17
0.0644	14.66	-14.66
0.06444	32.11	-32.11
0.06448	28.27	-28.27
0.06452	27.37	-27.37
0.06456	24.77	-24.77
0.0646	11.71	-11.71
0.06464	26.88	-26.88
0.06468	31.65	-31.65
0.06472	26.97	-26.97
0.06476	15.44	-15.44
0.0648	7.924	-7.924
0.06484	36.71	-36.71
0.06488	42.78	-42.78
0.06492	24.14	-24.14
0.06496	35.96	-35.96
0.065	20.21	-20.21
0.06504	32.81	-32.81
0.06508	30	-30
0.06512	14.66	-14.66
0.06516	25.24	-25.24
0.0652	20.21	-20.21
0.06524	19.57	-19.57
0.06528	25.44	-25.44
0.06532	14.05	-14.05
0.06536	19.66	-19.66
0.0654	36.51	-36.51
0.06544	37	-37
0.06548	18.42	-18.42
0.06552	29.6	-29.6
0.06556	25.09	-25.09
0.0656	43.93	-43.93
0.06564	16.39	-16.39
0.06568	14.95	-14.95
0.06572	16.65	-16.65
0.06576	26.28	-26.28
0.0658	16.07	-16.07
0.06584	15.03	-15.03
0.06588	11.85	-11.85
0.06592	34.31	-34.31
0.06596	29.51	-29.51
0.066	16.05	-16.05
0.06604	21.19	-21.19
0.06608	15.38	-15.38
0.06612	29.77	-29.77
0.06616	-52.73m	0.05273
0.0662	39.57	-39.57
0.06624	23.1	-23.1
0.06628	34.17	-34.17
0.06632	28.1	-28.1
0.06636	10.09	-10.09
0.0664	42.52	-42.52
0.06644	26.39	-26.39
0.06648	22.95	-22.95
0.06652	20.38	-20.38
0.06656	27.84	-27.84
0.0666	30.67	-30.67
0.06664	22.4	-22.4
0.06668	28.15	-28.15
0.06672	18.91	-18.91
0.06676	24.4	-24.4
0.0668	23.36	-23.36
0.06684	33.24	-33.24
0.06688	18.73	-18.73
0.06692	19.11	-19.11
0.06696	33.62	-33.62
0.067	28.53	-28.53
0.06704	23.85	-23.85
0.06708	27.95	-27.95
0.06712	17.23	-17.23
0.06716	31.91	-31.91
0.0672	31.51	-31.51
0.06724	9.889	-9.889
0.06728	18.88	-18.88
0.06732	17.4	-17.4
0.06736	28.88	-28.88
0.0674	44.66	-44.66
0.06744	21.33	-21.33
0.06748	24.11	-24.11
0.06752	46.25	-46.25
0.06756	21.54	-21.54
0.0676	22	-22
0.06764	33.82	-33.82
0.06768	23.82	-23.82
0.06772	20.18	-20.18
0.06776	30.9	-30.9
0.0678	33.65	-33.65
0.06784	35.41	-35.41
0.06788	31.57	-31.57
0.06792	34.77	-34.77
0.06796	12.72	-12.72
0.068	19.83	-19.83
0.06804	31.97	-31.97
0.06808	27.69	-27.69
0.06812	25.52	-25.52
0.06816	23.94	-23.94
0.0682	11.36	-11.36
0.06824	36.62	-36.62
0.06828	37.32	-37.32
0.06832	6.566	-6.566
0.06836	26.91	-26.91
0.0684	33.33	-33.33
0.06844	19.17	-19.17
0.06848	22.35	-22.35
0.06852	36.28	-36.28
0.06856	41.04	-41.04
0.0686	9.456	-9.456
0.06864	18.36	-18.36
0.06868	31.42	-31.42
0.06872	17.2	-17.2
0.06876	10.5	-10.5
0.0688	-11.21	11.21
0.06884	-17.71	17.71
0.06888	27.63	-27.63
0.06892	14.54	-14.54
0.06896	-35.05	35.05
0.069	-60.75	60.75
0.06904	5.93	-5.93
0.06908	5.438	-5.438
0.06912	-15.31	15.31
0.06916	-9.301	9.301
0.0692	-37.68	37.68
0.06924	20.87	-20.87
0.06928	-1.845	1.845
0.06932	-25.17	25.17
0.06936	-13.29	13.29
0.0694	27.49	-27.49
0.06944	-15.11	15.11
0.06948	3.618	-3.618
0.06952	-14.1	14.1
0.06956	-5.602	5.602
0.0696	37.78	-37.78
0.06964	-16.53	16.53
0.06968	-27.68	27.68
0.06972	-19.97	19.97
0.06976	-890.9m	0.8909
0.0698	40.41	-40.41
0.06984	-833.1m	0.8331
0.06988	-10.05	10.05
0.06992	-42.42	42.42
0.06996	7.837	-7.837
0.07	10.84	-10.84
0.07004	-1.238	1.238
0.07008	24.31	-24.31
0.07012	15.93	-15.93
0.07016	19.69	-19.69
0.0702	843.2m	-0.8432
0.07024	8.213	-8.213
0.07028	-833.1m	0.8331
0.07032	11.02	-11.02
0.07036	33.13	-33.13
0.0704	2.404	-2.404
0.07044	22.06	-22.06
0.07048	-9.937	9.937
0.07052	20.41	-20.41
0.07056	-4.879	4.879
0.0706	20.55	-20.55
0.07064	1.941	-1.941
0.07068	16.39	-16.39
0.07072	43.1	-43.1
0.07076	-2.914	2.914
0.0708	-139.4m	0.1394
0.07084	-7.567	7.567
0.07088	-1.816	1.816
0.07092	-4.793	4.793
0.07096	12.63	-12.63
0.071	16.1	-16.1
0.07104	2.751	-2.751
0.07108	9.456	-9.456
0.07112	20.61	-20.61
0.07116	35.03	-35.03
0.0712	2.982	-2.982
0.07124	35.18	-35.18
0.07128	-4.446	4.446
0.07132	11.22	-11.22
0.07136	2.924	-2.924
0.0714	16.65	-16.65
0.07144	8.878	-8.878
0.07148	13.68	-13.68
0.07152	15.76	-15.76
0.07156	25.06	-25.06
0.0716	13.73	-13.73
0.07164	20.38	-20.38
0.07168	28.65	-28.65
0.07172	15.81	-15.81
0.07176	14.66	-14.66
0.0718	12	-12
0.07184	24.6	-24.6
0.07188	20.44	-20.44
0.07192	1.71	-1.71
0.07196	10.12	-10.12
0.072	34.34	-34.34
0.07204	27.87	-27.87
0.07208	12.66	-12.66
0.07212	14.69	-14.69
0.07216	7.346	-7.346
0.0722	31.02	-31.02
0.07224	19.05	-19.05
0.07228	30.7	-30.7
0.07232	21.39	-21.39
0.07236	20.32	-20.32
0.0724	16.45	-16.45
0.07244	22.61	-22.61
0.07248	13.91	-13.91
0.07252	29.57	-29.57
0.07256	22.29	-22.29
0.0726	21.28	-21.28
0.07264	25.61	-25.61
0.07268	45.52	-45.52
0.07272	20.52	-20.52
0.07276	43.07	-43.07
0.0728	14.74	-14.74
0.07284	23.91	-23.91
0.07288	34.6	-34.6
0.07292	10.03	-10.03
0.07296	29.25	-29.25
0.073	27.98	-27.98
0.07304	19.17	-19.17
0.07308	35.76	-35.76
0.07312	23.79	-23.79
0.07316	35	-35
0.0732	38.82	-38.82
0.07324	42	-42
0.07328	42.58	-42.58
0.07332	30.52	-30.52
0.07336	32.35	-32.35
0.0734	34.72	-34.72
0.07344	22.92	-22.92
0.07348	28.36	-28.36
0.07352	27.87	-27.87
0.07356	29.77	-29.77
0.0736	36.42	-36.42
0.07364	28.73	-28.73
0.07368	23.47	-23.47
0.07372	51.28	-51.28
0.07376	19.22	-19.22
0.0738	35.58	-35.58
0.07384	19.11	-19.11
0.07388	26.59	-26.59
0.07392	30.21	-30.21
0.07396	21.16	-21.16
0.074	36.8	-36.8
0.07404	39.54	-39.54
0.07408	17.89	-17.89
0.07412	39.74	-39.74
0.07416	32.52	-32.52
0.0742	35.73	-35.73
0.07424	36.57	-36.57
0.07428	22.52	-22.52
0.07432	45.73	-45.73
0.07436	33.99	-33.99
0.0744	44.74	-44.74
0.07444	8.011	-8.011
0.07448	24.77	-24.77
0.07452	39.17	-39.17
0.07456	32.52	-32.52
0.0746	32.2	-32.2
0.07464	49.45	-49.45
0.07468	28.68	-28.68
0.07472	31.94	-31.94
0.07476	25.52	-25.52
0.0748	17.58	-17.58
0.07484	43.99	-43.99
0.07488	19.2	-19.2
0.07492	21.02	-21.02
0.07496	46.51	-46.51
0.075	39.17	-39.17
0.07504	54.45	-54.45
0.07508	7.808	-7.808
0.07512	30.84	-30.84
0.07516	56.48	-56.48
0.0752	32.52	-32.52
0.07524	27.81	-27.81
0.07528	29.57	-29.57
0.07532	39.43	-39.43
0.07536	46.02	-46.02
0.0754	22.09	-22.09
0.07544	47.84	-47.84
0.07548	56.07	-56.07
0.07552	41.65	-41.65
0.07556	25.44	-25.44
0.0756	27.66	-27.66
0.07564	32.37	-32.37
0.07568	33.15	-33.15
0.07572	32.63	-32.63
0.07576	47.66	-47.66
0.0758	27.95	-27.95
0.07584	33.7	-33.7
0.07588	28.24	-28.24
0.07592	25.81	-25.81
0.07596	55.26	-55.26
0.076	42.69	-42.69
0.07604	33.44	-33.44
0.07608	33.99	-33.99
0.07612	14.98	-14.98
0.07616	20.32	-20.32
0.0762	42.92	-42.92
0.07624	39.02	-39.02
0.07628	30.5	-30.5
0.07632	23.65	-23.65
0.07636	39.11	-39.11
0.0764	28.56	-28.56
0.07644	40.96	-40.96
0.07648	34.8	-34.8
0.07652	51.3	-51.3
0.07656	24.8	-24.8
0.0766	45.96	-45.96
0.07664	33.73	-33.73
0.07668	19.14	-19.14
0.07672	25.5	-25.5
0.07676	25.32	-25.32
0.0768	35.87	-35.87
0.07684	23.88	-23.88
0.07688	33.88	-33.88
0.07692	20.47	-20.47
0.07696	37.09	-37.09
0.077	36.36	-36.36
0.07704	21.91	-21.91
0.07708	41.1	-41.1
0.07712	26.88	-26.88
0.07716	43.41	-43.41
0.0772	24.74	-24.74
0.07724	43.21	-43.21
0.07728	31.71	-31.71
0.07732	19.28	-19.28
0.07736	42.06	-42.06
0.0774	45.29	-45.29
0.07744	33.44	-33.44
0.07748	22	-22
0.07752	19.8	-19.8
0.07756	23.13	-23.13
0.0776	21.42	-21.42
0.07764	39.43	-39.43
0.07768	27.49	-27.49
0.07772	18.39	-18.39
0.07776	39.6	-39.6
0.0778	25.12	-25.12
0.07784	31.71	-31.71
0.07788	30.41	-30.41
0.07792	39.77	-39.77
0.07796	32.63	-32.63
0.078	37.95	-37.95
0.07804	26.28	-26.28
0.07808	8.213	-8.213
0.07812	24.72	-24.72
0.07816	33.99	-33.99
0.0782	24.83	-24.83
0.07824	39.17	-39.17
0.07828	41.33	-41.33
0.07832	30.03	-30.03
0.07836	38.53	-38.53
0.0784	40.18	-40.18
0.07844	9.485	-9.485
0.07848	19.6	-19.6
0.07852	48.7	-48.7
0.07856	43.21	-43.21
0.0786	40.5	-40.5
0.07864	41.04	-41.04
0.07868	68.67	-68.67
0.07872	62.75	-62.75
0.07876	64.34	-64.34
0.0788	74.77	-74.77
0.07884	70.73	-70.73
0.07888	53.67	-53.67
0.07892	61.85	-61.85
0.07896	74.86	-74.86
0.079	111.1	-111.1
0.07904	44.14	-44.14
0.07908	44.77	-44.77
0.07912	59.05	-59.05
0.07916	78.47	-78.47
0.0792	37.75	-37.75
0.07924	61.65	-61.65
0.07928	103.3	-103.3
0.07932	93.88	-93.88
0.07936	65.61	-65.61
0.0794	55.24	-55.24
0.07944	78.93	-78.93
0.07948	75.18	-75.18
0.07952	61.59	-61.59
0.07956	51.85	-51.85
0.0796	79.97	-79.97
0.07964	91.07	-91.07
0.07968	97.26	-97.26
0.07972	69.25	-69.25
0.07976	39.11	-39.11
0.0798	44.66	-44.66
0.07984	67.06	-67.06
0.07988	82.49	-82.49
0.07992	66.1	-66.1
[truncated: 98,001 more rows]

## Sheet: Sheet1
		120	2500
time	data	butfilt1	Stress
0.494	-16.77	-8.55425	-0.0034217
0.49404	-5.265	-8.41339	-0.00336536
0.49408	-8.675	-8.27415	-0.00330966
0.49412	-2.173	-8.13672	-0.00325469
0.49416	-19.48	-8.00131	-0.00320052
0.4942	4.764	-7.86808	-0.00314723
0.49424	14.24	-7.73724	-0.0030949
0.49428	9.619	-7.60897	-0.00304359
0.49432	7.394	-7.48343	-0.00299337
0.49436	7.047	-7.36077	-0.00294431
0.4944	5.977	-7.24115	-0.00289646
0.49444	10.46	-7.12468	-0.00284987
0.49448	-12.55	-7.01148	-0.00280459
0.49452	-4.514	-6.90167	-0.00276067
0.49456	-4.571	-6.79535	-0.00271814
0.4946	-1.421	-6.69263	-0.00267705
0.49464	-4.86	-6.5936	-0.00263744
0.49468	-14.08	-6.49837	-0.00259935
0.49472	1.035	-6.40705	-0.00256282
0.49476	-12.58	-6.31972	-0.00252789
0.4948	-10.7	-6.23649	-0.0024946
0.49484	17.51	-6.15747	-0.00246299
0.49488	-1.421	-6.08275	-0.0024331
0.49492	-14.63	-6.01243	-0.00240497
0.49496	10.8	-5.94659	-0.00237864
0.495	8.405	-5.88531	-0.00235413
0.49504	4.85	-5.82868	-0.00233147
0.49508	-4.225	-5.77676	-0.0023107
0.49512	2.047	-5.72961	-0.00229184
0.49516	1.729	-5.68728	-0.00227491
0.4952	-0.9299	-5.64982	-0.00225993
0.49524	-32.55	-5.61727	-0.00224691
0.49528	-8.386	-5.58969	-0.00223588
0.49532	-9.658	-5.56713	-0.00222685
0.49536	8.954	-5.54964	-0.00221986
0.4954	-14.22	-5.53729	-0.00221492
0.49544	-0.3808	-5.53015	-0.00221206
0.49548	-0.6409	-5.52826	-0.0022113
0.49552	-17.03	-5.53169	-0.00221268
0.49556	2.249	-5.54049	-0.0022162
0.4956	19.73	-5.55473	-0.00222189
0.49564	15.02	-5.57444	-0.00222978
0.49568	11.9	-5.59967	-0.00223987
0.49572	11.76	-5.63044	-0.00225218
0.49576	2.191	-5.66675	-0.0022667
0.4958	-25.67	-5.70859	-0.00228344
0.49584	-6.537	-5.75596	-0.00230239
0.49588	-17.92	-5.80886	-0.00232354
0.49592	-17.49	-5.86727	-0.00234691
0.49596	1.151	-5.93122	-0.00237249
0.496	14.19	-6.00072	-0.00240029
0.49604	-14.86	-6.07577	-0.00243031
0.49608	-6.595	-6.15639	-0.00246256
0.49612	12.16	-6.24257	-0.00249703
0.49616	-4.918	-6.33432	-0.00253373
0.4962	8.145	-6.43163	-0.00257265
0.49624	-14.54	-6.53448	-0.00261379
0.49628	1.093	-6.64285	-0.00265714
0.49632	-2.693	-6.75674	-0.00270269
0.49636	-14.89	-6.8761	-0.00275044
0.4964	-30	-7.00093	-0.00280037
0.49644	-7.808	-7.1312	-0.00285248
0.49648	-17.46	-7.26692	-0.00290677
0.49652	-10.7	-7.40807	-0.00296323
0.49656	-0.4675	-7.55467	-0.00302187
0.4966	-12.43	-7.70672	-0.00308269
0.49664	2.249	-7.86423	-0.00314569
0.49668	6.035	-8.02721	-0.00321088
0.49672	1.295	-8.19565	-0.00327826
0.49676	-8.155	-8.36954	-0.00334782
0.4968	1.006	-8.54887	-0.00341955
0.49684	-7.317	-8.73362	-0.00349345
0.49688	-9.542	-8.92376	-0.0035695
0.49692	-15.67	-9.11926	-0.00364771
0.49696	8.261	-9.3201	-0.00372804
0.497	-22.61	-9.52625	-0.0038105
0.49704	-11.36	-9.73768	-0.00389507
0.49708	-15.41	-9.95436	-0.00398174
0.49712	-9.138	-10.1763	-0.00407051
0.49716	18.93	-10.4034	-0.00416135
0.4972	0.9776	-10.6357	-0.00425426
0.49724	3.723	-10.8731	-0.00434923
0.49728	-9.167	-11.1156	-0.00444623
0.49732	-4.456	-11.3631	-0.00454523
0.49736	11.76	-11.6155	-0.00464621
0.4974	-0.5253	-11.8729	-0.00474914
0.49744	-16.36	-12.1349	-0.00485398
0.49748	-17.69	-12.4017	-0.00496069
0.49752	1.7	-12.6731	-0.00506923
0.49756	1.989	-12.9489	-0.00517955
0.4976	-4.456	-13.2291	-0.00529163
0.49764	3.579	-13.5135	-0.00540541
0.49768	3.347	-13.8021	-0.00552083
0.49772	-2.866	-14.0946	-0.00563785
0.49776	10.98	-14.391	-0.00575639
0.4978	-2.519	-14.691	-0.0058764
0.49784	-3.704	-14.9945	-0.0059978
0.49788	-17.14	-15.3013	-0.00612051
0.49792	-5.265	-15.6111	-0.00624446
0.49796	-3.965	-15.9239	-0.00636955
0.498	-9.86	-16.2393	-0.00649571
0.49804	-32.75	-16.5571	-0.00662284
0.49808	-4.889	-16.8772	-0.00675086
0.49812	-7.173	-17.1992	-0.00687969
0.49816	8.116	-17.523	-0.00700922
0.4982	7.914	-17.8484	-0.00713937
0.49824	3.087	-18.1751	-0.00727003
0.49828	-10.35	-18.5027	-0.00740109
0.49832	-14.95	-18.8311	-0.00753245
0.49836	-23.65	-19.1599	-0.00766397
0.4984	-24.28	-19.4889	-0.00779555
0.49844	-11.16	-19.8176	-0.00792706
0.49848	-16.16	-20.1459	-0.00805838
0.49852	-2.433	-20.4735	-0.00818939
0.49856	-14.86	-20.7999	-0.00831997
0.4986	-10.7	-21.125	-0.00845
0.49864	-5.525	-21.4483	-0.00857933
0.49868	1.584	-21.7696	-0.00870785
0.49872	-11.91	-22.0885	-0.0088354
0.49876	-33.15	-22.4046	-0.00896185
0.4988	-16.83	-22.7176	-0.00908704
0.49884	-19.02	-23.0271	-0.00921083
0.49888	-43.07	-23.3327	-0.00933307
0.49892	-77.52	-23.634	-0.00945362
0.49896	-78.15	-23.9308	-0.00957233
0.499	-28.44	-24.2227	-0.00968909
0.49904	-35.15	-24.5094	-0.00980378
0.49908	-72.11	-24.7907	-0.00991629
0.49912	-43.01	-25.0663	-0.0100265
0.49916	-14.6	-25.336	-0.0101344
0.4992	-1.884	-25.5996	-0.0102398
0.49924	-25.64	-25.8568	-0.0103427
0.49928	-69.97	-26.1074	-0.010443
0.49932	-31.8	-26.3513	-0.0105405
0.49936	-22.09	-26.5882	-0.0106353
0.4994	-31.16	-26.818	-0.0107272
0.49944	-41.48	-27.0403	-0.0108161
0.49948	-53.56	-27.2552	-0.0109021
0.49952	-29.69	-27.4623	-0.0109849
0.49956	-39.11	-27.6615	-0.0110646
0.4996	-47.78	-27.8526	-0.0111411
0.49964	-67.81	-28.0356	-0.0112143
0.49968	-26.54	-28.2103	-0.0112841
0.49972	-10.24	-28.3766	-0.0113507
0.49976	-2.664	-28.5344	-0.0114138
0.4998	-35.41	-28.6836	-0.0114734
0.49984	-29.05	-28.824	-0.0115296
0.49988	-12.98	-28.9555	-0.0115822
0.49992	-39.86	-29.078	-0.0116312
0.49996	-44.77	-29.1914	-0.0116766
0.5	-43.27	-29.2956	-0.0117182
0.50004	-7.548	-29.3903	-0.0117561
0.50008	-47.52	-29.4755	-0.0117902
0.50012	-43.88	-29.5511	-0.0118204
0.50016	-26.31	-29.617	-0.0118468
0.5002	-32.03	-29.673	-0.0118692
0.50024	-13.39	-29.7192	-0.0118877
0.50028	-26.02	-29.7552	-0.0119021
0.50032	-29.05	-29.7812	-0.0119125
0.50036	-33.73	-29.7968	-0.0119187
0.5004	-29.54	-29.8021	-0.0119208
0.50044	-189.7	-29.7969	-0.0119188
0.50048	-48.76	-29.7812	-0.0119125
0.50052	-42.98	-29.7549	-0.011902
0.50056	-61.82	-29.7181	-0.0118872
0.5006	-73.41	-29.6707	-0.0118683
0.50064	-55.73	-29.613	-0.0118452
0.50068	-29.28	-29.5449	-0.011818
0.50072	-28.7	-29.4667	-0.0117867
0.50076	-27.61	-29.3784	-0.0117514
0.5008	-37	-29.2802	-0.0117121
0.50084	-57.23	-29.1721	-0.0116689
0.50088	-17.95	-29.0545	-0.0116218
0.50092	-10.29	-28.9273	-0.0115709
0.50096	-27.03	-28.7907	-0.0115163
0.501	-34.22	-28.6449	-0.011458
0.50104	-37.26	-28.49	-0.011396
0.50108	-58.5	-28.3262	-0.0113305
0.50112	-29.02	-28.1535	-0.0112614
0.50116	1.671	-27.9722	-0.0111889
0.5012	12.62	-27.7824	-0.011113
0.50124	-30.5	-27.5843	-0.0110337
0.50128	-59.95	-27.3779	-0.0109512
0.50132	-66.1	-27.1635	-0.0108654
0.50136	-59.89	-26.941	-0.0107764
0.5014	-50.15	-26.7108	-0.0106843
0.50144	-35.24	-26.4731	-0.0105892
0.50148	-9.687	-26.2279	-0.0104912
0.50152	-29.69	-25.9756	-0.0103902
0.50156	-3.993	-25.7163	-0.0102865
0.5016	-15.58	-25.4504	-0.0101801
0.50164	-29.74	-25.1779	-0.0100711
0.50168	-8.82	-24.899	-0.00995961
0.50172	-10.5	-24.614	-0.00984562
0.50176	-14.17	-24.3231	-0.00972924
0.5018	-10.18	-24.0264	-0.00961054
0.50184	-13.88	-23.724	-0.00948959
0.50188	-27.81	-23.4161	-0.00936645
0.50192	-68.7	-23.1029	-0.00924117
0.50196	-66.22	-22.7846	-0.00911382
0.502	-38.47	-22.4612	-0.00898447
0.50204	-31.19	-22.133	-0.00885321
0.50208	-14.02	-21.8003	-0.00872012
0.50212	-41.42	-21.4632	-0.0085853
0.50216	-45.52	-21.1221	-0.00844884
0.5022	-28.59	-20.7771	-0.00831086
0.50224	-6.941	-20.4286	-0.00817144
0.50228	-51.45	-20.0768	-0.0080307
0.50232	-22.78	-19.7219	-0.00788875
0.50236	-19.77	-19.3643	-0.00774571
0.5024	-22.11	-19.0042	-0.00760168
0.50244	-13.99	-18.642	-0.0074568
0.50248	9.677	-18.2779	-0.00731116
0.50252	9.041	-17.9122	-0.00716489
0.50256	5.515	-17.5453	-0.0070181
0.5026	22.1	-17.1772	-0.00687088
0.50264	7.307	-16.8083	-0.00672333
0.50268	-10.12	-16.4388	-0.00657551
0.50272	-38.24	-16.0688	-0.00642752
0.50276	-35	-15.6985	-0.00627941
0.5028	-30.32	-15.3281	-0.00613126
0.50284	-3.704	-14.9579	-0.00598315
0.50288	-11.36	-14.5879	-0.00583518
0.50292	-16.57	-14.2185	-0.00568741
0.50296	-10.09	-13.8498	-0.00553994
0.503	-6.306	-13.4821	-0.00539284
0.50304	-10.06	-13.1155	-0.00524619
0.50308	-3.502	-12.7502	-0.00510009
0.50312	18.84	-12.3865	-0.00495459
0.50316	15.89	-12.0244	-0.00480977
0.5032	-9.08	-11.6643	-0.00466571
0.50324	6.18	-11.3061	-0.00452245
0.50328	-8.444	-10.9501	-0.00438005
0.50332	-14.4	-10.5964	-0.00423857
0.50336	7.683	-10.2451	-0.00409804
0.5034	-17.2	-9.89629	-0.00395851
0.50344	-3.647	-9.55011	-0.00382004
0.50348	20.95	-9.20667	-0.00368267
0.50352	20.02	-8.86608	-0.00354643
0.50356	8.521	-8.5284	-0.00341136
0.5036	-14.77	-8.19372	-0.00327749
0.50364	7.683	-7.86208	-0.00314483
0.50368	-6.132	-7.53352	-0.00301341
0.50372	-14.28	-7.2081	-0.00288324
0.50376	-13.65	-6.88585	-0.00275434
0.5038	-11.85	-6.56682	-0.00262673
0.50384	-1.363	-6.25104	-0.00250042
0.50388	-6.999	-5.93858	-0.00237543
0.50392	10.17	-5.62949	-0.0022518
0.50396	-0.6409	-5.3238	-0.00212952
0.504	13.09	-5.02156	-0.00200863
0.50404	9.503	-4.7228	-0.00188912
0.50408	-3.387	-4.42754	-0.00177102
0.50412	4.908	-4.13578	-0.00165431
0.50416	-1.826	-3.84754	-0.00153902
0.5042	8.058	-3.56281	-0.00142512
0.50424	-16.83	-3.28158	-0.00131263
0.50428	-20.87	-3.00386	-0.00120154
0.50432	-24.8	-2.72963	-0.00109185
0.50436	-15.84	-2.45892	-0.000983569
0.5044	-9.687	-2.19176	-0.000876703
0.50444	-9.947	-1.92818	-0.000771271
0.50448	5.024	-1.66823	-0.00066729
0.50452	3.839	-1.41196	-0.000564783
0.50456	25.89	-1.15942	-0.000463767
0.5046	3.058	-0.910647	-0.000364259
0.50464	16.61	-0.665673	-0.000266269
0.50468	18.2	-0.424513	-0.000169805
0.50472	41.76	-0.18717	-7.4868e-05
0.50476	18.03	0.0463734	1.85494e-05
0.5048	-8.011	0.276154	0.000110462
0.50484	7.105	0.502223	0.000200889
0.50488	-31.91	0.724635	0.000289854
0.50492	-4.976	0.943439	0.000377376
0.50496	13.72	1.15867	0.000463469
0.505	-2.346	1.37037	0.000548147
0.50504	11.58	1.57856	0.000631424
0.50508	1.353	1.78329	0.000713315
0.50512	22.16	1.98459	0.000793835
0.50516	27.91	2.18251	0.000873003
0.5052	12.57	2.37711	0.000950845
0.50524	33.64	2.56847	0.00102739
0.50528	21.73	2.75669	0.00110268
0.50532	-19.05	2.94186	0.00117675
0.50536	16.84	3.12412	0.00124965
0.5054	2.365	3.30357	0.00132143
0.50544	11.15	3.48035	0.00139214
0.50548	23.46	3.65456	0.00146183
0.50552	15.72	3.82636	0.00153054
0.50556	25.08	3.99587	0.00159835
0.5056	30.02	4.16326	0.00166531
0.50564	23.17	4.3287	0.00173148
0.50568	-15.26	4.49239	0.00179695
0.50572	-22.37	4.6545	0.0018618
0.50576	-14.02	4.81525	0.0019261
0.5058	-22.14	4.97479	0.00198991
0.50584	-46.39	5.13328	0.00205331
0.50588	-10.76	5.29084	0.00211634
0.50592	-11.28	5.44758	0.00217903
0.50596	38.29	5.60357	0.00224143
0.506	31.12	5.7589	0.00230356
0.50604	28.06	5.91365	0.00236546
0.50608	21.87	6.06793	0.00242717
0.50612	32.45	6.22186	0.00248875
0.50616	30.43	6.3756	0.00255024
0.5062	-2.722	6.52931	0.00261172
0.50624	-31.42	6.68315	0.00267326
0.50628	-23.47	6.8373	0.00273492
0.50632	-25.26	6.99189	0.00279676
0.50636	-19.83	7.14705	0.00285882
0.5064	-11.88	7.30287	0.00292115
0.50644	-7.462	7.45942	0.00298377
0.50648	-23.53	7.61677	0.00304671
0.50652	14.16	7.77494	0.00310998
0.50656	14.33	7.93397	0.00317359
0.5066	19.71	8.09388	0.00323755
0.50664	24.62	8.2547	0.00330188
0.50668	-0.005073	8.41647	0.00336659
0.50672	0.3128	8.57922	0.00343169
0.50676	-8.704	8.743	0.0034972
0.5068	-5.93	8.90785	0.00356314
0.50684	-9.138	9.07379	0.00362951
0.50688	6.989	9.24081	0.00369633
0.50692	22.83	9.40894	0.00376357
0.50696	11.01	9.57815	0.00383126
0.507	10.6	9.74846	0.00389938
0.50704	8.607	9.91987	0.00396795
0.50708	-0.5831	10.0924	0.00403695
0.50712	-2.866	10.266	0.00410639
0.50716	15.98	10.4407	0.00417628
0.5072	10.86	10.6165	0.0042466
0.50724	16.41	10.7934	0.00431735
0.50728	12.94	10.9713	0.00438853
0.50732	-9.658	11.1503	0.00446013
0.50736	-0.323	11.3304	0.00453215
0.5074	-3.213	11.5115	0.00460458
0.50744	-11.71	11.6935	0.00467742
0.50748	6.035	11.8766	0.00475063
0.50752	8.145	12.0605	0.00482421
0.50756	22.77	12.2453	0.00489811
0.5076	19.47	12.4308	0.00497232
0.50764	19.04	12.617	0.00504681
0.50768	19.5	12.8039	0.00512156
0.50772	-6.768	12.9914	0.00519655
0.50776	10.54	13.1794	0.00527175
0.5078	3.694	13.3679	0.00534715
0.50784	-4.629	13.5568	0.00542271
0.50788	-1.624	13.746	0.00549841
0.50792	16.06	13.9355	0.00557421
0.50796	-1.537	14.1252	0.00565008
0.508	5.602	14.3149	0.00572597
0.50804	8.145	14.5046	0.00580185
0.50808	6.555	14.6941	0.00587765
0.50812	13.41	14.8834	0.00595334
0.50816	1.209	15.0722	0.00602887
0.5082	-3.878	15.2604	0.00610417
0.50824	-3.329	15.448	0.00617919
0.50828	-3.704	15.6347	0.00625387
0.50832	0.3995	15.8204	0.00632814
0.50836	-19.08	16.0048	0.00640192
0.5084	8.058	16.1878	0.00647513
0.50844	-7.028	16.3692	0.00654768
0.50848	38.58	16.5487	0.00661947
0.50852	17.57	16.726	0.00669041
0.50856	17.05	16.901	0.00676039
0.5086	16.58	17.0733	0.00682932
0.50864	16.44	17.2428	0.00689712
0.50868	9.359	17.4092	0.00696366
0.50872	15.6	17.5722	0.00702888
0.50876	-2.519	17.7316	0.00709265
0.5088	-3.415	17.8872	0.0071549
0.50884	15.25	18.0387	0.00721549
0.50888	22.39	18.1858	0.00727434
0.50892	9.821	18.3283	0.00733131
0.50896	25.4	18.4658	0.00738631
0.509	45.37	18.598	0.00743921
0.50904	77.02	18.7248	0.00748991
0.50908	70.77	18.8458	0.00753831
0.50912	22.65	18.9608	0.00758431
0.50916	33.35	19.0696	0.00762786
0.5092	25.25	19.1722	0.00766887
0.50924	59.73	19.2682	0.00770729
0.50928	17.13	19.3577	0.00774307
0.50932	37.71	19.4404	0.00777615
0.50936	38.32	19.5162	0.00780648
0.5094	41.32	19.5851	0.00783403
0.50944	-0.2074	19.6469	0.00785876
0.50948	45.37	19.7016	0.00788063
0.50952	64.18	19.7491	0.00789963
0.50956	39.79	19.7893	0.00791572
0.5096	49.39	19.8222	0.0079289
0.50964	18	19.8479	0.00793915
0.50968	30.11	19.8662	0.00794649
0.50972	47.86	19.8773	0.00795091
0.50976	25.75	19.8811	0.00795243
0.5098	18.9	19.8776	0.00795106
0.50984	44.13	19.867	0.00794682
0.50988	0.2839	19.8493	0.00793973
0.50992	9.995	19.8245	0.00792982
0.50996	29.21	19.7927	0.0079171
0.51	57.57	19.754	0.00790159
0.51004	38.38	19.7083	0.00788333
0.51008	55.92	19.6558	0.00786234
0.51012	19.5	19.5966	0.00783866
0.51016	21.53	19.5308	0.00781233
0.5102	43.81	19.4586	0.00778342
0.51024	16.99	19.3799	0.00775197
0.51028	23.17	19.2951	0.00771804
0.51032	-24.08	19.2042	0.00768169
0.51036	8.463	19.1074	0.00764298
0.5104	-12.14	19.0049	0.00760195
0.51044	39.82	18.8966	0.00755864
0.51048	25.69	18.7827	0.0075131
0.51052	60.11	18.6634	0.00746535
0.51056	21.09	18.5386	0.00741546
0.5106	29.24	18.4087	0.00736346
0.51064	11.32	18.2735	0.00730942
0.51068	25.92	18.1335	0.00725339
0.51072	18.32	17.9886	0.00719542
0.51076	16.67	17.839	0.00713559
0.5108	13.2	17.6849	0.00707395
0.51084	-7.259	17.5264	0.00701055
0.51088	-17.52	17.3636	0.00694546
0.51092	1.151	17.1968	0.00687871
0.51096	7.827	17.0259	0.00681036
0.511	29.82	16.8511	0.00674044
0.51104	53.29	16.6724	0.00666898
0.51108	52.51	16.49	0.00659601
0.51112	57.25	16.304	0.00652159
0.51116	48.84	16.1144	0.00644577
0.5112	-1.277	15.9216	0.00636863
0.51124	-27.58	15.7256	0.00629023
0.51128	2.365	15.5266	0.00621066
0.51132	-8.762	15.3249	0.00612998
0.51136	17.86	15.1206	0.00604824
0.5114	-13.3	14.9137	0.0059655
0.51144	15.37	14.7045	0.00588181
0.51148	20.75	14.493	0.00579721
0.51152	37.42	14.2794	0.00571174
0.51156	18.14	14.0637	0.00562546
0.5116	32.1	13.846	0.00553842
0.51164	18.46	13.6266	0.00545065
0.51168	24.19	13.4056	0.00536224
0.51172	13.84	13.1831	0.00527323
0.51176	8.983	12.9592	0.00518369
0.5118	14.56	12.7342	0.00509368
0.51184	-21.77	12.5082	0.00500327
0.51188	-14.83	12.2813	0.00491251
0.51192	-18.33	12.0537	0.00482147
0.51196	-3.762	11.8254	0.00473017
0.512	20.08	11.5967	0.00463867
0.51204	33.75	11.3675	0.00454698
0.51208	26.5	11.1379	0.00445515
0.51212	20.6	10.908	0.00436321
0.51216	32.74	10.678	0.0042712
0.5122	20.77	10.4479	0.00417918
0.51224	4.648	10.218	0.00408719
0.51228	-16.25	9.98823	0.00399529
0.51232	-16.51	9.75884	0.00390354
0.51236	0.6019	9.52993	0.00381197
0.5124	-20.5	9.30159	0.00372064
0.51244	11.3	9.07392	0.00362957
0.51248	4.157	8.84697	0.00353879
0.51252	27.97	8.62083	0.00344833
0.51256	27.68	8.39555	0.00335822
0.5126	11.93	8.17123	0.00326849
0.51264	28.61	7.94794	0.00317917
0.51268	12.42	7.72578	0.00309031
0.51272	5.082	7.50487	0.00300195
0.51276	6.873	7.28533	0.00291413
0.5128	-25.96	7.06726	0.00282691
0.51284	-26.59	6.85078	0.00274031
0.51288	-29.48	6.63596	0.00265438
0.51292	-21.88	6.42287	0.00256915
0.51296	-20.64	6.21155	0.00248462
0.513	13.26	6.00199	0.0024008
0.51304	15.4	5.79421	0.00231768
0.51308	40.75	5.58818	0.00223527
0.51312	20.25	5.38393	0.00215357
0.51316	12.83	5.18147	0.00207259
0.5132	13.12	4.98083	0.00199233
0.51324	-1.277	4.78207	0.00191283
0.51328	6.353	4.58524	0.00183409
0.51332	7.538	4.39038	0.00175615
0.51336	1.267	4.19754	0.00167902
0.5134	-18.18	4.00678	0.00160271
0.51344	-34.08	3.81814	0.00152726
0.51348	-25.38	3.63164	0.00145266
0.51352	-16.07	3.44729	0.00137892
0.51356	17.62	3.26507	0.00130603
0.5136	0.9776	3.08494	0.00123398
0.51364	16.18	2.90689	0.00116276
0.51368	16.99	2.73088	0.00109235
0.51372	19.79	2.55689	0.00102276
0.51376	-1.855	2.38492	0.00095397
0.5138	-4.485	2.21498	0.000885991
0.51384	-13.47	2.04705	0.000818821
0.51388	-42.69	1.88114	0.000752457
0.51392	-4.196	1.71723	0.00068689
0.51396	-17.66	1.55526	0.000622104
0.514	-0.5542	1.39519	0.000558076
0.51404	-9.282	1.23695	0.000494779
0.51408	19.94	1.08046	0.000432183
0.51412	15.28	0.925645	0.000370258
0.51416	12.28	0.772444	0.000308978
0.5142	30.17	0.620801	0.00024832
0.51424	13.84	0.470673	0.000188269
0.51428	0.4573	0.322036	0.000128814
0.51432	-6.421	0.174873	6.99493e-05
0.51436	-30.84	0.029172	1.16688e-05
0.5144	-24.8	-0.115091	-4.60364e-05
0.51444	-23.73	-0.257956	-0.000103182
0.51448	-31.59	-0.399483	-0.000159793
0.51452	-21.65	-0.539755	-0.000215902
0.51456	9.417	-0.678875	-0.00027155
0.5146	8.29	-0.816956	-0.000326782
0.51464	28.23	-0.954111	-0.000381644
0.51468	2.018	-1.09044	-0.000436177
0.51472	5.977	-1.22604	-0.000490417
0.51476	4.243	-1.36099	-0.000544397
0.5148	-10.93	-1.49537	-0.000598148
0.51484	-17.69	-1.62925	-0.000651699
0.51488	-22.35	-1.76271	-0.000705083
0.51492	-25.87	-1.89585	-0.000758339
0.51496	-24.63	-2.02877	-0.000811509
0.515	-1.19	-2.16161	-0.000864645
0.51504	-1.392	-2.29451	-0.000917803
0.51508	3.116	-2.4276	-0.000971041
0.51512	12.88	-2.56104	-0.00102442
0.51516	21.47	-2.69496	-0.00107798
0.5152	6.758	-2.82949	-0.00113179
0.51524	7.105	-2.96473	-0.00118589
0.51528	5.11	-3.1008	-0.00124032
0.51532	-9.542	-3.23778	-0.00129511
0.51536	-8.589	-3.37576	-0.00135031
0.5154	-25.78	-3.51485	-0.00140594
0.51544	-27.14	-3.65512	-0.00146205
0.51548	-16.02	-3.79671	-0.00151868
0.51552	-18.79	-3.93974	-0.0015759
0.51556	7.856	-4.08435	-0.00163374
0.5156	15.28	-4.23069	-0.00169228
0.51564	22.71	-4.3789	-0.00175156
0.51568	33.26	-4.5291	-0.00181164
0.51572	27.57	-4.68141	-0.00187256
0.51576	22.51	-4.83589	-0.00193435
0.5158	10.66	-4.99259	-0.00199704
0.51584	-7.837	-5.15156	-0.00206062
0.51588	-3.271	-5.3128	-0.00212512
0.51592	-1.392	-5.47633	-0.00219053
0.51596	-12	-5.64217	-0.00225687
0.516	-13.59	-5.81033	-0.00232413
0.51604	-28.76	-5.98083	-0.00239233
0.51608	2.943	-6.15368	-0.00246147
0.51612	-3.993	-6.32893	-0.00253157
0.51616	-20.67	-6.50661	-0.00260265
0.5162	-10.03	-6.68676	-0.0026747
0.51624	-12.26	-6.86941	-0.00274776
0.51628	14.76	-7.05461	-0.00282184
0.51632	-6.248	-7.24241	-0.00289696
0.51636	4.879	-7.43283	-0.00297313
0.5164	-10.44	-7.62592	-0.00305037
0.51644	-9.716	-7.82169	-0.00312868
0.51648	9.908	-8.02017	-0.00320807
0.51652	-4.745	-8.22138	-0.00328855
0.51656	16.84	-8.42533	-0.00337013
0.5166	4.012	-8.63203	-0.00345281
0.51664	7.914	-8.84146	-0.00353658
0.51668	-2.722	-9.05359	-0.00362144
0.51672	-42.92	-9.26841	-0.00370736
0.51676	-8.849	-9.48586	-0.00379435
0.5168	-21.74	-9.70594	-0.00388238
0.51684	-15.64	-9.92863	-0.00397145
0.51688	-6.884	-10.1539	-0.00406157
0.51692	-9.803	-10.3818	-0.00415272
0.51696	-15.5	-10.6123	-0.00424491
0.517	-4.629	-10.8454	-0.00433814
0.51704	-7.606	-11.081	-0.0044324
0.51708	4.272	-11.3192	-0.0045277
0.51712	-10	-11.5601	-0.00462402
0.51716	-6.508	-11.8034	-0.00472137
0.5172	-5.323	-12.0493	-0.00481973
0.51724	-3.3	-12.2977	-0.00491909
0.51728	-18.79	-12.5486	-0.00501944
0.51732	-32.63	-12.8019	-0.00512076
0.51736	-25.61	-13.0576	-0.00522304
0.5174	-18.27	-13.3157	-0.00532628
0.51744	2.018	-13.5762	-0.00543048
0.51748	-6.074	-13.839	-0.00553561
0.51752	-8.184	-14.1042	-0.00564169
0.51756	-4.976	-14.3717	-0.0057487
0.5176	2.105	-14.6416	-0.00585663
0.51764	3.983	-14.9136	-0.00596546
0.51768	-0.9588	-15.1879	-0.00607518
0.51772	8.983	-15.4644	-0.00618575
0.51776	4.821	-15.7429	-0.00629716
0.5178	-28.27	-16.0234	-0.00640935
0.51784	-15.24	-16.3057	-0.00652229
0.51788	-28.56	-16.5898	-0.00663593
0.51792	-18.1	-16.8756	-0.00675024
0.51796	-19.11	-17.1629	-0.00686517
0.518	-1.97	-17.4517	-0.00698069
0.51804	12.86	-17.7419	-0.00709676
0.51808	1.642	-18.0333	-0.00721333
0.51812	8.116	-18.3259	-0.00733035
0.51816	4.619	-18.6194	-0.00744777
0.5182	6.238	-18.9138	-0.00756551
0.51824	-8.675	-19.2088	-0.0076835
0.51828	-18.47	-19.5042	-0.00780166
0.51832	-11.51	-19.7998	-0.00791991
0.51836	1.874	-20.0954	-0.00803815
0.5184	-10.93	-20.3907	-0.00815629
0.51844	-3.329	-20.6856	-0.00827424
0.51848	-9.687	-20.9798	-0.0083919
0.51852	-19.89	-21.2729	-0.00850916
0.51856	3.723	-21.5648	-0.00862591
0.5186	-7.982	-21.8551	-0.00874204
0.51864	-2.982	-22.1436	-0.00885743
0.51868	0.1683	-22.4299	-0.00897196
0.51872	-11.02	-22.7137	-0.0090855
0.51876	-71.22	-22.9948	-0.0091979
0.5188	-5.988	-23.2726	-0.00930905
0.51884	-20.5	-23.547	-0.0094188
0.51888	-64.74	-23.8176	-0.00952703
0.51892	-67.49	-24.084	-0.00963361
0.51896	-34.83	-24.3461	-0.00973842
0.519	-43.5	-24.6034	-0.00984136
0.51904	-24.86	-24.8558	-0.00994233
0.51908	-18.5	-25.103	-0.0100412
0.51912	2.538	-25.3449	-0.0101379
0.51916	-32.69	-25.581	-0.0102324
0.5192	-7.866	-25.8112	-0.0103245
0.51924	-51.3	-26.0353	-0.0104141
0.51928	-83.1	-26.2529	-0.0105011
0.51932	-7.23	-26.4638	-0.0105855
0.51936	-33.62	-26.6678	-0.0106671
0.5194	-52.63	-26.8647	-0.0107459
0.51944	-38.59	-27.0542	-0.0108217
0.51948	-35.32	-27.2362	-0.0108945
0.51952	-56.1	-27.4105	-0.0109642
0.51956	-45.06	-27.5769	-0.0110308
0.5196	-42.03	-27.7353	-0.0110941
0.51964	-37.29	-27.8855	-0.0111542
0.51968	-46.65	-28.0273	-0.0112109
0.51972	-75.03	-28.1607	-0.0112643
0.51976	-25.96	-28.2856	-0.0113143
0.5198	-41.62	-28.4019	-0.0113608
0.51984	-33.76	-28.5096	-0.0114038
0.51988	-42.66	-28.6084	-0.0114434
0.51992	-42.87	-28.6985	-0.0114794
0.51996	-0.6409	-28.7798	-0.0115119
0.52	-16.57	-28.8523	-0.0115409
0.52004	-36.77	-28.9158	-0.0115663
0.52008	-56.19	-28.9703	-0.0115881
0.52012	-26.22	-29.0158	-0.0116063
0.52016	-50.55	-29.0523	-0.0116209
0.5202	-68.07	-29.0797	-0.0116319
0.52024	-65.5	-29.098	-0.0116392
0.52028	-64.77	-29.1072	-0.0116429
0.52032	-19.43	-29.1074	-0.0116429
0.52036	-27.09	-29.0985	-0.0116394
0.5204	-28.62	-29.0808	-0.0116323
0.52044	-24.14	-29.0542	-0.0116217
0.52048	-30.93	-29.0189	-0.0116076
0.52052	-23.88	-28.9748	-0.0115899
0.52056	-32.75	-28.9221	-0.0115688
0.5206	-23.99	-28.8607	-0.0115443
0.52064	5.746	-28.7908	-0.0115163
0.52068	-37.98	-28.7124	-0.011485
0.52072	-51.56	-28.6256	-0.0114502
0.52076	-65.5	-28.5303	-0.0114121
0.5208	-71.8	-28.4267	-0.0113707
0.52084	-22.17	-28.3148	-0.0113259
0.52088	-27.14	-28.1948	-0.0112779
0.52092	-43.24	-28.0667	-0.0112267
0.52096	-39.34	-27.9307	-0.0111723
0.521	-33.07	-27.7868	-0.0111147
0.52104	-21.19	-27.6354	-0.0110541
0.52108	-31.59	-27.4763	-0.0109905
0.52112	-17	-27.3099	-0.010924
0.52116	-23.73	-27.1363	-0.0108545
0.5212	0.6597	-26.9555	-0.0107822
0.52124	-59.02	-26.7678	-0.0107071
0.52128	-68.04	-26.5731	-0.0106293
0.52132	-33.01	-26.3718	-0.0105487
0.52136	-21.05	-26.1638	-0.0104655
0.5214	-30.78	-25.9494	-0.0103798
0.52144	-22.92	-25.7288	-0.0102915
0.52148	-32.35	-25.5021	-0.0102008
0.52152	-35.21	-25.2695	-0.0101078
0.52156	-25.21	-25.0312	-0.0100125
0.5216	-24.95	-24.7873	-0.00991493
0.52164	15.43	-24.5381	-0.00981524
0.52168	-13.73	-24.2837	-0.00971347
0.52172	-13.07	-24.0242	-0.00960969
0.52176	-45.18	-23.7599	-0.00950395
0.5218	-56.25	-23.4908	-0.00939631
0.52184	-48.76	-23.2171	-0.00928684
0.52188	-38.76	-22.939	-0.00917559
0.52192	-30.12	-22.6567	-0.00906267
0.52196	-18.21	-22.3703	-0.00894813
0.522	-12.2	-22.0802	-0.00883208
0.52204	-17.75	-21.7865	-0.00871459
0.52208	-30.67	-21.4894	-0.00859574
0.52212	-19.4	-21.1891	-0.00847563
0.52216	-8.675	-20.8858	-0.00835434
0.5222	-14.17	-20.5798	-0.00823194
0.52224	-17.14	-20.2713	-0.00810851
0.52228	-10.12	-19.9604	-0.00798415
0.52232	-10.24	-19.6473	-0.00785891
0.52236	-11.19	-19.3322	-0.00773287
0.5224	5.66	-19.0153	-0.00760611
0.52244	1.556	-18.6967	-0.00747869
0.52248	-2.808	-18.3767	-0.00735066
0.52252	-8.762	-18.0552	-0.00722209
0.52256	-28.94	-17.7325	-0.00709301
0.5226	-24.11	-17.4087	-0.00696348
0.52264	-42.69	-17.0839	-0.00683355
0.52268	-21.8	-16.7582	-0.00670327
0.52272	-19.08	-16.4317	-0.00657269
0.52276	-24.43	-16.1047	-0.00644187
0.5228	-18.3	-15.7772	-0.00631087
0.52284	-15.12	-15.4494	-0.00617977
0.52288	-9.456	-15.1215	-0.00604862
0.52292	-23.65	-14.7937	-0.00591748
0.52296	6.266	-14.4661	-0.00578643
0.523	-21.8	-14.1388	-0.00565552
0.52304	-3.936	-13.812	-0.00552481
0.52308	-13.68	-13.4859	-0.00539437
0.52312	2.943	-13.1606	-0.00526426
0.52316	-6.334	-12.8363	-0.00513452
0.5232	-9.398	-12.513	-0.00500522
0.52324	3.492	-12.191	-0.0048764
0.52328	-7.49	-11.8703	-0.00474812
0.52332	-10.29	-11.5511	-0.00462042
0.52336	-1.19	-11.2334	-0.00449334
0.5234	7.625	-10.9173	-0.00436693
0.52344	9.764	-10.6031	-0.00424122
0.52348	-10.5	-10.2906	-0.00411625
0.52352	-11.54	-9.98009	-0.00399204
0.52356	-15.41	-9.67155	-0.00386862
0.5236	3.087	-9.36506	-0.00374602
0.52364	-12.98	-9.06068	-0.00362427
0.52368	7.683	-8.75849	-0.0035034
0.52372	-16.05	-8.45854	-0.00338341
0.52376	9.677	-8.16088	-0.00326435
0.5238	-13.96	-7.86558	-0.00314623
0.52384	15.54	-7.57268	-0.00302907
0.52388	-23.13	-7.28222	-0.00291289
0.52392	9.59	-6.99425	-0.0027977
0.52396	-2.028	-6.70878	-0.00268351
0.524	-4.254	-6.42587	-0.00257035
0.52404	17.36	-6.14552	-0.00245821
0.52408	-34.37	-5.86776	-0.00234711
0.52412	5.717	-5.59261	-0.00223705
0.52416	-2.664	-5.32009	-0.00212804
0.5242	-13.16	-5.0502	-0.00202008
0.52424	-8.386	-4.78298	-0.00191319
0.52428	0.8909	-4.51845	-0.00180738
0.52432	11.09	-4.25661	-0.00170264
0.52436	8.376	-3.9975	-0.001599
0.5244	2.509	-3.74112	-0.00149645
0.52444	1.382	-3.48746	-0.00139499
0.52448	-6.768	-3.23654	-0.00129461
0.52452	-0.3808	-2.98832	-0.00119533
0.52456	-14.51	-2.74281	-0.00109712
0.5246	-22.52	-2.5	-0.001
0.52464	-4.109	-2.25989	-0.000903958
0.52468	8.925	-2.0225	-0.000808998
0.52472	3.868	-1.78782	-0.000715128
0.52476	-8.386	-1.55588	-0.00062235
0.5248	-3.993	-1.32667	-0.000530669
0.52484	-7.462	-1.10022	-0.000440087
0.52488	12.48	-0.87652	-0.000350608
0.52492	22.91	-0.655594	-0.000262238
0.52496	-3.965	-0.437439	-0.000174976
0.525	2.625	-0.222051	-8.88202e-05
0.52504	12.6	-0.00941523	-3.76609e-06
0.52508	-12.63	0.200482	8.01929e-05
0.52512	-4.629	0.407659	0.000163063
0.52516	1.151	0.612129	0.000244852
0.5252	0.1972	0.813904	0.000325562
0.52524	15.72	1.01299	0.000405198
0.52528	-6.074	1.20941	0.000483765
0.52532	21.01	1.40318	0.00056127
0.52536	17.34	1.59431	0.000637722
0.5254	9.128	1.78283	0.000713133
0.52544	8.781	1.9688	0.00078752
0.52548	4.186	2.15226	0.000860903
0.52552	14.27	2.33326	0.000933303
0.52556	-2.23	2.51186	0.00100475
0.5256	4.417	2.68814	0.00107525
0.52564	10.51	2.86214	0.00114486
0.52568	-1.046	3.03395	0.00121358
0.52572	7.336	3.20362	0.00128145
0.52576	15.54	3.37124	0.0013485
0.5258	10.98	3.53687	0.00141475
0.52584	25.34	3.70059	0.00148024
0.52588	0.1394	3.8625	0.001545
0.52592	17.88	4.02269	0.00160908
0.52596	4.446	4.18127	0.00167251
0.526	10.05	4.33836	0.00173534
0.52604	-1.161	4.49406	0.00179762
0.52608	10.95	4.6485	0.0018594
0.52612	14.07	4.80179	0.00192072
0.52616	5.746	4.95405	0.00198162
0.5262	-12.72	5.10541	0.00204216
0.52624	12.86	5.25598	0.00210239
0.52628	6.873	5.40589	0.00216236
0.52632	-8.155	5.55527	0.00222211
0.52636	0.6308	5.70421	0.00228168
0.5264	-7.519	5.85284	0.00234114
0.52644	7.567	6.00126	0.0024005
0.52648	3.347	6.14956	0.00245982
0.52652	9.966	6.29784	0.00251914
0.52656	-9.658	6.4462	0.00257848
0.5266	12.83	6.59472	0.00263789
0.52664	2.076	6.7435	0.0026974
0.52668	-4.196	6.89262	0.00275705
0.52672	3.203	7.04216	0.00281687
0.52676	2.769	7.1922	0.00287688
0.5268	3.521	7.34281	0.00293713
0.52684	16.58	7.49406	0.00299763
0.52688	-4.745	7.64602	0.00305841
0.52692	5.168	7.79875	0.0031195
0.52696	16.67	7.95232	0.00318093
0.527	1.267	8.10679	0.00324272
0.52704	3.463	8.26223	0.00330489
0.52708	-7.722	8.4187	0.00336748
0.52712	16.58	8.57624	0.0034305
0.52716	12.42	8.73492	0.00349397
0.5272	-10.26	8.89478	0.00355791
0.52724	14.04	9.05587	0.00362235
0.52728	-1.941	9.21824	0.00368729
0.52732	6.064	9.38191	0.00375277
0.52736	2.885	9.54694	0.00381877
0.5274	-4.629	9.71334	0.00388533
0.52744	13.55	9.88113	0.00395245
0.52748	4.966	10.0503	0.00402014
0.52752	9.503	10.221	0.0040884
0.52756	-2.808	10.3931	0.00415723
0.5276	-7.606	10.5666	0.00422665
0.52764	-14.22	10.7416	0.00429664
0.52768	-1.363	10.918	0.00436721
0.52772	-7.259	11.0958	0.00443833
0.52776	9.677	11.275	0.00451
0.5278	1.267	11.4555	0.00458219
0.52784	-3.589	11.6372	0.00465487
0.52788	11.99	11.82	0.00472801
0.52792	-6.912	12.004	0.00480158
0.52796	-1.19	12.1889	0.00487555
0.528	-4.369	12.3747	0.00494988
0.52804	10.83	12.5613	0.00502452
0.52808	-6.277	12.7486	0.00509943
0.52812	10.05	12.9364	0.00517455
0.52816	-0.2074	13.1246	0.00524983
0.5282	1.382	13.313	0.00532522
0.52824	0.9198	13.5016	0.00540064
0.52828	-5.872	13.6901	0.00547603
0.52832	-0.5542	13.8783	0.00555133
0.52836	2.249	14.0661	0.00562645
0.5284	13.81	14.2533	0.00570132
0.52844	13.03	14.4396	0.00577586
0.52848	1.382	14.6249	0.00584997
0.52852	6.816	14.8089	0.00592357
0.52856	-23.56	14.9914	0.00599657
0.5286	8.752	15.1722	0.00606888
0.52864	-2.519	15.351	0.00614039
0.52868	-2.202	15.5275	0.00621099
0.52872	15.75	15.7014	0.00628057
0.52876	-1.739	15.8726	0.00634902
0.5288	17.86	16.0405	0.00641621
0.52884	21.61	16.2051	0.00648202
0.52888	23.12	16.3658	0.00654633
0.52892	30.95	16.5225	0.00660901
0.52896	13.64	16.6749	0.00666994
0.529	21.21	16.8225	0.00672901
0.52904	37.08	16.9653	0.0067861
0.52908	120	17.1028	0.0068411
0.52912	7.249	17.2348	0.00689391
0.52916	12.57	17.3611	0.00694444
0.5292	26.24	17.4815	0.00699261
0.52924	43.69	17.5959	0.00703835
0.52928	14.99	17.7039	0.00708158
0.52932	5.717	17.8056	0.00712223
0.52936	50.25	17.9006	0.00716022
0.5294	63.52	17.9888	0.0071955
0.52944	70.77	18.07	0.00722801
0.52948	22.39	18.1442	0.00725769
0.52952	0.6019	18.2113	0.00728451
0.52956	36.61	18.2711	0.00730843
0.5296	61.24	18.3236	0.00732944
0.52964	67.25	18.3688	0.00734751
0.52968	22.94	18.4065	0.00736261
0.52972	18.12	18.4369	0.00737476
0.52976	36.01	18.4599	0.00738395
0.5298	47.74	18.4755	0.00739018
0.52984	57.33	18.4837	0.00739348
0.52988	6.093	18.4846	0.00739385
0.52992	25.6	18.4783	0.00739134
0.52996	11.32	18.4649	0.00738595
0.53	17.65	18.4443	0.00737774
0.53004	17.1	18.4168	0.00736671
0.53008	34.39	18.3823	0.00735291
0.53012	33.98	18.3409	0.00733636
0.53016	13.95	18.2927	0.00731709
0.5302	6.527	18.2378	0.00729514
0.53024	9.099	18.1764	0.00727054
0.53028	12.86	18.1083	0.00724333
0.53032	13.93	18.0338	0.00721354
0.53036	10.69	17.953	0.00718119
0.5304	5.746	17.8658	0.00714632
0.53044	-4.629	17.7723	0.00710893
0.53048	5.053	17.6727	0.00706906
0.53052	25.6	17.5668	0.00702672
0.53056	11.47	17.4548	0.00698192
0.5306	-1.652	17.3367	0.00693466
0.53064	4.937	17.2124	0.00688496
0.53068	5.949	17.082	0.00683282
0.53072	16.27	16.9456	0.00677823
0.53076	12.13	16.803	0.0067212
0.5308	-3.704	16.6543	0.00666172
0.53084	35.11	16.4994	0.00659977
0.53088	171.1	16.3384	0.00653537
0.53092	-6.826	16.1712	0.0064685
0.53096	14.99	15.998	0.0063992
0.531	20.34	15.8187	0.0063275
0.53104	10.66	15.6336	0.00625344
0.53108	38.35	15.4426	0.00617705
0.53112	25.11	15.246	0.00609838
0.53116	5.717	15.0437	0.00601747
0.5312	45.72	14.8359	0.00593436
0.53124	26.9	14.6227	0.0058491
0.53128	28.9	14.4043	0.00576174
0.53132	17.31	14.1808	0.00567234
0.53136	27.34	13.9524	0.00558096
0.5314	23.58	13.7192	0.00548767
0.53144	11.56	13.4813	0.00539253
0.53148	6.411	13.239	0.00529561
0.53152	24.13	12.9925	0.00519699
0.53156	-15.7	12.7418	0.00509674
0.5316	3.087	12.4873	0.00499491
0.53164	6.989	12.229	0.00489158
0.53168	13.98	11.967	0.00478681
0.53172	37.83	11.7016	0.00468065
0.53176	8.232	11.4329	0.00457318
0.5318	-2.808	11.1611	0.00446444
0.53184	-7.115	10.8863	0.00435451
0.53188	14.45	10.6086	0.00424345
0.53192	2.683	10.3283	0.00413131
0.53196	41.81	10.0454	0.00401816
0.532	26.24	9.76012	0.00390405
0.53204	9.85	9.4726	0.00378904
0.53208	-0.7854	9.18301	0.0036732
0.53212	6.7	8.89152	0.00355661
0.53216	-4.34	8.59831	0.00343932
0.5322	10.6	8.30354	0.00332141
0.53224	2.423	8.00736	0.00320294
0.53228	5.746	7.70993	0.00308397
0.53232	16.87	7.41141	0.00296457
0.53236	1.787	7.11195	0.00284478
0.5324	-15.55	6.81171	0.00272468
0.53244	14.42	6.51083	0.00260433
0.53248	5.717	6.20946	0.00248379
0.53252	24.16	5.90775	0.0023631
0.53256	18	5.60583	0.00224233
0.5326	9.764	5.30387	0.00212155
0.53264	24.5	5.00202	0.00200081
0.53268	13.23	4.70048	0.00188019
0.53272	-3.791	4.39941	0.00175976
0.53276	0.6886	4.09901	0.0016396
0.5328	-4.109	3.79947	0.00151979
0.53284	-4.456	3.50097	0.00140039
0.53288	-3.647	3.20369	0.00128147
0.53292	-16.22	2.90779	0.00116312
0.53296	13.64	2.61346	0.00104538
0.533	-9.86	2.32083	0.000928332
0.53304	-24.37	2.03007	0.000812027
0.53308	-3.936	1.74131	0.000696526
0.53312	7.654	1.45471	0.000581882
0.53316	15.69	1.17037	0.000468147
0.5332	10.17	0.888432	0.000355373
0.53324	0.4284	0.609036	0.000243614
0.53328	-1.046	0.332325	0.00013293
0.53332	-0.1496	0.0584445	2.33778e-05
0.53336	-0.3519	-0.212458	-8.49831e-05
0.5334	-20.78	-0.480237	-0.000192095
0.53344	-24.17	-0.744754	-0.000297902
0.53348	-36.19	-1.00588	-0.000402353
0.53352	14.73	-1.26351	-0.000505405
0.53356	18	-1.51755	-0.000607019
0.5336	-9.051	-1.76789	-0.000707158
0.53364	26.58	-2.01445	-0.000805779
0.53368	-1.595	-2.25709	-0.000902837
0.53372	5.053	-2.49571	-0.000998284
0.53376	-0.005073	-2.73017	-0.00109207
0.5338	-22.69	-2.96034	-0.00118414
0.53384	12.08	-3.1861	-0.00127444
0.53388	-2.751	-3.4073	-0.00136292
0.53392	-13.44	-3.62383	-0.00144953
0.53396	-2.664	-3.83554	-0.00153422
0.534	-3.907	-4.04232	-0.00161693
0.53404	6.122	-4.24403	-0.00169761
0.53408	-19.86	-4.44055	-0.00177622
0.53412	-1.71	-4.63175	-0.0018527
0.53416	20.92	-4.8175	-0.001927
0.5342	-0.5831	-4.99766	-0.00199907
0.53424	-14.14	-5.17211	-0.00206884
0.53428	0.3417	-5.34069	-0.00213627
0.53432	-5.901	-5.50325	-0.0022013
0.53436	-27.58	-5.65966	-0.00226386
0.5344	-39.4	-5.80977	-0.00232391
0.53444	-66.74	-5.95346	-0.00238138
0.53448	-53.79	-6.09064	-0.00243626
0.53452	-52.75	-6.22126	-0.0024885
0.53456	-62.03	-6.34529	-0.00253812
0.5346	-50.55	-6.46279	-0.00258511
0.53464	-34.69	-6.5738	-0.00262952
0.53468	-47.26	-6.67845	-0.00267138
0.53472	-60.61	-6.77685	-0.00271074
0.53476	-36.94	-6.8692	-0.00274768
0.5348	-32.98	-6.95568	-0.00278227
0.53484	-44.77	-7.03654	-0.00281462
0.53488	-43.3	-7.11204	-0.00284481
0.53492	-29.86	-7.18246	-0.00287298
0.53496	-23.79	-7.24811	-0.00289925
0.535	-19.31	-7.30935	-0.00292374
0.53504	-6.479	-7.3665	-0.0029466
0.53508	15.6	-7.41994	-0.00296798
0.53512	35.98	-7.47	-0.002988
0.53516	-5.872	-7.51704	-0.00300682
0.5352	15.14	-7.56136	-0.00302454
0.53524	18.4	-7.60326	-0.0030413
0.53528	3.492	-7.64303	-0.00305721
0.53532	-16.94	-7.68094	-0.00307238
0.53536	-22.23	-7.71725	-0.0030869
0.5354	-19.14	-7.75222	-0.00310089
0.53544	-24.17	-7.78614	-0.00311445
0.53548	-14.57	-7.81927	-0.00312771
0.53552	-15.09	-7.85193	-0.00314077
0.53556	11.84	-7.88441	-0.00315376
0.5356	31.58	-7.917	-0.0031668
0.53564	26.24	-7.95	-0.00318
0.53568	33.84	-7.98367	-0.00319347
0.53572	20.23	-8.01824	-0.00320729
0.53576	20.43	-8.0539	-0.00322156
0.5358	17.62	-8.09083	-0.00323633
0.53584	-13.76	-8.12918	-0.00325167
0.53588	0.3417	-8.1691	-0.00326764
0.53592	-41.39	-8.21072	-0.00328429
0.53596	-39.57	-8.25416	-0.00330167
0.536	-24.92	-8.2996	-0.00331984
0.53604	-10.99	-8.3472	-0.00333888
0.53608	-12.87	-8.39715	-0.00335886
0.53612	-5.93	-8.44965	-0.00337986
0.53616	9.677	-8.5049	-0.00340196
0.5362	29.24	-8.56308	-0.00342523
0.53624	29.62	-8.62437	-0.00344975
0.53628	12.42	-8.68892	-0.00347557
0.53632	11.24	-8.75685	-0.00350274
0.53636	-32.81	-8.82829	-0.00353131
0.5364	-23.59	-8.90331	-0.00356132
0.53644	-16.68	-8.98202	-0.00359281
0.53648	-13.79	-9.06455	-0.00362582
0.53652	-20.47	-9.15101	-0.0036604
0.53656	-0.005073	-9.24153	-0.00369661
0.5366	0.8042	-9.33624	-0.0037345
0.53664	-4.022	-9.43527	-0.00377411
0.53668	8.087	-9.53875	-0.0038155
0.53672	8.752	-9.64678	-0.00385871
0.53676	6.382	-9.75947	-0.00390379
0.5368	-4.543	-9.87691	-0.00395076
0.53684	-8.936	-9.99916	-0.00399967
0.53688	6.816	-10.1263	-0.00405053
0.53692	-10.29	-10.2584	-0.00410337
0.53696	-15.41	-10.3955	-0.00415822
0.537	-23.62	-10.5377	-0.00421509
0.53704	-4.716	-10.6851	-0.00427403
0.53708	-6.652	-10.8376	-0.00433504
0.53712	-4.629	-10.9954	-0.00439815
0.53716	15.2	-11.1585	-0.00446339
0.5372	15.63	-11.3269	-0.00453078
0.53724	27.19	-11.5008	-0.00460033
0.53728	5.342	-11.6801	-0.00467204
0.53732	2.22	-11.8648	-0.00474591
0.53736	-4.947	-12.0548	-0.00482193
0.5374	8.492	-12.2502	-0.00490007
0.53744	-19.69	-12.4508	-0.00498031
0.53748	-5.121	-12.6566	-0.00506264
0.53752	4.908	-12.8676	-0.00514702
0.53756	9.59	-13.0836	-0.00523343
0.5376	5.082	-13.3046	-0.00532182
0.53764	-15.26	-13.5304	-0.00541217
0.53768	2.018	-13.761	-0.00550441
0.53772	9.185	-13.9963	-0.00559851
0.53776	1.816	-14.236	-0.00569442
0.5378	-0.4964	-14.4802	-0.00579207
0.53784	-4.138	-14.7285	-0.00589139
0.53788	9.764	-14.9808	-0.00599233
0.53792	-12.78	-15.237	-0.0060948
0.53796	-9.456	-15.4968	-0.00619872
0.538	-14.4	-15.7601	-0.00630402
0.53804	-16.1	-16.0265	-0.00641061
0.53808	-16.94	-16.296	-0.00651841
0.53812	-2.288	-16.5683	-0.00662732
0.53816	4.128	-16.8432	-0.00673728
0.5382	3.608	-17.1204	-0.00684817
0.53824	-6.681	-17.3998	-0.00695992
0.53828	-9.831	-17.681	-0.00707241
0.53832	10.25	-17.9639	-0.00718555
0.53836	-16.57	-18.248	-0.00729921
0.5384	-22.23	-18.5332	-0.00741329
0.53844	-12.63	-18.8192	-0.00752766
0.53848	-35.84	-19.1055	-0.00764222
0.53852	-20.09	-19.3921	-0.00775683
0.53856	-9.947	-19.6785	-0.00787139
0.5386	-12	-19.9645	-0.00798578
0.53864	2.769	-20.2497	-0.00809988
0.53868	1.902	-20.5339	-0.00821358
0.53872	-15.9	-20.8168	-0.00832673
0.53876	1.006	-21.098	-0.00843922
0.5388	1.816	-21.3772	-0.00855089
0.53884	0.4862	-21.654	-0.00866162
0.53888	-46.39	-21.9281	-0.00877124
0.53892	-90.78	-22.199	-0.00887961
0.53896	-35.64	-22.4664	-0.00898657
0.539	-39.86	-22.73	-0.00909201
0.53904	-40.7	-22.9895	-0.00919578
0.53908	-74.37	-23.2444	-0.00929778
0.53912	-45.35	-23.4947	-0.00939789
0.53916	0.4573	-23.7401	-0.00949602
0.5392	18.43	-23.9802	-0.00959208
0.53924	-8.04	-24.2149	-0.00968595
0.53928	-36.42	-24.4439	-0.00977755
0.53932	-82.26	-24.6669	-0.00986675
0.53936	-11.42	-24.8836	-0.00995345
0.5394	-46.88	-25.0939	-0.0100375
0.53944	-34.25	-25.2974	-0.010119
0.53948	-48.93	-25.4939	-0.0101976
0.53952	-29.6	-25.6833	-0.0102733
0.53956	-43.82	-25.8653	-0.0103461
0.5396	-17.98	-26.0398	-0.0104159
0.53964	-86.22	-26.2065	-0.0104826
0.53968	-51.39	-26.3652	-0.0105461
0.53972	1.613	-26.5159	-0.0106064
0.53976	-52.52	-26.6585	-0.0106634
0.5398	-25.47	-26.7926	-0.0107171
0.53984	-57.08	-26.9184	-0.0107674
0.53988	-1.219	-27.0356	-0.0108142
0.53992	-63.99	-27.1441	-0.0108577
0.53996	-51.94	-27.2439	-0.0108976
0.54	-61.62	-27.3348	-0.0109339
0.54004	-23.1	-27.4169	-0.0109668
0.54008	-46.54	-27.49	-0.010996
0.54012	-42.92	-27.554	-0.0110216
0.54016	-25.12	-27.6091	-0.0110436
0.5402	-8.329	-27.6552	-0.0110621
0.54024	-23.01	-27.6922	-0.0110769
0.54028	-24.05	-27.7201	-0.011088
0.54032	-39.4	-27.739	-0.0110956
0.54036	-75.47	-27.7487	-0.0110995
0.5404	-47.14	-27.7492	-0.0110997
0.54044	-7.866	-27.7407	-0.0110963
0.54048	-25.47	-27.723	-0.0110892
0.54052	-48.36	-27.6962	-0.0110785
0.54056	-77.03	-27.6603	-0.0110641
0.5406	-50.32	-27.6153	-0.0110461
0.54064	-39.8	-27.5614	-0.0110246
0.54068	-45.32	-27.4986	-0.0109994
0.54072	8.434	-27.427	-0.0109708
0.54076	-0.3808	-27.3466	-0.0109387
0.5408	-11.19	-27.2577	-0.0109031
0.54084	-33.99	-27.1602	-0.0108641
0.54088	-57.43	-27.0542	-0.0108217
0.54092	-72.86	-26.9397	-0.0107759
0.54096	-15.26	-26.8169	-0.0107268
0.541	-12.69	-26.6859	-0.0106744
0.54104	-19.54	-26.5467	-0.0106187
0.54108	-36.07	-26.3994	-0.0105598
0.54112	-52.87	-26.2442	-0.0104977
0.54116	-28.73	-26.0811	-0.0104324
0.5412	-32.66	-25.9103	-0.0103641
0.54124	5.313	-25.7319	-0.0102927
0.54128	-3.242	-25.5459	-0.0102184
0.54132	-34.51	-25.3526	-0.010141
0.54136	-40.21	-25.1519	-0.0100608
0.5414	-21.02	-24.9441	-0.00997762
0.54144	-51.51	-24.7291	-0.00989163
0.54148	-40.61	-24.5071	-0.00980284
0.54152	-56.56	-24.2782	-0.00971129
0.54156	-55.15	-24.0426	-0.00961704
0.5416	-71.42	-23.8004	-0.00952016
0.54164	-30	-23.5518	-0.00942073
0.54168	-25.21	-23.2971	-0.00931882
0.54172	-28.59	-23.0363	-0.00921454
0.54176	-4.803	-22.7699	-0.00910797
0.5418	-3.126	-22.498	-0.00899921
0.54184	-13.47	-22.2209	-0.00888835
0.54188	-6.768	-21.9387	-0.00877547
0.54192	-51.16	-21.6516	-0.00866065
0.54196	-35.55	-21.3599	-0.00854397
0.542	-39.28	-21.0638	-0.00842552
0.54204	-36.22	-20.7635	-0.00830539
0.54208	-32.49	-20.4592	-0.00818367
0.54212	-16.1	-20.1512	-0.00806047
0.54216	-9.225	-19.8397	-0.00793588
0.5422	-10.03	-19.525	-0.00781
0.54224	-1.999	-19.2074	-0.00768295
0.54228	0.05273	-18.887	-0.0075548
0.54232	8.925	-18.5642	-0.00742567
0.54236	-13.18	-18.239	-0.00729562
0.5424	-28.47	-17.9118	-0.00716474
0.54244	1.469	-17.5827	-0.0070331
0.54248	-9.831	-17.2519	-0.00690078
0.54252	-11.77	-16.9196	-0.00676785
0.54256	-25.93	-16.586	-0.00663438
0.5426	-31.51	-16.2511	-0.00650044
0.54264	-22.23	-15.9153	-0.0063661
0.54268	-9.86	-15.5786	-0.00623144
0.54272	19.97	-15.2413	-0.00609652
0.54276	8.694	-14.9036	-0.00596143
0.5428	4.157	-14.5655	-0.00582622
0.54284	-4.976	-14.2274	-0.00569095
0.54288	-13.42	-13.8892	-0.00555569
0.54292	-17.29	-13.5511	-0.00542046
0.54296	-9.976	-13.2133	-0.00528532
0.543	-3.704	-12.8758	-0.00515033
0.54304	-7.028	-12.5388	-0.00501551
0.54308	-33.13	-12.2023	-0.00488092
0.54312	-19.51	-11.8665	-0.00474661
0.54316	-23.99	-11.5315	-0.00461262
0.5432	-8.618	-11.1975	-0.004479
0.54324	-4.254	-10.8645	-0.0043458
0.54328	6.44	-10.5327	-0.00421309
0.54332	-12.61	-10.2023	-0.00408091
0.54336	12.34	-9.87326	-0.0039493
0.5434	-9.456	-9.54582	-0.00381833
0.54344	0.05273	-9.22004	-0.00368802
0.54348	-3.271	-8.89604	-0.00355842
0.54352	-3.444	-8.5739	-0.00342956
0.54356	-0.4386	-8.25371	-0.00330148
0.5436	-38.93	-7.93556	-0.00317422
0.54364	9.301	-7.61953	-0.00304781
0.54368	0.3417	-7.30572	-0.00292229
0.54372	7.972	-6.99422	-0.00279769
0.54376	20.28	-6.6851	-0.00267404
0.5438	-8.502	-6.37843	-0.00255137
0.54384	0.255	-6.07427	-0.00242971
0.54388	4.764	-5.77267	-0.00230907
0.54392	-10.38	-5.47368	-0.00218947
0.54396	-10.81	-5.17732	-0.00207093
0.544	-15.73	-4.88366	-0.00195346
0.54404	-16.88	-4.59272	-0.00183709
0.54408	7.105	-4.30457	-0.00172183
0.54412	-12.49	-4.01926	-0.0016077
0.54416	8.665	-3.73686	-0.00149474
0.5442	2.596	-3.45741	-0.00138296
0.54424	19.97	-3.18097	-0.00127239
0.54428	28.2	-2.90758	-0.00116303
0.54432	6.295	-2.63727	-0.00105491
0.54436	10.83	-2.37004	-0.000948015
0.5444	6.816	-2.10588	-0.000842353
0.54444	-14.46	-1.84479	-0.000737917
0.54448	-8.762	-1.58675	-0.000634698
0.54452	-8.011	-1.33173	-0.000532692
0.54456	-10	-1.07974	-0.000431894
0.5446	-3.213	-0.830762	-0.000332305
0.54464	-20.52	-0.584812	-0.000233925
0.54468	2.596	-0.341898	-0.000136759
0.54472	19.39	-0.102035	-4.08141e-05
0.54476	11.27	0.134761	5.39042e-05
0.5448	-7.49	0.368482	0.000147393
0.54484	2.249	0.599128	0.000239651
0.54488	34.88	0.826698	0.000330679
0.54492	14.45	1.0512	0.000420481
0.54496	-2.202	1.27266	0.000509065
0.545	-1.855	1.49111	0.000596445
0.54504	-4.311	1.70658	0.000682633
0.54508	5.573	1.91911	0.000767643
0.54512	4.59	2.12872	0.000851488
0.54516	-1.074	2.33545	0.000934178
0.5452	12.54	2.53932	0.00101573
0.54524	16.3	2.74038	0.00109615
0.54528	20.43	2.93865	0.00117546
0.54532	15.72	3.1342	0.00125368
0.54536	29.91	3.32709	0.00133084
0.5454	16.96	3.51739	0.00140696
0.54544	-7.462	3.7052	0.00148208
0.54548	-13.42	3.89061	0.00155624
0.54552	-3.993	4.07372	0.00162949
0.54556	-0.9299	4.25462	0.00170185
0.5456	16.87	4.43338	0.00177335
0.54564	10.98	4.61009	0.00184403
0.54568	14.71	4.78482	0.00191393
0.54572	16.67	4.95767	0.00198307
0.54576	10.05	5.12874	0.0020515
0.5458	10.11	5.29812	0.00211925
0.54584	32.54	5.46594	0.00218637
0.54588	-18.56	5.6323	0.00225292
0.54592	7.914	5.79733	0.00231893
0.54596	-7.23	5.96116	0.00238446
0.546	-12.43	6.12389	0.00244956
0.54604	4.388	6.28564	0.00251426
0.54608	0.3995	6.4465	0.0025786
0.54612	8.665	6.60656	0.00264263
0.54616	14.53	6.76592	0.00270637
0.5462	1.729	6.92465	0.00276986
0.54624	14.79	7.08285	0.00283314
0.54628	8.636	7.24062	0.00289625
0.54632	8.492	7.39805	0.00295922
0.54636	-7.115	7.55523	0.00302209
0.5464	10.4	7.71225	0.0030849
0.54644	0.8331	7.86922	0.00314769
0.54648	-2.924	8.02621	0.00321048
0.54652	5.457	8.1833	0.00327332
0.54656	-5.901	8.34058	0.00333623
0.5466	2.134	8.4981	0.00339924
0.54664	1.411	8.65593	0.00346237
0.54668	26.47	8.81413	0.00352565
0.54672	39.59	8.97275	0.0035891
0.54676	14.65	9.13185	0.00365274
0.5468	0.7753	9.29153	0.00371661
0.54684	18.17	9.45185	0.00378074
0.54688	2.22	9.61293	0.00384517
0.54692	19.88	9.77484	0.00390993
0.54696	-15.15	9.93767	0.00397507
0.547	-14.08	10.1015	0.0040406
0.54704	-6.681	10.2664	0.00410657
0.54708	-22.46	10.4325	0.00417299
0.54712	0.255	10.5997	0.00423989
0.54716	12.45	10.7681	0.00430726
0.5472	-3.531	10.9378	0.00437511
0.54724	9.85	11.1086	0.00444344
0.54728	7.249	11.2806	0.00451225
0.54732	11.56	11.4539	0.00458154
0.54736	10.14	11.6283	0.0046513
0.5474	-5.438	11.8038	0.00472154
0.54744	-3.213	11.9806	0.00479223
0.54748	7.249	12.1584	0.00486338
0.54752	-6.017	12.3374	0.00493496
0.54756	-5.583	12.5174	0.00500696
0.5476	-7.837	12.6984	0.00507936
0.54764	-17.87	12.8803	0.00515213
0.54768	29.82	13.0631	0.00522522
0.54772	33.35	13.2465	0.00529861
0.54776	6.035	13.4306	0.00537224
0.5478	38.84	13.6152	0.00544609
0.54784	7.625	13.8003	0.00552011
0.54788	9.561	13.9857	0.00559429
0.54792	4.07	14.1714	0.00566858
0.54796	0.6597	14.3574	0.00574295
0.548	8.492	14.5435	0.00581738
0.54804	9.475	14.7296	0.00589182
0.54808	-1.421	14.9156	0.00596623
0.54812	11.53	15.1014	0.00604057
0.54816	8.81	15.2869	0.00611478
0.5482	15.28	15.4721	0.00618882
0.54824	0.5729	15.6566	0.00626264
0.54828	12.48	15.8405	0.00633619
0.54832	0.3128	16.0235	0.0064094
0.54836	-0.2363	16.2056	0.00648222
0.5484	18.58	16.3865	0.00655459
0.54844	-12.09	16.5661	0.00662644
0.54848	-0.5253	16.7442	0.00669769
0.54852	0.6019	16.9207	0.00676828
0.54856	-11.42	17.0953	0.00683811
0.5486	3.145	17.2678	0.0069071
0.54864	-7.519	17.4379	0.00697515
0.54868	-5.959	17.6054	0.00704216
0.54872	8.723	17.7701	0.00710802
0.54876	42.77	17.9315	0.00717261
0.5488	30.6	18.0895	0.00723581
0.54884	21.06	18.2438	0.00729751
0.54888	15.08	18.394	0.0073576
0.54892	52.22	18.5399	0.00741596
0.54896	31.38	18.6813	0.00747251
0.549	17.54	18.8178	0.00752712
0.54904	3.261	18.9493	0.00757971
0.54908	59.73	19.0755	0.00763018
0.54912	38.69	19.1961	0.00767844
0.54916	25.28	19.311	0.0077244
0.5492	62.22	19.4199	0.00776797
0.54924	21.67	19.5227	0.00780909
0.54928	49.82	19.6192	0.00784769
0.54932	16.96	19.7093	0.0078837
0.54936	29.1	19.7927	0.00791707
0.5494	34.94	19.8694	0.00794775
0.54944	45.69	19.9392	0.00797568
0.54948	12.71	20.0021	0.00800083
0.54952	13.35	20.0579	0.00802314
0.54956	143.5	20.1065	0.00804259
0.5496	20.4	20.1479	0.00805914
0.54964	62.65	20.182	0.00807278
0.54968	64.85	20.2088	0.00808352
0.54972	39.01	20.2284	0.00809136
0.54976	0.8331	20.2408	0.00809633
0.5498	35.72	20.2462	0.00809846
0.54984	19.71	20.2445	0.00809778
0.54988	17.68	20.2358	0.00809433
0.54992	31.64	20.2203	0.00808812
0.54996	6.729	20.198	0.00807921
0.55	24.56	20.169	0.00806761
0.55004	23.75	20.1334	0.00805337
0.55008	25.89	20.0913	0.00803652
0.55012	9.33	20.0427	0.00801708
0.55016	7.423	19.9877	0.00799509
0.5502	30.34	19.9265	0.00797059
0.55024	37.02	19.859	0.00794361
0.55028	16.76	19.7854	0.00791417
0.55032	16.09	19.7058	0.00788232
0.55036	82.71	19.6202	0.00784808
0.5504	13.95	19.5288	0.00781151
0.55044	14.79	19.4316	0.00777264
0.55048	10.14	19.3289	0.00773154
0.55052	26.47	19.2206	0.00768825
0.55056	12.16	19.1071	0.00764283
0.5506	15.14	18.9883	0.00759532
0.55064	12.1	18.8644	0.00754578
0.55068	12.16	18.7356	0.00749424
0.55072	3.608	18.6019	0.00744077
0.55076	31.06	18.4635	0.0073854
0.5508	13.06	18.3204	0.00732817
0.55084	26.9	18.1728	0.00726912
0.55088	21.38	18.0208	0.00720831
0.55092	21.47	17.8644	0.00714576
0.55096	-0.9588	17.7038	0.00708153
0.551	1.267	17.5391	0.00701565
0.55104	29.53	17.3704	0.00694818
0.55108	0.4573	17.1979	0.00687914
0.55112	5.371	17.0214	0.00680858
0.55116	7.249	16.8413	0.00673652
0.5512	32.48	16.6575	0.006663
0.55124	33.46	16.4701	0.00658804
0.55128	18.46	16.2792	0.00651169
0.55132	8.058	16.0849	0.00643396
0.55136	21.32	15.8873	0.00635491
0.5514	19.62	15.6864	0.00627456
0.55144	-9.196	15.4824	0.00619295
0.55148	42.83	15.2753	0.00611013
0.55152	27.13	15.0653	0.00602611
0.55156	34.85	14.8524	0.00594095
0.5516	38.61	14.6367	0.00585469
0.55164	7.018	14.4184	0.00576737
0.55168	6.642	14.1976	0.00567905
0.55172	39.44	13.9745	0.00558979
0.55176	-3.907	13.7491	0.00549964
0.5518	-10.09	13.5216	0.00540865
0.55184	-7.317	13.2922	0.00531689
0.55188	4.59	13.061	0.0052244
0.55192	18.75	12.8281	0.00513123
0.55196	27.1	12.5935	0.0050374
0.552	51.73	12.3574	0.00494297
0.55204	34.59	12.12	0.00484798
0.55208	24.13	11.8812	0.00475249
0.55212	36.41	11.6414	0.00465656
0.55216	-19.92	11.4007	0.00456026
0.5522	-13.99	11.1592	0.00446367
0.55224	2.509	10.9171	0.00436685
0.55228	12.91	10.6746	0.00426985
0.55232	2.972	10.4319	0.00417274
0.55236	5.602	10.189	0.00407558
0.5524	15.89	9.94604	0.00397842
0.55244	-0.09178	9.70326	0.0038813
0.55248	5.602	9.46074	0.0037843
0.55252	8.723	9.21862	0.00368745
0.55256	21.73	8.97701	0.0035908
0.5526	20.14	8.73606	0.00349442
0.55264	-19.63	8.49588	0.00339835
0.55268	-0.1207	8.25663	0.00330265
0.55272	7.712	8.01842	0.00320737
0.55276	-8.213	7.78137	0.00311255
0.5528	-2.751	7.54559	0.00301823
0.55284	-5.843	7.31118	0.00292447
0.55288	12.39	7.07824	0.0028313
0.55292	21.27	6.84686	0.00273874
0.55296	28.12	6.61712	0.00264685
0.553	29.36	6.38912	0.00255565
0.55304	21.58	6.16299	0.0024652
0.55308	13.41	5.93885	0.00237554
0.55312	-10.18	5.71685	0.00228674
0.55316	-22.26	5.49714	0.00219886
0.5532	-37.46	5.27984	0.00211194
0.55324	-34.4	5.06508	0.00202603
0.55328	-35.64	4.85293	0.00194117
0.55332	-16.74	4.64345	0.00185738
0.55336	-14.43	4.43666	0.00177466
0.5534	4.908	4.23255	0.00169302
0.55344	12.86	4.03113	0.00161245
0.55348	9.388	3.83237	0.00153295
0.55352	21.21	3.63626	0.00145451
0.55356	12.65	3.44281	0.00137713
0.5536	-3.704	3.25203	0.00130081
0.55364	-14.92	3.06392	0.00122557
0.55368	-22.35	2.87849	0.0011514
0.55372	-26.1	2.69573	0.00107829
0.55376	-25.52	2.51563	0.00100625
0.5538	-8.473	2.33813	0.000935252
0.55384	21.73	2.16317	0.000865267
0.55388	-6.97	1.99068	0.00079627
0.55392	16.38	1.82058	0.000728233
0.55396	33.87	1.65282	0.000661129
0.554	17.57	1.48734	0.000594938
0.55404	21.99	1.32411	0.000529645
0.55408	31.58	1.16311	0.000465242
0.55412	-13.76	1.00433	0.00040173
0.55416	-4.514	0.847781	0.000339113
0.5542	-20.21	0.693485	0.000277394
0.55424	-28.62	0.541437	0.000216575
0.55428	-23.47	0.391624	0.00015665
0.55432	-23.13	0.244012	9.76049e-05
0.55436	8.925	0.0985497	3.94199e-05
0.5544	-4.803	-0.0448287	-1.79315e-05
0.55444	20.69	-0.186191	-7.44763e-05
0.55448	42.31	-0.325599	-0.000130239
0.55452	-11.51	-0.4631	-0.00018524
0.55456	3.29	-0.598729	-0.000239492
0.5546	-11.83	-0.73251	-0.000293004
0.55464	-14.66	-0.864472	-0.000345789
0.55468	-30.84	-0.99465	-0.00039786
0.55472	-25.09	-1.12309	-0.000449237
0.55476	-41.1	-1.24987	-0.000499949
0.5548	-27.75	-1.37508	-0.000550031
0.55484	5.11	-1.49883	-0.000599532
0.55488	19.27	-1.62126	-0.000648503
0.55492	16.5	-1.74249	-0.000696998
0.55496	22.65	-1.86266	-0.000745065
0.555	15.28	-1.98186	-0.000792745
0.55504	11.47	-2.10019	-0.000840075
0.55508	10.02	-2.21771	-0.000887084
0.55512	-17.95	-2.33449	-0.000933795
0.55516	-33.59	-2.45058	-0.000980234
0.5552	-30.09	-2.56607	-0.00102643
0.55524	-11.05	-2.68103	-0.00107241
0.55528	-34.11	-2.79556	-0.00111823
0.55532	-30.9	-2.90981	-0.00116392
0.55536	8.029	-3.0239	-0.00120956
0.5554	7.827	-3.13799	-0.0012552
0.55544	19.36	-3.25225	-0.0013009
0.55548	28.58	-3.36681	-0.00134672
0.55552	29.53	-3.4818	-0.00139272
0.55556	6.122	-3.59732	-0.00143893
0.5556	12.77	-3.71347	-0.00148539
0.55564	-4.427	-3.8303	-0.00153212
0.55568	-33.1	-3.94789	-0.00157915
0.55572	-31.25	-4.06629	-0.00162651
0.55576	-23.07	-4.18558	-0.00167423
0.5558	-18.85	-4.30587	-0.00172235
0.55584	-8.647	-4.42728	-0.00177091
0.55588	-5.525	-4.54991	-0.00181997
0.55592	-10.58	-4.67392	-0.00186957
0.55596	15.51	-4.79944	-0.00191977
0.556	30.92	-4.92658	-0.00197063
0.55604	-3.589	-5.05548	-0.00202219
0.55608	-10.09	-5.18624	-0.00207449
0.55612	-4.167	-5.31894	-0.00212758
0.55616	-18.94	-5.45369	-0.00218148
0.5562	-27.52	-5.59058	-0.00223623
0.55624	-38.33	-5.72973	-0.00229189
0.55628	-17.29	-5.87126	-0.0023485
0.55632	-12.66	-6.01531	-0.00240612
0.55636	-8.878	-6.16204	-0.00246482
0.5564	7.307	-6.31162	-0.00252465
0.55644	32.74	-6.46421	-0.00258569
0.55648	18.64	-6.61996	-0.00264798
0.55652	35.77	-6.77898	-0.00271159
0.55656	1.7	-6.9414	-0.00277656
0.5566	-17.49	-7.10727	-0.00284291
0.55664	-17.81	-7.27667	-0.00291067
0.55668	-14.92	-7.44968	-0.00297987
0.55672	-32.89	-7.62636	-0.00305055
0.55676	-16.42	-7.80682	-0.00312273
0.5568	-1.421	-7.99114	-0.00319646
0.55684	0.08163	-8.17944	-0.00327178
0.55688	25.51	-8.37183	-0.00334873
0.55692	10.89	-8.56838	-0.00342735
0.55696	20.92	-8.76919	-0.00350767
0.557	15.89	-8.97429	-0.00358972
0.55704	-4.6	-9.18374	-0.0036735
0.55708	-3.647	-9.39754	-0.00375902
0.55712	-11.62	-9.6157	-0.00384628
0.55716	0.862	-9.83823	-0.00393529
0.5572	-19.89	-10.0651	-0.00402605
0.55724	-3.733	-10.2964	-0.00411856
0.55728	5.544	-10.532	-0.00421281
0.55732	16.67	-10.772	-0.00430881
0.55736	9.561	-11.0164	-0.00440654
0.5574	13.67	-11.265	-0.004506
0.55744	15.51	-11.5179	-0.00460716
0.55748	20.37	-11.775	-0.00470999
0.55752	7.105	-12.0361	-0.00481444
0.55756	-5.67	-12.3012	-0.00492048
0.5576	-8.791	-12.5701	-0.00502805
0.55764	-31.85	-12.8427	-0.00513708
0.55768	-31.65	-13.1188	-0.00524753
0.55772	-41.88	-13.3983	-0.00535934
0.55776	-6.97	-13.6811	-0.00547246
0.5578	7.712	-13.9671	-0.00558685
0.55784	-3.358	-14.2562	-0.00570247
0.55788	26.01	-14.5482	-0.00581928
0.55792	8.232	-14.843	-0.00593721
0.55796	8.376	-15.1405	-0.00605621
0.558	9.764	-15.4405	-0.00617621
0.55804	-21.65	-15.7428	-0.00629712
0.55808	-15.9	-16.0471	-0.00641885
0.55812	-18.73	-16.3533	-0.00654134
0.55816	-21.1	-16.6612	-0.00666448
0.5582	-18.76	-16.9705	-0.0067882
0.55824	-14.17	-17.281	-0.00691241
0.55828	9.85	-17.5925	-0.00703702
0.55832	18.38	-17.9049	-0.00716195
0.55836	30.34	-18.2178	-0.0072871
0.5584	-1.248	-18.5309	-0.00741237
0.55844	8.781	-18.8441	-0.00753764
0.55848	16.04	-19.1569	-0.00766277
0.55852	-11.8	-19.4691	-0.00778764
0.55856	-7.635	-19.7803	-0.0079121
0.5586	-26.62	-20.09	-0.008036
0.55864	-20.32	-20.398	-0.00815918
0.55868	-34.22	-20.7038	-0.0082815
0.55872	-2.202	-21.007	-0.0084028
0.55876	-45.5	-21.3073	-0.00852293
0.5588	-61.3	-21.6044	-0.00864175
0.55884	-12.32	-21.8978	-0.0087591
0.55888	-11.77	-22.1871	-0.00887485
0.55892	-59.74	-22.4722	-0.00898887
0.55896	-64.8	-22.7525	-0.00910101
0.559	-58.21	-23.0279	-0.00921116
0.55904	-17.78	-23.298	-0.0093192
0.55908	3.405	-23.5625	-0.00942502
0.55912	-40.03	-23.8213	-0.00952851
0.55916	-28.1	-24.0739	-0.00962957
0.5592	-31.54	-24.3202	-0.00972809
0.55924	-69.57	-24.5599	-0.00982397
0.55928	-67.95	-24.7928	-0.00991711
0.55932	-21.1	-25.0185	-0.0100074
0.55936	-11.39	-25.237	-0.0100948
0.5594	-30.35	-25.448	-0.0101792
0.55944	-51.65	-25.6513	-0.0102605
0.55948	-47.89	-25.8468	-0.0103387
0.55952	-6.045	-26.0342	-0.0104137
0.55956	-25.44	-26.2135	-0.0104854
0.5596	-37.52	-26.3844	-0.0105537
0.55964	-23.47	-26.5467	-0.0106187
0.55968	-49.66	-26.7003	-0.0106801
0.55972	-31.16	-26.8451	-0.010738
0.55976	-40.96	-26.9808	-0.0107923
0.5598	-87.06	-27.1074	-0.010843
0.55984	-86.97	-27.2247	-0.0108899
0.55988	-60.38	-27.3327	-0.0109331
0.55992	-21.57	-27.4312	-0.0109725
0.55996	-23.96	-27.5204	-0.0110081
0.56	-17.23	-27.6	-0.01104
0.56004	-59.11	-27.6703	-0.0110681
0.56008	-19.37	-27.7311	-0.0110924
0.56012	-24.28	-27.7824	-0.011113
0.56016	-42.11	-27.8243	-0.0111297
0.5602	-37.17	-27.8567	-0.0111427
0.56024	-28.56	-27.8796	-0.0111518
0.56028	-37.03	-27.893	-0.0111572
0.56032	-56.88	-27.8971	-0.0111588
0.56036	-77.26	-27.8917	-0.0111567
0.5604	-71.3	-27.8769	-0.0111508
0.56044	-22.06	-27.8529	-0.0111412
0.56048	-24.89	-27.8198	-0.0111279
0.56052	-19.69	-27.7775	-0.011111
0.56056	-32.58	-27.7264	-0.0110905
0.5606	-17.92	-27.6664	-0.0110665
0.56064	-24.17	-27.5976	-0.0110391
0.56068	-22.17	-27.5203	-0.0110081
0.56072	4.532	-27.4345	-0.0109738
0.56076	-47.52	-27.3402	-0.0109361
0.5608	-33.15	-27.2376	-0.0108951
0.56084	-106	-27.1268	-0.0108507
0.56088	-73.56	-27.0078	-0.0108031
0.56092	-41.45	-26.8808	-0.0107523
0.56096	0.9198	-26.7461	-0.0106984
0.561	13.43	-26.6037	-0.0106415
0.56104	19.36	-26.4539	-0.0105816
0.56108	-40.29	-26.2968	-0.0105187
0.56112	-23.82	-26.1325	-0.010453
0.56116	-19.95	-25.9613	-0.0103845
0.5612	-17.23	-25.7831	-0.0103132
0.56124	-52.35	-25.5981	-0.0102393
0.56128	-46.3	-25.4065	-0.0101626
0.56132	-51.59	-25.2084	-0.0100833
0.56136	-31.22	-25.0038	-0.0100015
0.5614	-35.52	-24.7931	-0.00991724
0.56144	-24.17	-24.5763	-0.00983053
0.56148	-30.58	-24.3537	-0.00974149
0.56152	-37.55	-24.1254	-0.00965017
0.56156	31.06	-23.8917	-0.00955667
0.5616	-81.22	-23.6527	-0.00946106
0.56164	-10.96	-23.4085	-0.00936341
0.56168	-7.895	-23.1595	-0.0092638
0.56172	-1.71	-22.9057	-0.00916229
0.56176	-39.69	-22.6474	-0.00905898
0.5618	-27.37	-22.3848	-0.00895392
0.56184	-36.13	-22.118	-0.00884718
0.56188	-72	-21.8471	-0.00873885
0.56192	-7.057	-21.5725	-0.008629
0.56196	-21.57	-21.2943	-0.00851772
0.562	-23.01	-21.0128	-0.0084051
0.56204	4.706	-20.7281	-0.00829123
0.56208	-11.94	-20.4405	-0.0081762
0.56212	-11.68	-20.1502	-0.00806008
0.56216	-11.33	-19.8574	-0.00794297
0.5622	-25.76	-19.5623	-0.00782493
0.56224	-12.52	-19.2651	-0.00770604
0.56228	-24.28	-18.9659	-0.00758638
0.56232	-25.78	-18.665	-0.00746602
0.56236	-35.5	-18.3626	-0.00734503
0.5624	-20.12	-18.0587	-0.0072235
0.56244	5.746	-17.7537	-0.0071015
0.56248	-22.92	-17.4478	-0.00697911
0.56252	0.1683	-17.1411	-0.00685642
0.56256	5.428	-16.8338	-0.0067335
0.5626	1.613	-16.5261	-0.00661043
0.56264	28.52	-16.2181	-0.00648725
0.56268	12.28	-15.9101	-0.00636404
0.56272	12.34	-15.6021	-0.00624083
0.56276	-34.51	-15.2942	-0.00611766
0.5628	-7.057	-14.9864	-0.00599457
0.56284	-64.37	-14.6789	-0.00587158
0.56288	-59.89	-14.3718	-0.00574872
0.56292	-57.69	-14.0651	-0.00562606
0.56296	-12.03	-13.7591	-0.00550363
0.563	13.14	-13.4538	-0.00538152
0.56304	22.94	-13.1495	-0.00525979
0.56308	50.98	-12.8463	-0.0051385
0.56312	15.57	-12.5443	-0.00501771
0.56316	22.88	-12.2436	-0.00489746
0.5632	27.71	-11.9444	-0.00477776
0.56324	8.001	-11.6466	-0.00465863
0.56328	-29.69	-11.3502	-0.00454006
0.56332	-31.74	-11.0552	-0.00442206
0.56336	-19.74	-10.7616	-0.00430463
0.5634	-28.47	-10.4694	-0.00418776
0.56344	-40.93	-10.1787	-0.00407147
0.56348	-34.83	-9.88944	-0.00395578
0.56352	-32	-9.60174	-0.0038407
0.56356	-9.398	-9.31566	-0.00372626
0.5636	22.6	-9.03128	-0.00361251
0.56364	5.544	-8.7487	-0.00349948
0.56368	10.98	-8.468	-0.0033872
0.56372	16.38	-8.18923	-0.00327569
0.56376	9.128	-7.91243	-0.00316497
0.5638	-6.797	-7.63765	-0.00305506
0.56384	-2.693	-7.36488	-0.00294595
0.56388	-0.3808	-7.09414	-0.00283766
0.56392	-3.271	-6.82544	-0.00273018
0.56396	5.371	-6.55878	-0.00262351
0.564	-37.4	-6.29415	-0.00251766
0.56404	-10.84	-6.03156	-0.00241262
0.56408	-33.88	-5.771	-0.0023084
0.56412	-11.71	-5.51251	-0.002205
0.56416	-16.31	-5.25612	-0.00210245
0.5642	13.26	-5.00188	-0.00200075
0.56424	14.65	-4.74982	-0.00189993
0.56428	20.69	-4.49999	-0.0018
0.56432	15.02	-4.25242	-0.00170097
0.56436	22.08	-4.00709	-0.00160284
0.5644	-0.6987	-3.76401	-0.0015056
0.56444	-4.6	-3.52314	-0.00140926
0.56448	-3.849	-3.28445	-0.00131378
0.56452	-10.29	-3.0479	-0.00121916
0.56456	-22.17	-2.81346	-0.00112538
0.5646	-23.42	-2.5811	-0.00103244
0.56464	-10.81	-2.35082	-0.000940327
0.56468	-3.271	-2.1226	-0.000849041
0.56472	-16.83	-1.89646	-0.000758586
0.56476	-12.4	-1.67242	-0.000668968
0.5648	31.99	-1.45049	-0.000580195
0.56484	33.64	-1.23069	-0.000492276
0.56488	29.5	-1.01303	-0.000405211
0.56492	16.5	-0.797477	-0.000318991
0.56496	2.683	-0.583996	-0.000233598
0.565	-4.369	-0.372526	-0.00014901
0.56504	-26.94	-0.163005	-6.5202e-05
0.56508	-27.58	0.0446219	1.78488e-05
0.56512	-30.32	0.250394	0.000100158
0.56516	-22.03	0.454329	0.000181732
0.5652	-4.832	0.656422	0.000262569
0.56524	-0.3808	0.856654	0.000342661
0.56528	-3.936	1.05499	0.000421998
0.56532	11.18	1.25141	0.000500565
0.56536	-0.901	1.44588	0.000578351
0.5654	5.082	1.63836	0.000655343
0.56544	-0.03397	1.82882	0.000731529
0.56548	14.5	2.01725	0.0008069
0.56552	9.764	2.20361	0.000881444
0.56556	8.463	2.38789	0.000955155
0.5656	-6.71	2.57007	0.00102803
0.56564	8.087	2.75014	0.00110006
0.56568	22.86	2.9281	0.00117124
0.56572	9.85	3.10393	0.00124157
0.56576	19.73	3.27765	0.00131106
0.5658	12.19	3.44926	0.0013797
0.56584	28.69	3.61879	0.00144752
0.56588	35.89	3.78628	0.00151451
0.56592	13.55	3.95179	0.00158071
0.56596	4.214	4.11538	0.00164615
0.566	-6.306	4.27714	0.00171086
0.56604	1.556	4.43716	0.00177486
0.56608	-1.97	4.59551	0.00183821
0.56612	2.22	4.75229	0.00190091
0.56616	-5.843	4.90754	0.00196302
0.5662	3.058	5.06135	0.00202454
0.56624	12.65	5.21378	0.00208551
0.56628	-0.06288	5.36489	0.00214596
0.56632	21.9	5.51475	0.0022059
0.56636	-0.7565	5.66341	0.00226536
0.5664	6.122	5.81095	0.00232438
0.56644	34.13	5.95743	0.00238297
0.56648	14.88	6.10295	0.00244118
0.56652	-2.115	6.24758	0.00249903
0.56656	3.579	6.39141	0.00255656
0.5666	-11.77	6.53455	0.00261382
0.56664	-9.774	6.67707	0.00267083
0.56668	-19.17	6.81905	0.00272762
0.56672	10.66	6.96056	0.00278422
0.56676	-6.479	7.10164	0.00284065
0.5668	19.88	7.24233	0.00289693
0.56684	8.579	7.38266	0.00295307
0.56688	20.2	7.52269	0.00300908
0.56692	8.983	7.66246	0.00306498
0.56696	-0.3808	7.80202	0.00312081
0.567	7.625	7.94141	0.00317657
0.56704	-13.36	8.0807	0.00323228
0.56708	-11.65	8.21992	0.00328797
0.56712	11.15	8.3591	0.00334364
0.56716	5.631	8.49827	0.00339931
0.5672	18.12	8.63743	0.00345497
0.56724	3.839	8.77661	0.00351065
0.56728	13.55	8.91583	0.00356633
0.56732	16.87	9.05511	0.00362204
0.56736	13.41	9.19446	0.00367778
0.5674	-7.895	9.33391	0.00373357
0.56744	3.347	9.4735	0.0037894
0.56748	9.85	9.61324	0.0038453
0.56752	15.63	9.75314	0.00390126
0.56756	13.52	9.89322	0.00395729
0.5676	8.001	10.0335	0.0040134
0.56764	0.5729	10.174	0.0040696
0.56768	-10.12	10.3147	0.00412588
0.56772	9.821	10.4557	0.00418227
0.56776	12.28	10.5969	0.00423875
0.5678	3.925	10.7383	0.00429532
0.56784	-20.61	10.8799	0.00435198
0.56788	4.706	11.0218	0.00440872
0.56792	-1.248	11.1638	0.00446553
0.56796	-12.98	11.306	0.00452239
0.568	-7.115	11.4482	0.00457928
0.56804	-9.976	11.5904	0.00463617
0.56808	4.359	11.7326	0.00469303
0.56812	20.54	11.8745	0.00474981
0.56816	8.058	12.0162	0.00480648
0.5682	17.39	12.1575	0.00486298
0.56824	-27.78	12.2982	0.00491929
0.56828	-18.1	12.4383	0.00497534
0.56832	-8.82	12.5777	0.00503108
0.56836	-14.48	12.7162	0.00508646
0.5684	-2.173	12.8535	0.0051414
0.56844	14.3	12.9895	0.00519581
0.56848	10.37	13.1241	0.00524963
0.56852	14.04	13.2569	0.00530275
0.56856	8.405	13.3877	0.0053551
0.5686	-9.889	13.5165	0.00540658
0.56864	-10.12	13.6428	0.00545712
0.56868	-2.982	13.7665	0.0055066
0.56872	34.73	13.8873	0.00555493
0.56876	15.72	14.005	0.00560201
0.5688	40.37	14.1193	0.00564773
0.56884	39.1	14.23	0.005692
0.56888	33.43	14.3368	0.00573471
0.56892	12.19	14.4395	0.00577579
0.56896	29.97	14.5379	0.00581515
0.569	63.78	14.6318	0.00585272
0.56904	-0.901	14.7211	0.00588842
0.56908	28.69	14.8055	0.0059222
0.56912	53.17	14.885	0.00595399
0.56916	-3.358	14.9593	0.00598374
0.5692	31.32	15.0285	0.00601139
0.56924	26.87	15.0922	0.0060369
0.56928	37.68	15.1505	0.00606022
0.56932	-22.84	15.2033	0.00608131
0.56936	28.78	15.2503	0.00610012
0.5694	83.32	15.2916	0.00611662
0.56944	48.61	15.3269	0.00613078
0.56948	61.12	15.3564	0.00614256
0.56952	4.272	15.3799	0.00615195
0.56956	26.44	15.3974	0.00615897
0.5696	46.7	15.409	0.0061636
0.56964	53.23	15.4147	0.00616587
0.56968	8.203	15.4144	0.00616578
0.56972	35.92	15.4084	0.00616336
0.56976	57.88	15.3966	0.00615864
0.5698	61.41	15.3791	0.00615166
0.56984	46.06	15.3561	0.00614245
0.56988	17.48	15.3277	0.00613109
0.56992	-16.33	15.2941	0.00611765
0.56996	25.25	15.2554	0.00610218
0.57	41.93	15.2119	0.00608476
0.57004	18.03	15.1636	0.00606545
0.57008	-6.248	15.1108	0.00604434
0.57012	18.67	15.0537	0.00602148
0.57016	23.4	14.9924	0.00599696
0.5702	18.95	14.9271	0.00597084
0.57024	23.64	14.858	0.00594319
0.57028	14.82	14.7852	0.0059141
0.57032	24.5	14.7091	0.00588363
0.57036	2.076	14.6296	0.00585186
0.5704	32.39	14.5472	0.00581888
0.57044	-6.826	14.4619	0.00578475
0.57048	-11.13	14.3739	0.00574957
0.57052	9.879	14.2835	0.00571339
0.57056	-13.44	14.1907	0.0056763
0.5706	1.642	14.0959	0.00563835
0.57064	0.08163	13.999	0.0055996
0.57068	-3.3	13.9003	0.0055601
0.57072	1.498	13.7998	0.0055199
0.57076	-2.057	13.6976	0.00547905
0.5708	-24.48	13.5939	0.00543757
0.57084	-3.647	13.4887	0.0053955
0.57088	-18.15	13.3821	0.00535285
0.57092	-13.1	13.2741	0.00530965
0.57096	5.371	13.1647	0.0052659
0.571	30.05	13.054	0.00522159
0.57104	26.96	12.9418	0.00517672
0.57108	-8.329	12.8282	0.00513128
0.57112	20.31	12.7132	0.00508528
0.57116	16.93	12.5968	0.00503871
0.5712	37.28	12.4789	0.00499157
0.57124	26.87	12.3597	0.00494387
0.57128	5.746	12.239	0.0048956
0.57132	-6.71	12.117	0.00484679
0.57136	-19.69	11.9936	0.00479743
0.5714	4.879	11.8688	0.00474753
0.57144	3.29	11.7427	0.00469708
0.57148	13.09	11.6152	0.00464608
0.57152	21.3	11.4863	0.00459452
0.57156	30.6	11.356	0.00454239
0.5716	34.97	11.2242	0.00448968
0.57164	26.27	11.091	0.00443638
0.57168	28.46	10.9563	0.00438252
0.57172	24.97	10.8202	0.00432809
0.57176	20.89	10.6828	0.00427311
0.5718	17.34	10.544	0.00421761
0.57184	-8.271	10.404	0.0041616
0.57188	-3.011	10.2628	0.00410512
0.57192	-1.479	10.1205	0.00404819
0.57196	7.538	9.97704	0.00399082
0.572	53.75	9.83255	0.00393302
0.57204	29.27	9.68705	0.00387482
0.57208	24.16	9.5406	0.00381624
0.57212	19.5	9.39328	0.00375731
0.57216	19.21	9.24518	0.00369807
0.5722	-4.282	9.09641	0.00363856
0.57224	-23.18	8.94706	0.00357882
0.57228	-5.121	8.79724	0.0035189
0.57232	-1.335	8.64702	0.00345881
0.57236	12.57	8.49648	0.00339859
0.5724	11.38	8.34565	0.00333826
0.57244	19.71	8.19462	0.00327785
0.57248	28.61	8.04344	0.00321737
0.57252	4.648	7.89217	0.00315687
0.57256	16.93	7.74091	0.00309637
0.5726	-1.074	7.58974	0.0030359
0.57264	15.4	7.43875	0.0029755
0.57268	16.01	7.28802	0.00291521
0.57272	6.902	7.13764	0.00285506
0.57276	2.336	6.98772	0.00279509
0.5728	-4.282	6.83835	0.00273534
0.57284	-28.62	6.68962	0.00267585
0.57288	-12.4	6.5416	0.00261664
0.57292	5.371	6.39437	0.00255775
0.57296	-3.271	6.24796	0.00249918
0.573	6.469	6.10241	0.00244096
0.57304	12.91	5.95776	0.0023831
0.57308	0.6886	5.81404	0.00232562
0.57312	5.371	5.67129	0.00226852
0.57316	-13.3	5.52954	0.00221181
0.5732	-10.03	5.38881	0.00215552
0.57324	-27.23	5.24913	0.00209965
0.57328	24.04	5.1105	0.0020442
0.57332	15.57	4.9729	0.00198916
0.57336	-18.01	4.83634	0.00193454
0.5734	-5.699	4.7008	0.00188032
0.57344	8.636	4.56627	0.00182651
0.57348	30.17	4.43273	0.00177309
0.57352	20.02	4.30016	0.00172007
0.57356	1.584	4.16857	0.00166743
0.5736	9.012	4.03796	0.00161519
0.57364	2.798	3.90834	0.00156334
0.57368	-13.73	3.77973	0.00151189
0.57372	-5.814	3.65212	0.00146085
0.57376	-23.18	3.52553	0.00141021
0.5738	-21.74	3.39994	0.00135997
0.57384	-10.03	3.27531	0.00131012
0.57388	17.16	3.1516	0.00126064
[truncated: 23,003 more rows]

## Sheet: Sheet2
0.5904	24.13	1.9138	0.000765519
0.59044	28.52	5.12574	0.0020503
0.59048	18.17	8.49079	0.00339632
0.59052	33.61	12.0128	0.0048051
0.59056	4.59	15.6955	0.0062782
0.5906	1.353	19.5428	0.00781713
0.59064	19.65	23.5586	0.00942345
0.59068	12.71	27.7467	0.0110987
0.59072	49.27	32.1109	0.0128444
0.59076	38.66	36.655	0.014662
0.5908	20.08	41.3829	0.0165532
0.59084	25.14	46.2983	0.0185193
0.59088	23.87	51.4052	0.0205621
0.59092	13	56.7072	0.0226829
0.59096	6.931	62.2082	0.0248833
0.591	3.492	67.9119	0.0271648
0.59104	10.51	73.822	0.0295288
0.59108	-17.06	79.9421	0.0319768
0.59112	5.746	86.2757	0.0345103
0.59116	26.61	92.8265	0.0371306
0.5912	24.13	99.5978	0.0398391
0.59124	21.3	106.593	0.0426372
0.59128	-15.96	113.815	0.0455262
0.59132	-8.242	121.268	0.0485074
0.59136	9.041	128.955	0.051582
0.5914	9.995	136.878	0.0547513
0.59144	38.95	145.041	0.0580164
0.59148	31.73	153.446	0.0613785
0.59152	17.94	162.097	0.0648386
0.59156	5.168	170.995	0.0683979
0.5916	13.49	180.143	0.0720573
0.59164	32.88	189.544	0.0758178
0.59168	22.13	199.201	0.0796803
0.59172	77.02	209.114	0.0836456
0.59176	78.52	219.286	0.0877145
0.5918	112	229.719	0.0918878
0.59184	111.2	240.415	0.0961661
0.59188	92.36	251.376	0.10055
0.59192	102.9	262.602	0.105041
0.59196	140.5	274.095	0.109638
0.592	109.1	285.857	0.114343
0.59204	91.21	297.889	0.119155
0.59208	108.4	310.191	0.124076
0.59212	102.7	322.765	0.129106
0.59216	104.8	335.611	0.134244
0.5922	135	348.73	0.139492
0.59224	185.8	362.122	0.144849
0.59228	199.2	375.787	0.150315
0.59232	246.2	389.725	0.15589
0.59236	276.3	403.937	0.161575
0.5924	292.7	418.421	0.167368
0.59244	318.1	433.178	0.173271
0.59248	302.4	448.206	0.179283
0.59252	282.9	463.506	0.185403
0.59256	256.1	479.077	0.191631
0.5926	225.7	494.917	0.197967
0.59264	188.4	511.026	0.20441
0.59268	219.1	527.403	0.210961
0.59272	198.6	544.045	0.217618
0.59276	237.9	560.951	0.224381
0.5928	229.7	578.12	0.231248
0.59284	283.1	595.548	0.238219
0.59288	291.5	613.233	0.245293
0.59292	298.5	631.173	0.252469
0.59296	308.9	649.363	0.259745
0.593	259.7	667.802	0.267121
0.59304	268.8	686.484	0.274593
0.59308	241.5	705.406	0.282162
0.59312	239.5	724.563	0.289825
0.59316	224.8	743.951	0.29758
0.5932	234.7	763.565	0.305426
0.59324	221.6	783.398	0.313359
0.59328	227.7	803.446	0.321378
0.59332	256	823.7	0.32948
0.59336	479.1	844.155	0.337662
0.5934	718.6	864.803	0.345921
0.59344	542.8	885.636	0.354255
0.59348	549.3	906.647	0.362659
0.59352	507.6	927.827	0.371131
0.59356	419	949.168	0.379667
0.5936	400.1	970.66	0.388264
0.59364	94.62	992.295	0.396918
0.59368	179	1014.06	0.405625
0.59372	241.1	1035.95	0.414381
0.59376	-57.95	1057.95	0.423182
0.5938	54.3	1080.06	0.432022
0.59384	277.4	1102.24	0.440897
0.59388	440.4	1124.5	0.449801
0.59392	668	1146.82	0.458729
0.59396	845.7	1169.19	0.467674
0.594	820.7	1191.58	0.476631
0.59404	758.4	1213.98	0.485594
0.59408	561.1	1236.39	0.494555
0.59412	545.6	1258.77	0.503509
0.59416	372	1281.12	0.512449
0.5942	152.9	1303.42	0.521368
0.59424	249.7	1325.65	0.530259
0.59428	193.1	1347.78	0.539113
0.59432	70.31	1369.81	0.547924
0.59436	127	1391.7	0.556682
0.5944	263.2	1413.45	0.565379
0.59444	410.3	1435.02	0.574006
0.59448	608.5	1456.38	0.582553
0.59452	687.5	1477.53	0.591011
0.59456	700.4	1498.42	0.599368
0.5946	732.8	1519.04	0.607615
0.59464	608.3	1539.35	0.615741
0.59468	412.6	1559.34	0.623735
0.59472	703.2	1578.96	0.631586
0.59476	2849	1598.2	0.639282
0.5948	4546	1617.03	0.64681
0.59484	6269	1635.4	0.654162
0.59488	8240	1653.31	0.661324
0.59492	9195	1670.73	0.66829
0.59496	10620	1687.63	0.675053
0.595	9943	1704.02	0.681607
0.59504	8782	1719.88	0.687952
0.59508	8803	1735.22	0.694089
0.59512	6816	1750.05	0.700021
0.59516	5677	1764.39	0.705755
0.5952	5379	1778.24	0.711297
0.59524	3624	1791.64	0.716657
0.59528	2872	1804.61	0.721844
0.59532	1482	1817.17	0.726869
0.59536	564.2	1829.36	0.731743
0.5954	813.1	1841.19	0.736476
0.59544	589.2	1852.7	0.74108
0.59548	737.6	1863.91	0.745565
0.59552	1282	1874.85	0.74994
0.59556	922.1	1885.54	0.754215
0.5956	737	1896	0.758399
0.59564	888.5	1906.25	0.762501
0.59568	661.5	1916.33	0.76653
0.59572	559.1	1926.23	0.770494
0.59576	581.8	1936	0.7744
0.5958	1015	1945.64	0.778256
0.59584	1150	1955.17	0.782069
0.59588	571.9	1964.61	0.785846
0.59592	300	1973.98	0.789592
0.59596	167	1983.28	0.793314
0.596	-730.8	1992.54	0.797017
0.59604	-815.2	2001.76	0.800705
0.59608	-485.9	2010.96	0.804383
0.59612	-602.2	2020.13	0.808052
0.59616	-45.35	2029.29	0.811716
0.5962	257.2	2038.44	0.815375
0.59624	259.6	2047.58	0.819031
0.59628	693	2056.7	0.822682
0.59632	908.7	2065.82	0.826328
0.59636	1091	2074.92	0.829969
0.5964	1360	2084.01	0.833602
0.59644	1328	2093.07	0.837226
0.59648	1135	2102.1	0.840839
0.59652	1174	2111.1	0.844439
0.59656	650.9	2120.06	0.848022
0.5966	1836	2128.97	0.851586
0.59664	3141	2137.82	0.855127
0.59668	3317	2146.61	0.858643
0.59672	4488	2155.32	0.862129
0.59676	5440	2163.96	0.865584
0.5968	5845	2172.51	0.869005
0.59684	5082	2180.98	0.872392
0.59688	5232	2189.36	0.875744
0.59692	5373	2197.66	0.879063
0.59696	3925	2205.88	0.882351
0.597	3184	2214.03	0.885611
0.59704	2835	2222.12	0.888846
0.59708	2255	2230.16	0.892062
0.59712	1158	2238.15	0.895262
0.59716	326.8	2246.12	0.89845
0.5972	91.61	2254.07	0.90163
0.59724	-1.652	2262.01	0.904805
0.59728	466.9	2269.95	0.907979
0.59732	895	2277.88	0.911153
0.59736	1692	2285.82	0.914328
0.5974	1505	2293.76	0.917506
0.59744	1677	2301.72	0.920686
0.59748	2793	2309.68	0.92387
0.59752	3017	2317.65	0.927058
0.59756	3568	2325.63	0.930251
0.5976	4611	2333.62	0.933448
0.59764	4950	2341.63	0.936651
0.59768	5070	2349.65	0.939862
0.59772	4782	2357.71	0.943083
0.59776	4425	2365.8	0.946318
0.5978	3856	2373.93	0.949572
0.59784	2994	2382.12	0.952848
0.59788	2399	2390.38	0.956153
0.59792	1928	2398.73	0.959492
0.59796	1279	2407.18	0.96287
0.598	677.8	2415.73	0.966294
0.59804	324.1	2424.42	0.969767
0.59808	118.6	2433.24	0.973295
0.59812	23.12	2442.2	0.976881
0.59816	56.55	2451.32	0.980529
0.5982	232.5	2460.6	0.984241
0.59824	409.7	2470.05	0.988018
0.59828	598.5	2479.65	0.991861
0.59832	880.1	2489.43	0.995771
0.59836	1245	2499.37	0.999747
0.5984	1681	2509.47	1.00379
0.59844	2071	2519.73	1.00789
0.59848	2638	2530.14	1.01206
0.59852	3303	2540.71	1.01628
0.59856	3876	2551.42	1.02057
0.5986	4188	2562.27	1.02491
0.59864	4553	2573.26	1.0293
0.59868	4580	2584.39	1.03376
0.59872	4145	2595.65	1.03826
0.59876	3861	2607.06	1.04282
0.5988	3481	2618.61	1.04744
0.59884	3039	2630.3	1.05212
0.59888	2670	2642.15	1.05686
0.59892	2421	2654.15	1.06166
0.59896	2348	2666.31	1.06652
0.599	2216	2678.64	1.07146
0.59904	2026	2691.14	1.07645
0.59908	1866	2703.81	1.08152
0.59912	1791	2716.66	1.08666
0.59916	1730	2729.69	1.09188
0.5992	1747	2742.9	1.09716
0.59924	1916	2756.3	1.10252
0.59928	2139	2769.89	1.10795
0.59932	2429	2783.66	1.11346
0.59936	2778	2797.61	1.11904
0.5994	2997	2811.75	1.1247
0.59944	3234	2826.07	1.13043
0.59948	3420	2840.58	1.13623
0.59952	3520	2855.27	1.14211
0.59956	3599	2870.14	1.14806
0.5996	3573	2885.2	1.15408
0.59964	3471	2900.43	1.16017
0.59968	3227	2915.86	1.16634
0.59972	2945	2931.47	1.17259
0.59976	2579	2947.28	1.17891
0.5998	2252	2963.28	1.18531
0.59984	2053	2979.47	1.19179
0.59988	2009	2995.86	1.19834
0.59992	2029	3012.45	1.20498
0.59996	2003	3029.23	1.21169
0.6	1944	3046.21	1.21849
0.60004	1969	3063.39	1.22536
0.60008	2042	3080.76	1.23231
0.60012	2159	3098.32	1.23933
0.60016	2402	3116.07	1.24643
0.6002	2715	3133.99	1.2536
0.60024	3093	3152.1	1.26084
0.60028	3396	3170.36	1.26815
0.60032	3654	3188.8	1.27552
0.60036	3917	3207.39	1.28295
0.6004	4152	3226.13	1.29045
0.60044	4359	3245.02	1.29801
0.60048	4567	3264.05	1.30562
0.60052	4709	3283.22	1.31329
0.60056	4656	3302.53	1.32101
0.6006	4429	3321.98	1.32879
0.60064	4104	3341.56	1.33662
0.60068	3732	3361.28	1.34451
0.60072	3371	3381.14	1.35246
0.60076	3157	3401.15	1.36046
0.6008	2993	3421.29	1.36852
0.60084	2902	3441.58	1.37663
0.60088	2812	3462.02	1.38481
0.60092	2655	3482.61	1.39304
0.60096	2557	3503.34	1.40134
0.601	2587	3524.22	1.40969
0.60104	2651	3545.25	1.4181
0.60108	2810	3566.42	1.42657
0.60112	2978	3587.74	1.43509
0.60116	3150	3609.19	1.44368
0.6012	3326	3630.78	1.45231
0.60124	3542	3652.51	1.461
0.60128	3805	3674.36	1.46974
0.60132	4033	3696.33	1.47853
0.60136	4218	3718.42	1.48737
0.6014	4481	3740.63	1.49625
0.60144	4570	3762.96	1.50518
0.60148	4495	3785.39	1.51415
0.60152	4474	3807.93	1.52317
0.60156	4249	3830.57	1.53223
0.6016	4006	3853.32	1.54133
0.60164	3805	3876.17	1.55047
0.60168	3631	3899.12	1.55965
0.60172	3361	3922.17	1.56887
0.60176	3173	3945.33	1.57813
0.6018	3057	3968.58	1.58743
0.60184	2960	3991.93	1.59677
0.60188	2951	4015.38	1.60615
0.60192	3109	4038.92	1.61557
0.60196	3298	4062.54	1.62502
0.602	3438	4086.24	1.6345
0.60204	3639	4110.02	1.64401
0.60208	3846	4133.87	1.65355
0.60212	3982	4157.77	1.66311
0.60216	4098	4181.74	1.6727
0.6022	4311	4205.75	1.6823
0.60224	4590	4229.8	1.69192
0.60228	4878	4253.88	1.70155
0.60232	5128	4278	1.7112
0.60236	5190	4302.13	1.72085
0.6024	5245	4326.27	1.73051
0.60244	5349	4350.43	1.74017
0.60248	5278	4374.59	1.74983
0.60252	5151	4398.75	1.7595
0.60256	4960	4422.91	1.76916
0.6026	4711	4447.07	1.77883
0.60264	4493	4471.22	1.78849
0.60268	4342	4495.37	1.79815
0.60272	4221	4519.51	1.80781
0.60276	4115	4543.65	1.81746
0.6028	4159	4567.77	1.82711
0.60284	4231	4591.88	1.83675
0.60288	4265	4615.97	1.84639
0.60292	4401	4640.05	1.85602
0.60296	4571	4664.1	1.86564
0.603	4699	4688.14	1.87525
0.60304	4874	4712.14	1.88486
0.60308	4950	4736.12	1.89445
0.60312	4881	4760.06	1.90402
0.60316	4801	4783.97	1.91359
0.6032	4640	4807.83	1.92313
0.60324	4402	4831.66	1.93266
0.60328	4169	4855.44	1.94218
0.60332	4002	4879.17	1.95167
0.60336	3863	4902.85	1.96114
0.6034	3815	4926.47	1.97059
0.60344	3841	4950.04	1.98001
0.60348	3833	4973.53	1.98941
0.60352	3825	4996.94	1.99878
0.60356	3840	5020.27	2.00811
0.6036	3905	5043.51	2.0174
0.60364	4098	5066.64	2.02666
0.60368	4355	5089.66	2.03587
0.60372	4653	5112.56	2.04502
0.60376	4999	5135.31	2.05412
0.6038	5337	5157.91	2.06316
0.60384	5657	5180.35	2.07214
0.60388	5956	5202.61	2.08104
0.60392	6287	5224.68	2.08987
0.60396	6457	5246.54	2.09862
0.604	6629	5268.2	2.10728
0.60404	6784	5289.63	2.11585
0.60408	6806	5310.83	2.12433
0.60412	6815	5331.79	2.13272
0.60416	6712	5352.51	2.141
0.6042	6495	5372.98	2.14919
0.60424	6181	5393.19	2.15728
0.60428	5904	5413.14	2.16526
0.60432	5738	5432.84	2.17314
0.60436	5540	5452.27	2.18091
0.6044	5417	5471.44	2.18857
0.60444	5386	5490.34	2.19613
0.60448	5312	5508.97	2.20359
0.60452	5255	5527.33	2.21093
0.60456	5165	5545.42	2.21817
0.6046	5057	5563.24	2.2253
0.60464	4955	5580.78	2.23231
0.60468	4904	5598.04	2.23922
0.60472	4816	5615.02	2.24601
0.60476	4779	5631.71	2.25268
0.6048	4779	5648.11	2.25924
0.60484	4740	5664.21	2.26568
0.60488	4761	5680	2.272
0.60492	4772	5695.49	2.2782
0.60496	4812	5710.66	2.28426
0.605	4934	5725.5	2.2902
0.60504	5123	5740	2.296
0.60508	5233	5754.16	2.30167
0.60512	5351	5767.97	2.30719
0.60516	5495	5781.4	2.31256
0.6052	5683	5794.46	2.31779
0.60524	5888	5807.13	2.32285
0.60528	6122	5819.4	2.32776
0.60532	6337	5831.26	2.33251
0.60536	6498	5842.7	2.33708
0.6054	6633	5853.7	2.34148
0.60544	6722	5864.26	2.3457
0.60548	6777	5874.37	2.34975
0.60552	6836	5884.01	2.35361
0.60556	6820	5893.19	2.35728
0.6056	6740	5901.89	2.36075
0.60564	6704	5910.1	2.36404
0.60568	6534	5917.83	2.36713
0.60572	6368	5925.06	2.37002
0.60576	6211	5931.79	2.37272
0.6058	6062	5938.02	2.37521
