# Supplementary material for: Shear Thickening Fluids in Cork Agglomerates: An Exploration of Advantages and Drawbacks
Source: Preprints.org preprint supplement (doi:10.20944/preprints202304.0004.v1), 2023-04-03
Supplement: Supplementary file 1 [file Ficha Dados Segurança Flexpur 280A.pdf › Supplementary Material/Binder Information/Ficha Dados Segurança Flexpur 280A.pdf]

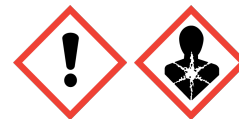

## SECÇÃO 1: IDENTIFICAÇÃO DA SUBSTÂNCIA/MISTURA E DA SOCIEDADE/EMPRESA

- 1.1 Identificador do produto:** Flexpur 280A
- Outros meios de identificação:**
- UFI:** T410-WORX-300J-E5PN
- 1.2 Utilizações identificadas relevantes da substância ou mistura e utilizações desaconselhadas:**
- Usos pertinentes: Cola para cortiça. Para uso utilizador industrial.
- Aglutinante para produção de aglomerados.
- Usos desaconselhados: Todos aqueles usos não especificados nesta epígrafe ou na subsecção 7.3
- 1.3 Identificação do fornecedor da ficha de dados de segurança:**
- FLEXPUR - POLÍMEROS DE POLIURETANO, SA  
RUA DA ESTRADA NOVA, 785 - APARTADO 15  
3886-909 ESMORIZ - PORTUGAL  
Tel.: +351 256 579 610  
flexpur@mail.telepac.pt  
Tel.: +351 256 579 610 / +351 256 581 945  
Fax: +351 256 581 960  
e-mail: flexpur@mail.telepac.pt
- 1.4 Número de telefone de emergência:** Centro de Informação Anti-Venenos (CIAV) do Instituto Nacional de Emergência Médica (INEM) - Tel. + 351 800 250 250

## SECÇÃO 2: IDENTIFICAÇÃO DOS PERIGOS

- 2.1 Classificação da substância ou mistura:**
- Regulamento nº1272/2008 (CLP):**
- A classificação deste produto foi efectuada em conformidade com o Regulamento nº1272/2008 (CLP).
- Acute Tox. 4: Toxicidade aguda (inalação), Categoria 4, H332
- Eye Irrit. 2: Lesões oculares graves/irritação ocular, categoria 2, H319
- Resp. Sens. 1: Sensibilização respiratória, Categoria 1, H334
- Skin Sens. 1: Sensibilização cutânea, Categoria 1, H317

**2.2 Elementos do rótulo:**

**Regulamento nº1272/2008 (CLP):**

Perigo

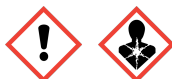

**Advertências de perigo:**

Acute Tox. 4: H332 - Nocivo por inalação.

Eye Irrit. 2: H319 - Provoca irritação ocular grave.

Resp. Sens. 1: H334 - Quando inalado, pode provocar sintomas de alergia ou de asma ou dificuldades respiratorias.

Skin Sens. 1: H317 - Pode provocar uma reacção alérgica cutânea.

**Recomendações de prudência:**

P264: Lavar as mãos cuidadosamente após manuseamento.

P271: Utilizar apenas ao ar livre ou em locais bem ventilados.

P280: Usar luvas de proteção/vestuário de proteção/proteção respiratória/proteção ocular/calçado protetor.

P302+P352: SE ENTRAR EM CONTACTO COM A PELE: lavar abundantemente com água.

P304+P340: EM CASO DE INALAÇÃO: retirar a pessoa para uma zona ao ar livre e mantê-la numa posição que não dificulte a respiração.

P305+P351+P338: SE ENTRAR EM CONTACTO COM OS OLHOS: Enxaguar cuidadosamente com água durante vários minutos. Se usar lentes de contacto, retire-as, se tal lhe for possível. Continue a enxaguar.

P342+P311: Em caso de sintomas respiratorios: contacte um CENTRO DE INFORMAÇÃO ANTI-VENENOS ou um médico.

P501: Eliminar o conteúdo/recipiente de acordo com a norma sobre resíduos perigosos ou embalagens e resíduos de embalagens, respetivamente.

**Informação suplementar:**

EUH204: Contém isocianatos. Pode provocar uma reacção alérgica.

**Substâncias que contribuem para a classificação**

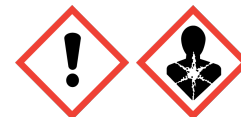**SECÇÃO 2: IDENTIFICAÇÃO DOS PERIGOS (continuação)**

Pré-polímero base TDI; Diisocianato de 2-metil-m-fenileno (CAS: 26471-62-5)

**Informações Adicionais:**

A partir de 24 de agosto de 2023, é necessária formação adequada antes da utilização industrial ou profissional.

UFI: T410-W0RX-300J-E5PN

**2.3 Outros perigos:**

O produto não atende aos critérios PBT/mPmB

O produto não cumpre os critérios devido às suas propriedades de alteração endócrina.

**SECÇÃO 3: COMPOSIÇÃO/INFORMAÇÃO SOBRE OS COMPONENTES****3.1 Substâncias:**

Não aplicável

**3.2 Misturas:**

**Descrição química:** Resina poliuretano

**Componentes:**

De acordo com o Anexo II do Regulamento (EC) nº1907/2006 (ponto 3), o produto contém:

| Identificação                                                                           | Nome químico/classificação                                                                                                                                                                   | Concentração |
|-----------------------------------------------------------------------------------------|----------------------------------------------------------------------------------------------------------------------------------------------------------------------------------------------|--------------|
| CAS: Não aplicável<br>EC: 942-873-9<br>Index: Não aplicável<br>REACH: Não aplicável     | <b>Pré-polímero base TDI<sup>(1)</sup></b> Auto-classificada                                                                                                                                 | 75 - <100 %  |
|                                                                                         | Regulamento 1272/2008 Eye Irrit. 2: H319; Skin Sens. 1: H317 - Atenção                                                                                                                       |              |
| CAS: 26471-62-5<br>EC: 247-722-4<br>Index: 615-006-00-4<br>REACH: 01-2119454791-34-XXXX | <b>Diisocianato de 2-metil-m-fenileno<sup>(1)</sup></b> Auto-classificada                                                                                                                    | 0,5 - <1 %   |
|                                                                                         | Regulamento 1272/2008 Acute Tox. 1: H330; Aquatic Chronic 3: H412; Carc. 2: H351; Eye Irrit. 2: H319; Resp. Sens. 1: H334; Skin Irrit. 2: H315; Skin Sens. 1: H317; STOT SE 3: H335 - Perigo |              |

<sup>(1)</sup> Substância que apresentam um risco para a saúde ou para o meio ambiente e que atendem aos critérios estabelecidos pelo Regulamento (UE) n.º 2020/878

Para mais informações sobre a perigosidade da substâncias, consultar as seções 11, 12 e 16.

**Outras informações:**

| Identificação                                                          | Limite de concentração específico   |
|------------------------------------------------------------------------|-------------------------------------|
| Diisocianato de 2-metil-m-fenileno<br>CAS: 26471-62-5<br>EC: 247-722-4 | % (p/p) >=0,1: Resp. Sens. 1 - H334 |

**SECÇÃO 4: MEDIDAS DE PRIMEIROS SOCORROS****4.1 Descrição das medidas de primeiros socorros:**

Os sintomas como consequência de uma intoxicação podem apresentar-se posteriormente à exposição, pelo que, em caso de dúvida, exposição directa ao produto químico ou persistência do sintoma, solicitar cuidados médicos, mostrando a FDS deste produto.

**Por inalação:**

Retirar o afectado do local de exposição, administrar-lhe ar limpo e mantê-lo em repouso. Em casos graves como paragem cardio-respiratória, aplicar técnicas de respiração artificial (respiração boca-a-boca, massagem cardíaca, administração de oxigénio, etc.), solicitando assistência médica imediata.

**Por contacto com a pele:**

Pode provocar uma reação alérgica cutânea. Em caso de contacto, é recomendado limpar a zona afectada com água abundante e com sabão neutro. No caso de alterações na pele (ardor, vermelhidão, erupções cutâneas, bolhas, etc.), consultar o médico, apresentando esta Ficha de Dados de Segurança

**Por contacto com os olhos:**

Enxaguar os olhos com água em abundância à temperatura ambiente pelo menos durante 15 minutos. Evitar que o afectado esfregue ou feche os olhos. No caso, do afectado usar lentes de contacto, estas devem ser retiradas sempre que não estejam coladas aos olhos, pois, de outro modo, poderia produzir-se um dano adicional. Em todos os casos, depois da lavagem, deve consultar um médico o mais rapidamente possível com a FDS do produto.

**Por ingestão/aspiração:**

Não induzir o vômito, caso isto aconteça, manter a cabeça inclinada para a frente para evitar a aspiração. Manter o afectado em repouso. Enxaguar a boca e a garganta, porque existe a possibilidade de que tenham sido afectadas na ingestão.

- CONTINUA NA PÁGINA SEGUINTE -



#### SECÇÃO 4: MEDIDAS DE PRIMEIROS SOCORROS (continuação)

##### 4.2 Sintomas e efeitos mais importantes, tanto agudos como retardados:

Os efeitos agudos e retardados são os indicados nos pontos 2 e 11.

Sensação de aperto no peito, dificuldade respiratória e tosse.

##### 4.3 Indicações sobre cuidados médicos urgentes e tratamentos especiais necessários:

O produto pode irritar as vias respiratórias e/ou originar sensibilização da pele e das vias respiratórias.

O tratamento médico deve incidir no controlo dos sintomas apresentados. O período de assistência médica deverá ser determinado em função do grau de exposição e da gravidade dos sintomas apresentados.

#### SECÇÃO 5: MEDIDAS DE COMBATE A INCÊNDIOS

##### 5.1 Meios de extinção:

###### Meios de extinção adequados:

Produto não inflamável em condições normais de armazenamento, manipulação e uso. No caso de inflamação como consequência da manipulação, armazenamento ou uso indevido, utilizar preferencialmente extintores de pó polivalente (pó ABC), de acordo com o Regulamento de instalações de protecção contra incêndios.

###### Meios de extinção inadequados:

Não relevante

##### 5.2 Perigos especiais decorrentes da substância ou mistura:

Como consequência da combustão ou decomposição térmica são gerados subprodutos de reacção que podem ser altamente tóxicos e, consequentemente, podem apresentar um risco elevado para a saúde.

##### 5.3 Recomendações para o pessoal de combate a incêndios:

Em função da magnitude do incêndio, poderá ser necessário o uso de roupa protectora completa e equipamento de respiração autónomo. Dispor de um mínimo de instalações de emergência ou elementos de actuação (mantas ignífugas, farmácia portátil, etc.) conforme a Directiva 89/654/EC.

###### Disposições adicionais:

Actuar conforme o Plano de Emergência Interno e as Fichas Informativas sobre a actuação perante acidentes e outras emergências. Suprimir qualquer fonte de ignição. Em caso de incêndio, refrigerar os recipientes e tanques de armazenamento de produtos susceptíveis de inflamação, explosão ou "BLEVE" como consequência de elevadas temperaturas. Evitar o derrame dos produtos utilizados na extinção do incêndio no meio aquático.

#### SECÇÃO 6: MEDIDAS A TOMAR EM CASO DE FUGAS ACIDENTAIS

##### 6.1 Precauções individuais, equipamento de protecção e procedimentos de emergência:

###### Para o pessoal não envolvido na resposta à emergência:

Isolar as fugas sempre que não representar um risco adicional para as pessoas que desempenhem esta função. Perante a exposição potencial com o produto derramado, é obrigatório o uso de elementos de protecção pessoal (ver epígrafe 8). Evacuar a zona e manter as pessoas sem protecção afastadas.

###### Para o pessoal responsável pela resposta à emergência:

Ver SECÇÃO 8.

##### 6.2 Precauções a nível ambiental:

Evitar o derrame no meio aquático porque contém substâncias perigosas para o mesmo. Conter o produto absorvido em recipientes precintáveis. No caso de grandes derrames no meio aquático, notificar a autoridade competente.

##### 6.3 Métodos e materiais de confinamento e limpeza:

Recomenda-se:

Absorver o derrame através de areia ou absorvente inerte e transladar para um local seguro. Não absorver com serradura ou outros absorventes combustíveis. Para qualquer consideração relativa à eliminação, consultar a epígrafe 13.

##### 6.4 Remissão para outras secções:

Veja as secções 8 e 13.

#### SECÇÃO 7: MANUSEAMENTO E ARMAZENAGEM

##### 7.1 Precauções para um manuseamento seguro:

- CONTINUA NA PÁGINA SEGUINTE -



## SECÇÃO 7: MANUSEAMENTO E ARMAZENAGEM (continuação)

### A.- Precauções para a manipulação segura

Cumprir a legislação vigente em matéria de prevenção de riscos laborais. Manter os recipientes hermeticamente fechados. Controlar os derrames e resíduos, eliminando-os com métodos seguros (epígrafe 6). Evitar o derrame livre a partir do recipiente. Manter ordem e limpeza onde sejam manuseados produtos perigosos.

### B.- Recomendações técnicas para a prevenção de incêndios e explosões.

Produto não inflamável em condições normais de armazenamento, manipulação e uso. É recomendado que o produto seja transvazado a velocidades lentas para evitar a geração de cargas electrostáticas que possam afectar produtos inflamáveis. Consultar a epígrafe 10 sobre condições e matérias que devem ser evitadas.

### C.- Recomendações técnicas para prevenir riscos ergonómicos e toxicológicos.

Não comer nem beber durante o seu manuseamento, lavando as mãos posteriormente com produtos de limpeza adequados.

### D.- Recomendações técnicas para prevenir riscos meio ambientais.

É recomendado dispor de material absorvente nas imediações do produto (ver epígrafe 6.3)

## 7.2 Condições de armazenagem segura, incluindo eventuais incompatibilidades:

### A.- Medidas técnicas de armazenamento

Temperatura mínima: 15 °C

Temperatura máxima: 30 °C

Tempo máximo: 6 meses

### B.- Condições gerais de armazenamento.

Evitar fontes de calor, radiação, electricidade estática e o contacto com alimentos. Para informação adicional, ver epígrafe 10.5

### Outras informações:

O produto deve ser armazenado num local ventilado, em recipientes fechados, ao abrigo de humidade e de materiais incompatíveis (consultar secção 10). Manter os recipientes abertos a partir do momento em que se suspeite de contaminação com água. Caso se detecte aumento de pressão num recipiente, isolá-lo e libertar a pressão cuidadosamente.

## 7.3 Utilização(ões) final(is) específica(s):

Excepto as indicações já especificadas, não é necessário realizar nenhuma recomendação especial quanto às utilizações deste produto.

## SECÇÃO 8: CONTROLO DA EXPOSIÇÃO/PROTECÇÃO INDIVIDUAL

### 8.1 Parâmetros de controlo:

Substâncias cujos valores limite de exposição ocupacional devem ser controladas no ambiente de trabalho:

Não existem valores limites ambientais para as substâncias que constituem o produto.

#### DNEL (Trabalhadores):

Não relevante

#### DNEL (População):

Não relevante

#### PNEC:

| Identificação                                                          |               |               |                           |               |
|------------------------------------------------------------------------|---------------|---------------|---------------------------|---------------|
| Diisocianato de 2-metil-m-fenileno<br>CAS: 26471-62-5<br>EC: 247-722-4 | STP           | 1 mg/L        | Água doce                 | 0,013 mg/L    |
|                                                                        | Solo          | 1 mg/kg       | Água marinha              | 0,001 mg/L    |
|                                                                        | Intermitentes | 0,125 mg/L    | Sedimentos (Água doce)    | Não relevante |
|                                                                        | Oral          | Não relevante | Sedimentos (Água marinha) | Não relevante |

### 8.2 Controlo da exposição:

#### A.- Medidas de protecção individual, nomeadamente equipamentos de protecção individual

Como medida de prevenção recomenda-se a utilização de equipamentos de protecção individuais básicos, com o correspondente marcação CE. Para mais informações sobre os equipamentos de protecção individual (armazenamento, utilização, limpeza, manutenção, classe de protecção,...) consultar o folheto informativo fornecido pelo fabricante do EPI. As indicações contidas neste ponto referem-se ao produto puro. As medidas de protecção para o produto diluído podem variar em função do seu grau de diluição, uso, método de aplicação, etc. Para determinar o cumprimento de instalação de duches de emergência e/ou lava-olhos nos armazéns deve ter-se em conta a regulamentação referente ao armazenamento de produtos químicos aplicável em cada caso. Para mais informações ver epígrafe 7.1 e 7.2. Toda a informação aqui apresentada é uma recomendação, sendo necessário a sua implementação por parte dos serviços de prevenção de riscos laborais ao desconhecer as medidas de prevenção adicionais que a empresa possa dispor.



## SECÇÃO 8: CONTROLO DA EXPOSIÇÃO/PROTECÇÃO INDIVIDUAL (continuação)

### B.- Protecção respiratória:

| Pictograma                                                                                                                        | PPE                                         | Marcação                                                                          | Normas ECN          | Observações                                                                                                                                                                                                           |
|-----------------------------------------------------------------------------------------------------------------------------------|---------------------------------------------|-----------------------------------------------------------------------------------|---------------------|-----------------------------------------------------------------------------------------------------------------------------------------------------------------------------------------------------------------------|
| <br>Protecção obrigatória das vias respiratórias | Máscara auto-filtrante para gases e vapores |  | EN 405:2002+A1:2010 | Substituir quando detectar odor ou sabor do contaminante no interior da máscara ou adaptador facial. Quando o contaminante não tiver boas propriedades de aviso, recomenda-se a utilização de equipamentos isolantes. |

### C.- Protecção específica das mãos.

| Pictograma                                                                                                          | PPE                                                                                                                                       | Marcação                                                                          | Normas ECN          | Observações                                                   |
|---------------------------------------------------------------------------------------------------------------------|-------------------------------------------------------------------------------------------------------------------------------------------|-----------------------------------------------------------------------------------|---------------------|---------------------------------------------------------------|
| <br>Protecção obrigatória das mãos | Luvas de protecção química (Material: Polietileno de baixa densidade linear (LLPDE), Tempo de penetração: > 480 min, Espessura: 0,062 mm) |  | EN 420:2004+A1:2010 | Substituir as luvas perante qualquer indício de deterioração. |

Dado que o produto é uma mistura de diferentes materiais, a resistência do material das luvas não se pode calcular de antemão com total fiabilidade e, portanto, têm de ser controladas antes da sua aplicação.

### D.- Protecção ocular e facial

| Pictograma                                                                                                         | PPE                                          | Marcação                                                                           | Normas ECN                      | Observações                                                                                                                                            |
|--------------------------------------------------------------------------------------------------------------------|----------------------------------------------|------------------------------------------------------------------------------------|---------------------------------|--------------------------------------------------------------------------------------------------------------------------------------------------------|
| <br>Protecção obrigatória da cara | Óculos panorâmicos contra salpicos/projeções |  | EN 166:2002<br>EN ISO 4007:2018 | Limpar diariamente e desinfetar periodicamente de acordo com as instruções do fabricante. Recomenda-se a sua utilização, no caso de risco de salpicos. |

### E.- Protecção corporal

| Pictograma | PPE                                 | Marcação                                                                            | Normas ECN        | Observações                                                                                                                                                                                                                                                         |
|------------|-------------------------------------|-------------------------------------------------------------------------------------|-------------------|---------------------------------------------------------------------------------------------------------------------------------------------------------------------------------------------------------------------------------------------------------------------|
|            | Roupa de trabalho                   |  |                   | Substituir perante qualquer indício de deterioração. Para períodos de exposição prolongados ao produto por utilizadores profissionais/industriais é recomendável CE III, de acordo com as normas EN ISO 6529:2013, EN ISO 6530:2005, EN ISO 13688:2013, EN 464:1995 |
|            | Calçado de trabalho anti-derrapante |  | EN ISO 20347:2012 | Substituir perante qualquer indício de deterioração. Para períodos de exposição prolongados ao produto por utilizadores profissionais/industriais é recomendável CE III, de acordo com as normas EN ISO 20345:2012 e EN 13832-1:2007                                |

### F.- Medidas complementares de emergência

| Medida de emergência                                                                                      | Normas                                          | Medida de emergência                                                                                      | Normas                                         |
|-----------------------------------------------------------------------------------------------------------|-------------------------------------------------|-----------------------------------------------------------------------------------------------------------|------------------------------------------------|
| <br>Duche de segurança | ANSI Z358-1<br>ISO 3864-1:2011, ISO 3864-4:2011 | <br>Lavagem dos olhos | DIN 12 899<br>ISO 3864-1:2011, ISO 3864-4:2011 |

### Controlo da exposição ambiental:

Em virtude da legislação comunitária de protecção do meio ambiente, é recomendado evitar o derrame tanto do produto como da sua embalagem no meio ambiente. Para informação adicional, ver epígrafe 7.1.D

## SECÇÃO 9: PROPRIEDADES FÍSICO-QUÍMICAS

### 9.1 Informações sobre propriedades físicas e químicas de base:

Para obter informações completas ver a ficha técnica do produto.

#### Aspecto físico:

|                        |                |
|------------------------|----------------|
| Estado físico a 20 °C: | Líquido.       |
| Aspecto:               | Viscoso        |
| Cor:                   | Amarelado      |
| Odor:                  | Característico |

\*Não existem dados disponíveis a data da elaboração deste documento ou porque não é aplicável devido a natureza e perigo do produto

- CONTINUA NA PÁGINA SEGUINTE -

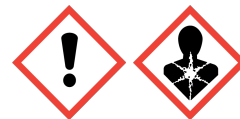

## SECÇÃO 9: PROPRIEDADES FÍSICO-QUÍMICAS (continuação)

|                                                |                                |
|------------------------------------------------|--------------------------------|
| Limiar olfativo:                               | Não relevante *                |
| <b>Volatilidade:</b>                           |                                |
| Temperatura de ebulição à pressão atmosférica: | Não relevante *                |
| Pressão de vapor a 25 °C:                      | Não relevante *                |
| Pressão de vapor a 50 °C:                      | Não relevante *                |
| Taxa de evaporação a 25 °C:                    | Não relevante *                |
| <b>Caracterização do produto:</b>              |                                |
| Densidade a 25 °C:                             | 1000 - 1040 kg/m <sup>3</sup>  |
| Densidade relativa a 25 °C:                    | Não relevante *                |
| Viscosidade dinâmica a 25 °C:                  | 3000 - 8000 cP                 |
| Viscosidade cinemática a 25 °C:                | Não relevante *                |
| Viscosidade cinemática a 40 °C:                | 2900 - 4900 mm <sup>2</sup> /s |
| Concentração:                                  | Não relevante *                |
| pH:                                            | Não relevante *                |
| Densidade do vapor a 25 °C:                    | Não relevante *                |
| Coefficiente de partição n-octanol/água:       | Não relevante *                |
| Solubilidade em água a 25 °C:                  | Não relevante *                |
| Propriedade de solubilidade:                   | Imiscível                      |
| Temperatura de decomposição:                   | Não relevante *                |
| Ponto de fusão/ponto de congelação:            | Não relevante *                |
| <b>Inflamabilidade:</b>                        |                                |
| Temperatura de inflamação:                     | Não inflamável (>60 °C)        |
| Inflamabilidade (sólido, gás):                 | Não relevante *                |
| Temperatura de auto-ignição:                   | Não relevante *                |
| Limite de inflamabilidade inferior:            | Não relevante *                |
| Limite de inflamabilidade superior:            | Não relevante *                |
| <b>Características das partículas:</b>         |                                |
| Diâmetro equivalente mediano:                  | Não aplicável                  |

### 9.2 Outras informações:

#### Informações relativas às classes de perigo físico:

|                                                                    |                 |
|--------------------------------------------------------------------|-----------------|
| Propriedades explosivas:                                           | Não relevante * |
| Propriedades comburentes:                                          | Não relevante * |
| Corrosivos para os metais:                                         | Não relevante * |
| Calor de combustão:                                                | Não relevante * |
| Aerossóis-percentagem total (em massa) de componentes inflamáveis: | Não relevante * |

#### Outras características de segurança:

|                             |                 |
|-----------------------------|-----------------|
| Tensão superficial a 25 °C: | Não relevante * |
| Índice de refração:         | Não relevante * |

\*Não existem dados disponíveis a data da elaboração deste documento ou porque não é aplicável devido a natureza e perigo do produto

## SECÇÃO 10: ESTABILIDADE E REATIVIDADE

### 10.1 Reactividade:

Não se esperam reacções perigosas se cumprirem as instruções técnicas de armazenamento de produtos químicos.

### 10.2 Estabilidade química:

Quimicamente estável nas condições de manuseamento, armazenamento e utilização.

- CONTINUA NA PÁGINA SEGUINTE -



## SECÇÃO 10: ESTABILIDADE E REATIVIDADE (continuação)

### 10.3 Possibilidade de reações perigosas:

Sob as condições não são esperadas reacções perigosas para produzir uma pressão ou temperaturas excessivas.

### 10.4 Condições a evitar:

Aplicáveis para manipulação e armazenamento à temperatura ambiente:

| Choque e fricção | Contacto com o ar | Aquecimento               | Luz Solar     | Humidade                  |
|------------------|-------------------|---------------------------|---------------|---------------------------|
| Não aplicável    | Não aplicável     | Evitar incidência directa | Não aplicável | Evitar incidência directa |

### 10.5 Materiais incompatíveis:

| Ácidos    | Água                      | Matérias comburentes      | Matérias combustíveis | Outros                                                                        |
|-----------|---------------------------|---------------------------|-----------------------|-------------------------------------------------------------------------------|
| Precaução | Evitar incidência directa | Evitar incidência directa | Não aplicável         | Evitar alcalinos, metais pesados, agentes reductores, acelerante de peróxidos |

### 10.6 Produtos de decomposição perigosos:

Na presença de altas temperaturas, nomeadamente durante incêndios, poderão libertar-se vapores de TDI e formarem-se óxidos de azoto (NOx) e vestígios de cianeto de hidrogénio (HCN).

## SECÇÃO 11: INFORMAÇÃO TOXICOLÓGICA

### 11.1 Informações sobre as classes de perigo, tal como definidas no Regulamento (CE) n.º 1272/2008:

Não se dispõem de dados experimentais do produto em si relativamente às propriedades toxicológicas

#### Efeitos perigosos para a saúde:

Em caso de exposição repetitiva, prolongada ou a concentrações superiores às estabelecidas pelos limites de exposição ocupacional, podem ocorrer efeitos adversos para a saúde em função da via de exposição:

#### A- Ingestão (efeito agudo):

- Toxicidade aguda: Com base nos dados disponíveis, os critérios de classificação não são preenchidos e não apresenta substâncias classificadas como perigosas por ingestão. Para mais informação, ver epígrafe 3.
- Corrosividade/Irritação: Com base nos dados disponíveis, os critérios de classificação não são preenchidos, no entanto apresenta substâncias classificadas como perigosas para este artigo. Para mais informações ver epígrafe 3.

#### B- Inalação (efeito agudo):

- Toxicidade aguda: Uma exposição a altas concentrações pode motivar depressão do sistema nervoso central, ocasionando dor de cabeça, tonturas, vertigens, náuseas, vômitos, confusão e, no caso de afecção grave, a perda de consciência.
- Corrosividade/Irritação: Com base nos dados disponíveis, os critérios de classificação não são preenchidos, no entanto, apresenta substâncias classificadas como perigosas por inalação. Para mais informação, ver epígrafe 3.

#### C- Contacto com a pele e os olhos. (efeito agudo):

- Contato com a pele: Com base nos dados disponíveis, os critérios de classificação não são preenchidos, no entanto, apresenta substâncias classificadas como perigosas por contacto com a pele. Para mais informação, ver epígrafe 3.
- Contato com os olhos: Lesões oculares após o contacto

#### D- Efeitos CMR (carcinogenicidade, mutagenicidade e toxicidade para a reprodução):

- Carcinogenicidade: Com base nos dados disponíveis, os critérios de classificação não são preenchidos, no entanto, apresenta substâncias classificadas como perigosas com efeitos cancerígenos. Para mais informação, ver epígrafe 3.
- IARC: Diisocianato de 2-metil-m-fenileno (2B)
- Mutagenicidade: Com base nos dados disponíveis, os critérios de classificação não são preenchidos, não apresentando substâncias classificadas como perigosas para este artigo. Para mais informações ver epígrafe 3.
- Toxicidade pela reprodução: Com base nos dados disponíveis, os critérios de classificação não são preenchidos, não apresentando substâncias classificadas como perigosas para este artigo. Para mais informações ver epígrafe 3.

#### E- Efeitos de sensibilização:

- Respiratória: A exposição prolongada pode resultar em hipersensibilidade respiratória específica.
- Cutânea: O contacto prolongado com a pele pode derivar em episódios de dermatites alérgicas de contacto.

#### F- Toxicidade para órgãos-alvo específicos (STOT), tempo de exposição:

Com base nos dados disponíveis, os critérios de classificação não são preenchidos, no entanto, apresenta substâncias classificadas como perigosas por inalação. Para mais informação, ver epígrafe 3.

#### G- Toxicidade para órgãos-alvo específicos (STOT), a exposição repetida:

- CONTINUA NA PÁGINA SEGUINTE -



## SECÇÃO 11: INFORMAÇÃO TOXICOLÓGICA (continuação)

- Toxicidade para órgãos-alvo específicos (STOT), a exposição repetida: Com base nos dados disponíveis, os critérios de classificação não são preenchidos, não apresentando substâncias classificadas como perigosas para este artigo. Para mais informações ver epígrafe 3.
- Pele: Com base nos dados disponíveis, os critérios de classificação não são preenchidos, não apresentando substâncias classificadas como perigosas para este artigo. Para mais informações ver epígrafe 3.

### H- Perigo de aspiração:

Com base nos dados disponíveis, os critérios de classificação não são preenchidos, não apresentando substâncias classificadas como perigosas para este artigo. Para mais informações ver epígrafe 3.

### Outras informações:

#### DADOS PARA A SUBSTÂNCIA 2,4/2,6-DIISOCIANATO DE TOLUENO (CAS 26471-52-5)

Corrosão /irritação cutânea: coelho

Resultado: fortemente irritante

Classificação: Provoca irritação cutânea.

Lesões oculares graves/irritação ocular: coelho

Resultado: fortemente irritante

Classificação: Provoca irritação ocular grave.

Sensibilização respiratória

Classificação: Pode causar sensibilização por inalação.

Classificação de acordo com a Diretiva 2006/121/CE Anexo VI.

O TDI é um sensibilizador respiratório potencial tanto com homens como com animais. Os estudos com animais indicaram que certas reacções indicadoras de sensibilização respiratória podem ser induzidas se o TDI estiver em contacto com a pele, mas não está claro a forma em que isso se pode relacionar à asma induzida aos homens. A relação entre a ocorrência da exposição e da sensibilização ainda não foi exprimido numericamente (concentração, duração, medida da exposição, via de exposição).

Sensibilização cutânea (Teste dos gânglios linfáticos locais (LLNA)): rato

Resultado: positivo

Classificação: Pode causar sensibilização em contato com a pele.

Método: OECD TG 429

Os dados dos estudos com animais comprovaram de forma clara que o TDI causa sensibilização cutânea e respiratória. As experiências com seres humanos comprovam de forma clara a sensibilização respiratória, mas descrevem poucas vezes sensibilização cutânea. Devido ao risco de sensibilização no posto de trabalho é preciso ter medidas de protecção específicas a nível quotidiano na indústria química, inclusive o uso de luvas de protecção e ventilação adequada.

Mutagenicidade em células germinativas:

Mutação genética, in vitro:

Tipo de teste: Teste de salmonelas/microsomas (teste Ames)

Sistema de teste: Salmonella typhimurium

Ativação metabólica: sem

Resultado: negativo

Método: OECD TG 471

Aberração cromossómica, in vivo:

Tipo de teste: Teste em micronúcleo

Espécie: rato, macho/fêmea

Via de aplicação: Inalante

Duração da exposição: 6 h

Resultado: negativo

Método: OECD TG 474

Substância de teste: como o vapor

Carcinogenicidade: ratazana, macho/fêmea

Via de aplicação: Inalante

Doses: 0 - 0,05 - 0,15 ppm

Substância de teste: como o vapor

Duração da exposição: 2 anos

Frequência do tratamento: 6 horas/dia, 5 dias/semana

Método: Diretrizes do Teste OECD 453

Sem aumento na incidência de tumores.

Toxicidade reprodutiva:

Não foi classificado em classes de perigos. Dados insuficientes para os critérios da classificação. Conforme a classificação da directiva nº

- CONTINUA NA PÁGINA SEGUINTE -



**SECÇÃO 11: INFORMAÇÃO TOXICOLÓGICA (continuação)**

67/548/EEC (segundo a qual a sua classificação é R52-53) e do regulamento nº 1271/2008 do Parlamento Europeu e do Conselho, relativo à classificação, rotulagem e embalagem de substâncias e misturas não tem efeito nocivo sobre a reprodução.

Resumo da avaliação das propriedades CMR:

Carcinogenicidade: Os testes em animais não revelaram efeitos carcinogénicos após a inalação. A União Europeia classifica este produto como carcinogénico. Suspeito de provocar câncer. (Carc. 2).

Mutagenicidade: Os testes in vitro mostraram efeitos mutagénicos que não foram observados no teste in vivo. Com base nos dados disponíveis, os critérios de classificação não são preenchidos.

Teratogenicidade: Não evidencia efeitos teratogénicos em experiências com animais. Com base nos dados disponíveis, os critérios de classificação não são preenchidos.

Toxicidade reprodutiva/Fertilidade: Os testes sobre os animais não mostraram efeitos sobre a fecundidade. Com base nos dados disponíveis, os critérios de classificação não são preenchidos.

Toxicidade para órgãos-alvo específicos (STOT) - exposição única

Rota de exposição: Inalante

Órgãos alvo: Trato respiratório

Pode provocar irritação das vias respiratórias.

Toxicidade para órgãos-alvo específicos (STOT) - exposição repetida

De acordo com a directiva nº 67/548/EEC a sua classificação apropriada é R37 por causa da irritação local das vias respiratórias, e de acordo com o regulamento (CE) nº 1272/2008 (CLP) pertence à categoria STOT 3.

Perigo de aspiração

Conforme a directiva nº 67/548/EEC e do regulamento nº 1272/2008 do Parlamento Europeu e do Conselho, relativo à classificação, rotulagem e embalagem de substâncias e misturas não pode ser classificado como substância que causa toxicidade sistémica. O método mais apropriado da avaliação do risco profissional sobre homens é a inalação. No caso de animais a exposição repetitiva ao TDI limita-se ao efeito sobre os órgãos respiratórios causado por irritação local. Não foram observados sinais indicadores de toxicidade sistémica. Das vias de exposição a ingestão e o contacto por pele não são relevantes do ponto de vista da avaliação.

**Informação toxicológica específica das substâncias:**

| Identificação                                                          | Toxicidade aguda |                 | Género   |
|------------------------------------------------------------------------|------------------|-----------------|----------|
| Pré-polímero base TDI<br>CAS: Não aplicável<br>EC: 942-873-9           | DL50 oral        | >2000 mg/kg     |          |
|                                                                        | DL50 cutânea     | >2000 mg/kg     |          |
|                                                                        | CL50 inalação    | Não relevante   |          |
| Diisocianato de 2-metil-m-fenileno<br>CAS: 26471-62-5<br>EC: 247-722-4 | DL50 oral        | 3360 mg/kg      | Ratazana |
|                                                                        | DL50 cutânea     | >2000 mg/kg     |          |
|                                                                        | CL50 inalação    | 0,11 mg/L (4 h) | Ratazana |

**11.2 Informações sobre outros perigos:**

**Propriedades desreguladoras do sistema endócrino**

O produto não cumpre os critérios devido às suas propriedades de alteração endócrina.

**Outras informações**

Não relevante



## SECÇÃO 12: INFORMAÇÃO ECOLÓGICA

Não se dispõem de dados experimentais do produto em si relativamente às propriedades ecotoxicológicas

**12.1 Toxicidade:****Toxicidade aguda:**

| Identificação                      | Concentração |                  | Espécie             | Género    |
|------------------------------------|--------------|------------------|---------------------|-----------|
| Diisocianato de 2-metil-m-fenileno | CL50         | 133 mg/L (96 h)  | Oncorhynchus mykiss | Peixe     |
| CAS: 26471-62-5                    | EC50         | 12,5 mg/L (48 h) | Daphnia magna       | Crustáceo |
| EC: 247-722-4                      | EC50         | 4300 mg/L (96 h) | Chlorella vulgaris  | Alga      |

**Toxicidade a longo prazo:**

| Identificação                      | Concentração |               | Espécie       | Género    |
|------------------------------------|--------------|---------------|---------------|-----------|
| Diisocianato de 2-metil-m-fenileno | NOEC         | Não relevante |               |           |
| CAS: 26471-62-5 EC: 247-722-4      | NOEC         | 1,1 mg/L      | Daphnia magna | Crustáceo |

**DADOS PARA A SUBSTÂNCIA 2,4/2,6-DIISOCIANATO DE TOLUENO (CAS 26471-52-5)**

Toxicidade em organismos do solo: NOEC (mortalidade) >1000 mg/kg (Eisenia fetida - minhocas; 14d; OCDE 207)

Toxicidade para as plantas terrestres: NOEC (emergência de plântulas) >1000 mg/kg (avena sativa - aveia; 17d; OCDE208)

NOEC (proporção de crescimento) >1000 mg/kg (avena sativa - aveia; 17d; OCDE208)

NOEC (emergência de plântulas) >1000 mg/kg (lactuca sativa - alface; 17d; OCDE208)

NOEC (proporção de crescimento) >1000 mg/kg (lactuca sativa - alface; 17d; OCDE208)

Conclusão referente à classificação: Perigo para o ambiente aquático (agudo) categoria 3.

Perigo para o ambiente aquático (crónico) categoria 3. Dados insuficientes para os critérios de classificação mas conforme a classificação da directiva 67/548/CE e do Regulamento 1272/2008.

**12.2 Persistência e degradabilidade:**

DADOS PARA A SUBSTÂNCIA 2,4/2,6-DIISOCIANATO DE TOLUENO (CAS 26471-52-5)

Biodegradabilidade: 0%, 28 d, ou seja, não inerentemente degradável

Estabilidade na água: Semi-vida de 0,5h (hidrólise a 27°C)

Fotodegradabilidade: meia-vida de 2 dias (fototransformação no ar a 25°C; radicais HO)

**12.3 Potencial de bioacumulação:**

DADOS PARA A SUBSTÂNCIA 2,4/2,6-DIISOCIANATO DE TOLUENO (CAS 26471-52-5)

O TDI é extremamente instável em meio aquático, pois reage com a água formando polícarbamida inactiva de alto peso molecular e vestígios de toluenodiamina (TDA).

coeficiente partição (n-octanol/água) - log Pow: 3,43 a 22°C

**12.4 Mobilidade no solo:**



## SECÇÃO 12: INFORMAÇÃO ECOLÓGICA (continuação)

O TDI é extremamente instável em meio aquático, pois reage com a água formando policarbamida inactiva de alto peso molecular e vestígios de toluenodiamina (TDA).

O TDI hidroliza-se rapidamente em solução aquosa, sendo o seu tempo de meia-vida de menos de 1 minuto.

O TDI é ao mesmo tempo um material hidrófobo. Mistura-se mal com a água e por isso a sua reacção heterogénea com a água dos solos é menos rápida. O produto principal dessas reacções é policarbamida insolúvel.

### 12.5 Resultados da avaliação PBT e mPmB:

O produto não atende aos critérios PBT/mPmB

### 12.6 Propriedades desreguladoras do sistema endócrino:

O produto não cumpre os critérios devido às suas propriedades de alteração endócrina.

### 12.7 Outros efeitos adversos:

Não descritos

## SECÇÃO 13: CONSIDERAÇÕES RELATIVAS À ELIMINAÇÃO

### 13.1 Métodos de tratamento de resíduos:

| Código   | Descrição                                                | Tipo de resíduo (Regulamento (UE) n.º 1357/2014) |
|----------|----------------------------------------------------------|--------------------------------------------------|
| 08 04 10 | resíduos de colas e vedantes, não abrangidos em 08 04 09 | Perigoso                                         |

#### Tipo de resíduo (Regulamento (UE) n.º 1357/2014):

HP6 Toxicidade aguda, HP13 Sensibilizante, HP4 Irritante — irritação cutânea e lesões oculares

#### Gestão do resíduo (eliminação e valorização):

Consultar o gestor de resíduos autorizado para as operações de valorização e eliminação, conforme o Anexo 1 e Anexo 2 (Directiva 2008/98/CE, Decreto-Lei n.º 102-D/2020). De acordo com os códigos 15 01 (Decisão da Comissão 2014/955/UE), no caso da embalagem ter estado em contacto directo com o produto, esta será tratada do mesmo modo como o próprio produto, caso contrário será tratada com resíduo não perigoso. Não se aconselha a descarga através das águas residuais. Ver epígrafe 6.2.

#### Disposições relacionadas com a gestão de resíduos:

De acordo com o Anexo II do Regulamento (EC) n.º 1907/2006 (REACH) são apresentadas as disposições comunitárias ou estatais relacionadas com a gestão de resíduos.

Legislação comunitária: Directiva 2008/98/EC, Decisão da Comissão 2014/955/UE, Regulamento (UE) n.º 1357/2014

Legislação nacional: Decreto-Lei n.º 102-D/2020

## SECÇÃO 14: INFORMAÇÕES RELATIVAS AO TRANSPORTE

### Transporte terrestre de mercadorias perigosas:

Em aplicação do ADR 2021 e RID 2021:

- |             |                                                                                 |               |
|-------------|---------------------------------------------------------------------------------|---------------|
| <b>14.1</b> | <b>Número ONU ou número de ID:</b>                                              | Não relevante |
| <b>14.2</b> | <b>Designação oficial de transporte da ONU:</b>                                 | Não relevante |
| <b>14.3</b> | <b>Classes de perigo para efeitos de transporte:</b>                            | Não relevante |
|             | Etiquetas:                                                                      | Não relevante |
| <b>14.4</b> | <b>Grupo de embalagem:</b>                                                      | Não relevante |
| <b>14.5</b> | <b>Perigos para o ambiente:</b>                                                 | Não           |
| <b>14.6</b> | <b>Precauções especiais para o utilizador</b>                                   |               |
|             | Disposições especiais:                                                          | Não relevante |
|             | Código de Restrição em túneis:                                                  | Não relevante |
|             | Propriedades físico-químicas:                                                   | Ver secção 9  |
|             | Quantidades Limitadas:                                                          | Não relevante |
| <b>14.7</b> | <b>Transporte marítimo a granel em conformidade com os instrumentos da OMI:</b> | Não relevante |

### Transporte de mercadorias perigosas por mar:

Em aplicação ao IMDG 39-18:



#### SECÇÃO 14: INFORMAÇÕES RELATIVAS AO TRANSPORTE (continuação)

- |             |                                                                                 |               |
|-------------|---------------------------------------------------------------------------------|---------------|
| <b>14.1</b> | <b>Número ONU ou número de ID:</b>                                              | Não relevante |
| <b>14.2</b> | <b>Designação oficial de transporte da ONU:</b>                                 | Não relevante |
| <b>14.3</b> | <b>Classes de perigo para efeitos de transporte:</b>                            | Não relevante |
|             | Etiquetas:                                                                      | Não relevante |
| <b>14.4</b> | <b>Grupo de embalagem:</b>                                                      | Não relevante |
| <b>14.5</b> | <b>Poluente marinho:</b>                                                        | Não           |
| <b>14.6</b> | <b>Precauções especiais para o utilizador</b>                                   |               |
|             | Disposições especiais:                                                          | Não relevante |
|             | Códigos EmS:                                                                    |               |
|             | Propriedades físico-químicas:                                                   | Ver secção 9  |
|             | Quantidades Limitadas:                                                          | Não relevante |
|             | Grupo de segregação:                                                            | Não relevante |
| <b>14.7</b> | <b>Transporte marítimo a granel em conformidade com os instrumentos da OMI:</b> | Não relevante |

##### Transporte de mercadorias perigosas por ar:

Em aplicação ao IATA/ICAO 2021:

- |             |                                                                                 |               |
|-------------|---------------------------------------------------------------------------------|---------------|
| <b>14.1</b> | <b>Número ONU ou número de ID:</b>                                              | Não relevante |
| <b>14.2</b> | <b>Designação oficial de transporte da ONU:</b>                                 | Não relevante |
| <b>14.3</b> | <b>Classes de perigo para efeitos de transporte:</b>                            | Não relevante |
|             | Etiquetas:                                                                      | Não relevante |
| <b>14.4</b> | <b>Grupo de embalagem:</b>                                                      | Não relevante |
| <b>14.5</b> | <b>Perigos para o ambiente:</b>                                                 | Não           |
| <b>14.6</b> | <b>Precauções especiais para o utilizador</b>                                   |               |
|             | Propriedades físico-químicas:                                                   | Ver secção 9  |
| <b>14.7</b> | <b>Transporte marítimo a granel em conformidade com os instrumentos da OMI:</b> | Não relevante |

#### SECÇÃO 15: INFORMAÇÃO SOBRE REGULAMENTAÇÃO

##### 15.1 Regulamentação/legislação específica para a substância ou mistura em matéria de saúde, segurança e ambiente:

Substâncias candidatas a autorização no Regulamento (CE) 1907/2006 (REACH): Não relevante

Substâncias incluídas no Anexo XIV do REACH (lista de autorização) e data de validade: Não relevante

Regulamento (CE) 1005/2009, sobre substâncias que esgotam a camada de ozono: Não relevante

Artigo 95, Regulamento (UE) Nº 528/2012: Não relevante

REGULAMENTO (UE) N.º 649/2012, relativo à exportação e importação de produtos químicos perigosos: Não relevante

##### DL 150/2015 (SEVESO III):

Não relevante

Limitações à comercialização e ao uso de determinadas substâncias e misturas perigosas (Anexo XVII REACH, etc...):

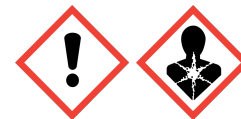

## SECÇÃO 15: INFORMAÇÃO SOBRE REGULAMENTAÇÃO (continuação)

Não podem ser utilizadas em:

- objectos decorativos destinados à produção de efeitos de luz ou de cor obtidos por meio de fases diferentes, por exemplo em candeeiros decorativos e cinzeiros,
- máscaras e partidas,
- jogos para um ou mais participantes ou quaisquer objectos destinados a ser utilizados como tais, mesmo com aspectos decorativos.

Contém Diisocianato de 2-metil-m-fenileno em quantidade superior a 0,1 % peso. 1. Não podem ser utilizados como substâncias, estremes, como constituintes de outras substâncias ou em misturas destinadas a utilização(ões) industrial(ais) e profissional (ais) após 24 de agosto de 2023, a menos que:

- a) a concentração de diisocianatos individualmente e em combinação seja inferior a 0,1% em peso  
ou

- b) a entidade patronal ou o trabalhador por conta própria assegure que o(s) utilizador (es) industrial(ais) ou profissional(ais) concluíram com sucesso formação sobre a utilização segura de diisocianatos, antes da utilização da(s) substância(s) ou mistura(s).

2. Não podem ser colocados no mercado como substâncias, estremes, como constituintes de outras substâncias ou em misturas destinadas a utilização(ões) industrial(ais) e profissional(ais) após 24 de fevereiro de 2022, a menos que:

- a) a concentração de diisocianatos individualmente e em combinação seja inferior a 0,1 % em peso  
ou

- b) o fornecedor assegure que o destinatário da(s) substância(s) ou mistura(s) dispõe de informações sobre os requisitos referidos no n.o 1, alínea b), e que é inserida na embalagem a seguinte menção, de forma claramente distinta das restantes informações do rótulo: «A partir de 24 de agosto de 2023, é necessária formação adequada antes da utilização industrial ou profissional».

3. Para efeitos da presente entrada, «utilizador(es) industrial(ais) e profissional(ais)» designa qualquer trabalhador por conta de outrem ou trabalhador por conta própria que manuseie diisocianatos, estremes, como constituintes de outras substâncias ou em misturas destinadas a utilização(ões) industrial(ais) e profissional(ais), ou que supervisione estas tarefas.

4. A formação referida no n.o 1, alínea b), deve incluir as instruções para o controlo da exposição cutânea e por inalação aos diisocianatos no local de trabalho, sem prejuízo de qualquer valor-limite de exposição profissional nacional ou de outras medidas de gestão dos riscos adequadas a nível nacional. Essa formação deve ser realizada por um perito em matéria de segurança e saúde no trabalho com competência adquirida por formação profissional relevante. Essa formação deve abranger, no mínimo:

- a) os elementos de formação referidos no n.o 5, alínea a), para todas as utilizações industriais e profissionais

- b) os elementos de formação referidos no n.o 5, alíneas a) e b), para as seguintes utilizações:

- manuseamento de misturas abertas à temperatura ambiente (incluindo túneis de espuma),
- pulverização em cabine ventilada,
- aplicação por meio de rolo,
- aplicação por meio de pincel,
- aplicação por imersão e vazamento,
- pós-tratamento mecânico (por exemplo, corte) de artigos não totalmente curados que já não estão quentes,
- limpeza e resíduos,
- outras utilizações com uma exposição semelhante por via cutânea e/ou por inalação

- c) os elementos de formação referidos no n.o 5, alíneas a), b) e c), para as seguintes utilizações:

- manuseamento de artigos de cura incompleta (por exemplo, recentemente curados, ainda quentes),
- aplicações de fundição,
- manutenção e reparação que necessitem de acesso ao equipamento,
- manuseamento aberto de formulações quentes ou muito quentes (> 45 °C),
- pulverização ao ar livre, com ventilação limitada ou apenas natural (inclui grandes pavilhões de trabalho industriais) e pulverização com alta energia (por exemplo, espumas, elastómeros),
- e outras utilizações com uma exposição semelhante através da via cutânea e/ou por inalação.

5. Elementos da formação:

- a) formação geral, incluindo formação via internet, sobre:

- química dos diisocianatos,
- perigos de toxicidade (incluindo toxicidade aguda),
- exposição aos diisocianatos,
- valores-limite de exposição profissional,
- a forma como a sensibilização se pode desenvolver,
- cheiro como indicação de perigo,
- importância da volatilidade para o risco,
- viscosidade, temperatura e peso molecular dos diisocianatos,
- higiene pessoal,
- o equipamento de proteção individual necessário, incluindo as instruções práticas para a sua correta utilização e as suas limitações,
- riscos de contacto cutâneo e exposição por inalação,
- riscos em relação ao processo de aplicação utilizado,
- sistema de proteção da pele e da inalação,
- ventilação,
- limpeza, fugas e manutenção,
- descartar embalagens vazias,
- proteção de pessoas que se encontrem nas proximidades,
- identificação das fases críticas de manuseamento,

- CONTINUA NA PÁGINA SEGUINTE -

**SECÇÃO 15: INFORMAÇÃO SOBRE REGULAMENTAÇÃO (continuação)**

- sistemas de códigos nacionais específicos (se aplicável),
  - segurança baseada no comportamento,
  - certificação ou prova documentada de que a formação foi concluída com sucesso.
- b) formação de nível intermédio, incluindo formação via internet, sobre:
- aspetos adicionais baseados no comportamento,
  - manutenção,
  - gestão da mudança,
  - avaliação das instruções de segurança existentes,
  - riscos em relação ao processo de aplicação utilizado,
  - certificação ou prova documentada de que a formação foi concluída com sucesso.
- c) formação avançada, incluindo formação via internet sobre:
- qualquer certificação adicional necessária para as utilizações específicas abrangidas,
  - pulverização fora de uma cabine de pulverização,
  - manuseamento aberto de formulações quentes ou muito quentes (> 45 °C),
  - certificação ou prova documentada de que a formação foi concluída com sucesso.
6. A formação deve cumprir as disposições estabelecidas pelo Estado-Membro em que operam os utilizadores industriais ou profissionais. Os Estados-Membros podem implementar ou continuar a aplicar os seus próprios requisitos nacionais relativos à utilização da(s) substância(s) ou mistura(s), desde que sejam satisfeitos os requisitos mínimos estabelecidos nos n.os 4 e 5.
7. O fornecedor a que se refere o n.o 2, alínea b), deve assegurar que o destinatário recebe o material e os cursos de formação nos termos dos n.os 4 e 5 na língua ou línguas oficiais do(s) Estado(s)-Membro(s) onde a(s) substância(s) ou a(s) mistura(s) são fornecidas. A formação deve ter em conta a especificidade dos produtos fornecidos, incluindo a composição, a embalagem e a conceção.
8. A entidade patronal ou o trabalhador por conta própria deve documentar a conclusão bem-sucedida da formação referida nos n.os 4 e 5. A formação é renovada, pelo menos, de cinco em cinco anos.
9. Os Estados-Membros devem incluir nos seus relatórios, de acordo com o artigo 117.o, n.o 1, as seguintes informações:
- a) quaisquer requisitos de formação estabelecidos e outras medidas de gestão dos riscos relacionadas com as utilizações industriais e profissionais dos diisocianatos previstos na legislação nacional, b) o número de casos de asma profissional e de doenças respiratórias e cutâneas profissionais comunicadas e reconhecidas relativamente aos diisocianatos,
  - c) os limites nacionais de exposição aos diisocianatos, caso existam,
  - d) as informações sobre as atividades de controlo do cumprimento relacionadas com esta restrição.
10. Esta restrição aplica-se sem prejuízo de outra legislação da União relativa à proteção da segurança e da saúde dos trabalhadores no local de trabalho.

**Disposições particulares em matéria de protecção das pessoas ou do meio ambiente:**

É recomendado utilizar a informação recompilada nesta ficha de dados de segurança como dados de entrada numa avaliação de riscos das circunstâncias locais com o objectivo de estabelecer as medidas necessárias de prevenção de riscos para o manuseamento, utilização, armazenamento e eliminação deste produto.

**Outras legislações:**

Decreto-Lei n.º 220/2012, de 10 de outubro, que assegura a execução na ordem jurídica interna das obrigações decorrentes do Regulamento (CE) n.º 1272/2008, do Parlamento Europeu e do Conselho, de 16 de dezembro, relativo à classificação, rotulagem e embalagem de substâncias e misturas, que altera e revoga as Diretivas n.os 67/548/CEE e 1999/45/CE e altera o Regulamento (CE) n.º 1907/2006.

Decreto-Lei n.º 293/2009, de 13 de Outubro, que assegura a execução, na ordem jurídica nacional, das obrigações decorrentes do Regulamento (CE) n.º 1907/2006, do Parlamento Europeu e do Conselho, de 18 de Dezembro, relativo ao registo, avaliação, autorização e restrição dos produtos químicos (REACH) e que procede à criação da Agência Europeia dos Produtos Químicos.

Decreto-Lei n.º 33/2015, de 4 de março - Estabelece obrigações relativas à exportação e importação de produtos químicos perigosos, assegurando a execução, na ordem jurídica interna do Regulamento (UE) n.º 649/2012, do Parlamento Europeu e do Conselho.

Decreto-Lei 41-A/2010 de 29 de Abril que regulamenta o transporte rodoviário e ferroviário de mercadorias perigosas.

Decreto-Lei n.º 147/2008 de 29 de Julho, estabelece o regime jurídico da responsabilidade por danos ambientais e transpõe para a ordem jurídica interna a Directiva n.º 2004/35/CE, do Parlamento Europeu e do Conselho.

Decreto-Lei n.º 24/2012 de 6 de Fevereiro, alterado pelo D.L. n.º 88/2015 de 28 de Maio, pelo D.L. n.º 41/2018 de 11 de Junho e pelo D.L. n.º 1/2021 de 6 de Janeiro. Consolida as prescrições mínimas em matéria de protecção dos trabalhadores contra os riscos para a segurança e a saúde devido à exposição a agentes químicos no trabalho e transpõe a Directiva n.º 2009/161/UE, da Comissão, de 17 de Dezembro de 2009.

Decreto-Lei n.º 102-D/2020, de 10 de Dezembro - Aprova o regime geral da gestão de resíduos, o regime jurídico da deposição de resíduos em aterro e altera o regime da gestão de fluxos específicos de resíduos, transpondo as Diretivas (UE) 2018/849, 2018/850, 2018/851 e 2018/852.

Decisão da Comissão 2014/955/EU - Lista Europeia de Resíduos.

**15.2 Avaliação da segurança química:**

O fornecedor não realizou avaliação de segurança química.

**SECÇÃO 16: OUTRAS INFORMAÇÕES**

Legislação aplicável a ficha de dados de segurança:

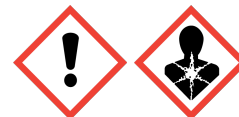

## SECÇÃO 16: OUTRAS INFORMAÇÕES (continuação)

Esta ficha de dados de segurança foi desenvolvida em conformidade com o ANEXO II - Guia para a elaboração de Fichas de Dados de Segurança do Regulamento (EC) Nº 1907/2006 (REGULAMENTO (UE) 2020/878 DA COMISSÃO)

**Modificações relativas à ficha de segurança anterior que afectam as medidas de gestão de risco:**

REGULAMENTO (UE) 2020/878 DA COMISSÃO

**Textos das frases contempladas na secção 2:**

H334: Quando inalado, pode provocar sintomas de alergia ou de asma ou dificuldades respiratórias.

H317: Pode provocar uma reacção alérgica cutânea.

H332: Nocivo por inalação.

H319: Provoca irritação ocular grave.

**Textos das frases contempladas na secção 3:**

As frases indicadas não se referem ao produto em si, são apenas a título informativo e fazem referência aos componentes individuais que aparecem na secção 3

**Regulamento nº1272/2008 (CLP):**

Acute Tox. 1: H330 - Mortal por inalação.

Aquatic Chronic 3: H412 - Nocivo para os organismos aquáticos com efeitos duradouros.

Carc. 2: H351 - Suspeito de provocar cancro.

Eye Irrit. 2: H319 - Provoca irritação ocular grave.

Resp. Sens. 1: H334 - Quando inalado, pode provocar sintomas de alergia ou de asma ou dificuldades respiratórias.

Skin Irrit. 2: H315 - Provoca irritação cutânea.

Skin Sens. 1: H317 - Pode provocar uma reacção alérgica cutânea.

STOT SE 3: H335 - Pode provocar irritação das vias respiratórias.

**Procedimento de classificação:**

Resp. Sens. 1: Método de cálculo

Skin Sens. 1: Método de cálculo

Acute Tox. 4: Método de cálculo

Eye Irrit. 2: Método de cálculo

**Conselhos relativos à formação:**

Recomenda-se formação mínima em matéria de prevenção de riscos laborais ao pessoal que vai a manipular este produto, com a finalidade de facilitar a compreensão e a interpretação desta ficha de dados de segurança, bem como da etiqueta / rótulo do produto.

**Principais fontes de literatura:**

<http://echa.europa.eu>

<http://eur-lex.europa.eu>

**Abreviaturas e acrónimos:**

(ADR) Acordo Europeu relativo ao Transporte Internacional de Mercadorias Perigosas por Estrada

(IMDG) Código Marítimo Internacional para o Transporte de Mercadorias Perigosas

(IATA) Associação Internacional de Transporte Aéreo

(ICAO) Organização de Aviação Civil Internacional

(DQO) Demanda Química de oxigénio

(DBO5) Demanda biológica de oxigénio aos 5 dias (BCF) Fator de bioconcentração

(DL50) Dose letal para 50 % de uma população de teste (dose letal mediana)

(CL50) Concentração letal para 50 % de uma população de teste

(EC50) Concentração efetiva para 50 % de uma população de teste

(Log POW) logaritmo coeficiente partição octanolágua

(Koc) coeficiente de partição do carbono orgânico

(CAS) Número CAS (Chemical Abstracts Service)

(CMR) Carcinogénico, mutagénico ou tóxico para a reprodução

(DNEL) Nível derivado de exposição sem efeito (Derived No Effect Level)

(CE) Número EINECS e ELINCS (ver também EINECS e ELINCS)

(PBT) Substância Persistente, Bioacumulável e Tóxica

(PNEC) Concentração Previsivelmente Sem Efeitos (Predicted No Effect Concentration)

(EPI) Equipamento de proteção individual

(STOT) Toxicidade para órgãosalvo específicos

(mPmB) Persistente, bioacumulável e tóxico ou muito persistente e muito bioacumulável

(UFI) identificador único de fórmula

(IARC) Centro Internacional de Investigação do Cancro

(C.O.V.) Compostos Orgânicos Voláteis

As informações constantes desta ficha são baseadas nos nossos melhores conhecimentos até à data de publicação, e são prestadas de boa fé. Devem no entanto ser entendidas como guia, não constituindo garantia, uma vez que as operações com o produto não estão sob nosso controlo, não assumindo esta empresa, qualquer responsabilidade por perdas ou danos daí resultantes. Estas informações não dispensam, em nenhum caso, ao utilizador do produto de cumprir e respeitar a legislação e regulamentos aplicáveis ao produto, à segurança, à higiene e à protecção da saúde do Homem e do meio ambiente, e de efectuar suficiente verificação e teste processual de eficácia. Os trabalhadores envolvidos e responsáveis pela área de segurança deverão ter acesso às informações constantes desta ficha de forma a garantir a segurança na armazenagem, manuseamento e transporte deste produto.

FIM DA FICHA DE DADOS DE SEGURANÇA
