# Supplementary material for: Shear Thickening Fluids in Cork Agglomerates: An Exploration of Advantages and Drawbacks
Source: Preprints.org preprint supplement (doi:10.20944/preprints202304.0004.v1), 2023-04-03
Supplement: Supplementary file 2 [file CG_y_0.xlsx]

## Sheet: data
Time - Force (Bridge) - Force	Amplitude - Force (Bridge) - Force	data
0	55.78	-55.78		-1
4e-05	12.61	-12.61
8e-05	20.67	-20.67
0.00012	30.73	-30.73
0.00016	37.87	-37.87
0.0002	20.44	-20.44
0.00024	49.83	-49.83
0.00028	929.9m	-0.9299
0.00032	45.29	-45.29
0.00036	43.99	-43.99
0.0004	34.02	-34.02
0.00044	31.45	-31.45
0.00048	35	-35
0.00052	22.66	-22.66
0.00056	27.89	-27.89
0.0006	56.42	-56.42
0.00064	10.06	-10.06
0.00068	33.1	-33.1
0.00072	24.74	-24.74
0.00076	40.52	-40.52
0.0008	47.37	-47.37
0.00084	29.51	-29.51
0.00088	24.8	-24.8
0.00092	22.23	-22.23
0.00096	41.59	-41.59
0.001	36.16	-36.16
0.00104	17.72	-17.72
0.00108	29.48	-29.48
0.00112	45.99	-45.99
0.00116	14.74	-14.74
0.0012	31.19	-31.19
0.00124	18.88	-18.88
0.00128	45.7	-45.7
0.00132	41.51	-41.51
0.00136	30.38	-30.38
0.0014	21.25	-21.25
0.00144	48.07	-48.07
0.00148	26.94	-26.94
0.00152	20.18	-20.18
0.00156	45.61	-45.61
0.0016	35.24	-35.24
0.00164	41.85	-41.85
0.00168	38.13	-38.13
0.00172	45.87	-45.87
0.00176	17.69	-17.69
0.0018	30.99	-30.99
0.00184	41.94	-41.94
0.00188	41.62	-41.62
0.00192	44.4	-44.4
0.00196	46.33	-46.33
0.002	54.57	-54.57
0.00204	41.33	-41.33
0.00208	25.15	-25.15
0.00212	42.03	-42.03
0.00216	46.85	-46.85
0.0022	40.12	-40.12
0.00224	31.71	-31.71
0.00228	20.55	-20.55
0.00232	35.73	-35.73
0.00236	39.51	-39.51
0.0024	48.39	-48.39
0.00244	36.74	-36.74
0.00248	32.55	-32.55
0.00252	31.04	-31.04
0.00256	30.84	-30.84
0.0026	24.4	-24.4
0.00264	27.37	-27.37
0.00268	36.65	-36.65
0.00272	25.41	-25.41
0.00276	39.02	-39.02
0.0028	27.52	-27.52
0.00284	25.12	-25.12
0.00288	43.24	-43.24
0.00292	44.34	-44.34
0.00296	53.44	-53.44
0.003	26.57	-26.57
0.00304	35.47	-35.47
0.00308	23.82	-23.82
0.00312	25.29	-25.29
0.00316	44.25	-44.25
0.0032	35.06	-35.06
0.00324	28.96	-28.96
0.00328	43.36	-43.36
0.00332	29.6	-29.6
0.00336	35.52	-35.52
0.0034	41.88	-41.88
0.00344	44.4	-44.4
0.00348	27.32	-27.32
0.00352	31.57	-31.57
0.00356	33.56	-33.56
0.0036	20.12	-20.12
0.00364	38.15	-38.15
0.00368	28.53	-28.53
0.00372	41.83	-41.83
0.00376	25.87	-25.87
0.0038	37.46	-37.46
0.00384	35.64	-35.64
0.00388	50.58	-50.58
0.00392	34.08	-34.08
0.00396	57.49	-57.49
0.004	38.73	-38.73
0.00404	45.5	-45.5
0.00408	28.79	-28.79
0.00412	39.48	-39.48
0.00416	37.89	-37.89
0.0042	24.31	-24.31
0.00424	24.11	-24.11
0.00428	25.38	-25.38
0.00432	23.1	-23.1
0.00436	25.35	-25.35
0.0044	43.01	-43.01
0.00444	29.6	-29.6
0.00448	43.73	-43.73
0.00452	26.65	-26.65
0.00456	41.39	-41.39
0.0046	29.25	-29.25
0.00464	8.849	-8.849
0.00468	38.36	-38.36
0.00472	26.1	-26.1
0.00476	43.56	-43.56
0.0048	35.87	-35.87
0.00484	27.52	-27.52
0.00488	19.34	-19.34
0.00492	36.13	-36.13
0.00496	38.93	-38.93
0.005	35.38	-35.38
0.00504	31.68	-31.68
0.00508	39.28	-39.28
0.00512	29.31	-29.31
0.00516	39.98	-39.98
0.0052	23.36	-23.36
0.00524	59.51	-59.51
0.00528	55.32	-55.32
0.00532	41.02	-41.02
0.00536	119.5	-119.5
0.0054	115.2	-115.2
0.00544	40.96	-40.96
0.00548	34.31	-34.31
0.00552	71.33	-71.33
0.00556	100.1	-100.1
0.0056	88.96	-88.96
0.00564	50.52	-50.52
0.00568	47.14	-47.14
0.00572	86.45	-86.45
0.00576	87.92	-87.92
0.0058	63.76	-63.76
0.00584	62.43	-62.43
0.00588	72.34	-72.34
0.00592	81.56	-81.56
0.00596	91.25	-91.25
0.006	41.45	-41.45
0.00604	61.51	-61.51
0.00608	79.45	-79.45
0.00612	86.71	-86.71
0.00616	64.51	-64.51
0.0062	35.55	-35.55
0.00624	58.96	-58.96
0.00628	58.56	-58.56
0.00632	81.65	-81.65
0.00636	42.29	-42.29
0.0064	59.45	-59.45
0.00644	68.07	-68.07
0.00648	69.02	-69.02
0.00652	42.52	-42.52
0.00656	67.14	-67.14
0.0066	105	-105
0.00664	86.74	-86.74
0.00668	57.81	-57.81
0.00672	61.36	-61.36
0.00676	56.07	-56.07
0.0068	73.44	-73.44
0.00684	72.43	-72.43
0.00688	77.37	-77.37
0.00692	53.99	-53.99
0.00696	52.37	-52.37
0.007	60.35	-60.35
0.00704	77.2	-77.2
0.00708	51.8	-51.8
0.00712	67.03	-67.03
0.00716	73.82	-73.82
0.0072	93.53	-93.53
0.00724	69.8	-69.8
0.00728	38.3	-38.3
0.00732	62.55	-62.55
0.00736	56.8	-56.8
0.0074	37.75	-37.75
0.00744	55.99	-55.99
0.00748	78.41	-78.41
0.00752	61.56	-61.56
0.00756	61.36	-61.36
0.0076	27.35	-27.35
0.00764	72.98	-72.98
0.00768	84.48	-84.48
0.00772	79.05	-79.05
0.00776	72.95	-72.95
0.0078	61.42	-61.42
0.00784	49.6	-49.6
0.00788	53.99	-53.99
0.00792	45.18	-45.18
0.00796	51.74	-51.74
0.008	93.07	-93.07
0.00804	87.46	-87.46
0.00808	85.73	-85.73
0.00812	87.03	-87.03
0.00816	50.93	-50.93
0.0082	31.02	-31.02
0.00824	65.64	-65.64
0.00828	35.18	-35.18
0.00832	70.23	-70.23
0.00836	55.26	-55.26
0.0084	52.29	-52.29
0.00844	80.26	-80.26
0.00848	52.92	-52.92
0.00852	51.33	-51.33
0.00856	53.79	-53.79
0.0086	56.51	-56.51
0.00864	55.03	-55.03
0.00868	56.77	-56.77
0.00872	44.98	-44.98
0.00876	34.89	-34.89
0.0088	18.42	-18.42
0.00884	32.29	-32.29
0.00888	46.16	-46.16
0.00892	56.85	-56.85
0.00896	72.69	-72.69
0.009	62.14	-62.14
0.00904	48.24	-48.24
0.00908	24.8	-24.8
0.00912	22.72	-22.72
0.00916	30.21	-30.21
0.0092	29.43	-29.43
0.00924	66.85	-66.85
0.00928	38.91	-38.91
0.00932	41.19	-41.19
0.00936	27.89	-27.89
0.0094	28.47	-28.47
0.00944	35.12	-35.12
0.00948	38.67	-38.67
0.00952	41.22	-41.22
0.00956	44.22	-44.22
0.0096	27.52	-27.52
0.00964	26.57	-26.57
0.00968	33.99	-33.99
0.00972	47.95	-47.95
0.00976	49.89	-49.89
0.0098	28.15	-28.15
0.00984	33.73	-33.73
0.00988	32.61	-32.61
0.00992	39.98	-39.98
0.00996	38.21	-38.21
0.01	17.2	-17.2
0.01004	42.17	-42.17
0.01008	31.94	-31.94
0.01012	31.59	-31.59
0.01016	46.36	-46.36
0.0102	24.83	-24.83
0.01024	33.47	-33.47
0.01028	41.59	-41.59
0.01032	26.54	-26.54
0.01036	23.07	-23.07
0.0104	19.02	-19.02
0.01044	33.47	-33.47
0.01048	43.36	-43.36
0.01052	40.81	-40.81
0.01056	24.95	-24.95
0.0106	42.89	-42.89
0.01064	20.81	-20.81
0.01068	21.36	-21.36
0.01072	28.1	-28.1
0.01076	33.96	-33.96
0.0108	4.6	-4.6
0.01084	20.9	-20.9
0.01088	38.91	-38.91
0.01092	27.61	-27.61
0.01096	18.3	-18.3
0.011	16.16	-16.16
0.01104	13.42	-13.42
0.01108	17.98	-17.98
0.01112	46.04	-46.04
0.01116	31.19	-31.19
0.0112	18.01	-18.01
0.01124	25.21	-25.21
0.01128	23.42	-23.42
0.01132	31.02	-31.02
0.01136	42.87	-42.87
0.0114	38.27	-38.27
0.01144	26.62	-26.62
0.01148	3.213	-3.213
0.01152	28.07	-28.07
0.01156	24.43	-24.43
0.0116	34.77	-34.77
0.01164	33.62	-33.62
0.01168	13.65	-13.65
0.01172	12.52	-12.52
0.01176	26.39	-26.39
0.0118	10.47	-10.47
0.01184	16.39	-16.39
0.01188	32.26	-32.26
0.01192	22.69	-22.69
0.01196	21.51	-21.51
0.012	13.3	-13.3
0.01204	21.36	-21.36
0.01208	16.59	-16.59
0.01212	22.17	-22.17
0.01216	11.1	-11.1
0.0122	38.01	-38.01
0.01224	17.23	-17.23
0.01228	23.99	-23.99
0.01232	8.531	-8.531
0.01236	16.31	-16.31
0.0124	24.57	-24.57
0.01244	41.83	-41.83
0.01248	18.47	-18.47
0.01252	20.67	-20.67
0.01256	34.92	-34.92
0.0126	20.58	-20.58
0.01264	15.21	-15.21
0.01268	20.55	-20.55
0.01272	323m	-0.323
0.01276	29.22	-29.22
0.0128	26.83	-26.83
0.01284	11.19	-11.19
0.01288	19.63	-19.63
0.01292	38.59	-38.59
0.01296	18.3	-18.3
0.013	18.56	-18.56
0.01304	19.28	-19.28
0.01308	10.15	-10.15
0.01312	19.72	-19.72
0.01316	20.41	-20.41
0.0132	20.58	-20.58
0.01324	21.45	-21.45
0.01328	20.47	-20.47
0.01332	15.15	-15.15
0.01336	22.61	-22.61
0.0134	29.66	-29.66
0.01344	41.88	-41.88
0.01348	35.52	-35.52
0.01352	35.99	-35.99
0.01356	14.22	-14.22
0.0136	33.91	-33.91
0.01364	33.94	-33.94
0.01368	39.98	-39.98
0.01372	11.1	-11.1
0.01376	26.94	-26.94
0.0138	33.04	-33.04
0.01384	23.18	-23.18
0.01388	21.1	-21.1
0.01392	9.369	-9.369
0.01396	27.75	-27.75
0.014	23.62	-23.62
0.01404	19.2	-19.2
0.01408	31.07	-31.07
0.01412	19.72	-19.72
0.01416	33.39	-33.39
0.0142	18.59	-18.59
0.01424	23.04	-23.04
0.01428	24.98	-24.98
0.01432	25.47	-25.47
0.01436	27.14	-27.14
0.0144	26.83	-26.83
0.01444	40.06	-40.06
0.01448	44.74	-44.74
0.01452	34.17	-34.17
0.01456	15.9	-15.9
0.0146	13.42	-13.42
0.01464	32.14	-32.14
0.01468	26.02	-26.02
0.01472	18.01	-18.01
0.01476	23.91	-23.91
0.0148	25.35	-25.35
0.01484	18.73	-18.73
0.01488	16.28	-16.28
0.01492	15.61	-15.61
0.01496	31.54	-31.54
0.015	32.66	-32.66
0.01504	14.2	-14.2
0.01508	28.24	-28.24
0.01512	28.96	-28.96
0.01516	28.59	-28.59
0.0152	23.85	-23.85
0.01524	24.89	-24.89
0.01528	35.84	-35.84
0.01532	5.323	-5.323
0.01536	-11.79	11.79
0.0154	7.982	-7.982
0.01544	18.15	-18.15
0.01548	2.028	-2.028
0.01552	-24.99	24.99
0.01556	-4.243	4.243
0.0156	31.39	-31.39
0.01564	-5.457	5.457
0.01568	-32.51	32.51
0.01572	-19.62	19.62
0.01576	-17.6	17.6
0.0158	41.13	-41.13
0.01584	14.34	-14.34
0.01588	-21.47	21.47
0.01592	-36.9	36.9
0.01596	7.779	-7.779
0.016	-3.087	3.087
0.01604	640.9m	-0.6409
0.01608	-17.19	17.19
0.01612	-16.53	16.53
0.01616	-544m	0.544
0.0162	9.196	-9.196
0.01624	5.554	-5.554
0.01628	-15.98	15.98
0.01632	-29.47	29.47
0.01636	14.08	-14.08
0.0164	-6.555	6.555
0.01644	3.762	-3.762
0.01648	-7.885	7.885
0.01652	-1.006	1.006
0.01656	44.19	-44.19
0.0166	-428.4m	0.4284
0.01664	554.2m	-0.5542
0.01668	-15.75	15.75
0.01672	7.404	-7.404
0.01676	24.28	-24.28
0.0168	13.36	-13.36
0.01684	17.72	-17.72
0.01688	-6.989	6.989
0.01692	30.61	-30.61
0.01696	18.82	-18.82
0.017	-5.082	5.082
0.01704	29.74	-29.74
0.01708	-15.4	15.4
0.01712	33.1	-33.1
0.01716	16.39	-16.39
0.0172	6.768	-6.768
0.01724	21.65	-21.65
0.01728	3.069	-3.069
0.01732	11.59	-11.59
0.01736	22.32	-22.32
0.0174	24.48	-24.48
0.01744	8.386	-8.386
0.01748	12.06	-12.06
0.01752	-8.983	8.983
0.01756	21.48	-21.48
0.0176	36.07	-36.07
0.01764	5.121	-5.121
0.01768	15.29	-15.29
0.01772	16.85	-16.85
0.01776	-11.47	11.47
0.0178	-5.573	5.573
0.01784	17.84	-17.84
0.01788	13.59	-13.59
0.01792	28.59	-28.59
0.01796	24.69	-24.69
0.018	22.14	-22.14
0.01804	-14.68	14.68
0.01808	149.6m	-0.1496
0.01812	23.13	-23.13
0.01816	36.33	-36.33
0.0182	6.277	-6.277
0.01824	33.3	-33.3
0.01828	12.23	-12.23
0.01832	18.76	-18.76
0.01836	8.733	-8.733
0.0184	14.92	-14.92
0.01844	42.63	-42.63
0.01848	9.398	-9.398
0.01852	3.531	-3.531
0.01856	-3.434	3.434
0.0186	32.66	-32.66
0.01864	35.29	-35.29
0.01868	27.43	-27.43
0.01872	24.22	-24.22
0.01876	22.09	-22.09
0.0188	51.82	-51.82
0.01884	18.04	-18.04
0.01888	35.81	-35.81
0.01892	23.88	-23.88
0.01896	40.29	-40.29
0.019	35.15	-35.15
0.01904	11.62	-11.62
0.01908	51.39	-51.39
0.01912	18.36	-18.36
0.01916	37	-37
0.0192	33.15	-33.15
0.01924	19.28	-19.28
0.01928	41.88	-41.88
0.01932	52.32	-52.32
0.01936	36.51	-36.51
0.0194	34.92	-34.92
0.01944	30.55	-30.55
0.01948	18.79	-18.79
0.01952	26.62	-26.62
0.01956	39.8	-39.8
0.0196	-4.272	4.272
0.01964	21.36	-21.36
0.01968	28.82	-28.82
0.01972	30.06	-30.06
0.01976	30.21	-30.21
0.0198	36.1	-36.1
0.01984	31.31	-31.31
0.01988	19.98	-19.98
0.01992	37.14	-37.14
0.01996	14.11	-14.11
0.02	32.92	-32.92
0.02004	16.48	-16.48
0.02008	18.65	-18.65
0.02012	18.07	-18.07
0.02016	26.8	-26.8
0.0202	13.04	-13.04
0.02024	46.94	-46.94
0.02028	10.35	-10.35
0.02032	14.57	-14.57
0.02036	24.28	-24.28
0.0204	48.24	-48.24
0.02044	16.83	-16.83
0.02048	21.1	-21.1
0.02052	58.67	-58.67
0.02056	39.77	-39.77
0.0206	33.18	-33.18
0.02064	13.44	-13.44
0.02068	57.26	-57.26
0.02072	22.69	-22.69
0.02076	31.42	-31.42
0.0208	19.11	-19.11
0.02084	27.98	-27.98
0.02088	40.96	-40.96
0.02092	30.58	-30.58
0.02096	32.81	-32.81
0.021	38.65	-38.65
0.02104	50.67	-50.67
0.02108	58.04	-58.04
0.02112	21.97	-21.97
0.02116	30.81	-30.81
0.0212	25.84	-25.84
0.02124	35.09	-35.09
0.02128	29.14	-29.14
0.02132	30.9	-30.9
0.02136	40.35	-40.35
0.0214	35	-35
0.02144	13.27	-13.27
0.02148	41.1	-41.1
0.02152	42.23	-42.23
0.02156	38.18	-38.18
0.0216	55.26	-55.26
0.02164	33.62	-33.62
0.02168	28.73	-28.73
0.02172	34.77	-34.77
0.02176	36.22	-36.22
0.0218	21.36	-21.36
0.02184	48.3	-48.3
0.02188	32.23	-32.23
0.02192	31.71	-31.71
0.02196	32.09	-32.09
0.022	24.98	-24.98
0.02204	46.65	-46.65
0.02208	32.78	-32.78
0.02212	20.73	-20.73
0.02216	34.54	-34.54
0.0222	39.98	-39.98
0.02224	32.06	-32.06
0.02228	30.18	-30.18
0.02232	20.41	-20.41
0.02236	18.7	-18.7
0.0224	27.23	-27.23
0.02244	32.52	-32.52
0.02248	10.73	-10.73
0.02252	29.89	-29.89
0.02256	41.36	-41.36
0.0226	27.14	-27.14
0.02264	35.06	-35.06
0.02268	23.82	-23.82
0.02272	25.78	-25.78
0.02276	24.43	-24.43
0.0228	16.33	-16.33
0.02284	34.51	-34.51
0.02288	29.34	-29.34
0.02292	53.62	-53.62
0.02296	33.18	-33.18
0.023	27.72	-27.72
0.02304	35.38	-35.38
0.02308	29.77	-29.77
0.02312	47.84	-47.84
0.02316	49.45	-49.45
0.0232	35.12	-35.12
0.02324	24.11	-24.11
0.02328	33.7	-33.7
0.02332	44.98	-44.98
0.02336	20.76	-20.76
0.0234	32.2	-32.2
0.02344	17.2	-17.2
0.02348	17.69	-17.69
0.02352	32.63	-32.63
0.02356	30.87	-30.87
0.0236	44.11	-44.11
0.02364	31.97	-31.97
0.02368	33.76	-33.76
0.02372	30.73	-30.73
0.02376	14.25	-14.25
0.0238	38.79	-38.79
0.02384	50.12	-50.12
0.02388	47.89	-47.89
0.02392	19.54	-19.54
0.02396	28.73	-28.73
0.024	40.52	-40.52
0.02404	18.44	-18.44
0.02408	41.28	-41.28
0.02412	29.05	-29.05
0.02416	24.98	-24.98
0.0242	38.62	-38.62
0.02424	29.46	-29.46
0.02428	35.35	-35.35
0.02432	35.64	-35.64
0.02436	32.32	-32.32
0.0244	33.7	-33.7
0.02444	27.37	-27.37
0.02448	19.46	-19.46
0.02452	27.37	-27.37
0.02456	31.83	-31.83
0.0246	34.8	-34.8
0.02464	38.53	-38.53
0.02468	32.95	-32.95
0.02472	33.39	-33.39
0.02476	26.36	-26.36
0.0248	38.7	-38.7
0.02484	37.32	-37.32
0.02488	31.02	-31.02
0.02492	34.17	-34.17
0.02496	32.43	-32.43
0.025	34.05	-34.05
0.02504	37.23	-37.23
0.02508	27.26	-27.26
0.02512	33.24	-33.24
0.02516	29.63	-29.63
0.0252	35.24	-35.24
0.02524	52.23	-52.23
0.02528	51.62	-51.62
0.02532	34.69	-34.69
0.02536	82.86	-82.86
0.0254	120.2	-120.2
0.02544	63.73	-63.73
0.02548	29.11	-29.11
0.02552	58.53	-58.53
0.02556	98.5	-98.5
0.0256	69.8	-69.8
0.02564	43.01	-43.01
0.02568	55.09	-55.09
0.02572	57.08	-57.08
0.02576	98.18	-98.18
0.0258	57.98	-57.98
0.02584	50.06	-50.06
0.02588	71.77	-71.77
0.02592	74.51	-74.51
0.02596	69.02	-69.02
0.026	49.54	-49.54
0.02604	77.32	-77.32
0.02608	90.87	-90.87
0.02612	110.9	-110.9
0.02616	33.65	-33.65
0.0262	48.47	-48.47
0.02624	62.06	-62.06
0.02628	84.22	-84.22
0.02632	74.37	-74.37
0.02636	28.99	-28.99
0.0264	60.12	-60.12
0.02644	72.69	-72.69
0.02648	72.2	-72.2
0.02652	82.29	-82.29
0.02656	75.06	-75.06
0.0266	59.31	-59.31
0.02664	56.85	-56.85
0.02668	64.4	-64.4
0.02672	95.75	-95.75
0.02676	70.67	-70.67
0.0268	31.22	-31.22
0.02684	64.51	-64.51
0.02688	75.35	-75.35
0.02692	60.84	-60.84
0.02696	82.86	-82.86
0.027	67.43	-67.43
0.02704	66.62	-66.62
0.02708	75.75	-75.75
0.02712	25.21	-25.21
0.02716	65.03	-65.03
0.0272	50.55	-50.55
0.02724	66.56	-66.56
0.02728	67	-67
0.02732	46.04	-46.04
0.02736	76.28	-76.28
0.0274	68.01	-68.01
0.02744	92.49	-92.49
0.02748	67.66	-67.66
0.02752	35	-35
0.02756	48.62	-48.62
0.0276	50.9	-50.9
0.02764	74.8	-74.8
0.02768	83.47	-83.47
0.02772	47.63	-47.63
0.02776	36.39	-36.39
0.0278	61.28	-61.28
0.02784	54.05	-54.05
0.02788	69.74	-69.74
0.02792	93.33	-93.33
0.02796	75.93	-75.93
0.028	78.21	-78.21
0.02804	45	-45
0.02808	65.9	-65.9
0.02812	42.32	-42.32
0.02816	59.95	-59.95
0.0282	50.76	-50.76
0.02824	72.37	-72.37
0.02828	50.15	-50.15
0.02832	45.73	-45.73
0.02836	66.74	-66.74
0.0284	65.73	-65.73
0.02844	63.39	-63.39
0.02848	67.58	-67.58
0.02852	46.07	-46.07
0.02856	47.98	-47.98
0.0286	70.47	-70.47
0.02864	74.05	-74.05
0.02868	48.07	-48.07
0.02872	38.59	-38.59
0.02876	44.02	-44.02
0.0288	39.57	-39.57
0.02884	39.34	-39.34
0.02888	42.26	-42.26
0.02892	50.06	-50.06
0.02896	18.82	-18.82
0.029	17.98	-17.98
0.02904	43.82	-43.82
0.02908	41.33	-41.33
0.02912	68.01	-68.01
0.02916	43.39	-43.39
0.0292	54.28	-54.28
0.02924	39.95	-39.95
0.02928	28.33	-28.33
0.02932	66.94	-66.94
0.02936	6.161	-6.161
0.0294	55.55	-55.55
0.02944	13.27	-13.27
0.02948	52.49	-52.49
0.02952	58.27	-58.27
0.02956	26.83	-26.83
0.0296	44.43	-44.43
0.02964	45.44	-45.44
0.02968	42.98	-42.98
0.02972	33.1	-33.1
0.02976	27	-27
0.0298	30.67	-30.67
0.02984	51.82	-51.82
0.02988	36.3	-36.3
0.02992	41.65	-41.65
0.02996	26.91	-26.91
0.03	53.01	-53.01
0.03004	55	-55
0.03008	40.61	-40.61
0.03012	21.85	-21.85
0.03016	32.49	-32.49
0.0302	16.07	-16.07
0.03024	46.42	-46.42
0.03028	10.12	-10.12
0.03032	40.87	-40.87
0.03036	27.92	-27.92
0.0304	41.19	-41.19
0.03044	39.83	-39.83
0.03048	24.83	-24.83
0.03052	46.54	-46.54
0.03056	23.79	-23.79
0.0306	39.54	-39.54
0.03064	39.51	-39.51
0.03068	41.36	-41.36
0.03072	37.14	-37.14
0.03076	4.08	-4.08
0.0308	47.06	-47.06
0.03084	44.83	-44.83
0.03088	17.26	-17.26
0.03092	23.62	-23.62
0.03096	30.67	-30.67
0.031	30.38	-30.38
0.03104	22.46	-22.46
0.03108	38.82	-38.82
0.03112	-1.064	1.064
0.03116	53.56	-53.56
0.0312	29.72	-29.72
0.03124	27.29	-27.29
0.03128	20.58	-20.58
0.03132	19.17	-19.17
0.03136	16.36	-16.36
0.0314	26.19	-26.19
0.03144	41.45	-41.45
0.03148	35.64	-35.64
0.03152	42.32	-42.32
0.03156	29.31	-29.31
0.0316	22.55	-22.55
0.03164	23.3	-23.3
0.03168	2.664	-2.664
0.03172	28.3	-28.3
0.03176	30	-30
0.0318	28.01	-28.01
0.03184	19.69	-19.69
0.03188	15.24	-15.24
0.03192	17.09	-17.09
0.03196	18.39	-18.39
0.032	29.8	-29.8
0.03204	31.74	-31.74
0.03208	17.87	-17.87
0.03212	20.99	-20.99
0.03216	47.46	-47.46
0.0322	23.96	-23.96
0.03224	24.31	-24.31
0.03228	29.74	-29.74
0.03232	20.06	-20.06
0.03236	13.76	-13.76
0.0324	29.05	-29.05
0.03244	38.67	-38.67
0.03248	26.16	-26.16
0.03252	11.91	-11.91
0.03256	18.99	-18.99
0.0326	23.94	-23.94
0.03264	18.68	-18.68
0.03268	19.51	-19.51
0.03272	7.173	-7.173
0.03276	8.531	-8.531
0.0328	29.46	-29.46
0.03284	25.5	-25.5
0.03288	29.86	-29.86
0.03292	25.93	-25.93
0.03296	40.96	-40.96
0.033	7.288	-7.288
0.03304	16.68	-16.68
0.03308	20.18	-20.18
0.03312	26.91	-26.91
0.03316	41.19	-41.19
0.0332	5.381	-5.381
0.03324	14.14	-14.14
0.03328	42.37	-42.37
0.03332	32.11	-32.11
0.03336	32.89	-32.89
0.0334	17.69	-17.69
0.03344	15	-15
0.03348	30.47	-30.47
0.03352	30.61	-30.61
0.03356	35.15	-35.15
0.0336	33.01	-33.01
0.03364	20.09	-20.09
0.03368	26.07	-26.07
0.03372	44.11	-44.11
0.03376	17.03	-17.03
0.0338	19.46	-19.46
0.03384	23.62	-23.62
0.03388	21.54	-21.54
0.03392	27.06	-27.06
0.03396	12.75	-12.75
0.034	25.84	-25.84
0.03404	35.03	-35.03
0.03408	30.55	-30.55
0.03412	26.77	-26.77
0.03416	14.46	-14.46
0.0342	36.25	-36.25
0.03424	18.42	-18.42
0.03428	29.54	-29.54
0.03432	27.87	-27.87
0.03436	18.33	-18.33
0.0344	35.47	-35.47
0.03444	23.33	-23.33
0.03448	17.81	-17.81
0.03452	44.08	-44.08
0.03456	31.85	-31.85
0.0346	22.63	-22.63
0.03464	34.6	-34.6
0.03468	20.76	-20.76
0.03472	32.52	-32.52
0.03476	21.57	-21.57
0.0348	22.11	-22.11
0.03484	38.01	-38.01
0.03488	38.44	-38.44
0.03492	30.41	-30.41
0.03496	15.99	-15.99
0.035	43.01	-43.01
0.03504	38.39	-38.39
0.03508	31.31	-31.31
0.03512	21.88	-21.88
0.03516	29.51	-29.51
0.0352	20.38	-20.38
0.03524	21.16	-21.16
0.03528	37.49	-37.49
0.03532	38.93	-38.93
0.03536	7.144	-7.144
0.0354	-16.27	16.27
0.03544	-23.52	23.52
0.03548	27.43	-27.43
0.03552	5.352	-5.352
0.03556	-22.42	22.42
0.0356	-22.39	22.39
0.03564	21.48	-21.48
0.03568	17.98	-17.98
0.03572	-3.752	3.752
0.03576	-24.04	24.04
0.0358	5.525	-5.525
0.03584	27.26	-27.26
0.03588	-9.417	9.417
0.03592	-16.21	16.21
0.03596	-17.62	17.62
0.036	51.39	-51.39
0.03604	-630.8m	0.6308
0.03608	-15.14	15.14
0.03612	-35.57	35.57
0.03616	26.13	-26.13
0.0362	-3.319	3.319
0.03624	4.976	-4.976
0.03628	18.3	-18.3
0.03632	25.64	-25.64
0.03636	-8.261	8.261
0.0364	4.543	-4.543
0.03644	23.39	-23.39
0.03648	5.901	-5.901
0.03652	12.66	-12.66
0.03656	1.855	-1.855
0.0366	18.5	-18.5
0.03664	-1.382	1.382
0.03668	27.66	-27.66
0.03672	29.25	-29.25
0.03676	351.9m	-0.3519
0.0368	12.14	-12.14
0.03684	-12.88	12.88
0.03688	3.011	-3.011
0.03692	-2.856	2.856
0.03696	6.97	-6.97
0.037	23.07	-23.07
0.03704	19.05	-19.05
0.03708	14.14	-14.14
0.03712	11.77	-11.77
0.03716	34.2	-34.2
0.0372	39.28	-39.28
0.03724	12.55	-12.55
0.03728	23.96	-23.96
0.03732	1.855	-1.855
0.03736	5.554	-5.554
0.0374	2.288	-2.288
0.03744	22.49	-22.49
0.03748	34.46	-34.46
0.03752	15.38	-15.38
0.03756	19.48	-19.48
0.0376	6.306	-6.306
0.03764	-10.6	10.6
0.03768	30.09	-30.09
0.03772	28.18	-28.18
0.03776	7.433	-7.433
0.0378	9.514	-9.514
0.03784	3.329	-3.329
0.03788	554.2m	-0.5542
0.03792	32.95	-32.95
0.03796	4.6	-4.6
0.038	17.61	-17.61
0.03804	-8.001	8.001
0.03808	-11.27	11.27
0.03812	8.04	-8.04
0.03816	24.34	-24.34
0.0382	41.65	-41.65
0.03824	-5.631	5.631
0.03828	25.7	-25.7
0.03832	2.577	-2.577
0.03836	39.28	-39.28
0.0384	10.9	-10.9
0.03844	6.421	-6.421
0.03848	17.84	-17.84
0.03852	28.73	-28.73
0.03856	3.82	-3.82
0.0386	814.3m	-0.8143
0.03864	12.52	-12.52
0.03868	23.88	-23.88
0.03872	24.6	-24.6
0.03876	28.56	-28.56
0.0388	36.57	-36.57
0.03884	13.76	-13.76
0.03888	34.66	-34.66
0.03892	11.83	-11.83
0.03896	11.25	-11.25
0.039	27.06	-27.06
0.03904	15	-15
0.03908	351.9m	-0.3519
0.03912	28.65	-28.65
0.03916	22.11	-22.11
0.0392	42.66	-42.66
0.03924	13.7	-13.7
0.03928	34.22	-34.22
0.03932	38.04	-38.04
0.03936	27.78	-27.78
0.0394	30.55	-30.55
0.03944	22.55	-22.55
0.03948	21.42	-21.42
0.03952	36.22	-36.22
0.03956	1.624	-1.624
0.0396	26.39	-26.39
0.03964	14.57	-14.57
0.03968	54.17	-54.17
0.03972	35.29	-35.29
0.03976	24.17	-24.17
0.0398	18.53	-18.53
0.03984	25.93	-25.93
0.03988	50	-50
0.03992	13.7	-13.7
0.03996	35.7	-35.7
0.04	32.32	-32.32
0.04004	26.68	-26.68
0.04008	8.531	-8.531
0.04012	42.89	-42.89
0.04016	33.82	-33.82
0.0402	46.33	-46.33
0.04024	26.65	-26.65
0.04028	48.3	-48.3
0.04032	39.77	-39.77
0.04036	33.27	-33.27
0.0404	31.33	-31.33
0.04044	21.19	-21.19
0.04048	43.41	-43.41
0.04052	35.32	-35.32
0.04056	45.52	-45.52
0.0406	5.121	-5.121
0.04064	24.83	-24.83
0.04068	39.51	-39.51
0.04072	34.74	-34.74
0.04076	27.98	-27.98
0.0408	34.72	-34.72
0.04084	23.99	-23.99
0.04088	26.57	-26.57
0.04092	35.67	-35.67
0.04096	38.15	-38.15
0.041	20.52	-20.52
0.04104	29.48	-29.48
0.04108	43.27	-43.27
0.04112	41.28	-41.28
0.04116	36.94	-36.94
0.0412	15.52	-15.52
0.04124	30.87	-30.87
0.04128	45.32	-45.32
0.04132	37.35	-37.35
0.04136	32.72	-32.72
0.0414	31.16	-31.16
0.04144	25.41	-25.41
0.04148	28.04	-28.04
0.04152	39.8	-39.8
0.04156	39.17	-39.17
0.0416	33.3	-33.3
0.04164	16.22	-16.22
0.04168	23.73	-23.73
0.04172	33.56	-33.56
0.04176	52.61	-52.61
0.0418	40.26	-40.26
0.04184	35.67	-35.67
0.04188	34.66	-34.66
0.04192	46.88	-46.88
0.04196	27.4	-27.4
0.042	26.74	-26.74
0.04204	43.07	-43.07
0.04208	26.94	-26.94
0.04212	22.66	-22.66
0.04216	42.61	-42.61
0.0422	41.59	-41.59
0.04224	27.29	-27.29
0.04228	11.19	-11.19
0.04232	46.1	-46.1
0.04236	14.86	-14.86
0.0424	35.78	-35.78
0.04244	31.91	-31.91
0.04248	38.27	-38.27
0.04252	32.95	-32.95
0.04256	30.18	-30.18
0.0426	35.06	-35.06
0.04264	29.37	-29.37
0.04268	45.99	-45.99
0.04272	41.33	-41.33
0.04276	35.52	-35.52
0.0428	36.19	-36.19
0.04284	21.13	-21.13
0.04288	29.25	-29.25
0.04292	38.96	-38.96
0.04296	22.63	-22.63
0.043	49.66	-49.66
0.04304	49.74	-49.74
0.04308	39.4	-39.4
0.04312	31.65	-31.65
0.04316	27.2	-27.2
0.0432	19.74	-19.74
0.04324	34.28	-34.28
0.04328	39.08	-39.08
0.04332	34.28	-34.28
0.04336	26.68	-26.68
0.0434	21.02	-21.02
0.04344	27.55	-27.55
0.04348	26.54	-26.54
0.04352	40.35	-40.35
0.04356	44.14	-44.14
0.0436	42.69	-42.69
0.04364	27.26	-27.26
0.04368	23.73	-23.73
0.04372	42.43	-42.43
0.04376	46.74	-46.74
0.0438	26.74	-26.74
0.04384	32.14	-32.14
0.04388	44.95	-44.95
0.04392	42	-42
0.04396	40.64	-40.64
0.044	38.01	-38.01
0.04404	35.76	-35.76
0.04408	47.61	-47.61
0.04412	24.28	-24.28
0.04416	29.63	-29.63
0.0442	46.74	-46.74
0.04424	24.83	-24.83
0.04428	30.18	-30.18
0.04432	31.07	-31.07
0.04436	31.51	-31.51
0.0444	31.59	-31.59
0.04444	40.5	-40.5
0.04448	36.22	-36.22
0.04452	30.9	-30.9
0.04456	36.54	-36.54
0.0446	37.29	-37.29
0.04464	35.47	-35.47
0.04468	35.5	-35.5
0.04472	21.19	-21.19
0.04476	23.36	-23.36
0.0448	38.99	-38.99
0.04484	22.46	-22.46
0.04488	34.74	-34.74
0.04492	36.74	-36.74
0.04496	36.57	-36.57
0.045	34.02	-34.02
0.04504	20.67	-20.67
0.04508	33.3	-33.3
0.04512	29.22	-29.22
0.04516	45.24	-45.24
0.0452	40.44	-40.44
0.04524	33.1	-33.1
0.04528	24.37	-24.37
0.04532	75.09	-75.09
0.04536	129	-129
0.0454	91.56	-91.56
0.04544	44.74	-44.74
0.04548	54.86	-54.86
0.04552	81.51	-81.51
0.04556	64.22	-64.22
0.0456	53.82	-53.82
0.04564	55.47	-55.47
0.04568	85.35	-85.35
0.04572	82.4	-82.4
0.04576	79.92	-79.92
0.0458	40.64	-40.64
0.04584	64.14	-64.14
0.04588	80.32	-80.32
0.04592	124	-124
0.04596	64.86	-64.86
0.046	46.77	-46.77
0.04604	60.29	-60.29
0.04608	65.29	-65.29
0.04612	83.85	-83.85
0.04616	53.73	-53.73
0.0462	67.43	-67.43
0.04624	83.07	-83.07
0.04628	75.58	-75.58
0.04632	56.56	-56.56
0.04636	51.04	-51.04
0.0464	73.79	-73.79
0.04644	51.02	-51.02
0.04648	104.4	-104.4
0.04652	75.44	-75.44
0.04656	60.24	-60.24
0.0466	38.5	-38.5
0.04664	79.08	-79.08
0.04668	68.59	-68.59
0.04672	93.18	-93.18
0.04676	68.33	-68.33
0.0468	40.73	-40.73
0.04684	64.57	-64.57
0.04688	44.11	-44.11
0.04692	82.58	-82.58
0.04696	89.89	-89.89
0.047	56.51	-56.51
0.04704	49.54	-49.54
0.04708	75.49	-75.49
0.04712	80.18	-80.18
0.04716	81.3	-81.3
0.0472	48.33	-48.33
0.04724	38.76	-38.76
0.04728	37.23	-37.23
0.04732	55.78	-55.78
0.04736	73.56	-73.56
0.0474	91.71	-91.71
0.04744	68.85	-68.85
0.04748	72.11	-72.11
0.04752	49.69	-49.69
0.04756	83.96	-83.96
0.0476	67.06	-67.06
0.04764	61.85	-61.85
0.04768	64.69	-64.69
0.04772	47.09	-47.09
0.04776	64.4	-64.4
0.0478	46.45	-46.45
0.04784	106.8	-106.8
0.04788	63.5	-63.5
0.04792	29.34	-29.34
0.04796	53.59	-53.59
0.048	52.61	-52.61
0.04804	67.08	-67.08
0.04808	64.37	-64.37
0.04812	75.35	-75.35
0.04816	60.06	-60.06
0.0482	32.89	-32.89
0.04824	64.57	-64.57
0.04828	67	-67
0.04832	45.47	-45.47
0.04836	55.61	-55.61
0.0484	45.73	-45.73
0.04844	26.19	-26.19
0.04848	37.95	-37.95
0.04852	51.22	-51.22
0.04856	56.62	-56.62
0.0486	62.06	-62.06
0.04864	48.59	-48.59
0.04868	49.66	-49.66
0.04872	43.04	-43.04
0.04876	48.3	-48.3
0.0488	53.53	-53.53
0.04884	46.8	-46.8
0.04888	27.95	-27.95
0.04892	23.73	-23.73
0.04896	35.58	-35.58
0.049	33.27	-33.27
0.04904	51.56	-51.56
0.04908	55.32	-55.32
0.04912	29.77	-29.77
0.04916	38.53	-38.53
0.0492	47.92	-47.92
0.04924	65.5	-65.5
0.04928	79.17	-79.17
0.04932	25.35	-25.35
0.04936	49.66	-49.66
0.0494	37.84	-37.84
0.04944	39.74	-39.74
0.04948	51.74	-51.74
0.04952	34.48	-34.48
0.04956	42.55	-42.55
0.0496	33.3	-33.3
0.04964	25	-25
0.04968	22.69	-22.69
0.04972	46.28	-46.28
0.04976	47.55	-47.55
0.0498	38.44	-38.44
0.04984	40.41	-40.41
0.04988	29.22	-29.22
0.04992	43.01	-43.01
0.04996	24.74	-24.74
0.05	33.15	-33.15
0.05004	28.15	-28.15
0.05008	31.1	-31.1
0.05012	49.69	-49.69
0.05016	27.14	-27.14
0.0502	33.7	-33.7
0.05024	38.59	-38.59
0.05028	13.79	-13.79
0.05032	40.47	-40.47
0.05036	43.99	-43.99
0.0504	28.91	-28.91
0.05044	39.17	-39.17
0.05048	21.05	-21.05
0.05052	45.7	-45.7
0.05056	14.54	-14.54
0.0506	24.63	-24.63
0.05064	31.02	-31.02
0.05068	40.03	-40.03
0.05072	31.94	-31.94
0.05076	29.34	-29.34
0.0508	33.41	-33.41
0.05084	44.8	-44.8
0.05088	42.92	-42.92
0.05092	41.45	-41.45
0.05096	9.803	-9.803
0.051	13.65	-13.65
0.05104	23.01	-23.01
0.05108	1.45	-1.45
0.05112	47.23	-47.23
0.05116	22.78	-22.78
0.0512	24.95	-24.95
0.05124	22.92	-22.92
0.05128	25.35	-25.35
0.05132	33.04	-33.04
0.05136	1.797	-1.797
0.0514	44.72	-44.72
0.05144	44.02	-44.02
0.05148	30.44	-30.44
0.05152	16.68	-16.68
0.05156	24.74	-24.74
0.0516	35.12	-35.12
0.05164	28.62	-28.62
0.05168	49.48	-49.48
0.05172	27.37	-27.37
0.05176	22.58	-22.58
0.0518	13.94	-13.94
0.05184	45.12	-45.12
0.05188	45	-45
0.05192	23.04	-23.04
0.05196	25.41	-25.41
0.052	19.34	-19.34
0.05204	13.5	-13.5
0.05208	29.37	-29.37
0.05212	34.2	-34.2
0.05216	25.32	-25.32
0.0522	34.86	-34.86
0.05224	12.58	-12.58
0.05228	9.514	-9.514
0.05232	20.93	-20.93
0.05236	34.08	-34.08
0.0524	21.57	-21.57
0.05244	19.05	-19.05
0.05248	15.99	-15.99
0.05252	8.733	-8.733
0.05256	30.03	-30.03
0.0526	18.73	-18.73
0.05264	31.97	-31.97
0.05268	5.121	-5.121
0.05272	11.59	-11.59
0.05276	13.5	-13.5
0.0528	24.92	-24.92
0.05284	35.41	-35.41
0.05288	32.89	-32.89
0.05292	14.54	-14.54
0.05296	4.109	-4.109
0.053	20.15	-20.15
0.05304	21.19	-21.19
0.05308	23.56	-23.56
0.05312	18.39	-18.39
0.05316	20.21	-20.21
0.0532	22.63	-22.63
0.05324	24.63	-24.63
0.05328	17.52	-17.52
0.05332	15.55	-15.55
0.05336	6.566	-6.566
0.0534	25.87	-25.87
0.05344	20.67	-20.67
0.05348	8.791	-8.791
0.05352	29.54	-29.54
0.05356	9.398	-9.398
0.0536	25.38	-25.38
0.05364	19.69	-19.69
0.05368	17.14	-17.14
0.05372	43.62	-43.62
0.05376	27.98	-27.98
0.0538	11.48	-11.48
0.05384	30.26	-30.26
0.05388	34.37	-34.37
0.05392	29.51	-29.51
0.05396	25.29	-25.29
0.054	38.53	-38.53
0.05404	10.09	-10.09
0.05408	28.68	-28.68
0.05412	21.39	-21.39
0.05416	17.49	-17.49
0.0542	24.77	-24.77
0.05424	19.66	-19.66
0.05428	27.46	-27.46
0.05432	23.73	-23.73
0.05436	29.4	-29.4
0.0544	3.82	-3.82
0.05444	37.52	-37.52
0.05448	44.69	-44.69
0.05452	24.25	-24.25
0.05456	16.42	-16.42
0.0546	12	-12
0.05464	26.16	-26.16
0.05468	19.83	-19.83
0.05472	27.49	-27.49
0.05476	10.47	-10.47
0.0548	37.66	-37.66
0.05484	22.23	-22.23
0.05488	37.84	-37.84
0.05492	48.47	-48.47
0.05496	26.48	-26.48
0.055	27.29	-27.29
0.05504	20.47	-20.47
0.05508	18.21	-18.21
0.05512	34.95	-34.95
0.05516	28.79	-28.79
0.0552	30.78	-30.78
0.05524	13.47	-13.47
0.05528	21.39	-21.39
0.05532	50.29	-50.29
0.05536	20.55	-20.55
0.0554	7.837	-7.837
0.05544	-25.46	25.46
0.05548	-717.5m	0.7175
0.05552	50.58	-50.58
0.05556	-3.319	3.319
0.0556	-50.49	50.49
0.05564	-42.45	42.45
0.05568	6.508	-6.508
0.05572	30.26	-30.26
0.05576	-8.607	8.607
0.0558	-6.671	6.671
0.05584	4.658	-4.658
0.05588	-18	18
0.05592	-15.23	15.23
0.05596	-3.781	3.781
0.056	-1.151	1.151
0.05604	-39.42	39.42
0.05608	18.53	-18.53
0.05612	5.901	-5.901
0.05616	-9.33	9.33
0.0562	-4.128	4.128
0.05624	12.84	-12.84
0.05628	33.82	-33.82
0.05632	-13.87	13.87
0.05636	-12.31	12.31
0.0564	34.2	-34.2
0.05644	8.358	-8.358
0.05648	12.32	-12.32
0.05652	19.77	-19.77
0.05656	8.126	-8.126
0.0566	26.31	-26.31
0.05664	9.282	-9.282
0.05668	32.4	-32.4
0.05672	9.051	-9.051
0.05676	29.92	-29.92
0.0568	14.6	-14.6
0.05684	3.791	-3.791
0.05688	-139.4m	0.1394
0.05692	16.71	-16.71
0.05696	19.28	-19.28
0.057	16.07	-16.07
0.05704	16.85	-16.85
0.05708	-1.295	1.295
0.05712	-8.579	8.579
0.05716	10.53	-10.53
0.0572	6.392	-6.392
0.05724	15.99	-15.99
0.05728	28.04	-28.04
0.05732	15.96	-15.96
0.05736	17.17	-17.17
0.0574	8.242	-8.242
0.05744	18.42	-18.42
0.05748	29.43	-29.43
0.05752	-3.579	3.579
0.05756	8.936	-8.936
0.0576	698.7m	-0.6987
0.05764	17.66	-17.66
0.05768	16.54	-16.54
0.05772	9.253	-9.253
0.05776	26.25	-26.25
0.0578	8.415	-8.415
0.05784	15.44	-15.44
0.05788	-3.694	3.694
0.05792	-457.3m	0.4573
0.05796	10.03	-10.03
0.058	16.77	-16.77
0.05804	4.022	-4.022
0.05808	-746.4m	0.7464
0.05812	5.467	-5.467
0.05816	20.5	-20.5
0.0582	18.3	-18.3
0.05824	13.94	-13.94
0.05828	31.77	-31.77
0.05832	26.28	-26.28
0.05836	14.86	-14.86
0.0584	2.202	-2.202
0.05844	16.07	-16.07
0.05848	17.52	-17.52
0.05852	22	-22
0.05856	27	-27
0.0586	14.57	-14.57
0.05864	14.02	-14.02
0.05868	3.589	-3.589
0.05872	36.07	-36.07
0.05876	26.74	-26.74
0.0588	13.85	-13.85
0.05884	23.82	-23.82
0.05888	51.88	-51.88
0.05892	6.71	-6.71
0.05896	39.72	-39.72
0.059	26.71	-26.71
0.05904	47.17	-47.17
0.05908	34.34	-34.34
0.05912	41.54	-41.54
0.05916	23.88	-23.88
0.0592	8.358	-8.358
0.05924	5.381	-5.381
0.05928	26.28	-26.28
0.05932	36.88	-36.88
0.05936	12.95	-12.95
0.0594	36.91	-36.91
0.05944	3.907	-3.907
0.05948	35.9	-35.9
0.05952	34.57	-34.57
0.05956	20.64	-20.64
0.0596	25.06	-25.06
0.05964	29.31	-29.31
0.05968	25.12	-25.12
0.05972	38.62	-38.62
0.05976	18.18	-18.18
0.0598	35.61	-35.61
0.05984	44.83	-44.83
0.05988	23.5	-23.5
0.05992	24.14	-24.14
0.05996	28.15	-28.15
0.06	32.95	-32.95
0.06004	35.44	-35.44
0.06008	28.24	-28.24
0.06012	45.7	-45.7
0.06016	29.46	-29.46
0.0602	58.07	-58.07
0.06024	13.56	-13.56
0.06028	20	-20
0.06032	23.76	-23.76
0.06036	27.72	-27.72
0.0604	49.31	-49.31
0.06044	48.27	-48.27
0.06048	16.51	-16.51
0.06052	19.54	-19.54
0.06056	30.09	-30.09
0.0606	23.1	-23.1
0.06064	39.43	-39.43
0.06068	26.59	-26.59
0.06072	31.33	-31.33
0.06076	38.33	-38.33
0.0608	26.77	-26.77
0.06084	28.1	-28.1
0.06088	28.88	-28.88
0.06092	43.07	-43.07
0.06096	26.74	-26.74
0.061	42.58	-42.58
0.06104	24.31	-24.31
0.06108	18.99	-18.99
0.06112	39.31	-39.31
0.06116	30.15	-30.15
0.0612	34.4	-34.4
0.06124	30.58	-30.58
0.06128	40.5	-40.5
0.06132	34.92	-34.92
0.06136	10.15	-10.15
0.0614	19.51	-19.51
0.06144	34.02	-34.02
0.06148	43.99	-43.99
0.06152	26.54	-26.54
0.06156	36.39	-36.39
0.0616	35.76	-35.76
0.06164	29.92	-29.92
0.06168	34.69	-34.69
0.06172	36.28	-36.28
0.06176	21.57	-21.57
0.0618	21.25	-21.25
0.06184	40.12	-40.12
0.06188	40.58	-40.58
0.06192	11.48	-11.48
0.06196	39.31	-39.31
0.062	27.46	-27.46
0.06204	28.27	-28.27
0.06208	22.09	-22.09
0.06212	27.81	-27.81
0.06216	40.61	-40.61
0.0622	34.51	-34.51
0.06224	40.44	-40.44
0.06228	37.2	-37.2
0.06232	43.27	-43.27
0.06236	27.4	-27.4
0.0624	51.19	-51.19
0.06244	26.97	-26.97
0.06248	36.88	-36.88
0.06252	25.84	-25.84
0.06256	43.79	-43.79
0.0626	43.82	-43.82
0.06264	47.52	-47.52
0.06268	29.89	-29.89
0.06272	11.62	-11.62
0.06276	21.42	-21.42
0.0628	35.29	-35.29
0.06284	13.01	-13.01
0.06288	31.71	-31.71
0.06292	39.6	-39.6
0.06296	29.31	-29.31
0.063	30.93	-30.93
0.06304	14.11	-14.11
0.06308	30.44	-30.44
0.06312	42.26	-42.26
0.06316	31.25	-31.25
0.0632	25.61	-25.61
0.06324	29.31	-29.31
0.06328	33.53	-33.53
0.06332	44.95	-44.95
0.06336	30.58	-30.58
0.0634	36.3	-36.3
0.06344	34.98	-34.98
0.06348	37.55	-37.55
0.06352	38.47	-38.47
0.06356	24.8	-24.8
0.0636	34.95	-34.95
0.06364	43.99	-43.99
0.06368	24.86	-24.86
0.06372	26.1	-26.1
0.06376	39.25	-39.25
0.0638	40.06	-40.06
0.06384	32.89	-32.89
0.06388	19.17	-19.17
0.06392	40.78	-40.78
0.06396	32.03	-32.03
0.064	20.81	-20.81
0.06404	46.85	-46.85
0.06408	41.88	-41.88
0.06412	35.73	-35.73
0.06416	34.54	-34.54
0.0642	33.88	-33.88
0.06424	27.58	-27.58
0.06428	42.4	-42.4
0.06432	41.02	-41.02
0.06436	41.3	-41.3
0.0644	36.19	-36.19
0.06444	33.85	-33.85
0.06448	35.06	-35.06
0.06452	33.53	-33.53
0.06456	28.15	-28.15
0.0646	23.1	-23.1
0.06464	48.5	-48.5
0.06468	25.15	-25.15
0.06472	26.59	-26.59
0.06476	32.87	-32.87
0.0648	49.19	-49.19
0.06484	25.15	-25.15
0.06488	26.71	-26.71
0.06492	26.16	-26.16
0.06496	39.63	-39.63
0.065	23.18	-23.18
0.06504	29.74	-29.74
0.06508	38.47	-38.47
0.06512	33.5	-33.5
0.06516	19.2	-19.2
0.0652	35.09	-35.09
0.06524	36.07	-36.07
0.06528	34.77	-34.77
0.06532	107.3	-107.3
0.06536	58.07	-58.07
0.0654	56.02	-56.02
0.06544	84.86	-84.86
0.06548	99.11	-99.11
0.06552	80.52	-80.52
0.06556	23.36	-23.36
0.0656	95.06	-95.06
0.06564	74.89	-74.89
0.06568	43.59	-43.59
0.06572	49.57	-49.57
0.06576	71.62	-71.62
0.0658	90.52	-90.52
0.06584	104.2	-104.2
0.06588	51.02	-51.02
0.06592	30.26	-30.26
0.06596	63.33	-63.33
0.066	88.59	-88.59
0.06604	114.8	-114.8
0.06608	60.55	-60.55
0.06612	57.11	-57.11
0.06616	82.89	-82.89
0.0662	69.22	-69.22
0.06624	86.77	-86.77
0.06628	44.77	-44.77
0.06632	56.88	-56.88
0.06636	62.72	-62.72
0.0664	86.13	-86.13
0.06644	63.76	-63.76
0.06648	62.92	-62.92
0.06652	87.52	-87.52
0.06656	76.74	-76.74
0.0666	52.66	-52.66
0.06664	43.21	-43.21
0.06668	77.29	-77.29
0.06672	70.64	-70.64
0.06676	70.96	-70.96
0.0668	32.98	-32.98
0.06684	76.62	-76.62
0.06688	49.37	-49.37
0.06692	82.86	-82.86
0.06696	54.08	-54.08
0.067	44.54	-44.54
0.06704	76.82	-76.82
0.06708	66.04	-66.04
0.06712	91.16	-91.16
0.06716	61.02	-61.02
0.0672	75.93	-75.93
0.06724	25.03	-25.03
0.06728	57.2	-57.2
0.06732	60.35	-60.35
0.06736	83.99	-83.99
0.0674	77.4	-77.4
0.06744	55.06	-55.06
0.06748	49.45	-49.45
0.06752	40.78	-40.78
0.06756	67.63	-67.63
0.0676	88.7	-88.7
0.06764	72.75	-72.75
0.06768	68.73	-68.73
0.06772	26.07	-26.07
0.06776	35.41	-35.41
0.0678	41.97	-41.97
0.06784	58.44	-58.44
0.06788	68.59	-68.59
0.06792	62.92	-62.92
0.06796	73.93	-73.93
0.068	32.11	-32.11
0.06804	25.03	-25.03
0.06808	38.39	-38.39
0.06812	56.48	-56.48
0.06816	90.87	-90.87
0.0682	92.29	-92.29
0.06824	54.98	-54.98
0.06828	52.75	-52.75
0.06832	68.41	-68.41
0.06836	52.29	-52.29
0.0684	50.06	-50.06
0.06844	28.1	-28.1
0.06848	64.57	-64.57
0.06852	33.96	-33.96
0.06856	30.76	-30.76
0.0686	70.84	-70.84
0.06864	62.29	-62.29
0.06868	36.94	-36.94
0.06872	46.13	-46.13
0.06876	36.57	-36.57
0.0688	35.44	-35.44
0.06884	44.8	-44.8
0.06888	35.99	-35.99
0.06892	55.18	-55.18
0.06896	20.9	-20.9
0.069	17.32	-17.32
0.06904	38.21	-38.21
0.06908	41.65	-41.65
0.06912	73.07	-73.07
0.06916	41.04	-41.04
0.0692	50.99	-50.99
0.06924	42.75	-42.75
0.06928	47.69	-47.69
0.06932	80.81	-80.81
0.06936	25.96	-25.96
0.0694	35.87	-35.87
0.06944	43.1	-43.1
0.06948	20.15	-20.15
0.06952	40.78	-40.78
0.06956	45.26	-45.26
0.0696	54.95	-54.95
0.06964	25.9	-25.9
0.06968	40.12	-40.12
0.06972	40.26	-40.26
0.06976	25.12	-25.12
0.0698	40.18	-40.18
0.06984	35.38	-35.38
0.06988	44.25	-44.25
0.06992	33.99	-33.99
0.06996	32	-32
0.07	24.98	-24.98
0.07004	23.13	-23.13
0.07008	43.56	-43.56
0.07012	33.41	-33.41
0.07016	30.44	-30.44
0.0702	43.27	-43.27
0.07024	32.98	-32.98
0.07028	37.09	-37.09
0.07032	36.19	-36.19
0.07036	25.35	-25.35
0.0704	39.63	-39.63
0.07044	24.54	-24.54
0.07048	28.85	-28.85
0.07052	19.66	-19.66
0.07056	37.2	-37.2
0.0706	38.33	-38.33
0.07064	43.1	-43.1
0.07068	25.03	-25.03
0.07072	14.8	-14.8
0.07076	39.31	-39.31
0.0708	22.52	-22.52
0.07084	40.58	-40.58
0.07088	16.16	-16.16
0.07092	41.56	-41.56
0.07096	22.87	-22.87
0.071	45.29	-45.29
0.07104	30.52	-30.52
0.07108	24.98	-24.98
0.07112	27.26	-27.26
0.07116	26.65	-26.65
0.0712	40.26	-40.26
0.07124	46.65	-46.65
0.07128	29.83	-29.83
0.07132	17.29	-17.29
0.07136	23.36	-23.36
0.0714	23.24	-23.24
0.07144	26.77	-26.77
0.07148	21.51	-21.51
0.07152	22.52	-22.52
0.07156	22.49	-22.49
0.0716	20.96	-20.96
0.07164	8.155	-8.155
0.07168	21.13	-21.13
0.07172	33.62	-33.62
0.07176	40.5	-40.5
0.0718	21.22	-21.22
0.07184	20.55	-20.55
0.07188	13.04	-13.04
0.07192	24.74	-24.74
0.07196	39.11	-39.11
0.072	29.86	-29.86
0.07204	23.42	-23.42
0.07208	27.14	-27.14
0.07212	36.36	-36.36
0.07216	21.28	-21.28
0.0722	4.832	-4.832
0.07224	16.59	-16.59
0.07228	9.716	-9.716
0.07232	38.36	-38.36
0.07236	20.38	-20.38
0.0724	13.91	-13.91
0.07244	4.109	-4.109
0.07248	26.68	-26.68
0.07252	35.55	-35.55
0.07256	38.53	-38.53
0.0726	28.47	-28.47
0.07264	13.7	-13.7
0.07268	28.91	-28.91
0.07272	9.514	-9.514
0.07276	24.11	-24.11
0.0728	30.58	-30.58
0.07284	23.62	-23.62
0.07288	15.15	-15.15
0.07292	612m	-0.612
0.07296	29.57	-29.57
0.073	21.19	-21.19
0.07304	17.84	-17.84
0.07308	22.81	-22.81
0.07312	5.467	-5.467
0.07316	29.4	-29.4
0.0732	21.51	-21.51
0.07324	27.81	-27.81
0.07328	24.69	-24.69
0.07332	18.27	-18.27
0.07336	15.87	-15.87
0.0734	32.2	-32.2
0.07344	20.9	-20.9
0.07348	45.87	-45.87
0.07352	20.73	-20.73
0.07356	13.13	-13.13
0.0736	10.53	-10.53
0.07364	23.1	-23.1
0.07368	33.59	-33.59
0.07372	32.37	-32.37
0.07376	34.51	-34.51
0.0738	10	-10
0.07384	26.19	-26.19
0.07388	30.47	-30.47
0.07392	24.22	-24.22
0.07396	15.26	-15.26
0.074	17.32	-17.32
0.07404	21.57	-21.57
0.07408	21.8	-21.8
0.07412	18.33	-18.33
0.07416	21.36	-21.36
0.0742	40.44	-40.44
0.07424	43.33	-43.33
0.07428	27.11	-27.11
0.07432	29.22	-29.22
0.07436	26.33	-26.33
0.0744	16.45	-16.45
0.07444	30	-30
0.07448	22.11	-22.11
0.07452	40.5	-40.5
0.07456	12.63	-12.63
0.0746	46.19	-46.19
0.07464	32.4	-32.4
0.07468	31.39	-31.39
0.07472	23.53	-23.53
0.07476	35.76	-35.76
0.0748	16.57	-16.57
0.07484	27.81	-27.81
0.07488	24.51	-24.51
0.07492	12	-12
0.07496	27.95	-27.95
0.075	35.78	-35.78
0.07504	19.83	-19.83
0.07508	31.59	-31.59
0.07512	30.5	-30.5
0.07516	23.01	-23.01
0.0752	28.76	-28.76
0.07524	25.96	-25.96
0.07528	39.25	-39.25
0.07532	-4.764	4.764
0.07536	-12.97	12.97
0.0754	2.664	-2.664
0.07544	20	-20
0.07548	25.15	-25.15
0.07552	-7.018	7.018
0.07556	-41.76	41.76
0.0756	3.647	-3.647
0.07564	-31.09	31.09
0.07568	-25.51	25.51
0.07572	-5.804	5.804
0.07576	16.28	-16.28
0.0758	3.531	-3.531
0.07584	-6.295	6.295
0.07588	23.1	-23.1
0.07592	-4.532	4.532
0.07596	1.884	-1.884
0.076	-19.76	19.76
0.07604	-16.5	16.5
0.07608	14.48	-14.48
0.07612	-17.1	17.1
0.07616	-9.272	9.272
0.0762	-23.09	23.09
0.07624	26.13	-26.13
0.07628	23.18	-23.18
0.07632	19.83	-19.83
0.07636	17.14	-17.14
0.0764	-13.14	13.14
0.07644	6.855	-6.855
0.07648	-10.05	10.05
0.07652	3.213	-3.213
0.07656	33.65	-33.65
0.0766	18.59	-18.59
0.07664	9.514	-9.514
0.07668	1.161	-1.161
0.07672	-4.85	4.85
0.07676	45.87	-45.87
0.0768	8.068	-8.068
0.07684	11.25	-11.25
0.07688	-11.87	11.87
0.07692	16.16	-16.16
0.07696	30.52	-30.52
0.077	23.68	-23.68
0.07704	3.3	-3.3
0.07708	-2.683	2.683
0.07712	-6.064	6.064
0.07716	25.64	-25.64
0.0772	6.739	-6.739
0.07724	1.97	-1.97
0.07728	-15.77	15.77
0.07732	3.04	-3.04
0.07736	30.09	-30.09
0.0774	18.56	-18.56
0.07744	14.48	-14.48
0.07748	10.61	-10.61
0.07752	17.63	-17.63
0.07756	28.94	-28.94
0.0776	23.79	-23.79
0.07764	15.12	-15.12
0.07768	8.3	-8.3
0.07772	1.046	-1.046
0.07776	7.982	-7.982
0.0778	1.913	-1.913
0.07784	-13.12	13.12
0.07788	13.79	-13.79
0.07792	36.83	-36.83
0.07796	17.92	-17.92
0.078	14.25	-14.25
0.07804	-6.816	6.816
0.07808	698.7m	-0.6987
0.07812	19.46	-19.46
0.07816	19.51	-19.51
0.0782	3.329	-3.329
0.07824	25.03	-25.03
0.07828	35.87	-35.87
0.07832	27.98	-27.98
0.07836	4.485	-4.485
0.0784	17.09	-17.09
0.07844	43.39	-43.39
0.07848	23.68	-23.68
0.07852	29.66	-29.66
0.07856	8.444	-8.444
0.0786	25.76	-25.76
0.07864	22.14	-22.14
0.07868	20.29	-20.29
0.07872	5.583	-5.583
0.07876	3.011	-3.011
0.0788	27.32	-27.32
0.07884	26.88	-26.88
0.07888	46.07	-46.07
0.07892	40.93	-40.93
0.07896	12.89	-12.89
0.079	44.37	-44.37
0.07904	33.96	-33.96
0.07908	16.51	-16.51
0.07912	5.063	-5.063
0.07916	12.58	-12.58
0.0792	42.92	-42.92
0.07924	7.635	-7.635
0.07928	19.28	-19.28
0.07932	27.4	-27.4
0.07936	36.94	-36.94
0.0794	13.53	-13.53
0.07944	27.84	-27.84
0.07948	18.65	-18.65
0.07952	33.59	-33.59
0.07956	37.61	-37.61
0.0796	38.7	-38.7
0.07964	32.49	-32.49
0.07968	57.75	-57.75
0.07972	47.4	-47.4
0.07976	28.73	-28.73
0.0798	36.28	-36.28
0.07984	37.52	-37.52
0.07988	42.72	-42.72
0.07992	37.17	-37.17
[truncated: 98,001 more rows]

## Sheet: Sheet1
		100	2500
time	data	butfilt1	Stress
0.437	8.752	9.74772	0.00389909
0.43704	29.33	9.73189	0.00389276
0.43708	60.6	9.71487	0.00388595
0.43712	47.51	9.69662	0.00387865
0.43716	27.71	9.67715	0.00387086
0.4372	-5.41	9.65646	0.00386258
0.43724	-8.097	9.63457	0.00385383
0.43728	-23.24	9.61149	0.00384459
0.43732	-20.78	9.58721	0.00383488
0.43736	-47	9.56174	0.00382469
0.4374	-18.88	9.53504	0.00381402
0.43744	-3.704	9.50708	0.00380283
0.43748	11.18	9.47781	0.00379112
0.43752	40.28	9.44717	0.00377887
0.43756	36.61	9.41511	0.00376604
0.4376	48.12	9.38158	0.00375263
0.43764	3.839	9.34655	0.00373862
0.43768	-4.774	9.30999	0.003724
0.43772	0.7175	9.27188	0.00370875
0.43776	6.035	9.23218	0.00369287
0.4378	3.29	9.19088	0.00367635
0.43784	-30.81	9.14793	0.00365917
0.43788	-33.62	9.1033	0.00364132
0.43792	5.457	9.05693	0.00362277
0.43796	28.72	9.00876	0.0036035
0.438	35.75	8.95873	0.00358349
0.43804	30.6	8.90678	0.00356271
0.43808	60.11	8.85286	0.00354114
0.43812	42.54	8.79693	0.00351877
0.43816	3.145	8.73896	0.00349558
0.4382	11.18	8.67894	0.00347158
0.43824	-9.051	8.61686	0.00344675
0.43828	17.62	8.55272	0.00342109
0.43832	-19.17	8.48648	0.00339459
0.43836	15.86	8.41815	0.00336726
0.4384	4.561	8.34769	0.00333908
0.43844	-0.3808	8.27509	0.00331004
0.43848	35.6	8.20032	0.00328013
0.43852	17.65	8.12337	0.00324935
0.43856	46.64	8.04421	0.00321768
0.4386	38.23	7.96285	0.00318514
0.43864	60.77	7.87927	0.00315171
0.43868	13.98	7.79351	0.0031174
0.43872	14.36	7.70559	0.00308224
0.43876	7.769	7.61556	0.00304622
0.4388	-8.444	7.52345	0.00300938
0.43884	-5.352	7.4293	0.00297172
0.43888	-14.66	7.33315	0.00293326
0.43892	4.359	7.23503	0.00289401
0.43896	5.024	7.13497	0.00285399
0.439	52.42	7.03298	0.00281319
0.43904	21.21	6.9291	0.00277164
0.43908	44.39	6.82336	0.00272934
0.43912	49.39	6.71581	0.00268632
0.43916	9.619	6.6065	0.0026426
0.4392	-15.12	6.49552	0.00259821
0.43924	-34.4	6.38292	0.00255317
0.43928	-24.34	6.26877	0.00250751
0.43932	-37.32	6.15314	0.00246126
0.43936	-9.542	6.03605	0.00241442
0.4394	7.654	5.91754	0.00236702
0.43944	0.4573	5.79762	0.00231905
0.43948	17.45	5.67632	0.00227053
0.43952	9.446	5.55364	0.00222146
0.43956	21.15	5.42962	0.00217185
0.4396	29.85	5.30426	0.0021217
0.43964	25.86	5.17761	0.00207104
0.43968	26.18	5.0497	0.00201988
0.43972	-4.629	4.92057	0.00196823
0.43976	-19.98	4.79028	0.00191611
0.4398	-25.5	4.65886	0.00186355
0.43984	-33.94	4.52637	0.00181055
0.43988	-26.42	4.39283	0.00175713
0.43992	-20.21	4.25825	0.0017033
0.43996	3.03	4.12263	0.00164905
0.44	8.347	3.98597	0.00159439
0.44004	13.38	3.84827	0.00153931
0.44008	25.57	3.70951	0.0014838
0.44012	30.75	3.5697	0.00142788
0.44016	13.84	3.42883	0.00137153
0.4402	-1.508	3.28693	0.00131477
0.44024	-3.733	3.14401	0.0012576
0.44028	-27.2	3.00009	0.00120004
0.44032	-14.57	2.85518	0.00114207
0.44036	-25.44	2.70928	0.00108371
0.4404	-33.07	2.56239	0.00102496
0.44044	7.018	2.41449	0.000965797
0.44048	7.047	2.26557	0.000906227
0.44052	24.36	2.11559	0.000846235
0.44056	33.17	1.96453	0.000785811
0.4406	57.51	1.81238	0.000724951
0.44064	23	1.65913	0.000663654
0.44068	14.3	1.50481	0.000601925
0.44072	1.527	1.34943	0.000539774
0.44076	-13.59	1.19303	0.000477213
0.4408	-30.03	1.03563	0.000414253
0.44084	-55.06	0.877258	0.000350903
0.44088	-23.68	0.71792	0.000287168
0.44092	-48.65	0.557613	0.000223045
0.44096	8.116	0.396317	0.000158527
0.441	21.61	0.234002	9.36008e-05
0.44104	47.02	0.0706375	2.8255e-05
0.44108	34.5	-0.0937992	-3.75197e-05
0.44112	29.04	-0.259317	-0.000103727
0.44116	17.36	-0.425912	-0.000170365
0.4412	-5.265	-0.593569	-0.000237427
0.44124	-0.6409	-0.762265	-0.000304906
0.44128	-54.92	-0.931979	-0.000372792
0.44132	-36.1	-1.1027	-0.000441078
0.44136	-45.44	-1.27441	-0.000509765
0.4414	-9.369	-1.44714	-0.000578857
0.44144	-2.346	-1.62091	-0.000648363
0.44148	-8.358	-1.79574	-0.000718297
0.44152	14.71	-1.97168	-0.000788672
0.44156	59.94	-2.14875	-0.0008595
0.4416	40.23	-2.32698	-0.000930791
0.44164	40.31	-2.50637	-0.00100255
0.44168	10.92	-2.68691	-0.00107476
0.44172	-17.4	-2.86858	-0.00114743
0.44176	-37.09	-3.05134	-0.00122054
0.4418	-42.72	-3.23518	-0.00129407
0.44184	-42.23	-3.42008	-0.00136803
0.44188	-35.03	-3.60604	-0.00144242
0.44192	-13.79	-3.79307	-0.00151723
0.44196	-10.55	-3.9812	-0.00159248
0.442	14.1	-4.17046	-0.00166818
0.44204	15.14	-4.36087	-0.00174435
0.44208	18.61	-4.55248	-0.00182099
0.44212	30.28	-4.74529	-0.00189812
0.44216	16.38	-4.93931	-0.00197573
0.4422	22.48	-5.13455	-0.00205382
0.44224	2.076	-5.33099	-0.0021324
0.44228	-4.485	-5.52861	-0.00221145
0.44232	-15.15	-5.72739	-0.00229096
0.44236	-11.91	-5.9273	-0.00237092
0.4424	-29.05	-6.12833	-0.00245133
0.44244	-18.15	-6.33044	-0.00253218
0.44248	-2.202	-6.53364	-0.00261345
0.44252	-4.138	-6.7379	-0.00269516
0.44256	-3.3	-6.94323	-0.00277729
0.4426	-16.07	-7.14962	-0.00285985
0.44264	5.255	-7.35705	-0.00294282
0.44268	7.769	-7.56551	-0.00302621
0.44272	24.45	-7.775	-0.00311
0.44276	2.769	-7.98549	-0.0031942
0.4428	0.4284	-8.19696	-0.00327878
0.44284	-25.7	-8.40936	-0.00336374
0.44288	8.492	-8.62267	-0.00344907
0.44292	29.79	-8.83685	-0.00353474
0.44296	-14.6	-9.05186	-0.00362074
0.443	-31.88	-9.26764	-0.00370706
0.44304	-43.67	-9.48416	-0.00379366
0.44308	-41.39	-9.70136	-0.00388055
0.44312	-57.58	-9.91923	-0.00396769
0.44316	-32.89	-10.1378	-0.0040551
0.4432	-11.33	-10.3569	-0.00414277
0.44324	-27.11	-10.5767	-0.00423069
0.44328	-25.81	-10.7972	-0.00431889
0.44332	5.139	-11.0184	-0.00440736
0.44336	11.61	-11.2403	-0.00449611
0.4434	-0.8143	-11.4629	-0.00458515
0.44344	3.752	-11.6862	-0.00467448
0.44348	3.203	-11.9103	-0.00476411
0.44352	-7.895	-12.1351	-0.00485404
0.44356	-0.9877	-12.3606	-0.00494425
0.4436	8.665	-12.5869	-0.00503476
0.44364	-11.28	-12.8139	-0.00512555
0.44368	-7.982	-13.0415	-0.00521661
0.44372	-17.11	-13.2698	-0.00530793
0.44376	-5.641	-13.4988	-0.00539952
0.4438	-3.358	-13.7284	-0.00549135
0.44384	-23.07	-13.9585	-0.00558341
0.44388	-11.02	-14.1893	-0.0056757
0.44392	-2.404	-14.4205	-0.00576821
0.44396	-14.92	-14.6523	-0.00586091
0.444	-8.04	-14.8845	-0.00595381
0.44404	-8.907	-15.1172	-0.00604688
0.44408	-20.21	-15.3503	-0.00614011
0.44412	-19.14	-15.5837	-0.00623348
0.44416	-0.06288	-15.8175	-0.00632699
0.4442	-6.97	-16.0516	-0.00642062
0.44424	-17.46	-16.2859	-0.00651435
0.44428	-6.941	-16.5204	-0.00660816
0.44432	-12.32	-16.7551	-0.00670204
0.44436	-11.16	-16.9899	-0.00679596
0.4444	-0.9877	-17.2248	-0.00688992
0.44444	-8.618	-17.4597	-0.00698387
0.44448	-12.4	-17.6945	-0.00707781
0.44452	-12.75	-17.9293	-0.00717171
0.44456	13.06	-18.1639	-0.00726554
0.4446	-10.03	-18.3982	-0.00735928
0.44464	5.977	-18.6322	-0.00745289
0.44468	-8.329	-18.8658	-0.00754634
0.44472	-12.26	-19.099	-0.00763959
0.44476	-15.84	-19.3315	-0.00773261
0.4448	4.214	-19.5634	-0.00782536
0.44484	-12.63	-19.7945	-0.00791779
0.44488	14.19	-20.0247	-0.00800987
0.44492	-10.06	-20.2539	-0.00810154
0.44496	5.891	-20.4819	-0.00819276
0.445	12.36	-20.7087	-0.00828348
0.44504	-17.37	-20.9341	-0.00837363
0.44508	-4.225	-21.1579	-0.00846316
0.44512	-30.58	-21.38	-0.00855201
0.44516	-8.791	-21.6003	-0.0086401
0.4452	2.018	-21.8185	-0.00872739
0.44524	-0.323	-22.0345	-0.00881379
0.44528	-17.26	-22.2481	-0.00889925
0.44532	-17.06	-22.4592	-0.00898369
0.44536	-9.485	-22.6676	-0.00906703
0.4454	-1.508	-22.873	-0.00914921
0.44544	-19.48	-23.0753	-0.00923014
0.44548	-2.808	-23.2744	-0.00930974
0.44552	-47.4	-23.4699	-0.00938795
0.44556	-66.36	-23.6617	-0.00946466
0.4456	-8.704	-23.8495	-0.00953982
0.44564	-28.27	-24.0333	-0.00961333
0.44568	-85	-24.2128	-0.00968512
0.44572	-69.17	-24.3878	-0.00975513
0.44576	-58.79	-24.5582	-0.00982329
0.4458	-34.89	-24.7238	-0.00988953
0.44584	-58.85	-24.8845	-0.00995382
0.44588	-37.98	-25.0402	-0.0100161
0.44592	-21.85	-25.1907	-0.0100763
0.44596	-24.72	-25.336	-0.0101344
0.446	-38.39	-25.4758	-0.0101903
0.44604	-62.58	-25.6102	-0.0102441
0.44608	-12.11	-25.739	-0.0102956
0.44612	-33.99	-25.8622	-0.0103449
0.44616	-33.1	-25.9795	-0.0103918
0.4462	-61.65	-26.091	-0.0104364
0.44624	-20.76	-26.1965	-0.0104786
0.44628	-24.8	-26.2961	-0.0105184
0.44632	-55.26	-26.3895	-0.0105558
0.44636	-53.65	-26.4767	-0.0105907
0.4464	-47.43	-26.5576	-0.0106231
0.44644	-11.28	-26.6323	-0.0106529
0.44648	-30.21	-26.7006	-0.0106802
0.44652	-33.36	-26.7625	-0.010705
0.44656	-63.21	-26.8179	-0.0107272
0.4466	-31.16	-26.8668	-0.0107467
0.44664	-25.41	-26.9092	-0.0107637
0.44668	-49.19	-26.945	-0.010778
0.44672	-66.1	-26.9742	-0.0107897
0.44676	-45.47	-26.9968	-0.0107987
0.4468	-55.78	-27.0127	-0.0108051
0.44684	-58.3	-27.0219	-0.0108088
0.44688	-51.25	-27.0246	-0.0108098
0.44692	-25.73	-27.0206	-0.0108082
0.44696	-6.739	-27.01	-0.010804
0.447	-36.65	-26.9929	-0.0107972
0.44704	-61.48	-26.9692	-0.0107877
0.44708	-63.7	-26.9391	-0.0107756
0.44712	-1.421	-26.9025	-0.010761
0.44716	-24.05	-26.8594	-0.0107438
0.4472	-40.9	-26.8101	-0.010724
0.44724	-69.4	-26.7543	-0.0107017
0.44728	-41.45	-26.6924	-0.0106769
0.44732	-41.97	-26.6242	-0.0106497
0.44736	-26.83	-26.5499	-0.01062
0.4474	11.01	-26.4695	-0.0105878
0.44744	-40.21	-26.3832	-0.0105533
0.44748	3.463	-26.291	-0.0105164
0.44752	-25.09	-26.1929	-0.0104772
0.44756	-24.48	-26.089	-0.0104356
0.4476	-15.09	-25.9794	-0.0103918
0.44764	-12.52	-25.8642	-0.0103457
0.44768	-6.537	-25.7433	-0.0102973
0.44772	-5.496	-25.6168	-0.0102467
0.44776	-88.15	-25.4848	-0.0101939
0.4478	-44.43	-25.3473	-0.0101389
0.44784	-32.84	-25.2044	-0.0100818
0.44788	0.7464	-25.0561	-0.0100224
0.44792	-77.69	-24.9025	-0.00996099
0.44796	-67.06	-24.7436	-0.00989744
0.448	-19.63	-24.5796	-0.00983183
0.44804	-16.22	-24.4104	-0.00976418
0.44808	-11.74	-24.2363	-0.00969453
0.44812	-65.06	-24.0573	-0.00962292
0.44816	-54.83	-23.8735	-0.00954939
0.4482	-15.73	-23.6849	-0.00947397
0.44824	-60.06	-23.4918	-0.00939671
0.44828	-30.24	-23.2941	-0.00931765
0.44832	-25.81	-23.0921	-0.00923684
0.44836	-1.45	-22.8858	-0.00915434
0.4484	-24.86	-22.6755	-0.00907019
0.44844	-18.96	-22.4611	-0.00898444
0.44848	-22.58	-22.2428	-0.00889713
0.44852	-15.21	-22.0208	-0.00880833
0.44856	-16.62	-21.7952	-0.00871807
0.4486	0.05273	-21.566	-0.0086264
0.44864	-38.15	-21.3334	-0.00853337
0.44868	-38.53	-21.0975	-0.00843902
0.44872	-47.11	-20.8585	-0.00834339
0.44876	-17.32	-20.6163	-0.00824654
0.4488	-17.84	-20.3713	-0.00814851
0.44884	-17.2	-20.1234	-0.00804936
0.44888	-15	-19.8728	-0.00794913
0.44892	-20.06	-19.6197	-0.00784788
0.44896	-10.38	-19.3642	-0.00774566
0.449	-11.62	-19.1063	-0.00764252
0.44904	-16.07	-18.8462	-0.0075385
0.44908	-13.24	-18.5841	-0.00743365
0.44912	-0.005073	-18.32	-0.00732802
0.44916	8.694	-18.0541	-0.00722166
0.4492	15.43	-17.7865	-0.0071146
0.44924	-15.44	-17.5172	-0.00700688
0.44928	-16.31	-17.2464	-0.00689855
0.44932	-34.22	-16.9741	-0.00678963
0.44936	-29.74	-16.7004	-0.00668016
0.4494	-26.39	-16.4254	-0.00657018
0.44944	-38.44	-16.1493	-0.00645971
0.44948	-11.91	-15.872	-0.00634881
0.44952	-10.64	-15.5938	-0.0062375
0.44956	3.983	-15.3146	-0.00612585
0.4496	11.64	-15.0347	-0.00601388
0.44964	2.48	-14.7541	-0.00590163
0.44968	-21.31	-14.4728	-0.00578914
0.44972	-33.65	-14.1911	-0.00567644
0.44976	1.209	-13.9089	-0.00556356
0.4498	-4.022	-13.6264	-0.00545055
0.44984	-11.51	-13.3436	-0.00533742
0.44988	-21.57	-13.0606	-0.00522422
0.44992	-37.14	-12.7774	-0.00511098
0.44996	-2.953	-12.4943	-0.00499772
0.45	-11.8	-12.2112	-0.00488449
0.45004	0.3706	-11.9283	-0.00477132
0.45008	-2.491	-11.6456	-0.00465824
0.45012	-30.67	-11.3632	-0.00454529
0.45016	-6.45	-11.0813	-0.0044325
0.4502	4.157	-10.7998	-0.00431991
0.45024	5.573	-10.5188	-0.00420754
0.45028	-10.67	-10.2386	-0.00409543
0.45032	3.55	-9.95902	-0.00398361
0.45036	11.15	-9.68026	-0.00387211
0.4504	-11.02	-9.40236	-0.00376095
0.45044	-3.936	-9.12539	-0.00365015
0.45048	-12.72	-8.84939	-0.00353976
0.45052	-14.57	-8.57443	-0.00342977
0.45056	15.46	-8.30057	-0.00332023
0.4506	-32.75	-8.02787	-0.00321115
0.45064	0.3706	-7.75638	-0.00310255
0.45068	-2.202	-7.48616	-0.00299447
0.45072	-5.438	-7.21728	-0.00288691
0.45076	16.38	-6.94978	-0.00277991
0.4508	9.157	-6.68373	-0.00267349
0.45084	4.301	-6.41916	-0.00256766
0.45088	8.058	-6.15612	-0.00246245
0.45092	-3.704	-5.89465	-0.00235786
0.45096	7.943	-5.63477	-0.00225391
0.451	4.388	-5.37652	-0.00215061
0.45104	-8.502	-5.11992	-0.00204797
0.45108	2.336	-4.86498	-0.00194599
0.45112	-21.33	-4.61174	-0.0018447
0.45116	0.5729	-4.36022	-0.00174409
0.4512	-1.681	-4.11043	-0.00164417
0.45124	5.139	-3.8624	-0.00154496
0.45128	3.839	-3.61615	-0.00144646
0.45132	-0.6698	-3.37169	-0.00134868
0.45136	3.665	-3.12906	-0.00125162
0.4514	-9.369	-2.88825	-0.0011553
0.45144	3.579	-2.64929	-0.00105972
0.45148	-0.3808	-2.41218	-0.000964874
0.45152	8.607	-2.17695	-0.000870779
0.45156	-6.017	-1.94359	-0.000777436
0.4516	1.902	-1.71212	-0.000684848
0.45164	6.642	-1.48255	-0.000593019
0.45168	-5.438	-1.25488	-0.00050195
0.45172	9.214	-1.02911	-0.000411645
0.45176	-9.225	-0.805259	-0.000322104
0.4518	-8.878	-0.583322	-0.000233329
0.45184	7.018	-0.363306	-0.000145322
0.45188	6.093	-0.145216	-5.80862e-05
0.45192	-5.67	0.0709434	2.83774e-05
0.45196	3.463	0.285167	0.000114067
0.452	-2.404	0.49745	0.00019898
0.45204	9.677	0.70779	0.000283116
0.45208	-3.965	0.916182	0.000366473
0.45212	16.82	1.12262	0.000449049
0.45216	12.45	1.32711	0.000530846
0.4522	-15.52	1.52966	0.000611863
0.45224	1.584	1.73026	0.000692102
0.45228	-0.5831	1.92891	0.000771564
0.45232	1.498	2.12562	0.00085025
0.45236	16.58	2.3204	0.000928159
0.4524	2.741	2.51323	0.00100529
0.45244	21.01	2.70412	0.00108165
0.45248	14.85	2.89309	0.00115724
0.45252	39.3	3.08014	0.00123206
0.45256	14.42	3.26529	0.00130612
0.4526	9.185	3.44857	0.00137943
0.45264	-13.04	3.63002	0.00145201
0.45268	-18.3	3.80968	0.00152387
0.45272	-9.629	3.98756	0.00159502
0.45276	4.012	4.1637	0.00166548
0.4528	13.26	4.33811	0.00173524
0.45284	26.67	4.51082	0.00180433
0.45288	20.66	4.68184	0.00187274
0.45292	13.81	4.85122	0.00194049
0.45296	28.06	5.01897	0.00200759
0.453	33.52	5.18515	0.00207406
0.45304	13.14	5.34981	0.00213992
0.45308	8.001	5.51299	0.0022052
0.45312	-13.04	5.67477	0.00226991
0.45316	-6.074	5.83521	0.00233408
0.4532	-19.6	5.99435	0.00239774
0.45324	-22.52	6.15225	0.0024609
0.45328	3.694	6.30896	0.00252358
0.45332	16.5	6.46451	0.0025858
0.45336	29.79	6.61892	0.00264757
0.4534	26.61	6.77225	0.0027089
0.45344	-4.34	6.92452	0.00276981
0.45348	4.099	7.07578	0.00283031
0.45352	4.619	7.22608	0.00289043
0.45356	7.394	7.37547	0.00295019
0.4536	-10.93	7.52399	0.0030096
0.45364	-1.97	7.67168	0.00306867
0.45368	-22.92	7.81858	0.00312743
0.45372	-17.23	7.96471	0.00318589
0.45376	-5.843	8.11011	0.00324404
0.4538	36.64	8.25477	0.00330191
0.45384	25.51	8.39872	0.00335949
0.45388	24.94	8.54197	0.00341679
0.45392	25.6	8.68454	0.00347382
0.45396	15.98	8.82646	0.00353058
0.454	18.67	8.96776	0.0035871
0.45404	-16.71	9.10849	0.0036434
0.45408	-22.63	9.24868	0.00369947
0.45412	-20.78	9.38836	0.00375535
0.45416	-0.2652	9.52756	0.00381102
0.4542	3.579	9.66628	0.00386651
0.45424	5.631	9.80453	0.00392181
0.45428	9.735	9.94231	0.00397692
0.45432	21.76	10.0796	0.00403185
0.45436	14.88	10.2165	0.00408659
0.4544	24.91	10.3529	0.00414114
0.45444	-0.5253	10.4888	0.00419551
0.45448	-32.2	10.6243	0.00424971
0.45452	-11.07	10.7593	0.00430372
0.45456	-16.39	10.8939	0.00435755
0.4546	-12.35	11.028	0.0044112
0.45464	-6.884	11.1616	0.00446465
0.45468	6.411	11.2947	0.00451788
0.45472	-19.34	11.4272	0.00457088
0.45476	15.92	11.5591	0.00462363
0.4548	23.72	11.6903	0.00467611
0.45484	4.272	11.8207	0.00472829
0.45488	8.087	11.9504	0.00478015
0.45492	-12.72	12.0792	0.00483167
0.45496	-28.79	12.2071	0.00488282
0.455	-40.26	12.334	0.00493359
0.45504	-23.53	12.4598	0.00498392
0.45508	-25.7	12.5845	0.00503378
0.45512	-17.84	12.7078	0.00508313
0.45516	4.475	12.8298	0.0051319
0.4552	-11.28	12.9501	0.00518005
0.45524	8.405	13.0688	0.00522751
0.45528	11.15	13.1856	0.00527422
0.45532	21.61	13.3003	0.00532012
0.45536	24.97	13.4128	0.00536513
0.4554	25.51	13.523	0.00540921
0.45544	13.61	13.6307	0.00545228
0.45548	-3.387	13.7357	0.00549428
0.45552	-26.31	13.8379	0.00553515
0.45556	-11.57	13.9371	0.00557484
0.4556	-25.64	14.0332	0.00561327
0.45564	16.56	14.1259	0.00565036
0.45568	31.21	14.2151	0.00568604
0.45572	99.07	14.3006	0.00572024
0.45576	92.83	14.3822	0.00575288
0.4558	56.41	14.4597	0.00578389
0.45584	16.84	14.5331	0.00581324
0.45588	56.44	14.6021	0.00584086
0.45592	29.21	14.6668	0.00586672
0.45596	-15.58	14.7269	0.00589078
0.456	-39.25	14.7825	0.005913
0.45604	21.67	14.8334	0.00593334
0.45608	53.98	14.8794	0.00595176
0.45612	33.03	14.9205	0.00596822
0.45616	58.2	14.9567	0.00598267
0.4562	50.37	14.9877	0.00599507
0.45624	106	15.0135	0.0060054
0.45628	42.6	15.0341	0.00601364
0.45632	52.1	15.0494	0.00601976
0.45636	86.44	15.0594	0.00602377
0.4564	66.79	15.0642	0.00602567
0.45644	60.89	15.0637	0.00602546
0.45648	37.42	15.0579	0.00602317
0.45652	-14.05	15.047	0.00601882
0.45656	-8.329	15.0311	0.00601244
0.4566	-4.311	15.0101	0.00600405
0.45664	-29.92	14.9842	0.00599368
0.45668	14.68	14.9533	0.00598134
0.45672	45.77	14.9176	0.00596705
0.45676	64.88	14.877	0.00595082
0.4568	63	14.8317	0.00593267
0.45684	43.17	14.7816	0.00591263
0.45688	47.74	14.7268	0.00589072
0.45692	18.95	14.6675	0.00586699
0.45696	40.95	14.6037	0.00584147
0.457	-14.63	14.5355	0.00581421
0.45704	2.972	14.4631	0.00578526
0.45708	-17.4	14.3866	0.00575464
0.45712	11.58	14.306	0.00572241
0.45716	-6.999	14.2215	0.0056886
0.4572	-20.93	14.1331	0.00565325
0.45724	5.977	14.0409	0.00561638
0.45728	26.5	13.9451	0.00557802
0.45732	55.31	13.8455	0.00553821
0.45736	44.76	13.7424	0.00549697
0.4574	63.29	13.6358	0.00545432
0.45744	43.92	13.5258	0.00541032
0.45748	10.34	13.4125	0.00536501
0.45752	3.001	13.2961	0.00531843
0.45756	-12.37	13.1766	0.00527064
0.4576	4.417	13.0542	0.00522168
0.45764	-17.87	12.929	0.0051716
0.45768	-49.98	12.8011	0.00512044
0.45772	-0.8143	12.6706	0.00506824
0.45776	21.01	12.5376	0.00501502
0.4578	33.38	12.4021	0.00496083
0.45784	18.78	12.2642	0.00490568
0.45788	33.09	12.124	0.00484961
0.45792	33.12	11.9816	0.00479265
0.45796	-15.87	11.8371	0.00473484
0.458	6.18	11.6905	0.00467621
0.45804	7.047	11.542	0.00461679
0.45808	34.16	11.3916	0.00455663
0.45812	20.28	11.2394	0.00449575
0.45816	-23.5	11.0855	0.0044342
0.4582	-12.29	10.93	0.004372
0.45824	-0.06288	10.773	0.00430919
0.45828	3.897	10.6145	0.00424579
0.45832	-2.895	10.4546	0.00418185
0.45836	13.35	10.2934	0.00411738
0.4584	32.16	10.131	0.0040524
0.45844	18.78	9.96738	0.00398695
0.45848	39.07	9.80262	0.00392105
0.45852	-17.17	9.63682	0.00385473
0.45856	-1.248	9.47004	0.00378802
0.4586	-17.58	9.30236	0.00372095
0.45864	-23.15	9.13386	0.00365354
0.45868	16.5	8.96458	0.00358583
0.45872	2.423	8.79458	0.00351783
0.45876	38.12	8.62392	0.00344957
0.4588	19.68	8.45263	0.00338105
0.45884	21.76	8.28078	0.00331231
0.45888	6.151	8.10843	0.00324337
0.45892	-6.855	7.93565	0.00317426
0.45896	-13.7	7.76249	0.003105
0.459	14.53	7.58903	0.00303561
0.45904	0.7464	7.41532	0.00296613
0.45908	13.38	7.24141	0.00289656
0.45912	-14.17	7.06735	0.00282694
0.45916	-0.2074	6.89321	0.00275728
0.4592	-10.32	6.71902	0.00268761
0.45924	-9.889	6.54484	0.00261793
0.45928	14.24	6.37069	0.00254828
0.45932	13.61	6.19662	0.00247865
0.45936	23.61	6.02265	0.00240906
0.4594	9.937	5.84884	0.00233953
0.45944	8.145	5.67521	0.00227008
0.45948	-0.8143	5.50181	0.00220073
0.45952	-2.606	5.3287	0.00213148
0.45956	-20.67	5.1559	0.00206236
0.4596	6.122	4.98347	0.00199339
0.45964	-21.42	4.81144	0.00192457
0.45968	11.87	4.63982	0.00185593
0.45972	12.65	4.46866	0.00178746
0.45976	2.596	4.29797	0.00171919
0.4598	7.336	4.12777	0.00165111
0.45984	7.827	3.95811	0.00158324
0.45988	14.1	3.78899	0.0015156
0.45992	-8.444	3.62046	0.00144818
0.45996	5.544	3.45254	0.00138101
0.46	-8.242	3.28526	0.0013141
0.46004	-17.14	3.11865	0.00124746
0.46008	-16.36	2.95273	0.00118109
0.46012	-6.595	2.78752	0.00111501
0.46016	-12.81	2.62303	0.00104921
0.4602	-7.722	2.45927	0.000983706
0.46024	-10.15	2.29622	0.000918488
0.46028	-9.716	2.13389	0.000853558
0.46032	-7.259	1.97227	0.00078891
0.46036	-6.97	1.81135	0.000724539
0.4604	28.06	1.6511	0.000660438
0.46044	7.972	1.4915	0.0005966
0.46048	7.74	1.33255	0.00053302
0.46052	1.267	1.17423	0.000469694
0.46056	-4.427	1.01654	0.000406618
0.4606	16.21	0.859475	0.00034379
0.46064	-6.537	0.703019	0.000281208
0.46068	1.353	0.547172	0.000218869
0.46072	-16.54	0.391927	0.000156771
0.46076	-4.109	0.23728	9.49118e-05
0.4608	-28.33	0.083217	3.32868e-05
0.46084	7.22	-0.0702761	-2.81104e-05
0.46088	-17.11	-0.223221	-8.92882e-05
0.46092	-20.21	-0.375641	-0.000150256
0.46096	9.214	-0.527567	-0.000211027
0.461	-13.13	-0.67903	-0.000271612
0.46104	-10.84	-0.830067	-0.000332027
0.46108	-0.612	-0.980714	-0.000392286
0.46112	-9.889	-1.13101	-0.000452405
0.46116	2.741	-1.281	-0.000512402
0.4612	17.16	-1.43073	-0.000572293
0.46124	4.995	-1.58024	-0.000632095
0.46128	9.214	-1.72956	-0.000691823
0.46132	6.96	-1.87873	-0.00075149
0.46136	-21.68	-2.02777	-0.000811109
0.4614	-12.72	-2.17672	-0.00087069
0.46144	-10.47	-2.32562	-0.000930247
0.46148	-18.27	-2.47449	-0.000989795
0.46152	-12.89	-2.62338	-0.00104935
0.46156	-8.184	-2.77233	-0.00110893
0.4616	-8.097	-2.9214	-0.00116856
0.46164	11.06	-3.07064	-0.00122826
0.46168	3.232	-3.2201	-0.00128804
0.46172	-13.13	-3.36983	-0.00134793
0.46176	6.411	-3.51988	-0.00140795
0.4618	-19.98	-3.6703	-0.00146812
0.46184	-20.26	-3.82115	-0.00152846
0.46188	4.041	-3.97247	-0.00158899
0.46192	-12.95	-4.12431	-0.00164973
0.46196	-6.219	-4.27675	-0.0017107
0.462	-0.7276	-4.42984	-0.00177194
0.46204	-23.53	-4.58364	-0.00183346
0.46208	-17	-4.73822	-0.00189529
0.46212	2.885	-4.89363	-0.00195745
0.46216	18.87	-5.04995	-0.00201998
0.4622	-4.918	-5.20725	-0.0020829
0.46224	4.764	-5.36559	-0.00214624
0.46228	6.584	-5.52502	-0.00221001
0.46232	16.15	-5.68561	-0.00227424
0.46236	7.769	-5.84739	-0.00233896
0.4624	2.596	-6.01042	-0.00240417
0.46244	-2.953	-6.17473	-0.00246989
0.46248	-12.98	-6.34036	-0.00253614
0.46252	-1.017	-6.50733	-0.00260293
0.46256	-4.254	-6.67569	-0.00267028
0.4626	1.527	-6.84546	-0.00273818
0.46264	7.683	-7.01668	-0.00280667
0.46268	-1.45	-7.18936	-0.00287574
0.46272	15.17	-7.36354	-0.00294542
0.46276	2.452	-7.53923	-0.00301569
0.4628	0.9198	-7.71645	-0.00308658
0.46284	-28.41	-7.8952	-0.00315808
0.46288	-18.07	-8.07548	-0.00323019
0.46292	-1.855	-8.25732	-0.00330293
0.46296	-19.31	-8.44072	-0.00337629
0.463	-18.15	-8.6257	-0.00345028
0.46304	-12.23	-8.81227	-0.00352491
0.46308	-16.91	-9.00046	-0.00360018
0.46312	-20.44	-9.19028	-0.00367611
0.46316	-6.074	-9.38177	-0.00375271
0.4632	12.42	-9.57496	-0.00382998
0.46324	14.79	-9.76986	-0.00390794
0.46328	6.816	-9.9665	-0.0039866
0.46332	-4.022	-10.1649	-0.00406595
0.46336	-8.82	-10.365	-0.00414601
0.4634	-22.49	-10.5669	-0.00422677
0.46344	-23.21	-10.7706	-0.00430823
0.46348	-6.999	-10.976	-0.0043904
0.46352	-24.86	-11.1832	-0.00447327
0.46356	-18.15	-11.3922	-0.00455686
0.4636	-16.54	-11.6029	-0.00464117
0.46364	-5.294	-11.8155	-0.00472621
0.46368	1.96	-12.0299	-0.00481197
0.46372	16.09	-12.2462	-0.00489847
0.46376	5.428	-12.4643	-0.00498571
0.4638	6.584	-12.6842	-0.0050737
0.46384	-0.8721	-12.906	-0.00516242
0.46388	1.527	-13.1297	-0.00525187
0.46392	6.671	-13.3551	-0.00534205
0.46396	11.7	-13.5823	-0.00543294
0.464	-20.93	-13.8113	-0.00552452
0.46404	-7.086	-14.042	-0.0056168
0.46408	-2.664	-14.2743	-0.00570973
0.46412	-13.88	-14.5083	-0.00580332
0.46416	16.5	-14.7438	-0.00589753
0.4642	-16.57	-14.9809	-0.00599235
0.46424	-11.83	-15.2194	-0.00608775
0.46428	0.2261	-15.4593	-0.00618372
0.46432	14.82	-15.7005	-0.00628021
0.46436	11.64	-15.943	-0.00637722
0.4644	-4.629	-16.1867	-0.00647469
0.46444	-1.335	-16.4315	-0.00657261
0.46448	-0.6698	-16.6773	-0.00667092
0.46452	-15.15	-16.924	-0.00676959
0.46456	-18.42	-17.1714	-0.00686858
0.4646	-7.982	-17.4196	-0.00696783
0.46464	5.255	-17.6683	-0.00706732
0.46468	-0.6409	-17.9175	-0.00716699
0.46472	-24.57	-18.167	-0.00726678
0.46476	-18.21	-18.4167	-0.00736667
0.4648	-12.58	-18.6665	-0.00746658
0.46484	-17.29	-18.9162	-0.00756648
0.46488	-3.415	-19.1658	-0.0076663
0.46492	-17.06	-19.415	-0.007766
0.46496	11.15	-19.6638	-0.00786553
0.465	3.116	-19.9121	-0.00796482
0.46504	6.209	-20.1596	-0.00806382
0.46508	2.191	-20.4062	-0.00816247
0.46512	0.2839	-20.6517	-0.00826069
0.46516	-6.45	-20.896	-0.00835842
0.4652	-19.57	-21.1389	-0.00845558
0.46524	-20.58	-21.3802	-0.00855209
0.46528	-5.93	-21.6197	-0.00864789
0.46532	0.7753	-21.8572	-0.00874289
0.46536	-19.22	-22.0925	-0.00883701
0.4654	-9.803	-22.3254	-0.00893016
0.46544	4.995	-22.5557	-0.00902228
0.46548	-1.306	-22.7831	-0.00911326
0.46552	1.353	-23.0075	-0.00920302
0.46556	-78.27	-23.2287	-0.00929146
0.4656	-100.3	-23.4462	-0.0093785
0.46564	-29.08	-23.6601	-0.00946404
0.46568	-7.144	-23.87	-0.00954801
0.46572	-32.78	-24.0758	-0.00963033
0.46576	-67.92	-24.2773	-0.00971092
0.4658	-32.37	-24.4742	-0.0097897
0.46584	-27.46	-24.6665	-0.00986661
0.46588	-67.14	-24.8539	-0.00994157
0.46592	-38.7	-25.0363	-0.0100145
0.46596	-60.15	-25.2135	-0.0100854
0.466	-13.3	-25.3854	-0.0101542
0.46604	1.006	-25.5518	-0.0102207
0.46608	-23.65	-25.7126	-0.0102851
0.46612	-67.75	-25.8677	-0.0103471
0.46616	-53.85	-26.0168	-0.0104067
0.4662	-26.59	-26.1599	-0.010464
0.46624	-63.18	-26.2969	-0.0105188
0.46628	-60.09	-26.4276	-0.010571
0.46632	-35.44	-26.5519	-0.0106207
0.46636	-32.03	-26.6697	-0.0106679
0.4664	-58.5	-26.7809	-0.0107124
0.46644	-42.4	-26.8855	-0.0107542
0.46648	-60.32	-26.9833	-0.0107933
0.46652	-29.25	-27.0744	-0.0108298
0.46656	-21.62	-27.1586	-0.0108634
0.4666	-39.37	-27.2358	-0.0108943
0.46664	-67.6	-27.3061	-0.0109224
0.46668	-44.22	-27.3693	-0.0109477
0.46672	-35.52	-27.4255	-0.0109702
0.46676	-29.98	-27.4746	-0.0109899
0.4668	-32.87	-27.5166	-0.0110066
0.46684	-31.13	-27.5514	-0.0110206
0.46688	-58.73	-27.5791	-0.0110316
0.46692	-40.61	-27.5995	-0.0110398
0.46696	-30.61	-27.6128	-0.0110451
0.467	-29.8	-27.6188	-0.0110475
0.46704	-49.89	-27.6177	-0.0110471
0.46708	-53.5	-27.6093	-0.0110437
0.46712	-45.73	-27.5937	-0.0110375
0.46716	-61.3	-27.5709	-0.0110284
0.4672	-33.79	-27.541	-0.0110164
0.46724	-10.41	-27.5039	-0.0110016
0.46728	-29.69	-27.4598	-0.0109839
0.46732	-34.8	-27.4086	-0.0109634
0.46736	-35.38	-27.3503	-0.0109401
0.4674	-55.76	-27.2851	-0.010914
0.46744	-38.65	-27.2129	-0.0108852
0.46748	-36.33	-27.1339	-0.0108536
0.46752	-43.99	-27.048	-0.0108192
0.46756	-11.71	-26.9553	-0.0107821
0.4676	-13.73	-26.8559	-0.0107424
0.46764	-55.03	-26.7499	-0.0107
0.46768	-67.08	-26.6373	-0.0106549
0.46772	-48.04	-26.5181	-0.0106072
0.46776	1.267	-26.3925	-0.010557
0.4678	-48.07	-26.2605	-0.0105042
0.46784	-51.91	-26.1223	-0.0104489
0.46788	-67.49	-25.9779	-0.0103912
0.46792	-28.5	-25.8274	-0.010331
0.46796	-37.35	-25.6709	-0.0102684
0.468	-18.94	-25.5086	-0.0102034
0.46804	7.769	-25.3405	-0.0101362
0.46808	-13.47	-25.1669	-0.0100667
0.46812	-30.64	-24.9877	-0.00999507
0.46816	-19.86	-24.8031	-0.00992123
0.4682	-83.21	-24.6132	-0.00984527
0.46824	-51.36	-24.4181	-0.00976723
0.46828	-29.48	-24.2179	-0.00968716
0.46832	-49.95	-24.0128	-0.00960511
0.46836	2.307	-23.8028	-0.00952114
0.4684	-26.45	-23.5883	-0.00943531
0.46844	-29.4	-23.3692	-0.00934766
0.46848	-47.46	-23.1457	-0.00925827
0.46852	-2.693	-22.9179	-0.00916718
0.46856	-25.03	-22.6861	-0.00907445
0.4686	-16.39	-22.4503	-0.00898014
0.46864	-36.07	-22.2108	-0.00888431
0.46868	-0.5542	-21.9675	-0.00878701
0.46872	-4.282	-21.7208	-0.00868831
0.46876	-14.22	-21.4706	-0.00858825
0.4688	-36.83	-21.2172	-0.0084869
0.46884	-37.37	-20.9607	-0.00838429
0.46888	1.874	-20.7012	-0.00828049
0.46892	-0.8721	-20.4389	-0.00817556
0.46896	-17.89	-20.1738	-0.00806953
0.469	-14.6	-19.9062	-0.00796248
0.46904	3.723	-19.6361	-0.00785443
0.46908	-28.18	-19.3636	-0.00774545
0.46912	-15.47	-19.0889	-0.00763557
0.46916	-28.91	-18.8121	-0.00752484
0.4692	-17.52	-18.5333	-0.00741332
0.46924	-9.889	-18.2526	-0.00730104
0.46928	9.301	-17.9701	-0.00718806
0.46932	4.272	-17.686	-0.00707441
0.46936	2.596	-17.4003	-0.00696014
0.4694	-4.6	-17.1132	-0.00684528
0.46944	-44.34	-16.8247	-0.00672988
0.46948	-51.56	-16.5349	-0.00661396
0.46952	-28.39	-16.2439	-0.00649757
0.46956	-8.011	-15.9519	-0.00638075
0.4696	-12.75	-15.6588	-0.00626353
0.46964	-6.999	-15.3649	-0.00614597
0.46968	-22.98	-15.0703	-0.0060281
0.46972	9.619	-14.7749	-0.00590997
0.46976	1.353	-14.479	-0.00579162
0.4698	-1.161	-14.1827	-0.00567308
0.46984	2.191	-13.886	-0.0055544
0.46988	-14.54	-13.589	-0.00543561
0.46992	-18.59	-13.2918	-0.00531674
0.46996	-14.46	-12.9945	-0.00519782
0.47	0.4862	-12.6972	-0.00507889
0.47004	-30.84	-12.3999	-0.00495997
0.47008	-20.61	-12.1028	-0.00484111
0.47012	0.1394	-11.8058	-0.00472232
0.47016	13.81	-11.5091	-0.00460366
0.4702	1.556	-11.2129	-0.00448514
0.47024	-19.74	-10.917	-0.00436681
0.47028	-4.86	-10.6217	-0.00424868
0.47032	-0.7565	-10.327	-0.00413079
0.47036	-22.29	-10.0329	-0.00401316
0.4704	-0.901	-9.73956	-0.00389582
0.47044	-21.62	-9.44701	-0.0037788
0.47048	-32.52	-9.15532	-0.00366213
0.47052	-21.36	-8.86457	-0.00354583
0.47056	3.608	-8.57484	-0.00342994
0.4706	4.648	-8.2862	-0.00331448
0.47064	15.34	-7.99875	-0.0031995
0.47068	17.77	-7.71254	-0.00308502
0.47072	14.5	-7.42765	-0.00297106
0.47076	6.729	-7.14413	-0.00285765
0.4708	7.827	-6.86204	-0.00274482
0.47084	-3.618	-6.58142	-0.00263257
0.47088	3.405	-6.30229	-0.00252092
0.47092	-29.86	-6.02471	-0.00240988
0.47096	-8.444	-5.7487	-0.00229948
0.471	-18.85	-5.4743	-0.00218972
0.47104	-25.06	-5.20156	-0.00208062
0.47108	8.203	-4.93052	-0.00197221
0.47112	-1.71	-4.66123	-0.00186449
0.47116	-3.387	-4.39374	-0.0017575
0.4712	27.74	-4.12811	-0.00165124
0.47124	17.86	-3.86437	-0.00154575
0.47128	12.88	-3.60256	-0.00144103
0.47132	14.24	-3.34272	-0.00133709
0.47136	0.6308	-3.08485	-0.00123394
0.4714	4.995	-2.82898	-0.00113159
0.47144	-8.097	-2.57511	-0.00103004
0.47148	-3.647	-2.32326	-0.000929304
0.47152	-1.508	-2.07344	-0.000829374
0.47156	-11.85	-1.82565	-0.00073026
0.4716	-8.415	-1.57992	-0.000631967
0.47164	2.769	-1.33625	-0.000534499
0.47168	-9.311	-1.09466	-0.000437864
0.47172	24.71	-0.85517	-0.000342068
0.47176	23.75	-0.617793	-0.000247117
0.4718	10.95	-0.382537	-0.000153015
0.47184	7.423	-0.149405	-5.97621e-05
0.47188	16.64	0.081608	3.26432e-05
0.47192	13.26	0.310512	0.000124205
0.47196	-3.473	0.53732	0.000214928
0.472	-0.8721	0.76205	0.00030482
0.47204	-24.89	0.984719	0.000393888
0.47208	-4.254	1.20534	0.000482137
0.47212	4.388	1.42393	0.000569572
0.47216	1.931	1.64049	0.000656195
0.4722	7.509	1.85502	0.000742009
0.47224	36.64	2.06754	0.000827017
0.47228	1.151	2.27806	0.000911224
0.47232	2.047	2.48659	0.000994637
0.47236	12.34	2.69316	0.00107726
0.4724	25.69	2.89779	0.00115912
0.47244	2.163	3.10051	0.0012402
0.47248	10.69	3.30134	0.00132054
0.47252	2.798	3.50033	0.00140013
0.47256	6.642	3.69751	0.001479
0.4726	10.14	3.89292	0.00155717
0.47264	6.353	4.0866	0.00163464
0.47268	30.05	4.27858	0.00171143
0.47272	23.29	4.46891	0.00178757
0.47276	8.261	4.65765	0.00186306
0.4728	-3.589	4.84485	0.00193794
0.47284	2.798	5.03057	0.00201223
0.47288	-12.17	5.21487	0.00208595
0.47292	4.272	5.3978	0.00215912
0.47296	-0.06288	5.57941	0.00223176
0.473	1.729	5.75976	0.0023039
0.47304	0.2261	5.93888	0.00237555
0.47308	-15.32	6.11683	0.00244673
0.47312	9.185	6.29364	0.00251746
0.47316	8.492	6.46936	0.00258775
0.4732	15.02	6.64402	0.00265761
0.47324	12.13	6.81766	0.00272706
0.47328	25.37	6.99031	0.00279613
0.47332	14.45	7.16203	0.00286481
0.47336	-4.6	7.33285	0.00293314
0.4734	14.99	7.50283	0.00300113
0.47344	1.035	7.67202	0.00306881
0.47348	-12.11	7.84046	0.00313619
0.47352	-2.259	8.00821	0.00320328
0.47356	4.388	8.1753	0.00327012
0.4736	1.035	8.34177	0.00333671
0.47364	5.515	8.50765	0.00340306
0.47368	13.03	8.67298	0.00346919
0.47372	-0.7565	8.83778	0.00353511
0.47376	12.97	9.00209	0.00360084
0.4738	0.3128	9.16594	0.00366638
0.47384	8.781	9.32935	0.00373174
0.47388	10.43	9.49235	0.00379694
0.47392	2.567	9.65498	0.00386199
0.47396	-11.59	9.81724	0.0039269
0.474	-1.884	9.97917	0.00399167
0.47404	-7.23	10.1408	0.00405631
0.47408	-1.132	10.3021	0.00412083
0.47412	9.966	10.4631	0.00418522
0.47416	4.214	10.6237	0.0042495
0.4742	9.735	10.7841	0.00431365
0.47424	3.001	10.9442	0.00437767
0.47428	-11.77	11.1039	0.00444157
0.47432	-7.837	11.2633	0.00450534
0.47436	13.12	11.4224	0.00456897
0.4744	-7.317	11.5811	0.00463245
0.47444	3.665	11.7394	0.00469578
0.47448	-9.311	11.8973	0.00475893
0.47452	-8.618	12.0548	0.00482191
0.47456	-0.3519	12.2117	0.00488468
0.4746	-6.248	12.3681	0.00494723
0.47464	15.95	12.5239	0.00500954
0.47468	8.492	12.679	0.00507158
0.47472	1.064	12.8333	0.00513333
0.47476	22.08	12.9869	0.00519476
0.4748	13.2	13.1396	0.00525585
0.47484	15.43	13.2914	0.00531656
0.47488	8.405	13.4422	0.00537688
0.47492	-20.93	13.5919	0.00543677
0.47496	-30.29	13.7405	0.00549621
0.475	-15.9	13.8879	0.00555516
0.47504	-24.22	14.034	0.00561359
0.47508	-22.95	14.1786	0.00567146
0.47512	1.267	14.3218	0.0057287
0.47516	-2.462	14.4632	0.00578528
0.4752	0.1683	14.6028	0.00584112
0.47524	12.86	14.7404	0.00589617
0.47528	18.43	14.8759	0.00595038
0.47532	5.92	15.0092	0.00600367
0.47536	9.128	15.1399	0.00605598
0.4754	21.61	15.2681	0.00610724
0.47544	13.49	15.3935	0.0061574
0.47548	9.792	15.516	0.0062064
0.47552	28.61	15.6354	0.00625415
0.47556	11.35	15.7515	0.00630061
0.4756	12.8	15.8642	0.0063457
0.47564	19.13	15.9734	0.00638936
0.47568	22.48	16.0788	0.00643154
0.47572	7.74	16.1804	0.00647215
0.47576	45.31	16.2779	0.00651115
0.4758	99.76	16.3712	0.00654847
0.47584	62.07	16.4601	0.00658405
0.47588	42.62	16.5446	0.00661785
0.47592	8.087	16.6246	0.00664982
0.47596	19.94	16.6998	0.00667993
0.476	37.91	16.7704	0.00670814
0.47604	70.6	16.8361	0.00673442
0.47608	8.116	16.8968	0.00675874
0.47612	6.902	16.9527	0.00678106
0.47616	31.18	17.0034	0.00680137
0.4762	46.55	17.0491	0.00681964
0.47624	23.9	17.0896	0.00683585
0.47628	14.36	17.1249	0.00684997
0.47632	60.14	17.155	0.00686198
0.47636	35.46	17.1797	0.00687188
0.4764	48.38	17.1991	0.00687964
0.47644	-9.34	17.2131	0.00688526
0.47648	16.87	17.2218	0.00688872
0.47652	50.66	17.2251	0.00689003
0.47656	47.77	17.2229	0.00688917
0.4766	11.3	17.2154	0.00688615
0.47664	37.77	17.2024	0.00688095
0.47668	6.989	17.184	0.00687359
0.47672	64.24	17.1602	0.00686407
0.47676	48.61	17.131	0.00685239
0.4768	21.61	17.0964	0.00683856
0.47684	-3.097	17.0565	0.00682259
0.47688	30.51	17.0112	0.0068045
0.47692	43.52	16.9607	0.0067843
0.47696	25.57	16.905	0.00676201
0.477	8.896	16.8441	0.00673764
0.47704	26.24	16.778	0.00671122
0.47708	30.4	16.7069	0.00668276
0.47712	34.27	16.6307	0.00665229
0.47716	22.45	16.5495	0.00661982
0.4772	18.46	16.4635	0.00658539
0.47724	48.03	16.3725	0.00654901
0.47728	23.81	16.2768	0.00651072
0.47732	54.3	16.1764	0.00647055
0.47736	22.83	16.0713	0.00642852
0.4774	7.856	15.9617	0.00638469
0.47744	-3.3	15.8477	0.00633909
0.47748	8.579	15.7294	0.00629175
0.47752	11.06	15.6068	0.00624271
0.47756	20.17	15.48	0.00619201
0.4776	14.68	15.3492	0.00613968
0.47764	19.01	15.2144	0.00608575
0.47768	7.394	15.0757	0.00603027
0.47772	10.43	14.9331	0.00597326
0.47776	2.798	14.7869	0.00591475
0.4778	-3.329	14.637	0.00585479
0.47784	18.69	14.4835	0.0057934
0.47788	58	14.3265	0.00573062
0.47792	22.54	14.1662	0.00566646
0.47796	5.977	14.0024	0.00560098
0.478	-9.947	13.8355	0.00553419
0.47804	35.77	13.6654	0.00546615
0.47808	11.7	13.4922	0.00539688
0.47812	23.84	13.316	0.00532641
0.47816	15.6	13.137	0.00525479
0.4782	23.61	12.9551	0.00518205
0.47824	43.2	12.7706	0.00510824
0.47828	4.099	12.5834	0.00503338
0.47832	28.61	12.3938	0.00495752
0.47836	-2.057	12.2018	0.0048807
0.4784	15.66	12.0074	0.00480298
0.47844	-8.097	11.811	0.00472439
0.47848	12.02	11.6124	0.00464497
0.47852	9.59	11.4119	0.00456477
0.47856	8.058	11.2096	0.00448383
0.4786	14.68	11.0055	0.00440218
0.47864	13.12	10.7997	0.00431988
0.47868	26.61	10.5924	0.00423695
0.47872	1.238	10.3836	0.00415344
0.47876	9.619	10.1735	0.00406939
0.4788	5.11	9.96211	0.00398484
0.47884	5.342	9.74961	0.00389985
0.47888	35.95	9.53608	0.00381443
0.47892	-13.79	9.32162	0.00372865
0.47896	-5.525	9.10633	0.00364253
0.479	12.54	8.89031	0.00355613
0.47904	7.856	8.67368	0.00346947
0.47908	-7.808	8.45651	0.00338261
0.47912	1.671	8.23892	0.00329557
0.47916	19.88	8.02098	0.00320839
0.4792	-1.97	7.8028	0.00312112
0.47924	22.88	7.58445	0.00303378
0.47928	11.44	7.36604	0.00294642
0.47932	13.29	7.14766	0.00285906
0.47936	0.9487	6.9294	0.00277176
0.4794	-26.02	6.71136	0.00268454
0.47944	-45.32	6.49363	0.00259745
0.47948	-24.95	6.27629	0.00251052
0.47952	-23.56	6.05942	0.00242377
0.47956	4.532	5.84305	0.00233722
0.4796	5.949	5.62724	0.0022509
0.47964	22.48	5.41202	0.00216481
0.47968	16.5	5.19743	0.00207897
0.47972	6.989	4.98353	0.00199341
0.47976	1.729	4.77035	0.00190814
0.4798	23.09	4.55794	0.00182318
0.47984	17.65	4.34637	0.00173855
0.47988	10.8	4.13568	0.00165427
0.47992	-25.35	3.92593	0.00157037
0.47996	-30.64	3.71719	0.00148688
0.48	-19.4	3.5095	0.0014038
0.48004	-53.62	3.30291	0.00132116
0.48008	-43.36	3.09744	0.00123898
0.48012	-16.45	2.8931	0.00115724
0.48016	12.13	2.68988	0.00107595
0.4802	17.02	2.48777	0.000995107
0.48024	-1.392	2.28675	0.000914701
0.48028	15.8	2.08682	0.000834729
0.48032	25.92	1.88797	0.000755187
0.48036	-1.826	1.69018	0.000676073
0.4804	-2.173	1.49347	0.000597388
0.48044	-25.15	1.29783	0.000519132
0.48048	-4.658	1.10326	0.000441305
0.48052	-11.59	0.909759	0.000363904
0.48056	-10.76	0.717309	0.000286924
0.4806	-14.8	0.525895	0.000210358
0.48064	-10.73	0.335496	0.000134199
0.48068	-1.421	0.146086	5.84344e-05
0.48072	-15.99	-0.0423664	-1.69465e-05
0.48076	-3.907	-0.229895	-9.19578e-05
0.4808	14.19	-0.416535	-0.000166614
0.48084	19.65	-0.602325	-0.00024093
0.48088	-0.9588	-0.787297	-0.000314919
0.48092	-7.577	-0.971482	-0.000388593
0.48096	-12.32	-1.15491	-0.000461962
0.481	-12.69	-1.3376	-0.00053504
0.48104	-28.56	-1.5196	-0.000607838
0.48108	-11.59	-1.70093	-0.000680374
0.48112	-36.83	-1.88166	-0.000752665
0.48116	14.47	-2.06184	-0.000824735
0.4812	11.99	-2.24152	-0.000896606
0.48124	23.2	-2.42076	-0.000968302
0.48128	25.6	-2.59961	-0.00103984
0.48132	-20.41	-2.77813	-0.00111125
0.48136	-2.346	-2.95634	-0.00118254
0.4814	-10.58	-3.13429	-0.00125372
0.48144	2.827	-3.31202	-0.00132481
0.48148	-10.32	-3.48957	-0.00139583
0.48152	-19.05	-3.66697	-0.00146679
0.48156	-21.85	-3.84428	-0.00153771
0.4816	-7.779	-4.02155	-0.00160862
0.48164	-0.612	-4.19882	-0.00167953
0.48168	3.261	-4.37615	-0.00175046
0.48172	8.347	-4.55361	-0.00182144
0.48176	26.24	-4.73123	-0.00189249
0.4818	15.89	-4.90907	-0.00196363
0.48184	12.65	-5.08716	-0.00203487
0.48188	6.324	-5.26554	-0.00210621
0.48192	-0.7565	-5.44421	-0.00217768
0.48196	12.16	-5.62321	-0.00224928
0.482	-17.89	-5.80253	-0.00232101
0.48204	-21.68	-5.9822	-0.00239288
0.48208	-5.005	-6.16222	-0.00246489
0.48212	-4.976	-6.34262	-0.00253705
0.48216	-1.652	-6.5234	-0.00260936
0.4822	-6.277	-6.70458	-0.00268183
0.48224	-25.35	-6.88618	-0.00275447
0.48228	0.4573	-7.06822	-0.00282729
0.48232	-7.375	-7.25071	-0.00290028
0.48236	-2.924	-7.43368	-0.00297347
0.4824	9.272	-7.61713	-0.00304685
0.48244	-1.941	-7.8011	-0.00312044
0.48248	-2.086	-7.98558	-0.00319423
0.48252	-1.017	-8.1706	-0.00326824
0.48256	-9.311	-8.35614	-0.00334246
0.4826	-9.629	-8.54223	-0.00341689
0.48264	-1.826	-8.72885	-0.00349154
0.48268	-15.96	-8.91602	-0.00356641
0.48272	-6.017	-9.10374	-0.0036415
0.48276	5.428	-9.292	-0.0037168
0.4828	-6.161	-9.48082	-0.00379233
0.48284	19.01	-9.67018	-0.00386807
0.48288	3.868	-9.86008	-0.00394403
0.48292	-4.109	-10.0505	-0.0040202
0.48296	1.556	-10.2414	-0.00409658
0.483	9.995	-10.4329	-0.00417314
0.48304	-9.022	-10.6247	-0.00424989
0.48308	-10.32	-10.817	-0.0043268
0.48312	-24.57	-11.0097	-0.00440386
0.48316	-2.837	-11.2027	-0.00448106
0.4832	-8.675	-11.396	-0.00455839
0.48324	-21.88	-11.5896	-0.00463582
0.48328	-37.03	-11.7834	-0.00471336
0.48332	-15.5	-11.9774	-0.00479097
0.48336	-17.26	-12.1716	-0.00486866
0.4834	-25.87	-12.366	-0.00494641
0.48344	-16.85	-12.5606	-0.00502423
0.48348	-18.65	-12.7552	-0.00510209
0.48352	-16.33	-12.95	-0.00518
0.48356	-47.98	-13.1449	-0.00525796
0.4836	-17.95	-13.3399	-0.00533595
0.48364	-29.95	-13.535	-0.00541399
0.48368	-24.48	-13.7302	-0.00549208
0.48372	-31.13	-13.9255	-0.00557022
0.48376	-15.67	-14.121	-0.00564842
0.4838	4.186	-14.3167	-0.00572668
0.48384	13.43	-14.5126	-0.00580503
0.48388	10.4	-14.7086	-0.00588345
0.48392	4.793	-14.9049	-0.00596197
0.48396	13.72	-15.1014	-0.00604057
0.484	-7.519	-15.2981	-0.00611925
0.48404	-8.242	-15.495	-0.006198
0.48408	-12.11	-15.6921	-0.00627682
0.48412	-26.54	-15.8892	-0.0063557
0.48416	-13.82	-16.0865	-0.00643461
0.4842	-11.65	-16.2839	-0.00651356
0.48424	-19.25	-16.4813	-0.00659253
0.48428	-15.38	-16.6788	-0.0066715
0.48432	-8.097	-16.8762	-0.00675048
0.48436	-15.79	-17.0736	-0.00682945
0.4844	1.295	-17.271	-0.00690839
0.48444	-9.774	-17.4682	-0.00698729
0.48448	15.95	-17.6653	-0.00706614
0.48452	-3.618	-17.8623	-0.00714491
0.48456	-11.51	-18.059	-0.0072236
0.4846	-5.092	-18.2554	-0.00730217
0.48464	-1.335	-18.4515	-0.00738059
0.48468	7.394	-18.6471	-0.00745885
0.48472	-12.35	-18.8423	-0.00753691
0.48476	-14.34	-19.0368	-0.00761473
0.4848	-31.42	-19.2307	-0.00769228
0.48484	-18.73	-19.4238	-0.00776953
0.48488	-19.54	-19.6161	-0.00784644
0.48492	-15.21	-19.8074	-0.00792298
0.48496	-7.144	-19.9978	-0.0079991
0.485	-12.63	-20.187	-0.00807479
0.48504	-4.571	-20.375	-0.00814999
0.48508	-14.86	-20.5617	-0.00822467
0.48512	-0.612	-20.747	-0.00829879
0.48516	17.65	-20.9308	-0.00837231
0.4852	-13.47	-21.113	-0.00844518
0.48524	-0.5253	-21.2934	-0.00851735
0.48528	-0.09178	-21.4719	-0.00858877
0.48532	2.452	-21.6485	-0.00865939
0.48536	-1.566	-21.8228	-0.00872913
0.4854	-14.4	-21.9949	-0.00879795
0.48544	-14.92	-22.1644	-0.00886577
0.48548	13.84	-22.3313	-0.00893252
0.48552	-7.288	-22.4954	-0.00899815
0.48556	-51.8	-22.6564	-0.00906257
0.4856	-73.04	-22.8143	-0.00912571
0.48564	-26.28	-22.9687	-0.0091875
0.48568	-10.81	-23.1197	-0.00924787
0.48572	-26.07	-23.2669	-0.00930676
0.48576	-68.7	-23.4103	-0.0093641
0.4858	-80.32	-23.5496	-0.00941984
0.48584	-64.57	-23.6848	-0.00947391
0.48588	-7.028	-23.8157	-0.00952626
0.48592	-47.09	-23.9421	-0.00957685
0.48596	-33.82	-24.0641	-0.00962564
0.486	-42.26	-24.1815	-0.00967258
0.48604	-12.98	-24.2941	-0.00971764
0.48608	-17	-24.4019	-0.00976077
0.48612	-48.18	-24.5048	-0.00980193
0.48616	-25.32	-24.6027	-0.0098411
0.4862	2.163	-24.6956	-0.00987823
0.48624	-75.23	-24.7832	-0.00991328
0.48628	-82.17	-24.8655	-0.00994622
0.48632	-58.01	-24.9425	-0.00997702
0.48636	-23.91	-25.0141	-0.0100056
0.4864	-28.99	-25.0802	-0.0100321
0.48644	-26.77	-25.1408	-0.0100563
0.48648	-23.3	-25.1959	-0.0100783
0.48652	-41.85	-25.2453	-0.0100981
0.48656	-3.791	-25.2891	-0.0101156
0.4866	-46.68	-25.3272	-0.0101309
0.48664	-25.26	-25.3596	-0.0101438
0.48668	-25.5	-25.3863	-0.0101545
0.48672	-10.87	-25.4071	-0.0101628
0.48676	-60.81	-25.4221	-0.0101688
0.4868	-42.29	-25.4312	-0.0101725
0.48684	-42.63	-25.4344	-0.0101738
0.48688	-53.1	-25.4317	-0.0101727
0.48692	-49.14	-25.4231	-0.0101692
0.48696	-8.762	-25.4085	-0.0101634
0.487	-76.71	-25.388	-0.0101552
0.48704	-48.33	-25.3615	-0.0101446
0.48708	-46.54	-25.3291	-0.0101317
0.48712	-9.138	-25.2909	-0.0101164
0.48716	-14.34	-25.2468	-0.0100987
0.4872	-45.12	-25.1968	-0.0100787
0.48724	-53.85	-25.141	-0.0100564
0.48728	-46.1	-25.0795	-0.0100318
0.48732	0.6019	-25.0123	-0.0100049
0.48736	-35.26	-24.9394	-0.00997576
0.4874	-42.69	-24.8609	-0.00994436
0.48744	-64.11	-24.7768	-0.00991072
0.48748	-31.57	-24.6872	-0.00987488
0.48752	-30.76	-24.5922	-0.00983686
0.48756	19.91	-24.4917	-0.00979669
0.4876	-2.866	-24.386	-0.0097544
0.48764	-18.27	-24.275	-0.00971001
0.48768	-53.96	-24.1589	-0.00966354
0.48772	-37.98	-24.0376	-0.00961502
0.48776	-38.59	-23.9112	-0.00956447
0.4878	-38.59	-23.7798	-0.00951191
0.48784	-19.28	-23.6434	-0.00945737
0.48788	-4.485	-23.5022	-0.00940088
0.48792	-36.45	-23.3562	-0.00934247
0.48796	-18.3	-23.2054	-0.00928217
0.488	-56.1	-23.05	-0.00922001
0.48804	-57.63	-22.89	-0.00915601
0.48808	-0.6987	-22.7255	-0.00909022
0.48812	-34.05	-22.5567	-0.00902266
0.48816	1.151	-22.3834	-0.00895338
0.4882	-39.57	-22.206	-0.0088824
0.48824	-41.94	-22.0244	-0.00880977
0.48828	-40.5	-21.8388	-0.00873552
0.48832	-43.53	-21.6492	-0.00865969
0.48836	-23.24	-21.4558	-0.00858233
0.4884	-22	-21.2587	-0.00850347
0.48844	-15.96	-21.0579	-0.00842317
0.48848	-16.39	-20.8537	-0.00834147
0.48852	-19.72	-20.646	-0.00825841
0.48856	-23.39	-20.4351	-0.00817405
0.4886	-14.6	-20.2211	-0.00808842
0.48864	1.469	-20.0039	-0.00800158
0.48868	10.72	-19.7839	-0.00791356
0.48872	-29.05	-19.561	-0.0078244
0.48876	-50.81	-19.3354	-0.00773414
0.4888	-26.91	-19.1071	-0.00764283
0.48884	-40.87	-18.8763	-0.0075505
0.48888	-35.32	-18.643	-0.0074572
0.48892	-4.543	-18.4074	-0.00736297
0.48896	-2.23	-18.1697	-0.00726787
0.489	-18.65	-17.9298	-0.00717193
0.48904	-22.46	-17.688	-0.00707522
0.48908	-16.51	-17.4444	-0.00697776
0.48912	15.02	-17.199	-0.00687961
0.48916	13.67	-16.952	-0.00678082
0.4892	-0.4386	-16.7035	-0.00668141
0.48924	-1.71	-16.4536	-0.00658144
0.48928	-24.86	-16.2023	-0.00648092
0.48932	5.92	-15.9498	-0.00637991
0.48936	6.44	-15.696	-0.00627841
0.4894	-1.768	-15.4412	-0.00617648
0.48944	-9.976	-15.1853	-0.00607412
0.48948	-12.52	-14.9284	-0.00597136
0.48952	-30.84	-14.6706	-0.00586823
0.48956	14.91	-14.4119	-0.00576476
0.4896	-27.72	-14.1524	-0.00566095
0.48964	13.49	-13.8921	-0.00555683
0.48968	-49.37	-13.6311	-0.00545243
0.48972	-83.27	-13.3694	-0.00534777
0.48976	7.307	-13.1072	-0.00524286
0.4898	-22.98	-12.8444	-0.00513774
0.48984	11.53	-12.5811	-0.00503245
0.48988	-15.87	-12.3175	-0.00492701
0.48992	3.463	-12.0536	-0.00482145
0.48996	-19.31	-11.7895	-0.0047158
0.49	-4.196	-11.5252	-0.00461009
0.49004	-20.61	-11.2609	-0.00450435
0.49008	-6.71	-10.9965	-0.00439861
0.49012	-18.27	-10.7322	-0.00429288
0.49016	-7.433	-10.468	-0.00418721
0.4902	1.353	-10.2041	-0.00408162
0.49024	-1.248	-9.94036	-0.00397614
0.49028	-1.306	-9.67699	-0.0038708
0.49032	-13.68	-9.41403	-0.00376561
0.49036	-12.81	-9.15153	-0.00366061
0.4904	-23.76	-8.88956	-0.00355582
0.49044	4.359	-8.62818	-0.00345127
0.49048	-24.69	-8.36745	-0.00334698
0.49052	-16.59	-8.10745	-0.00324298
0.49056	18.32	-7.84824	-0.0031393
0.4906	-10.55	-7.5899	-0.00303596
0.49064	1.874	-7.33248	-0.00293299
0.49068	-31.04	-7.07606	-0.00283042
0.49072	-4.543	-6.82069	-0.00272828
0.49076	-1.913	-6.56646	-0.00262658
0.4908	9.648	-6.31341	-0.00252537
0.49084	-14.11	-6.06163	-0.00242465
0.49088	7.943	-5.81117	-0.00232447
0.49092	-7.924	-5.5621	-0.00222484
0.49096	11.64	-5.31448	-0.00212579
0.491	1.874	-5.06837	-0.00202735
0.49104	-13.24	-4.82381	-0.00192953
0.49108	17.19	-4.58087	-0.00183235
0.49112	-1.913	-4.33959	-0.00173584
0.49116	14.88	-4.10003	-0.00164001
0.4912	15.2	-3.86221	-0.00154488
0.49124	-3.069	-3.62618	-0.00145047
0.49128	22.54	-3.39198	-0.00135679
0.49132	13.26	-3.15962	-0.00126385
0.49136	-8.04	-2.92913	-0.00117165
0.4914	6.931	-2.70051	-0.00108021
0.49144	0.9198	-2.47379	-0.000989518
0.49148	15.23	-2.24898	-0.000899592
0.49152	3.463	-2.02608	-0.000810431
0.49156	15.69	-1.80509	-0.000722035
0.4916	10.51	-1.58601	-0.000634404
0.49164	-11.77	-1.36884	-0.000547535
0.49168	-11.05	-1.15356	-0.000461425
0.49172	-10.73	-0.940179	-0.000376072
0.49176	5.371	-0.72868	-0.000291472
0.4918	-9.716	-0.519063	-0.000207625
0.49184	4.157	-0.311329	-0.000124532
0.49188	2.018	-0.105476	-4.21905e-05
0.49192	2.423	0.098496	3.93984e-05
0.49196	16.12	0.300589	0.000120236
0.492	-16.57	0.500808	0.000200323
0.49204	22.25	0.699156	0.000279662
0.49208	5.226	0.895641	0.000358256
0.49212	7.48	1.09027	0.000436109
0.49216	17.86	1.28306	0.000513224
0.4922	3.925	1.47402	0.000589609
0.49224	16.58	1.66318	0.000665272
0.49228	4.821	1.85056	0.000740222
0.49232	-16.62	2.03617	0.00081447
0.49236	0.5151	2.22006	0.000888026
0.4924	6.353	2.40225	0.0009609
0.49244	-7.346	2.58275	0.0010331
0.49248	14.36	2.76159	0.00110464
0.49252	16.35	2.9388	0.00117552
0.49256	17.91	3.11439	0.00124575
0.4926	25.08	3.28839	0.00131536
0.49264	-5.149	3.46084	0.00138434
0.49268	-4.282	3.63179	0.00145272
0.49272	3.781	3.80126	0.00152051
0.49276	-0.8143	3.96931	0.00158772
0.4928	-8.04	4.13595	0.00165438
0.49284	-10.47	4.30124	0.00172049
0.49288	-10.61	4.46519	0.00178608
0.49292	12.83	4.62783	0.00185113
0.49296	27.94	4.78919	0.00191568
0.493	19.3	4.94929	0.00197972
0.49304	5.457	5.10816	0.00204326
0.49308	19.56	5.26583	0.00210633
0.49312	51.93	5.42235	0.00216894
0.49316	28.98	5.57775	0.0022311
0.4932	25.83	5.7321	0.00229284
0.49324	20.86	5.88547	0.00235419
0.49328	4.735	6.03794	0.00241518
0.49332	-19.86	6.18958	0.00247583
0.49336	-27.98	6.34048	0.00253619
0.4934	-28.73	6.4907	0.00259628
0.49344	-25.55	6.64031	0.00265612
0.49348	-2.606	6.78935	0.00271574
0.49352	12.77	6.93786	0.00277514
0.49356	3.521	7.08588	0.00283435
0.4936	-0.8143	7.23342	0.00289337
0.49364	20.89	7.38053	0.00295221
0.49368	23.38	7.52723	0.00301089
0.49372	5.688	7.67355	0.00306942
0.49376	19.3	7.81954	0.00312781
0.4938	28.55	7.96522	0.00318609
0.49384	19.24	8.11065	0.00324426
0.49388	-16.25	8.25587	0.00330235
0.49392	-14.54	8.40093	0.00336037
0.49396	-37.26	8.54587	0.00341835
0.494	-23.24	8.69074	0.0034763
0.49404	-17.2	8.83554	0.00353422
0.49408	-15.35	8.98029	0.00359212
0.49412	3.376	9.12498	0.00364999
0.49416	-13.94	9.26959	0.00370784
0.4942	22.71	9.41411	0.00376565
0.49424	4.619	9.55852	0.00382341
0.49428	5.428	9.7028	0.00388112
0.49432	7.48	9.84691	0.00393876
0.49436	4.908	9.99084	0.00399633
0.4944	3.839	10.1346	0.00405382
0.49444	15.02	10.278	0.00411121
0.49448	-0.6698	10.4212	0.00416849
0.49452	-23.15	10.5641	0.00422566
0.49456	-23.18	10.7067	0.00428269
0.4946	-10.38	10.8489	0.00433956
0.49464	-9.6	10.9906	0.00439626
0.49468	2.278	11.1319	0.00445275
0.49472	21.09	11.2725	0.00450901
0.49476	16.06	11.4125	0.00456501
0.4948	26.29	11.5518	0.00462071
0.49484	15.92	11.6902	0.00467609
0.49488	12.02	11.8278	0.00473111
0.49492	8.261	11.9644	0.00478576
0.49496	-5.352	12.1	0.00484
0.495	-17.43	12.2345	0.0048938
0.49504	-1.71	12.3678	0.00494714
0.49508	-2.982	12.4999	0.00499998
0.49512	12.48	12.6307	0.00505228
0.49516	-15.35	12.76	0.005104
0.4952	9.07	12.8878	0.00515511
0.49524	-11.25	13.0139	0.00520556
0.49528	-10.64	13.1383	0.00525531
0.49532	10.2	13.2607	0.0053043
0.49536	13.29	13.3812	0.00535248
0.4954	19.56	13.4995	0.00539981
0.49544	11.18	13.6156	0.00544623
0.49548	10.37	13.7292	0.00549169
0.49552	22.31	13.8403	0.00553613
0.49556	18.23	13.9488	0.00557951
0.4956	0.05273	14.0544	0.00562177
0.49564	-13.24	14.1571	0.00566285
0.49568	4.908	14.2568	0.00570272
0.49572	59.13	14.3533	0.0057413
0.49576	54.1	14.4464	0.00577855
0.4958	30.2	14.536	0.00581441
0.49584	-0.2363	14.6221	0.00584883
0.49588	8.376	14.7045	0.00588178
0.49592	35.86	14.783	0.0059132
0.49596	-3.907	14.8576	0.00594306
0.496	17.25	14.9282	0.0059713
0.49604	76.58	14.9947	0.00599788
0.49608	65.95	15.0569	0.00602276
0.49612	13.9	15.1148	0.0060459
0.49616	32.74	15.1682	0.00606728
0.4962	43.2	15.2172	0.00608686
0.49624	14.65	15.2616	0.00610463
0.49628	34.07	15.3014	0.00612055
0.49632	48.17	15.3365	0.00613462
0.49636	72.57	15.367	0.0061468
0.4964	21.3	15.3928	0.0061571
0.49644	23.14	15.4138	0.00616551
0.49648	23.98	15.43	0.00617202
0.49652	9.041	15.4416	0.00617663
0.49656	30.63	15.4484	0.00617934
0.4966	20.51	15.4504	0.00618016
0.49664	8.694	15.4477	0.00617908
0.49668	35.17	15.4403	0.0061761
0.49672	39.82	15.4281	0.00617124
0.49676	57.59	15.4112	0.00616448
0.4968	24.76	15.3896	0.00615585
0.49684	29.39	15.3634	0.00614536
0.49688	16.93	15.3325	0.00613302
0.49692	23.26	15.2971	0.00611885
0.49696	27.57	15.2572	0.00610287
0.497	26.5	15.2128	0.0060851
0.49704	18.78	15.1639	0.00606557
0.49708	8.607	15.1107	0.00604429
0.49712	22.62	15.0533	0.0060213
0.49716	25.86	14.9915	0.00599661
0.4972	26.24	14.9256	0.00597026
0.49724	18.38	14.8557	0.00594226
0.49728	6.295	14.7816	0.00591265
0.49732	13.87	14.7036	0.00588146
0.49736	26.32	14.6218	0.0058487
0.4974	30.46	14.5361	0.00581442
0.49744	21.38	14.4466	0.00577864
0.49748	20.02	14.3535	0.0057414
0.49752	10.86	14.2568	0.00570271
0.49756	1.758	14.1566	0.00566263
0.4976	9.417	14.053	0.00562118
0.49764	14.56	13.946	0.00557839
0.49768	32.94	13.8358	0.0055343
0.49772	19.1	13.7223	0.00548894
0.49776	4.243	13.6058	0.00544233
0.4978	-7.808	13.4863	0.00539452
0.49784	1.556	13.3638	0.00534554
0.49788	10.98	13.2385	0.00529541
0.49792	25.63	13.1104	0.00524417
0.49796	8.781	12.9796	0.00519184
0.498	38.43	12.8461	0.00513845
0.49804	15.86	12.7101	0.00508404
0.49808	16.64	12.5716	0.00502864
0.49812	19.91	12.4307	0.00497227
0.49816	-12.29	12.2874	0.00491497
0.4982	29.65	12.142	0.00485678
0.49824	-8.82	11.9943	0.00479774
0.49828	26.82	11.8447	0.00473786
0.49832	1.7	11.693	0.00467719
0.49836	36.87	11.5394	0.00461576
0.4984	18.67	11.384	0.0045536
0.49844	13.06	11.2269	0.00449074
0.49848	8.636	11.0681	0.00442723
0.49852	-6.103	10.9077	0.0043631
0.49856	16.18	10.746	0.00429838
0.4986	-12.43	10.5828	0.00423311
0.49864	-8.907	10.4183	0.00416733
0.49868	-3.358	10.2527	0.00410106
0.49872	-2.433	10.0859	0.00403434
0.49876	31.18	9.91797	0.00396719
0.4988	-15.38	9.74908	0.00389963
0.49884	8.723	9.57924	0.0038317
0.49888	22.97	9.40852	0.00376341
0.49892	18.95	9.23697	0.00369479
0.49896	7.423	9.06466	0.00362586
0.499	-1.595	8.89166	0.00355666
0.49904	15.51	8.71803	0.00348721
0.49908	7.827	8.54383	0.00341753
0.49912	3.665	8.36913	0.00334765
0.49916	-23.5	8.194	0.0032776
0.4992	-10.96	8.01849	0.0032074
0.49924	1.7	7.84265	0.00313706
0.49928	-9.6	7.66654	0.00306662
0.49932	5.746	7.49018	0.00299607
0.49936	-3.04	7.31362	0.00292545
0.4994	33.95	7.13689	0.00285476
0.49944	9.128	6.96002	0.00278401
0.49948	10.31	6.78305	0.00271322
0.49952	0.6886	6.60602	0.00264241
0.49956	-4.254	6.42897	0.00257159
0.4996	18.55	6.25194	0.00250077
0.49964	6.7	6.07496	0.00242998
0.49968	-1.797	5.89808	0.00235923
0.49972	10.14	5.72133	0.00228853
0.49976	9.764	5.54475	0.0022179
0.4998	9.821	5.36839	0.00214736
0.49984	-3.993	5.19228	0.00207691
0.49988	3.665	5.01647	0.00200659
0.49992	8.405	4.84099	0.00193639
0.49996	-12.09	4.66588	0.00186635
0.5	-4.658	4.49118	0.00179647
0.50004	-6.595	4.31692	0.00172677
0.50008	0.3706	4.14313	0.00165725
0.50012	14.56	3.96985	0.00158794
0.50016	-15.24	3.79709	0.00151883
0.5002	3.145	3.62487	0.00144995
0.50024	-22.72	3.45323	0.00138129
0.50028	-5.843	3.28217	0.00131287
0.50032	18.9	3.11171	0.00124468
0.50036	15.17	2.94186	0.00117674
0.5004	0.1394	2.77263	0.00110905
0.50044	3.781	2.60404	0.00104162
0.50048	5.226	2.4361	0.00097444
0.50052	3.665	2.26883	0.000907531
0.50056	-9.6	2.10224	0.000840896
0.5006	-10.12	1.93636	0.000774542
0.50064	4.908	1.77119	0.000708475
0.50068	-7.751	1.60674	0.000642698
0.50072	-5.005	1.44304	0.000577214
0.50076	-8.733	1.28007	0.000512027
0.5008	18.72	1.11785	0.000447138
0.50084	2.625	0.956371	0.000382548
0.50088	-10.84	0.795649	0.00031826
0.50092	-24.02	0.635684	0.000254274
0.50096	-9.86	0.476478	0.000190591
0.501	10.92	0.318024	0.00012721
0.50104	-7.115	0.160316	6.41265e-05
0.50108	-20.84	0.00334328	1.33731e-06
0.50112	-8.386	-0.152906	-6.11625e-05
0.50116	3.636	-0.308449	-0.00012338
0.5012	1.816	-0.463304	-0.000185322
0.50124	-13.33	-0.617492	-0.000246997
0.50128	-15.84	-0.771034	-0.000308414
0.50132	9.041	-0.923955	-0.000369582
0.50136	-3.936	-1.07628	-0.000430512
0.5014	-16.22	-1.22804	-0.000491216
0.50144	-33.21	-1.37926	-0.000551705
0.50148	-28.82	-1.52998	-0.000611993
0.50152	-9.774	-1.68025	-0.000672099
0.50156	-1.826	-1.83011	-0.000732045
0.5016	-9.918	-1.97963	-0.000791853
0.50164	-15.76	-2.12887	-0.000851548
0.50168	11.96	-2.27789	-0.000911155
0.50172	-8.444	-2.42675	-0.000970702
0.50176	-0.2941	-2.57553	-0.00103021
0.5018	-7.751	-2.72429	-0.00108971
0.50184	-8.126	-2.87308	-0.00114923
0.50188	3.521	-3.02199	-0.0012088
0.50192	-9.167	-3.17107	-0.00126843
0.50196	-6.103	-3.32039	-0.00132816
0.502	-5.063	-3.47003	-0.00138801
0.50204	6.209	-3.62005	-0.00144802
0.50208	-8.011	-3.77051	-0.00150821
0.50212	-7.462	-3.9215	-0.0015686
0.50216	-14.69	-4.07307	-0.00162923
0.5022	10.46	-4.22529	-0.00169012
0.50224	20.75	-4.37825	-0.0017513
0.50228	6.209	-4.53199	-0.0018128
0.50232	7.105	-4.68658	-0.00187463
0.50236	-23.21	-4.84208	-0.00193683
0.5024	-9.976	-4.99854	-0.00199941
0.50244	-6.855	-5.15601	-0.0020624
0.50248	2.163	-5.31454	-0.00212582
0.50252	5.197	-5.47421	-0.00218968
0.50256	0.6597	-5.63506	-0.00225402
0.5026	0.4862	-5.79714	-0.00231886
0.50264	-4.514	-5.96051	-0.0023842
0.50268	19.82	-6.1252	-0.00245008
0.50272	-3.733	-6.29127	-0.00251651
0.50276	3.983	-6.45875	-0.0025835
0.5028	-9.947	-6.62767	-0.00265107
0.50284	-11.83	-6.79807	-0.00271923
0.50288	-14.28	-6.96999	-0.00278799
0.50292	-17.11	-7.14344	-0.00285738
0.50296	-10.06	-7.31848	-0.00292739
0.503	-6.566	-7.49513	-0.00299805
0.50304	15.54	-7.67345	-0.00306938
0.50308	-6.45	-7.85347	-0.00314139
0.50312	-14.05	-8.03521	-0.00321409
0.50316	17.13	-8.21873	-0.00328749
0.5032	-0.03397	-8.40404	-0.00336162
0.50324	-8.675	-8.59117	-0.00343647
0.50328	-19.31	-8.78015	-0.00351206
0.50332	-6.363	-8.97099	-0.0035884
0.50336	-6.219	-9.16373	-0.00366549
0.5034	0.3128	-9.35837	-0.00374335
0.50344	5.631	-9.55495	-0.00382198
0.50348	-10.53	-9.75347	-0.00390139
0.50352	5.544	-9.95397	-0.00398159
0.50356	10.31	-10.1564	-0.00406257
0.5036	3.203	-10.3609	-0.00414435
0.50364	4.359	-10.5673	-0.00422693
0.50368	9.619	-10.7757	-0.00431029
0.50372	1.989	-10.9861	-0.00439443
0.50376	-3.56	-11.1984	-0.00447936
0.5038	-1.479	-11.4126	-0.00456504
0.50384	-9.485	-11.6287	-0.00465149
0.50388	-5.381	-11.8467	-0.00473867
0.50392	-0.8432	-12.0665	-0.00482658
0.50396	-27.52	-12.288	-0.00491521
0.504	-2.895	-12.5113	-0.00500453
0.50404	0.3995	-12.7363	-0.00509453
0.50408	-16.31	-12.963	-0.0051852
0.50412	-1.421	-13.1913	-0.00527652
0.50416	9.735	-13.4212	-0.00536847
0.5042	-16.48	-13.6526	-0.00546104
0.50424	-23.99	-13.8855	-0.00555419
0.50428	-19.77	-14.1198	-0.00564792
0.50432	-11.65	-14.3555	-0.00574219
0.50436	-17.61	-14.5925	-0.00583699
0.5044	-22.75	-14.8307	-0.0059323
0.50444	-9.138	-15.0702	-0.00602809
0.50448	-5.699	-15.3109	-0.00612436
0.50452	5.082	-15.5527	-0.00622107
0.50456	-3.473	-15.7955	-0.00631822
0.5046	8.174	-16.0394	-0.00641577
0.50464	9.417	-16.2842	-0.00651369
0.50468	4.012	-16.5299	-0.00661196
0.50472	-6.768	-16.7764	-0.00671055
0.50476	6.498	-17.0235	-0.00680941
0.5048	-6.161	-17.2713	-0.00690851
0.50484	-23.73	-17.5195	-0.00700781
0.50488	-5.583	-17.7681	-0.00710725
0.50492	-9.138	-18.017	-0.00720681
0.50496	-11.42	-18.2661	-0.00730642
0.505	-0.9588	-18.5151	-0.00740605
0.50504	6.122	-18.7641	-0.00750564
0.50508	24.1	-19.0129	-0.00760515
0.50512	17.62	-19.2613	-0.00770452
0.50516	5.949	-19.5092	-0.00780369
0.5052	0.7753	-19.7565	-0.00790258
0.50524	8.896	-20.0028	-0.00800113
0.50528	0.1972	-20.2482	-0.00809927
0.50532	-14.77	-20.4923	-0.00819692
0.50536	-5.41	-20.735	-0.00829398
0.5054	-9.86	-20.976	-0.00839039
0.50544	-10.15	-21.2151	-0.00848604
0.50548	-22.46	-21.4522	-0.00858087
0.50552	-23.88	-21.6869	-0.00867477
0.50556	-79.71	-21.9191	-0.00876765
0.5056	-30.84	-22.1486	-0.00885944
0.50564	12.13	-22.3751	-0.00895005
0.50568	-37	-22.5985	-0.00903939
0.50572	-50.78	-22.8185	-0.00912739
0.50576	-32.2	-23.0349	-0.00921397
0.5058	-20.32	-23.2476	-0.00929904
0.50584	-40.26	-23.4563	-0.00938253
0.50588	-86.65	-23.6609	-0.00946437
0.50592	-68.36	-23.8612	-0.00954448
0.50596	-21.16	-24.057	-0.0096228
0.506	-33.04	-24.2482	-0.00969927
0.50604	-24.66	-24.4346	-0.00977384
0.50608	-48.47	-24.6161	-0.00984644
0.50612	-86.59	-24.7926	-0.00991703
0.50616	-28.44	-24.9639	-0.00998556
0.5062	1.18	-25.1299	-0.010052
0.50624	-12.72	-25.2906	-0.0101162
0.50628	-52.43	-25.4457	-0.0101783
0.50632	-47.52	-25.5953	-0.0102381
0.50636	-22.09	-25.7391	-0.0102956
0.5064	-35.29	-25.8771	-0.0103508
0.50644	-59.97	-26.0092	-0.0104037
0.50648	-102.1	-26.1352	-0.0104541
0.50652	-36.48	-26.2552	-0.0105021
0.50656	-55.9	-26.3691	-0.0105476
0.5066	-67.37	-26.4767	-0.0105907
0.50664	-58.3	-26.5781	-0.0106312
0.50668	-25.26	-26.6733	-0.0106693
0.50672	-2.404	-26.7622	-0.0107049
0.50676	-48.3	-26.8448	-0.0107379
0.5068	-54.98	-26.9211	-0.0107684
0.50684	-9.253	-26.9911	-0.0107964
0.50688	-14.43	-27.0548	-0.0108219
0.50692	-52.43	-27.1122	-0.0108449
0.50696	-25.15	-27.1632	-0.0108653
0.507	-54.95	-27.208	-0.0108832
0.50704	-23.85	-27.2464	-0.0108986
0.50708	-30.06	-27.2785	-0.0109114
0.50712	-32.23	-27.3043	-0.0109217
0.50716	-25.24	-27.3239	-0.0109295
0.5072	-51.33	-27.3371	-0.0109348
0.50724	-10.26	-27.3441	-0.0109376
0.50728	-30.9	-27.3448	-0.0109379
0.50732	0.3417	-27.3392	-0.0109357
0.50736	-48.59	-27.3275	-0.010931
0.5074	5.197	-27.3095	-0.0109238
0.50744	-7.664	-27.2853	-0.0109141
0.50748	-45.84	-27.2549	-0.0109019
0.50752	-47.4	-27.2182	-0.0108873
0.50756	-34.72	-27.1754	-0.0108701
0.5076	-32.66	-27.1263	-0.0108505
0.50764	2.538	-27.071	-0.0108284
0.50768	-64.34	-27.0096	-0.0108038
0.50772	-73.93	-26.9419	-0.0107768
0.50776	-36.68	-26.8681	-0.0107472
0.5078	-75.64	-26.7881	-0.0107153
0.50784	-12.72	-26.7021	-0.0106808
0.50788	-40.5	-26.61	-0.010644
0.50792	-31.07	-26.5119	-0.0106047
0.50796	-57.52	-26.4078	-0.0105631
0.508	-52.14	-26.2979	-0.0105192
0.50804	-41.04	-26.1822	-0.0104729
0.50808	-38.91	-26.0607	-0.0104243
0.50812	-29.43	-25.9337	-0.0103735
0.50816	-23.53	-25.801	-0.0103204
0.5082	-49.83	-25.6629	-0.0102652
0.50824	-21.65	-25.5195	-0.0102078
0.50828	-19.11	-25.3708	-0.0101483
0.50832	-11.94	-25.217	-0.0100868
0.50836	-21.05	-25.058	-0.0100232
0.5084	-58.04	-24.8942	-0.00995767
0.50844	-23.21	-24.7254	-0.00989017
0.50848	-40.55	-24.5519	-0.00982077
0.50852	-19.8	-24.3738	-0.0097495
0.50856	-12.29	-24.191	-0.00967641
0.5086	-20.32	-24.0039	-0.00960155
0.50864	-38.07	-23.8124	-0.00952495
0.50868	-38.56	-23.6167	-0.00944666
0.50872	-22.09	-23.4168	-0.00936672
0.50876	-10.84	-23.2129	-0.00928518
0.5088	-3.097	-23.0052	-0.00920207
0.50884	-6.248	-22.7936	-0.00911745
0.50888	-33.44	-22.5784	-0.00903136
0.50892	-23.56	-22.3596	-0.00894382
0.50896	-12.49	-22.1372	-0.00885489
0.509	-8.3	-21.9115	-0.00876461
0.50904	-30.93	-21.6825	-0.008673
0.50908	-44.57	-21.4503	-0.00858011
0.50912	-9.34	-21.2149	-0.00848598
0.50916	-31.25	-20.9766	-0.00839064
0.5092	-12.14	-20.7353	-0.00829414
0.50924	-23.73	-20.4913	-0.00819651
0.50928	-3.502	-20.2445	-0.0080978
0.50932	-1.479	-19.9951	-0.00799804
0.50936	9.966	-19.7432	-0.00789728
0.5094	17.39	-19.4888	-0.00779554
0.50944	-13.07	-19.2321	-0.00769285
0.50948	-0.4964	-18.9731	-0.00758924
0.50952	-53.73	-18.7119	-0.00748474
0.50956	-30.09	-18.4484	-0.00737937
0.5096	-36.68	-18.1829	-0.00727314
0.50964	-24.28	-17.9152	-0.00716609
0.50968	-27	-17.6456	-0.00705825
0.50972	-29.95	-17.3741	-0.00694965
0.50976	-27.61	-17.1008	-0.00684033
0.5098	-10.47	-16.8258	-0.00673031
0.50984	1.006	-16.5491	-0.00661963
0.50988	11.61	-16.2708	-0.00650832
0.50992	6.787	-15.9911	-0.00639643
0.50996	14.68	-15.7099	-0.00628397
0.51	-3.3	-15.4274	-0.00617098
0.51004	-6.855	-15.1437	-0.00605746
0.51008	-9.774	-14.8586	-0.00594345
0.51012	-20.03	-14.5724	-0.00582896
0.51016	-27.43	-14.285	-0.00571399
0.5102	-9.138	-13.9965	-0.00559858
0.51024	-25	-13.7069	-0.00548274
0.51028	-48.93	-13.4162	-0.00536649
0.51032	-25.09	-13.1246	-0.00524984
0.51036	-38.1	-12.8321	-0.00513283
0.5104	-7.779	-12.5387	-0.00501547
0.51044	-29.6	-12.2445	-0.00489781
0.51048	-4.571	-11.9497	-0.00477987
0.51052	-13.21	-11.6542	-0.00466168
0.51056	-0.7276	-11.3582	-0.00454328
0.5106	-29.4	-11.0617	-0.00442469
0.51064	-29.34	-10.7649	-0.00430596
0.51068	-9.109	-10.4678	-0.00418711
0.51072	-3.791	-10.1704	-0.00406817
0.51076	-27.32	-9.87299	-0.0039492
0.5108	-19.51	-9.57553	-0.00383021
0.51084	2.943	-9.27815	-0.00371126
0.51088	4.301	-8.98093	-0.00359237
0.51092	-9.831	-8.68397	-0.00347359
0.51096	4.446	-8.38737	-0.00335495
0.511	4.59	-8.09122	-0.00323649
0.51104	8.983	-7.79559	-0.00311823
0.51108	4.388	-7.50056	-0.00300022
0.51112	4.504	-7.20621	-0.00288248
0.51116	-7.664	-6.91261	-0.00276504
0.5112	18.14	-6.61982	-0.00264793
0.51124	3.145	-6.3279	-0.00253116
0.51128	-18.85	-6.03691	-0.00241477
0.51132	1.931	-5.7469	-0.00229876
0.51136	-23.04	-5.45793	-0.00218317
0.5114	-2.895	-5.17004	-0.00206802
0.51144	26.27	-4.8833	-0.00195332
0.51148	5.833	-4.59775	-0.0018391
0.51152	-6.277	-4.31345	-0.00172538
0.51156	-5.178	-4.03044	-0.00161218
0.5116	1.902	-3.74877	-0.00149951
0.51164	-13.1	-3.46846	-0.00138739
0.51168	5.804	-3.18958	-0.00127583
0.51172	-13.96	-2.91215	-0.00116486
0.51176	-0.612	-2.63623	-0.00105449
0.5118	-5.149	-2.36185	-0.000944738
0.51184	-10.64	-2.08906	-0.000835622
0.51188	1.787	-1.8179	-0.000727161
0.51192	4.301	-1.54843	-0.000619373
0.51196	-18.82	-1.28069	-0.000512277
0.512	-6.739	-1.01473	-0.000405892
0.51204	5.66	-0.750599	-0.00030024
0.51208	26.41	-0.488348	-0.000195339
0.51212	3.723	-0.228028	-9.12112e-05
0.51216	-7.982	0.0303185	1.21274e-05
0.5122	-9.6	0.286649	0.000114659
0.51224	17.77	0.54092	0.000216368
0.51228	8.607	0.793091	0.000317236
0.51232	19.3	1.04312	0.000417248
0.51236	19.33	1.29097	0.000516388
0.5124	7.134	1.53662	0.000614647
0.51244	26.01	1.78003	0.000712013
0.51248	19.97	2.0212	0.00080848
0.51252	11.82	2.26011	0.000904044
0.51256	21.18	2.49676	0.000998703
0.5126	16.18	2.73115	0.00109246
0.51264	22.08	2.96328	0.00118531
0.51268	10.63	3.19317	0.00127727
0.51272	8.087	3.42085	0.00136834
0.51276	8.261	3.64633	0.00145853
0.5128	-1.45	3.86964	0.00154786
0.51284	11.06	4.09081	0.00163632
0.51288	12.51	4.30986	0.00172394
0.51292	12.16	4.52682	0.00181073
0.51296	5.833	4.74173	0.00189669
0.513	-3.126	4.95462	0.00198185
0.51304	14.16	5.16552	0.00206621
0.51308	14.1	5.37447	0.00214979
0.51312	-8.907	5.5815	0.0022326
0.51316	-9.253	5.78665	0.00231466
0.5132	-1.884	5.98994	0.00239598
0.51324	17.19	6.19142	0.00247657
0.51328	-2.028	6.39111	0.00255644
0.51332	1.382	6.58903	0.00263561
0.51336	-9.889	6.7852	0.00271408
0.5134	16.64	6.97966	0.00279186
0.51344	-10	7.17242	0.00286897
0.51348	12.62	7.36349	0.0029454
0.51352	3.463	7.5529	0.00302116
0.51356	0.862	7.74065	0.00309626
0.5136	10.34	7.92677	0.00317071
0.51364	-0.3808	8.11126	0.0032445
0.51368	29.24	8.29413	0.00331765
0.51372	35.08	8.4754	0.00339016
0.51376	-13.53	8.65509	0.00346204
0.5138	5.139	8.83322	0.00353329
0.51384	9.619	9.00981	0.00360392
0.51388	0.3128	9.18487	0.00367395
0.51392	-8.849	9.35842	0.00374337
0.51396	19.53	9.53048	0.00381219
0.514	19.82	9.70105	0.00388042
0.51404	3.463	9.87015	0.00394806
0.51408	8.492	10.0378	0.00401512
0.51412	-6.768	10.204	0.0040816
0.51416	21.35	10.3688	0.0041475
0.5142	-1.566	10.5321	0.00421283
0.51424	13.64	10.694	0.00427759
0.51428	2.365	10.8545	0.00434179
0.51432	-16.85	11.0136	0.00440542
0.51436	13.61	11.1712	0.00446849
0.5144	-10.87	11.3275	0.00453099
0.51444	8.001	11.4823	0.00459292
0.51448	7.307	11.6357	0.00465427
0.51452	3.376	11.7876	0.00471503
0.51456	25.34	11.938	0.00477521
0.5146	10.02	12.087	0.00483478
0.51464	21.38	12.2344	0.00489375
0.51468	-9.571	12.3803	0.0049521
0.51472	1.209	12.5246	0.00500983
0.51476	-13.1	12.6673	0.00506693
0.5148	-9.6	12.8085	0.00512338
0.51484	10.25	12.9479	0.00517918
0.51488	-0.6987	13.0857	0.00523429
0.51492	24.65	13.2218	0.00528871
0.51496	-4.629	13.356	0.00534241
0.515	-16.85	13.4884	0.00539538
0.51504	16.3	13.6189	0.00544758
0.51508	-3.213	13.7475	0.00549899
0.51512	-7.982	13.874	0.00554959
0.51516	0.8909	13.9984	0.00559934
0.5152	4.07	14.1205	0.00564821
0.51524	8.405	14.2404	0.00569617
0.51528	-5.699	14.3579	0.00574318
0.51532	6.931	14.473	0.0057892
0.51536	-2.982	14.5855	0.00583419
0.5154	-3.473	14.6953	0.0058781
0.51544	-2.953	14.8022	0.0059209
0.51548	7.856	14.9063	0.00596253
0.51552	4.272	15.0074	0.00600294
0.51556	22.31	15.1052	0.00604209
0.5156	22.83	15.1998	0.00607992
0.51564	6.613	15.2909	0.00611637
0.51568	43.09	15.3785	0.0061514
0.51572	40.49	15.4624	0.00618495
0.51576	23.52	15.5424	0.00621698
0.5158	42.97	15.6186	0.00624744
0.51584	39.82	15.6907	0.00627628
0.51588	24.65	15.7587	0.00630348
0.51592	51.09	15.8225	0.00632899
0.51596	47.13	15.882	0.00635278
0.516	19.59	15.9371	0.00637483
0.51604	-2.953	15.9878	0.00639511
0.51608	32.39	16.034	0.00641359
0.51612	45.34	16.0757	0.00643026
0.51616	71.76	16.1127	0.00644509
0.5162	22.86	16.1452	0.00645806
0.51624	-0.5542	16.1729	0.00646917
0.51628	33.14	16.196	0.0064784
0.51632	32.19	16.2144	0.00648575
0.51636	93.63	16.228	0.0064912
0.5164	36.03	16.2369	0.00649476
0.51644	8.781	16.2411	0.00649642
0.51648	38.06	16.2405	0.00649621
0.51652	37.19	16.2353	0.00649412
0.51656	6.902	16.2254	0.00649018
0.5166	-7.635	16.211	0.00648438
0.51664	44.1	16.1919	0.00647676
0.51668	60.2	16.1683	0.00646732
0.51672	20.28	16.1402	0.00645607
0.51676	25.69	16.1076	0.00644304
0.5168	31.87	16.0706	0.00642825
0.51684	22.22	16.0293	0.00641173
0.51688	2.423	15.9837	0.0063935
[truncated: 23,003 more rows]

## Sheet: Sheet2
0.53232	-14.51	3.57368	0.00142947
0.53236	-5.612	7.40242	0.00296097
0.5324	-9.542	11.3546	0.00454184
0.53244	-16.59	15.4324	0.00617295
0.53248	15.2	19.6379	0.00785516
0.53252	12.91	23.9733	0.00958932
0.53256	20.43	28.4407	0.0113763
0.5326	13.35	33.0422	0.0132169
0.53264	-3.993	37.78	0.015112
0.53268	13.23	42.6561	0.0170624
0.53272	1.064	47.6727	0.0190691
0.53276	-17	52.8318	0.0211327
0.5328	-7.722	58.1356	0.0232542
0.53284	12.48	63.5859	0.0254344
0.53288	12.28	69.185	0.027674
0.53292	12.68	74.9346	0.0299739
0.53296	1.006	80.8369	0.0323348
0.533	9.417	86.8938	0.0347575
0.53304	-9.918	93.1071	0.0372428
0.53308	-14.57	99.4787	0.0397915
0.53312	3.839	106.011	0.0424042
0.53316	23.32	112.704	0.0450818
0.5332	35.98	119.562	0.0478248
0.53324	22.36	126.585	0.050634
0.53328	35.92	133.775	0.0535101
0.53332	8.607	141.134	0.0564537
0.53336	5.11	148.663	0.0594654
0.5334	6.353	156.365	0.0625459
0.53344	-3.155	164.239	0.0656958
0.53348	-0.8721	172.289	0.0689156
0.53352	-10.44	180.515	0.0722059
0.53356	-0.7854	188.918	0.0755672
0.5336	-8.936	197.5	0.079
0.53364	3.694	206.262	0.0825048
0.53368	-14.43	215.205	0.086082
0.53372	-2.577	224.33	0.0897319
0.53376	-2.519	233.637	0.0934549
0.5338	53.29	243.129	0.0972514
0.53384	36.93	252.804	0.101122
0.53388	46.84	262.665	0.105066
0.53392	47.02	272.711	0.109084
0.53396	60.54	282.943	0.113177
0.534	78.4	293.361	0.117344
0.53404	46.38	303.966	0.121586
0.53408	68.64	314.758	0.125903
0.53412	64.96	325.736	0.130295
0.53416	71.12	336.902	0.134761
0.5342	53.84	348.254	0.139302
0.53424	60.08	359.793	0.143917
0.53428	70.8	371.518	0.148607
0.53432	71.41	383.429	0.153372
0.53436	113.1	395.525	0.15821
0.5344	138.3	407.806	0.163122
0.53444	199.8	420.27	0.168108
0.53448	274.2	432.917	0.173167
0.53452	314.2	445.746	0.178298
0.53456	331.6	458.755	0.183502
0.5346	312.8	471.944	0.188778
0.53464	276.6	485.312	0.194125
0.53468	246.3	498.857	0.199543
0.53472	193.1	512.577	0.205031
0.53476	176.2	526.472	0.210589
0.5348	139.2	540.54	0.216216
0.53484	104.2	554.779	0.221912
0.53488	87.02	569.187	0.227675
0.53492	97.8	583.763	0.233505
0.53496	161.3	598.503	0.239401
0.535	234.4	613.406	0.245363
0.53504	333.7	628.47	0.251388
0.53508	453	643.69	0.257476
0.53512	516.9	659.065	0.263626
0.53516	536.9	674.592	0.269837
0.5352	449.3	690.267	0.276107
0.53524	292.2	706.088	0.282435
0.53528	190	722.051	0.28882
0.53532	123.3	738.153	0.295261
0.53536	59.04	754.391	0.301756
0.5354	110.3	770.76	0.308304
0.53544	187.6	787.257	0.314903
0.53548	171.8	803.877	0.321551
0.53552	164.5	820.616	0.328246
0.53556	256.1	837.469	0.334988
0.5356	349.4	854.431	0.341773
0.53564	351.2	871.497	0.348599
0.53568	440.6	888.661	0.355464
0.53572	506.8	905.918	0.362367
0.53576	560.6	923.261	0.369304
0.5358	475.9	940.684	0.376274
0.53584	398.3	958.182	0.383273
0.53588	300.9	975.749	0.390299
0.53592	431.8	993.376	0.39735
0.53596	397.5	1011.06	0.404423
0.536	253.2	1028.79	0.411515
0.53604	265	1046.56	0.418623
0.53608	520.1	1064.36	0.425744
0.53612	565.3	1082.19	0.432874
0.53616	147.3	1100.03	0.440012
0.5362	464.7	1117.88	0.447152
0.53624	452.6	1135.73	0.454292
0.53628	208.8	1153.57	0.461428
0.53632	397.3	1171.39	0.468557
0.53636	613.5	1189.18	0.475674
0.5364	750.8	1206.94	0.482775
0.53644	767.8	1224.64	0.489857
0.53648	846.5	1242.29	0.496916
0.53652	640.6	1259.86	0.503946
0.53656	301.2	1277.36	0.510944
0.5366	398.8	1294.76	0.517906
0.53664	298.6	1312.06	0.524826
0.53668	118.1	1329.25	0.5317
0.53672	320.3	1346.31	0.538524
0.53676	514.3	1363.23	0.545292
0.5368	408.3	1380	0.551998
0.53684	435.6	1396.6	0.558639
0.53688	601.9	1413.02	0.565208
0.53692	2446	1429.25	0.571699
0.53696	4396	1445.27	0.578107
0.537	5926	1461.07	0.584426
0.53704	8100	1476.63	0.590652
0.53708	9286	1491.95	0.59678
0.53712	10150	1507.02	0.602807
0.53716	9905	1521.83	0.608731
0.5372	8810	1536.38	0.614551
0.53724	8288	1550.67	0.620267
0.53728	6908	1564.7	0.625881
0.53732	5534	1578.49	0.631397
0.53736	4758	1592.04	0.636816
0.5374	3767	1605.36	0.642145
0.53744	2892	1618.47	0.647387
0.53748	1760	1631.37	0.652548
0.53752	698.2	1644.08	0.657632
0.53756	565.6	1656.61	0.662645
0.5376	418.4	1668.98	0.667593
0.53764	364.8	1681.2	0.67248
0.53768	547.7	1693.28	0.677312
0.53772	994.3	1705.23	0.682092
0.53776	1114	1717.06	0.686825
0.5378	817.5	1728.79	0.691517
0.53784	879.6	1740.43	0.69617
0.53788	918.9	1751.97	0.700789
0.53792	570.4	1763.45	0.705379
0.53796	490.8	1774.85	0.709942
0.538	749.2	1786.21	0.714483
0.53804	887.3	1797.51	0.719004
0.53808	228.8	1808.78	0.72351
0.53812	-391.6	1820.01	0.728003
0.53816	-319.4	1831.22	0.732486
0.5382	-669.3	1842.41	0.736962
0.53824	-787.1	1853.58	0.741433
0.53828	-296	1864.75	0.7459
0.53832	93.03	1875.91	0.750366
0.53836	382.3	1887.07	0.75483
0.5384	679.4	1898.23	0.759294
0.53844	812.6	1909.4	0.763758
0.53848	1039	1920.56	0.768223
0.53852	1131	1931.72	0.772689
0.53856	1026	1942.89	0.777155
0.5386	1155	1954.05	0.781622
0.53864	1016	1965.22	0.786089
0.53868	814.8	1976.39	0.790556
0.53872	671.3	1987.56	0.795022
0.53876	1267	1998.72	0.799487
0.5388	1934	2009.87	0.803949
0.53884	2830	2021.02	0.808408
0.53888	4258	2032.15	0.812862
0.53892	5215	2043.28	0.817311
0.53896	5883	2054.38	0.821753
0.539	5759	2065.48	0.82619
0.53904	5014	2076.55	0.830622
0.53908	4416	2087.62	0.835049
0.53912	3539	2098.68	0.839473
0.53916	2817	2109.74	0.843895
0.5392	2249	2120.8	0.848319
0.53924	1643	2131.87	0.852746
0.53928	1184	2142.95	0.857179
0.53932	340.8	2154.05	0.861619
0.53936	-150.8	2165.17	0.866069
0.5394	-253.6	2176.33	0.870531
0.53944	-217.1	2187.51	0.875005
0.53948	117.6	2198.73	0.879493
0.53952	544.1	2209.99	0.883996
0.53956	916.8	2221.28	0.888513
0.5396	1287	2232.61	0.893045
0.53964	1883	2243.98	0.897592
0.53968	2718	2255.38	0.902154
0.53972	3525	2266.82	0.906729
0.53976	4195	2278.3	0.911319
0.5398	5033	2289.8	0.915922
0.53984	5599	2301.35	0.920539
0.53988	5535	2312.93	0.925172
0.53992	5080	2324.55	0.92982
0.53996	4483	2336.21	0.934486
0.54	3677	2347.93	0.939171
0.54004	2752	2359.7	0.943879
0.54008	2025	2371.53	0.948611
0.54012	1267	2383.43	0.95337
0.54016	359.5	2395.4	0.95816
0.5402	-334.7	2407.45	0.962982
0.54024	-644	2419.59	0.967838
0.54028	-670.7	2431.83	0.97273
0.54032	-561.6	2444.15	0.97766
0.54036	-99.89	2456.57	0.982629
0.5404	469.6	2469.09	0.987635
0.54044	921.2	2481.7	0.992681
0.54048	1350	2494.41	0.997764
0.54052	1670	2507.21	1.00288
0.54056	1798	2520.1	1.00804
0.5406	1709	2533.09	1.01323
0.54064	2431	2546.15	1.01846
0.54068	3866	2559.3	1.02372
0.54072	4533	2572.53	1.02901
0.54076	4437	2585.84	1.03434
0.5408	5302	2599.22	1.03969
0.54084	6002	2612.68	1.04507
0.54088	5505	2626.21	1.05049
0.54092	4950	2639.82	1.05593
0.54096	4786	2653.51	1.0614
0.541	4542	2667.27	1.06691
0.54104	3924	2681.13	1.07245
0.54108	3595	2695.07	1.07803
0.54112	2978	2709.11	1.08364
0.54116	2272	2723.25	1.0893
0.5412	1798	2737.49	1.095
0.54124	1255	2751.85	1.10074
0.54128	938.9	2766.33	1.10653
0.54132	1223	2780.93	1.11237
0.54136	1449	2795.65	1.11826
0.5414	1340	2810.51	1.1242
0.54144	1709	2825.5	1.1302
0.54148	1842	2840.62	1.13625
0.54152	1954	2855.88	1.14235
0.54156	2462	2871.28	1.14851
0.5416	2813	2886.82	1.15473
0.54164	3179	2902.5	1.161
0.54168	3237	2918.32	1.16733
0.54172	3374	2934.29	1.17371
0.54176	3365	2950.39	1.18016
0.5418	3096	2966.65	1.18666
0.54184	2985	2983.05	1.19322
0.54188	2564	2999.59	1.19984
0.54192	2362	3016.29	1.20652
0.54196	2182	3033.14	1.21325
0.542	2047	3050.14	1.22005
0.54204	1786	3067.29	1.22691
0.54208	1722	3084.59	1.23384
0.54212	1785	3102.05	1.24082
0.54216	1649	3119.65	1.24786
0.5422	1885	3137.41	1.25496
0.54224	2182	3155.32	1.26213
0.54228	2386	3173.37	1.26935
0.54232	2756	3191.56	1.27663
0.54236	3285	3209.9	1.28396
0.5424	3747	3228.38	1.29135
0.54244	3974	3246.98	1.29879
0.54248	4374	3265.72	1.30629
0.54252	4623	3284.59	1.31384
0.54256	4711	3303.59	1.32144
0.5426	4711	3322.71	1.32908
0.54264	4788	3341.95	1.33678
0.54268	4631	3361.32	1.34453
0.54272	4313	3380.81	1.35233
0.54276	4052	3400.43	1.36017
0.5428	3652	3420.17	1.36807
0.54284	3198	3440.03	1.37601
0.54288	2841	3460.02	1.38401
0.54292	2698	3480.14	1.39206
0.54296	2470	3500.39	1.40015
0.543	2332	3520.76	1.4083
0.54304	2371	3541.27	1.41651
0.54308	2369	3561.9	1.42476
0.54312	2270	3582.66	1.43306
0.54316	2317	3603.55	1.44142
0.5432	2481	3624.56	1.44983
0.54324	2600	3645.7	1.45828
0.54328	2798	3666.95	1.46678
0.54332	3050	3688.33	1.47533
0.54336	3235	3709.81	1.48392
0.5434	3384	3731.4	1.49256
0.54344	3590	3753.1	1.50124
0.54348	3862	3774.91	1.50996
0.54352	4154	3796.8	1.51872
0.54356	4660	3818.8	1.52752
0.5436	5137	3840.88	1.53635
0.54364	5113	3863.04	1.54522
0.54368	4883	3885.29	1.55412
0.54372	4781	3907.62	1.56305
0.54376	4613	3930.03	1.57201
0.5438	4352	3952.51	1.581
0.54384	4185	3975.06	1.59003
0.54388	3913	3997.69	1.59908
0.54392	3529	4020.39	1.60816
0.54396	3298	4043.16	1.61726
0.544	3066	4066	1.6264
0.54404	2778	4088.9	1.63556
0.54408	2714	4111.87	1.64475
0.54412	2803	4134.89	1.65396
0.54416	3009	4157.98	1.66319
0.5442	3285	4181.11	1.67244
0.54424	3565	4204.3	1.68172
0.54428	3853	4227.53	1.69101
0.54432	4209	4250.8	1.70032
0.54436	4627	4274.1	1.70964
0.5444	4923	4297.43	1.71897
0.54444	5237	4320.79	1.72832
0.54448	5475	4344.17	1.73767
0.54452	5570	4367.56	1.74702
0.54456	5539	4390.96	1.75638
0.5446	5453	4414.37	1.76575
0.54464	5258	4437.79	1.77511
0.54468	4958	4461.2	1.78448
0.54472	4637	4484.62	1.79385
0.54476	4300	4508.03	1.80321
0.5448	3956	4531.44	1.81258
0.54484	3651	4554.85	1.82194
0.54488	3434	4578.24	1.8313
0.54492	3237	4601.62	1.84065
0.54496	3232	4624.99	1.85
0.545	3373	4648.34	1.85933
0.54504	3565	4671.66	1.86866
0.54508	3810	4694.96	1.87798
0.54512	4102	4718.22	1.88729
0.54516	4428	4741.45	1.89658
0.5452	4731	4764.63	1.90585
0.54524	4884	4787.76	1.9151
0.54528	5060	4810.83	1.92433
0.54532	5201	4833.85	1.93354
0.54536	5130	4856.79	1.94272
0.5454	5084	4879.67	1.95187
0.54544	5082	4902.46	1.96098
0.54548	4966	4925.17	1.97007
0.54552	4830	4947.79	1.97912
0.54556	4684	4970.32	1.98813
0.5456	4408	4992.74	1.9971
0.54564	4177	5015.06	2.00602
0.54568	4006	5037.26	2.01491
0.54572	3857	5059.35	2.02374
0.54576	3737	5081.32	2.03253
0.5458	3772	5103.15	2.04126
0.54584	3950	5124.84	2.04994
0.54588	4325	5146.38	2.05855
0.54592	4763	5167.77	2.06711
0.54596	5243	5189	2.0756
0.546	5718	5210.05	2.08402
0.54604	6149	5230.92	2.09237
0.54608	6452	5251.6	2.10064
0.54612	6667	5272.07	2.10883
0.54616	6871	5292.34	2.11694
0.5462	6975	5312.4	2.12496
0.54624	7024	5332.24	2.13289
0.54628	6904	5351.84	2.14074
0.54632	6663	5371.22	2.14849
0.54636	6352	5390.35	2.15614
0.5464	6044	5409.25	2.1637
0.54644	5611	5427.89	2.17116
0.54648	5228	5446.29	2.17852
0.54652	4929	5464.44	2.18577
0.54656	4825	5482.32	2.19293
0.5466	4785	5499.95	2.19998
0.54664	4757	5517.31	2.20692
0.54668	4816	5534.4	2.21376
0.54672	4866	5551.21	2.22049
0.54676	4951	5567.75	2.2271
0.5468	4999	5584	2.2336
0.54684	5105	5599.96	2.23998
0.54688	5237	5615.62	2.24625
0.54692	5412	5630.99	2.25239
0.54696	5496	5646.04	2.25842
0.547	5510	5660.78	2.26431
0.54704	5511	5675.2	2.27008
0.54708	5442	5689.29	2.27572
0.54712	5401	5703.05	2.28122
0.54716	5375	5716.46	2.28659
0.5472	5342	5729.53	2.29181
0.54724	5339	5742.25	2.2969
0.54728	5365	5754.61	2.30184
0.54732	5450	5766.6	2.30664
0.54736	5540	5778.22	2.31129
0.5474	5621	5789.45	2.31578
0.54744	5753	5800.29	2.32012
0.54748	5949	5810.74	2.3243
0.54752	6171	5820.78	2.32831
0.54756	6433	5830.42	2.33217
0.5476	6622	5839.63	2.33585
0.54764	6694	5848.41	2.33937
0.54768	6729	5856.77	2.34271
