# Supplementary material for: Shear Thickening Fluids in Cork Agglomerates: An Exploration of Advantages and Drawbacks
Source: Preprints.org preprint supplement (doi:10.20944/preprints202304.0004.v1), 2023-04-03
Supplement: Supplementary file 2 [file Ficha Técnica Flexpur 280A.pdf › Supplementary Material/Binder Information/Ficha Técnica Flexpur 280A.pdf]

## FICHA TÉCNICA

DATA: JULHO DE 2017

REVISÃO: 6

### DESCRIÇÃO

O Flexpur 280A é um pré-polímero de poliuretano resultante da reacção entre polióis e diisocianato de tolueno (TDI). Apresenta-se como um líquido transparente, incolor ou ligeiramente amarelado e sem materiais em suspensão.

### APLICAÇÕES

O Flexpur 280A é destinado à produção de rolhas aglomeradas de cortiça. A reactividade do produto é adequada a processos mais rápidos como moldação.

Para a produção de aglomerados de cortiça, recomenda-se a utilização das seguintes condições:

- **Flexpur 280A:** no mínimo 8 a 12 kg por 100 kg de cortiça, podendo ser necessária maior quantidade dependendo do tamanho e qualidade do granulado e do tipo de processo.
- **Humidade do granulado:** 6 a 10%;
- **Tempo máximo aconselhado de consumo da mistura:** 1 hora, dependendo das condições ambientais (humidade e temperatura);
- **Temperatura de trabalho:** 120 a 140°C.

A temperatura do produto influencia significativamente a sua viscosidade (Figura 1) pelo que, no momento da utilização, deverá situar-se acima dos 20°C, para que a mistura com o granulado seja eficiente.

No processo de extrusão, aconselha-se uma velocidade de 3 a 5 cm/min, dependendo do tipo de granulado e das condições do processo.

### ESPECIFICAÇÕES

| Parâmetro               | Valor       | Método      |
|-------------------------|-------------|-------------|
| Viscosidade a 25°C [cP] | 3000 – 8000 | JQL PUR 002 |
| Teor em NCO [%]         | 2,5 – 3,5   | JQL PUR 003 |
| Teor em extraíveis [%]  | 10 – 14     | JQL PUR 009 |
| Teor em TDI livre [%]   | < 1,0       | *           |

\* Análise externa.

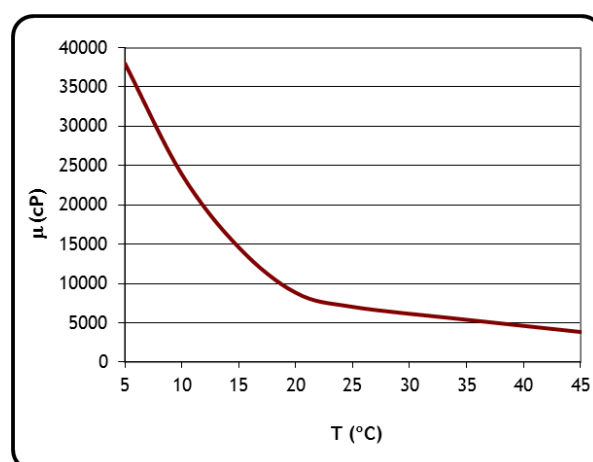

FIGURA 1. VARIAÇÃO DA VISCOSIDADE DO PRODUTO COM A TEMPERATURA.

---

## FICHA TÉCNICA

---

DATA: JULHO DE 2017

REVISÃO: 6

### ARMAZENAMENTO

O Flexpur 280A deve ser armazenado nos recipientes originais ao abrigo de humidade e da luz solar directa. Sob condições de armazenamento adequadas e quando conservado nas embalagens originais seladas, a qualidade do produto é assegurada por um período de 6 meses. A temperatura de armazenamento deverá ser mantida entre os 15 e os 30°C. Sob temperaturas muito baixas, a viscosidade aumenta significativamente, o que poderá provocar dificuldades de processamento.

Consultar a ficha de dados de segurança para informação detalhada acerca do manuseamento, armazenamento e eliminação do produto.

### MANUSEAMENTO

O Flexpur 280A apresenta na sua composição uma quantidade residual de TDI. Como tal, deve-se manusear o produto em locais com boas condições de ventilação e/ou com extracção de ar, principalmente quando usado a temperaturas elevadas. Respeitar sempre as boas práticas relativas à Higiene e Segurança durante o manuseamento de produtos químicos. Evitar o contacto com os olhos e a inalação de vapores. Evitar o contacto prolongado ou repetido com a pele.

Antes de utilizar o produto, consultar a ficha de segurança para informação detalhada sobre Higiene, Segurança e Saúde relacionada com o Flexpur 280A.

### CONTACTO ALIMENTAR

As matérias-primas usadas para a produção do Flexpur 280A encontram-se nas listas da FDA (21 CFR, secção 175.105) e/ou na legislação europeia relativas a materiais que podem ser usados para contacto alimentar. O controlo rigoroso das fontes de contaminação durante o processo de produção asseguram que o Flexpur 280A, após completa reticulação, possa ser usado para o fabrico de artigos destinados a entrar em contacto com alimentos. Os relatórios das análises de verificação da conformidade alimentar do produto encontram-se disponíveis.

### EMBALAGEM

O Flexpur 280A pode ser fornecido em tambores metálicos de 225 kg ou em contentores plásticos de 1000 kg.

Para qualquer informação adicional, contactar:

Flexpur – Polímeros de Poliuretano, S.A.

Rua da Estrada Nova, 785

3885-456 Esmoriz – Portugal

Tel.: +351 256 750 800

Fax.: +351 256 754 900

e-mail: flexpur@mail.telepac.pt

O conteúdo desta Ficha Técnica baseia-se no estado actual do nosso conhecimento e experiência. A informação é fornecida a título orientativo e, como tal, não implica qualquer garantia, expressa ou implícita, relativa à aptidão do produto para determinados fins específicos nem iliba os clientes de efectuarem os seus próprios testes ou análises para verificarem a viabilidade de utilização no seu processo.
