# Supplementary material for: Shear Thickening Fluids in Cork Agglomerates: An Exploration of Advantages and Drawbacks
Source: Preprints.org preprint supplement (doi:10.20944/preprints202304.0004.v1), 2023-04-03
Supplement: Supplementary file 3 [file amostra 0-report.pdf › Supplementary Material/SEM Images/0� STF/amostra 0-report.pdf]

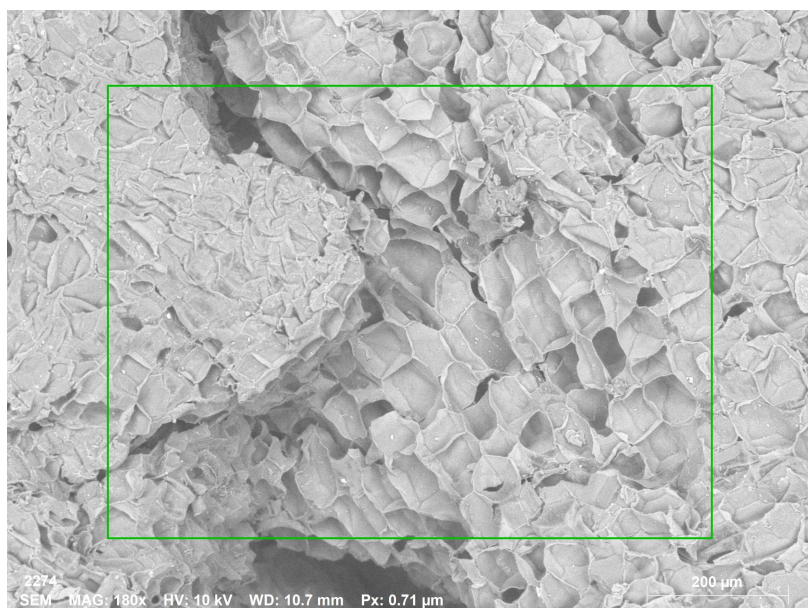

| Name | Date       | Time     | HV<br>[kV] | Mag  | WD<br>[mm] |
|------|------------|----------|------------|------|------------|
| 2274 | 20/07/2022 | 15:12:37 | 10.0 keV   | 180x | 10.7 mm    |

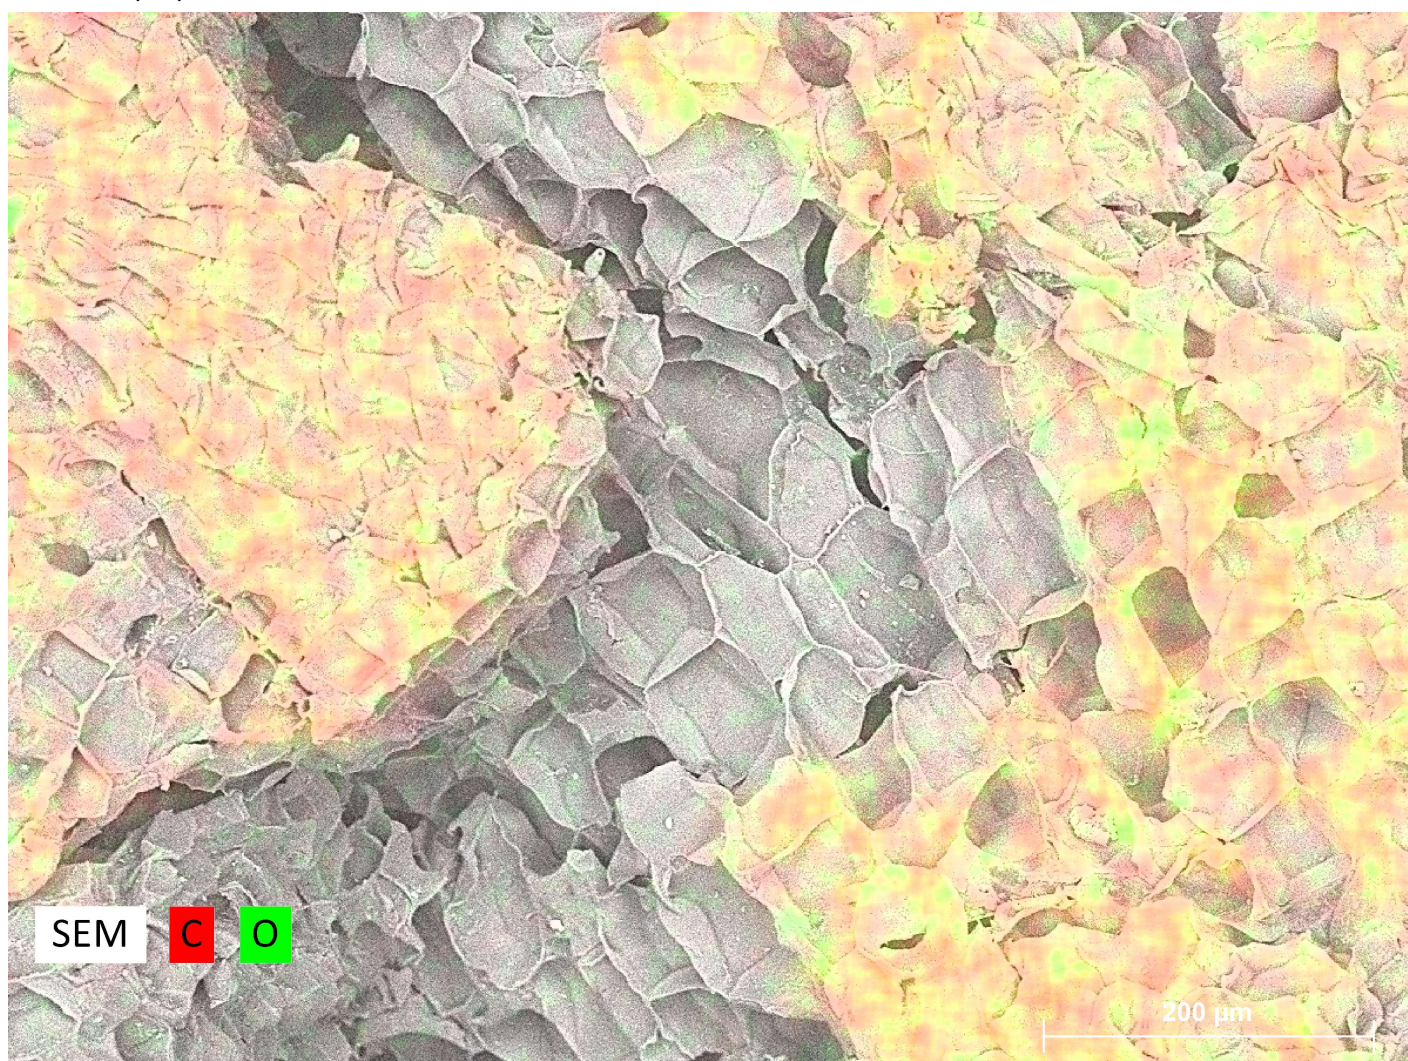

| Name | Date       | Time     | HV<br>[kV] | Mag  | WD<br>[mm] |
|------|------------|----------|------------|------|------------|
| 2274 | 20/07/2022 | 15:13:21 | 10.0 keV   | 180x | 10.7 mm    |



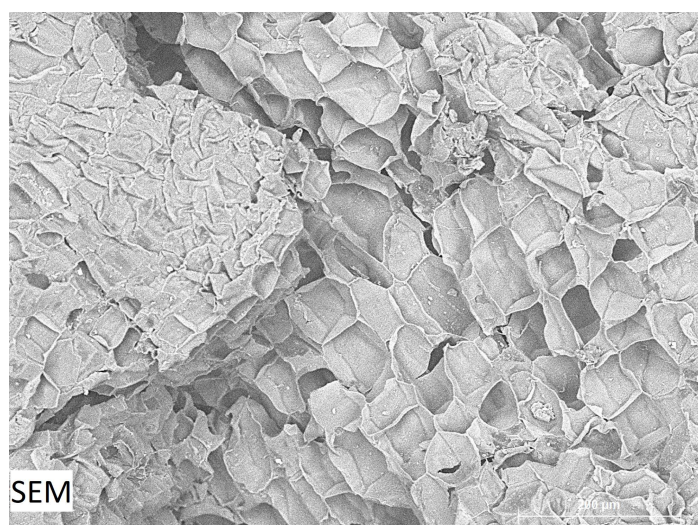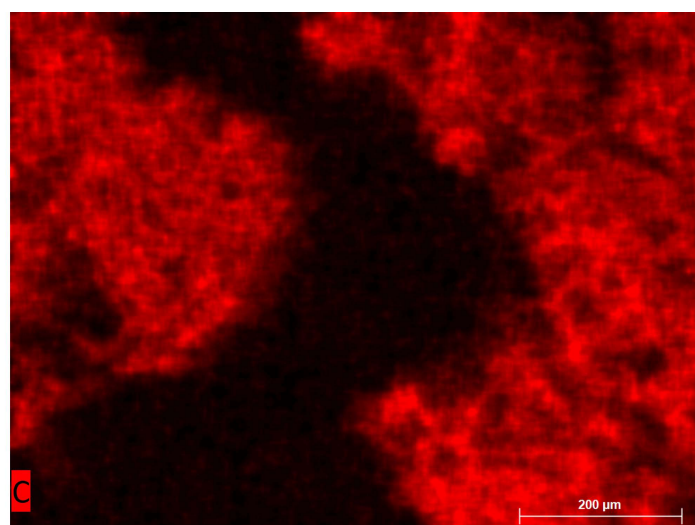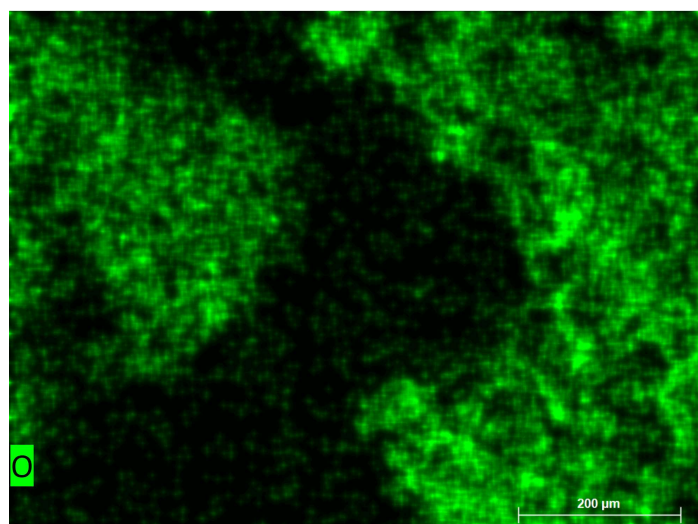

# Application Note

Company / Department

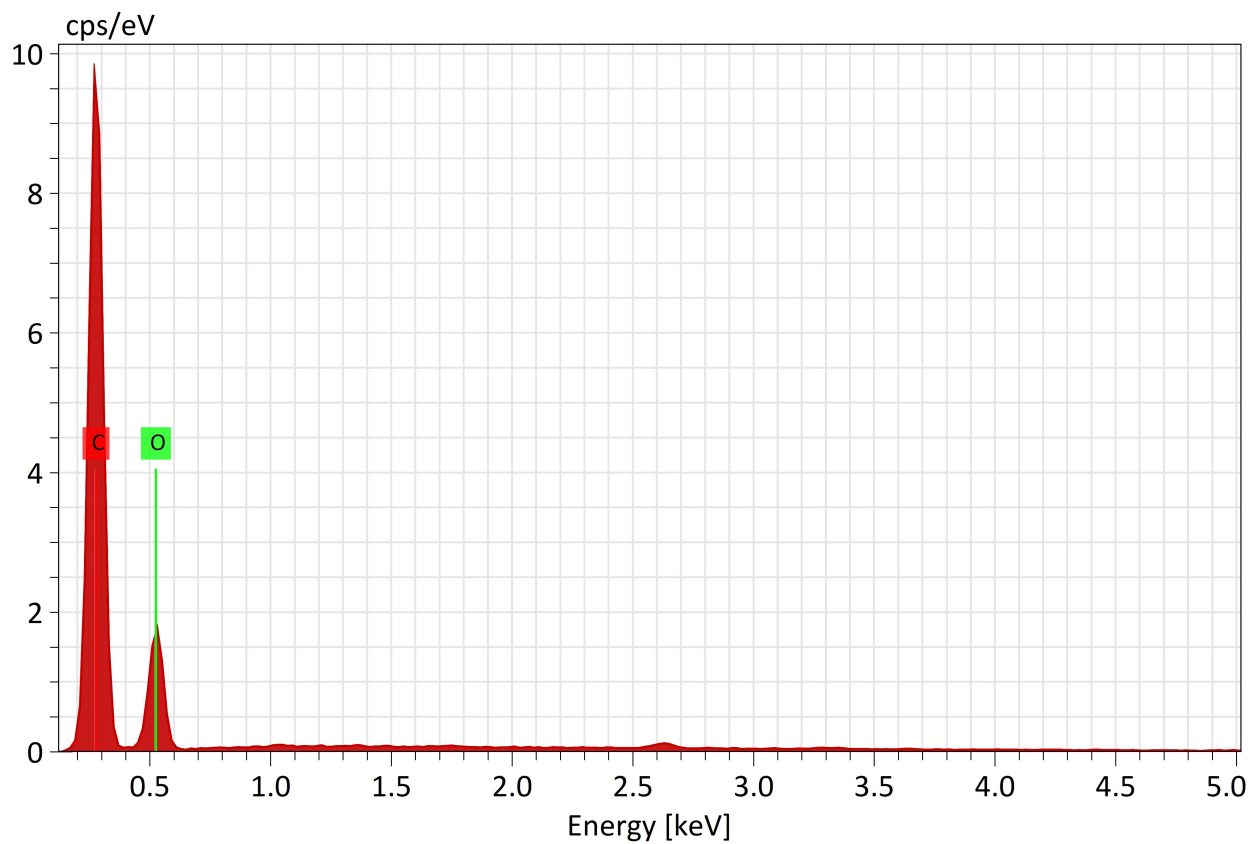

Map

| Element | At. No. | Netto      | Mass [%]      | Mass Norm. [%] | Atom [%]      | abs. error [%]<br>(1 sigma) | rel. error [%]<br>(1 sigma) |
|---------|---------|------------|---------------|----------------|---------------|-----------------------------|-----------------------------|
| C       | 6       | 67956      | 76.26         | 76.26          | 81.06         | 2.88                        | 3.77                        |
| O       | 8       | 12804      | 23.74         | 23.74          | 18.94         | 1.13                        | 4.78                        |
|         |         | <b>Sum</b> | <b>100.00</b> | <b>100.00</b>  | <b>100.00</b> |                             |                             |
