# Supplementary material for: Shear Thickening Fluids in Cork Agglomerates: An Exploration of Advantages and Drawbacks
Source: Preprints.org preprint supplement (doi:10.20944/preprints202304.0004.v1), 2023-04-03
Supplement: Supplementary file 3 [file EN_x_0.xlsx]

## Sheet: data
Time - Voltage - Voltage	Amplitude - Voltage - Voltage
0	558
4e-05	564.7
8e-05	557
0.00012	564.3
0.00016	556.2
0.0002	564
0.00024	556.1
0.00028	563.4
0.00032	556.5
0.00036	562.6
0.0004	557.5
0.00044	562.3
0.00048	558
0.00052	562.4
0.00056	558.7
0.0006	562.5
0.00064	559.3
0.00068	562.9
0.00072	559.9
0.00076	563.2
0.0008	560.7
0.00084	562.9
0.00088	561.2
0.00092	562.2
0.00096	562.4
0.001	561.3
0.00104	563.3
0.00108	559.6
0.00112	564.2
0.00116	558.2
0.0012	564.5
0.00124	556.8
0.00128	564.1
0.00132	556
0.00136	564.2
0.0014	555.9
0.00144	563.4
0.00148	556.3
0.00152	562.4
0.00156	557.1
0.0016	562.4
0.00164	558
0.00168	562.3
0.00172	559
0.00176	562.2
0.0018	559.4
0.00184	562.5
0.00188	559.8
0.00192	563
0.00196	560.4
0.002	563.2
0.00204	561.2
0.00208	562
0.00212	562.4
0.00216	561.1
0.0022	563.7
0.00224	559.7
0.00228	563.9
0.00232	558.2
0.00236	564.6
0.0024	557.2
0.00244	564.6
0.00248	556.1
0.00252	564.2
0.00256	556
0.0026	563.5
0.00264	556.6
0.00268	562.8
0.00272	556.9
0.00276	562.3
0.0028	557.8
0.00284	562.2
0.00288	558.8
0.00292	562.3
0.00296	559.5
0.003	562.5
0.00304	559.7
0.00308	563.4
0.00312	560.2
0.00316	563.1
0.0032	561
0.00324	562.5
0.00328	561.9
0.00332	561
0.00336	562.7
0.0034	559.6
0.00344	564.3
0.00348	558
0.00352	564.5
0.00356	557.1
0.0036	564.3
0.00364	556
0.00368	563.9
0.00372	556.2
0.00376	563.2
0.0038	556.4
0.00384	562.6
0.00388	556.7
0.00392	562.2
0.00396	557.5
0.004	561.9
0.00404	558.7
0.00408	562.1
0.00412	559.4
0.00416	562.6
0.0042	559.7
0.00424	562.7
0.00428	560.1
0.00432	563.1
0.00436	560.9
0.0044	562.8
0.00444	561.5
0.00448	561.4
0.00452	563
0.00456	559.7
0.0046	564
0.00464	558.1
0.00468	564.5
0.00472	557
0.00476	564.4
0.0048	556.3
0.00484	564.2
0.00488	555.6
0.00492	563.5
0.00496	556.1
0.005	562.8
0.00504	556.9
0.00508	562.2
0.00512	557.6
0.00516	562
0.0052	558.2
0.00524	562.6
0.00528	559
0.00532	562.4
0.00536	559.7
0.0054	563
0.00544	560.3
0.00548	563
0.00552	560.7
0.00556	562.6
0.0056	561.5
0.00564	561.5
0.00568	562.9
0.00572	560
0.00576	564
0.0058	558.4
0.00584	564.3
0.00588	557.3
0.00592	564.4
0.00596	556.2
0.006	564.4
0.00604	555.6
0.00608	563.8
0.00612	555.9
0.00616	562.9
0.0062	556.7
0.00624	562.4
0.00628	557.7
0.00632	562.2
0.00636	558.1
0.0064	561.9
0.00644	558.7
0.00648	562.3
0.00652	559.3
0.00656	562.9
0.0066	560.1
0.00664	562.9
0.00668	560.8
0.00672	562.8
0.00676	561.6
0.0068	562.1
0.00684	562.4
0.00688	560.4
0.00692	563.6
0.00696	559
0.007	563.8
0.00704	557.7
0.00708	564.5
0.00712	556.3
0.00716	564.3
0.0072	555.6
0.00724	563.9
0.00728	555.9
0.00732	563
0.00736	556.3
0.0074	562.4
0.00744	557.3
0.00748	561.9
0.00752	558.2
0.00756	561.9
0.0076	558.3
0.00764	562.5
0.00768	559.6
0.00772	562.9
0.00776	559.7
0.0078	562.9
0.00784	560.2
0.00788	562.8
0.00792	561.1
0.00796	561.8
0.008	562.3
0.00804	560.2
0.00808	563.5
0.00812	558.9
0.00816	564.1
0.0082	557.8
0.00824	564.4
0.00828	556.6
0.00832	564.1
0.00836	556.1
0.0084	563.8
0.00844	555.8
0.00848	563.2
0.00852	556.5
0.00856	562.8
0.0086	557.1
0.00864	562.1
0.00868	558
0.00872	561.9
0.00876	558.9
0.0088	562.3
0.00884	559.6
0.00888	562.8
0.00892	559.7
0.00896	563.3
0.009	560.9
0.00904	562.8
0.00908	561.5
0.00912	561.7
0.00916	562.3
0.0092	560.5
0.00924	563.6
0.00928	559.2
0.00932	564.2
0.00936	557.7
0.0094	564.4
0.00944	556.8
0.00948	564.3
0.00952	556.1
0.00956	563.8
0.0096	555.9
0.00964	562.8
0.00968	556.3
0.00972	562.6
0.00976	557
0.0098	562.3
0.00984	558.4
0.00988	561.8
0.00992	558.6
0.00996	562.5
0.01	559.2
0.01004	562.8
0.01008	560
0.01012	562.8
0.01016	560.5
0.0102	563
0.01024	560.9
0.01028	561.8
0.01032	562.6
0.01036	560.6
0.0104	563.6
0.01044	559.2
0.01048	564.5
0.01052	557.5
0.01056	564.6
0.0106	556.5
0.01064	564.3
0.01068	556.1
0.01072	563.3
0.01076	555.8
0.0108	563.3
0.01084	556.5
0.01088	562.5
0.01092	557.7
0.01096	561.9
0.011	558
0.01104	562.3
0.01108	558.8
0.01112	563
0.01116	559.2
0.0112	562.7
0.01124	560.1
0.01128	562.8
0.01132	560.1
0.01136	563
0.0114	561
0.01144	562.3
0.01148	562.3
0.01152	560.7
0.01156	563.7
0.0116	559.4
0.01164	564.3
0.01168	557.9
0.01172	564.4
0.01176	556.7
0.0118	564.6
0.01184	555.9
0.01188	563.7
0.01192	556.2
0.01196	563.2
0.012	556.8
0.01204	562.4
0.01208	557.5
0.01212	561.9
0.01216	557.5
0.0122	562.6
0.01224	558.8
0.01228	562.3
0.01232	558.8
0.01236	562.9
0.0124	559.6
0.01244	563.1
0.01248	560.4
0.01252	563.1
0.01256	561.2
0.0126	562
0.01264	562.2
0.01268	561.5
0.01272	563.3
0.01276	559.7
0.0128	564
0.01284	558.5
0.01288	564.5
0.01292	557
0.01296	564.6
0.013	556
0.01304	564.2
0.01308	556.2
0.01312	563.3
0.01316	556.4
0.0132	563
0.01324	556.9
0.01328	562
0.01332	557.8
0.01336	562.2
0.0134	558.6
0.01344	562.6
0.01348	559.1
0.01352	563
0.01356	559.8
0.0136	563.2
0.01364	560.1
0.01368	563.5
0.01372	560.6
0.01376	562.8
0.0138	562.1
0.01384	561.2
0.01388	563.2
0.01392	559.7
0.01396	564
0.014	558.7
0.01404	564.2
0.01408	557.4
0.01412	564.7
0.01416	556.2
0.0142	564.1
0.01424	556
0.01428	563.6
0.01432	556.2
0.01436	562.7
0.0144	556.9
0.01444	562.4
0.01448	557.5
0.01452	562.2
0.01456	558.2
0.0146	562.5
0.01464	559.2
0.01468	562.5
0.01472	559.3
0.01476	563.2
0.0148	560
0.01484	563.3
0.01488	560.6
0.01492	562.8
0.01496	561.7
0.015	561.9
0.01504	563
0.01508	560.3
0.01512	563.9
0.01516	558.6
0.0152	564.6
0.01524	557.3
0.01528	564.6
0.01532	556.4
0.01536	564.3
0.0154	555.9
0.01544	563.6
0.01548	556.3
0.01552	563.1
0.01556	556.8
0.0156	562.5
0.01564	557.8
0.01568	562.3
0.01572	558.6
0.01576	562.4
0.0158	558.9
0.01584	562.6
0.01588	559.7
0.01592	562.9
0.01596	560.3
0.016	563.2
0.01604	560.6
0.01608	562.8
0.01612	562
0.01616	561.9
0.0162	562.8
0.01624	560.5
0.01628	563.8
0.01632	558.7
0.01636	564.6
0.0164	557.5
0.01644	564.9
0.01648	556.4
0.01652	563.9
0.01656	556.2
0.0166	563.8
0.01664	556.2
0.01668	563.3
0.01672	557.2
0.01676	562.4
0.0168	557.5
0.01684	562.6
0.01688	558.3
0.01692	562.5
0.01696	559.3
0.017	562.5
0.01704	559.8
0.01708	563
0.01712	560.1
0.01716	563.3
0.0172	561.1
0.01724	562.6
0.01728	561.9
0.01732	561.9
0.01736	562.6
0.0174	560.6
0.01744	563.7
0.01748	559
0.01752	564.8
0.01756	557.3
0.0176	564.6
0.01764	556.4
0.01768	564.3
0.01772	556
0.01776	563.9
0.0178	556.3
0.01784	562.9
0.01788	556.9
0.01792	562.4
0.01796	557.8
0.018	562.4
0.01804	558.5
0.01808	562.5
0.01812	559.1
0.01816	563
0.0182	559.7
0.01824	563.3
0.01828	560
0.01832	563.1
0.01836	560.7
0.0184	562.6
0.01844	562.1
0.01848	561.7
0.01852	562.7
0.01856	560.3
0.0186	564.3
0.01864	558.7
0.01868	564.4
0.01872	557.1
0.01876	564.8
0.0188	556.6
0.01884	564.6
0.01888	555.9
0.01892	563.6
0.01896	556.2
0.019	563.2
0.01904	556.9
0.01908	562.6
0.01912	557.6
0.01916	562
0.0192	558.5
0.01924	562.7
0.01928	559
0.01932	562.8
0.01936	559.2
0.0194	563.3
0.01944	560.4
0.01948	563.3
0.01952	560.9
0.01956	562.4
0.0196	562.4
0.01964	561.4
0.01968	563
0.01972	560.4
0.01976	564
0.0198	558.6
0.01984	564.7
0.01988	557.4
0.01992	564.7
0.01996	556.5
0.02	564.2
0.02004	556
0.02008	563.7
0.02012	556
0.02016	563
0.0202	556.6
0.02024	562.6
0.02028	557.7
0.02032	562.1
0.02036	558.4
0.0204	562.4
0.02044	559.2
0.02048	562.6
0.02052	559.6
0.02056	563.2
0.0206	560.2
0.02064	563.2
0.02068	560.8
0.02072	562.9
0.02076	561.6
0.0208	561.5
0.02084	563
0.02088	560.1
0.02092	564.1
0.02096	558.6
0.021	564.4
0.02104	557.5
0.02108	564.9
0.02112	556.6
0.02116	564.2
0.0212	555.9
0.02124	563.7
0.02128	556.3
0.02132	562.9
0.02136	556.9
0.0214	562.5
0.02144	557.9
0.02148	562.6
0.02152	558.3
0.02156	562.4
0.0216	558.9
0.02164	562.7
0.02168	559.9
0.02172	563
0.02176	560.3
0.0218	563
0.02184	561.1
0.02188	562.5
0.02192	561.9
0.02196	561.9
0.022	562.9
0.02204	560.2
0.02208	564
0.02212	558.7
0.02216	564.6
0.0222	557.1
0.02224	564.5
0.02228	556.6
0.02232	564.3
0.02236	556.4
0.0224	563.2
0.02244	556.2
0.02248	562.7
0.02252	557.4
0.02256	562.3
0.0226	557.6
0.02264	562.2
0.02268	558.2
0.02272	562.2
0.02276	559.6
0.0228	562.2
0.02284	560.1
0.02288	562.5
0.02292	560
0.02296	563.3
0.023	560.9
0.02304	562.3
0.02308	561.8
0.02312	561.1
0.02316	563
0.0232	560.2
0.02324	563.9
0.02328	558.9
0.02332	564.8
0.02336	557
0.0234	564.4
0.02344	556.2
0.02348	564.3
0.02352	556
0.02356	563.7
0.0236	556.2
0.02364	563
0.02368	556.6
0.02372	562.8
0.02376	557
0.0238	562.3
0.02384	558.3
0.02388	562.3
0.02392	559.2
0.02396	562.5
0.024	559.3
0.02404	563.1
0.02408	560
0.02412	562.8
0.02416	560.9
0.0242	562.8
0.02424	561.6
0.02428	561.5
0.02432	562.6
0.02436	560.4
0.0244	563.9
0.02444	558.9
0.02448	564.1
0.02452	557.4
0.02456	564.3
0.0246	556.5
0.02464	564.3
0.02468	555.8
0.02472	563.8
0.02476	555.8
0.0248	563
0.02484	556.3
0.02488	562.4
0.02492	557.4
0.02496	562
0.025	558.4
0.02504	562.3
0.02508	558.7
0.02512	562.7
0.02516	559.3
0.0252	562.6
0.02524	559.8
0.02528	563
0.02532	560.7
0.02536	562.7
0.0254	561.6
0.02544	561.7
0.02548	562.9
0.02552	560
0.02556	563.7
0.0256	558.6
0.02564	564.6
0.02568	557.3
0.02572	564.5
0.02576	556.4
0.0258	564.1
0.02584	555.6
0.02588	563.7
0.02592	555.7
0.02596	562.9
0.026	556.4
0.02604	562.5
0.02608	557.3
0.02612	562.3
0.02616	558.4
0.0262	561.9
0.02624	559
0.02628	562.2
0.02632	559.5
0.02636	563.1
0.0264	560
0.02644	563
0.02648	560.5
0.02652	562.8
0.02656	561.5
0.0266	561.9
0.02664	562.5
0.02668	560
0.02672	563.6
0.02676	558.6
0.0268	564.6
0.02684	557.6
0.02688	564.5
0.02692	556.4
0.02696	564.3
0.027	555.8
0.02704	563.2
0.02708	555.8
0.02712	562.9
0.02716	556.4
0.0272	562.6
0.02724	556.9
0.02728	562.2
0.02732	558
0.02736	562.2
0.0274	558.7
0.02744	562.3
0.02748	559.3
0.02752	562.6
0.02756	560
0.0276	562.9
0.02764	560.3
0.02768	562.7
0.02772	561.4
0.02776	562
0.0278	562.4
0.02784	560.5
0.02788	563.4
0.02792	558.8
0.02796	564.5
0.028	557.4
0.02804	564.4
0.02808	556.4
0.02812	564.2
0.02816	555.8
0.0282	563.6
0.02824	556.1
0.02828	563.1
0.02832	556.3
0.02836	562.3
0.0284	556.9
0.02844	562.1
0.02848	558
0.02852	562.2
0.02856	558.7
0.0286	562.3
0.02864	559.3
0.02868	562.8
0.02872	559.9
0.02876	562.8
0.0288	560.5
0.02884	562.7
0.02888	561.3
0.02892	561.8
0.02896	562.4
0.029	560.6
0.02904	563.4
0.02908	559
0.02912	564.1
0.02916	557.6
0.0292	564.6
0.02924	556.4
0.02928	564.5
0.02932	555.8
0.02936	564
0.0294	555.7
0.02944	563.1
0.02948	556.4
0.02952	562.3
0.02956	557.1
0.0296	562.2
0.02964	558
0.02968	562.2
0.02972	558.6
0.02976	562.6
0.0298	558.7
0.02984	562.9
0.02988	559.7
0.02992	562.9
0.02996	560.5
0.03	562.6
0.03004	561.4
0.03008	561.8
0.03012	562.7
0.03016	560.6
0.0302	563.4
0.03024	559.4
0.03028	563.6
0.03032	558
0.03036	564.5
0.0304	556.6
0.03044	564.4
0.03048	556.3
0.03052	563.7
0.03056	556.1
0.0306	562.9
0.03064	556.2
0.03068	562.8
0.03072	557.2
0.03076	562.2
0.0308	558.1
0.03084	561.9
0.03088	558.5
0.03092	562.5
0.03096	559
0.031	563.1
0.03104	559.7
0.03108	563.2
0.03112	560.4
0.03116	562.8
0.0312	561.3
0.03124	561.7
0.03128	562.6
0.03132	560.8
0.03136	563.3
0.0314	559.2
0.03144	563.9
0.03148	557.9
0.03152	564.7
0.03156	556.7
0.0316	564.4
0.03164	556.2
0.03168	564
0.03172	556
0.03176	563.4
0.0318	556.2
0.03184	562.8
0.03188	557.1
0.03192	562
0.03196	558
0.032	561.7
0.03204	558.7
0.03208	562.2
0.03212	559.5
0.03216	563
0.0322	559.6
0.03224	563.2
0.03228	560.2
0.03232	563.3
0.03236	561.3
0.0324	562.7
0.03244	562.1
0.03248	560.8
0.03252	563.3
0.03256	559.4
0.0326	564.1
0.03264	558.1
0.03268	564.3
0.03272	556.9
0.03276	564.4
0.0328	556.3
0.03284	564.1
0.03288	556
0.03292	563.2
0.03296	556.2
0.033	562.8
0.03304	557.1
0.03308	562.4
0.03312	558
0.03316	562
0.0332	558.9
0.03324	562.6
0.03328	559.3
0.03332	562.5
0.03336	559.9
0.0334	563.2
0.03344	562.9
0.03348	563
0.03352	561.1
0.03356	562.4
0.0336	562.1
0.03364	560.7
0.03368	563.3
0.03372	559.9
0.03376	564.2
0.0338	558
0.03384	564.6
0.03388	556.8
0.03392	564.1
0.03396	556
0.034	564.2
0.03404	555.9
0.03408	563.5
0.03412	556.2
0.03416	562.6
0.0342	557.1
0.03424	562.4
0.03428	558
0.03432	562.4
0.03436	558.4
0.0344	562.5
0.03444	559.1
0.03448	563
0.03452	560
0.03456	563
0.0346	560.6
0.03464	563
0.03468	561.4
0.03472	562
0.03476	562.2
0.0348	561.1
0.03484	563.3
0.03488	559.7
0.03492	564
0.03496	558.3
0.035	564.6
0.03504	556.8
0.03508	564.6
0.03512	556.1
0.03516	564.1
0.0352	556.1
0.03524	563.3
0.03528	556.6
0.03532	562.6
0.03536	557.4
0.0354	562.4
0.03544	558
0.03548	562
0.03552	559
0.03556	562.4
0.0356	559.3
0.03564	563
0.03568	559.7
0.03572	563.3
0.03576	560.4
0.0358	562.8
0.03584	561.3
0.03588	562.3
0.03592	562.3
0.03596	560.9
0.036	563.7
0.03604	559.4
0.03608	564
0.03612	558.2
0.03616	564.5
0.0362	556.7
0.03624	564.6
0.03628	556.4
0.03632	563.9
0.03636	556.1
0.0364	563.4
0.03644	556.3
0.03648	563.1
0.03652	557.2
0.03656	562.2
0.0366	558.2
0.03664	562
0.03668	558.7
0.03672	562.5
0.03676	559.7
0.0368	562.9
0.03684	560.1
0.03688	563.3
0.03692	560.5
0.03696	563
0.037	561.3
0.03704	562.2
0.03708	563
0.03712	561
0.03716	563.3
0.0372	559.6
0.03724	564.3
0.03728	558.1
0.03732	564.8
0.03736	556.9
0.0374	564.4
0.03744	556.2
0.03748	564.2
0.03752	556.1
0.03756	563.3
0.0376	556.5
0.03764	562.8
0.03768	557.5
0.03772	562.3
0.03776	558.2
0.0378	562.2
0.03784	558.9
0.03788	562.7
0.03792	559.8
0.03796	563
0.038	560.2
0.03804	563.3
0.03808	560.8
0.03812	563
0.03816	561.8
0.0382	562
0.03824	563
0.03828	560.5
0.03832	563.9
0.03836	559.1
0.0384	564.5
0.03844	557.4
0.03848	564.7
0.03852	556.5
0.03856	564.4
0.0386	556.2
0.03864	563.5
0.03868	556.1
0.03872	563.4
0.03876	556.8
0.0388	562.8
0.03884	557.3
0.03888	562.4
0.03892	558.3
0.03896	562.5
0.039	559
0.03904	562.6
0.03908	559.7
0.03912	563
0.03916	560.3
0.0392	563.2
0.03924	560.7
0.03928	562.8
0.03932	561.8
0.03936	562.1
0.0394	563
0.03944	560.8
0.03948	563.7
0.03952	559.1
0.03956	564.7
0.0396	557.6
0.03964	565
0.03968	556.4
0.03972	564.2
0.03976	556.3
0.0398	563.9
0.03984	556.3
0.03988	562.9
0.03992	556.6
0.03996	562.5
0.04	557.9
0.04004	562.5
0.04008	558.3
0.04012	562.6
0.04016	559.1
0.0402	562.6
0.04024	559.7
0.04028	563
0.04032	560.2
0.04036	563.1
0.0404	561
0.04044	562.8
0.04048	561.8
0.04052	561.8
0.04056	562.8
0.0406	561
0.04064	563.6
0.04068	558.7
0.04072	564.4
0.04076	557.4
0.0408	565
0.04084	556.3
0.04088	564.5
0.04092	556
0.04096	563.9
0.041	556.1
0.04104	563.4
0.04108	556.9
0.04112	562.6
0.04116	557.5
0.0412	562.4
0.04124	558.3
0.04128	562.3
0.04132	559
0.04136	562.6
0.0414	559.5
0.04144	563.3
0.04148	559.7
0.04152	562.8
0.04156	560.7
0.0416	562.9
0.04164	561.9
0.04168	561.6
0.04172	563
0.04176	560.3
0.0418	564
0.04184	558.8
0.04188	564.3
0.04192	557.6
0.04196	564.6
0.042	556.4
0.04204	564.4
0.04208	556.2
0.04212	563.8
0.04216	556.1
0.0422	562.7
0.04224	556.6
0.04228	562.5
0.04232	557.7
0.04236	561.9
0.0424	558.4
0.04244	562.3
0.04248	559.4
0.04252	562.6
0.04256	559.4
0.0426	563.2
0.04264	560.3
0.04268	563
0.04272	560.7
0.04276	562.8
0.0428	561.6
0.04284	562
0.04288	562.8
0.04292	560.4
0.04296	563.7
0.043	558.8
0.04304	564.6
0.04308	557.4
0.04312	564.6
0.04316	556.7
0.0432	564.2
0.04324	556.2
0.04328	563.7
0.04332	555.9
0.04336	563.2
0.0434	556.3
0.04344	562.9
0.04348	557.4
0.04352	562.1
0.04356	558.2
0.0436	562.2
0.04364	559.2
0.04368	562
0.04372	559.8
0.04376	563
0.0438	560.3
0.04384	563.2
0.04388	560.5
0.04392	562.9
0.04396	561.5
0.044	561.7
0.04404	562.4
0.04408	560.5
0.04412	563.7
0.04416	558.6
0.0442	564.4
0.04424	557.2
0.04428	564.4
0.04432	556.2
0.04436	564.1
0.0444	556
0.04444	563.6
0.04448	555.9
0.04452	563
0.04456	556.6
0.0446	562.5
0.04464	557.5
0.04468	562
0.04472	558.3
0.04476	562
0.0448	559.1
0.04484	562.6
0.04488	559.4
0.04492	563
0.04496	560.2
0.045	562.9
0.04504	561
0.04508	562.6
0.04512	561.6
0.04516	561.6
0.0452	562.8
0.04524	559.8
0.04528	563.7
0.04532	558.7
0.04536	564.3
0.0454	557.5
0.04544	564.3
0.04548	556.1
0.04552	564.3
0.04556	555.9
0.0456	563.5
0.04564	556
0.04568	563.1
0.04572	556.6
0.04576	562.1
0.0458	557.7
0.04584	562.2
0.04588	558.2
0.04592	562.3
0.04596	558.6
0.046	562.5
0.04604	559.7
0.04608	563
0.04612	560.1
0.04616	563.1
0.0462	560.7
0.04624	562.4
0.04628	561.6
0.04632	561.4
0.04636	562.8
0.0464	560.1
0.04644	563.8
0.04648	558.4
0.04652	564.5
0.04656	557.3
0.0466	564.5
0.04664	556.2
0.04668	564.1
0.04672	555.8
0.04676	563.5
0.0468	555.7
0.04684	563.1
0.04688	557.1
0.04692	562.2
0.04696	557.8
0.047	562.2
0.04704	558.3
0.04708	562.1
0.04712	559
0.04716	562.6
0.0472	559.4
0.04724	562.9
0.04728	559.9
0.04732	563
0.04736	560.9
0.0474	562.3
0.04744	561.8
0.04748	561.5
0.04752	562.9
0.04756	559.9
0.0476	564
0.04764	558.1
0.04768	564.6
0.04772	557
0.04776	564.4
0.0478	556
0.04784	563.8
0.04788	555.5
0.04792	563.3
0.04796	556.3
0.048	562.4
0.04804	556.5
0.04808	562.2
0.04812	558
0.04816	562
0.0482	558.2
0.04824	562.2
0.04828	559.2
0.04832	562.5
0.04836	559.7
0.0484	562.7
0.04844	560.2
0.04848	563
0.04852	561
0.04856	562.4
0.0486	561.9
0.04864	561
0.04868	563.3
0.04872	559.4
0.04876	564
0.0488	558
0.04884	564.6
0.04888	557
0.04892	564.4
0.04896	556.2
0.049	563.9
0.04904	555.9
0.04908	563.3
0.04912	556.1
0.04916	562.7
0.0492	556.8
0.04924	562.4
0.04928	557.9
0.04932	562.1
0.04936	558.3
0.0494	562.2
0.04944	559.2
0.04948	562.7
0.04952	559.4
0.04956	562.9
0.0496	560.5
0.04964	563
0.04968	561.1
0.04972	562
0.04976	562.3
0.0498	561.1
0.04984	562.6
0.04988	559.7
0.04992	563.7
0.04996	558.1
0.05	564.6
0.05004	557.1
0.05008	564.4
0.05012	556
0.05016	564
0.0502	555.9
0.05024	563.3
0.05028	556.2
0.05032	562.6
0.05036	557.1
0.0504	562.1
0.05044	557.4
0.05048	562.4
0.05052	558.7
0.05056	562.2
0.0506	559.1
0.05064	562.3
0.05068	559.5
0.05072	563.1
0.05076	560.1
0.0508	563
0.05084	561.2
0.05088	562.4
0.05092	562
0.05096	561.4
0.051	562.9
0.05104	559.7
0.05108	563.9
0.05112	558.4
0.05116	564.4
0.0512	557
0.05124	564.4
0.05128	556
0.05132	564.1
0.05136	555.6
0.0514	563.6
0.05144	555.8
0.05148	562.7
0.05152	557
0.05156	562.2
0.0516	558.3
0.05164	562
0.05168	558.3
0.05172	562.3
0.05176	559.1
0.0518	562.6
0.05184	559.7
0.05188	562.9
0.05192	560.2
0.05196	562.9
0.052	560.7
0.05204	562.8
0.05208	561.9
0.05212	561.3
0.05216	563.2
0.0522	560
0.05224	564.2
0.05228	558.3
0.05232	564.3
0.05236	556.9
0.0524	564.5
0.05244	556.1
0.05248	564.1
0.05252	555.7
0.05256	563.7
0.0526	556.1
0.05264	563.1
0.05268	556.9
0.05272	562.1
0.05276	557.8
0.0528	562.6
0.05284	558.4
0.05288	562.1
0.05292	559.1
0.05296	562.9
0.053	559.7
0.05304	563.4
0.05308	559.8
0.05312	563
0.05316	560.9
0.0532	562.2
0.05324	562
0.05328	561.6
0.05332	563.2
0.05336	559.5
0.0534	564.3
0.05344	558.1
0.05348	564
0.05352	557.1
0.05356	564.5
0.0536	556.3
0.05364	563.9
0.05368	555.8
0.05372	563.4
0.05376	556.4
0.0538	562.7
0.05384	557
0.05388	562.6
0.05392	557.9
0.05396	562.2
0.054	558.9
0.05404	562.3
0.05408	559.5
0.05412	562.8
0.05416	559.8
0.0542	562.9
0.05424	560.8
0.05428	563
0.05432	561.3
0.05436	562.3
0.0544	562.3
0.05444	561.1
0.05448	563.4
0.05452	559.6
0.05456	564.2
0.0546	558
0.05464	564.7
0.05468	556.7
0.05472	564.7
0.05476	556
0.0548	563.9
0.05484	556.2
0.05488	563.3
0.05492	556.1
0.05496	563
0.055	557
0.05504	562.4
0.05508	558
0.05512	562.1
0.05516	558.9
0.0552	562.6
0.05524	559.3
0.05528	562.9
0.05532	559.9
0.05536	563.1
0.0554	560.6
0.05544	563.1
0.05548	561.2
0.05552	562.6
0.05556	562.3
0.0556	561.3
0.05564	563.2
0.05568	559.7
0.05572	564.3
0.05576	558.1
0.0558	564.6
0.05584	557
0.05588	564.6
0.05592	556.2
0.05596	564.4
0.056	555.9
0.05604	563.3
0.05608	556.4
0.05612	562.6
0.05616	557
0.0562	562.4
0.05624	558
0.05628	562.2
0.05632	558.3
0.05636	562.4
0.0564	559.5
0.05644	562.8
0.05648	559.9
0.05652	562.9
0.05656	560.6
0.0566	563.1
0.05664	561.3
0.05668	562.2
0.05672	561.7
0.05676	561.3
0.0568	563.3
0.05684	559.6
0.05688	564.2
0.05692	558.5
0.05696	564.7
0.057	557.2
0.05704	564.5
0.05708	556.3
0.05712	564.4
0.05716	556
0.0572	563.6
0.05724	556.5
0.05728	563.1
0.05732	556.8
0.05736	562.5
0.0574	558.2
0.05744	562.2
0.05748	558.7
0.05752	562.6
0.05756	559.6
0.0576	563
0.05764	560
0.05768	563.2
0.05772	560.3
0.05776	563.2
0.0578	561.2
0.05784	562.5
0.05788	562.1
0.05792	561.2
0.05796	563.5
0.058	559.7
0.05804	564
0.05808	558.3
0.05812	564.6
0.05816	557.4
0.0582	564.6
0.05824	556.3
0.05828	564.2
0.05832	556.1
0.05836	563.6
0.0584	556.4
0.05844	563.1
0.05848	557
0.05852	562.4
0.05856	558
0.0586	562.2
0.05864	558.9
0.05868	562.4
0.05872	559.3
0.05876	562.8
0.0588	560
0.05884	563.3
0.05888	560.8
0.05892	563
0.05896	561.3
0.059	562.4
0.05904	562.3
0.05908	561.3
0.05912	563.5
0.05916	559.7
0.0592	564.3
0.05924	558.1
0.05928	564.6
0.05932	557.1
0.05936	564.6
0.0594	556.2
0.05944	564.1
0.05948	555.9
0.05952	563.5
0.05956	556.4
0.0596	562.9
0.05964	557.1
0.05968	562.5
0.05972	558
0.05976	562.3
0.0598	558.8
0.05984	562.6
0.05988	559.6
0.05992	562.7
0.05996	559.7
0.06	563.3
0.06004	560.5
0.06008	562.8
0.06012	561.4
0.06016	562.6
0.0602	562.2
0.06024	561.3
0.06028	563.7
0.06032	559.6
0.06036	564
0.0604	558
0.06044	564.6
0.06048	556.6
0.06052	564.8
0.06056	555.8
0.0606	564.2
0.06064	556
0.06068	563.2
0.06072	556.4
0.06076	562.8
0.0608	557.3
0.06084	562.5
0.06088	558
0.06092	562.6
0.06096	558.5
0.061	562.3
0.06104	559.2
0.06108	563
0.06112	559.9
0.06116	563
0.0612	560.8
0.06124	562.9
0.06128	561.3
0.06132	562.2
0.06136	562.2
0.0614	561.1
0.06144	563.3
0.06148	559.5
0.06152	564.2
0.06156	558
0.0616	564.6
0.06164	556.8
0.06168	564.6
0.06172	556
0.06176	563.7
0.0618	556.4
0.06184	563.3
0.06188	556.2
0.06192	562.9
0.06196	557.3
0.062	562.4
0.06204	558
0.06208	562.5
0.06212	558.7
0.06216	562.5
0.0622	559
0.06224	563
0.06228	559.7
0.06232	563.3
0.06236	560.5
0.0624	562.8
0.06244	561.4
0.06248	562.2
0.06252	562.6
0.06256	561.3
0.0626	563.4
0.06264	559.1
0.06268	564.1
0.06272	557.9
0.06276	564.5
0.0628	556.6
0.06284	564.5
0.06288	556.1
0.06292	564.1
0.06296	555.8
0.063	563
0.06304	556.4
0.06308	562.7
0.06312	556.6
0.06316	562.4
0.0632	558
0.06324	562.2
0.06328	558.9
0.06332	562.2
0.06336	559.5
0.0634	562.8
0.06344	560
0.06348	563
0.06352	560.5
0.06356	562.9
0.0636	561
0.06364	562.4
0.06368	562.3
0.06372	561
0.06376	563.5
0.0638	559.5
0.06384	564.1
0.06388	557.8
0.06392	564.5
0.06396	556.6
0.064	564.9
0.06404	555.9
0.06408	563.7
0.06412	556
0.06416	563.3
0.0642	556.1
0.06424	562.9
0.06428	557
0.06432	562.2
0.06436	557.7
0.0644	562
0.06444	558.7
0.06448	562.4
0.06452	559.4
0.06456	562.7
0.0646	560
0.06464	563.3
0.06468	560.3
0.06472	563
0.06476	561.1
0.0648	562.1
0.06484	562.5
0.06488	561.1
0.06492	563.3
0.06496	559.4
0.065	564.3
0.06504	558
0.06508	564.6
0.06512	556.6
0.06516	564.6
0.0652	556
0.06524	563.8
0.06528	556.1
0.06532	562.9
0.06536	556.2
0.0654	562.6
0.06544	557
0.06548	562.3
0.06552	557.8
0.06556	562.2
0.0656	558.4
0.06564	562.4
0.06568	559.4
0.06572	562.4
0.06576	559.9
0.0658	562.9
0.06584	560.5
0.06588	562.8
0.06592	561.2
0.06596	562.2
0.066	561.8
0.06604	561.1
0.06608	563.4
0.06612	559.3
0.06616	564.3
0.0662	558
0.06624	564.5
0.06628	556.6
0.06632	564.6
0.06636	555.7
0.0664	564
0.06644	556
0.06648	563.3
0.06652	556.2
0.06656	562.8
0.0666	556.9
0.06664	562.3
0.06668	557.7
0.06672	562.1
0.06676	558.7
0.0668	562.5
0.06684	558.7
0.06688	562.6
0.06692	559.7
0.06696	563
0.067	560.5
0.06704	563.1
0.06708	561
0.06712	562.4
0.06716	562
0.0672	560.7
0.06724	563.3
0.06728	559.8
0.06732	564
0.06736	558
0.0674	564.3
0.06744	556.9
0.06748	564.5
0.06752	556.1
0.06756	563.9
0.0676	555.8
0.06764	563.6
0.06768	555.9
0.06772	562.4
0.06776	557
0.0678	562.3
0.06784	557.8
0.06788	561.9
0.06792	558.2
0.06796	562.3
0.068	558.8
0.06804	562.6
0.06808	559.2
0.06812	562.8
0.06816	560.2
0.0682	562.8
0.06824	560.9
0.06828	562.2
0.06832	561.8
0.06836	561.2
0.0684	563
0.06844	559.7
0.06848	563.7
0.06852	558.3
0.06856	564.3
0.0686	557.2
0.06864	564.2
0.06868	556.2
0.06872	564.2
0.06876	555.7
0.0688	563.3
0.06884	556.1
0.06888	562.6
0.06892	556.7
0.06896	561.9
0.069	557.7
0.06904	562.1
0.06908	558.7
0.06912	562.4
0.06916	559.1
0.0692	562.6
0.06924	559.7
0.06928	562.9
0.06932	560.2
0.06936	562.8
0.0694	561
0.06944	562.2
0.06948	562
0.06952	561.3
0.06956	563.2
0.0696	559.5
0.06964	564.1
0.06968	558
0.06972	564.6
0.06976	556.7
0.0698	564.6
0.06984	556.1
0.06988	563.8
0.06992	555.8
0.06996	563.3
0.07	556.4
0.07004	562.8
0.07008	556.7
0.07012	562.5
0.07016	557.5
0.0702	562.2
0.07024	558.7
0.07028	562.5
0.07032	559.1
0.07036	562.6
0.0704	560.4
0.07044	563
0.07048	559.9
0.07052	562.8
0.07056	560.9
0.0706	562.5
0.07064	561.9
0.07068	561.4
0.07072	563.3
0.07076	559.7
0.0708	564.1
0.07084	558
0.07088	564.8
0.07092	556.9
0.07096	564.2
0.071	556.2
0.07104	564
0.07108	556
0.07112	563.2
0.07116	556.4
0.0712	562.6
0.07124	557
0.07128	562.5
0.07132	557.7
0.07136	562.2
0.0714	558.8
0.07144	562.2
0.07148	559.2
0.07152	562.7
0.07156	559.7
0.0716	563.2
0.07164	560.2
0.07168	562.9
0.07172	561.2
0.07176	562.1
0.0718	561.9
0.07184	561.4
0.07188	562.9
0.07192	559.6
0.07196	564.2
0.072	558.2
0.07204	564.5
0.07208	556.9
0.07212	564.4
0.07216	555.9
0.0722	564.1
0.07224	555.8
0.07228	563.8
0.07232	556
0.07236	562.6
0.0724	557
0.07244	562.3
0.07248	557.8
0.07252	562.2
0.07256	558.4
0.0726	562.5
0.07264	559.2
0.07268	562.9
0.07272	559.7
0.07276	562.9
0.0728	560.1
0.07284	562.9
0.07288	561.3
0.07292	562.5
0.07296	562.1
0.073	561.2
0.07304	563.2
0.07308	559.7
0.07312	563.9
0.07316	558.2
0.0732	564.5
0.07324	557
0.07328	564.3
0.07332	556.4
0.07336	564
0.0734	556.1
0.07344	566.6
0.07348	556.2
0.07352	562.9
0.07356	557.3
0.0736	562.3
0.07364	558
0.07368	562.2
0.07372	558.5
0.07376	562.6
0.0738	559.2
0.07384	562.8
0.07388	559.7
0.07392	563.3
0.07396	560.2
0.074	563
0.07404	561.2
0.07408	562.4
0.07412	562
0.07416	561.5
0.0742	563
0.07424	559.7
0.07428	564
0.07432	558.4
0.07436	564.5
0.0744	557.6
0.07444	564.3
0.07448	556.2
0.07452	564.2
0.07456	555.8
0.0746	563.8
0.07464	556.2
0.07468	562.9
0.07472	556.8
0.07476	562.2
0.0748	557.7
0.07484	562.2
0.07488	558.6
0.07492	562.3
0.07496	559.1
0.075	562.6
0.07504	559.7
0.07508	563.1
0.07512	560.1
0.07516	563.2
0.0752	561.2
0.07524	562.6
0.07528	561.8
0.07532	561.3
0.07536	563.2
0.0754	560.3
0.07544	564
0.07548	558.5
0.07552	564.6
0.07556	557.3
0.0756	564.4
0.07564	556.4
0.07568	564.2
0.07572	556.2
0.07576	563.6
0.0758	556.3
0.07584	563.1
0.07588	556.4
0.07592	562.8
0.07596	557.8
0.076	562.1
0.07604	558.6
0.07608	562.6
0.07612	559.1
0.07616	562.4
0.0762	559.7
0.07624	563.3
0.07628	560
0.07632	563.2
0.07636	560.8
0.0764	562.9
0.07644	561.8
0.07648	561.8
0.07652	562.9
0.07656	560.5
0.0766	564.1
0.07664	558.8
0.07668	564.8
0.07672	557.4
0.07676	564.6
0.0768	556.4
0.07684	564.2
0.07688	555.9
0.07692	563.7
0.07696	556.3
0.077	562.9
0.07704	556.8
0.07708	562.7
0.07712	557.7
0.07716	562.4
0.0772	558.3
0.07724	562.5
0.07728	559.3
0.07732	562.5
0.07736	559.7
0.0774	563
0.07744	560
0.07748	563.1
0.07752	560.9
0.07756	562.8
0.0776	561.8
0.07764	562
0.07768	562.8
0.07772	560.8
0.07776	563.9
0.0778	559
0.07784	564.5
0.07788	557.6
0.07792	564.8
0.07796	556.6
0.078	564.5
0.07804	556.3
0.07808	563.9
0.07812	556.2
0.07816	563.1
0.0782	556.6
0.07824	562.6
0.07828	557.4
0.07832	562.2
0.07836	558.2
0.0784	562.2
0.07844	559.1
0.07848	562.6
0.07852	559.6
0.07856	563
0.0786	560.1
0.07864	563.3
0.07868	561
0.07872	562.8
0.07876	561.4
0.0788	561.9
0.07884	562.4
0.07888	560.7
0.07892	563.7
0.07896	559.3
0.079	564.4
0.07904	558
0.07908	564.6
0.07912	556.8
0.07916	564.5
0.0792	555.9
0.07924	563.9
0.07928	556.2
0.07932	563.4
0.07936	556.6
0.0794	562.7
0.07944	557.4
0.07948	562.4
0.07952	558
0.07956	562.3
0.0796	558.8
0.07964	562.8
0.07968	559.4
0.07972	563.3
0.07976	560.1
0.0798	563.1
0.07984	560.6
0.07988	563.1
0.07992	561.5
[truncated: 98,001 more rows]

## Sheet: Sheet1
		100	50
time	data	butfilt1	Strain
0.494	308.9	307.079	-5.14158
0.49404	305	307.025	-5.14049
0.49408	308.9	306.97	-5.13939
0.49412	305	306.914	-5.13828
0.49416	308.9	306.857	-5.13714
0.4942	305.1	306.8	-5.136
0.49424	308.9	306.742	-5.13484
0.49428	305.6	306.683	-5.13366
0.49432	309.2	306.624	-5.13247
0.49436	305.9	306.564	-5.13127
0.4944	308.8	306.503	-5.13005
0.49444	306.7	306.441	-5.12882
0.49448	307.8	306.379	-5.12758
0.49452	307.7	306.316	-5.12632
0.49456	306.4	306.252	-5.12504
0.4946	307.9	306.188	-5.12376
0.49464	305	306.123	-5.12246
0.49468	308.8	306.057	-5.12115
0.49472	303.8	305.991	-5.11982
0.49476	309	305.924	-5.11849
0.4948	302.8	305.857	-5.11714
0.49484	308.7	305.789	-5.11578
0.49488	302.1	305.72	-5.1144
0.49492	308.1	305.651	-5.11302
0.49496	301.7	305.581	-5.11162
0.495	307.4	305.511	-5.11022
0.49504	302	305.44	-5.1088
0.49508	306.9	305.369	-5.10737
0.49512	302.2	305.297	-5.10593
0.49516	306.4	305.224	-5.10448
0.4952	302.7	305.151	-5.10302
0.49524	306.2	305.078	-5.10155
0.49528	302.8	305.004	-5.10007
0.49532	306.4	304.929	-5.09858
0.49536	303	304.854	-5.09708
0.4954	306.8	304.779	-5.09558
0.49544	303.3	304.703	-5.09406
0.49548	306.7	304.627	-5.09253
0.49552	304	304.55	-5.09099
0.49556	305.9	304.472	-5.08945
0.4956	304.6	304.395	-5.0879
0.49564	304.7	304.317	-5.08633
0.49568	305.8	304.238	-5.08476
0.49572	303.4	304.159	-5.08318
0.49576	306.2	304.08	-5.0816
0.4958	301.9	304	-5.08
0.49584	306.7	303.92	-5.0784
0.49588	300.8	303.84	-5.07679
0.49592	306.3	303.759	-5.07517
0.49596	300.3	303.677	-5.07355
0.496	305.8	303.596	-5.07192
0.49604	299.4	303.514	-5.07028
0.49608	305.5	303.432	-5.06864
0.49612	299.6	303.349	-5.06699
0.49616	304.5	303.266	-5.06533
0.4962	299.7	303.183	-5.06367
0.49624	304.6	303.1	-5.062
0.49628	300.1	303.016	-5.06032
0.49632	304.1	302.932	-5.05864
0.49636	300.4	302.848	-5.05696
0.4964	303.9	302.763	-5.05527
0.49644	300.9	302.678	-5.05357
0.49648	304.3	302.593	-5.05187
0.49652	300.8	302.508	-5.05016
0.49656	304.3	302.422	-5.04845
0.4966	301.3	302.337	-5.04673
0.49664	304	302.251	-5.04501
0.49668	301.6	302.164	-5.04328
0.49672	303.2	302.078	-5.04155
0.49676	302.3	301.991	-5.03982
0.4968	301.8	301.904	-5.03808
0.49684	303.7	301.817	-5.03633
0.49688	300.3	301.729	-5.03459
0.49692	304.1	301.642	-5.03283
0.49696	298.7	301.554	-5.03108
0.497	304.4	301.466	-5.02932
0.49704	298.1	301.378	-5.02756
0.49708	303.8	301.289	-5.02579
0.49712	297.5	301.201	-5.02402
0.49716	303.1	301.112	-5.02224
0.4972	297.3	301.023	-5.02047
0.49724	302.6	300.934	-5.01869
0.49728	297.3	300.845	-5.01691
0.49732	302.1	300.756	-5.01512
0.49736	297.8	300.667	-5.01333
0.4974	301.3	300.577	-5.01154
0.49744	297.9	300.488	-5.00975
0.49748	301.9	300.398	-5.00796
0.49752	298.1	300.308	-5.00616
0.49756	301.7	300.218	-5.00436
0.4976	298.1	300.128	-5.00256
0.49764	301.8	300.038	-5.00075
0.49768	299	299.947	-4.99894
0.49772	301.8	299.857	-4.99714
0.49776	298.9	299.766	-4.99532
0.4978	301.2	299.676	-4.99351
0.49784	299.8	299.585	-4.9917
0.49788	300.1	299.494	-4.98988
0.49792	300.5	299.403	-4.98806
0.49796	299	299.312	-4.98624
0.498	301.2	299.221	-4.98442
0.49804	297.5	299.13	-4.98259
0.49808	301.5	299.038	-4.98077
0.49812	296.1	298.947	-4.97894
0.49816	301.6	298.856	-4.97712
0.4982	295.1	298.764	-4.97529
0.49824	301.3	298.673	-4.97346
0.49828	294.9	298.581	-4.97162
0.49832	300.5	298.49	-4.96979
0.49836	294.5	298.398	-4.96796
0.4984	299.9	298.306	-4.96613
0.49844	294.7	298.215	-4.96429
0.49848	299.5	298.123	-4.96246
0.49852	295.1	298.031	-4.96062
0.49856	299.1	297.939	-4.95878
0.4986	295.5	297.847	-4.95694
0.49864	299	297.755	-4.95511
0.49868	295.7	297.663	-4.95327
0.49872	299.4	297.571	-4.95143
0.49876	296	297.48	-4.94959
0.4988	299.4	297.388	-4.94775
0.49884	296.5	297.295	-4.94591
0.49888	298.9	297.203	-4.94407
0.49892	296.8	297.111	-4.94223
0.49896	297.9	297.019	-4.94039
0.499	297.8	296.927	-4.93854
0.49904	296.7	296.835	-4.9367
0.49908	298.5	296.743	-4.93486
0.49912	295.4	296.651	-4.93301
0.49916	299	296.559	-4.93117
0.4992	294.3	296.466	-4.92933
0.49924	299.1	296.374	-4.92748
0.49928	293	296.282	-4.92564
0.49932	298.9	296.19	-4.9238
0.49936	292.4	296.098	-4.92195
0.4994	298.3	296.005	-4.92011
0.49944	292	295.913	-4.91827
0.49948	297.7	295.821	-4.91642
0.49952	292	295.729	-4.91458
0.49956	297.1	295.637	-4.91274
0.4996	292.4	295.545	-4.91089
0.49964	296.6	295.453	-4.90905
0.49968	293	295.361	-4.90721
0.49972	296.5	295.268	-4.90537
0.49976	293.2	295.176	-4.90353
0.4998	296.8	295.084	-4.90169
0.49984	293.3	294.992	-4.89984
0.49988	296.5	294.9	-4.898
0.49992	293.4	294.808	-4.89616
0.49996	296.7	294.716	-4.89432
0.5	294.1	294.624	-4.89248
0.50004	296.5	294.532	-4.89064
0.50008	294.6	294.44	-4.8888
0.50012	295.1	294.348	-4.88696
0.50016	295.6	294.256	-4.88512
0.5002	293.5	294.164	-4.88329
0.50024	296.3	294.072	-4.88145
0.50028	292.3	293.98	-4.87961
0.50032	296.6	293.888	-4.87777
0.50036	291	293.797	-4.87593
0.5004	296.7	293.705	-4.87409
0.50044	290.2	293.613	-4.87225
0.50048	295.7	293.521	-4.87042
0.50052	290	293.429	-4.86858
0.50056	295.5	293.337	-4.86674
0.5006	289.7	293.245	-4.86491
0.50064	294.9	293.154	-4.86307
0.50068	289.7	293.062	-4.86124
0.50072	294.1	292.97	-4.8594
0.50076	290.2	292.878	-4.85757
0.5008	294.2	292.787	-4.85574
0.50084	290.4	292.695	-4.8539
0.50088	293.9	292.604	-4.85207
0.50092	290.5	292.512	-4.85024
0.50096	294.4	292.42	-4.84841
0.501	290.8	292.329	-4.84657
0.50104	294.1	292.237	-4.84474
0.50108	291.4	292.146	-4.84291
0.50112	293.7	292.054	-4.84108
0.50116	291.7	291.963	-4.83925
0.5012	293.3	291.871	-4.83742
0.50124	292.5	291.78	-4.83559
0.50128	291.7	291.688	-4.83376
0.50132	293.9	291.597	-4.83193
0.50136	290.3	291.505	-4.8301
0.5014	294	291.414	-4.82827
0.50144	288.9	291.322	-4.82644
0.50148	294.1	291.231	-4.82461
0.50152	287.9	291.139	-4.82278
0.50156	293.6	291.048	-4.82095
0.5016	287.5	290.956	-4.81913
0.50164	293.4	290.865	-4.8173
0.50168	287.4	290.773	-4.81547
0.50172	292.5	290.682	-4.81364
0.50176	287.3	290.591	-4.81181
0.5018	292	290.499	-4.80999
0.50184	287.7	290.408	-4.80816
0.50188	291.6	290.317	-4.80633
0.50192	287.5	290.225	-4.80451
0.50196	291.4	290.134	-4.80268
0.502	287.8	290.043	-4.80086
0.50204	291.5	289.951	-4.79903
0.50208	288.2	289.86	-4.7972
0.50212	291.8	289.769	-4.79538
0.50216	288.5	289.678	-4.79355
0.5022	292	289.586	-4.79173
0.50224	289.1	289.495	-4.7899
0.50228	291.3	289.404	-4.78807
0.50232	289.7	289.312	-4.78625
0.50236	289.8	289.221	-4.78442
0.5024	290.5	289.13	-4.7826
0.50244	288.6	289.038	-4.78077
0.50248	291	288.947	-4.77894
0.50252	287.1	288.856	-4.77712
0.50256	291.6	288.764	-4.77529
0.5026	285.7	288.673	-4.77346
0.50264	291.5	288.582	-4.77163
0.50268	285.4	288.49	-4.76981
0.50272	291	288.399	-4.76798
0.50276	284.7	288.308	-4.76615
0.5028	290.7	288.216	-4.76432
0.50284	284.4	288.125	-4.7625
0.50288	289.6	288.033	-4.76067
0.50292	285	287.942	-4.75884
0.50296	289.2	287.851	-4.75701
0.503	285.2	287.759	-4.75518
0.50304	289.4	287.668	-4.75336
0.50308	285.5	287.576	-4.75153
0.50312	288.8	287.485	-4.7497
0.50316	285.7	287.393	-4.74787
0.5032	289.3	287.302	-4.74604
0.50324	285.6	287.211	-4.74421
0.50328	289.8	287.119	-4.74238
0.50332	286.2	287.028	-4.74055
0.50336	289	286.936	-4.73872
0.5034	286.7	286.844	-4.73689
0.50344	288.1	286.753	-4.73506
0.50348	287.6	286.661	-4.73323
0.50352	286.5	286.57	-4.73139
0.50356	288.3	286.478	-4.72956
0.5036	285.5	286.386	-4.72773
0.50364	288.6	286.295	-4.72589
0.50368	284.1	286.203	-4.72406
0.50372	289.1	286.111	-4.72223
0.50376	283.3	286.02	-4.72039
0.5038	288.5	285.928	-4.71856
0.50384	282.3	285.836	-4.71672
0.50388	288.1	285.744	-4.71488
0.50392	282.2	285.652	-4.71305
0.50396	288	285.561	-4.71121
0.504	281.8	285.469	-4.70938
0.50404	286.7	285.377	-4.70754
0.50408	282.5	285.285	-4.7057
0.50412	286.8	285.193	-4.70386
0.50416	282.6	285.101	-4.70203
0.5042	286.3	285.009	-4.70019
0.50424	283	284.918	-4.69835
0.50428	286.4	284.826	-4.69651
0.50432	283.4	284.734	-4.69467
0.50436	286.5	284.642	-4.69284
0.5044	283.3	284.55	-4.691
0.50444	286.7	284.458	-4.68916
0.50448	283.8	284.366	-4.68732
0.50452	286.2	284.274	-4.68548
0.50456	284.5	284.182	-4.68363
0.5046	284.9	284.09	-4.68179
0.50464	285	283.998	-4.67995
0.50468	283.8	283.905	-4.67811
0.50472	286	283.813	-4.67626
0.50476	282.1	283.721	-4.67442
0.5048	286.7	283.629	-4.67258
0.50484	280.7	283.537	-4.67073
0.50488	286.7	283.444	-4.66889
0.50492	280	283.352	-4.66704
0.50496	285.9	283.26	-4.6652
0.505	279.8	283.168	-4.66335
0.50504	285.2	283.075	-4.66151
0.50508	279.7	282.983	-4.65966
0.50512	284.6	282.891	-4.65782
0.50516	279.5	282.799	-4.65597
0.5052	284.3	282.706	-4.65412
0.50524	279.8	282.614	-4.65228
0.50528	283.5	282.522	-4.65043
0.50532	280	282.429	-4.64859
0.50536	283.7	282.337	-4.64674
0.5054	279.9	282.245	-4.64489
0.50544	283.9	282.152	-4.64305
0.50548	280.5	282.06	-4.6412
0.50552	284	281.968	-4.63935
0.50556	281.3	281.875	-4.6375
0.5056	283.6	281.783	-4.63566
0.50564	281.5	281.69	-4.63381
0.50568	282.9	281.598	-4.63196
0.50572	282.3	281.506	-4.63011
0.50576	281.5	281.413	-4.62826
0.5058	283.2	281.321	-4.62641
0.50584	280.5	281.228	-4.62456
0.50588	283.6	281.136	-4.62271
0.50592	279.4	281.043	-4.62086
0.50596	283.7	280.951	-4.61901
0.506	277.8	280.858	-4.61716
0.50604	283.6	280.765	-4.61531
0.50608	277.2	280.673	-4.61346
0.50612	283	280.58	-4.61161
0.50616	276.8	280.488	-4.60975
0.5062	282.5	280.395	-4.6079
0.50624	276.7	280.303	-4.60605
0.50628	281.6	280.21	-4.6042
0.50632	277.1	280.117	-4.60235
0.50636	281.2	280.025	-4.60049
0.5064	277.4	279.932	-4.59864
0.50644	281.5	279.84	-4.59679
0.50648	277.7	279.747	-4.59494
0.50652	281.5	279.654	-4.59309
0.50656	277.4	279.562	-4.59123
0.5066	281.6	279.469	-4.58938
0.50664	278	279.376	-4.58753
0.50668	281.5	279.284	-4.58567
0.50672	278.3	279.191	-4.58382
0.50676	280.4	279.098	-4.58197
0.5068	279.2	279.006	-4.58011
0.50684	280	278.913	-4.57826
0.50688	279.9	278.82	-4.5764
0.50692	278.6	278.727	-4.57455
0.50696	281.2	278.635	-4.57269
0.507	277	278.542	-4.57084
0.50704	281.3	278.449	-4.56898
0.50708	276	278.356	-4.56713
0.50712	280.9	278.263	-4.56527
0.50716	275.1	278.171	-4.56341
0.5072	280.6	278.078	-4.56155
0.50724	274.4	277.985	-4.5597
0.50728	280.1	277.892	-4.55784
0.50732	274.3	277.799	-4.55598
0.50736	279.5	277.706	-4.55412
0.5074	274.2	277.613	-4.55227
0.50744	278.9	277.52	-4.55041
0.50748	274.9	277.428	-4.54855
0.50752	278.9	277.335	-4.54669
0.50756	275	277.242	-4.54483
0.5076	278.5	277.149	-4.54298
0.50764	275.2	277.056	-4.54112
0.50768	278.7	276.963	-4.53926
0.50772	275.5	276.87	-4.5374
0.50776	279	276.777	-4.53554
0.5078	275.6	276.684	-4.53368
0.50784	278.6	276.591	-4.53182
0.50788	276.3	276.498	-4.52996
0.50792	277.7	276.405	-4.5281
0.50796	276.8	276.312	-4.52623
0.508	276.7	276.219	-4.52437
0.50804	277.8	276.126	-4.52251
0.50808	275.1	276.032	-4.52065
0.50812	278.7	275.939	-4.51879
0.50816	274.1	275.846	-4.51692
0.5082	278.7	275.753	-4.51506
0.50824	272.7	275.66	-4.51319
0.50828	278.4	275.567	-4.51133
0.50832	272.1	275.473	-4.50947
0.50836	278	275.38	-4.5076
0.5084	271.7	275.287	-4.50574
0.50844	277.1	275.194	-4.50387
0.50848	271.7	275.1	-4.50201
0.50852	276.5	275.007	-4.50014
0.50856	272	274.914	-4.49828
0.5086	276.3	274.821	-4.49641
0.50864	272.1	274.727	-4.49455
0.50868	276	274.634	-4.49268
0.50872	272.4	274.541	-4.49081
0.50876	276.3	274.447	-4.48895
0.5088	272.6	274.354	-4.48708
0.50884	276.1	274.261	-4.48522
0.50888	273.1	274.167	-4.48335
0.50892	276.3	274.074	-4.48148
0.50896	273.2	273.981	-4.47962
0.509	275.7	273.887	-4.47775
0.50904	274.3	273.794	-4.47588
0.50908	274.6	273.701	-4.47401
0.50912	274.6	273.607	-4.47215
0.50916	273.3	273.514	-4.47028
0.5092	275.6	273.42	-4.46841
0.50924	272	273.327	-4.46654
0.50928	276.1	273.234	-4.46467
0.50932	270.7	273.14	-4.4628
0.50936	276.2	273.047	-4.46093
0.5094	269.6	272.953	-4.45906
0.50944	275.6	272.86	-4.45719
0.50948	269.2	272.766	-4.45532
0.50952	274.7	272.673	-4.45345
0.50956	269.1	272.579	-4.45159
0.5096	274.4	272.486	-4.44972
0.50964	269.2	272.392	-4.44785
0.50968	273.6	272.299	-4.44598
0.50972	269.5	272.205	-4.44411
0.50976	273.5	272.112	-4.44224
0.5098	269.9	272.019	-4.44037
0.50984	273.2	271.925	-4.4385
0.50988	269.8	271.832	-4.43663
0.50992	273.7	271.738	-4.43477
0.50996	270	271.645	-4.4329
0.51	273.4	271.552	-4.43103
0.51004	270.5	271.458	-4.42916
0.51008	273.1	271.365	-4.42729
0.51012	271.2	271.271	-4.42543
0.51016	272.4	271.178	-4.42356
0.5102	272.1	271.084	-4.42169
0.51024	271.3	270.991	-4.41982
0.51028	272.5	270.898	-4.41795
0.51032	270	270.804	-4.41609
0.51036	273.2	270.711	-4.41422
0.5104	268.1	270.617	-4.41235
0.51044	273.7	270.524	-4.41048
0.51048	267.5	270.431	-4.40861
0.51052	273.2	270.337	-4.40675
0.51056	266.8	270.244	-4.40488
0.5106	272.4	270.151	-4.40301
0.51064	266.3	270.057	-4.40115
0.51068	271.9	269.964	-4.39928
0.51072	266.6	269.871	-4.39741
0.51076	271.3	269.777	-4.39555
0.5108	267.1	269.684	-4.39368
0.51084	270.8	269.591	-4.39182
0.51088	267	269.498	-4.38996
0.51092	270.9	269.405	-4.38809
0.51096	267.3	269.311	-4.38623
0.511	270.9	269.218	-4.38436
0.51104	267.3	269.125	-4.3825
0.51108	270.9	269.032	-4.38064
0.51112	267.9	268.939	-4.37878
0.51116	270.7	268.846	-4.37691
0.5112	268.3	268.753	-4.37505
0.51124	270.2	268.66	-4.37319
0.51128	268.8	268.566	-4.37133
0.51132	269.5	268.473	-4.36947
0.51136	269.4	268.38	-4.36761
0.5114	268.1	268.287	-4.36575
0.51144	270.6	268.194	-4.36389
0.51148	266.2	268.101	-4.36203
0.51152	271.2	268.008	-4.36017
0.51156	264.7	267.915	-4.35831
0.5116	270.8	267.822	-4.35645
0.51164	264.1	267.729	-4.35459
0.51168	269.9	267.637	-4.35273
0.51172	264	267.544	-4.35087
0.51176	269.2	267.451	-4.34901
0.5118	263.9	267.358	-4.34716
0.51184	268.9	267.265	-4.3453
0.51188	264.2	267.172	-4.34345
0.51192	268.3	267.08	-4.34159
0.51196	264.1	266.987	-4.33974
0.512	268.2	266.894	-4.33788
0.51204	264.4	266.801	-4.33603
0.51208	268.2	266.709	-4.33418
0.51212	264.4	266.616	-4.33232
0.51216	268.6	266.524	-4.33047
0.5122	264.4	266.431	-4.32862
0.51224	268.6	266.338	-4.32677
0.51228	265.6	266.246	-4.32491
0.51232	267.8	266.153	-4.32306
0.51236	265.8	266.061	-4.32121
0.5124	267.4	265.968	-4.31936
0.51244	266.9	265.876	-4.31751
0.51248	265.9	265.783	-4.31566
0.51252	267.4	265.691	-4.31381
0.51256	264.5	265.598	-4.31196
0.5126	268.5	265.505	-4.31011
0.51264	263	265.413	-4.30826
0.51268	268.2	265.321	-4.30641
0.51272	262.5	265.228	-4.30456
0.51276	267.5	265.136	-4.30271
0.5128	261.6	265.043	-4.30086
0.51284	267.2	264.951	-4.29901
0.51288	261.7	264.858	-4.29717
0.51292	266.3	264.766	-4.29532
0.51296	261.7	264.673	-4.29347
0.513	266.1	264.581	-4.29162
0.51304	261.6	264.489	-4.28977
0.51308	266	264.396	-4.28793
0.51312	261.7	264.304	-4.28608
0.51316	265.3	264.212	-4.28423
0.5132	262.1	264.119	-4.28239
0.51324	265.6	264.027	-4.28054
0.51328	262.4	263.935	-4.27869
0.51332	265.6	263.842	-4.27685
0.51336	262.6	263.75	-4.275
0.5134	266.1	263.658	-4.27316
0.51344	263	263.565	-4.27131
0.51348	264.8	263.473	-4.26946
0.51352	264.3	263.381	-4.26762
0.51356	263.4	263.288	-4.26577
0.5136	265	263.196	-4.26392
0.51364	261.7	263.104	-4.26208
0.51368	265.4	263.011	-4.26023
0.51372	261.2	262.919	-4.25838
0.51376	265.5	262.827	-4.25653
0.5138	260	262.734	-4.25469
0.51384	265.8	262.642	-4.25284
0.51388	259.2	262.55	-4.25099
0.51392	264.8	262.457	-4.24914
0.51396	259	262.365	-4.2473
0.514	264	262.272	-4.24545
0.51404	259.1	262.18	-4.2436
0.51408	263.5	262.088	-4.24175
0.51412	259	261.995	-4.2399
0.51416	263.2	261.903	-4.23806
0.5142	259.5	261.81	-4.23621
0.51424	263.2	261.718	-4.23436
0.51428	259.5	261.626	-4.23251
0.51432	263.3	261.533	-4.23066
0.51436	259.8	261.441	-4.22881
0.5144	263.3	261.348	-4.22696
0.51444	260.2	261.256	-4.22511
0.51448	263.1	261.163	-4.22326
0.51452	260.5	261.071	-4.22141
0.51456	262.6	260.978	-4.21956
0.5146	261.1	260.885	-4.21771
0.51464	261.8	260.793	-4.21586
0.51468	262	260.7	-4.214
0.51472	260.4	260.608	-4.21215
0.51476	263	260.515	-4.2103
0.5148	258.8	260.422	-4.20844
0.51484	263.2	260.329	-4.20659
0.51488	257.7	260.237	-4.20473
0.51492	262.8	260.144	-4.20288
0.51496	257.2	260.051	-4.20102
0.515	262.3	259.958	-4.19917
0.51504	256.5	259.865	-4.19731
0.51508	262	259.773	-4.19545
0.51512	256.4	259.68	-4.1936
0.51516	261.2	259.587	-4.19174
0.5152	256.3	259.494	-4.18988
0.51524	260.7	259.401	-4.18802
0.51528	256.8	259.308	-4.18616
0.51532	260.7	259.215	-4.1843
0.51536	256.6	259.122	-4.18244
0.5154	260.6	259.029	-4.18058
0.51544	257.1	258.936	-4.17872
0.51548	260.5	258.843	-4.17686
0.51552	257.4	258.75	-4.175
0.51556	260.6	258.657	-4.17314
0.5156	257.5	258.564	-4.17128
0.51564	260.3	258.471	-4.16941
0.51568	258	258.377	-4.16755
0.51572	259.7	258.284	-4.16569
0.51576	258.8	258.191	-4.16382
0.5158	258.7	258.098	-4.16195
0.51584	259.7	258.004	-4.16009
0.51588	257.1	257.911	-4.15822
0.51592	260.3	257.818	-4.15635
0.51596	255.2	257.724	-4.15449
0.516	260.6	257.631	-4.15262
0.51604	254.5	257.537	-4.15075
0.51608	259.8	257.444	-4.14888
0.51612	254.1	257.35	-4.14701
0.51616	259.5	257.257	-4.14513
0.5162	253.7	257.163	-4.14326
0.51624	259.1	257.07	-4.14139
0.51628	253.7	256.976	-4.13952
0.51632	258.3	256.882	-4.13764
0.51636	253.6	256.788	-4.13577
0.5164	258	256.695	-4.1339
0.51644	254	256.601	-4.13202
0.51648	258	256.507	-4.13014
0.51652	254.2	256.413	-4.12827
0.51656	257.7	256.32	-4.12639
0.5166	254.7	256.226	-4.12451
0.51664	257.9	256.132	-4.12263
0.51668	254.7	256.038	-4.12075
0.51672	258	255.944	-4.11887
0.51676	255.2	255.85	-4.11699
0.5168	257.4	255.756	-4.11511
0.51684	255.5	255.661	-4.11323
0.51688	256.2	255.567	-4.11134
0.51692	257	255.473	-4.10946
0.51696	255.1	255.379	-4.10757
0.517	257.2	255.284	-4.10568
0.51704	253.8	255.19	-4.1038
0.51708	258.1	255.095	-4.10191
0.51712	252.7	255.001	-4.10001
0.51716	257.9	254.906	-4.09812
0.5172	251.6	254.811	-4.09623
0.51724	257.2	254.717	-4.09434
0.51728	251.1	254.622	-4.09244
0.51732	257	254.527	-4.09055
0.51736	251.1	254.432	-4.08865
0.5174	256.4	254.337	-4.08675
0.51744	251.2	254.243	-4.08485
0.51748	255.4	254.148	-4.08295
0.51752	251.4	254.052	-4.08105
0.51756	255.5	253.957	-4.07915
0.5176	252.1	253.862	-4.07724
0.51764	255.4	253.767	-4.07534
0.51768	251.6	253.672	-4.07343
0.51772	255.5	253.576	-4.07153
0.51776	251.9	253.481	-4.06962
0.5178	255.8	253.385	-4.06771
0.51784	252.1	253.29	-4.0658
0.51788	255.4	253.194	-4.06388
0.51792	253	253.099	-4.06197
0.51796	254.4	253.003	-4.06005
0.518	253.8	252.907	-4.05814
0.51804	253.3	252.811	-4.05622
0.51808	254.8	252.715	-4.0543
0.51812	251.7	252.619	-4.05238
0.51816	255.3	252.523	-4.05046
0.5182	250.2	252.427	-4.04853
0.51824	255.1	252.33	-4.04661
0.51828	249.7	252.234	-4.04468
0.51832	254.8	252.138	-4.04275
0.51836	248.8	252.041	-4.04083
0.5184	254.2	251.945	-4.0389
0.51844	248.2	251.848	-4.03696
0.51848	253.9	251.752	-4.03503
0.51852	248.1	251.655	-4.0331
0.51856	252.9	251.558	-4.03116
0.5186	248.7	251.461	-4.02923
0.51864	253.1	251.365	-4.02729
0.51868	248.8	251.268	-4.02535
0.51872	252.6	251.171	-4.02341
0.51876	249.5	251.074	-4.02147
0.5188	253	250.977	-4.01953
0.51884	249.2	250.88	-4.01759
0.51888	252.5	250.782	-4.01565
0.51892	249.8	250.685	-4.0137
0.51896	252.9	250.588	-4.01175
0.519	249.8	250.49	-4.00981
0.51904	251.8	250.393	-4.00786
0.51908	250.6	250.295	-4.00591
0.51912	250.9	250.198	-4.00396
0.51916	251.2	250.1	-4.002
0.5192	249.5	250.003	-4.00005
0.51924	252.1	249.905	-3.9981
0.51928	248.3	249.807	-3.99614
0.51932	252.7	249.709	-3.99418
0.51936	247	249.611	-3.99223
0.5194	252.2	249.513	-3.99027
0.51944	245.9	249.415	-3.98831
0.51948	251.5	249.317	-3.98634
0.51952	245.6	249.219	-3.98438
0.51956	250.8	249.121	-3.98242
0.5196	245.6	249.023	-3.98046
0.51964	250.4	248.925	-3.97849
0.51968	246	248.826	-3.97653
0.51972	250.1	248.728	-3.97456
0.51976	246.1	248.63	-3.97259
0.5198	249.9	248.531	-3.97062
0.51984	246	248.433	-3.96866
0.51988	250.3	248.334	-3.96669
0.51992	246.4	248.236	-3.96472
0.51996	250.2	248.137	-3.96274
0.52	246.3	248.039	-3.96077
0.52004	249.3	247.94	-3.9588
0.52008	247.3	247.841	-3.95682
0.52012	249.7	247.742	-3.95485
0.52016	247.9	247.644	-3.95287
0.5202	248.6	247.545	-3.95089
0.52024	249.1	247.446	-3.94891
0.52028	247.6	247.347	-3.94694
0.52032	249.4	247.248	-3.94495
0.52036	245.9	247.149	-3.94297
0.5204	249.8	247.05	-3.94099
0.52044	244.8	246.95	-3.93901
0.52048	249.8	246.851	-3.93702
0.52052	243.2	246.752	-3.93504
0.52056	249.5	246.653	-3.93305
0.5206	243	246.553	-3.93106
0.52064	248.4	246.454	-3.92908
0.52068	243	246.354	-3.92709
0.52072	248.4	246.255	-3.9251
0.52076	242.9	246.155	-3.92311
0.5208	247.6	246.056	-3.92112
0.52084	243.6	245.956	-3.91913
0.52088	246.9	245.857	-3.91714
0.52092	243.3	245.757	-3.91514
0.52096	247.4	245.658	-3.91315
0.521	243.4	245.558	-3.91116
0.52104	247.2	245.458	-3.90916
0.52108	243.8	245.359	-3.90717
0.52112	247.3	245.259	-3.90517
0.52116	244.1	245.159	-3.90318
0.5212	246.8	245.059	-3.90118
0.52124	244.8	244.959	-3.89918
0.52128	246.4	244.859	-3.89719
0.52132	245.5	244.759	-3.89519
0.52136	245	244.659	-3.89319
0.5214	246.5	244.559	-3.89119
0.52144	243.7	244.459	-3.88919
0.52148	246.5	244.359	-3.88719
0.52152	242	244.259	-3.88519
0.52156	247.3	244.159	-3.88318
0.5216	241	244.059	-3.88118
0.52164	246.4	243.959	-3.87918
0.52168	240.8	243.859	-3.87717
0.52172	245.7	243.758	-3.87517
0.52176	240.2	243.658	-3.87316
0.5218	245.3	243.558	-3.87116
0.52184	240	243.458	-3.86915
0.52188	245	243.357	-3.86715
0.52192	240	243.257	-3.86514
0.52196	244.6	243.157	-3.86314
0.522	241.2	243.057	-3.86113
0.52204	244.2	242.956	-3.85913
0.52208	240.6	242.856	-3.85712
0.52212	244.5	242.756	-3.85511
0.52216	240.8	242.655	-3.85311
0.5222	244.8	242.555	-3.8511
0.52224	240.9	242.455	-3.84909
0.52228	244.7	242.354	-3.84708
0.52232	241.3	242.254	-3.84507
0.52236	243.9	242.153	-3.84307
0.5224	242	242.053	-3.84106
0.52244	243.3	241.952	-3.83905
0.52248	243.3	241.852	-3.83704
0.52252	241.2	241.751	-3.83503
0.52256	243.8	241.651	-3.83302
0.5226	240	241.55	-3.83101
0.52264	244	241.45	-3.82899
0.52268	238.9	241.349	-3.82698
0.52272	244	241.249	-3.82497
0.52276	238	241.148	-3.82296
0.5228	243.3	241.047	-3.82095
0.52284	237.5	240.947	-3.81894
0.52288	243.1	240.846	-3.81692
0.52292	237.6	240.746	-3.81491
0.52296	242.3	240.645	-3.8129
0.523	237.7	240.544	-3.81089
0.52304	241.9	240.444	-3.80887
0.52308	237.3	240.343	-3.80686
0.52312	241.6	240.243	-3.80485
0.52316	238	240.142	-3.80284
0.5232	241.4	240.041	-3.80083
0.52324	238	239.941	-3.79881
0.52328	241.7	239.84	-3.7968
0.52332	238.3	239.739	-3.79479
0.52336	241.7	239.639	-3.79278
0.5234	239.1	239.538	-3.79076
0.52344	241.2	239.438	-3.78875
0.52348	239.5	239.337	-3.78674
0.52352	240.3	239.236	-3.78473
0.52356	239.5	239.136	-3.78271
0.5236	239.3	239.035	-3.7807
0.52364	240.5	238.934	-3.77869
0.52368	237.4	238.834	-3.77667
0.52372	241.4	238.733	-3.77466
0.52376	236.3	238.632	-3.77265
0.5238	241.4	238.532	-3.77064
0.52384	235.2	238.431	-3.76862
0.52388	241.1	238.33	-3.76661
0.52392	234.6	238.23	-3.7646
0.52396	240.4	238.129	-3.76258
0.524	234.4	238.029	-3.76057
0.52404	239.6	237.928	-3.75856
0.52408	234.6	237.827	-3.75655
0.52412	238.8	237.727	-3.75453
0.52416	234.7	237.626	-3.75252
0.5242	238.5	237.525	-3.75051
0.52424	235.1	237.425	-3.7485
0.52428	238.8	237.324	-3.74649
0.52432	235	237.224	-3.74448
0.52436	238.7	237.123	-3.74246
0.5244	235.4	237.023	-3.74045
0.52444	239	236.922	-3.73844
0.52448	235.7	236.822	-3.73643
0.52452	238.7	236.721	-3.73442
0.52456	236.5	236.62	-3.73241
0.5246	237.9	236.52	-3.7304
0.52464	237.1	236.419	-3.72838
0.52468	237	236.319	-3.72637
0.52472	237.9	236.218	-3.72436
0.52476	235.5	236.117	-3.72235
0.5248	238.4	236.017	-3.72033
0.52484	234.3	235.916	-3.71832
0.52488	238.5	235.815	-3.71631
0.52492	232.6	235.715	-3.7143
0.52496	238.2	235.614	-3.71228
0.525	232.3	235.514	-3.71027
0.52504	237.7	235.413	-3.70826
0.52508	231.9	235.312	-3.70624
0.52512	237	235.212	-3.70423
0.52516	232	235.111	-3.70222
0.5252	236.7	235.01	-3.7002
0.52524	232.2	234.91	-3.69819
0.52528	236.3	234.809	-3.69618
0.52532	232.5	234.708	-3.69416
0.52536	235.7	234.608	-3.69215
0.5254	232.2	234.507	-3.69014
0.52544	236.1	234.406	-3.68812
0.52548	232.8	234.305	-3.68611
0.52552	236.3	234.205	-3.6841
0.52556	232.8	234.104	-3.68208
0.5256	236.4	234.003	-3.68007
0.52564	233.3	233.903	-3.67805
0.52568	235.7	233.802	-3.67604
0.52572	233.7	233.701	-3.67402
0.52576	234.5	233.6	-3.67201
0.5258	234.6	233.5	-3.66999
0.52584	232.9	233.399	-3.66797
0.52588	235.7	233.298	-3.66596
0.52592	231.8	233.197	-3.66394
0.52596	236.1	233.096	-3.66192
0.526	230.4	232.995	-3.65991
0.52604	235.6	232.894	-3.65789
0.52608	229.8	232.794	-3.65587
0.52612	235.3	232.693	-3.65385
0.52616	229.1	232.592	-3.65184
0.5262	234.8	232.491	-3.64982
0.52624	228.9	232.39	-3.6478
0.52628	234	232.289	-3.64578
0.52632	228.7	232.188	-3.64376
0.52636	233.6	232.087	-3.64175
0.5264	229.3	231.986	-3.63973
0.52644	233.3	231.886	-3.63771
0.52648	229.7	231.785	-3.63569
0.52652	233.5	231.684	-3.63367
0.52656	229.6	231.583	-3.63166
0.5266	233.4	231.482	-3.62964
0.52664	230.1	231.381	-3.62762
0.52668	233.4	231.28	-3.6256
0.52672	230.5	231.179	-3.62358
0.52676	233.1	231.078	-3.62156
0.5268	230.7	230.977	-3.61954
0.52684	232.3	230.876	-3.61752
0.52688	231.5	230.775	-3.61551
0.52692	230.6	230.674	-3.61349
0.52696	232.3	230.573	-3.61147
0.527	229.3	230.472	-3.60945
0.52704	232.8	230.371	-3.60743
0.52708	228.1	230.27	-3.60541
0.52712	233.2	230.169	-3.60339
0.52716	227.2	230.068	-3.60137
0.5272	232.5	229.967	-3.59935
0.52724	226.5	229.866	-3.59733
0.52728	231.8	229.765	-3.59531
0.52732	226.2	229.664	-3.59329
0.52736	231.3	229.563	-3.59127
0.5274	226.2	229.462	-3.58925
0.52744	230.9	229.361	-3.58723
0.52748	226.1	229.26	-3.58521
0.52752	230.6	229.16	-3.58319
0.52756	226.5	229.059	-3.58117
0.5276	230.5	228.958	-3.57915
0.52764	227.1	228.857	-3.57713
0.52768	230.5	228.756	-3.57512
0.52772	227	228.655	-3.5731
0.52776	230.4	228.554	-3.57108
0.5278	227.3	228.453	-3.56906
0.52784	230.1	228.352	-3.56704
0.52788	228	228.251	-3.56503
0.52792	229.7	228.15	-3.56301
0.52796	228.6	228.049	-3.56099
0.528	228.4	227.949	-3.55897
0.52804	229.1	227.848	-3.55695
0.52808	227.5	227.747	-3.55493
0.52812	229.8	227.646	-3.55292
0.52816	225.7	227.545	-3.5509
0.5282	230	227.444	-3.54888
0.52824	224.4	227.343	-3.54686
0.52828	230.2	227.242	-3.54484
0.52832	224	227.141	-3.54283
0.52836	229.6	227.04	-3.54081
0.5284	223.5	226.94	-3.53879
0.52844	228.7	226.839	-3.53677
0.52848	223.4	226.738	-3.53476
0.52852	228.4	226.637	-3.53274
0.52856	223.6	226.536	-3.53072
0.5286	227.6	226.435	-3.52871
0.52864	223.9	226.335	-3.52669
0.52868	227.8	226.234	-3.52468
0.52872	223.9	226.133	-3.52266
0.52876	227.7	226.032	-3.52065
0.5288	224.3	225.932	-3.51863
0.52884	227.7	225.831	-3.51662
0.52888	224.3	225.73	-3.5146
0.52892	227.7	225.629	-3.51259
0.52896	224.9	225.529	-3.51057
0.529	227.5	225.428	-3.50856
0.52904	225.2	225.327	-3.50654
0.52908	226.2	225.226	-3.50453
0.52912	226.1	225.126	-3.50251
0.52916	224.8	225.025	-3.5005
0.5292	227	224.924	-3.49849
0.52924	223.7	224.824	-3.49647
0.52928	227.2	224.723	-3.49446
0.52932	222.4	224.622	-3.49244
0.52936	227.4	224.521	-3.49043
0.5294	221.8	224.421	-3.48842
0.52944	226.5	224.32	-3.4864
0.52948	220.8	224.219	-3.48439
0.52952	226.2	224.119	-3.48238
0.52956	220.4	224.018	-3.48036
0.5296	225.6	223.918	-3.47835
0.52964	220.7	223.817	-3.47634
0.52968	225	223.716	-3.47433
0.52972	220.8	223.616	-3.47232
0.52976	224.9	223.515	-3.47031
0.5298	220.9	223.415	-3.4683
0.52984	225.2	223.314	-3.46629
0.52988	221.2	223.214	-3.46428
0.52992	224.7	223.113	-3.46227
0.52996	221.5	223.013	-3.46026
0.53	225	222.913	-3.45825
0.53004	222	222.812	-3.45624
0.53008	224.7	222.712	-3.45424
0.53012	222.4	222.611	-3.45223
0.53016	223.7	222.511	-3.45022
0.5302	223.2	222.411	-3.44821
0.53024	223	222.31	-3.4462
0.53028	223.8	222.21	-3.4442
0.53032	220.9	222.109	-3.44219
0.53036	224.8	222.009	-3.44018
0.5304	219.4	221.909	-3.43818
0.53044	224.7	221.808	-3.43617
0.53048	218.9	221.708	-3.43416
0.53052	224.1	221.608	-3.43216
0.53056	218.3	221.508	-3.43015
0.5306	223.4	221.407	-3.42815
0.53064	217.6	221.307	-3.42614
0.53068	222.8	221.207	-3.42414
0.53072	217.8	221.107	-3.42213
0.53076	222.6	221.006	-3.42013
0.5308	218.2	220.906	-3.41813
0.53084	222.5	220.806	-3.41612
0.53088	218	220.706	-3.41412
0.53092	222	220.606	-3.41212
0.53096	218.6	220.506	-3.41012
0.531	222.2	220.406	-3.40812
0.53104	218.4	220.306	-3.40612
0.53108	222.4	220.206	-3.40412
0.53112	219.2	220.106	-3.40212
0.53116	222.1	220.006	-3.40012
0.5312	219.3	219.906	-3.39812
0.53124	221.4	219.806	-3.39612
0.53128	220.2	219.706	-3.39412
0.53132	220.5	219.606	-3.39212
0.53136	220.8	219.506	-3.39012
0.5314	218.9	219.406	-3.38812
0.53144	221.6	219.306	-3.38612
0.53148	217.3	219.206	-3.38413
0.53152	221.7	219.106	-3.38213
0.53156	216.3	219.007	-3.38013
0.5316	221.8	218.907	-3.37813
0.53164	215.7	218.807	-3.37614
0.53168	221	218.707	-3.37414
0.53172	215.1	218.607	-3.37214
0.53176	220.5	218.507	-3.37015
0.5318	215.2	218.408	-3.36815
0.53184	220.1	218.308	-3.36616
0.53188	215.4	218.208	-3.36416
0.53192	219.2	218.109	-3.36217
0.53196	215.1	218.009	-3.36018
0.532	219.5	217.909	-3.35818
0.53204	215.7	217.81	-3.35619
0.53208	219.4	217.71	-3.3542
0.53212	215.7	217.61	-3.35221
0.53216	219.4	217.511	-3.35022
0.5322	215.8	217.411	-3.34823
0.53224	219.3	217.312	-3.34624
0.53228	216.5	217.212	-3.34424
0.53232	218.8	217.113	-3.34225
0.53236	217.1	217.013	-3.34026
0.5324	217.7	216.914	-3.33828
0.53244	218	216.814	-3.33629
0.53248	216.4	216.715	-3.3343
0.53252	218.4	216.615	-3.33231
0.53256	215.3	216.516	-3.33032
0.5326	218.8	216.417	-3.32833
0.53264	214	216.317	-3.32634
0.53268	219	216.218	-3.32436
0.53272	213	216.118	-3.32237
0.53276	218.8	216.019	-3.32038
0.5328	212.6	215.92	-3.31839
0.53284	217.9	215.82	-3.31641
0.53288	212	215.721	-3.31442
0.53292	217.3	215.622	-3.31244
0.53296	212.2	215.523	-3.31045
0.533	217	215.423	-3.30847
0.53304	212.4	215.324	-3.30648
0.53308	216.6	215.225	-3.3045
0.53312	212.8	215.126	-3.30252
0.53316	216.3	215.027	-3.30053
0.5332	212.5	214.928	-3.29855
0.53324	216.8	214.828	-3.29657
0.53328	213	214.729	-3.29459
0.53332	216.6	214.63	-3.2926
0.53336	213.3	214.531	-3.29062
0.5334	216.9	214.432	-3.28864
0.53344	213.9	214.333	-3.28666
0.53348	215.8	214.234	-3.28468
0.53352	214.5	214.135	-3.28269
0.53356	214.4	214.036	-3.28071
0.5336	215.9	213.936	-3.27873
0.53364	212.9	213.837	-3.27675
0.53368	216	213.738	-3.27477
0.53372	211.6	213.639	-3.27278
0.53376	216.1	213.54	-3.2708
0.5338	210.5	213.441	-3.26882
0.53384	216.1	213.342	-3.26684
0.53388	210.3	213.243	-3.26486
0.53392	215.5	213.144	-3.26287
0.53396	209.7	213.045	-3.26089
0.534	214.6	212.946	-3.25891
0.53404	209.4	212.846	-3.25693
0.53408	214.4	212.747	-3.25495
0.53412	209.8	212.648	-3.25297
0.53416	213.7	212.549	-3.25098
0.5342	210	212.45	-3.249
0.53424	213.8	212.351	-3.24702
0.53428	210.1	212.252	-3.24504
0.53432	213.8	212.153	-3.24306
0.53436	210.6	212.054	-3.24107
0.5344	214.2	211.955	-3.23909
0.53444	210.8	211.855	-3.23711
0.53448	213.7	211.756	-3.23513
0.53452	211.1	211.657	-3.23314
0.53456	213.1	211.558	-3.23116
0.5346	211.8	211.459	-3.22918
0.53464	211.9	211.36	-3.22719
0.53468	212.5	211.26	-3.22521
0.53472	210.7	211.161	-3.22322
0.53476	213.4	211.062	-3.22123
0.5348	209.6	210.962	-3.21925
0.53484	213.5	210.863	-3.21726
0.53488	208	210.764	-3.21527
0.53492	213.5	210.664	-3.21329
0.53496	207.2	210.565	-3.2113
0.535	212.9	210.465	-3.20931
0.53504	206.9	210.366	-3.20732
0.53508	212.2	210.267	-3.20533
0.53512	206.8	210.167	-3.20334
0.53516	211.3	210.068	-3.20135
0.5352	207.3	209.968	-3.19936
0.53524	211.2	209.869	-3.19737
0.53528	207.4	209.769	-3.19538
0.53532	211	209.669	-3.19339
0.53536	207.1	209.57	-3.1914
0.5354	211.1	209.47	-3.1894
0.53544	207.5	209.37	-3.18741
0.53548	211.3	209.271	-3.18542
0.53552	207.9	209.171	-3.18342
0.53556	211.2	209.071	-3.18143
0.5356	208	208.971	-3.17943
0.53564	210.8	208.872	-3.17743
0.53568	208.6	208.772	-3.17543
0.53572	209.9	208.672	-3.17344
0.53576	209.6	208.572	-3.17144
0.5358	208.5	208.472	-3.16944
0.53584	210.2	208.372	-3.16743
0.53588	207.1	208.272	-3.16543
0.53592	210.5	208.171	-3.16343
0.53596	206	208.071	-3.16143
0.536	210.6	207.971	-3.15942
0.53604	204.9	207.871	-3.15741
0.53608	210.2	207.77	-3.15541
0.53612	204.4	207.67	-3.1534
0.53616	209.9	207.57	-3.15139
0.5362	204.2	207.469	-3.14938
0.53624	209.2	207.369	-3.14737
0.53628	204	207.268	-3.14536
0.53632	208.7	207.168	-3.14335
0.53636	204.2	207.067	-3.14134
0.5364	208.4	206.966	-3.13932
0.53644	204.4	206.865	-3.13731
0.53648	208.1	206.765	-3.13529
0.53652	204.7	206.664	-3.13328
0.53656	208.2	206.563	-3.13126
0.5366	204.7	206.462	-3.12924
0.53664	209.1	206.361	-3.12722
0.53668	205.1	206.26	-3.1252
0.53672	208.3	206.159	-3.12318
0.53676	205.7	206.058	-3.12115
0.5368	207.5	205.956	-3.11913
0.53684	206.2	205.855	-3.1171
0.53688	206.6	205.754	-3.11508
0.53692	207.2	205.652	-3.11305
0.53696	205.1	205.551	-3.11102
0.537	207.9	205.449	-3.10898
0.53704	203.7	205.348	-3.10695
0.53708	208	205.246	-3.10492
0.53712	203	205.144	-3.10288
0.53716	207.8	205.042	-3.10084
0.5372	202	204.94	-3.09881
0.53724	207.4	204.838	-3.09677
0.53728	201.7	204.736	-3.09473
0.53732	206.8	204.634	-3.09269
0.53736	201.1	204.532	-3.09064
0.5374	205.9	204.43	-3.0886
0.53744	201.4	204.328	-3.08655
0.53748	205.6	204.225	-3.08451
0.53752	201.5	204.123	-3.08246
0.53756	205.4	204.021	-3.08041
0.5376	201.5	203.918	-3.07836
0.53764	205.5	203.815	-3.07631
0.53768	201.9	203.713	-3.07426
0.53772	205.6	203.61	-3.0722
0.53776	202.4	203.507	-3.07015
0.5378	205.6	203.405	-3.06809
0.53784	202.5	203.302	-3.06604
0.53788	205.1	203.199	-3.06398
0.53792	202.8	203.096	-3.06192
0.53796	204.3	202.993	-3.05986
0.538	204	202.89	-3.05779
0.53804	203	202.786	-3.05573
0.53808	204.5	202.683	-3.05366
0.53812	201.1	202.58	-3.0516
0.53816	205.2	202.477	-3.04953
0.5382	200.4	202.373	-3.04746
0.53824	205.1	202.27	-3.04539
0.53828	198.8	202.166	-3.04332
0.53832	204.7	202.062	-3.04125
0.53836	198.6	201.959	-3.03917
0.5384	203.7	201.855	-3.0371
0.53844	198.6	201.751	-3.03502
0.53848	203.3	201.647	-3.03295
0.53852	198.3	201.543	-3.03087
0.53856	202.9	201.44	-3.02879
0.5386	198.5	201.336	-3.02671
0.53864	202.9	201.232	-3.02463
0.53868	198.7	201.127	-3.02255
0.53872	202.4	201.023	-3.02047
0.53876	198.9	200.919	-3.01838
0.5388	202.8	200.815	-3.0163
0.53884	199.2	200.711	-3.01421
0.53888	202.5	200.606	-3.01213
0.53892	199.5	200.502	-3.01004
0.53896	202.3	200.398	-3.00795
0.539	199.8	200.293	-3.00586
0.53904	201.6	200.189	-3.00377
0.53908	200.9	200.084	-3.00168
0.53912	200.2	199.979	-2.99958
0.53916	201.1	199.875	-2.99749
0.5392	199.2	199.77	-2.9954
0.53924	201.9	199.665	-2.9933
0.53928	198.1	199.56	-2.9912
0.53932	202.1	199.455	-2.9891
0.53936	196.5	199.35	-2.987
0.5394	202.1	199.245	-2.9849
0.53944	196	199.14	-2.9828
0.53948	201.3	199.035	-2.9807
0.53952	195.6	198.93	-2.9786
0.53956	200.6	198.825	-2.97649
0.5396	195.2	198.719	-2.97439
0.53964	199.9	198.614	-2.97228
0.53968	195.7	198.509	-2.97018
0.53972	199.9	198.403	-2.96807
0.53976	195.9	198.298	-2.96596
0.5398	199.6	198.193	-2.96385
0.53984	196.2	198.087	-2.96174
0.53988	199.6	197.982	-2.95963
0.53992	196	197.876	-2.95752
0.53996	200.1	197.77	-2.95541
0.54	196.3	197.665	-2.9533
0.54004	199.4	197.559	-2.95118
0.54008	196.3	197.453	-2.94907
0.54012	199.2	197.348	-2.94695
0.54016	197.4	197.242	-2.94484
0.5402	198	197.136	-2.94272
0.54024	198.4	197.03	-2.9406
0.54028	196.8	196.924	-2.93848
0.54032	199.1	196.818	-2.93636
0.54036	195.1	196.712	-2.93424
0.5404	199.6	196.606	-2.93212
0.54044	194.1	196.5	-2.92999
0.54048	199	196.393	-2.92787
0.54052	193.1	196.287	-2.92575
0.54056	198.3	196.181	-2.92362
0.5406	192.6	196.075	-2.92149
0.54064	197.6	195.968	-2.91937
0.54068	192.3	195.862	-2.91724
0.54072	197.6	195.756	-2.91511
0.54076	192.6	195.649	-2.91298
0.5408	197	195.543	-2.91085
0.54084	192.6	195.436	-2.90872
0.54088	196.6	195.33	-2.90659
0.54092	192.9	195.223	-2.90446
0.54096	196.5	195.117	-2.90233
0.541	193.1	195.01	-2.9002
0.54104	196.8	194.903	-2.89807
0.54108	193.6	194.797	-2.89593
0.54112	196.7	194.69	-2.8938
0.54116	193.4	194.583	-2.89166
0.5412	196.5	194.476	-2.88953
0.54124	194.3	194.369	-2.88739
0.54128	195.6	194.262	-2.88525
0.54132	194.8	194.156	-2.88311
0.54136	194.3	194.049	-2.88097
0.5414	195.7	193.942	-2.87883
0.54144	192.7	193.834	-2.87669
0.54148	196.3	193.727	-2.87455
0.54152	191.7	193.62	-2.8724
0.54156	196.5	193.513	-2.87026
0.5416	190.5	193.406	-2.86811
0.54164	195.7	193.298	-2.86597
0.54168	189.9	193.191	-2.86382
0.54172	195.4	193.084	-2.86168
0.54176	189.6	192.976	-2.85953
0.5418	194.8	192.869	-2.85738
0.54184	189.9	192.762	-2.85523
0.54188	193.9	192.654	-2.85308
0.54192	189.9	192.547	-2.85093
0.54196	193.9	192.439	-2.84878
0.542	190.1	192.331	-2.84663
0.54204	193.7	192.224	-2.84448
0.54208	190.1	192.116	-2.84232
0.54212	194	192.008	-2.84017
0.54216	190.1	191.901	-2.83802
0.5422	193.8	191.793	-2.83586
0.54224	190.8	191.685	-2.83371
0.54228	193.4	191.577	-2.83155
0.54232	190.9	191.47	-2.82939
0.54236	193	191.362	-2.82723
0.5424	191.8	191.254	-2.82507
0.54244	191.9	191.146	-2.82292
0.54248	192.4	191.038	-2.82076
0.54252	190.6	190.93	-2.81859
0.54256	192.9	190.822	-2.81643
0.5426	189.3	190.714	-2.81427
0.54264	193.1	190.605	-2.81211
0.54268	188.3	190.497	-2.80994
0.54272	193	190.389	-2.80778
0.54276	187.1	190.281	-2.80561
0.5428	192.6	190.172	-2.80345
0.54284	186.9	190.064	-2.80128
0.54288	192	189.956	-2.79912
0.54292	186.5	189.848	-2.79695
0.54296	191.4	189.739	-2.79478
0.543	186.8	189.631	-2.79262
0.54304	191	189.523	-2.79045
0.54308	186.7	189.414	-2.78828
0.54312	190.4	189.306	-2.78611
0.54316	187.3	189.197	-2.78395
0.5432	190.4	189.089	-2.78178
0.54324	187.1	188.98	-2.77961
0.54328	190.5	188.872	-2.77744
0.54332	187.1	188.763	-2.77527
0.54336	190.9	188.655	-2.7731
0.5434	187.5	188.546	-2.77093
0.54344	190	188.438	-2.76876
0.54348	188.4	188.329	-2.76659
0.54352	189.6	188.221	-2.76441
0.54356	189.1	188.112	-2.76224
0.5436	187.6	188.004	-2.76007
0.54364	189.9	187.895	-2.7579
0.54368	186.7	187.786	-2.75572
0.54372	190	187.678	-2.75355
0.54376	185.4	187.569	-2.75138
0.5438	190.1	187.46	-2.7492
0.54384	184.5	187.352	-2.74703
0.54388	189.9	187.243	-2.74486
0.54392	183.7	187.134	-2.74268
0.54396	188.9	187.025	-2.74051
0.544	183.5	186.917	-2.73833
0.54404	188.6	186.808	-2.73616
0.54408	183.4	186.699	-2.73398
0.54412	188.2	186.59	-2.73181
0.54416	183.5	186.482	-2.72963
0.5442	187.5	186.373	-2.72746
0.54424	183.9	186.264	-2.72529
0.54428	187.4	186.156	-2.72311
0.54432	184.1	186.047	-2.72094
0.54436	187.4	185.938	-2.71876
0.5444	184.2	185.829	-2.71659
0.54444	187.8	185.721	-2.71441
0.54448	184.4	185.612	-2.71224
0.54452	187.8	185.503	-2.71006
0.54456	184.6	185.394	-2.70789
0.5446	186.7	185.286	-2.70571
0.54464	185.4	185.177	-2.70353
0.54468	185.7	185.068	-2.70136
0.54472	186.6	184.959	-2.69918
0.54476	184	184.85	-2.69701
0.5448	187.1	184.741	-2.69483
0.54484	183	184.633	-2.69265
0.54488	187.4	184.524	-2.69047
0.54492	181.8	184.415	-2.6883
0.54496	186.9	184.306	-2.68612
0.545	181.1	184.197	-2.68394
0.54504	186.3	184.088	-2.68176
0.54508	180.5	183.979	-2.67959
0.54512	185.7	183.87	-2.67741
0.54516	180.5	183.761	-2.67523
0.5452	185.3	183.653	-2.67305
0.54524	180.6	183.544	-2.67087
0.54528	184.6	183.435	-2.6687
0.54532	180.7	183.326	-2.66652
0.54536	184.9	183.217	-2.66434
0.5454	180.8	183.108	-2.66216
0.54544	184.7	182.999	-2.65998
0.54548	181	182.89	-2.6578
0.54552	184.6	182.781	-2.65563
0.54556	181.3	182.672	-2.65345
0.5456	184.5	182.563	-2.65127
0.54564	181.6	182.454	-2.64909
0.54568	184.3	182.345	-2.64691
0.54572	182.2	182.236	-2.64473
0.54576	183.2	182.127	-2.64255
0.5458	183.2	182.018	-2.64037
0.54584	181.9	181.909	-2.63819
0.54588	183.6	181.8	-2.63601
0.54592	180.4	181.691	-2.63382
0.54596	184.1	181.582	-2.63164
0.546	179.5	181.473	-2.62946
0.54604	184	181.364	-2.62728
0.54608	178.8	181.255	-2.6251
0.54612	183.5	181.146	-2.62291
0.54616	177.6	181.036	-2.62073
0.5462	183	180.927	-2.61855
0.54624	177.2	180.818	-2.61636
0.54628	182.7	180.709	-2.61418
0.54632	177.5	180.6	-2.612
0.54636	181.9	180.491	-2.60981
0.5464	177.6	180.381	-2.60763
0.54644	181.6	180.272	-2.60544
0.54648	177.7	180.163	-2.60326
0.54652	181.3	180.054	-2.60108
0.54656	178.2	179.945	-2.59889
0.5466	181.4	179.835	-2.59671
0.54664	178	179.726	-2.59452
0.54668	181.6	179.617	-2.59234
0.54672	178.3	179.507	-2.59015
0.54676	181.6	179.398	-2.58796
0.5468	178.7	179.289	-2.58578
0.54684	180.6	179.179	-2.58359
0.54688	179.8	179.07	-2.5814
0.54692	179.4	178.961	-2.57921
0.54696	180.2	178.851	-2.57703
0.547	178.1	178.742	-2.57484
0.54704	181	178.632	-2.57265
0.54708	176.8	178.523	-2.57046
0.54712	180.9	178.413	-2.56827
0.54716	176.1	178.304	-2.56608
0.5472	180.5	178.194	-2.56389
0.54724	174.7	178.085	-2.5617
0.54728	180	177.975	-2.55951
0.54732	174.4	177.866	-2.55731
0.54736	179.7	177.756	-2.55512
0.5474	174.3	177.646	-2.55293
0.54744	179.1	177.537	-2.55074
0.54748	174.4	177.427	-2.54854
0.54752	178.5	177.317	-2.54635
0.54756	174.6	177.208	-2.54416
0.5476	178.5	177.098	-2.54196
0.54764	175.1	176.988	-2.53977
0.54768	178.3	176.879	-2.53757
0.54772	175.1	176.769	-2.53538
0.54776	178.4	176.659	-2.53318
0.5478	175	176.549	-2.53098
0.54784	178.8	176.439	-2.52879
0.54788	175.5	176.329	-2.52659
0.54792	178.2	176.22	-2.52439
0.54796	176	176.11	-2.52219
0.548	177.2	176	-2.51999
0.54804	176.5	175.89	-2.51779
0.54808	175.5	175.779	-2.51559
0.54812	177.7	175.669	-2.51339
0.54816	174.3	175.559	-2.51118
0.5482	177.8	175.449	-2.50898
0.54824	172.7	175.339	-2.50678
0.54828	178.1	175.229	-2.50457
0.54832	172.2	175.118	-2.50236
0.54836	177.4	175.008	-2.50016
0.5484	171.7	174.897	-2.49795
0.54844	176.7	174.787	-2.49574
0.54848	171.4	174.677	-2.49353
0.54852	176.4	174.566	-2.49132
0.54856	171.4	174.456	-2.48911
0.5486	175.9	174.345	-2.4869
0.54864	171.3	174.234	-2.48469
0.54868	175.5	174.124	-2.48247
0.54872	171.8	174.013	-2.48026
0.54876	175.9	173.902	-2.47805
0.5488	171.9	173.791	-2.47583
0.54884	175.6	173.681	-2.47361
0.54888	172.2	173.57	-2.47139
0.54892	175.7	173.459	-2.46918
0.54896	172.3	173.348	-2.46696
0.549	175.5	173.237	-2.46473
0.54904	173.1	173.126	-2.46251
0.54908	174.6	173.014	-2.46029
0.54912	173.7	172.903	-2.45806
0.54916	173.6	172.792	-2.45584
0.5492	174.2	172.681	-2.45361
0.54924	171.9	172.569	-2.45138
0.54928	175	172.458	-2.44915
0.54932	171	172.346	-2.44692
0.54936	175.4	172.235	-2.44469
0.5494	169.7	172.123	-2.44246
0.54944	174.7	172.011	-2.44022
0.54948	168.8	171.899	-2.43799
0.54952	174.1	171.788	-2.43575
0.54956	168.7	171.676	-2.43352
0.5496	173.5	171.564	-2.43128
0.54964	168.4	171.452	-2.42904
0.54968	173.1	171.34	-2.4268
0.54972	168.3	171.228	-2.42456
0.54976	172.7	171.116	-2.42232
0.5498	168.7	171.004	-2.42008
0.54984	172.5	170.892	-2.41783
0.54988	168.6	170.779	-2.41559
0.54992	172.5	170.667	-2.41334
0.54996	168.7	170.555	-2.4111
0.55	172.3	170.443	-2.40885
0.55004	169.1	170.33	-2.40661
0.55008	172.4	170.218	-2.40436
0.55012	169.2	170.105	-2.40211
0.55016	171.8	169.993	-2.39986
0.5502	169.7	169.881	-2.39761
0.55024	171	169.768	-2.39536
0.55028	170.8	169.655	-2.39311
0.55032	169.6	169.543	-2.39086
0.55036	171.4	169.43	-2.3886
0.5504	168.4	169.317	-2.38635
0.55044	171.7	169.205	-2.3841
0.55048	167.1	169.092	-2.38184
0.55052	171.7	168.979	-2.37959
0.55056	166.1	168.866	-2.37733
0.5506	170.9	168.754	-2.37507
0.55064	165.4	168.641	-2.37282
0.55068	170.4	168.528	-2.37056
0.55072	165.2	168.415	-2.36831
0.55076	169.8	168.302	-2.36605
0.5508	165.2	168.19	-2.36379
0.55084	169.2	168.077	-2.36154
0.55088	165.2	167.964	-2.35928
0.55092	168.9	167.851	-2.35702
0.55096	165.1	167.738	-2.35477
0.551	169.2	167.625	-2.35251
0.55104	165.2	167.513	-2.35025
0.55108	169.6	167.4	-2.348
0.55112	165.5	167.287	-2.34574
0.55116	169	167.174	-2.34348
0.5512	166	167.061	-2.34123
0.55124	169	166.948	-2.33897
0.55128	166.2	166.836	-2.33671
0.55132	168.1	166.723	-2.33446
0.55136	167.4	166.61	-2.3322
0.5514	166.7	166.497	-2.32994
0.55144	168.1	166.384	-2.32769
0.55148	165.3	166.272	-2.32543
0.55152	168.3	166.159	-2.32317
0.55156	164.2	166.046	-2.32092
0.5516	168.3	165.933	-2.31866
0.55164	163.4	165.82	-2.31641
0.55168	167.9	165.708	-2.31415
0.55172	162.6	165.595	-2.3119
0.55176	167.5	165.482	-2.30964
0.5518	161.6	165.369	-2.30739
0.55184	167.1	165.257	-2.30514
0.55188	161.5	165.144	-2.30288
0.55192	167	165.031	-2.30063
0.55196	161.8	164.919	-2.29838
0.552	166.2	164.806	-2.29613
0.55204	162.4	164.694	-2.29388
0.55208	165.7	164.581	-2.29163
0.55212	162.4	164.469	-2.28938
0.55216	165.6	164.356	-2.28713
0.5522	162.8	164.244	-2.28488
0.55224	165.9	164.131	-2.28263
0.55228	162.7	164.019	-2.28038
0.55232	166.1	163.907	-2.27813
0.55236	163	163.794	-2.27589
0.5524	165.6	163.682	-2.27364
0.55244	163.4	163.57	-2.27139
0.55248	164.5	163.457	-2.26915
0.55252	164.5	163.345	-2.2669
0.55256	163	163.233	-2.26465
0.5526	165.1	163.121	-2.26241
0.55264	161.4	163.008	-2.26017
0.55268	165.6	162.896	-2.25792
0.55272	160.3	162.784	-2.25568
0.55276	165.2	162.672	-2.25344
0.5528	159.7	162.56	-2.25119
0.55284	164.9	162.448	-2.24895
0.55288	159	162.335	-2.24671
0.55292	164.4	162.223	-2.24447
0.55296	158.9	162.111	-2.24223
0.553	163.5	161.999	-2.23999
0.55304	158.9	161.888	-2.23775
0.55308	163.4	161.776	-2.23551
0.55312	158.8	161.664	-2.23328
0.55316	163.4	161.552	-2.23104
0.5532	158.4	161.44	-2.2288
0.55324	163.1	161.328	-2.22657
0.55328	159.1	161.217	-2.22433
0.55332	162.9	161.105	-2.2221
0.55336	159	160.993	-2.21987
0.5534	162.6	160.882	-2.21763
0.55344	159.5	160.77	-2.2154
0.55348	162.7	160.658	-2.21317
0.55352	160.2	160.547	-2.21094
0.55356	161.8	160.435	-2.20871
0.5536	160.7	160.324	-2.20648
0.55364	161.1	160.212	-2.20425
0.55368	161.3	160.101	-2.20202
0.55372	159.5	159.99	-2.19979
0.55376	162	159.878	-2.19756
0.5538	158.3	159.767	-2.19534
0.55384	161.8	159.655	-2.19311
0.55388	157.1	159.544	-2.19088
0.55392	162.1	159.433	-2.18866
0.55396	155.8	159.322	-2.18643
0.554	161.6	159.21	-2.18421
0.55404	155.5	159.099	-2.18198
0.55408	161.3	158.988	-2.17976
0.55412	155.5	158.877	-2.17754
0.55416	160.1	158.766	-2.17531
0.5542	155.8	158.655	-2.17309
0.55424	160	158.544	-2.17087
0.55428	156	158.433	-2.16865
0.55432	159.5	158.322	-2.16643
0.55436	156.2	158.211	-2.16421
0.5544	160	158.1	-2.16199
0.55444	155.9	157.989	-2.15978
0.55448	160.1	157.878	-2.15756
0.55452	156.2	157.767	-2.15534
0.55456	159.6	157.656	-2.15313
0.5546	156.8	157.546	-2.15091
0.55464	158.9	157.435	-2.14869
0.55468	157.3	157.324	-2.14648
0.55472	158.2	157.213	-2.14427
0.55476	158.4	157.103	-2.14205
0.5548	156.7	156.992	-2.13984
0.55484	158.8	156.881	-2.13762
0.55488	155.5	156.77	-2.13541
0.55492	158.9	156.66	-2.1332
0.55496	154.2	156.549	-2.13098
0.555	159	156.439	-2.12877
0.55504	153.5	156.328	-2.12656
0.55508	158.4	156.217	-2.12435
0.55512	153.2	156.107	-2.12214
0.55516	157.7	155.996	-2.11993
0.5552	152.5	155.886	-2.11772
0.55524	157.4	155.775	-2.11551
0.55528	152.6	155.665	-2.1133
0.55532	157.4	155.555	-2.11109
0.55536	152.5	155.444	-2.10888
0.5554	156.7	155.334	-2.10667
0.55544	152.8	155.223	-2.10447
0.55548	156.3	155.113	-2.10226
0.55552	153.4	155.003	-2.10005
0.55556	156.6	154.892	-2.09785
0.5556	153.2	154.782	-2.09564
0.55564	156.8	154.672	-2.09343
0.55568	153.2	154.561	-2.09123
0.55572	156.5	154.451	-2.08902
0.55576	154	154.341	-2.08682
0.5558	156	154.231	-2.08461
0.55584	154.8	154.12	-2.0824
0.55588	154.4	154.01	-2.0802
0.55592	155.5	153.9	-2.07799
0.55596	152.8	153.789	-2.07579
0.556	156.1	153.679	-2.07358
0.55604	151.7	153.569	-2.07138
0.55608	156.1	153.459	-2.06917
0.55612	150.4	153.348	-2.06696
0.55616	155.7	153.238	-2.06476
0.5562	150.1	153.128	-2.06255
0.55624	155	153.017	-2.06035
0.55628	149.7	152.907	-2.05814
0.55632	154.4	152.797	-2.05594
0.55636	149.9	152.687	-2.05373
0.5564	153.8	152.576	-2.05153
0.55644	149.7	152.466	-2.04932
0.55648	153.7	152.356	-2.04712
0.55652	149.4	152.246	-2.04491
0.55656	153.8	152.135	-2.04271
0.5566	149.5	152.025	-2.0405
0.55664	153.5	151.915	-2.0383
0.55668	150.3	151.804	-2.03609
0.55672	153.4	151.694	-2.03388
0.55676	150.8	151.584	-2.03168
0.5568	153.3	151.474	-2.02947
0.55684	150.8	151.363	-2.02727
0.55688	152.9	151.253	-2.02506
0.55692	151.5	151.143	-2.02285
0.55696	151.7	151.032	-2.02064
0.557	152.5	150.922	-2.01844
0.55704	150.3	150.811	-2.01623
0.55708	152.5	150.701	-2.01402
0.55712	149.1	150.59	-2.01181
0.55716	153.3	150.48	-2.0096
0.5572	147.6	150.369	-2.00739
0.55724	152.9	150.259	-2.00518
0.55728	147.2	150.148	-2.00297
0.55732	152.5	150.038	-2.00075
0.55736	146.9	149.927	-1.99854
0.5574	151.9	149.816	-1.99633
0.55744	146.6	149.706	-1.99412
0.55748	150.8	149.595	-1.9919
0.55752	146.9	149.484	-1.98969
0.55756	150.9	149.374	-1.98747
0.5576	146.8	149.263	-1.98526
0.55764	150.9	149.152	-1.98304
0.55768	146.8	149.041	-1.98083
0.55772	150.3	148.931	-1.97861
0.55776	147.1	148.82	-1.97639
0.5578	150.7	148.709	-1.97418
0.55784	147.4	148.598	-1.97196
0.55788	150.8	148.487	-1.96974
0.55792	147.5	148.376	-1.96752
0.55796	149.6	148.265	-1.9653
0.558	148.7	148.154	-1.96308
0.55804	148.8	148.043	-1.96086
0.55808	149.8	147.932	-1.95863
0.55812	147.5	147.82	-1.95641
0.55816	149.6	147.709	-1.95418
0.5582	146.3	147.598	-1.95196
0.55824	149.9	147.487	-1.94973
0.55828	145	147.375	-1.94751
0.55832	150	147.264	-1.94528
0.55836	144.3	147.152	-1.94305
0.5584	149.2	147.041	-1.94082
0.55844	143.6	146.93	-1.93859
0.55848	148.6	146.818	-1.93636
0.55852	143.9	146.706	-1.93413
0.55856	148	146.595	-1.9319
0.5586	143.6	146.483	-1.92967
0.55864	147.7	146.372	-1.92743
0.55868	143.6	146.26	-1.9252
0.55872	147.6	146.148	-1.92296
0.55876	143.8	146.036	-1.92073
0.5588	147.6	145.925	-1.91849
0.55884	144.1	145.813	-1.91626
0.55888	147.4	145.701	-1.91402
0.55892	144.2	145.589	-1.91178
0.55896	147.9	145.477	-1.90954
0.559	144.2	145.365	-1.9073
0.55904	147.2	145.253	-1.90506
0.55908	145.2	145.141	-1.90282
0.55912	146.3	145.029	-1.90058
0.55916	145.7	144.917	-1.89834
0.5592	145.1	144.805	-1.89609
0.55924	146.4	144.692	-1.89385
0.55928	143.4	144.58	-1.8916
0.55932	146.9	144.468	-1.88935
0.55936	142.3	144.355	-1.8871
0.5594	146.7	144.243	-1.88486
0.55944	141.5	144.13	-1.88261
0.55948	146.5	144.018	-1.88036
0.55952	140.8	143.905	-1.87811
0.55956	145.8	143.793	-1.87585
0.5596	140.4	143.68	-1.8736
0.55964	145.2	143.567	-1.87135
0.55968	140.7	143.455	-1.86909
0.55972	144.7	143.342	-1.86684
0.55976	140.6	143.229	-1.86458
0.5598	144.6	143.116	-1.86233
0.55984	140.7	143.004	-1.86007
0.55988	144.4	142.891	-1.85781
0.55992	141	142.778	-1.85556
0.55996	144.6	142.665	-1.8533
0.56	141.1	142.552	-1.85104
0.56004	144.7	142.439	-1.84878
0.56008	141.3	142.326	-1.84652
0.56012	144.2	142.213	-1.84426
0.56016	141.5	142.1	-1.84199
0.5602	143.6	141.986	-1.83973
0.56024	142.1	141.873	-1.83746
0.56028	142.5	141.76	-1.8352
0.56032	143.3	141.647	-1.83293
0.56036	140.9	141.533	-1.83067
0.5604	143.7	141.42	-1.8284
0.56044	139.4	141.307	-1.82613
0.56048	143.8	141.193	-1.82386
0.56052	138.8	141.08	-1.82159
0.56056	143.6	140.966	-1.81932
0.5606	137.8	140.853	-1.81705
0.56064	142.8	140.739	-1.81478
0.56068	137.5	140.626	-1.81251
0.56072	141.8	140.512	-1.81024
0.56076	137.2	140.398	-1.80797
0.5608	141.7	140.285	-1.80569
0.56084	137.3	140.171	-1.80342
0.56088	141.4	140.057	-1.80115
0.56092	137.6	139.944	-1.79887
0.56096	141.2	139.83	-1.7966
0.561	137.8	139.716	-1.79432
0.56104	141.3	139.602	-1.79205
0.56108	137.5	139.489	-1.78977
0.56112	141.8	139.375	-1.7875
0.56116	138.1	139.261	-1.78522
0.5612	140.8	139.147	-1.78294
0.56124	138.6	139.033	-1.78067
0.56128	140.5	138.919	-1.77839
0.56132	139.2	138.805	-1.77611
0.56136	139.4	138.692	-1.77383
0.5614	139.9	138.578	-1.77155
0.56144	138.1	138.464	-1.76927
0.56148	140.1	138.35	-1.76699
0.56152	137	138.236	-1.76471
0.56156	140.4	138.122	-1.76243
0.5616	135.1	138.008	-1.76015
0.56164	140.4	137.893	-1.75787
0.56168	134.7	137.779	-1.75559
0.56172	140	137.665	-1.75331
0.56176	133.9	137.551	-1.75102
0.5618	139.3	137.437	-1.74874
0.56184	134	137.323	-1.74646
0.56188	138.8	137.209	-1.74418
0.56192	134.3	137.095	-1.7419
0.56196	138.2	136.981	-1.73961
0.562	134.4	136.867	-1.73733
0.56204	137.9	136.752	-1.73505
0.56208	134.3	136.638	-1.73277
0.56212	138.1	136.524	-1.73048
0.56216	134.6	136.41	-1.7282
0.5622	138.1	136.296	-1.72592
0.56224	134.7	136.182	-1.72364
0.56228	138	136.068	-1.72135
0.56232	135.1	135.953	-1.71907
0.56236	137.5	135.839	-1.71678
0.5624	135.7	135.725	-1.7145
0.56244	136.4	135.611	-1.71222
0.56248	136.4	135.497	-1.70993
0.56252	135.3	135.382	-1.70765
0.56256	137.7	135.268	-1.70536
0.5626	133.6	135.154	-1.70307
0.56264	137.5	135.039	-1.70079
0.56268	132.6	134.925	-1.6985
0.56272	137.6	134.811	-1.69622
0.56276	132	134.696	-1.69393
0.5628	136.7	134.582	-1.69164
0.56284	131.3	134.468	-1.68936
0.56288	136.3	134.353	-1.68707
0.56292	131	134.239	-1.68478
0.56296	136	134.125	-1.68249
0.563	130.5	134.01	-1.68021
0.56304	135.5	133.896	-1.67792
0.56308	131.1	133.782	-1.67563
0.56312	134.9	133.667	-1.67334
0.56316	131.1	133.553	-1.67105
0.5632	135	133.438	-1.66877
0.56324	131.4	133.324	-1.66648
0.56328	135.1	133.209	-1.66419
0.56332	131.7	133.095	-1.6619
0.56336	135	132.98	-1.65961
0.5634	131.9	132.866	-1.65732
0.56344	134.7	132.751	-1.65503
0.56348	132.2	132.637	-1.65274
0.56352	134.6	132.522	-1.65045
0.56356	133.1	132.408	-1.64816
0.5636	132.7	132.293	-1.64586
0.56364	133.8	132.179	-1.64357
0.56368	131.2	132.064	-1.64128
0.56372	134.5	131.949	-1.63898
0.56376	129.6	131.835	-1.63669
0.5638	134.6	131.72	-1.6344
0.56384	128.9	131.605	-1.6321
0.56388	134.2	131.49	-1.62981
0.56392	128.1	131.376	-1.62751
0.56396	133.3	131.261	-1.62522
0.564	128.1	131.146	-1.62292
0.56404	132.5	131.031	-1.62063
0.56408	128.3	130.916	-1.61833
0.56412	132.1	130.802	-1.61603
0.56416	128.1	130.687	-1.61374
0.5642	132	130.572	-1.61144
0.56424	128.1	130.457	-1.60914
0.56428	131.9	130.342	-1.60685
0.56432	127.9	130.228	-1.60455
0.56436	132	130.113	-1.60225
0.5644	128.3	129.998	-1.59996
0.56444	132	129.883	-1.59766
0.56448	128.5	129.768	-1.59536
0.56452	131.6	129.653	-1.59306
0.56456	128.7	129.538	-1.59076
0.5646	131.4	129.423	-1.58846
0.56464	129.5	129.308	-1.58616
0.56468	130	129.193	-1.58386
0.56472	130.3	129.078	-1.58156
0.56476	128.4	128.963	-1.57926
0.5648	131.1	128.848	-1.57696
0.56484	127	128.733	-1.57466
0.56488	131.4	128.618	-1.57236
0.56492	126.2	128.503	-1.57006
0.56496	131	128.388	-1.56776
0.565	125	128.273	-1.56546
0.56504	130.5	128.158	-1.56315
0.56508	124.8	128.043	-1.56085
0.56512	129.8	127.928	-1.55855
0.56516	124.9	127.812	-1.55625
0.5652	128.9	127.697	-1.55395
0.56524	124.7	127.582	-1.55165
0.56528	129.1	127.467	-1.54934
0.56532	124.7	127.352	-1.54704
0.56536	128.6	127.237	-1.54474
0.5654	124.9	127.122	-1.54244
0.56544	128.6	127.007	-1.54014
0.56548	125.5	126.892	-1.53783
0.56552	128.8	126.777	-1.53553
0.56556	125.5	126.662	-1.53323
0.5656	128.6	126.546	-1.53093
0.56564	125.6	126.431	-1.52863
0.56568	128.1	126.316	-1.52632
0.56572	126.5	126.201	-1.52402
0.56576	127	126.086	-1.52172
0.5658	127.3	125.971	-1.51942
0.56584	125.4	125.856	-1.51711
0.56588	128.1	125.741	-1.51481
0.56592	124.5	125.625	-1.51251
0.56596	128.1	125.51	-1.51021
0.566	123	125.395	-1.5079
0.56604	127.8	125.28	-1.5056
0.56608	122.3	125.165	-1.5033
0.56612	127	125.05	-1.501
0.56616	121.9	124.935	-1.4987
0.5662	126.8	124.82	-1.4964
0.56624	121.2	124.705	-1.4941
0.56628	126.1	124.59	-1.49179
0.56632	121.3	124.475	-1.48949
0.56636	125.9	124.36	-1.4872
0.5664	121.4	124.245	-1.4849
0.56644	125.4	124.13	-1.4826
0.56648	121.7	124.015	-1.4803
0.56652	125.2	123.9	-1.478
0.56656	121.9	123.785	-1.4757
0.5666	125.1	123.67	-1.47341
0.56664	122.2	123.555	-1.47111
0.56668	125.4	123.441	-1.46881
0.56672	122.4	123.326	-1.46652
0.56676	124.8	123.211	-1.46422
0.5668	123.1	123.096	-1.46193
0.56684	124.1	122.982	-1.45963
0.56688	123.6	122.867	-1.45734
0.56692	123.3	122.752	-1.45504
0.56696	124.3	122.637	-1.45275
0.567	121.3	122.523	-1.45045
0.56704	124.8	122.408	-1.44816
0.56708	120.2	122.293	-1.44587
0.56712	124.7	122.179	-1.44357
0.56716	119.2	122.064	-1.44128
0.5672	124.5	121.949	-1.43899
0.56724	118.4	121.835	-1.4367
0.56728	123.7	121.72	-1.43441
0.56732	118.2	121.606	-1.43212
0.56736	122.8	121.491	-1.42983
0.5674	118.3	121.377	-1.42754
0.56744	122.5	121.262	-1.42525
0.56748	118.3	121.148	-1.42296
0.56752	122.3	121.034	-1.42067
0.56756	118.4	120.919	-1.41839
0.5676	122.5	120.805	-1.4161
0.56764	118.5	120.691	-1.41381
0.56768	122.3	120.576	-1.41153
0.56772	118.9	120.462	-1.40924
0.56776	122.4	120.348	-1.40696
0.5678	118.9	120.234	-1.40468
0.56784	121.8	120.12	-1.40239
0.56788	119.6	120.005	-1.40011
0.56792	121.5	119.891	-1.39783
0.56796	119.9	119.777	-1.39554
0.568	120.1	119.663	-1.39326
0.56804	121	119.549	-1.39098
0.56808	118.9	119.435	-1.3887
0.56812	121.1	119.321	-1.38641
0.56816	117.3	119.207	-1.38413
0.5682	122.2	119.093	-1.38185
0.56824	116.1	118.978	-1.37957
0.56828	121.6	118.864	-1.37729
0.56832	115.4	118.75	-1.37501
0.56836	120.6	118.636	-1.37273
0.5684	115.1	118.522	-1.37045
0.56844	120	118.408	-1.36817
0.56848	115.3	118.294	-1.36589
0.56852	119.4	118.18	-1.36361
0.56856	115.2	118.067	-1.36133
0.5686	119.2	117.953	-1.35905
0.56864	115.8	117.839	-1.35677
0.56868	119.3	117.725	-1.3545
0.56872	115.4	117.611	-1.35222
0.56876	119.2	117.497	-1.34994
0.5688	115.5	117.383	-1.34766
0.56884	119.5	117.269	-1.34538
0.56888	116	117.155	-1.34311
0.56892	119.1	117.041	-1.34083
0.56896	116.6	116.928	-1.33855
0.569	118.3	116.814	-1.33627
0.56904	117.2	116.7	-1.33399
0.56908	117.4	116.586	-1.33172
0.56912	117.8	116.472	-1.32944
0.56916	115.8	116.358	-1.32716
0.5692	118.4	116.244	-1.32488
0.56924	114.8	116.13	-1.3226
0.56928	118.7	116.016	-1.32032
0.56932	113.3	115.902	-1.31804
0.56936	118.3	115.788	-1.31576
0.5694	112.8	115.674	-1.31348
0.56944	117.6	115.56	-1.3112
0.56948	112.3	115.446	-1.30892
0.56952	117.1	115.332	-1.30664
0.56956	112.4	115.218	-1.30436
0.5696	116.5	115.104	-1.30208
0.56964	112	114.99	-1.2998
0.56968	116.4	114.876	-1.29752
0.56972	112.1	114.762	-1.29523
0.56976	115.7	114.648	-1.29295
0.5698	112.5	114.534	-1.29067
0.56984	115.9	114.419	-1.28839
0.56988	112.6	114.305	-1.28611
0.56992	115.9	114.191	-1.28383
0.56996	113.3	114.077	-1.28154
0.57	115.8	113.963	-1.27926
0.57004	112.9	113.849	-1.27698
0.57008	115.6	113.735	-1.27469
0.57012	113.6	113.62	-1.27241
0.57016	114.8	113.506	-1.27012
0.5702	114.2	113.392	-1.26784
0.57024	113.6	113.277	-1.26555
0.57028	114.9	113.163	-1.26326
0.57032	111.9	113.049	-1.26098
0.57036	114.9	112.934	-1.25869
0.5704	111.1	112.82	-1.2564
0.57044	115.8	112.706	-1.25411
0.57048	109.4	112.591	-1.25182
0.57052	115.2	112.477	-1.24953
0.57056	109.4	112.362	-1.24724
0.5706	114.4	112.248	-1.24495
0.57064	109.2	112.133	-1.24266
0.57068	113.5	112.018	-1.24037
0.57072	108.7	111.904	-1.23808
0.57076	113.2	111.789	-1.23578
0.5708	109.1	111.675	-1.23349
0.57084	113.1	111.56	-1.2312
0.57088	109.1	111.445	-1.22891
0.57092	112.7	111.331	-1.22661
0.57096	109.5	111.216	-1.22432
0.571	112.9	111.101	-1.22202
0.57104	109.6	110.986	-1.21973
0.57108	112.6	110.872	-1.21743
0.57112	109.9	110.757	-1.21513
0.57116	112.7	110.642	-1.21284
0.5712	110.1	110.527	-1.21054
0.57124	112	110.412	-1.20824
0.57128	111	110.297	-1.20594
0.57132	110.4	110.182	-1.20364
0.57136	111.8	110.067	-1.20134
0.5714	109.4	109.952	-1.19904
0.57144	112	109.837	-1.19674
0.57148	108.2	109.722	-1.19444
0.57152	112.1	109.607	-1.19214
0.57156	107.1	109.492	-1.18983
0.5716	111.7	109.377	-1.18753
0.57164	105.9	109.261	-1.18523
0.57168	111.5	109.146	-1.18292
0.57172	105.8	109.031	-1.18062
0.57176	110.9	108.916	-1.17831
0.5718	105.2	108.8	-1.17601
0.57184	110.2	108.685	-1.1737
0.57188	105.5	108.57	-1.1714
0.57192	109.7	108.455	-1.16909
0.57196	105.9	108.339	-1.16678
0.572	109.4	108.224	-1.16448
0.57204	106.4	108.108	-1.16217
0.57208	109.3	107.993	-1.15986
0.57212	106	107.878	-1.15755
0.57216	110	107.762	-1.15525
0.5722	106.3	107.647	-1.15294
0.57224	109.4	107.531	-1.15063
0.57228	107	107.416	-1.14832
0.57232	108.7	107.3	-1.14601
0.57236	107.6	107.185	-1.1437
0.5724	107.5	107.069	-1.14139
0.57244	108.3	106.954	-1.13907
0.57248	106.8	106.838	-1.13676
0.57252	108.7	106.722	-1.13445
0.57256	105.1	106.607	-1.13213
0.5726	109	106.491	-1.12982
0.57264	104	106.375	-1.12751
0.57268	108.6	106.26	-1.12519
0.57272	103	106.144	-1.12288
0.57276	108.3	106.028	-1.12056
0.5728	102.5	105.912	-1.11824
0.57284	107.7	105.796	-1.11593
0.57288	102.3	105.681	-1.11361
0.57292	107.1	105.565	-1.1113
0.57296	102.3	105.449	-1.10898
0.573	106.7	105.333	-1.10666
0.57304	102.5	105.217	-1.10434
0.57308	106.5	105.101	-1.10202
0.57312	102.8	104.985	-1.09971
0.57316	106.3	104.869	-1.09739
0.5732	103.3	104.753	-1.09507
0.57324	106.3	104.637	-1.09275
0.57328	103.2	104.521	-1.09043
0.57332	106.6	104.405	-1.08811
0.57336	103.5	104.289	-1.08578
0.5734	105.6	104.173	-1.08346
0.57344	104.3	104.057	-1.08114
0.57348	105.2	103.941	-1.07881
0.57352	104.7	103.825	-1.07649
0.57356	104	103.708	-1.07417
0.5736	105.3	103.592	-1.07184
0.57364	102.4	103.476	-1.06951
0.57368	105.7	103.359	-1.06719
0.57372	101.3	103.243	-1.06486
0.57376	106	103.127	-1.06253
0.5738	100.4	103.01	-1.0602
0.57384	105.4	102.894	-1.05787
0.57388	99.54	102.777	-1.05554
[truncated: 23,003 more rows]

## Sheet: Sheet2
0.5912	51.49	49.9782	0.000435162	0.000765519
0.59124	49.86	49.8524	0.00295285	0.0020503
0.59128	51.68	49.7265	0.00547064	0.00339632
0.59132	48.33	49.6006	0.00798849	0.0048051
0.59136	52.16	49.4747	0.0105063	0.0062782
0.5914	47.14	49.3488	0.013024	0.00781713
0.59144	52.02	49.2229	0.0155416	0.00942345
0.59148	45.89	49.0971	0.0180589	0.0110987
0.59152	51.73	48.9712	0.0205758	0.0128444
0.59156	45.56	48.8454	0.0230924	0.014662
0.5916	50.68	48.7196	0.0256085	0.0165532
0.59164	45.37	48.5938	0.028124	0.0185193
0.59168	49.72	48.4681	0.0306389	0.0205621
0.59172	45.56	48.3423	0.0331531	0.0226829
0.59176	49.72	48.2167	0.0356666	0.0248833
0.5918	45.6	48.091	0.0381792	0.0271648
0.59184	49.24	47.9654	0.0406911	0.0295288
0.59188	45.84	47.8399	0.0432021	0.0319768
0.59192	49.29	47.7144	0.0457122	0.0345103
0.59196	46.27	47.5889	0.0482213	0.0371306
0.592	49.34	47.4635	0.0507295	0.0398391
0.59204	46.04	47.3382	0.0532366	0.0426372
0.59208	49.53	47.2129	0.0557427	0.0455262
0.59212	46.47	47.0876	0.0582478	0.0485074
0.59216	49.05	46.9624	0.0607517	0.051582
0.5922	46.85	46.8373	0.0632544	0.0547513
0.59224	48	46.7122	0.0657559	0.0580164
0.59228	47.62	46.5872	0.0682561	0.0613785
0.59232	46.51	46.4623	0.0707549	0.0648386
0.59236	48.09	46.3374	0.0732523	0.0683979
0.5924	45.7	46.2126	0.0757481	0.0720573
0.59244	48.76	46.0879	0.0782423	0.0758178
0.59248	43.5	45.9633	0.0807348	0.0796803
0.59252	48.38	45.8387	0.0832254	0.0836456
0.59256	42.78	45.7143	0.0857141	0.0877145
0.5926	47.85	45.59	0.0882007	0.0918878
0.59264	42.25	45.4657	0.0906853	0.0961661
0.59268	47.14	45.3416	0.0931676	0.10055
0.59272	41.63	45.2176	0.0956476	0.105041
0.59276	46.56	45.0937	0.0981251	0.109638
0.5928	41.73	44.97	0.1006	0.114343
0.59284	46.23	44.8464	0.103073	0.119155
0.59288	42.06	44.7229	0.105543	0.124076
0.59292	45.37	44.5995	0.10801	0.129106
0.59296	41.87	44.4763	0.110474	0.134244
0.593	45.89	44.3532	0.112936	0.139492
0.59304	42.06	44.2302	0.115395	0.144849
0.59308	46.04	44.1074	0.117851	0.150315
0.59312	42.25	43.9848	0.120304	0.15589
0.59316	45.65	43.8623	0.122755	0.161575
0.5932	42.68	43.7399	0.125202	0.167368
0.59324	45.89	43.6177	0.127646	0.173271
0.59328	42.59	43.4956	0.130088	0.179283
0.59332	44.89	43.3737	0.132526	0.185403
0.59336	44.07	43.2519	0.134961	0.191631
0.5934	43.4	43.1303	0.137393	0.197967
0.59344	44.46	43.0089	0.139822	0.20441
0.59348	42.3	42.8876	0.142248	0.210961
0.59352	44.74	42.7665	0.14467	0.217618
0.59356	40.77	42.6456	0.147089	0.224381
0.5936	45.17	42.5248	0.149504	0.231248
0.59364	39.53	42.4042	0.151916	0.238219
0.59368	44.65	42.2838	0.154324	0.245293
0.59372	38.86	42.1636	0.156728	0.252469
0.59376	43.55	42.0436	0.159129	0.259745
0.5938	38.42	41.9237	0.161525	0.267121
0.59384	43.64	41.8041	0.163918	0.274593
0.59388	38.71	41.6847	0.166307	0.282162
0.59392	42.64	41.5654	0.168691	0.289825
0.59396	38.28	41.4464	0.171072	0.29758
0.594	42.35	41.3276	0.173448	0.305426
0.59404	38.23	41.209	0.17582	0.313359
0.59408	42.4	41.0906	0.178189	0.321378
0.59412	38.42	40.9724	0.180552	0.32948
0.59416	42.11	40.8544	0.182912	0.337662
0.5942	38.86	40.7366	0.185268	0.345921
0.59424	42.49	40.6191	0.187619	0.354255
0.59428	39.14	40.5017	0.189966	0.362659
0.59432	42.3	40.3846	0.192309	0.371131
0.59436	39.43	40.2676	0.194647	0.379667
0.5944	41.87	40.1509	0.196982	0.388264
0.59444	40.29	40.0344	0.199312	0.396918
0.59448	40.82	39.9181	0.201638	0.405625
0.59452	40.63	39.802	0.20396	0.414381
0.59456	39.33	39.6861	0.206278	0.423182
0.5946	41.68	39.5705	0.208591	0.432022
0.59464	37.85	39.455	0.2109	0.440897
0.59468	41.78	39.3398	0.213204	0.449801
0.59472	36.7	39.2248	0.215505	0.458729
0.59476	41.63	39.11	0.217801	0.467674
0.5948	35.74	38.9954	0.220092	0.476631
0.59484	41.01	38.8811	0.222379	0.485594
0.59488	35.41	38.767	0.224661	0.494555
0.59492	40.1	38.6531	0.226939	0.503509
0.59496	35.41	38.5394	0.229212	0.512449
0.595	39.53	38.426	0.23148	0.521368
0.59504	35.17	38.3128	0.233744	0.530259
0.59508	39.29	38.1999	0.236003	0.539113
0.59512	34.98	38.0871	0.238257	0.547924
0.59516	39.14	37.9746	0.240507	0.556682
0.5952	35.07	37.8624	0.242753	0.565379
0.59524	39.29	37.7503	0.244993	0.574006
0.59528	35.74	37.6385	0.24723	0.582553
0.59532	39.24	37.5269	0.249461	0.591011
0.59536	35.89	37.4156	0.251688	0.599368
0.5954	39.38	37.3044	0.253911	0.607615
0.59544	36.46	37.1935	0.25613	0.615741
0.59548	39	37.0828	0.258344	0.623735
0.59552	37.13	36.9723	0.260554	0.631586
0.59556	37.99	36.862	0.262759	0.639282
0.5956	37.71	36.752	0.26496	0.64681
0.59564	36.46	36.6421	0.267157	0.654162
0.59568	38.28	36.5325	0.26935	0.661324
0.59572	35.5	36.4231	0.271538	0.66829
0.59576	38.86	36.3139	0.273722	0.675053
0.5958	34.02	36.2049	0.275902	0.681607
0.59584	38.66	36.0961	0.278077	0.687952
0.59588	33.35	35.9876	0.280249	0.694089
0.59592	38.09	35.8792	0.282415	0.700021
0.59596	32.63	35.7711	0.284578	0.705755
0.596	37.71	35.6632	0.286736	0.711297
0.59604	32.3	35.5555	0.28889	0.716657
0.59608	37.04	35.4481	0.291039	0.721844
0.59612	32.25	35.3408	0.293184	0.726869
0.59616	36.75	35.2338	0.295324	0.731743
0.5962	32.06	35.127	0.297461	0.736476
0.59624	36.27	35.0204	0.299593	0.74108
0.59628	32.82	34.914	0.30172	0.745565
0.59632	36.03	34.8078	0.303843	0.74994
0.59636	33.11	34.7019	0.305962	0.754215
0.5964	36.7	34.5961	0.308077	0.758399
0.59644	33.3	34.4906	0.310188	0.762501
0.59648	36.7	34.3853	0.312294	0.76653
0.59652	33.35	34.2802	0.314397	0.770494
0.59656	36.46	34.1752	0.316495	0.7744
0.5966	34.12	34.0705	0.318589	0.778256
0.59664	34.98	33.966	0.320679	0.782069
0.59668	34.93	33.8617	0.322766	0.785846
0.59672	33.93	33.7576	0.324848	0.789592
0.59676	35.41	33.6537	0.326926	0.793314
0.5968	32.58	33.55	0.329	0.797017
0.59684	36.08	33.4465	0.33107	0.800705
0.59688	31.72	33.3432	0.333135	0.804383
0.59692	35.94	33.2402	0.335197	0.808052
0.59696	30.57	33.1373	0.337254	0.811716
0.597	35.89	33.0346	0.339308	0.815375
0.59704	30	32.9322	0.341357	0.819031
0.59708	34.93	32.8299	0.343401	0.822682
0.59712	29.57	32.7279	0.345442	0.826328
0.59716	34.36	32.6261	0.347478	0.829969
0.5972	29.62	32.5245	0.34951	0.833602
0.59724	33.69	32.4232	0.351537	0.837226
0.59728	29.62	32.322	0.35356	0.840839
0.59732	33.45	32.2211	0.355578	0.844439
0.59736	30.24	32.1204	0.357592	0.848022
0.5974	33.59	32.0199	0.359602	0.851586
0.59744	30.14	31.9196	0.361607	0.855127
0.59748	33.88	31.8196	0.363608	0.858643
0.59752	30.38	31.7198	0.365604	0.862129
0.59756	33.49	31.6202	0.367596	0.865584
0.5976	30.86	31.5208	0.369584	0.869005
0.59764	33.4	31.4216	0.371567	0.872392
0.59768	31.44	31.3227	0.373546	0.875744
0.59772	32.73	31.224	0.37552	0.879063
0.59776	31.82	31.1255	0.37749	0.882351
0.5978	31.87	31.0272	0.379455	0.885611
0.59784	32.58	30.9292	0.381416	0.888846
0.59788	30.24	30.8314	0.383372	0.892062
0.59792	33.11	30.7338	0.385324	0.895262
0.59796	29.14	30.6365	0.387271	0.89845
0.598	33.4	30.5394	0.389213	0.90163
0.59804	28.18	30.4425	0.39115	0.904805
0.59808	33.21	30.3459	0.393082	0.907979
0.59812	27.03	30.2495	0.39501	0.911153
0.59816	32.25	30.1534	0.396932	0.914328
0.5982	26.94	30.0575	0.398849	0.917506
0.59824	31.58	29.9619	0.400761	0.920686
0.59828	26.84	29.8666	0.402668	0.92387
0.59832	31.15	29.7715	0.40457	0.927058
0.59836	26.94	29.6767	0.406466	0.930251
0.5984	31.01	29.5822	0.408356	0.933448
0.59844	27.03	29.4879	0.410242	0.936651
0.59848	30.86	29.3939	0.412121	0.939862
0.59852	27.32	29.3002	0.413996	0.943083
0.59856	30.57	29.2068	0.415864	0.946318
0.5986	27.32	29.1136	0.417727	0.949572
0.59864	30.81	29.0208	0.419585	0.952848
0.59868	27.85	28.9282	0.421437	0.956153
0.59872	30.91	28.8358	0.423283	0.959492
0.59876	28.18	28.7438	0.425124	0.96287
0.5988	30.14	28.6521	0.426958	0.966294
0.59884	29.04	28.5606	0.428788	0.969767
0.59888	29.28	28.4695	0.430611	0.973295
0.59892	29.9	28.3786	0.432428	0.976881
0.59896	28.18	28.288	0.43424	0.980529
0.599	29.95	28.1977	0.436045	0.984241
0.59904	26.89	28.1078	0.437845	0.988018
0.59908	30.34	28.0181	0.439638	0.991861
0.59912	25.5	27.9287	0.441426	0.995771
0.59916	30.29	27.8397	0.443206	0.999747
0.5992	24.69	27.7509	0.444981	1.00379
0.59924	29.86	27.6625	0.446749	1.00789
0.59928	24.26	27.5745	0.448511	1.01206
0.59932	29.52	27.4867	0.450266	1.01628
0.59936	24.35	27.3993	0.452014	1.02057
0.5994	28.76	27.3122	0.453756	1.02491
0.59944	23.87	27.2254	0.455491	1.0293
0.59948	28.32	27.139	0.457219	1.03376
0.59952	24.35	27.053	0.45894	1.03826
0.59956	28.04	26.9673	0.460655	1.04282
0.5996	24.5	26.8819	0.462362	1.04744
0.59964	28.09	26.7969	0.464063	1.05212
0.59968	24.64	26.7122	0.465756	1.05686
0.59972	28.09	26.6279	0.467443	1.06166
0.59976	24.88	26.5439	0.469122	1.06652
0.5998	28.61	26.4603	0.470795	1.07146
0.59984	25.5	26.377	0.47246	1.07645
0.59988	28.47	26.2941	0.474119	1.08152
0.59992	26.27	26.2115	0.47577	1.08666
0.59996	27.42	26.1293	0.477415	1.09188
0.6	26.94	26.0474	0.479052	1.09716
0.60004	26.03	25.9659	0.480682	1.10252
0.60008	27.8	25.8848	0.482305	1.10795
0.60012	25.17	25.804	0.483921	1.11346
0.60016	27.85	25.7236	0.485529	1.11904
0.6002	23.63	25.6435	0.48713	1.1247
0.60024	28.28	25.5638	0.488723	1.13043
0.60028	22.72	25.4845	0.490309	1.13623
0.60032	27.89	25.4056	0.491888	1.14211
0.60036	22.39	25.3271	0.493459	1.14806
0.6004	27.46	25.2489	0.495022	1.15408
0.60044	22.2	25.1712	0.496577	1.16017
0.60048	26.75	25.0938	0.498124	1.16634
0.60052	21.77	25.0168	0.499664	1.17259
0.60056	26.17	24.9402	0.501195	1.17891
0.6006	22.25	24.8641	0.502719	1.18531
0.60064	25.64	24.7883	0.504234	1.19179
0.60068	22.05	24.7129	0.505742	1.19834
0.60072	25.93	24.638	0.507241	1.20498
0.60076	22.25	24.5634	0.508732	1.21169
0.6008	25.98	24.4893	0.510215	1.21849
0.60084	23.11	24.4155	0.51169	1.22536
0.60088	26.22	24.3422	0.513156	1.23231
0.60092	23.3	24.2693	0.514615	1.23933
0.60096	26.27	24.1967	0.516065	1.24643
0.601	23.68	24.1246	0.517507	1.2536
0.60104	25.17	24.0529	0.518941	1.26084
0.60108	24.16	23.9817	0.520367	1.26815
0.60112	24.5	23.9108	0.521784	1.27552
0.60116	25.45	23.8404	0.523193	1.28295
0.6012	23.01	23.7703	0.524593	1.29045
0.60124	26.03	23.7007	0.525986	1.29801
0.60128	21.77	23.6315	0.527369	1.30562
0.60132	26.51	23.5628	0.528744	1.31329
0.60136	20.86	23.4945	0.530111	1.32101
0.6014	26.03	23.4266	0.531469	1.32879
0.60144	20.38	23.3591	0.532818	1.33662
0.60148	25.5	23.2921	0.534158	1.34451
0.60152	19.9	23.2255	0.53549	1.35246
0.60156	24.78	23.1594	0.536812	1.36046
0.6016	19.9	23.0937	0.538126	1.36852
0.60164	24.26	23.0285	0.539431	1.37663
0.60168	20	22.9637	0.540726	1.38481
0.60172	24.26	22.8994	0.542013	1.39304
0.60176	20.43	22.8355	0.54329	1.40134
0.6018	24.02	22.7721	0.544559	1.40969
0.60184	20.86	22.7091	0.545818	1.4181
0.60188	24.3	22.6466	0.547068	1.42657
0.60192	21	22.5845	0.548309	1.43509
0.60196	24.64	22.5229	0.549541	1.44368
0.602	21.53	22.4618	0.550764	1.45231
0.60204	24.26	22.4011	0.551977	1.461
0.60208	22.05	22.3409	0.553181	1.46974
0.60212	23.83	22.2812	0.554377	1.47853
0.60216	22.72	22.2219	0.555562	1.48737
0.6022	23.06	22.1631	0.556739	1.49625
0.60224	23.39	22.1047	0.557906	1.50518
0.60228	21.67	22.0468	0.559064	1.51415
0.60232	24.26	21.9894	0.560213	1.52317
0.60236	20.43	21.9324	0.561352	1.53223
0.6024	24.73	21.876	0.562481	1.54133
0.60244	19.52	21.82	0.563601	1.55047
0.60248	24.45	21.7645	0.564711	1.55965
0.60252	18.7	21.7094	0.565811	1.56887
0.60256	23.59	21.6549	0.566902	1.57813
0.6026	18.46	21.6009	0.567982	1.58743
0.60264	23.15	21.5474	0.569053	1.59677
0.60268	17.99	21.4943	0.570114	1.60615
0.60272	22.72	21.4418	0.571164	1.61557
0.60276	18.13	21.3898	0.572204	1.62502
0.6028	22.1	21.3383	0.573235	1.6345
0.60284	18.46	21.2873	0.574254	1.64401
0.60288	22.58	21.2368	0.575264	1.65355
0.60292	19.04	21.1868	0.576264	1.66311
0.60296	22.44	21.1374	0.577253	1.6727
0.603	18.89	21.0884	0.578232	1.6823
0.60304	23.25	21.04	0.5792	1.69192
0.60308	19.09	20.9921	0.580159	1.70155
0.60312	23.01	20.9447	0.581107	1.7112
0.60316	19.85	20.8978	0.582045	1.72085
0.6032	22.29	20.8514	0.582972	1.73051
0.60324	20.95	20.8055	0.583889	1.74017
0.60328	21.81	20.7602	0.584796	1.74983
0.60332	22.01	20.7154	0.585693	1.7595
0.60336	20.52	20.671	0.586579	1.76916
0.6034	22.77	20.6273	0.587455	1.77883
0.60344	19.33	20.584	0.58832	1.78849
0.60348	23.15	20.5412	0.589175	1.79815
0.60352	18.37	20.499	0.59002	1.80781
0.60356	22.96	20.4573	0.590854	1.81746
0.6036	17.75	20.4161	0.591677	1.82711
0.60364	22.48	20.3755	0.59249	1.83675
0.60368	17.08	20.3354	0.593292	1.84639
0.60372	22.1	20.2958	0.594083	1.85602
0.60376	17.27	20.2568	0.594864	1.86564
0.6038	21.72	20.2183	0.595633	1.87525
0.60384	17.17	20.1804	0.596392	1.88486
0.60388	21.38	20.143	0.59714	1.89445
0.60392	17.55	20.1062	0.597876	1.90402
0.60396	21.53	20.0699	0.598602	1.91359
0.604	18.03	20.0341	0.599317	1.92313
0.60404	21.29	19.9989	0.600021	1.93266
0.60408	18.03	19.9643	0.600714	1.94218
0.60412	21.38	19.9302	0.601397	1.95167
0.60416	18.32	19.8966	0.602068	1.96114
0.6042	21.77	19.8636	0.602728	1.97059
0.60424	18.89	19.8311	0.603377	1.98001
0.60428	21.58	19.7992	0.604015	1.98941
0.60432	19.33	19.7679	0.604643	1.99878
0.60436	20.95	19.737	0.605259	2.00811
0.6044	20.47	19.7068	0.605865	2.0174
0.60444	19.8	19.6771	0.606459	2.02666
0.60448	21.53	19.6479	0.607042	2.03587
0.60452	18.42	19.6193	0.607615	2.04502
0.60456	21.96	19.5912	0.608176	2.05412
0.6046	17.17	19.5637	0.608726	2.06316
0.60464	22.1	19.5367	0.609265	2.07214
0.60468	16.69	19.5104	0.609793	2.08104
0.60472	21.81	19.4845	0.610309	2.08987
0.60476	16.31	19.4593	0.610815	2.09862
0.6048	21.14	19.4346	0.611308	2.10728
0.60484	16.02	19.4104	0.611791	2.11585
0.60488	20.43	19.3869	0.612262	2.12433
0.60492	16.02	19.3639	0.612722	2.13272
0.60496	20.43	19.3415	0.61317	2.141
0.605	16.12	19.3196	0.613607	2.14919
0.60504	20.14	19.2983	0.614033	2.15728
0.60508	16.84	19.2776	0.614447	2.16526
0.60512	20.43	19.2575	0.61485	2.17314
0.60516	17.41	19.2379	0.615242	2.18091
0.6052	21	19.2189	0.615622	2.18857
0.60524	17.7	19.2004	0.615991	2.19613
0.60528	21.19	19.1825	0.616349	2.20359
0.60532	18.27	19.1652	0.616696	2.21093
0.60536	20.81	19.1484	0.617031	2.21817
0.6054	18.89	19.1322	0.617356	2.2253
0.60544	20.24	19.1166	0.617669	2.23231
0.60548	19.56	19.1014	0.617971	2.23922
0.60552	19.61	19.0869	0.618262	2.24601
0.60556	20.57	19.0729	0.618543	2.25268
0.6056	18.66	19.0594	0.618812	2.25924
0.60564	21.19	19.0465	0.61907	2.26568
0.60568	17.03	19.0342	0.619317	2.272
0.60572	21.58	19.0224	0.619553	2.2782
0.60576	15.93	19.0111	0.619777	2.28426
0.6058	21.43	19.0004	0.619991	2.2902
0.60584	15.93	18.9903	0.620194	2.296
0.60588	20.86	18.9807	0.620385	2.30167
0.60592	15.54	18.9717	0.620566	2.30719
0.60596	20.47	18.9633	0.620735	2.31256
0.606	15.64	18.9553	0.620893	2.31779
0.60604	20.14	18.948	0.62104	2.32285
0.60608	15.59	18.9412	0.621176	2.32776
0.60612	19.9	18.935	0.621301	2.33251
0.60616	16.31	18.9293	0.621415	2.33708
0.6062	20.04	18.9241	0.621518	2.34148
0.60624	16.79	18.9195	0.62161	2.3457
0.60628	20.76	18.9154	0.621691	2.34975
0.60632	17.17	18.9119	0.621761	2.35361
0.60636	20.62	18.9089	0.621821	2.35728
0.6064	17.65	18.9065	0.62187	2.36075
0.60644	20.81	18.9046	0.621909	2.36404
0.60648	18.27	18.9032	0.621936	2.36713
0.60652	20.57	18.9023	0.621954	2.37002
0.60656	18.99	18.902	0.621961	2.37272
				2.37521
