# Supplementary material for: Shear Thickening Fluids in Cork Agglomerates: An Exploration of Advantages and Drawbacks
Source: Preprints.org preprint supplement (doi:10.20944/preprints202304.0004.v1), 2023-04-03
Supplement: Supplementary file 4 [file A10-report.pdf › Supplementary Material/SEM Images/10� STF/A10-report.pdf]

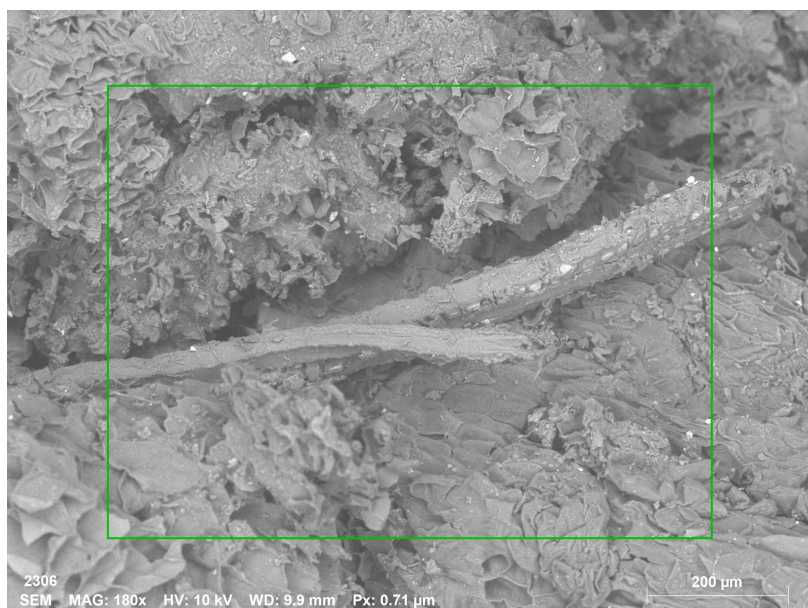

| Name | Date       | Time     | HV<br>[kV] | Mag  | WD<br>[mm] |
|------|------------|----------|------------|------|------------|
| 2306 | 27/07/2022 | 10:54:53 | 10.0 keV   | 180x | 9.9 mm     |

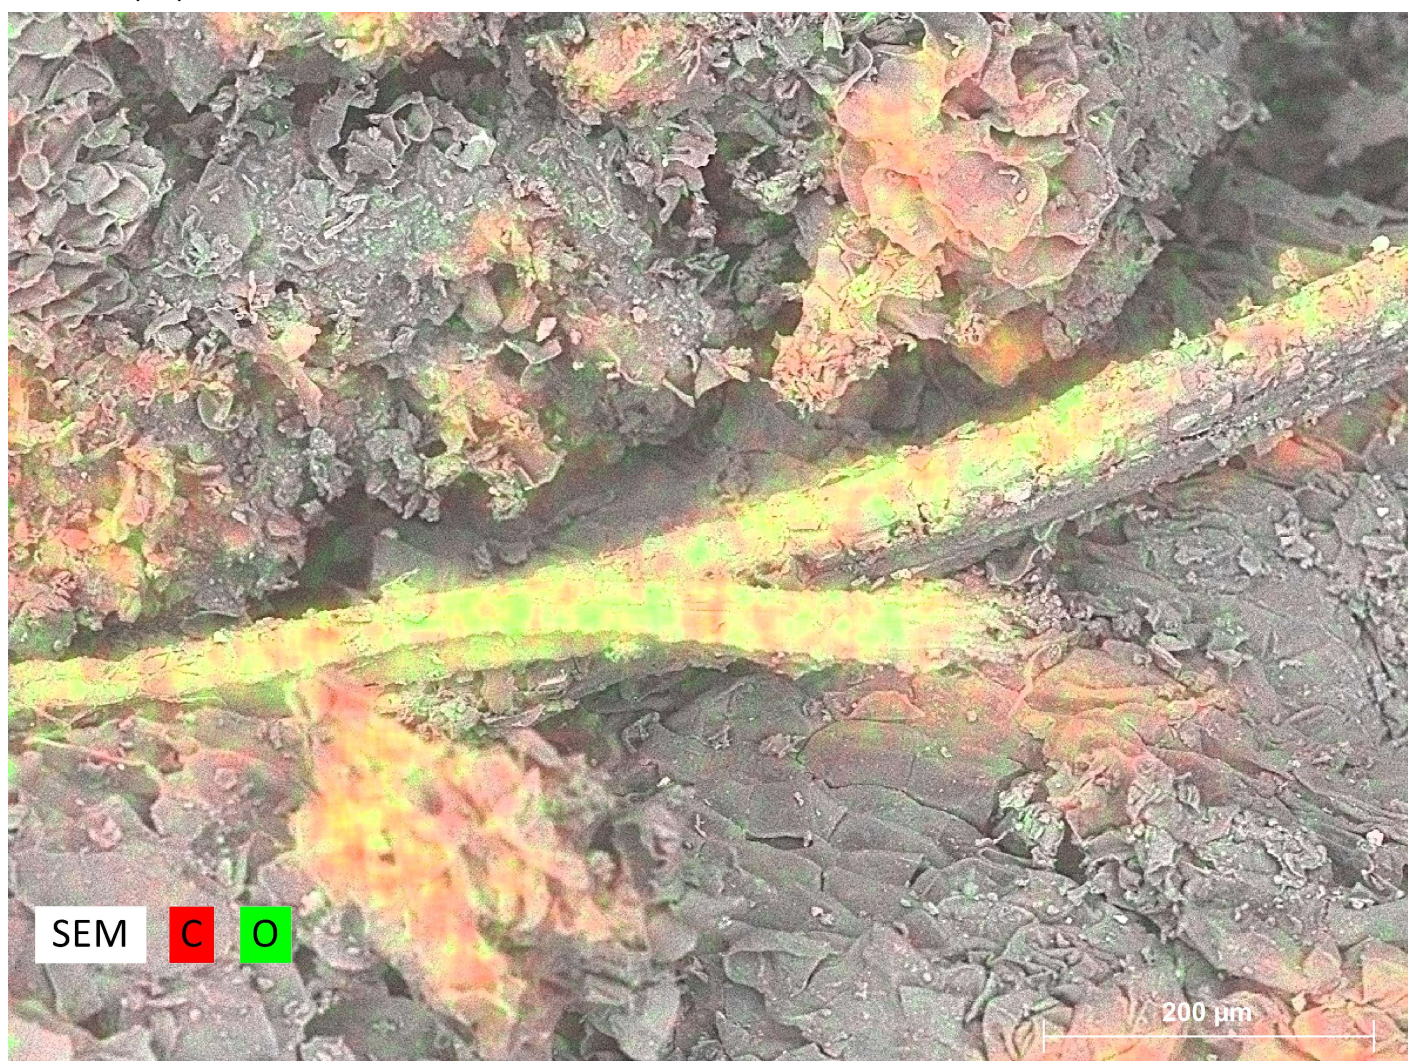

| Name | Date       | Time     | HV<br>[kV] | Mag  | WD<br>[mm] |
|------|------------|----------|------------|------|------------|
| 2306 | 27/07/2022 | 10:55:38 | 10.0 keV   | 180x | 9.9 mm     |



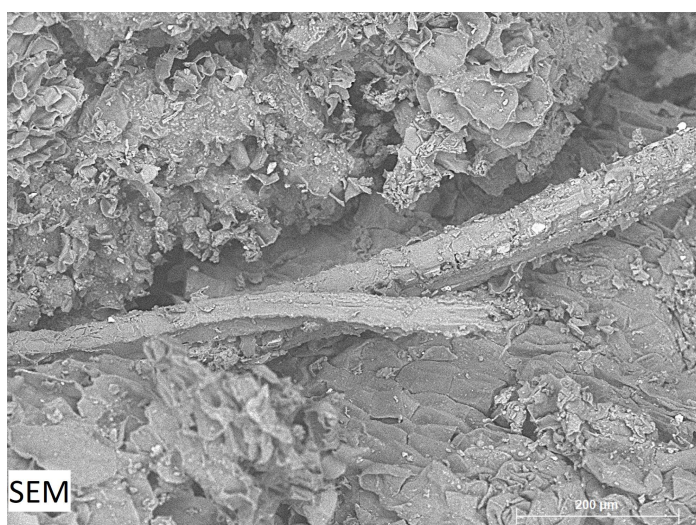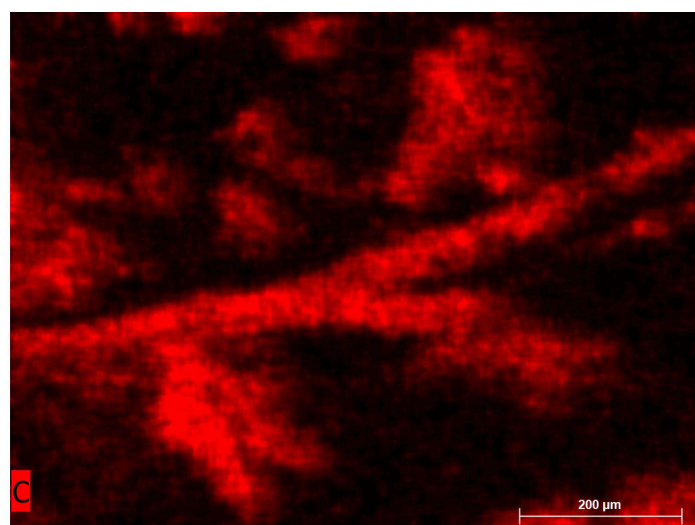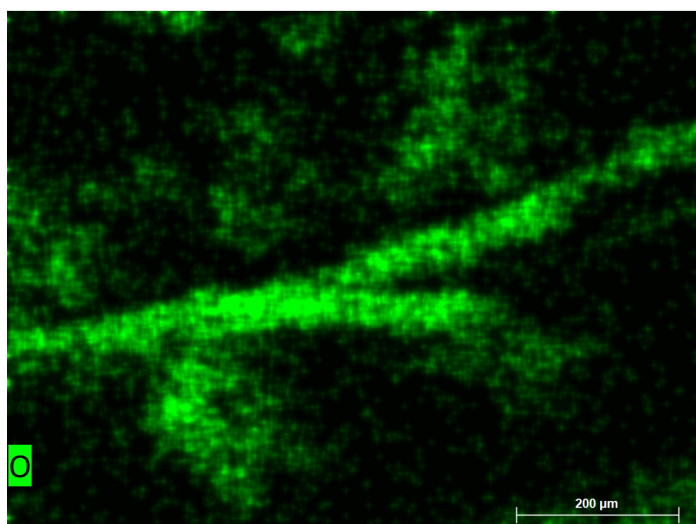

# Application Note

Company / Department

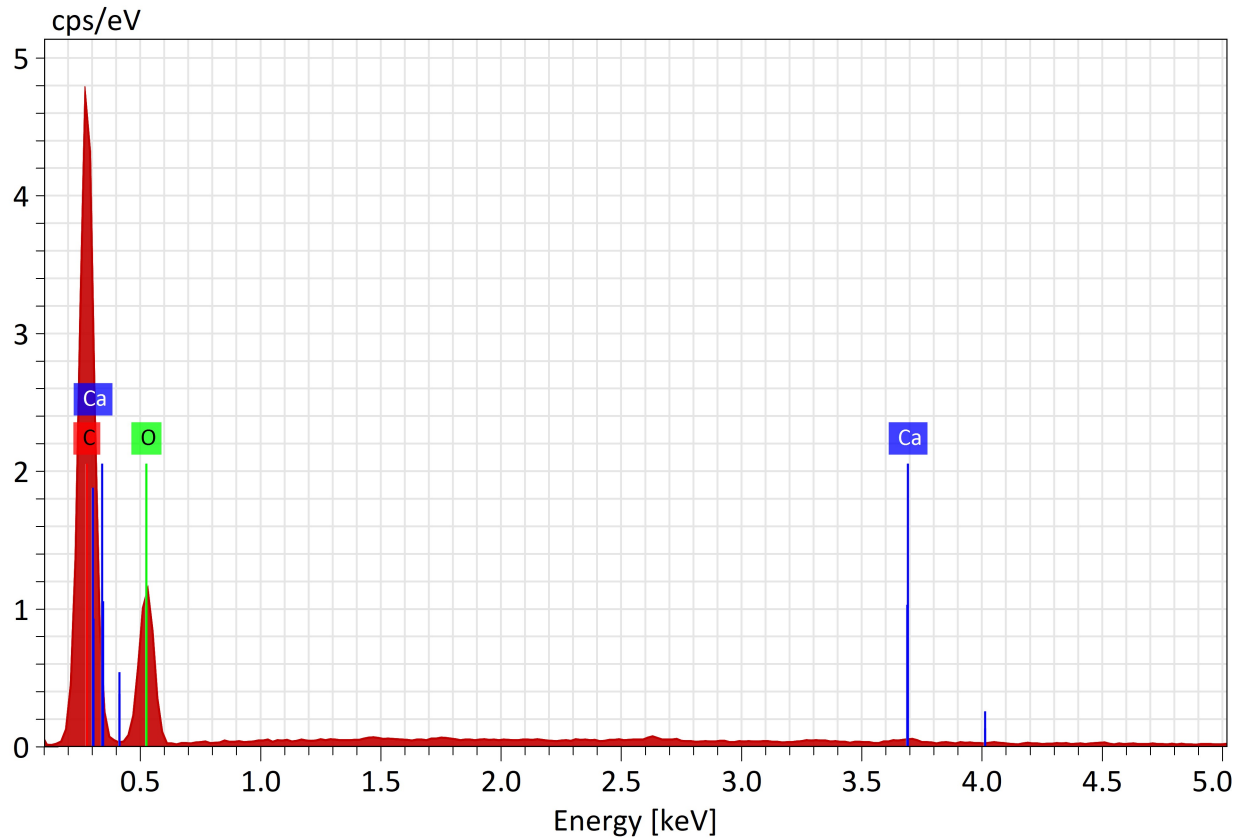

## Map

| Element | At. No. | Netto      | Mass [%]      | Mass Norm. [%] | Atom [%]      | abs. error [%]<br>(1 sigma) | rel. error [%]<br>(1 sigma) |
|---------|---------|------------|---------------|----------------|---------------|-----------------------------|-----------------------------|
| C       | 6       | 34634      | 72.66         | 72.66          | 77.98         | 2.78                        | 3.83                        |
| O       | 8       | 8435       | 27.34         | 27.34          | 22.02         | 1.31                        | 4.79                        |
|         |         | <b>Sum</b> | <b>100.00</b> | <b>100.00</b>  | <b>100.00</b> |                             |                             |



# Application Note

Company / Department

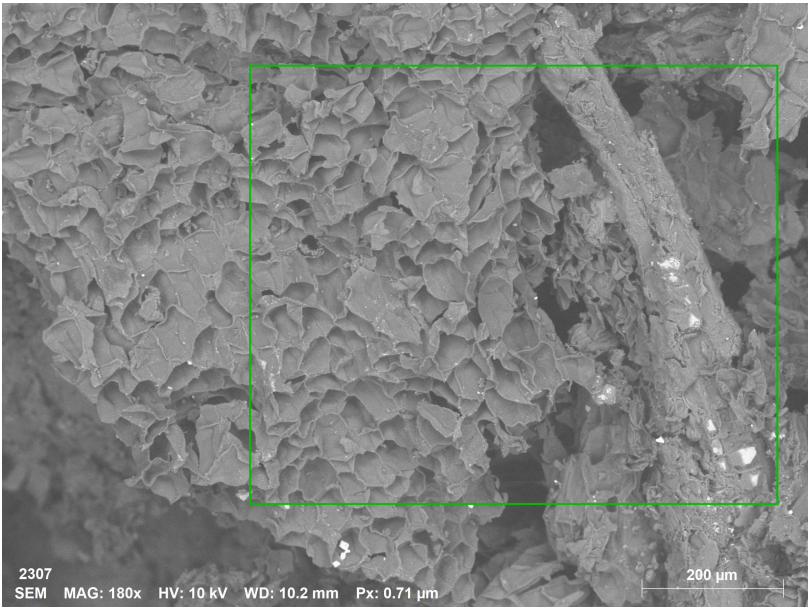

| Name | Date       | Time     | HV<br>[kV] | Mag  | WD<br>[mm] |
|------|------------|----------|------------|------|------------|
| 2307 | 27/07/2022 | 11:03:40 | 10.0 keV   | 180x | 10.2 mm    |

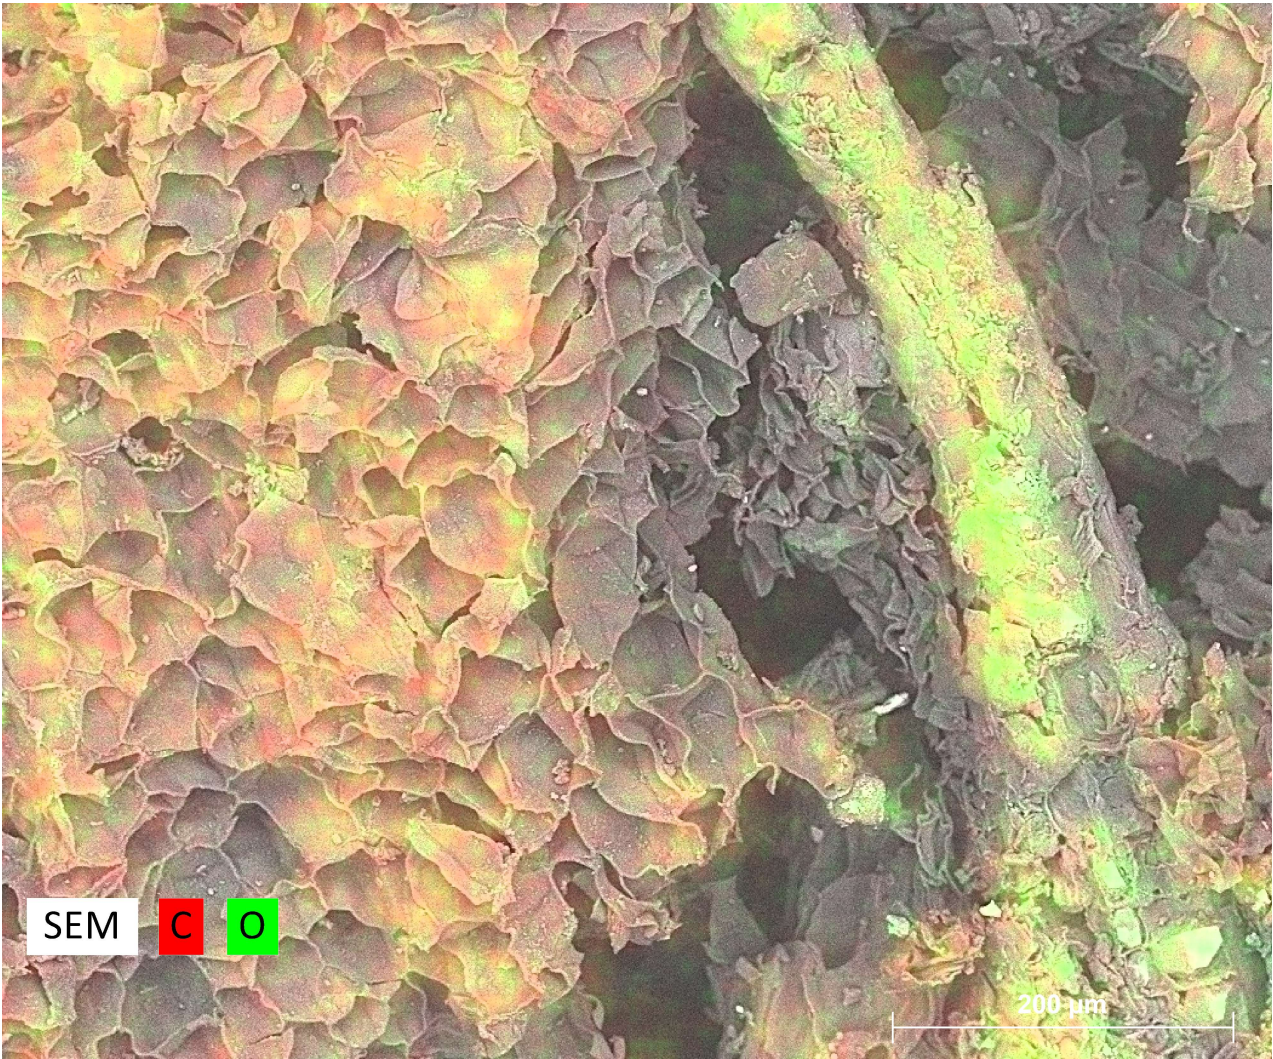

| Name | Date       | Time     | HV<br>[kV] | Mag  | WD<br>[mm] |
|------|------------|----------|------------|------|------------|
| 2306 | 27/07/2022 | 11:04:31 | 10.0 keV   | 180x | 10.2 mm    |

27/07/2022



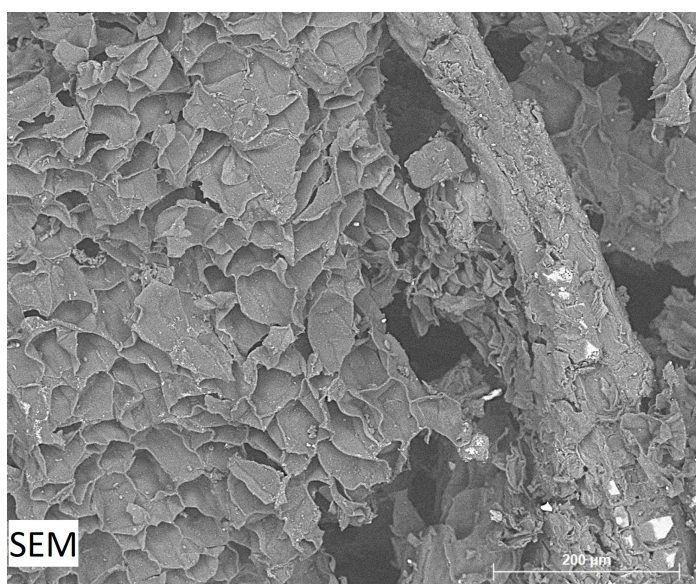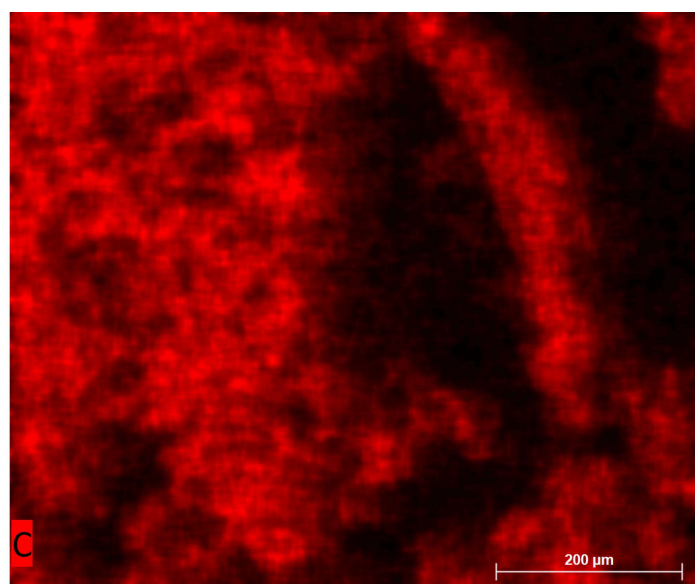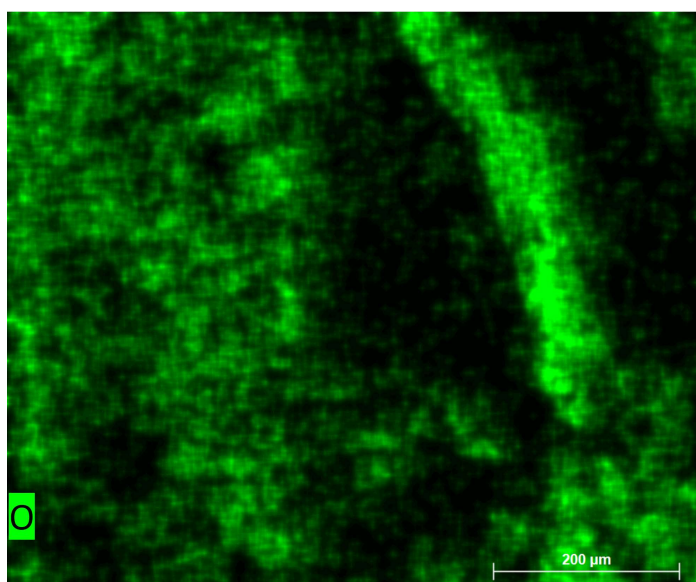



# Application Note

Company / Department

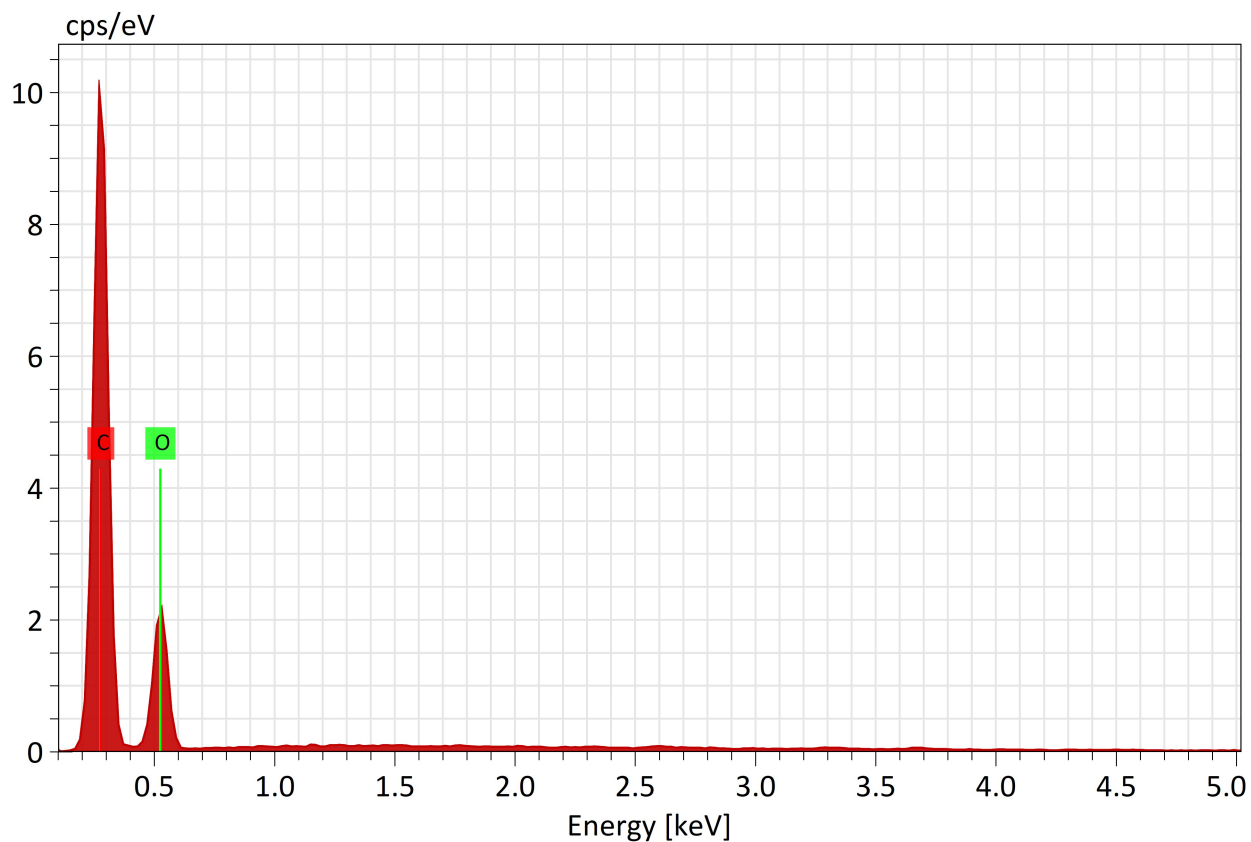

Map

| Element | At. No. | Netto      | Mass [%]      | Mass Norm. [%] | Atom [%]      | abs. error [%]<br>(1 sigma) | rel. error [%]<br>(1 sigma) |
|---------|---------|------------|---------------|----------------|---------------|-----------------------------|-----------------------------|
| C       | 6       | 70547      | 74.08         | 74.08          | 79.19         | 2.81                        | 3.79                        |
| O       | 8       | 15566      | 25.92         | 25.92          | 20.81         | 1.23                        | 4.74                        |
|         |         | <b>Sum</b> | <b>100.00</b> | <b>100.00</b>  | <b>100.00</b> |                             |                             |
