# Supplementary material for: Shear Thickening Fluids in Cork Agglomerates: An Exploration of Advantages and Drawbacks
Source: Preprints.org preprint supplement (doi:10.20944/preprints202304.0004.v1), 2023-04-03
Supplement: Supplementary file 4 [file EN_y_0.xlsx]

## Sheet: data
Time - Voltage - Voltage	Amplitude - Voltage - Voltage
0	560.5
4e-05	560.7
8e-05	561.4
0.00012	559.6
0.00016	562.5
0.0002	558
0.00024	563.6
0.00028	556.6
0.00032	563.4
0.00036	555.3
0.0004	563.6
0.00044	554.5
0.00048	562.4
0.00052	555
0.00056	561.7
0.0006	555.7
0.00064	561.2
0.00068	556.2
0.00072	561.4
0.00076	557.2
0.0008	561.2
0.00084	558
0.00088	561.5
0.00092	558.5
0.00096	561.8
0.001	559.1
0.00104	561.6
0.00108	559.5
0.00112	561.4
0.00116	560.4
0.0012	560.7
0.00124	561.5
0.00128	558.9
0.00132	562.9
0.00136	557.9
0.0014	563.3
0.00144	556.2
0.00148	563.5
0.00152	555.2
0.00156	563.2
0.0016	554.7
0.00164	562.8
0.00168	554.9
0.00172	561.6
0.00176	555.8
0.0018	561.2
0.00184	556.6
0.00188	561.1
0.00192	557.5
0.00196	561.3
0.002	558
0.00204	561.4
0.00208	558.2
0.00212	562.2
0.00216	559.1
0.0022	562.3
0.00224	559.8
0.00228	561.4
0.00232	560.9
0.00236	560.2
0.0024	561.8
0.00244	559.1
0.00248	563
0.00252	557.4
0.00256	563.3
0.0026	556.1
0.00264	563.3
0.00268	555.4
0.00272	563.1
0.00276	554.9
0.0028	562.3
0.00284	555.1
0.00288	561.8
0.00292	555.8
0.00296	561.3
0.003	556.9
0.00304	561
0.00308	557.1
0.00312	561.4
0.00316	558.2
0.0032	561.4
0.00324	558.8
0.00328	562.2
0.00332	559.2
0.00336	561.9
0.0034	559.8
0.00344	561.5
0.00348	561.1
0.00352	560.2
0.00356	561.9
0.0036	558.6
0.00364	563.1
0.00368	556.7
0.00372	563.7
0.00376	556.2
0.0038	563.6
0.00384	555.1
0.00388	562.9
0.00392	555.2
0.00396	562.4
0.004	555.5
0.00404	561.7
0.00408	556
0.00412	561.3
0.00416	556.7
0.0042	561.1
0.00424	557.8
0.00428	561.3
0.00432	558.3
0.00436	562
0.0044	559.1
0.00444	562.1
0.00448	559.5
0.00452	561.7
0.00456	560.3
0.0046	561.1
0.00464	561.2
0.00468	559.8
0.00472	562.4
0.00476	558.1
0.0048	563.1
0.00484	556.9
0.00488	563.8
0.00492	555.5
0.00496	563.7
0.005	555
0.00504	563.1
0.00508	554.8
0.00512	561.9
0.00516	555.5
0.0052	561.3
0.00524	556.5
0.00528	561.1
0.00532	556.9
0.00536	561.3
0.0054	557.7
0.00544	561.6
0.00548	558.3
0.00552	561.9
0.00556	558.8
0.0056	562.2
0.00564	559.7
0.00568	561.5
0.00572	560.8
0.00576	560.7
0.0058	561.7
0.00584	559.4
0.00588	562.6
0.00592	557.9
0.00596	563.3
0.006	556.4
0.00604	563.6
0.00608	555.5
0.00612	563.2
0.00616	554.8
0.0062	562.8
0.00624	554.9
0.00628	562
0.00632	555.6
0.00636	561.5
0.0064	556.6
0.00644	561.1
0.00648	557.4
0.00652	561.5
0.00656	557.9
0.0066	561.3
0.00664	558.5
0.00668	562
0.00672	558.8
0.00676	562
0.0068	559.9
0.00684	561.5
0.00688	560.9
0.00692	560.4
0.00696	561.9
0.007	559.2
0.00704	562.8
0.00708	558
0.00712	563.6
0.00716	556.4
0.0072	563.3
0.00724	555.2
0.00728	563
0.00732	554.8
0.00736	562.6
0.0074	555.3
0.00744	561.8
0.00748	555.3
0.00752	561.5
0.00756	556.5
0.0076	561.1
0.00764	557.6
0.00768	561.2
0.00772	558.2
0.00776	561.5
0.0078	558.4
0.00784	562
0.00788	559.2
0.00792	561.7
0.00796	559.8
0.008	561.5
0.00804	560.7
0.00808	560.5
0.00812	561.9
0.00816	558.9
0.0082	563.2
0.00824	557.3
0.00828	564
0.00832	556.2
0.00836	563.3
0.0084	555
0.00844	563.2
0.00848	554.8
0.00852	562.4
0.00856	555
0.0086	561.5
0.00864	555.7
0.00868	561.5
0.00872	556.7
0.00876	561.3
0.0088	557.3
0.00884	561
0.00888	558.1
0.00892	561.4
0.00896	558.4
0.009	561.6
0.00904	559.1
0.00908	562.1
0.00912	559.7
0.00916	561.4
0.0092	560.8
0.00924	560.4
0.00928	562
0.00932	558.9
0.00936	562.8
0.0094	557
0.00944	563.6
0.00948	555.7
0.00952	563.2
0.00956	555.3
0.0096	563.2
0.00964	554.5
0.00968	562.6
0.00972	555.1
0.00976	561.5
0.0098	555.6
0.00984	561.2
0.00988	556.8
0.00992	561.1
0.00996	556.7
0.01	560.3
0.01004	558.3
0.01008	561.5
0.01012	558.3
0.01016	562.1
0.0102	559
0.01024	561.9
0.01028	559.8
0.01032	561.4
0.01036	561.1
0.0104	560.2
0.01044	562
0.01048	558.9
0.01052	562.8
0.01056	556.9
0.0106	563.3
0.01064	555.9
0.01068	563.3
0.01072	554.9
0.01076	563
0.0108	554.8
0.01084	562.5
0.01088	554.9
0.01092	561.6
0.01096	555.6
0.011	561.2
0.01104	556.4
0.01108	561.1
0.01112	557.4
0.01116	561.2
0.0112	558.1
0.01124	561.9
0.01128	558.5
0.01132	562.1
0.01136	559.4
0.0114	561.7
0.01144	559.9
0.01148	561
0.01152	561
0.01156	559.8
0.0116	561.9
0.01164	558.1
0.01168	563.1
0.01172	556.9
0.01176	563.3
0.0118	555.7
0.01184	563
0.01188	555
0.01192	562.8
0.01196	554.5
0.012	562.1
0.01204	555.3
0.01208	561.6
0.01212	556
0.01216	561.2
0.0122	556.5
0.01224	561.1
0.01228	557.6
0.01232	561.2
0.01236	558.2
0.0124	561.5
0.01244	558.6
0.01248	561.8
0.01252	559.4
0.01256	561.5
0.0126	560
0.01264	561.1
0.01268	561
0.01272	559.4
0.01276	562.6
0.0128	557.8
0.01284	563.1
0.01288	556.7
0.01292	563.8
0.01296	555.2
0.013	563.1
0.01304	554.8
0.01308	562.3
0.01312	554.5
0.01316	561.7
0.0132	555.3
0.01324	561.4
0.01328	556
0.01332	561.1
0.01336	557
0.0134	561.4
0.01344	557.5
0.01348	561.4
0.01352	558.2
0.01356	561.5
0.0136	558.5
0.01364	561.7
0.01368	559.5
0.01372	561.4
0.01376	560.3
0.0138	560.3
0.01384	561.5
0.01388	559.2
0.01392	562.4
0.01396	557.8
0.014	563.2
0.01404	556
0.01408	563.2
0.01412	555.1
0.01416	563
0.0142	554.7
0.01424	562.3
0.01428	554.7
0.01432	561.7
0.01436	555.4
0.0144	561.2
0.01444	556
0.01448	561
0.01452	557.2
0.01456	561.1
0.0146	557.9
0.01464	561.4
0.01468	558.4
0.01472	561.8
0.01476	559
0.0148	561.9
0.01484	559.4
0.01488	561.4
0.01492	560.5
0.01496	560.4
0.015	561.6
0.01504	558.7
0.01508	562.7
0.01512	557.2
0.01516	563.4
0.0152	556
0.01524	563.1
0.01528	554.9
0.01532	562.7
0.01536	554.7
0.0154	562.4
0.01544	555
0.01548	561.5
0.01552	555.8
0.01556	561
0.0156	556.6
0.01564	561
0.01568	557.2
0.01572	561
0.01576	558
0.0158	561.4
0.01584	558.7
0.01588	561.6
0.01592	559.1
0.01596	561.6
0.016	559.9
0.01604	561
0.01608	560.7
0.01612	559.9
0.01616	562.1
0.0162	558.3
0.01624	562.9
0.01628	556.9
0.01632	563.3
0.01636	555.2
0.0164	563.3
0.01644	554.8
0.01648	562.5
0.01652	554.6
0.01656	562.1
0.0166	555
0.01664	561.5
0.01668	555.9
0.01672	561.1
0.01676	556.7
0.0168	561.2
0.01684	557.1
0.01688	561.2
0.01692	558
0.01696	561.4
0.017	558.8
0.01704	561.9
0.01708	559.1
0.01712	561.5
0.01716	560
0.0172	561
0.01724	561.2
0.01728	559.6
0.01732	562.3
0.01736	558
0.0174	563
0.01744	556.4
0.01748	563.3
0.01752	555.3
0.01756	563.3
0.0176	554.7
0.01764	562.6
0.01768	554.8
0.01772	561.8
0.01776	555.2
0.0178	561.3
0.01784	556.2
0.01788	561.1
0.01792	557.1
0.01796	561
0.018	557.7
0.01804	561.6
0.01808	558
0.01812	561.6
0.01816	558.6
0.0182	561.9
0.01824	559.4
0.01828	561.5
0.01832	560.2
0.01836	560.8
0.0184	561.4
0.01844	559.3
0.01848	562.6
0.01852	557.8
0.01856	563
0.0186	556.6
0.01864	563.5
0.01868	555.3
0.01872	563.1
0.01876	554.7
0.0188	562.6
0.01884	554.4
0.01888	562.1
0.01892	555.6
0.01896	561.1
0.019	556.3
0.01904	561
0.01908	557.1
0.01912	560.9
0.01916	558
0.0192	561.4
0.01924	558.2
0.01928	561.8
0.01932	558.8
0.01936	562.2
0.0194	559.6
0.01944	561.6
0.01948	560.8
0.01952	560.3
0.01956	561.7
0.0196	558.7
0.01964	562.8
0.01968	557.4
0.01972	563.5
0.01976	556.2
0.0198	563.6
0.01984	555.2
0.01988	563
0.01992	554.7
0.01996	562.5
0.02	557.8
0.02004	561.6
0.02008	555.7
0.02012	561.4
0.02016	556.7
0.0202	560.7
0.02024	557.3
0.02028	561.9
0.02032	558
0.02036	561.5
0.0204	558.8
0.02044	561.8
0.02048	559.1
0.02052	561.8
0.02056	560
0.0206	561.3
0.02064	561
0.02068	560.1
0.02072	562
0.02076	558.7
0.0208	563
0.02084	556.9
0.02088	563.5
0.02092	555.4
0.02096	563.6
0.021	554.9
0.02104	562.9
0.02108	555
0.02112	561.9
0.02116	555.4
0.0212	561.6
0.02124	555.9
0.02128	561.1
0.02132	557.1
0.02136	561
0.0214	557.8
0.02144	561.5
0.02148	558
0.02152	561.6
0.02156	558.8
0.0216	561.8
0.02164	559.6
0.02168	561.7
0.02172	560.3
0.02176	560.8
0.0218	561.2
0.02184	559.7
0.02188	562.6
0.02192	558
0.02196	563.3
0.022	556.9
0.02204	563.5
0.02208	555.5
0.02212	563.2
0.02216	554.8
0.0222	563
0.02224	554.7
0.02228	562.1
0.02232	555.6
0.02236	561.6
0.0224	556
0.02244	560.9
0.02248	557.4
0.02252	560.8
0.02256	557.7
0.0226	561.5
0.02264	558.1
0.02268	561.9
0.02272	558.9
0.02276	561.9
0.0228	559.4
0.02284	561.7
0.02288	560.4
0.02292	560.7
0.02296	561.6
0.023	559.3
0.02304	563.1
0.02308	558
0.02312	563
0.02316	556.4
0.0232	563.4
0.02324	555.2
0.02328	563.2
0.02332	554.7
0.02336	562.5
0.0234	555
0.02344	562
0.02348	555.5
0.02352	561.2
0.02356	556.2
0.0236	561.2
0.02364	557.4
0.02368	561.1
0.02372	557.8
0.02376	561.6
0.0238	558.9
0.02384	562
0.02388	558.9
0.02392	562.3
0.02396	559.8
0.024	561.8
0.02404	560.6
0.02408	560.6
0.02412	561.9
0.02416	559.3
0.0242	563
0.02424	557.4
0.02428	563.5
0.02432	556.2
0.02436	563.6
0.0244	555.3
0.02444	563.3
0.02448	554.9
0.02452	562.6
0.02456	555.2
0.0246	561.9
0.02464	555.9
0.02468	561.3
0.02472	556.8
0.02476	561.1
0.0248	557.4
0.02484	561.4
0.02488	558.1
0.02492	561.7
0.02496	558.7
0.025	562
0.02504	559.4
0.02508	562
0.02512	560.1
0.02516	561.1
0.0252	560.9
0.02524	560.5
0.02528	562.2
0.02532	558.7
0.02536	563.1
0.0254	557.1
0.02544	563.5
0.02548	555.9
0.02552	563.3
0.02556	555
0.0256	562.8
0.02564	554.9
0.02568	562.3
0.02572	555.1
0.02576	562
0.0258	556.2
0.02584	561.2
0.02588	557
0.02592	561.1
0.02596	557.7
0.026	561.2
0.02604	558.3
0.02608	562
0.02612	558.7
0.02616	562
0.0262	559.5
0.02624	561.7
0.02628	560.5
0.02632	561.2
0.02636	561.5
0.0264	559.8
0.02644	562.4
0.02648	558.3
0.02652	563.2
0.02656	557.1
0.0266	563.5
0.02664	555.8
0.02668	563.4
0.02672	555
0.02676	562.9
0.0268	554.9
0.02684	562.4
0.02688	555.2
0.02692	561.5
0.02696	555.7
0.027	561.4
0.02704	556.8
0.02708	560.8
0.02712	558
0.02716	561.6
0.0272	558.4
0.02724	561.7
0.02728	558.9
0.02732	562.1
0.02736	559.4
0.0274	561.9
0.02744	560
0.02748	561.1
0.02752	561.4
0.02756	559.6
0.0276	562.3
0.02764	558.2
0.02768	563.3
0.02772	556.8
0.02776	563.4
0.0278	555.6
0.02784	563.3
0.02788	554.9
0.02792	562.7
0.02796	555.1
0.028	562
0.02804	555.2
0.02808	561.7
0.02812	556.1
0.02816	561.5
0.0282	556.9
0.02824	561.3
0.02828	557.9
0.02832	561
0.02836	558.4
0.0284	561.7
0.02844	558.8
0.02848	562
0.02852	559.4
0.02856	561.8
0.0286	560.5
0.02864	561.1
0.02868	561.2
0.02872	559.8
0.02876	562.2
0.0288	558
0.02884	563.3
0.02888	556.5
0.02892	563.8
0.02896	555.6
0.029	563.2
0.02904	555.2
0.02908	562.5
0.02912	554.6
0.02916	561.8
0.0292	555.4
0.02924	561.5
0.02928	556.2
0.02932	561
0.02936	557
0.0294	561.3
0.02944	557.5
0.02948	561.6
0.02952	557.8
0.02956	562.2
0.0296	558.6
0.02964	562
0.02968	559.5
0.02972	561.3
0.02976	560.6
0.0298	560.8
0.02984	561.3
0.02988	559.3
0.02992	562.7
0.02996	557.9
0.03	563.1
0.03004	556.2
0.03008	563.2
0.03012	555.1
0.03016	563.1
0.0302	555.1
0.03024	562.7
0.03028	554.9
0.03032	562.2
0.03036	555
0.0304	561.3
0.03044	556.1
0.03048	561
0.03052	557.2
0.03056	561.1
0.0306	557.4
0.03064	561.3
0.03068	558.5
0.03072	561.8
0.03076	558.8
0.0308	562
0.03084	559.7
0.03088	561.5
0.03092	560.4
0.03096	560.3
0.031	561.9
0.03104	558.9
0.03108	562.8
0.03112	557.6
0.03116	563.3
0.0312	556.2
0.03124	563.3
0.03128	555.3
0.03132	562.8
0.03136	554.7
0.0314	562.6
0.03144	554.6
0.03148	561.7
0.03152	555.6
0.03156	561.2
0.0316	556.6
0.03164	560.9
0.03168	557.1
0.03172	561
0.03176	558
0.0318	561.5
0.03184	558.5
0.03188	561.7
0.03192	558.9
0.03196	561.8
0.032	559.5
0.03204	561.6
0.03208	560.4
0.03212	560.2
0.03216	561.9
0.0322	558.7
0.03224	562.9
0.03228	557.2
0.03232	563.4
0.03236	555.5
0.0324	563.4
0.03244	554.8
0.03248	563
0.03252	554.9
0.03256	562
0.0326	554.9
0.03264	561.5
0.03268	556
0.03272	561.1
0.03276	556.4
0.0328	561.1
0.03284	557.1
0.03288	561.3
0.03292	558
0.03296	561.8
0.033	558.6
0.03304	561.8
0.03308	559.3
0.03312	561.5
0.03316	560
0.0332	561.1
0.03324	560.8
0.03328	559.8
0.03332	562.2
0.03336	558
0.0334	562.8
0.03344	556.9
0.03348	563.4
0.03352	555.6
0.03356	563.5
0.0336	554.7
0.03364	562.6
0.03368	554.6
0.03372	561.9
0.03376	555.1
0.0338	561.3
0.03384	555.7
0.03388	561.1
0.03392	556.7
0.03396	560.7
0.034	557.3
0.03404	561.3
0.03408	558.2
0.03412	561.5
0.03416	558.6
0.0342	561.9
0.03424	559.3
0.03428	561.4
0.03432	560.3
0.03436	560.6
0.0344	561.5
0.03444	559.4
0.03448	562.2
0.03452	557.8
0.03456	563.3
0.0346	556.3
0.03464	563.2
0.03468	555
0.03472	563
0.03476	554.5
0.0348	562.6
0.03484	554.6
0.03488	561.8
0.03492	555.3
0.03496	561.2
0.035	556.2
0.03504	560.8
0.03508	557.1
0.03512	560.8
0.03516	557.8
0.0352	561.3
0.03524	558
0.03528	561.7
0.03532	558.6
0.03536	561.8
0.0354	559.5
0.03544	561.4
0.03548	560.4
0.03552	560.4
0.03556	561.6
0.0356	559
0.03564	562.5
0.03568	557.4
0.03572	563.3
0.03576	555.8
0.0358	563.2
0.03584	555.2
0.03588	562.9
0.03592	554.8
0.03596	562.3
0.036	554.9
0.03604	561.5
0.03608	555.3
0.03612	561.1
0.03616	556.1
0.0362	561.3
0.03624	557
0.03628	561.1
0.03632	557.9
0.03636	561.1
0.0364	558.3
0.03644	561.5
0.03648	559.1
0.03652	561.6
0.03656	559.7
0.0366	561.3
0.03664	560.4
0.03668	560.1
0.03672	561.7
0.03676	558.7
0.0368	562.8
0.03684	556.9
0.03688	563.4
0.03692	555.4
0.03696	563.2
0.037	554.4
0.03704	562.9
0.03708	554.9
0.03712	562.2
0.03716	555.4
0.0372	561.5
0.03724	556.1
0.03728	561
0.03732	556.9
0.03736	561.1
0.0374	557.4
0.03744	561.3
0.03748	557.7
0.03752	561.7
0.03756	558.8
0.0376	561.7
0.03764	559.2
0.03768	561.8
0.03772	560.1
0.03776	561
0.0378	561.4
0.03784	559.3
0.03788	562.2
0.03792	558
0.03796	563
0.038	556.5
0.03804	563.4
0.03808	555.3
0.03812	563.2
0.03816	554.8
0.0382	562.4
0.03824	554.7
0.03828	561.9
0.03832	555.2
0.03836	561.6
0.0384	556.2
0.03844	561.1
0.03848	557.4
0.03852	560.8
0.03856	557.9
0.0386	561.4
0.03864	558.3
0.03868	561.8
0.03872	558.6
0.03876	562.2
0.0388	559.6
0.03884	561.5
0.03888	560.6
0.03892	560.6
0.03896	561.8
0.039	559.1
0.03904	562.9
0.03908	557.4
0.03912	563.3
0.03916	556.6
0.0392	563.4
0.03924	555.2
0.03928	563.2
0.03932	554.6
0.03936	562.6
0.0394	555
0.03944	561.7
0.03948	555.5
0.03952	561.5
0.03956	556.4
0.0396	561
0.03964	557
0.03968	561.2
0.03972	558
0.03976	561.4
0.0398	558.4
0.03984	562.1
0.03988	559
0.03992	561.8
0.03996	559.6
0.04	561.5
0.04004	560.3
0.04008	560.2
0.04012	561.6
0.04016	558.9
0.0402	562.9
0.04024	557
0.04028	563.7
0.04032	556.1
0.04036	563.5
0.0404	555.1
0.04044	563
0.04048	554.9
0.04052	562.2
0.04056	555.2
0.0406	561.5
0.04064	555.8
0.04068	561.2
0.04072	556.4
0.04076	561.2
0.0408	557.4
0.04084	561.2
0.04088	558
0.04092	561.8
0.04096	558.4
0.041	561.8
0.04104	559.2
0.04108	561.8
0.04112	560.1
0.04116	561.4
0.0412	561
0.04124	559.8
0.04128	562.1
0.04132	558.4
0.04136	562.6
0.0414	557.2
0.04144	563.7
0.04148	555.8
0.04152	563.6
0.04156	554.9
0.0416	562.9
0.04164	555
0.04168	562.1
0.04172	555.1
0.04176	561.5
0.0418	556
0.04184	561.2
0.04188	556.7
0.04192	560.9
0.04196	557.5
0.042	561.2
0.04204	558.1
0.04208	562.1
0.04212	558.3
0.04216	562
0.0422	559.2
0.04224	561.7
0.04228	560.2
0.04232	560.8
0.04236	561.4
0.0424	559.8
0.04244	562.6
0.04248	558.3
0.04252	563.1
0.04256	557
0.0426	563.4
0.04264	555.5
0.04268	563.1
0.04272	554.9
0.04276	563
0.0428	554.9
0.04284	562
0.04288	555.3
0.04292	561.7
0.04296	556.2
0.043	561
0.04304	557.2
0.04308	561.4
0.04312	557.8
0.04316	561.5
0.0432	558.5
0.04324	561.8
0.04328	558.3
0.04332	562
0.04336	559.7
0.0434	561.5
0.04344	560.5
0.04348	560.9
0.04352	561.5
0.04356	559.7
0.0436	562.6
0.04364	557.6
0.04368	563.6
0.04372	556.6
0.04376	563.8
0.0438	555.4
0.04384	563.2
0.04388	554.7
0.04392	562.6
0.04396	555.2
0.044	561.9
0.04404	556
0.04408	561.4
0.04412	556.4
0.04416	561.3
0.0442	557.1
0.04424	561.1
0.04428	558
0.04432	561.6
0.04436	558.5
0.0444	561.8
0.04444	558.9
0.04448	562.2
0.04452	559.8
0.04456	561.7
0.0446	560.8
0.04464	560.7
0.04468	561.8
0.04472	558.9
0.04476	563
0.0448	557.8
0.04484	563.5
0.04488	556
0.04492	563.6
0.04496	555.2
0.045	563.3
0.04504	555.1
0.04508	562.6
0.04512	555.2
0.04516	561.8
0.0452	556.2
0.04524	561.2
0.04528	556.8
0.04532	561.1
0.04536	557.5
0.0454	561.3
0.04544	557.9
0.04548	561.8
0.04552	558.6
0.04556	562.1
0.0456	559.1
0.04564	561.8
0.04568	560
0.04572	561.5
0.04576	561.3
0.0458	560.2
0.04584	562.1
0.04588	558.8
0.04592	563
0.04596	557.5
0.046	563.8
0.04604	555.9
0.04608	563.5
0.04612	555.3
0.04616	563
0.0462	554.6
0.04624	562.6
0.04628	555.1
0.04632	561.6
0.04636	556.1
0.0464	561.2
0.04644	557
0.04648	561
0.04652	557.5
0.04656	561.4
0.0466	558
0.04664	561.5
0.04668	558.7
0.04672	562.4
0.04676	559.4
0.0468	561.9
0.04684	560
0.04688	561.2
0.04692	561.4
0.04696	560.2
0.047	562.4
0.04704	558.5
0.04708	563
0.04712	556.8
0.04716	563.6
0.0472	556
0.04724	563.5
0.04728	555.1
0.04732	563.2
0.04736	554.7
0.0474	562
0.04744	555.6
0.04748	561.6
0.04752	556
0.04756	561
0.0476	556.7
0.04764	561.2
0.04768	557.7
0.04772	561.2
0.04776	558.4
0.0478	561.5
0.04784	558.8
0.04788	562.3
0.04792	559.3
0.04796	561.9
0.048	560
0.04804	561.2
0.04808	561.2
0.04812	559.7
0.04816	562.3
0.0482	558.2
0.04824	563.3
0.04828	556.8
0.04832	563.9
0.04836	555.6
0.0484	563.2
0.04844	555
0.04848	562.8
0.04852	555.1
0.04856	562.1
0.0486	555.5
0.04864	561.3
0.04868	556.1
0.04872	561.2
0.04876	557.1
0.0488	561.4
0.04884	557.4
0.04888	561.2
0.04892	558.3
0.04896	561.6
0.049	558.6
0.04904	562
0.04908	559.4
0.04912	561.7
0.04916	560.3
0.0492	560.5
0.04924	561.6
0.04928	559.1
0.04932	562.4
0.04936	557.9
0.0494	563.2
0.04944	556.1
0.04948	563.8
0.04952	555.3
0.04956	562.8
0.0496	555
0.04964	562.3
0.04968	554.7
0.04972	562
0.04976	555.4
0.0498	561.1
0.04984	556.7
0.04988	560.8
0.04992	557.4
0.04996	561.2
0.05	557.8
0.05004	561.5
0.05008	558.5
0.05012	561.7
0.05016	558.6
0.0502	561.8
0.05024	559.7
0.05028	561.2
0.05032	560.9
0.05036	560.1
0.0504	561.7
0.05044	558.9
0.05048	562.8
0.05052	557.4
0.05056	563.5
0.0506	555.8
0.05064	563.2
0.05068	555.1
0.05072	562.9
0.05076	554.7
0.0508	562.4
0.05084	554.9
0.05088	561.6
0.05092	555.5
0.05096	561.3
0.051	556.5
0.05104	561.2
0.05108	557.1
0.05112	560.8
0.05116	558
0.0512	561.5
0.05124	558.3
0.05128	561.8
0.05132	558.9
0.05136	561.6
0.0514	559.9
0.05144	561.1
0.05148	561
0.05152	560.1
0.05156	561.8
0.0516	558.5
0.05164	563
0.05168	556.9
0.05172	563.3
0.05176	555.4
0.0518	563.2
0.05184	554.9
0.05188	562.5
0.05192	554.8
0.05196	562.3
0.052	554.9
0.05204	561.7
0.05208	555.8
0.05212	561.2
0.05216	556.4
0.0522	561.2
0.05224	557.4
0.05228	561.3
0.05232	558.2
0.05236	561.4
0.0524	558.5
0.05244	561.8
0.05248	559
0.05252	561.8
0.05256	559.9
0.0526	561
0.05264	560.8
0.05268	560.1
0.05272	562
0.05276	558.5
0.0528	563
0.05284	556.8
0.05288	563.4
0.05292	555.4
0.05296	563.4
0.053	554.8
0.05304	562.9
0.05308	554.8
0.05312	562
0.05316	555.2
0.0532	561.3
0.05324	556
0.05328	560.9
0.05332	556.9
0.05336	561
0.0534	557.3
0.05344	561.1
0.05348	558
0.05352	561.6
0.05356	558.5
0.0536	562.1
0.05364	559
0.05368	561.7
0.05372	560.1
0.05376	560.8
0.0538	560.9
0.05384	559.7
0.05388	562
0.05392	558.3
0.05396	562.9
0.054	556.4
0.05404	563.1
0.05408	555.7
0.05412	563.3
0.05416	554.9
0.0542	563
0.05424	554.5
0.05428	562
0.05432	554.9
0.05436	561.6
0.0544	556
0.05444	560.8
0.05448	556.6
0.05452	560.8
0.05456	557.5
0.0546	561.3
0.05464	558.2
0.05468	561.8
0.05472	558.5
0.05476	561.9
0.0548	559.3
0.05484	561.6
0.05488	560
0.05492	560.4
0.05496	561.2
0.055	559.3
0.05504	562.3
0.05508	558.3
0.05512	563
0.05516	556.7
0.0552	563.3
0.05524	555.5
0.05528	563.2
0.05532	554.7
0.05536	562.5
0.0554	554.7
0.05544	561.9
0.05548	555.1
0.05552	561.5
0.05556	556.1
0.0556	561
0.05564	556.9
0.05568	561
0.05572	557.7
0.05576	561.2
0.0558	558.5
0.05584	561.6
0.05588	558.7
0.05592	561.6
0.05596	559.3
0.056	561.5
0.05604	560.2
0.05608	560.8
0.05612	561.2
0.05616	559.5
0.0562	562.5
0.05624	558
0.05628	563.1
0.05632	556.2
0.05636	563.6
0.0564	555.2
0.05644	563
0.05648	554.7
0.05652	562.4
0.05656	554.5
0.0566	561.6
0.05664	555.3
0.05668	561.4
0.05672	555.9
0.05676	560.9
0.0568	556.9
0.05684	561.3
0.05688	557.7
0.05692	561.5
0.05696	558.3
0.057	561.4
0.05704	558.4
0.05708	561.6
0.05712	560.1
0.05716	561.2
0.0572	560.6
0.05724	560.7
0.05728	561.5
0.05732	559.1
0.05736	562.8
0.0574	557.4
0.05744	563.4
0.05748	555.9
0.05752	563.2
0.05756	555.1
0.0576	563.3
0.05764	554.3
0.05768	562.5
0.05772	555.1
0.05776	561.6
0.0578	555.7
0.05784	561.2
0.05788	556.3
0.05792	561.2
0.05796	557.3
0.058	561.1
0.05804	557.9
0.05808	561.2
0.05812	558.3
0.05816	561.9
0.0582	558.8
0.05824	561.7
0.05828	559.7
0.05832	561.3
0.05836	560.8
0.0584	560.2
0.05844	562.2
0.05848	558.5
0.05852	562.6
0.05856	557.2
0.0586	563.3
0.05864	555.9
0.05868	563.4
0.05872	554.9
0.05876	563.1
0.0588	554.5
0.05884	562.5
0.05888	555.2
0.05892	561.9
0.05896	555.7
0.059	561.4
0.05904	556.5
0.05908	560.9
0.05912	557.7
0.05916	561.1
0.0592	558.2
0.05924	561.5
0.05928	558.4
0.05932	562.1
0.05936	559
0.0594	561.7
0.05944	559.7
0.05948	561.1
0.05952	560.9
0.05956	560
0.0596	561.9
0.05964	558.7
0.05968	562.8
0.05972	557.1
0.05976	563.5
0.0598	555.5
0.05984	563.5
0.05988	555.3
0.05992	562.7
0.05996	554.8
0.06	562.2
0.06004	554.9
0.06008	561.6
0.06012	555.6
0.06016	561.3
0.0602	556.6
0.06024	561.1
0.06028	557.1
0.06032	561.3
0.06036	558
0.0604	561.5
0.06044	558.6
0.06048	562.2
0.06052	559.3
0.06056	561.8
0.0606	559.9
0.06064	561.1
0.06068	561
0.06072	560.2
0.06076	561.9
0.0608	558.8
0.06084	563.1
0.06088	557.3
0.06092	563.5
0.06096	555.8
0.061	563.5
0.06104	554.9
0.06108	563
0.06112	554.8
0.06116	562.3
0.0612	555.3
0.06124	561.7
0.06128	555.7
0.06132	561.3
0.06136	556.8
0.0614	561.2
0.06144	557.5
0.06148	561.3
0.06152	558.2
0.06156	561.9
0.0616	558.7
0.06164	562
0.06168	559.5
0.06172	561.6
0.06176	560.3
0.0618	561
0.06184	560.7
0.06188	560.3
0.06192	562.2
0.06196	558.4
0.062	563
0.06204	557.1
0.06208	563.3
0.06212	555.8
0.06216	563.5
0.0622	554.8
0.06224	563
0.06228	554.6
0.06232	561.9
0.06236	555.2
0.0624	561.6
0.06244	556
0.06248	561.1
0.06252	557.1
0.06256	561.1
0.0626	557.6
0.06264	561.5
0.06268	558.3
0.06272	562.1
0.06276	558.9
0.0628	561.9
0.06284	559
0.06288	561.9
0.06292	560.4
0.06296	561
0.063	561.4
0.06304	559.7
0.06308	562.4
0.06312	558.3
0.06316	563.3
0.0632	556.7
0.06324	563.7
0.06328	555.4
0.06332	563.1
0.06336	554.9
0.0634	562.7
0.06344	554.7
0.06348	562.3
0.06352	555.3
0.06356	561.6
0.0636	556.3
0.06364	561.1
0.06368	557.2
0.06372	561.5
0.06376	558
0.0638	561.4
0.06384	558.7
0.06388	561.9
0.06392	558.7
0.06396	562.2
0.064	559.9
0.06404	561.7
0.06408	560.6
0.06412	560.6
0.06416	561.9
0.0642	559.4
0.06424	562.9
0.06428	557.7
0.06432	563.5
0.06436	556.4
0.0644	563.7
0.06444	555.5
0.06448	563
0.06452	555
0.06456	562.6
0.0646	555.4
0.06464	562
0.06468	555.4
0.06472	561.4
0.06476	556.4
0.0648	561.4
0.06484	557.3
0.06488	561.3
0.06492	557.9
0.06496	561.5
0.065	558.6
0.06504	561.9
0.06508	558.9
0.06512	562
0.06516	559.7
0.0652	561.5
0.06524	560.6
0.06528	560.5
0.06532	562
0.06536	559.2
0.0654	562.8
0.06544	557.7
0.06548	563.5
0.06552	556.3
0.06556	563.7
0.0656	554.9
0.06564	563.2
0.06568	555.1
0.06572	562.6
0.06576	555.1
0.0658	562
0.06584	555.9
0.06588	561.3
0.06592	556.7
0.06596	561.3
0.066	557.5
0.06604	561.5
0.06608	557.9
0.06612	561.7
0.06616	558.6
0.0662	561.9
0.06624	559.2
0.06628	562.1
0.06632	559.9
0.06636	561.5
0.0664	561.1
0.06644	560.2
0.06648	562.1
0.06652	558.7
0.06656	563.3
0.0666	557.4
0.06664	563.6
0.06668	555.7
0.06672	563.6
0.06676	555.1
0.0668	563.2
0.06684	554.7
0.06688	562.6
0.06692	554.9
0.06696	561.6
0.067	556
0.06704	561.4
0.06708	557.1
0.06712	561.1
0.06716	557.4
0.0672	561.3
0.06724	558.2
0.06728	561.5
0.06732	558.7
0.06736	562.4
0.0674	559.1
0.06744	561.8
0.06748	560.2
0.06752	561.4
0.06756	561.2
0.0676	559.8
0.06764	562.3
0.06768	558.5
0.06772	563.5
0.06776	556.8
0.0678	563.5
0.06784	555.7
0.06788	563.2
0.06792	555.2
0.06796	562.8
0.068	554.8
0.06804	562.2
0.06808	555.2
0.06812	561.6
0.06816	556.2
0.0682	561.2
0.06824	556.8
0.06828	561.1
0.06832	558
0.06836	561.2
0.0684	558.4
0.06844	561.4
0.06848	558.8
0.06852	562.1
0.06856	559.6
0.0686	561.7
0.06864	560.3
0.06868	560.9
0.06872	561.1
0.06876	559.7
0.0688	562.5
0.06884	558
0.06888	563.3
0.06892	556
0.06896	563.6
0.069	555.7
0.06904	563.2
0.06908	555
0.06912	562.5
0.06916	554.7
0.0692	561.8
0.06924	555.8
0.06928	561.2
0.06932	556.4
0.06936	561
0.0694	557
0.06944	561.4
0.06948	557.8
0.06952	561.9
0.06956	558.5
0.0696	561.5
0.06964	559
0.06968	561.8
0.06972	559.7
0.06976	561.5
0.0698	560.8
0.06984	560.6
0.06988	561.8
0.06992	558.6
0.06996	562.8
0.07	557.5
0.07004	563.2
0.07008	555.9
0.07012	564
0.07016	554.9
0.0702	562.8
0.07024	554.6
0.07028	561.9
0.07032	554.7
0.07036	561.5
0.0704	555.5
0.07044	561.4
0.07048	556.5
0.07052	561
0.07056	557.2
0.0706	561.3
0.07064	558
0.07068	561.5
0.07072	558.6
0.07076	561.8
0.0708	558.8
0.07084	561.8
0.07088	559.7
0.07092	561.3
0.07096	560.9
0.071	559.7
0.07104	562.1
0.07108	558.3
0.07112	563
0.07116	557
0.0712	563.4
0.07124	556
0.07128	563
0.07132	555.3
0.07136	562.8
0.0714	554.5
0.07144	562.2
0.07148	554.9
0.07152	561.7
0.07156	555.8
0.0716	561.2
0.07164	556.8
0.07168	560.9
0.07172	557.6
0.07176	561.3
0.0718	558.3
0.07184	561.4
0.07188	558.7
0.07192	561.9
0.07196	559.5
0.072	561.9
0.07204	559.8
0.07208	561.1
0.07212	561.1
0.07216	559.6
0.0722	562.5
0.07224	558.2
0.07228	563.2
0.07232	556.8
0.07236	563.1
0.0724	555.5
0.07244	563.2
0.07248	554.9
0.07252	562.7
0.07256	554.7
0.0726	562.1
0.07264	555.2
0.07268	561.4
0.07272	555.9
0.07276	561.1
0.0728	556.7
0.07284	561
0.07288	557.5
0.07292	561.3
0.07296	557.8
0.073	561.3
0.07304	558.3
0.07308	561.7
0.07312	559.3
0.07316	561.7
0.0732	559.8
0.07324	561.1
0.07328	561.1
0.07332	559.8
0.07336	562.2
0.0734	558.2
0.07344	562.9
0.07348	556.8
0.07352	563.2
0.07356	555
0.0736	563.4
0.07364	554.8
0.07368	562.8
0.07372	554.5
0.07376	562
0.0738	555.1
0.07384	561.2
0.07388	556
0.07392	561.1
0.07396	556.4
0.074	561.1
0.07404	557.3
0.07408	561.2
0.07412	558
0.07416	561.5
0.0742	558.4
0.07424	561.9
0.07428	559.4
0.07432	561.3
0.07436	559.7
0.0744	560.6
0.07444	561
0.07448	559.6
0.07452	562.1
0.07456	557.9
0.0746	562.9
0.07464	556.9
0.07468	563.3
0.07472	555.7
0.07476	563.2
0.0748	554.5
0.07484	562.6
0.07488	554.4
0.07492	561.9
0.07496	555.3
0.075	561.5
0.07504	555.9
0.07508	561.1
0.07512	556.7
0.07516	561.1
0.0752	557.6
0.07524	561.1
0.07528	558
0.07532	561.5
0.07536	558.7
0.0754	562
0.07544	559.3
0.07548	561.5
0.07552	560
0.07556	560.8
0.0756	561.2
0.07564	559.4
0.07568	562.1
0.07572	557.8
0.07576	563
0.0758	556.7
0.07584	563.3
0.07588	555.5
0.07592	563.2
0.07596	554.9
0.076	562.6
0.07604	554.8
0.07608	561.8
0.07612	555
0.07616	561.4
0.0762	556
0.07624	560.8
0.07628	556.7
0.07632	560.9
0.07636	557.5
0.0764	561.2
0.07644	558.1
0.07648	561.7
0.07652	558.8
0.07656	561.8
0.0766	559.3
0.07664	561.3
0.07668	560.4
0.07672	560.5
0.07676	561.5
0.0768	558.8
0.07684	562.6
0.07688	557.6
0.07692	563.3
0.07696	556.2
0.077	563.7
0.07704	555
0.07708	562.8
0.07712	554.6
0.07716	562.4
0.0772	554.8
0.07724	561.6
0.07728	555.6
0.07732	561.3
0.07736	556.2
0.0774	561.2
0.07744	557.1
0.07748	561.2
0.07752	557.8
0.07756	561.5
0.0776	558.6
0.07764	561.8
0.07768	558.8
0.07772	561.5
0.07776	559.7
0.0778	561.1
0.07784	560.8
0.07788	560.2
0.07792	562
0.07796	558.6
0.078	563
0.07804	557.1
0.07808	563.6
0.07812	555.7
0.07816	563.2
0.0782	554.8
0.07824	563.3
0.07828	554.6
0.07832	562.1
0.07836	555.3
0.0784	561.4
0.07844	555.9
0.07848	561.1
0.07852	556.7
0.07856	560.9
0.0786	557.5
0.07864	561.2
0.07868	558.4
0.07872	561.5
0.07876	558.3
0.0788	562.1
0.07884	559.2
0.07888	561.6
0.07892	560.3
0.07896	561
0.079	561
0.07904	559.7
0.07908	562.1
0.07912	558.2
0.07916	563.2
0.0792	556.6
0.07924	563.3
0.07928	555.5
0.07932	563.1
0.07936	554.9
0.0794	562.6
0.07944	554.9
0.07948	561.8
0.07952	555.3
0.07956	561.5
0.0796	556.3
0.07964	560.9
0.07968	557.4
0.07972	561
0.07976	558.1
0.0798	561.4
0.07984	557.8
0.07988	561.8
0.07992	558.9
[truncated: 98,001 more rows]

## Sheet: Sheet1
		100	50
time	data	butfilt1	Strain
0.437	306.6	304.882	-5.09764
0.43704	306.4	304.83	-5.09659
0.43708	305.1	304.776	-5.09553
0.43712	307.6	304.722	-5.09445
0.43716	303.5	304.668	-5.09335
0.4372	307.4	304.612	-5.09224
0.43724	302.2	304.556	-5.09111
0.43728	308	304.499	-5.08997
0.43732	301.5	304.441	-5.08882
0.43736	307.6	304.383	-5.08765
0.4374	301	304.323	-5.08647
0.43744	306.9	304.263	-5.08527
0.43748	301	304.203	-5.08406
0.43752	306	304.142	-5.08283
0.43756	301.2	304.08	-5.0816
0.4376	305.9	304.017	-5.08035
0.43764	301.4	303.954	-5.07908
0.43768	305.3	303.89	-5.0778
0.43772	301.8	303.826	-5.07651
0.43776	305.6	303.761	-5.07521
0.4378	301.9	303.695	-5.0739
0.43784	305.7	303.628	-5.07257
0.43788	302.4	303.561	-5.07123
0.43792	306	303.494	-5.06987
0.43796	302.5	303.425	-5.06851
0.438	305.7	303.357	-5.06713
0.43804	303	303.287	-5.06575
0.43808	304.8	303.217	-5.06435
0.43812	303.9	303.147	-5.06293
0.43816	303.3	303.076	-5.06151
0.4382	304.9	303.004	-5.06008
0.43824	302.1	302.932	-5.05863
0.43828	305.5	302.859	-5.05718
0.43832	300.7	302.786	-5.05571
0.43836	305.8	302.712	-5.05424
0.4384	299.4	302.638	-5.05275
0.43844	305.5	302.563	-5.05126
0.43848	298.9	302.488	-5.04975
0.43852	305.1	302.412	-5.04824
0.43856	298.6	302.336	-5.04671
0.4386	304.1	302.259	-5.04518
0.43864	298.8	302.182	-5.04364
0.43868	303.4	302.105	-5.04209
0.43872	298.8	302.027	-5.04053
0.43876	303.4	301.948	-5.03896
0.4388	299	301.869	-5.03739
0.43884	303.1	301.79	-5.03581
0.43888	299.3	301.711	-5.03422
0.43892	302.8	301.631	-5.03262
0.43896	300.4	301.551	-5.03101
0.439	302.9	301.47	-5.0294
0.43904	299.8	301.389	-5.02778
0.43908	303.1	301.307	-5.02615
0.43912	300.3	301.226	-5.02451
0.43916	302.7	301.144	-5.02287
0.4392	301	301.061	-5.02122
0.43924	302.1	300.979	-5.01957
0.43928	301.9	300.895	-5.01791
0.43932	300.3	300.812	-5.01624
0.43936	302.5	300.728	-5.01457
0.4394	299.4	300.644	-5.01289
0.43944	303.1	300.56	-5.0112
0.43948	297.5	300.476	-5.00951
0.43952	303.2	300.391	-5.00782
0.43956	296.9	300.306	-5.00612
0.4396	302.6	300.22	-5.00441
0.43964	295.9	300.135	-5.0027
0.43968	302.3	300.049	-5.00098
0.43972	296	299.963	-4.99926
0.43976	301.7	299.877	-4.99754
0.4398	296.4	299.79	-4.99581
0.43984	300.9	299.704	-4.99408
0.43988	296.7	299.617	-4.99234
0.43992	300.9	299.53	-4.9906
0.43996	296.5	299.443	-4.98885
0.44	300.8	299.355	-4.98711
0.44004	297.1	299.268	-4.98535
0.44008	300.6	299.18	-4.9836
0.44012	297.3	299.092	-4.98184
0.44016	301.1	299.004	-4.98008
0.4402	297.5	298.916	-4.97831
0.44024	300.6	298.827	-4.97655
0.44028	298	298.739	-4.97477
0.44032	299.7	298.65	-4.973
0.44036	298.9	298.561	-4.97122
0.4404	298.8	298.472	-4.96944
0.44044	299.8	298.383	-4.96766
0.44048	297.2	298.294	-4.96588
0.44052	300.3	298.205	-4.96409
0.44056	295.7	298.115	-4.9623
0.4406	301	298.026	-4.96051
0.44064	294.6	297.936	-4.95872
0.44068	300.5	297.846	-4.95692
0.44072	293.9	297.756	-4.95513
0.44076	300.1	297.666	-4.95333
0.4408	293.8	297.576	-4.95153
0.44084	299	297.486	-4.94973
0.44088	293.6	297.396	-4.94792
0.44092	298.8	297.306	-4.94612
0.44096	294.1	297.216	-4.94432
0.441	298.2	297.125	-4.94251
0.44104	294.4	297.035	-4.9407
0.44108	297.9	296.945	-4.93889
0.44112	294.5	296.854	-4.93708
0.44116	298.4	296.764	-4.93527
0.4412	294.8	296.673	-4.93346
0.44124	298.6	296.583	-4.93165
0.44128	295.1	296.492	-4.92984
0.44132	298.3	296.401	-4.92803
0.44136	295.4	296.311	-4.92621
0.4414	297.5	296.22	-4.9244
0.44144	296.1	296.129	-4.92258
0.44148	296.7	296.038	-4.92077
0.44152	296.9	295.947	-4.91895
0.44156	295.3	295.857	-4.91713
0.4416	298.1	295.766	-4.91532
0.44164	293.5	295.675	-4.9135
0.44168	298.5	295.584	-4.91168
0.44172	292.4	295.493	-4.90986
0.44176	298	295.402	-4.90804
0.4418	292.2	295.311	-4.90623
0.44184	297.6	295.22	-4.90441
0.44188	291.5	295.129	-4.90259
0.44192	297.3	295.039	-4.90077
0.44196	290.8	294.948	-4.89895
0.442	296.7	294.857	-4.89713
0.44204	291.3	294.766	-4.89532
0.44208	295.9	294.675	-4.8935
0.44212	291.7	294.584	-4.89168
0.44216	295.5	294.493	-4.88987
0.4422	291.8	294.403	-4.88805
0.44224	295.6	294.312	-4.88623
0.44228	292.1	294.221	-4.88442
0.44232	295.7	294.13	-4.8826
0.44236	292.8	294.039	-4.88079
0.4424	296.1	293.949	-4.87897
0.44244	292.5	293.858	-4.87716
0.44248	295.5	293.767	-4.87535
0.44252	293.5	293.677	-4.87353
0.44256	294.4	293.586	-4.87172
0.4426	294.5	293.495	-4.86991
0.44264	293.3	293.405	-4.86809
0.44268	295	293.314	-4.86628
0.44272	291.8	293.223	-4.86447
0.44276	295.7	293.133	-4.86266
0.4428	290.7	293.042	-4.86085
0.44284	296.2	292.952	-4.85904
0.44288	289.3	292.861	-4.85722
0.44292	295.3	292.771	-4.85542
0.44296	288.8	292.68	-4.85361
0.443	294.5	292.59	-4.8518
0.44304	288.9	292.499	-4.84999
0.44308	294	292.409	-4.84818
0.44312	289	292.319	-4.84637
0.44316	293.4	292.228	-4.84457
0.4432	289.5	292.138	-4.84276
0.44324	293.5	292.048	-4.84096
0.44328	289.4	291.958	-4.83915
0.44332	293.5	291.867	-4.83735
0.44336	289.3	291.777	-4.83554
0.4434	293.5	291.687	-4.83374
0.44344	290	291.597	-4.83194
0.44348	293.5	291.507	-4.83013
0.44352	290.3	291.417	-4.82833
0.44356	293.4	291.326	-4.82653
0.4436	290.6	291.236	-4.82473
0.44364	292.5	291.146	-4.82292
0.44368	291.8	291.056	-4.82112
0.44372	291.4	290.966	-4.81932
0.44376	292.8	290.876	-4.81752
0.4438	290.1	290.786	-4.81572
0.44384	293.2	290.696	-4.81392
0.44388	288.5	290.606	-4.81212
0.44392	293.8	290.516	-4.81032
0.44396	287.4	290.426	-4.80852
0.444	293.2	290.336	-4.80671
0.44404	286.6	290.246	-4.80491
0.44408	292.5	290.156	-4.80311
0.44412	286.3	290.066	-4.80131
0.44416	292.1	289.976	-4.79952
0.4442	286.2	289.886	-4.79772
0.44424	291.2	289.796	-4.79592
0.44428	287	289.706	-4.79412
0.44432	290.8	289.616	-4.79232
0.44436	286.9	289.526	-4.79052
0.4444	290.9	289.436	-4.78872
0.44444	287.3	289.346	-4.78692
0.44448	291	289.256	-4.78512
0.44452	287.6	289.166	-4.78333
0.44456	291.1	289.076	-4.78153
0.4446	287.8	288.986	-4.77973
0.44464	291	288.897	-4.77793
0.44468	288.1	288.807	-4.77613
0.44472	290.5	288.717	-4.77433
0.44476	289	288.627	-4.77253
0.4448	289.1	288.537	-4.77073
0.44484	289.9	288.447	-4.76893
0.44488	288.1	288.357	-4.76713
0.44492	290.6	288.267	-4.76533
0.44496	286.2	288.177	-4.76353
0.445	290.8	288.087	-4.76173
0.44504	285	287.997	-4.75993
0.44508	290.9	287.907	-4.75813
0.44512	284.7	287.816	-4.75633
0.44516	290.1	287.726	-4.75453
0.4452	284	287.636	-4.75273
0.44524	289.7	287.546	-4.75092
0.44528	284.1	287.456	-4.74912
0.44532	289.3	287.366	-4.74732
0.44536	284.3	287.276	-4.74552
0.4454	288.3	287.186	-4.74371
0.44544	284.4	287.095	-4.74191
0.44548	288.5	287.005	-4.7401
0.44552	284.6	286.915	-4.7383
0.44556	288.5	286.825	-4.7365
0.4456	284.9	286.735	-4.73469
0.44564	288.7	286.644	-4.73289
0.44568	285.3	286.554	-4.73108
0.44572	288.5	286.464	-4.72927
0.44576	285.6	286.373	-4.72747
0.4458	287.9	286.283	-4.72566
0.44584	286.2	286.193	-4.72385
0.44588	287	286.102	-4.72204
0.44592	287.1	286.012	-4.72023
0.44596	286.2	285.921	-4.71842
0.446	287.7	285.83	-4.71661
0.44604	284.5	285.74	-4.7148
0.44608	288.5	285.649	-4.71299
0.44612	283.2	285.559	-4.71117
0.44616	288.8	285.468	-4.70936
0.4462	282.4	285.377	-4.70754
0.44624	287.8	285.286	-4.70573
0.44628	281.5	285.196	-4.70391
0.44632	287.4	285.105	-4.70209
0.44636	281.7	285.014	-4.70028
0.4464	286.9	284.923	-4.69846
0.44644	281.7	284.832	-4.69664
0.44648	286.3	284.741	-4.69482
0.44652	282.1	284.65	-4.693
0.44656	286.4	284.559	-4.69118
0.4466	282.1	284.468	-4.68936
0.44664	285.9	284.377	-4.68754
0.44668	282.3	284.286	-4.68571
0.44672	286.1	284.194	-4.68389
0.44676	282.5	284.103	-4.68206
0.4468	286.4	284.012	-4.68024
0.44684	282.7	283.921	-4.67841
0.44688	285.9	283.829	-4.67658
0.44692	283.3	283.738	-4.67476
0.44696	285	283.646	-4.67293
0.447	284.7	283.555	-4.6711
0.44704	283.8	283.463	-4.66927
0.44708	285.1	283.372	-4.66743
0.44712	282.4	283.28	-4.6656
0.44716	285.3	283.188	-4.66377
0.4472	281.3	283.097	-4.66193
0.44724	285.6	283.005	-4.6601
0.44728	279.8	282.913	-4.65826
0.44732	285.6	282.821	-4.65643
0.44736	279.3	282.729	-4.65459
0.4474	285.1	282.637	-4.65275
0.44744	278.9	282.545	-4.65091
0.44748	284.3	282.453	-4.64907
0.44752	279	282.361	-4.64723
0.44756	283.6	282.269	-4.64539
0.4476	279.2	282.177	-4.64355
0.44764	283.6	282.085	-4.6417
0.44768	279.6	281.993	-4.63986
0.44772	283.1	281.901	-4.63801
0.44776	279.9	281.808	-4.63617
0.4478	283.6	281.716	-4.63432
0.44784	279.7	281.624	-4.63248
0.44788	284	281.531	-4.63063
0.44792	280.3	281.439	-4.62878
0.44796	283.4	281.347	-4.62693
0.448	280.6	281.254	-4.62508
0.44804	283.1	281.161	-4.62323
0.44808	281.5	281.069	-4.62138
0.44812	281.6	280.976	-4.61952
0.44816	282.5	280.883	-4.61767
0.4482	280.2	280.791	-4.61581
0.44824	283.1	280.698	-4.61396
0.44828	278.8	280.605	-4.6121
0.44832	283.6	280.512	-4.61024
0.44836	277.4	280.419	-4.60838
0.4484	283.1	280.326	-4.60652
0.44844	276.6	280.233	-4.60466
0.44848	282.8	280.14	-4.6028
0.44852	276.5	280.047	-4.60094
0.44856	281.8	279.954	-4.59907
0.4486	276.3	279.86	-4.59721
0.44864	281.6	279.767	-4.59534
0.44868	277.1	279.674	-4.59348
0.44872	281	279.581	-4.59161
0.44876	277.1	279.487	-4.58974
0.4488	280.7	279.394	-4.58788
0.44884	277	279.3	-4.58601
0.44888	281.1	279.207	-4.58414
0.44892	277.4	279.113	-4.58227
0.44896	281.1	279.02	-4.5804
0.449	277.9	278.926	-4.57852
0.44904	280.7	278.833	-4.57665
0.44908	278.1	278.739	-4.57478
0.44912	280.7	278.645	-4.5729
0.44916	278.8	278.551	-4.57103
0.4492	279.5	278.457	-4.56915
0.44924	280	278.364	-4.56727
0.44928	277.8	278.27	-4.56539
0.44932	280.3	278.176	-4.56351
0.44936	276.4	278.082	-4.56163
0.4494	280.8	277.988	-4.55975
0.44944	275.4	277.893	-4.55787
0.44948	280.8	277.799	-4.55599
0.44952	274.4	277.705	-4.5541
0.44956	281	277.611	-4.55222
0.4496	273.6	277.517	-4.55033
0.44964	279.9	277.422	-4.54845
0.44968	273.7	277.328	-4.54656
0.44972	278.7	277.234	-4.54468
0.44976	274.3	277.139	-4.54279
0.4498	278.5	277.045	-4.5409
0.44984	273.8	276.951	-4.53901
0.44988	278.2	276.856	-4.53712
0.44992	274.3	276.762	-4.53524
0.44996	278.4	276.667	-4.53335
0.45	274.5	276.573	-4.53146
0.45004	278.2	276.478	-4.52957
0.45008	274.9	276.384	-4.52767
0.45012	278.4	276.289	-4.52578
0.45016	275.4	276.195	-4.52389
0.4502	278.1	276.1	-4.522
0.45024	275.8	276.005	-4.5201
0.45028	277.6	275.911	-4.51821
0.45032	276.7	275.816	-4.51632
0.45036	275.9	275.721	-4.51442
0.4504	277.3	275.626	-4.51252
0.45044	274.7	275.531	-4.51063
0.45048	277.7	275.437	-4.50873
0.45052	273.2	275.342	-4.50683
0.45056	278.5	275.247	-4.50494
0.4506	271.9	275.152	-4.50304
0.45064	277.8	275.057	-4.50114
0.45068	271.5	274.962	-4.49924
0.45072	277.3	274.867	-4.49734
0.45076	271.2	274.772	-4.49544
0.4508	276.6	274.677	-4.49355
0.45084	271.2	274.582	-4.49165
0.45088	276.3	274.487	-4.48975
0.45092	271.1	274.392	-4.48785
0.45096	275.8	274.297	-4.48595
0.451	271.8	274.202	-4.48405
0.45104	275.5	274.107	-4.48215
0.45108	272	274.012	-4.48025
0.45112	275.7	273.917	-4.47835
0.45116	272.2	273.822	-4.47645
0.4512	275.7	273.727	-4.47455
0.45124	272.1	273.632	-4.47265
0.45128	275.5	273.537	-4.47074
0.45132	272.6	273.442	-4.46884
0.45136	275.2	273.347	-4.46694
0.4514	273.4	273.252	-4.46504
0.45144	274	273.157	-4.46314
0.45148	274.3	273.062	-4.46124
0.45152	272.7	272.967	-4.45934
0.45156	275.1	272.872	-4.45743
0.4516	271.1	272.777	-4.45553
0.45164	275.5	272.682	-4.45363
0.45168	269.9	272.586	-4.45173
0.45172	275.3	272.491	-4.44983
0.45176	268.8	272.396	-4.44792
0.4518	275	272.301	-4.44602
0.45184	268.5	272.206	-4.44412
0.45188	274.2	272.111	-4.44222
0.45192	268.7	272.016	-4.44032
0.45196	273.5	271.921	-4.43842
0.452	268.9	271.826	-4.43651
0.45204	273.3	271.731	-4.43461
0.45208	268.6	271.636	-4.43271
0.45212	273	271.541	-4.43081
0.45216	269.2	271.446	-4.42891
0.4522	272.8	271.351	-4.42701
0.45224	269.7	271.256	-4.42511
0.45228	273	271.161	-4.42321
0.45232	269.9	271.066	-4.42131
0.45236	273	270.971	-4.41941
0.4524	269.9	270.876	-4.41751
0.45244	272.7	270.781	-4.41561
0.45248	270.6	270.686	-4.41372
0.45252	272.2	270.591	-4.41182
0.45256	271.4	270.496	-4.40992
0.4526	270.4	270.401	-4.40802
0.45264	271.7	270.306	-4.40612
0.45268	269.4	270.211	-4.40422
0.45272	272.5	270.116	-4.40232
0.45276	267.9	270.021	-4.40042
0.4528	272.9	269.926	-4.39853
0.45284	266.8	269.831	-4.39663
0.45288	272.5	269.737	-4.39473
0.45292	266.4	269.642	-4.39283
0.45296	271.6	269.547	-4.39094
0.453	265.8	269.452	-4.38904
0.45304	271.4	269.357	-4.38715
0.45308	265.8	269.263	-4.38525
0.45312	270.4	269.168	-4.38336
0.45316	266.2	269.073	-4.38146
0.4532	270.4	268.978	-4.37957
0.45324	266.2	268.884	-4.37767
0.45328	270.1	268.789	-4.37578
0.45332	267.1	268.694	-4.37389
0.45336	270.3	268.6	-4.372
0.4534	266.8	268.505	-4.37011
0.45344	270.6	268.411	-4.36822
0.45348	267.2	268.316	-4.36633
0.45352	270	268.222	-4.36443
0.45356	267.4	268.127	-4.36255
0.4536	269.6	268.033	-4.36066
0.45364	268.2	267.938	-4.35877
0.45368	268.6	267.844	-4.35688
0.45372	269	267.75	-4.35499
0.45376	267.2	267.655	-4.3531
0.4538	269.7	267.561	-4.35121
0.45384	265.7	267.466	-4.34933
0.45388	270.3	267.372	-4.34744
0.45392	265.1	267.278	-4.34555
0.45396	269.9	267.183	-4.34367
0.454	263.5	267.089	-4.34178
0.45404	269.6	266.995	-4.3399
0.45408	263.1	266.901	-4.33802
0.45412	268.6	266.807	-4.33613
0.45416	263.1	266.712	-4.33425
0.4542	268	266.618	-4.33237
0.45424	263.3	266.524	-4.33049
0.45428	267.8	266.43	-4.32861
0.45432	263.7	266.336	-4.32673
0.45436	267.6	266.242	-4.32485
0.4544	264.4	266.148	-4.32297
0.45444	267.4	266.054	-4.32109
0.45448	264.3	265.961	-4.31921
0.45452	267.9	265.867	-4.31733
0.45456	264.2	265.773	-4.31546
0.4546	267.8	265.679	-4.31358
0.45464	264.5	265.585	-4.31171
0.45468	267.3	265.492	-4.30983
0.45472	265.3	265.398	-4.30796
0.45476	266.3	265.304	-4.30608
0.4548	266.4	265.21	-4.30421
0.45484	265	265.117	-4.30233
0.45488	267	265.023	-4.30046
0.45492	263.6	264.929	-4.29859
0.45496	267.4	264.836	-4.29672
0.455	262.1	264.742	-4.29484
0.45504	267.5	264.649	-4.29297
0.45508	261.3	264.555	-4.2911
0.45512	267.4	264.461	-4.28923
0.45516	260.8	264.368	-4.28736
0.4552	266.4	264.274	-4.28549
0.45524	260.6	264.181	-4.28362
0.45528	265.8	264.088	-4.28175
0.45532	260.9	263.994	-4.27988
0.45536	265.4	263.901	-4.27801
0.4554	261	263.807	-4.27615
0.45544	265	263.714	-4.27428
0.45548	261	263.621	-4.27241
0.45552	265.2	263.527	-4.27055
0.45556	261.9	263.434	-4.26868
0.4556	265.3	263.341	-4.26682
0.45564	261.6	263.248	-4.26495
0.45568	265.1	263.154	-4.26309
0.45572	262.3	263.061	-4.26122
0.45576	264.8	262.968	-4.25936
0.4558	262.5	262.875	-4.2575
0.45584	264.2	262.782	-4.25563
0.45588	263.6	262.688	-4.25377
0.45592	262.8	262.595	-4.25191
0.45596	264.3	262.502	-4.25004
0.456	261.4	262.409	-4.24818
0.45604	264.6	262.316	-4.24632
0.45608	260.3	262.223	-4.24445
0.45612	264.5	262.13	-4.24259
0.45616	259	262.036	-4.24073
0.4562	264.5	261.943	-4.23887
0.45624	258.4	261.85	-4.237
0.45628	264	261.757	-4.23514
0.45632	258.3	261.664	-4.23328
0.45636	263.2	261.571	-4.23142
0.4564	258.4	261.478	-4.22956
0.45644	262.9	261.385	-4.2277
0.45648	258.4	261.292	-4.22584
0.45652	262.2	261.199	-4.22398
0.45656	259.1	261.106	-4.22212
0.4566	262.3	261.013	-4.22026
0.45664	259	260.92	-4.2184
0.45668	262.5	260.827	-4.21654
0.45672	259.1	260.734	-4.21468
0.45676	262.6	260.641	-4.21282
0.4568	259.3	260.548	-4.21096
0.45684	262.7	260.455	-4.2091
0.45688	259.7	260.362	-4.20724
0.45692	262.1	260.269	-4.20538
0.45696	260.6	260.176	-4.20352
0.457	260.8	260.083	-4.20166
0.45704	261.4	259.99	-4.1998
0.45708	259.7	259.897	-4.19793
0.45712	262.2	259.804	-4.19607
0.45716	258.2	259.711	-4.19421
0.4572	262.3	259.617	-4.19235
0.45724	257	259.524	-4.19049
0.45728	262.1	259.431	-4.18863
0.45732	255.9	259.338	-4.18676
0.45736	261.3	259.245	-4.1849
0.4574	255.8	259.152	-4.18304
0.45744	260.9	259.059	-4.18118
0.45748	255.7	258.966	-4.17931
0.45752	260.6	258.873	-4.17745
0.45756	255.6	258.779	-4.17559
0.4576	260.1	258.686	-4.17372
0.45764	256.1	258.593	-4.17186
0.45768	260	258.5	-4.17
0.45772	256.3	258.407	-4.16813
0.45776	259.7	258.314	-4.16627
0.4578	256.6	258.22	-4.16441
0.45784	259.9	258.127	-4.16254
0.45788	257	258.034	-4.16068
0.45792	259.9	257.941	-4.15881
0.45796	257.1	257.847	-4.15695
0.458	259.7	257.754	-4.15508
0.45804	257.5	257.661	-4.15321
0.45808	258.8	257.567	-4.15135
0.45812	258.6	257.474	-4.14948
0.45816	257.4	257.381	-4.14761
0.4582	259	257.287	-4.14574
0.45824	256.2	257.194	-4.14387
0.45828	259.7	257.1	-4.14201
0.45832	254.9	257.007	-4.14014
0.45836	259.4	256.913	-4.13827
0.4584	253.8	256.82	-4.13639
0.45844	259.4	256.726	-4.13452
0.45848	253.2	256.633	-4.13265
0.45852	258.8	256.539	-4.13078
0.45856	253.2	256.445	-4.12891
0.4586	258.1	256.352	-4.12703
0.45864	252.7	256.258	-4.12516
0.45868	257.8	256.164	-4.12329
0.45872	253.2	256.071	-4.12141
0.45876	257.6	255.977	-4.11954
0.4588	253.3	255.883	-4.11767
0.45884	257.2	255.79	-4.11579
0.45888	253.7	255.696	-4.11392
0.45892	257.1	255.602	-4.11204
0.45896	254.1	255.508	-4.11016
0.459	257.1	255.414	-4.10829
0.45904	254.2	255.32	-4.10641
0.45908	256.8	255.227	-4.10453
0.45912	254.7	255.133	-4.10265
0.45916	256.3	255.039	-4.10077
0.4592	255.5	254.945	-4.09889
0.45924	255.2	254.851	-4.09701
0.45928	256.5	254.756	-4.09513
0.45932	254.2	254.662	-4.09325
0.45936	256.9	254.568	-4.09136
0.4594	252.4	254.474	-4.08948
0.45944	257.7	254.38	-4.08759
0.45948	251.5	254.285	-4.08571
0.45952	256.8	254.191	-4.08382
0.45956	250.6	254.097	-4.08193
0.4596	256.8	254.002	-4.08005
0.45964	250.3	253.908	-4.07816
0.45968	256	253.813	-4.07627
0.45972	250.6	253.719	-4.07438
0.45976	255.4	253.624	-4.07249
0.4598	250.5	253.53	-4.0706
0.45984	255.1	253.435	-4.06871
0.45988	251.1	253.341	-4.06681
0.45992	254.4	253.246	-4.06492
0.45996	250.9	253.151	-4.06302
0.46	254.6	253.056	-4.06113
0.46004	250.9	252.962	-4.05923
0.46008	254.9	252.867	-4.05734
0.46012	251.4	252.772	-4.05544
0.46016	255.1	252.677	-4.05354
0.4602	251.9	252.582	-4.05164
0.46024	254.5	252.487	-4.04974
0.46028	252.5	252.392	-4.04784
0.46032	253.2	252.297	-4.04593
0.46036	253.6	252.202	-4.04403
0.4604	251.9	252.106	-4.04213
0.46044	254.3	252.011	-4.04022
0.46048	250.7	251.916	-4.03831
0.46052	254.6	251.82	-4.0364
0.46056	249.3	251.725	-4.0345
0.4606	254.4	251.629	-4.03259
0.46064	248.6	251.534	-4.03067
0.46068	254	251.438	-4.02876
0.46072	247.9	251.342	-4.02685
0.46076	253.6	251.247	-4.02494
0.4608	247.7	251.151	-4.02302
0.46084	253.1	251.055	-4.02111
0.46088	248.2	250.959	-4.01919
0.46092	252.4	250.864	-4.01727
0.46096	247.8	250.768	-4.01535
0.461	252.1	250.672	-4.01344
0.46104	248.1	250.576	-4.01152
0.46108	251.6	250.48	-4.0096
0.46112	248.2	250.384	-4.00767
0.46116	252.1	250.288	-4.00575
0.4612	248.7	250.191	-4.00383
0.46124	252.2	250.095	-4.00191
0.46128	248.7	249.999	-3.99998
0.46132	251.9	249.903	-3.99805
0.46136	249.3	249.806	-3.99613
0.4614	251.4	249.71	-3.9942
0.46144	250.8	249.614	-3.99227
0.46148	250.1	249.517	-3.99034
0.46152	250.9	249.421	-3.98841
0.46156	248.6	249.324	-3.98648
0.4616	251.6	249.227	-3.98455
0.46164	247.4	249.131	-3.98261
0.46168	251.9	249.034	-3.98068
0.46172	246	248.937	-3.97874
0.46176	251.8	248.84	-3.97681
0.4618	245.4	248.743	-3.97487
0.46184	251	248.646	-3.97293
0.46188	245.2	248.55	-3.97099
0.46192	250.3	248.453	-3.96905
0.46196	245.4	248.356	-3.96711
0.462	249.7	248.259	-3.96517
0.46204	244.9	248.161	-3.96323
0.46208	249.7	248.064	-3.96129
0.46212	245.3	247.967	-3.95934
0.46216	249.3	247.87	-3.9574
0.4622	245.4	247.773	-3.95546
0.46224	249.3	247.676	-3.95351
0.46228	245.8	247.578	-3.95157
0.46232	249.4	247.481	-3.94962
0.46236	246.3	247.384	-3.94767
0.4624	249.2	247.286	-3.94572
0.46244	246.5	247.189	-3.94378
0.46248	248.8	247.091	-3.94183
0.46252	246.8	246.994	-3.93988
0.46256	248	246.896	-3.93792
0.4626	247.8	246.799	-3.93597
0.46264	246.7	246.701	-3.93402
0.46268	248.7	246.603	-3.93207
0.46272	245.4	246.506	-3.93011
0.46276	248.7	246.408	-3.92816
0.4628	244.1	246.31	-3.9262
0.46284	249	246.212	-3.92425
0.46288	243	246.114	-3.92229
0.46292	249	246.017	-3.92033
0.46296	242.8	245.919	-3.91837
0.463	247.9	245.821	-3.91641
0.46304	242	245.723	-3.91446
0.46308	247.3	245.625	-3.9125
0.46312	242.3	245.527	-3.91054
0.46316	246.5	245.429	-3.90857
0.4632	242.6	245.331	-3.90661
0.46324	246.4	245.233	-3.90465
0.46328	242.8	245.135	-3.90269
0.46332	246.7	245.036	-3.90073
0.46336	242.6	244.938	-3.89877
0.4634	246.8	244.84	-3.8968
0.46344	243.4	244.742	-3.89484
0.46348	246.9	244.644	-3.89287
0.46352	243.2	244.545	-3.89091
0.46356	246.6	244.447	-3.88894
0.4636	244	244.349	-3.88698
0.46364	245	244.25	-3.88501
0.46368	244.8	244.152	-3.88304
0.46372	244.7	244.054	-3.88107
0.46376	245.5	243.955	-3.87911
0.4638	243.5	243.857	-3.87714
0.46384	246.1	243.758	-3.87517
0.46388	241.8	243.66	-3.8732
0.46392	246.3	243.561	-3.87122
0.46396	240.7	243.463	-3.86925
0.464	246.2	243.364	-3.86728
0.46404	240	243.265	-3.86531
0.46408	245.3	243.167	-3.86334
0.46412	239.6	243.068	-3.86136
0.46416	244.9	242.969	-3.85939
0.4642	239.7	242.871	-3.85741
0.46424	244.2	242.772	-3.85544
0.46428	240.1	242.673	-3.85346
0.46432	244.2	242.574	-3.85149
0.46436	240.1	242.476	-3.84951
0.4644	243.5	242.377	-3.84754
0.46444	240	242.278	-3.84556
0.46448	243.6	242.179	-3.84359
0.46452	240.5	242.08	-3.84161
0.46456	244	241.982	-3.83963
0.4646	240.5	241.883	-3.83765
0.46464	243.8	241.784	-3.83568
0.46468	240.6	241.685	-3.8337
0.46472	243.6	241.586	-3.83172
0.46476	241.4	241.487	-3.82974
0.4648	242.5	241.388	-3.82776
0.46484	242.3	241.289	-3.82578
0.46488	241	241.19	-3.8238
0.46492	242.9	241.091	-3.82182
0.46496	239.3	240.992	-3.81984
0.465	243.5	240.893	-3.81785
0.46504	238.3	240.794	-3.81587
0.46508	243.7	240.694	-3.81389
0.46512	237.6	240.595	-3.8119
0.46516	243.1	240.496	-3.80992
0.4652	237	240.397	-3.80794
0.46524	242.2	240.298	-3.80595
0.46528	236.8	240.198	-3.80397
0.46532	242	240.099	-3.80198
0.46536	236.8	240	-3.8
0.4654	241.4	239.901	-3.79801
0.46544	237	239.801	-3.79603
0.46548	241	239.702	-3.79404
0.46552	237.2	239.603	-3.79206
0.46556	241	239.504	-3.79007
0.4656	237.5	239.404	-3.78808
0.46564	241.3	239.305	-3.7861
0.46568	237.5	239.205	-3.78411
0.46572	241.2	239.106	-3.78212
0.46576	238.1	239.007	-3.78013
0.4658	240.6	238.907	-3.77815
0.46584	238.6	238.808	-3.77616
0.46588	240	238.708	-3.77417
0.46592	239.3	238.609	-3.77218
0.46596	238.8	238.509	-3.77019
0.466	240.2	238.41	-3.7682
0.46604	237.3	238.31	-3.76621
0.46608	240.5	238.211	-3.76421
0.46612	235.7	238.111	-3.76222
0.46616	240.7	238.011	-3.76023
0.4662	235	237.912	-3.75824
0.46624	240.9	237.812	-3.75624
0.46628	234.3	237.713	-3.75425
0.46632	239.8	237.613	-3.75226
0.46636	234.2	237.513	-3.75026
0.4664	238.8	237.413	-3.74827
0.46644	234	237.314	-3.74627
0.46648	238.7	237.214	-3.74428
0.46652	234.3	237.114	-3.74228
0.46656	238.1	237.014	-3.74029
0.4666	234.6	236.914	-3.73829
0.46664	238.1	236.815	-3.73629
0.46668	235.2	236.715	-3.7343
0.46672	238.2	236.615	-3.7323
0.46676	234.9	236.515	-3.7303
0.4668	238.9	236.415	-3.7283
0.46684	234.8	236.315	-3.7263
0.46688	238.3	236.215	-3.7243
0.46692	235.7	236.115	-3.7223
0.46696	237.5	236.015	-3.7203
0.467	236.1	235.915	-3.7183
0.46704	236.6	235.815	-3.7163
0.46708	237.6	235.715	-3.7143
0.46712	235.5	235.615	-3.71229
0.46716	237.8	235.514	-3.71029
0.4672	233.8	235.414	-3.70829
0.46724	238.2	235.314	-3.70628
0.46728	232.2	235.214	-3.70427
0.46732	237.7	235.113	-3.70227
0.46736	231.6	235.013	-3.70026
0.4674	237.4	234.913	-3.69825
0.46744	231.5	234.812	-3.69624
0.46748	236.7	234.712	-3.69424
0.46752	231.3	234.611	-3.69223
0.46756	236.6	234.511	-3.69022
0.4676	231	234.41	-3.68821
0.46764	236	234.31	-3.6862
0.46768	231.9	234.209	-3.68419
0.46772	235.5	234.109	-3.68218
0.46776	231.7	234.008	-3.68016
0.4678	235.5	233.908	-3.67815
0.46784	232	233.807	-3.67614
0.46788	235.6	233.706	-3.67413
0.46792	232.3	233.606	-3.67211
0.46796	235.6	233.505	-3.6701
0.468	232.6	233.404	-3.66808
0.46804	235.3	233.303	-3.66607
0.46808	233.1	233.203	-3.66405
0.46812	234.4	233.102	-3.66203
0.46816	233.9	233.001	-3.66002
0.4682	233.3	232.9	-3.658
0.46824	234.7	232.799	-3.65598
0.46828	231.5	232.698	-3.65396
0.46832	235.2	232.597	-3.65194
0.46836	230.3	232.496	-3.64992
0.4684	235.2	232.395	-3.6479
0.46844	229.5	232.294	-3.64588
0.46848	234.7	232.193	-3.64385
0.46852	228.4	232.092	-3.64183
0.46856	234.3	231.99	-3.63981
0.4686	228.6	231.889	-3.63779
0.46864	233.4	231.788	-3.63576
0.46868	228.7	231.687	-3.63374
0.46872	232.8	231.586	-3.63171
0.46876	228.8	231.484	-3.62969
0.4688	232.8	231.383	-3.62766
0.46884	228.6	231.282	-3.62564
0.46888	233	231.181	-3.62361
0.46892	229.4	231.079	-3.62159
0.46896	232.5	230.978	-3.61956
0.469	229.4	230.877	-3.61753
0.46904	232.6	230.775	-3.61551
0.46908	229.4	230.674	-3.61348
0.46912	232.8	230.573	-3.61145
0.46916	230.1	230.471	-3.60943
0.4692	231.9	230.37	-3.6074
0.46924	230.6	230.268	-3.60537
0.46928	230.7	230.167	-3.60334
0.46932	232.1	230.065	-3.60131
0.46936	229.3	229.964	-3.59928
0.4694	231.9	229.862	-3.59725
0.46944	228	229.761	-3.59522
0.46948	232.2	229.659	-3.59319
0.46952	226.8	229.558	-3.59115
0.46956	232.1	229.456	-3.58912
0.4696	226	229.355	-3.58709
0.46964	231.7	229.253	-3.58506
0.46968	225.8	229.151	-3.58303
0.46972	231	229.05	-3.58099
0.46976	226	228.948	-3.57896
0.4698	230.2	228.846	-3.57693
0.46984	225.9	228.745	-3.5749
0.46988	229.8	228.643	-3.57287
0.46992	226.2	228.542	-3.57083
0.46996	229.8	228.44	-3.5688
0.47	226.4	228.338	-3.56677
0.47004	229.9	228.237	-3.56473
0.47008	226.3	228.135	-3.5627
0.47012	229.9	228.033	-3.56067
0.47016	226.7	227.932	-3.55864
0.4702	229.6	227.83	-3.5566
0.47024	226.8	227.729	-3.55457
0.47028	229.3	227.627	-3.55254
0.47032	227.6	227.525	-3.5505
0.47036	228.3	227.423	-3.54847
0.4704	228.5	227.322	-3.54644
0.47044	227.1	227.22	-3.5444
0.47048	229.1	227.118	-3.54237
0.47052	225.1	227.017	-3.54033
0.47056	229.7	226.915	-3.5383
0.4706	224.8	226.813	-3.53627
0.47064	229.2	226.712	-3.53423
0.47068	223.6	226.61	-3.5322
0.47072	229	226.508	-3.53016
0.47076	223.1	226.406	-3.52813
0.4708	228.5	226.305	-3.52609
0.47084	222.7	226.203	-3.52406
0.47088	227.6	226.101	-3.52203
0.47092	223.1	226	-3.51999
0.47096	227.1	225.898	-3.51796
0.471	223	225.796	-3.51593
0.47104	227.2	225.695	-3.51389
0.47108	223.1	225.593	-3.51186
0.47112	226.9	225.491	-3.50983
0.47116	223.3	225.39	-3.50779
0.4712	226.9	225.288	-3.50576
0.47124	223.7	225.186	-3.50373
0.47128	227.3	225.085	-3.5017
0.47132	223.7	224.983	-3.49966
0.47136	227.2	224.882	-3.49763
0.4714	224	224.78	-3.4956
0.47144	226	224.678	-3.49357
0.47148	225	224.577	-3.49153
0.47152	225.1	224.475	-3.4895
0.47156	226	224.373	-3.48747
0.4716	223.6	224.272	-3.48543
0.47164	226.4	224.17	-3.4834
0.47168	222.4	224.068	-3.48137
0.47172	226.7	223.967	-3.47933
0.47176	221.3	223.865	-3.4773
0.4718	227	223.763	-3.47527
0.47184	220.4	223.662	-3.47323
0.47188	226.2	223.56	-3.4712
0.47192	220.1	223.458	-3.46917
0.47196	225.2	223.357	-3.46713
0.472	220.2	223.255	-3.4651
0.47204	224.7	223.153	-3.46307
0.47208	220	223.052	-3.46104
0.47212	224.3	222.95	-3.45901
0.47216	220	222.849	-3.45697
0.4722	224.3	222.747	-3.45494
0.47224	220.4	222.646	-3.45291
0.47228	224.2	222.544	-3.45088
0.47232	220.5	222.442	-3.44885
0.47236	224.2	222.341	-3.44682
0.4724	220.7	222.239	-3.44478
0.47244	224	222.138	-3.44275
0.47248	221.6	222.036	-3.44072
0.47252	223.6	221.935	-3.43869
0.47256	221.8	221.833	-3.43666
0.4726	223.4	221.731	-3.43463
0.47264	222.5	221.63	-3.4326
0.47268	221.6	221.528	-3.43057
0.47272	223.2	221.427	-3.42854
0.47276	220.4	221.325	-3.42651
0.4728	223.6	221.224	-3.42447
0.47284	219.2	221.122	-3.42244
0.47288	223.8	221.021	-3.42041
0.47292	218.1	220.919	-3.41838
0.47296	223.6	220.818	-3.41635
0.473	217.4	220.716	-3.41432
0.47304	222.8	220.615	-3.41229
0.47308	217.4	220.513	-3.41026
0.47312	222.3	220.412	-3.40823
0.47316	217.4	220.31	-3.4062
0.4732	221.7	220.209	-3.40418
0.47324	217.3	220.107	-3.40215
0.47328	221.3	220.006	-3.40012
0.47332	217.8	219.905	-3.39809
0.47336	221.2	219.803	-3.39606
0.4734	217.6	219.702	-3.39404
0.47344	221.5	219.601	-3.39201
0.47348	218	219.499	-3.38999
0.47352	221.5	219.398	-3.38796
0.47356	217.9	219.297	-3.38594
0.4736	221.2	219.196	-3.38391
0.47364	218.4	219.094	-3.38189
0.47368	220.5	218.993	-3.37986
0.47372	219	218.892	-3.37784
0.47376	219.2	218.791	-3.37581
0.4738	219.9	218.69	-3.37379
0.47384	218.5	218.588	-3.37177
0.47388	220.4	218.487	-3.36975
0.47392	216.7	218.386	-3.36773
0.47396	221.3	218.285	-3.3657
0.474	215.7	218.184	-3.36368
0.47404	221	218.083	-3.36166
0.47408	214.8	217.982	-3.35964
0.47412	220.2	217.881	-3.35762
0.47416	214.4	217.78	-3.35561
0.4742	219.6	217.679	-3.35359
0.47424	214	217.579	-3.35157
0.47428	219.2	217.478	-3.34956
0.47432	214.1	217.377	-3.34754
0.47436	218.5	217.276	-3.34553
0.4744	214.3	217.176	-3.34351
0.47444	218.1	217.075	-3.3415
0.47448	214.8	216.974	-3.33949
0.47452	218.4	216.874	-3.33748
0.47456	214.6	216.773	-3.33547
0.4746	218.1	216.673	-3.33346
0.47464	214.8	216.573	-3.33145
0.47468	218.6	216.472	-3.32944
0.47472	215.1	216.372	-3.32744
0.47476	218	216.271	-3.32543
0.4748	215.8	216.171	-3.32342
0.47484	217.6	216.071	-3.32142
0.47488	216.5	215.971	-3.31941
0.47492	216.1	215.87	-3.31741
0.47496	217.5	215.77	-3.3154
0.475	215.1	215.67	-3.3134
0.47504	217.9	215.57	-3.3114
0.47508	213.7	215.47	-3.3094
0.47512	217.9	215.37	-3.3074
0.47516	212.5	215.27	-3.3054
0.4752	217.8	215.17	-3.3034
0.47524	211.9	215.07	-3.3014
0.47528	217.3	214.97	-3.2994
0.47532	211.5	214.87	-3.2974
0.47536	216.3	214.77	-3.2954
0.4754	211.7	214.67	-3.29341
0.47544	215.9	214.571	-3.29141
0.47548	211.3	214.471	-3.28942
0.47552	215.6	214.371	-3.28742
0.47556	211.6	214.272	-3.28543
0.4756	215.7	214.172	-3.28344
0.47564	211.6	214.072	-3.28145
0.47568	215.5	213.973	-3.27945
0.47572	212.2	213.873	-3.27746
0.47576	215.5	213.774	-3.27547
0.4758	212.3	213.674	-3.27349
0.47584	215.7	213.575	-3.2715
0.47588	212.7	213.475	-3.26951
0.47592	215	213.376	-3.26752
0.47596	213.3	213.277	-3.26553
0.476	213.9	213.177	-3.26354
0.47604	214.3	213.078	-3.26156
0.47608	212.7	212.979	-3.25957
0.47612	215	212.879	-3.25758
0.47616	211.6	212.78	-3.2556
0.4762	214.9	212.681	-3.25361
0.47624	210.2	212.581	-3.25163
0.47628	215.1	212.482	-3.24964
0.47632	209.3	212.383	-3.24766
0.47636	214.9	212.284	-3.24567
0.4764	208.6	212.184	-3.24369
0.47644	214.3	212.085	-3.24171
0.47648	208.7	211.986	-3.23972
0.47652	213.3	211.887	-3.23774
0.47656	208.8	211.788	-3.23576
0.4766	213.2	211.689	-3.23377
0.47664	208.9	211.59	-3.23179
0.47668	212.7	211.491	-3.22981
0.47672	209.2	211.391	-3.22783
0.47676	212.5	211.292	-3.22585
0.4768	209.1	211.193	-3.22387
0.47684	213.1	211.094	-3.22188
0.47688	209.5	210.995	-3.2199
0.47692	212.9	210.896	-3.21792
0.47696	209.8	210.797	-3.21594
0.477	212.4	210.698	-3.21396
0.47704	210.3	210.599	-3.21198
0.47708	211.9	210.5	-3.21
0.47712	210.9	210.401	-3.20801
0.47716	210.7	210.302	-3.20603
0.4772	211.8	210.202	-3.20405
0.47724	209.1	210.103	-3.20207
0.47728	212.3	210.004	-3.20008
0.47732	208.4	209.905	-3.1981
0.47736	212.2	209.806	-3.19612
0.4774	206.8	209.707	-3.19413
0.47744	212.2	209.607	-3.19215
0.47748	206.4	209.508	-3.19016
0.47752	211.7	209.409	-3.18818
0.47756	205.8	209.31	-3.18619
0.4776	211	209.21	-3.1842
0.47764	205.9	209.111	-3.18222
0.47768	210.8	209.012	-3.18023
0.47772	205.9	208.912	-3.17824
0.47776	210.4	208.813	-3.17626
0.4778	206.2	208.713	-3.17427
0.47784	210.2	208.614	-3.17228
0.47788	207	208.515	-3.17029
0.47792	209.8	208.415	-3.1683
0.47796	207.2	208.316	-3.16631
0.478	210.4	208.216	-3.16432
0.47804	206.6	208.116	-3.16233
0.47808	210.2	208.017	-3.16034
0.47812	207.4	207.917	-3.15834
0.47816	209.7	207.817	-3.15635
0.4782	208	207.718	-3.15435
0.47824	208.4	207.618	-3.15236
0.47828	208.9	207.518	-3.15036
0.47832	207.1	207.418	-3.14836
0.47836	209.4	207.318	-3.14636
0.4784	206.5	207.218	-3.14436
0.47844	209.8	207.118	-3.14236
0.47848	204.4	207.018	-3.14036
0.47852	209.8	206.918	-3.13836
0.47856	203.6	206.818	-3.13635
0.4786	209.3	206.717	-3.13435
0.47864	203.2	206.617	-3.13234
0.47868	208.5	206.517	-3.13034
0.47872	203.3	206.416	-3.12833
0.47876	207.9	206.316	-3.12632
0.4788	203.4	206.216	-3.12431
0.47884	208	206.115	-3.1223
0.47888	203.8	206.015	-3.12029
0.47892	207.3	205.914	-3.11828
0.47896	203.3	205.813	-3.11627
0.479	207.3	205.713	-3.11425
0.47904	204.1	205.612	-3.11224
0.47908	207.2	205.511	-3.11022
0.47912	204.4	205.41	-3.10821
0.47916	207.2	205.31	-3.10619
0.4792	204.5	205.209	-3.10417
0.47924	207.2	205.108	-3.10215
0.47928	205.4	205.007	-3.10013
0.47932	206.3	204.906	-3.09811
0.47936	205.9	204.805	-3.09609
0.4794	205.2	204.703	-3.09407
0.47944	206.1	204.602	-3.09204
0.47948	203.9	204.501	-3.09002
0.47952	206.8	204.4	-3.08799
0.47956	202.1	204.298	-3.08596
0.4796	206.9	204.197	-3.08394
0.47964	200.8	204.095	-3.08191
0.47968	206.6	203.994	-3.07988
0.47972	200.4	203.892	-3.07785
0.47976	206.3	203.791	-3.07582
0.4798	200.4	203.689	-3.07379
0.47984	205.5	203.588	-3.07175
0.47988	200.4	203.486	-3.06972
0.47992	205	203.384	-3.06769
0.47996	200.5	203.283	-3.06565
0.48	204.5	203.181	-3.06362
0.48004	200.9	203.079	-3.06158
0.48008	204.3	202.977	-3.05955
0.48012	200.9	202.876	-3.05751
0.48016	204.2	202.774	-3.05548
0.4802	201.1	202.672	-3.05344
0.48024	204.9	202.57	-3.0514
0.48028	198.9	202.468	-3.04936
0.48032	204.6	202.366	-3.04733
0.48036	201.7	202.264	-3.04529
0.4804	204	202.162	-3.04325
0.48044	202.2	202.06	-3.04121
0.48048	202.6	201.958	-3.03916
0.48052	203.1	201.856	-3.03712
0.48056	201.4	201.754	-3.03508
0.4806	203.9	201.652	-3.03304
0.48064	199.9	201.55	-3.03099
0.48068	204.3	201.448	-3.02895
0.48072	198.7	201.345	-3.02691
0.48076	203.9	201.243	-3.02486
0.4808	197.9	201.141	-3.02282
0.48084	203.7	201.038	-3.02077
0.48088	197.4	200.936	-3.01872
0.48092	202.7	200.834	-3.01668
0.48096	197.6	200.732	-3.01463
0.481	202.2	200.629	-3.01258
0.48104	197.4	200.527	-3.01054
0.48108	201.7	200.424	-3.00849
0.48112	197.6	200.322	-3.00644
0.48116	201.6	200.22	-3.00439
0.4812	197.9	200.117	-3.00234
0.48124	201.4	200.015	-3.00029
0.48128	197.8	199.912	-2.99825
0.48132	201.6	199.81	-2.9962
0.48136	198.1	199.707	-2.99415
0.4814	201.3	199.605	-2.99209
0.48144	198.5	199.502	-2.99004
0.48148	201.1	199.4	-2.98799
0.48152	199	199.297	-2.98594
0.48156	200.4	199.194	-2.98389
0.4816	199.6	199.092	-2.98183
0.48164	199.5	198.989	-2.97978
0.48168	200.3	198.886	-2.97773
0.48172	197.8	198.784	-2.97567
0.48176	201.1	198.681	-2.97361
0.4818	196.4	198.578	-2.97156
0.48184	201.4	198.475	-2.9695
0.48188	195.7	198.372	-2.96744
0.48192	200.8	198.269	-2.96539
0.48196	194.9	198.166	-2.96333
0.482	200.2	198.063	-2.96127
0.48204	194.9	197.961	-2.95921
0.48208	199.2	197.858	-2.95715
0.48212	194.5	197.754	-2.95509
0.48216	199.3	197.651	-2.95303
0.4822	194.7	197.548	-2.95097
0.48224	199	197.445	-2.94891
0.48228	194.8	197.342	-2.94684
0.48232	198.8	197.239	-2.94478
0.48236	194.9	197.136	-2.94272
0.4824	199	197.033	-2.94065
0.48244	195.4	196.929	-2.93859
0.48248	198.7	196.826	-2.93652
0.48252	195.8	196.723	-2.93445
0.48256	198.8	196.619	-2.93239
0.4826	195.9	196.516	-2.93032
0.48264	197.8	196.413	-2.92825
0.48268	196.7	196.309	-2.92618
0.48272	196.8	196.205	-2.92411
0.48276	197.6	196.102	-2.92204
0.4828	195.7	195.998	-2.91997
0.48284	197.9	195.895	-2.91789
0.48288	194.3	195.791	-2.91582
0.48292	198.2	195.687	-2.91374
0.48296	193.2	195.583	-2.91167
0.483	198.2	195.48	-2.90959
0.48304	192.3	195.376	-2.90751
0.48308	197.5	195.272	-2.90543
0.48312	191.6	195.168	-2.90336
0.48316	197	195.064	-2.90128
0.4832	191.4	194.96	-2.89919
0.48324	196.4	194.856	-2.89711
0.48328	191.9	194.752	-2.89503
0.48332	196	194.647	-2.89295
0.48336	192.3	194.543	-2.89086
0.4834	195.6	194.439	-2.88878
0.48344	192.4	194.335	-2.88669
0.48348	196	194.23	-2.88461
0.48352	192	194.126	-2.88252
0.48356	196	194.022	-2.88043
0.4836	192.6	193.917	-2.87834
0.48364	196.1	193.813	-2.87625
0.48368	192.7	193.708	-2.87416
0.48372	195.3	193.604	-2.87207
0.48376	193.5	193.499	-2.86998
0.4838	194.4	193.394	-2.86788
0.48384	194.8	193.289	-2.86579
0.48388	193.1	193.185	-2.86369
0.48392	194.8	193.08	-2.86159
0.48396	192.1	192.975	-2.85949
0.484	195.5	192.87	-2.85739
0.48404	190.7	192.765	-2.85529
0.48408	195.5	192.66	-2.85319
0.48412	189.6	192.554	-2.85109
0.48416	195.1	192.449	-2.84898
0.4842	189.2	192.344	-2.84688
0.48424	194.3	192.239	-2.84477
0.48428	188.4	192.133	-2.84267
0.48432	193.8	192.028	-2.84056
0.48436	188.8	191.922	-2.83845
0.4844	193.7	191.817	-2.83634
0.48444	188.7	191.711	-2.83423
0.48448	193	191.606	-2.83212
0.48452	189.3	191.5	-2.83
0.48456	192.6	191.395	-2.82789
0.4846	189.3	191.289	-2.82578
0.48464	193	191.183	-2.82366
0.48468	189.7	191.077	-2.82154
0.48472	192.9	190.971	-2.81943
0.48476	189.8	190.865	-2.81731
0.4848	192.9	190.759	-2.81519
0.48484	190.6	190.653	-2.81307
0.48488	191.8	190.547	-2.81094
0.48492	190.9	190.441	-2.80882
0.48496	190.8	190.335	-2.8067
0.485	191.9	190.229	-2.80457
0.48504	189.4	190.122	-2.80244
0.48508	192.6	190.016	-2.80032
0.48512	187.8	189.909	-2.79819
0.48516	192.4	189.803	-2.79606
0.4852	186.9	189.696	-2.79393
0.48524	192.1	189.59	-2.79179
0.48528	186.6	189.483	-2.78966
0.48532	191.5	189.376	-2.78753
0.48536	185.7	189.27	-2.78539
0.4854	190.8	189.163	-2.78326
0.48544	186	189.056	-2.78112
0.48548	190.6	188.949	-2.77898
0.48552	185.9	188.842	-2.77684
0.48556	190.4	188.735	-2.7747
0.4856	186.5	188.628	-2.77256
0.48564	190	188.521	-2.77042
0.48568	186.5	188.414	-2.76828
0.48572	190.1	188.307	-2.76614
0.48576	186.6	188.2	-2.76399
0.4858	189.9	188.092	-2.76185
0.48584	186.9	187.985	-2.7597
0.48588	189.6	187.878	-2.75755
0.48592	187.3	187.77	-2.75541
0.48596	188.9	187.663	-2.75326
0.486	187.9	187.555	-2.75111
0.48604	188.2	187.448	-2.74895
0.48608	188.7	187.34	-2.7468
0.48612	186.9	187.232	-2.74465
0.48616	189.6	187.125	-2.74249
0.4862	185.4	187.017	-2.74034
0.48624	189.3	186.909	-2.73818
0.48628	184	186.801	-2.73602
0.48632	189.5	186.693	-2.73387
0.48636	183.4	186.585	-2.73171
0.4864	188.9	186.477	-2.72955
0.48644	182.7	186.369	-2.72739
0.48648	188.1	186.261	-2.72522
0.48652	182.7	186.153	-2.72306
0.48656	187.2	186.045	-2.7209
0.4866	183.4	185.937	-2.71873
0.48664	187.2	185.828	-2.71657
0.48668	183.1	185.72	-2.7144
0.48672	186.7	185.612	-2.71224
0.48676	183.5	185.503	-2.71007
0.4868	187	185.395	-2.7079
0.48684	184	185.287	-2.70573
0.48688	187.2	185.178	-2.70356
0.48692	184.1	185.07	-2.70139
0.48696	187	184.961	-2.69922
0.487	184	184.852	-2.69705
0.48704	186.1	184.744	-2.69487
0.48708	184.7	184.635	-2.6927
0.48712	185.4	184.526	-2.69052
0.48716	185.5	184.417	-2.68835
0.4872	184.5	184.309	-2.68617
0.48724	186.4	184.2	-2.68399
0.48728	182.6	184.091	-2.68181
0.48732	186.6	183.982	-2.67963
0.48736	181.8	183.873	-2.67745
0.4874	186.9	183.763	-2.67527
0.48744	180.4	183.654	-2.67309
0.48748	185.7	183.545	-2.6709
0.48752	180.2	183.436	-2.66872
0.48756	185.1	183.327	-2.66653
0.4876	180	183.217	-2.66435
0.48764	184.6	183.108	-2.66216
0.48768	179.9	182.999	-2.65997
0.48772	184.5	182.889	-2.65779
0.48776	179.9	182.78	-2.6556
0.4878	184.3	182.67	-2.65341
0.48784	180	182.561	-2.65122
0.48788	184	182.451	-2.64903
0.48792	180.8	182.342	-2.64684
0.48796	183.8	182.232	-2.64464
0.488	180.9	182.123	-2.64245
0.48804	184.3	182.013	-2.64026
0.48808	180.9	181.903	-2.63806
0.48812	183.5	181.793	-2.63587
0.48816	181.6	181.684	-2.63367
0.4882	182.8	181.574	-2.63148
0.48824	182.1	181.464	-2.62928
0.48828	182.3	181.354	-2.62708
0.48832	182.6	181.244	-2.62488
0.48836	180.5	181.134	-2.62268
0.4884	183.4	181.024	-2.62048
0.48844	178.6	180.914	-2.61828
0.48848	183.6	180.804	-2.61607
0.48852	177.7	180.694	-2.61387
0.48856	183.3	180.583	-2.61167
0.4886	177	180.473	-2.60946
0.48864	182.2	180.363	-2.60726
0.48868	177	180.253	-2.60505
0.48872	181.7	180.142	-2.60285
0.48876	176.9	180.032	-2.60064
0.4888	181.2	179.922	-2.59843
0.48884	176.9	179.811	-2.59623
0.48888	180.8	179.701	-2.59402
0.48892	177.2	179.591	-2.59181
0.48896	181.1	179.48	-2.5896
0.489	177	179.37	-2.58739
0.48904	181.1	179.259	-2.58518
0.48908	177.7	179.149	-2.58297
0.48912	181	179.038	-2.58076
0.48916	178.3	178.928	-2.57855
0.4892	180.4	178.817	-2.57634
0.48924	178.2	178.706	-2.57413
0.48928	180	178.596	-2.57191
0.48932	178.9	178.485	-2.5697
0.48936	178.6	178.374	-2.56748
0.4894	179.6	178.263	-2.56527
0.48944	177.3	178.153	-2.56305
0.48948	180.3	178.042	-2.56083
0.48952	175.8	177.931	-2.55862
0.48956	180.6	177.82	-2.5564
0.4896	175.3	177.709	-2.55418
0.48964	180.4	177.598	-2.55196
0.48968	174.4	177.487	-2.54974
0.48972	179.6	177.376	-2.54752
0.48976	173.5	177.265	-2.5453
0.4898	179.2	177.154	-2.54308
0.48984	173.6	177.043	-2.54085
0.48988	178.7	176.932	-2.53863
0.48992	173.9	176.82	-2.53641
0.48996	177.8	176.709	-2.53418
0.49	174.3	176.598	-2.53196
0.49004	177.6	176.487	-2.52973
0.49008	174.1	176.375	-2.52751
0.49012	178	176.264	-2.52528
0.49016	174.3	176.153	-2.52305
0.4902	178	176.041	-2.52083
0.49024	174.5	175.93	-2.5186
0.49028	178.1	175.818	-2.51637
0.49032	175	175.707	-2.51414
0.49036	177.7	175.595	-2.51191
0.4904	175.3	175.484	-2.50968
0.49044	176.1	175.372	-2.50744
0.49048	176.5	175.26	-2.50521
0.49052	174.9	175.149	-2.50297
0.49056	177.4	175.037	-2.50074
0.4906	173.5	174.925	-2.4985
0.49064	177.6	174.813	-2.49626
0.49068	172.2	174.701	-2.49403
0.49072	177.5	174.589	-2.49179
0.49076	171.4	174.477	-2.48955
0.4908	176.6	174.365	-2.48731
0.49084	171	174.253	-2.48507
0.49088	176.1	174.141	-2.48282
0.49092	171.2	174.029	-2.48058
0.49096	175.8	173.917	-2.47834
0.491	171.1	173.805	-2.47609
0.49104	175	173.692	-2.47385
0.49108	171.2	173.58	-2.4716
0.49112	174.9	173.468	-2.46935
0.49116	170.8	173.355	-2.46711
0.4912	175.3	173.243	-2.46486
0.49124	171	173.13	-2.46261
0.49128	175.1	173.018	-2.46036
0.49132	171.4	172.905	-2.45811
0.49136	175	172.793	-2.45585
0.4914	171.9	172.68	-2.4536
0.49144	174.9	172.567	-2.45135
0.49148	172.4	172.455	-2.44909
0.49152	173.5	172.342	-2.44684
0.49156	173	172.229	-2.44458
0.4916	172.4	172.116	-2.44232
0.49164	173.7	172.003	-2.44006
0.49168	171.3	171.89	-2.4378
0.49172	174.1	171.777	-2.43554
0.49176	169.7	171.664	-2.43328
0.4918	174.2	171.551	-2.43102
0.49184	168.8	171.438	-2.42876
0.49188	173.9	171.325	-2.4265
0.49192	167.9	171.212	-2.42423
0.49196	173	171.098	-2.42197
0.492	168.1	170.985	-2.4197
0.49204	172.4	170.872	-2.41744
0.49208	167.8	170.759	-2.41517
0.49212	172.4	170.645	-2.4129
0.49216	167.7	170.532	-2.41064
0.4922	172	170.418	-2.40837
0.49224	167.9	170.305	-2.4061
0.49228	171.9	170.192	-2.40383
0.49232	167.9	170.078	-2.40156
0.49236	172	169.965	-2.39929
0.4924	168.2	169.851	-2.39702
0.49244	171.8	169.738	-2.39475
0.49248	168.4	169.624	-2.39248
0.49252	171.4	169.51	-2.39021
0.49256	168.9	169.397	-2.38794
0.4926	171	169.283	-2.38566
0.49264	169.5	169.17	-2.38339
0.49268	169.9	169.056	-2.38112
0.49272	170.2	168.942	-2.37884
0.49276	169	168.828	-2.37657
0.4928	170.6	168.715	-2.3743
0.49284	166.8	168.601	-2.37202
0.49288	171.1	168.487	-2.36974
0.49292	166	168.373	-2.36747
0.49296	170.7	168.26	-2.36519
0.493	164.9	168.146	-2.36292
0.49304	170	168.032	-2.36064
0.49308	164.7	167.918	-2.35837
0.49312	169.8	167.805	-2.35609
0.49316	164.4	167.691	-2.35382
0.4932	168.8	167.577	-2.35154
0.49324	164.5	167.463	-2.34926
0.49328	168.6	167.349	-2.34699
0.49332	164.3	167.236	-2.34471
0.49336	168.7	167.122	-2.34244
0.4934	164.5	167.008	-2.34016
0.49344	168.4	166.894	-2.33789
0.49348	164.8	166.781	-2.33562
0.49352	168.8	166.667	-2.33334
0.49356	165.3	166.553	-2.33107
0.4936	168.5	166.44	-2.32879
0.49364	165.3	166.326	-2.32652
0.49368	168.2	166.212	-2.32424
0.49372	165.8	166.099	-2.32197
0.49376	167.1	165.985	-2.3197
0.4938	166.4	165.871	-2.31742
0.49384	165.6	165.758	-2.31515
0.49388	167.6	165.644	-2.31288
0.49392	164.2	165.53	-2.3106
0.49396	168	165.417	-2.30833
0.494	162.9	165.303	-2.30606
0.49404	168.1	165.189	-2.30379
0.49408	162.3	165.076	-2.30151
0.49412	167.1	164.962	-2.29924
0.49416	161.7	164.849	-2.29697
0.4942	166.6	164.735	-2.2947
0.49424	161.7	164.621	-2.29243
0.49428	166	164.508	-2.29016
0.49432	161.5	164.395	-2.28789
0.49436	165.9	164.281	-2.28562
0.4944	161.2	164.168	-2.28335
0.49444	165.4	164.054	-2.28108
0.49448	161.4	163.941	-2.27882
0.49452	165.5	163.827	-2.27655
0.49456	161.2	163.714	-2.27428
0.4946	165.6	163.601	-2.27202
0.49464	161.8	163.488	-2.26975
0.49468	165.5	163.374	-2.26749
0.49472	161.8	163.261	-2.26522
0.49476	165.1	163.148	-2.26296
0.4948	163	163.035	-2.26069
0.49484	164.4	162.921	-2.25843
0.49488	163.3	162.808	-2.25616
0.49492	163.3	162.695	-2.2539
0.49496	164	162.582	-2.25164
0.495	161.8	162.469	-2.24937
0.49504	164.6	162.356	-2.24711
0.49508	160.7	162.243	-2.24485
0.49512	164.6	162.129	-2.24259
0.49516	159.4	162.016	-2.24033
0.4952	164.4	161.903	-2.23807
0.49524	158.7	161.79	-2.23581
0.49528	164	161.677	-2.23355
0.49532	158	161.565	-2.23129
0.49536	163.5	161.452	-2.22903
0.4954	158	161.339	-2.22678
0.49544	163	161.226	-2.22452
0.49548	158.1	161.113	-2.22226
0.49552	162.4	161	-2.22001
0.49556	158.4	160.888	-2.21775
0.4956	162	160.775	-2.2155
0.49564	158.4	160.662	-2.21325
0.49568	162.2	160.55	-2.21099
0.49572	158.5	160.437	-2.20874
0.49576	162.3	160.324	-2.20649
0.4958	158.9	160.212	-2.20424
0.49584	162	160.099	-2.20199
0.49588	159.3	159.987	-2.19974
0.49592	161.4	159.874	-2.19749
0.49596	160	159.762	-2.19524
0.496	160.9	159.65	-2.19299
0.49604	160.6	159.537	-2.19074
0.49608	159.4	159.425	-2.1885
0.49612	161	159.313	-2.18625
0.49616	157.9	159.2	-2.18401
0.4962	161.4	159.088	-2.18176
0.49624	156.8	158.976	-2.17951
0.49628	161.7	158.864	-2.17727
0.49632	155.6	158.751	-2.17503
0.49636	161	158.639	-2.17278
0.4964	155.1	158.527	-2.17054
0.49644	160.5	158.415	-2.1683
0.49648	155	158.303	-2.16606
0.49652	159.5	158.191	-2.16382
0.49656	155.1	158.079	-2.16158
0.4966	159	157.967	-2.15934
0.49664	154.9	157.855	-2.1571
0.49668	158.9	157.743	-2.15487
0.49672	155.7	157.632	-2.15263
0.49676	159	157.52	-2.1504
0.4968	155.2	157.408	-2.14816
0.49684	159.2	157.296	-2.14593
0.49688	155.5	157.185	-2.14369
0.49692	159.5	157.073	-2.14146
0.49696	155.6	156.961	-2.13923
0.497	158.9	156.85	-2.137
0.49704	156.4	156.738	-2.13476
0.49708	157.4	156.627	-2.13253
0.49712	157.2	156.515	-2.1303
0.49716	156.3	156.404	-2.12807
0.4972	157.9	156.292	-2.12584
0.49724	154.9	156.181	-2.12362
0.49728	158.8	156.069	-2.12139
0.49732	154	155.958	-2.11916
0.49736	159	155.847	-2.11693
0.4974	152.9	155.735	-2.1147
0.49744	158.1	155.624	-2.11248
0.49748	152.3	155.513	-2.11025
0.49752	157.2	155.401	-2.10803
0.49756	152.2	155.29	-2.1058
0.4976	156.8	155.179	-2.10358
0.49764	151.9	155.068	-2.10135
0.49768	156.5	154.956	-2.09913
0.49772	152	154.845	-2.0969
0.49776	156.3	154.734	-2.09468
0.4978	152.5	154.623	-2.09246
0.49784	156.1	154.512	-2.09024
0.49788	152.4	154.401	-2.08802
0.49792	156	154.29	-2.0858
0.49796	152.2	154.179	-2.08357
0.498	155.9	154.068	-2.08135
0.49804	153	153.957	-2.07913
0.49808	155.7	153.846	-2.07691
0.49812	153.4	153.735	-2.07469
0.49816	154.9	153.624	-2.07247
0.4982	153.9	153.513	-2.07025
0.49824	154.6	153.402	-2.06803
0.49828	154.6	153.291	-2.06581
0.49832	152.5	153.18	-2.0636
0.49836	155.3	153.069	-2.06138
0.4984	151.2	152.958	-2.05916
0.49844	155.8	152.847	-2.05694
0.49848	149.9	152.736	-2.05472
0.49852	155.2	152.625	-2.0525
0.49856	149.6	152.514	-2.05028
0.4986	154.1	152.403	-2.04806
0.49864	149.3	152.292	-2.04584
0.49868	153.9	152.181	-2.04363
0.49872	149	152.07	-2.04141
0.49876	153.5	151.959	-2.03919
0.4988	149	151.849	-2.03697
0.49884	153.1	151.738	-2.03475
0.49888	149.1	151.627	-2.03254
0.49892	152.9	151.516	-2.03032
0.49896	149.2	151.405	-2.0281
0.499	152.9	151.294	-2.02588
0.49904	149.6	151.183	-2.02367
0.49908	152.9	151.073	-2.02145
0.49912	150	150.962	-2.01923
0.49916	152.8	150.851	-2.01702
0.4992	150	150.74	-2.0148
0.49924	152.4	150.629	-2.01258
0.49928	150.8	150.518	-2.01036
0.49932	151.2	150.407	-2.00814
0.49936	151.5	150.296	-2.00593
0.4994	149.7	150.185	-2.00371
0.49944	152.2	150.074	-2.00149
0.49948	149.2	149.963	-1.99927
0.49952	152.3	149.853	-1.99705
0.49956	147.7	149.742	-1.99483
0.4996	152.3	149.631	-1.99261
0.49964	146.7	149.52	-1.99039
0.49968	151.9	149.409	-1.98817
0.49972	145.8	149.298	-1.98595
0.49976	151.1	149.187	-1.98373
0.4998	145.9	149.076	-1.98151
0.49984	150.4	148.965	-1.97929
0.49988	146.1	148.854	-1.97707
0.49992	149.9	148.743	-1.97485
0.49996	146.3	148.632	-1.97263
0.5	149.8	148.52	-1.97041
0.50004	146.3	148.409	-1.96819
0.50008	149.9	148.298	-1.96597
0.50012	146.6	148.187	-1.96375
0.50016	150.3	148.076	-1.96153
0.5002	146.1	147.965	-1.95931
0.50024	150	147.854	-1.95708
0.50028	146.9	147.743	-1.95486
0.50032	149.3	147.632	-1.95264
0.50036	147.3	147.521	-1.95042
0.5004	148.9	147.41	-1.9482
0.50044	148.1	147.299	-1.94597
0.50048	147	147.188	-1.94375
0.50052	149	147.076	-1.94153
0.50056	145.8	146.965	-1.9393
0.5006	149.9	146.854	-1.93708
0.50064	144.5	146.743	-1.93486
0.50068	149.2	146.632	-1.93263
0.50072	143.8	146.52	-1.93041
0.50076	148.6	146.409	-1.92818
0.5008	143.2	146.298	-1.92596
0.50084	148	146.187	-1.92373
0.50088	142.9	146.075	-1.92151
0.50092	147.4	145.964	-1.91929
0.50096	143	145.853	-1.91706
0.501	147.2	145.742	-1.91484
0.50104	142.6	145.631	-1.91261
0.50108	146.8	145.519	-1.91039
0.50112	143.1	145.408	-1.90816
0.50116	146.8	145.297	-1.90594
0.5012	143.7	145.186	-1.90371
0.50124	146.9	145.074	-1.90149
0.50128	143.6	144.963	-1.89926
0.50132	146.8	144.852	-1.89704
0.50136	143.7	144.741	-1.89481
0.5014	146.4	144.629	-1.89258
0.50144	143.8	144.518	-1.89036
0.50148	145.9	144.407	-1.88813
0.50152	144.8	144.295	-1.88591
0.50156	145	144.184	-1.88368
0.5016	145.6	144.073	-1.88145
0.50164	143.6	143.961	-1.87923
0.50168	146.2	143.85	-1.877
0.50172	142.1	143.739	-1.87477
0.50176	146	143.627	-1.87254
0.5018	140.9	143.516	-1.87032
0.50184	145.7	143.404	-1.86809
0.50188	140.2	143.293	-1.86586
0.50192	145.4	143.182	-1.86363
0.50196	139.8	143.07	-1.8614
0.502	144.8	142.959	-1.85918
0.50204	139.6	142.847	-1.85695
0.50208	144.3	142.736	-1.85472
0.50212	139.8	142.625	-1.85249
0.50216	143.7	142.513	-1.85027
0.5022	140.1	142.402	-1.84804
0.50224	143.8	142.291	-1.84581
0.50228	140.2	142.179	-1.84358
0.50232	143.4	142.068	-1.84136
0.50236	140	141.957	-1.83913
0.5024	143.7	141.845	-1.8369
0.50244	140.2	141.734	-1.83468
0.50248	143.5	141.622	-1.83245
0.50252	140.6	141.511	-1.83022
0.50256	143.3	141.4	-1.82799
0.5026	141.1	141.288	-1.82577
0.50264	142.3	141.177	-1.82354
0.50268	142.4	141.066	-1.82131
0.50272	140.6	140.954	-1.81908
0.50276	142.5	140.843	-1.81686
0.5028	139.1	140.731	-1.81463
0.50284	143.3	140.62	-1.8124
0.50288	138	140.509	-1.81017
0.50292	142.7	140.397	-1.80795
0.50296	137.3	140.286	-1.80572
0.503	142.6	140.174	-1.80349
0.50304	136.7	140.063	-1.80126
0.50308	141.9	139.952	-1.79903
0.50312	136.8	139.84	-1.79681
0.50316	141.5	139.729	-1.79458
0.5032	136.6	139.617	-1.79235
0.50324	140.8	139.506	-1.79012
0.50328	136.6	139.395	-1.78789
0.50332	140.5	139.283	-1.78567
0.50336	136.3	139.172	-1.78344
0.5034	140.4	139.061	-1.78121
0.50344	136.8	138.949	-1.77898
0.50348	140.4	138.838	-1.77676
0.50352	137.1	138.726	-1.77453
0.50356	140.6	138.615	-1.7723
0.5036	137.6	138.504	-1.77007
0.50364	140.4	138.392	-1.76784
0.50368	137.7	138.281	-1.76561
0.50372	139.6	138.169	-1.76338
0.50376	138.6	138.058	-1.76115
0.5038	138.3	137.946	-1.75892
0.50384	139.3	137.835	-1.75669
0.50388	137.1	137.723	-1.75446
0.50392	139.8	137.611	-1.75223
0.50396	135.9	137.5	-1.75
0.504	140	137.388	-1.74776
0.50404	134.7	137.277	-1.74553
0.50408	140	137.165	-1.7433
0.50412	133.9	137.053	-1.74106
0.50416	139.2	136.941	-1.73883
0.5042	133.5	136.83	-1.73659
0.50424	138.5	136.718	-1.73436
0.50428	133.8	136.606	-1.73212
0.50432	137.8	136.494	-1.72989
0.50436	133.6	136.382	-1.72765
0.5044	137.3	136.271	-1.72541
0.50444	133.8	136.159	-1.72317
0.50448	137.5	136.047	-1.72094
0.50452	133.9	135.935	-1.7187
0.50456	137.7	135.823	-1.71646
0.5046	134.1	135.711	-1.71422
0.50464	137.6	135.599	-1.71198
0.50468	134.3	135.487	-1.70974
0.50472	137.6	135.375	-1.70749
0.50476	134.5	135.263	-1.70525
0.5048	136.9	135.15	-1.70301
0.50484	135.1	135.038	-1.70076
0.50488	135.9	134.926	-1.69852
0.50492	135.8	134.813	-1.69627
0.50496	134.6	134.701	-1.69402
0.505	136.6	134.589	-1.69177
0.50504	133.6	134.476	-1.68952
0.50508	136.9	134.364	-1.68727
0.50512	131.8	134.251	-1.68502
0.50516	136.9	134.139	-1.68277
0.5052	131.3	134.026	-1.68052
0.50524	136.5	133.913	-1.67826
0.50528	130.7	133.8	-1.67601
0.50532	135.8	133.688	-1.67375
0.50536	130.4	133.575	-1.6715
0.5054	135	133.462	-1.66924
0.50544	130.3	133.349	-1.66698
0.50548	134.9	133.236	-1.66473
0.50552	130.5	133.123	-1.66247
0.50556	134.2	133.01	-1.66021
0.5056	130.5	132.897	-1.65795
0.50564	134.4	132.784	-1.65569
0.50568	130.8	132.671	-1.65342
0.50572	134.3	132.558	-1.65116
0.50576	130.9	132.445	-1.6489
0.5058	134.5	132.332	-1.64663
0.50584	131.3	132.218	-1.64437
0.50588	134.2	132.105	-1.6421
0.50592	131.8	131.992	-1.63983
0.50596	133.2	131.878	-1.63756
0.506	132.6	131.765	-1.63529
0.50604	132.1	131.651	-1.63302
0.50608	133.3	131.537	-1.63075
0.50612	130.5	131.424	-1.62848
0.50616	133.7	131.31	-1.6262
0.5062	129.4	131.196	-1.62393
0.50624	133.7	131.083	-1.62165
0.50628	128.5	130.969	-1.61938
0.50632	133.3	130.855	-1.6171
0.50636	127.8	130.741	-1.61482
0.5064	132.7	130.627	-1.61254
0.50644	127.4	130.513	-1.61026
0.50648	132.1	130.399	-1.60798
0.50652	127.3	130.285	-1.6057
0.50656	131.6	130.171	-1.60342
0.5066	127	130.057	-1.60114
0.50664	131.5	129.943	-1.59885
0.50668	127.4	129.829	-1.59657
0.50672	131.5	129.714	-1.59429
0.50676	127.3	129.6	-1.592
0.5068	131.2	129.486	-1.58972
0.50684	127.6	129.371	-1.58743
0.50688	131.6	129.257	-1.58514
0.50692	127.8	129.143	-1.58285
0.50696	131.2	129.028	-1.58057
0.507	128.4	128.914	-1.57828
0.50704	130.3	128.799	-1.57599
0.50708	128.8	128.685	-1.57369
0.50712	129.5	128.57	-1.5714
0.50716	130	128.456	-1.56911
0.5072	128	128.341	-1.56682
0.50724	130.5	128.226	-1.56452
0.50728	127	128.111	-1.56223
0.50732	130.5	127.997	-1.55993
0.50736	125.7	127.882	-1.55764
0.5074	130.3	127.767	-1.55534
0.50744	124.6	127.652	-1.55305
0.50748	129.7	127.537	-1.55075
0.50752	124.2	127.423	-1.54845
0.50756	129.2	127.308	-1.54615
0.5076	124.5	127.193	-1.54385
0.50764	128.4	127.078	-1.54156
0.50768	123.7	126.963	-1.53926
0.50772	128.4	126.848	-1.53696
0.50776	124.1	126.733	-1.53466
0.5078	128.1	126.618	-1.53236
0.50784	124.1	126.503	-1.53006
0.50788	128	126.388	-1.52776
0.50792	124.4	126.273	-1.52546
0.50796	128.1	126.158	-1.52316
0.508	124.3	126.043	-1.52086
0.50804	128.1	125.928	-1.51856
0.50808	124.9	125.813	-1.51626
0.50812	127.3	125.698	-1.51396
0.50816	125.6	125.583	-1.51166
0.5082	126.5	125.468	-1.50936
0.50824	126.3	125.353	-1.50705
0.50828	125.3	125.238	-1.50475
0.50832	126.5	125.123	-1.50245
0.50836	124.1	125.007	-1.50015
0.5084	127	124.892	-1.49785
0.50844	122.6	124.777	-1.49554
0.50848	127.7	124.662	-1.49324
0.50852	121.4	124.547	-1.49094
0.50856	126.9	124.432	-1.48864
0.5086	120.9	124.317	-1.48633
0.50864	126.2	124.202	-1.48403
0.50868	120.9	124.087	-1.48173
0.50872	125.2	123.971	-1.47943
0.50876	120.8	123.856	-1.47713
0.5088	124.9	123.741	-1.47483
0.50884	120.7	123.626	-1.47253
0.50888	124.7	123.511	-1.47023
0.50892	121.4	123.396	-1.46793
0.50896	124.5	123.281	-1.46562
0.509	121.2	123.166	-1.46332
0.50904	124.8	123.051	-1.46103
0.50908	121.5	122.936	-1.45873
0.50912	124.8	122.821	-1.45643
0.50916	121.7	122.706	-1.45413
0.5092	124.6	122.591	-1.45183
0.50924	121.9	122.476	-1.44953
0.50928	123.8	122.361	-1.44723
0.50932	122.7	122.246	-1.44493
0.50936	122.6	122.132	-1.44263
0.5094	123.5	122.017	-1.44033
0.50944	121.2	121.902	-1.43803
0.50948	123.9	121.787	-1.43573
0.50952	119.9	121.672	-1.43344
0.50956	124.1	121.557	-1.43114
0.5096	118.6	121.442	-1.42884
0.50964	123.6	121.327	-1.42654
0.50968	118.2	121.212	-1.42424
0.50972	123.1	121.097	-1.42195
0.50976	117.8	120.982	-1.41965
0.5098	122.7	120.868	-1.41735
0.50984	117.1	120.753	-1.41506
0.50988	121.8	120.638	-1.41276
0.50992	117.9	120.523	-1.41046
0.50996	121.4	120.408	-1.40817
0.51	117.6	120.294	-1.40587
0.51004	121.9	120.179	-1.40358
0.51008	117.6	120.064	-1.40128
0.51012	121.5	119.949	-1.39899
0.51016	118	119.835	-1.39669
0.5102	121.6	119.72	-1.3944
0.51024	117.8	119.605	-1.39211
0.51028	121.7	119.491	-1.38981
0.51032	118.4	119.376	-1.38752
0.51036	120.7	119.261	-1.38522
0.5104	119.4	119.146	-1.38293
0.51044	120	119.032	-1.38063
0.51048	120.1	118.917	-1.37834
0.51052	118.7	118.802	-1.37605
0.51056	120.7	118.688	-1.37375
0.5106	117.2	118.573	-1.37146
0.51064	121.1	118.458	-1.36916
0.51068	115.7	118.343	-1.36687
0.51072	120.7	118.229	-1.36457
0.51076	115.3	118.114	-1.36228
0.5108	120.3	117.999	-1.35998
0.51084	114.9	117.884	-1.35769
0.51088	119.4	117.77	-1.35539
0.51092	114.4	117.655	-1.3531
0.51096	118.7	117.54	-1.3508
0.511	114.7	117.425	-1.34851
0.51104	118.7	117.31	-1.34621
0.51108	114.6	117.196	-1.34391
0.51112	118.9	117.081	-1.34162
0.51116	114.7	116.966	-1.33932
0.5112	118.4	116.851	-1.33703
0.51124	115.2	116.736	-1.33473
0.51128	118.3	116.622	-1.33243
0.51132	115.3	116.507	-1.33013
0.51136	118.5	116.392	-1.32784
0.5114	115.4	116.277	-1.32554
0.51144	118.1	116.162	-1.32324
0.51148	116.1	116.047	-1.32094
0.51152	117	115.932	-1.31864
0.51156	116.9	115.817	-1.31634
0.5116	116	115.702	-1.31404
0.51164	117.5	115.587	-1.31174
0.51168	114.6	115.472	-1.30943
0.51172	118	115.357	-1.30713
0.51176	113.2	115.241	-1.30483
0.5118	117.7	115.126	-1.30252
0.51184	112.2	115.011	-1.30022
0.51188	117.5	114.896	-1.29792
0.51192	111.2	114.781	-1.29561
0.51196	116.9	114.665	-1.2933
0.512	111.2	114.55	-1.291
0.51204	116.2	114.435	-1.28869
0.51208	111.5	114.319	-1.28639
0.51212	115.5	114.204	-1.28408
0.51216	111.7	114.089	-1.28177
0.5122	115.3	113.973	-1.27946
0.51224	111.5	113.858	-1.27715
0.51228	115.2	113.742	-1.27484
0.51232	111.6	113.627	-1.27253
0.51236	115.7	113.511	-1.27022
0.5124	111.8	113.396	-1.26791
0.51244	115.3	113.28	-1.2656
0.51248	112.5	113.165	-1.26329
0.51252	114.9	113.049	-1.26098
0.51256	112.8	112.933	-1.25867
0.5126	114.2	112.818	-1.25635
0.51264	113.6	112.702	-1.25404
0.51268	112.8	112.586	-1.25172
0.51272	114.3	112.47	-1.24941
0.51276	111.6	112.355	-1.24709
0.5128	114.8	112.239	-1.24477
0.51284	110.3	112.123	-1.24246
0.51288	114.5	112.007	-1.24014
0.51292	109.4	111.891	-1.23782
0.51296	114.2	111.775	-1.2355
0.513	108.6	111.659	-1.23318
0.51304	113.4	111.543	-1.23086
0.51308	108.5	111.427	-1.22854
0.51312	112.9	111.311	-1.22622
0.51316	108	111.195	-1.2239
0.5132	112.9	111.079	-1.22158
0.51324	108	110.963	-1.21926
0.51328	112.1	110.847	-1.21694
0.51332	108.5	110.731	-1.21462
0.51336	112	110.615	-1.2123
0.5134	108.9	110.499	-1.20997
0.51344	111.9	110.383	-1.20765
0.51348	108.4	110.266	-1.20533
0.51352	112.2	110.15	-1.20301
0.51356	108.9	110.034	-1.20068
0.5136	111.8	109.918	-1.19836
0.51364	109.4	109.802	-1.19604
0.51368	111.1	109.686	-1.19371
0.51372	110.1	109.569	-1.19139
0.51376	110.3	109.453	-1.18906
0.5138	110.8	109.337	-1.18674
0.51384	108.4	109.221	-1.18441
0.51388	111.6	109.104	-1.18208
0.51392	107.2	108.988	-1.17976
0.51396	111.2	108.872	-1.17743
0.514	106.1	108.755	-1.17511
0.51404	111.2	108.639	-1.17278
0.51408	104.9	108.523	-1.17045
0.51412	110.4	108.406	-1.16812
0.51416	104.9	108.29	-1.1658
0.5142	109.7	108.174	-1.16347
0.51424	105.1	108.057	-1.16114
0.51428	109.1	107.941	-1.15882
0.51432	104.9	107.825	-1.15649
0.51436	108.9	107.708	-1.15416
0.5144	105	107.592	-1.15184
0.51444	108.9	107.476	-1.14951
0.51448	105.1	107.359	-1.14718
0.51452	108.9	107.243	-1.14486
0.51456	105.4	107.127	-1.14253
0.5146	109	107.01	-1.1402
0.51464	105.7	106.894	-1.13788
0.51468	108.8	106.778	-1.13555
0.51472	106.4	106.661	-1.13322
0.51476	107.8	106.545	-1.1309
0.5148	107.1	106.428	-1.12857
0.51484	106.9	106.312	-1.12624
0.51488	107.7	106.196	-1.12391
0.51492	105.1	106.079	-1.12159
0.51496	108.3	105.963	-1.11926
0.515	104	105.846	-1.11693
0.51504	108.3	105.73	-1.1146
0.51508	102.8	105.614	-1.11227
0.51512	108.3	105.497	-1.10994
0.51516	102.3	105.381	-1.10761
0.5152	107.5	105.264	-1.10529
0.51524	101.8	105.148	-1.10296
0.51528	106.8	105.031	-1.10063
0.51532	101.8	104.915	-1.0983
0.51536	106.1	104.798	-1.09597
0.5154	101.7	104.682	-1.09364
0.51544	105.7	104.566	-1.09131
0.51548	101.9	104.449	-1.08898
0.51552	105.6	104.333	-1.08665
0.51556	102.2	104.216	-1.08432
0.5156	105.8	104.1	-1.082
0.51564	102.2	103.983	-1.07967
0.51568	106	103.867	-1.07734
0.51572	102.5	103.75	-1.07501
0.51576	105.8	103.634	-1.07268
0.5158	102.7	103.517	-1.07035
0.51584	105	103.401	-1.06802
0.51588	103.8	103.284	-1.06568
0.51592	103.9	103.168	-1.06335
0.51596	104.3	103.051	-1.06102
0.516	102.6	102.934	-1.05869
0.51604	105.2	102.818	-1.05636
0.51608	101	102.701	-1.05402
0.51612	105.5	102.585	-1.05169
0.51616	99.83	102.468	-1.04936
0.5162	105	102.351	-1.04702
0.51624	99.11	102.235	-1.04469
0.51628	104.1	102.118	-1.04236
0.51632	99.07	102.001	-1.04002
0.51636	103.5	101.884	-1.03769
0.5164	98.73	101.768	-1.03535
0.51644	103.2	101.651	-1.03302
0.51648	98.73	101.534	-1.03068
0.51652	102.9	101.417	-1.02835
0.51656	98.64	101.301	-1.02601
0.5166	102.6	101.184	-1.02368
0.51664	98.59	101.067	-1.02134
0.51668	102.3	100.95	-1.019
0.51672	98.88	100.833	-1.01667
0.51676	102.9	100.717	-1.01433
0.5168	99.54	100.6	-1.01199
0.51684	102.5	100.483	-1.00966
0.51688	99.78	100.366	-1.00732
[truncated: 23,003 more rows]

## Sheet: Sheet2
0.5334	51.54	49.9771	0.000457082	0.00142947
0.53344	50.1	49.8494	0.00301177	0.00296097
0.53348	51.78	49.7217	0.00556617	0.00454184
0.53352	48.24	49.594	0.00812022	0.00617295
0.53356	52.16	49.4663	0.0106739	0.00785516
0.5336	47.38	49.3387	0.013227	0.00958932
0.53364	51.88	49.211	0.0157796	0.0113763
0.53368	46.37	49.0834	0.0183315	0.0132169
0.53372	51.4	48.9559	0.0208826	0.015112
0.53376	45.51	48.8284	0.023433	0.0170624
0.5338	50.77	48.7009	0.0259824	0.0190691
0.53384	45.46	48.5735	0.0285309	0.0211327
0.53388	50.15	48.4461	0.0310783	0.0232542
0.53392	45.65	48.3188	0.0336245	0.0254344
0.53396	49.53	48.1915	0.0361696	0.027674
0.534	45.46	48.0643	0.0387135	0.0299739
0.53404	49.39	47.9372	0.041256	0.0323348
0.53408	45.6	47.8101	0.0437972	0.0347575
0.53412	49.29	47.6831	0.046337	0.0372428
0.53416	45.56	47.5562	0.0488754	0.0397915
0.5342	49	47.4294	0.0514123	0.0424042
0.53424	45.84	47.3026	0.0539477	0.0450818
0.53428	49.1	47.1759	0.0564815	0.0478248
0.53432	46.23	47.0493	0.0590137	0.050634
0.53436	48.62	46.9228	0.0615444	0.0535101
0.5344	46.75	46.7963	0.0640733	0.0564537
0.53444	47.95	46.67	0.0666005	0.0594654
0.53448	47.38	46.5437	0.0691259	0.0625459
0.53452	46.56	46.4175	0.0716495	0.0656958
0.53456	48.05	46.2914	0.0741712	0.0689156
0.5346	45.22	46.1655	0.0766909	0.0722059
0.53464	48.19	46.0396	0.0792085	0.0755672
0.53468	43.83	45.9138	0.0817239	0.079
0.53472	48.76	45.7881	0.0842371	0.0825048
0.53476	42.78	45.6626	0.086748	0.086082
0.5348	48	45.5372	0.0892564	0.0897319
0.53484	42.16	45.4119	0.0917624	0.0934549
0.53488	47.47	45.2867	0.0942657	0.0972514
0.53492	41.63	45.1617	0.0967664	0.101122
0.53496	46.61	45.0368	0.0992643	0.105066
0.535	41.68	44.912	0.101759	0.109084
0.53504	45.94	44.7874	0.104251	0.113177
0.53508	41.82	44.663	0.106741	0.117344
0.53512	45.75	44.5387	0.109227	0.121586
0.53516	42.3	44.4145	0.11171	0.125903
0.5352	45.32	44.2905	0.11419	0.130295
0.53524	42.11	44.1666	0.116667	0.134761
0.53528	45.8	44.043	0.119141	0.139302
0.53532	42.25	43.9194	0.121611	0.143917
0.53536	45.65	43.7961	0.124079	0.148607
0.5354	42.35	43.6729	0.126543	0.153372
0.53544	45.7	43.5498	0.129004	0.15821
0.53548	42.97	43.4269	0.131461	0.163122
0.53552	44.7	43.3042	0.133916	0.168108
0.53556	43.83	43.1817	0.136366	0.173167
0.5356	43.5	43.0593	0.138814	0.178298
0.53564	44.31	42.9371	0.141258	0.183502
0.53568	41.78	42.8151	0.143698	0.188778
0.53572	44.89	42.6933	0.146135	0.194125
0.53576	40.91	42.5716	0.148568	0.199543
0.5358	44.98	42.4501	0.150997	0.205031
0.53584	39.43	42.3289	0.153423	0.210589
0.53588	44.5	42.2078	0.155845	0.216216
0.53592	38.62	42.0869	0.158262	0.221912
0.53596	43.59	41.9662	0.160676	0.227675
0.536	38.33	41.8457	0.163085	0.233505
0.53604	43.26	41.7255	0.165491	0.239401
0.53608	38.52	41.6054	0.167892	0.245363
0.53612	42.78	41.4855	0.170289	0.251388
0.53616	37.95	41.3659	0.172682	0.257476
0.5362	42.49	41.2465	0.17507	0.263626
0.53624	38.28	41.1273	0.177454	0.269837
0.53628	42.01	41.0083	0.179834	0.276107
0.53632	38.52	40.8895	0.182209	0.282435
0.53636	42.21	40.771	0.18458	0.28882
0.5364	38.62	40.6526	0.186947	0.295261
0.53644	42.25	40.5345	0.189309	0.301756
0.53648	39.24	40.4166	0.191668	0.308304
0.53652	42.54	40.2989	0.194021	0.314903
0.53656	39.57	40.1814	0.196371	0.321551
0.5366	41.54	40.0642	0.198716	0.328246
0.53664	40.05	39.9471	0.201057	0.334988
0.53668	40.53	39.8303	0.203394	0.341773
0.53672	40.82	39.7137	0.205726	0.348599
0.53676	38.71	39.5973	0.208055	0.355464
0.5368	41.68	39.4811	0.210378	0.362367
0.53684	37.61	39.3651	0.212698	0.369304
0.53688	41.63	39.2494	0.215013	0.376274
0.53692	36.56	39.1338	0.217323	0.383273
0.53696	41.78	39.0185	0.21963	0.390299
0.537	35.55	38.9034	0.221931	0.39735
0.53704	40.91	38.7886	0.224229	0.404423
0.53708	35.27	38.6739	0.226521	0.411515
0.53712	39.86	38.5595	0.22881	0.418623
0.53716	35.03	38.4453	0.231093	0.425744
0.5372	39.53	38.3314	0.233372	0.432874
0.53724	35.17	38.2177	0.235647	0.440012
0.53728	39.05	38.1042	0.237917	0.447152
0.53732	35.41	37.9909	0.240182	0.454292
0.53736	38.86	37.8778	0.242443	0.461428
0.5374	36.03	37.765	0.2447	0.468557
0.53744	39.29	37.6524	0.246952	0.475674
0.53748	35.6	37.54	0.249199	0.482775
0.53752	39.19	37.4279	0.251443	0.489857
0.53756	35.98	37.3159	0.253682	0.496916
0.5376	39.29	37.2042	0.255916	0.503946
0.53764	36.75	37.0927	0.258147	0.510944
0.53768	38.42	36.9813	0.260373	0.517906
0.53772	37.23	36.8702	0.262595	0.524826
0.53776	37.71	36.7593	0.264813	0.5317
0.5378	37.95	36.6486	0.267027	0.538524
0.53784	36.41	36.5381	0.269237	0.545292
0.53788	38.62	36.4279	0.271443	0.551998
0.53792	35.07	36.3178	0.273644	0.558639
0.53796	38.66	36.2079	0.275842	0.565208
0.538	33.73	36.0982	0.278035	0.571699
0.53804	39	35.9888	0.280224	0.578107
0.53808	33.25	35.8795	0.282409	0.584426
0.53812	37.95	35.7705	0.28459	0.590652
0.53816	32.49	35.6617	0.286767	0.59678
0.5382	37.52	35.5531	0.288939	0.602807
0.53824	32.15	35.4447	0.291107	0.608731
0.53828	37.32	35.3365	0.293271	0.614551
0.53832	32.06	35.2285	0.29543	0.620267
0.53836	36.32	35.1207	0.297586	0.625881
0.5384	32.87	35.0132	0.299737	0.631397
0.53844	36.13	34.9058	0.301884	0.636816
0.53848	33.02	34.7987	0.304026	0.642145
0.53852	36.03	34.6918	0.306165	0.647387
0.53856	33.06	34.585	0.308299	0.652548
0.5386	36.46	34.4785	0.310429	0.657632
0.53864	33.06	34.3722	0.312555	0.662645
0.53868	36.46	34.2661	0.314677	0.667593
0.53872	33.4	34.1602	0.316795	0.67248
0.53876	36.13	34.0546	0.318909	0.677312
0.5388	33.69	33.9491	0.321019	0.682092
0.53884	35.03	33.8438	0.323124	0.686825
0.53888	35.12	33.7387	0.325226	0.691517
0.53892	33.78	33.6338	0.327323	0.69617
0.53896	35.6	33.5292	0.329417	0.700789
0.539	32.39	33.4247	0.331506	0.705379
0.53904	36.22	33.3204	0.333592	0.709942
0.53908	31.34	33.2164	0.335673	0.714483
0.53912	35.74	33.1125	0.337749	0.719004
0.53916	30.62	33.0089	0.339822	0.72351
0.5392	35.41	32.9055	0.34189	0.728003
0.53924	29.62	32.8023	0.343954	0.732486
0.53928	34.74	32.6993	0.346013	0.736962
0.53932	29.47	32.5966	0.348068	0.741433
0.53936	33.93	32.4941	0.350119	0.7459
0.5394	29.09	32.3918	0.352165	0.750366
0.53944	33.25	32.2897	0.354206	0.75483
0.53948	30.14	32.1878	0.356243	0.759294
0.53952	33.45	32.0862	0.358275	0.763758
0.53956	30.38	31.9849	0.360303	0.768223
0.5396	33.45	31.8837	0.362326	0.772689
0.53964	29.95	31.7828	0.364344	0.777155
0.53968	33.69	31.6821	0.366358	0.781622
0.53972	30.43	31.5817	0.368367	0.786089
0.53976	33.83	31.4814	0.370371	0.790556
0.5398	30.91	31.3814	0.372371	0.795022
0.53984	33.11	31.2817	0.374366	0.799487
0.53988	31.05	31.1822	0.376357	0.803949
0.53992	32.11	31.0829	0.378342	0.808408
0.53996	31.91	30.9838	0.380323	0.812862
0.54	30.96	30.885	0.382299	0.817311
0.54004	32.68	30.7865	0.38427	0.821753
0.54008	29.52	30.6882	0.386237	0.82619
0.54012	33.16	30.5901	0.388198	0.830622
0.54016	28.37	30.4923	0.390154	0.835049
0.5402	33.73	30.3947	0.392106	0.839473
0.54024	27.32	30.2974	0.394052	0.843895
0.54028	32.58	30.2004	0.395993	0.848319
0.54032	27.13	30.1036	0.397928	0.852746
0.54036	31.82	30.0071	0.399858	0.857179
0.5404	26.27	29.9109	0.401783	0.861619
0.54044	31.44	29.8149	0.403702	0.866069
0.54048	26.89	29.7192	0.405616	0.870531
0.54052	31.05	29.6238	0.407524	0.875005
0.54056	27.08	29.5287	0.409426	0.879493
0.5406	30.72	29.4339	0.411323	0.883996
0.54064	27.46	29.3393	0.413214	0.888513
0.54068	30.67	29.2451	0.415099	0.893045
0.54072	27.42	29.1511	0.416978	0.897592
0.54076	30.72	29.0574	0.418852	0.902154
0.5408	27.61	28.964	0.42072	0.906729
0.54084	30.48	28.8709	0.422581	0.911319
0.54088	27.89	28.7781	0.424437	0.915922
0.54092	30.57	28.6856	0.426288	0.920539
0.54096	28.47	28.5934	0.428132	0.925172
0.541	29.66	28.5015	0.42997	0.92982
0.54104	29.14	28.4099	0.431802	0.934486
0.54108	28.9	28.3186	0.433628	0.939171
0.54112	30	28.2276	0.435448	0.943879
0.54116	27.27	28.1369	0.437262	0.948611
0.5412	30.29	28.0465	0.43907	0.95337
0.54124	26.31	27.9564	0.440871	0.95816
0.54128	30.34	27.8667	0.442666	0.962982
0.54132	25.02	27.7773	0.444454	0.967838
0.54136	29.95	27.6882	0.446236	0.97273
0.5414	24.26	27.5994	0.448011	0.97766
0.54144	29.71	27.511	0.44978	0.982629
0.54148	24.11	27.4229	0.451542	0.987635
0.54152	28.8	27.3352	0.453297	0.992681
0.54156	23.87	27.2478	0.455044	0.997764
0.5416	28.37	27.1607	0.456785	1.00288
0.54164	24.26	27.074	0.458519	1.00804
0.54168	28.32	26.9877	0.460246	1.01323
0.54172	24.26	26.9017	0.461966	1.01846
0.54176	28.13	26.8161	0.463679	1.02372
0.5418	24.73	26.7308	0.465384	1.02901
0.54184	28.04	26.6459	0.467083	1.03434
0.54188	24.97	26.5613	0.468774	1.03969
0.54192	28.18	26.4771	0.470458	1.04507
0.54196	25.5	26.3932	0.472135	1.05049
0.542	28.28	26.3098	0.473805	1.05593
0.54204	25.74	26.2266	0.475467	1.0614
0.54208	27.56	26.1439	0.477123	1.06691
0.54212	26.55	26.0615	0.478771	1.07245
0.54216	26.98	25.9794	0.480411	1.07803
0.5422	27.37	25.8978	0.482045	1.08364
0.54224	25.21	25.8165	0.48367	1.0893
0.54228	27.7	25.7356	0.485289	1.095
0.54232	23.78	25.655	0.4869	1.10074
0.54236	28.37	25.5748	0.488503	1.10653
0.5424	22.63	25.4951	0.490099	1.11237
0.54244	27.89	25.4157	0.491687	1.11826
0.54248	22.29	25.3366	0.493267	1.1242
0.54252	27.18	25.258	0.49484	1.1302
0.54256	21.86	25.1798	0.496404	1.13625
0.5426	26.6	25.102	0.497961	1.14235
0.54264	21.96	25.0245	0.499509	1.14851
0.54268	26.22	24.9475	0.50105	1.15473
0.54272	22.01	24.8709	0.502583	1.161
0.54276	25.74	24.7947	0.504107	1.16733
0.5428	21.91	24.7188	0.505623	1.17371
0.54284	25.79	24.6434	0.507131	1.18016
0.54288	22.44	24.5684	0.508631	1.18666
0.54292	25.93	24.4938	0.510123	1.19322
0.54296	22.72	24.4196	0.511607	1.19984
0.543	26.36	24.3459	0.513083	1.20652
0.54304	22.96	24.2725	0.51455	1.21325
0.54308	26.17	24.1995	0.51601	1.22005
0.54312	23.73	24.127	0.517461	1.22691
0.54316	25.79	24.0548	0.518904	1.23384
0.5432	24.26	23.9831	0.520339	1.24082
0.54324	24.83	23.9117	0.521766	1.24786
0.54328	25.21	23.8408	0.523184	1.25496
0.54332	23.54	23.7703	0.524594	1.26213
0.54336	26.17	23.7002	0.525997	1.26935
0.5434	22.1	23.6305	0.52739	1.27663
0.54344	26.03	23.5612	0.528776	1.28396
0.54348	21	23.4924	0.530153	1.29135
0.54352	25.93	23.4239	0.531521	1.29879
0.54356	20.81	23.3559	0.532881	1.30629
0.5436	25.69	23.2884	0.534233	1.31384
0.54364	19.8	23.2212	0.535576	1.32144
0.54368	25.21	23.1545	0.53691	1.32908
0.54372	20.24	23.0882	0.538235	1.33678
0.54376	24.54	23.0224	0.539552	1.34453
0.5438	20.24	22.957	0.54086	1.35233
0.54384	24.5	22.8921	0.542159	1.36017
0.54388	20.24	22.8276	0.543449	1.36807
0.54392	24.02	22.7635	0.54473	1.37601
0.54396	20.67	22.6999	0.546002	1.38401
0.544	24.16	22.6367	0.547265	1.39206
0.54404	20.95	22.574	0.548519	1.40015
0.54408	24.45	22.5118	0.549765	1.4083
0.54412	21.34	22.4499	0.551001	1.41651
0.54416	24.45	22.3886	0.552228	1.42476
0.5442	22.05	22.3277	0.553447	1.43306
0.54424	23.87	22.2672	0.554656	1.44142
0.54428	22.2	22.2072	0.555856	1.44983
0.54432	23.2	22.1477	0.557047	1.45828
0.54436	23.15	22.0886	0.558228	1.46678
0.5444	22.05	22.0299	0.559401	1.47533
0.54444	23.87	21.9718	0.560564	1.48392
0.54448	20.43	21.9141	0.561718	1.49256
0.54452	24.35	21.8569	0.562863	1.50124
0.54456	19.9	21.8001	0.563998	1.50996
0.5446	24.3	21.7438	0.565123	1.51872
0.54464	18.75	21.688	0.566239	1.52752
0.54468	23.87	21.6327	0.567345	1.53635
0.54472	18.42	21.5779	0.568442	1.54522
0.54476	23.49	21.5236	0.569528	1.55412
0.5448	17.65	21.4698	0.570605	1.56305
0.54484	22.72	21.4164	0.571672	1.57201
0.54488	18.13	21.3636	0.572728	1.581
0.54492	22.44	21.3113	0.573775	1.59003
0.54496	18.27	21.2594	0.574811	1.59908
0.545	22.2	21.2081	0.575838	1.60816
0.54504	18.85	21.1573	0.576854	1.61726
0.54508	22.15	21.107	0.57786	1.6264
0.54512	19.23	21.0572	0.578856	1.63556
0.54516	22.53	21.0079	0.579842	1.64475
0.5452	19.42	20.9591	0.580817	1.65396
0.54524	22.58	20.9109	0.581783	1.66319
0.54528	20.09	20.8631	0.582738	1.67244
0.54532	22.44	20.8158	0.583683	1.68172
0.54536	20.52	20.7691	0.584618	1.69101
0.5454	21.96	20.7228	0.585543	1.70032
0.54544	21.72	20.6771	0.586458	1.70964
0.54548	21.29	20.6319	0.587362	1.71897
0.54552	22.77	20.5872	0.588256	1.72832
0.54556	19.76	20.543	0.58914	1.73767
0.5456	22.87	20.4993	0.590014	1.74702
0.54564	18.61	20.4562	0.590877	1.75638
0.54568	23.2	20.4135	0.59173	1.76575
0.54572	17.89	20.3714	0.592572	1.77511
0.54576	23.01	20.3298	0.593403	1.78448
0.5458	17.22	20.2888	0.594224	1.79385
0.54584	22.1	20.2483	0.595035	1.80321
0.54588	16.93	20.2083	0.595834	1.81258
0.54592	21.86	20.1688	0.596623	1.82194
0.54596	17.32	20.1299	0.597401	1.8313
0.546	21.14	20.0916	0.598168	1.84065
0.54604	16.93	20.0538	0.598925	1.85
0.54608	21.1	20.0165	0.59967	1.85933
0.54612	17.36	19.9798	0.600404	1.86866
0.54616	21.24	19.9436	0.601127	1.87798
0.5462	17.89	19.908	0.60184	1.88729
0.54624	21.29	19.873	0.602541	1.89658
0.54628	17.75	19.8384	0.603231	1.90585
0.54632	21.96	19.8045	0.60391	1.9151
0.54636	18.66	19.7711	0.604579	1.92433
0.5464	22.05	19.7382	0.605236	1.93354
0.54644	19.56	19.7059	0.605882	1.94272
0.54648	20.71	19.6741	0.606517	1.95187
0.54652	20.14	19.6429	0.607141	1.96098
0.54656	19.76	19.6123	0.607755	1.97007
0.5466	21	19.5822	0.608357	1.97912
0.54664	18.8	19.5526	0.608948	1.98813
0.54668	21.67	19.5236	0.609527	1.9971
0.54672	17.84	19.4952	0.610096	2.00602
0.54676	21.72	19.4673	0.610653	2.01491
0.5468	16.84	19.44	0.611199	2.02374
0.54684	21.96	19.4133	0.611734	2.03253
0.54688	16.12	19.3871	0.612258	2.04126
0.54692	21.53	19.3615	0.61277	2.04994
0.54696	15.74	19.3365	0.61327	2.05855
0.547	20.62	19.312	0.613759	2.06711
0.54704	16.07	19.2882	0.614237	2.0756
0.54708	20.71	19.2649	0.614703	2.08402
0.54712	16.17	19.2421	0.615157	2.09237
0.54716	20.19	19.22	0.6156	2.10064
0.5472	16.79	19.1984	0.616031	2.10883
0.54724	20.24	19.1774	0.616451	2.11694
0.54728	16.79	19.157	0.61686	2.12496
0.54732	20.62	19.1372	0.617256	2.13289
0.54736	17.41	19.1179	0.617642	2.14074
0.5474	21.1	19.0992	0.618016	2.14849
0.54744	17.79	19.0811	0.618378	2.15614
0.54748	21.1	19.0635	0.618729	2.1637
0.54752	18.32	19.0466	0.619069	2.17116
0.54756	20.47	19.0301	0.619397	2.17852
0.5476	19.18	19.0143	0.619714	2.18577
0.54764	19.28	18.999	0.62002	2.19293
0.54768	20.38	18.9843	0.620314	2.19998
0.54772	18.42	18.9701	0.620597	2.20692
0.54776	21.14	18.9566	0.620869	2.21376
0.5478	16.88	18.9435	0.621129	2.22049
0.54784	21.48	18.9311	0.621378	2.2271
0.54788	16.55	18.9192	0.621616	2.2336
0.54792	21.29	18.9079	0.621842	2.23998
0.54796	15.35	18.8972	0.622057	2.24625
0.548	20.71	18.887	0.62226	2.25239
0.54804	15.35	18.8774	0.622452	2.25842
0.54808	20.04	18.8684	0.622633	2.26431
0.54812	15.07	18.8599	0.622802	2.27008
0.54816	20.24	18.852	0.62296	2.27572
0.5482	15.59	18.8447	0.623106	2.28122
0.54824	19.47	18.8379	0.623241	2.28659
0.54828	16.12	18.8317	0.623365	2.29181
0.54832	19.95	18.8261	0.623478	2.2969
0.54836	16.65	18.821	0.623579	2.30184
0.5484	20.52	18.8165	0.623669	2.30664
0.54844	16.88	18.8126	0.623749	2.31129
0.54848	20.52	18.8091	0.623817	2.31578
0.54852	17.65	18.8063	0.623874	2.32012
0.54856	20.62	18.8039	0.623921	2.3243
0.5486	18.37	18.8022	0.623957	2.32831
0.54864	20	18.8009	0.623982	2.33217
0.54868	18.61	18.8002	0.623997	2.33585
0.54872	19.13	18.8	0.624001	2.33937
				2.34271
