# Supplementary material for: Shear Thickening Fluids in Cork Agglomerates: An Exploration of Advantages and Drawbacks
Source: Preprints.org preprint supplement (doi:10.20944/preprints202304.0004.v1), 2023-04-03
Supplement: Supplementary file 5 [file A20-report.pdf › Supplementary Material/SEM Images/20� STF/A20-report.pdf]

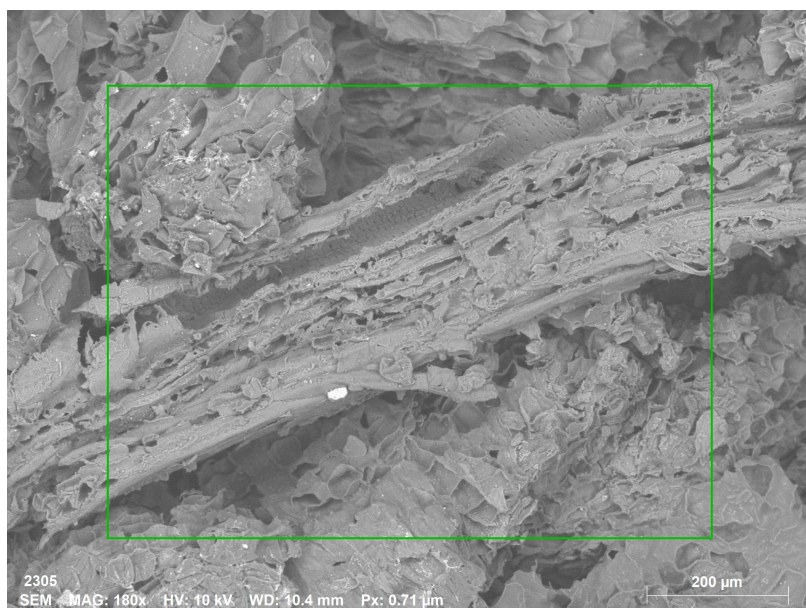

| Name | Date       | Time     | HV<br>[kV] | Mag  | WD<br>[mm] |
|------|------------|----------|------------|------|------------|
| 2305 | 27/07/2022 | 10:31:01 | 10.0 keV   | 180x | 10.4 mm    |

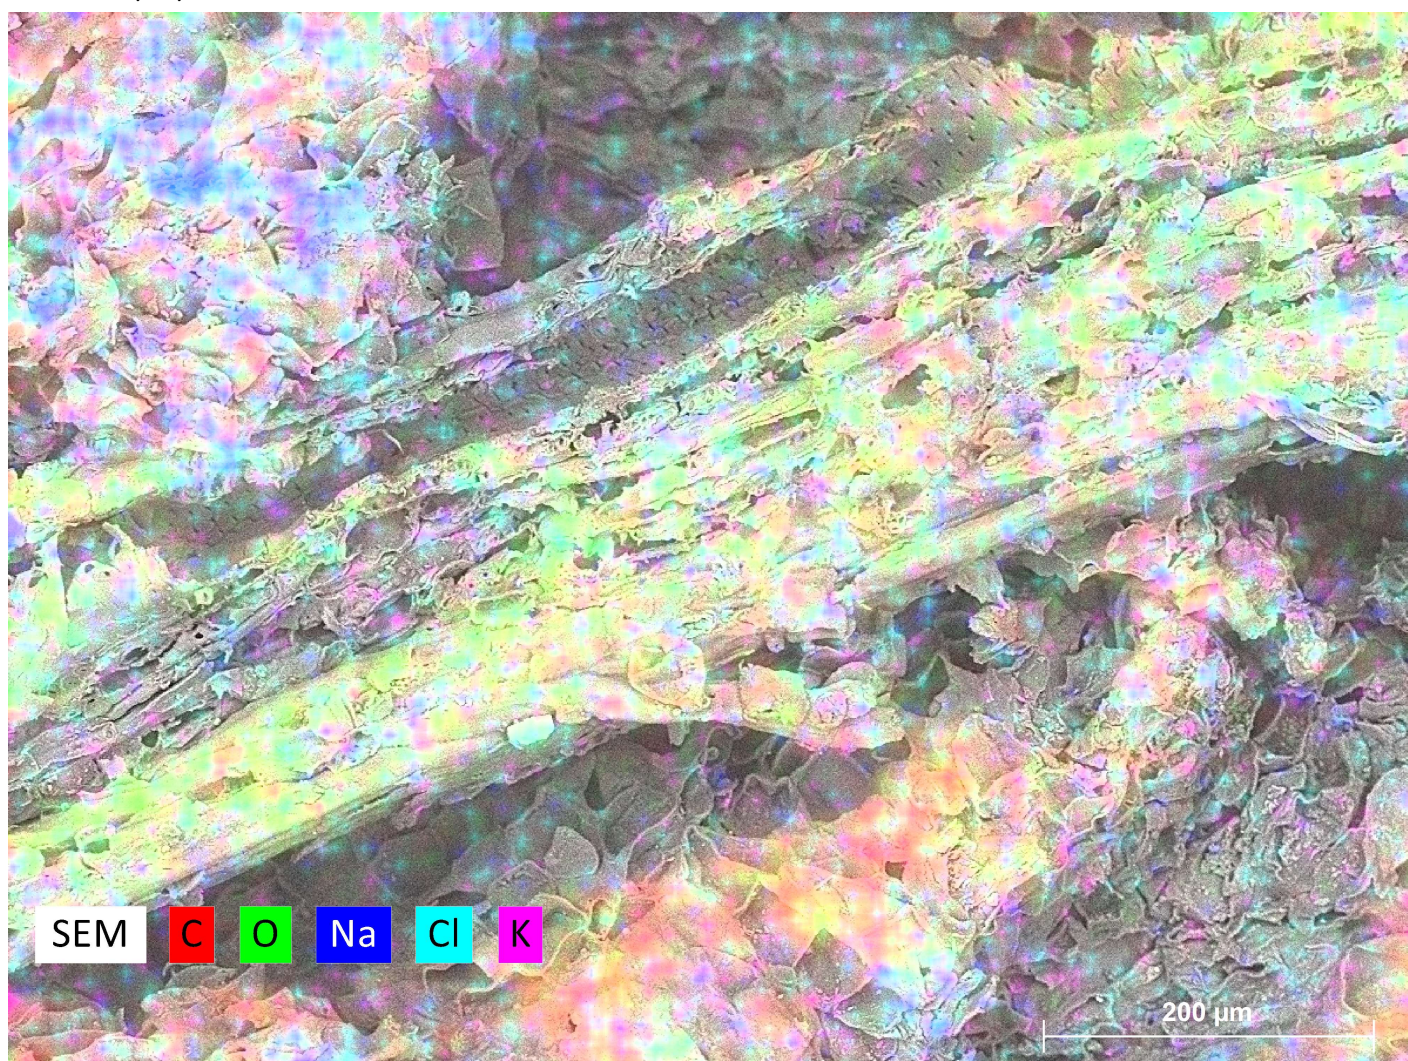

| Name | Date       | Time     | HV<br>[kV] | Mag  | WD<br>[mm] |
|------|------------|----------|------------|------|------------|
| 2305 | 27/07/2022 | 10:32:29 | 10.0 keV   | 180x | 10.4 mm    |



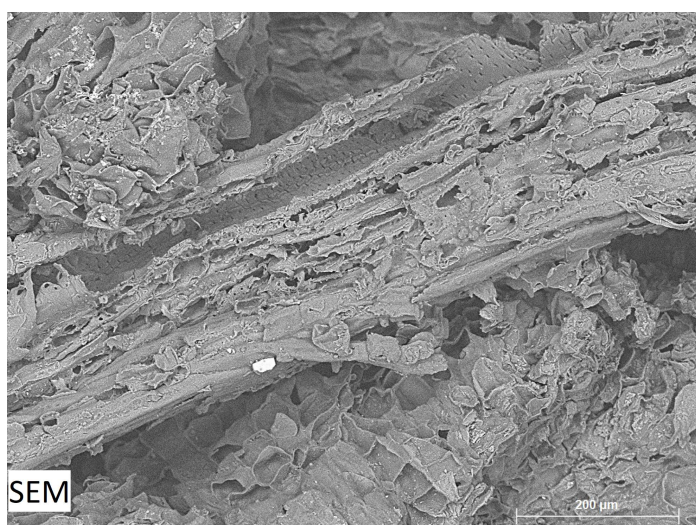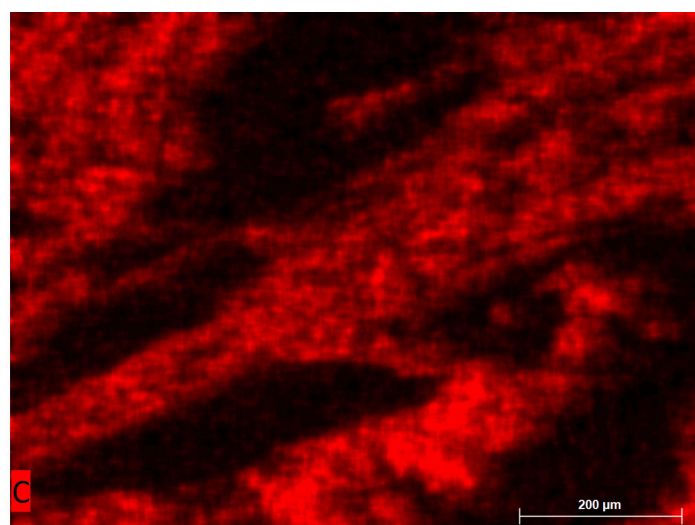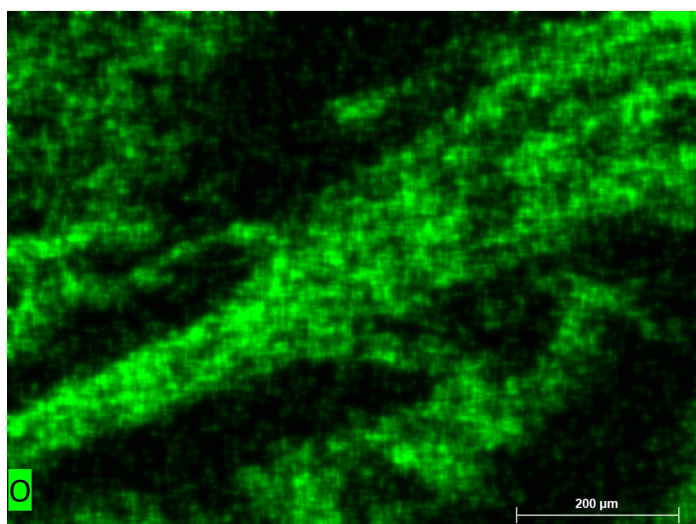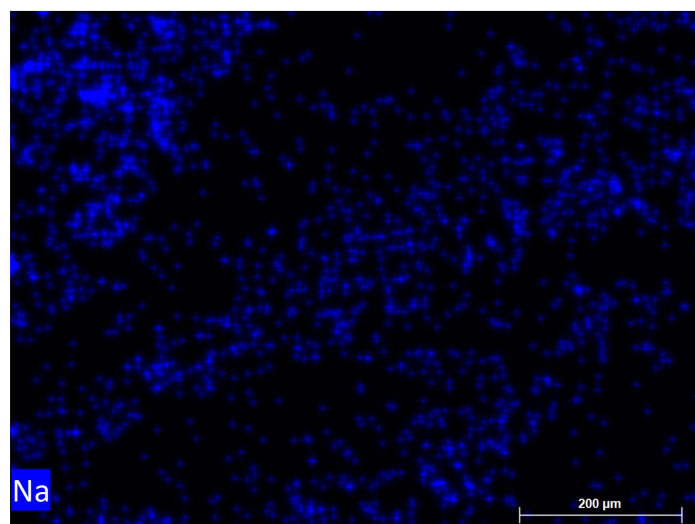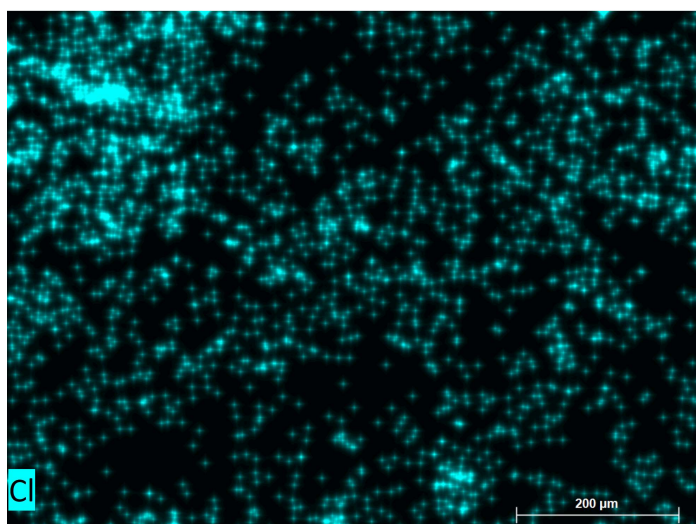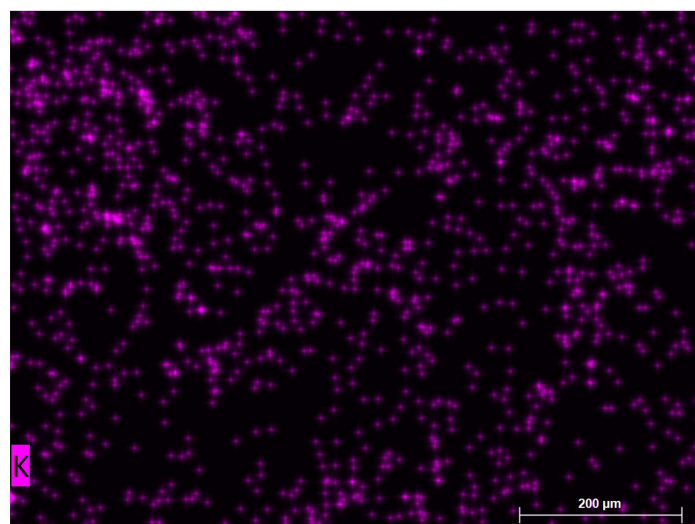

# Application Note

Company / Department

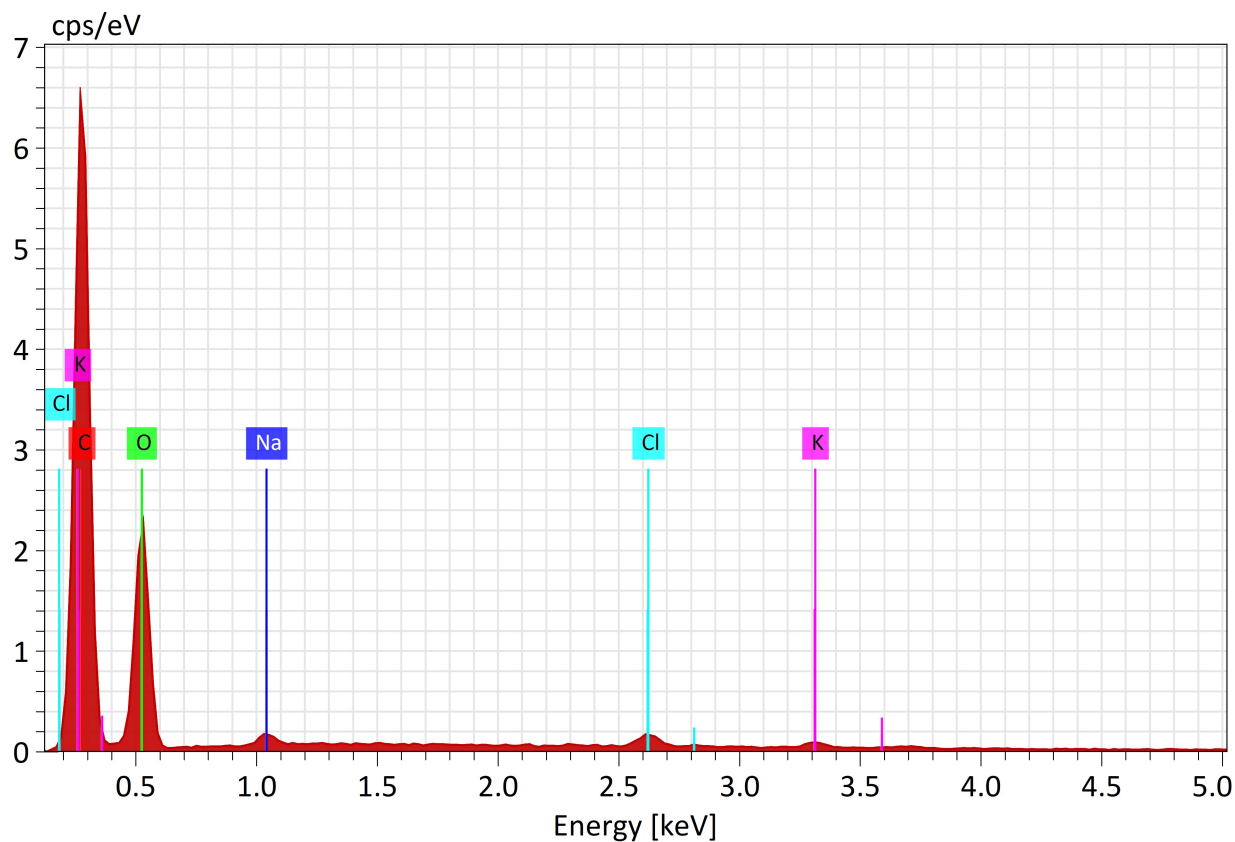

## Map

| Element | At. No. | Netto      | Mass [%]      | Mass Norm. [%] | Atom [%]      | abs. error [%]<br>(1 sigma) | rel. error [%]<br>(1 sigma) |
|---------|---------|------------|---------------|----------------|---------------|-----------------------------|-----------------------------|
| C       | 6       | 43495      | 66.19         | 66.19          | 72.86         | 2.66                        | 4.02                        |
| O       | 8       | 16241      | 31.82         | 31.82          | 26.30         | 1.49                        | 4.68                        |
| Na      | 11      | 874        | 0.62          | 0.62           | 0.36          | 0.06                        | 9.57                        |
| Cl      | 17      | 1344       | 0.89          | 0.89           | 0.33          | 0.06                        | 6.25                        |
| K       | 19      | 579        | 0.47          | 0.47           | 0.16          | 0.04                        | 9.11                        |
|         |         | <b>Sum</b> | <b>100.00</b> | <b>100.00</b>  | <b>100.00</b> |                             |                             |



# Application Note

Company / Department

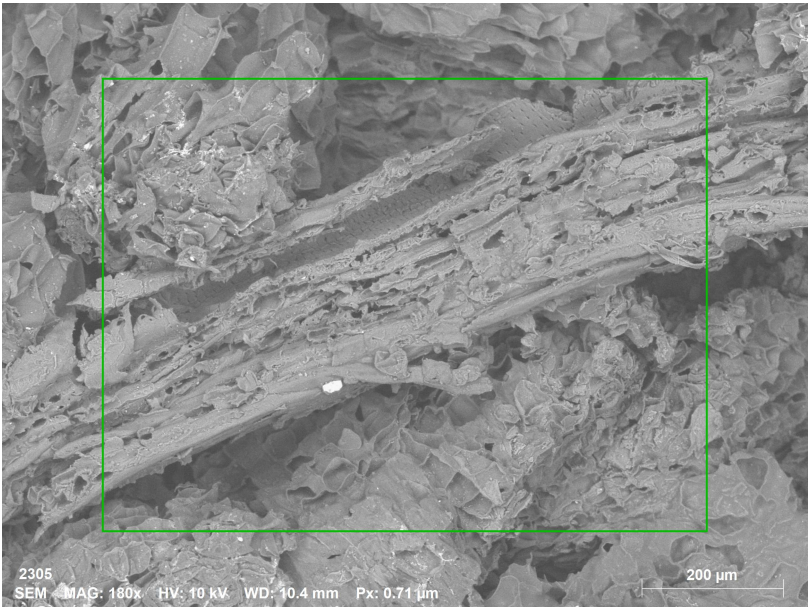

| Name | Date       | Time     | HV<br>[kV] | Mag  | WD<br>[mm] |
|------|------------|----------|------------|------|------------|
| 2305 | 27/07/2022 | 10:31:01 | 10.0 keV   | 180x | 10.4 mm    |

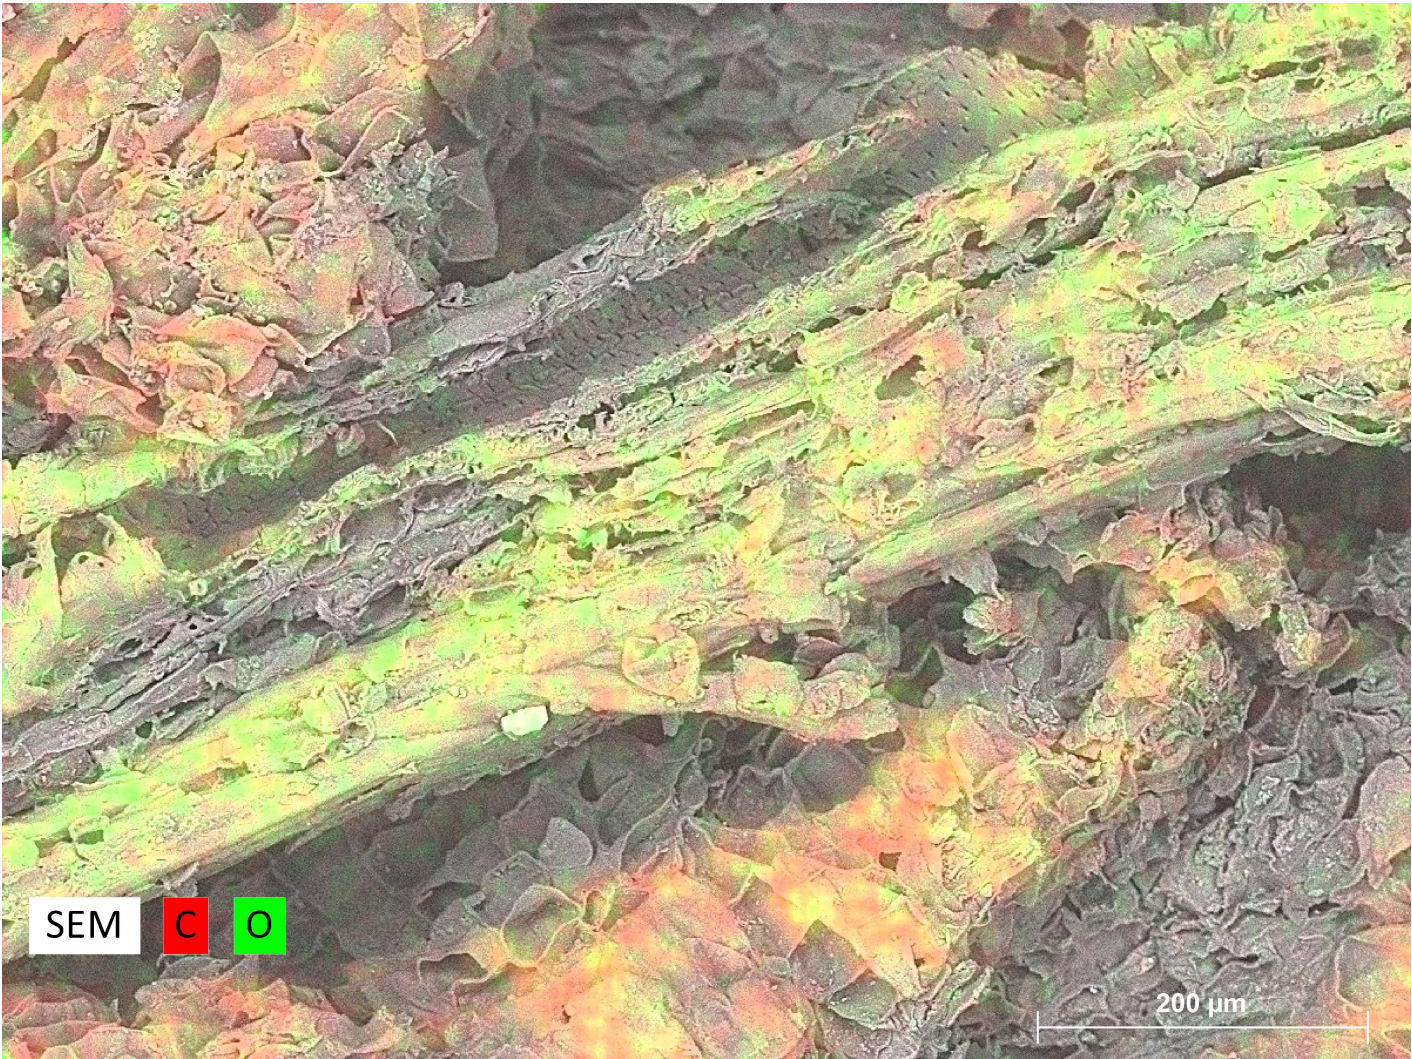

| Name | Date       | Time     | HV<br>[kV] | Mag  | WD<br>[mm] |
|------|------------|----------|------------|------|------------|
| 2305 | 27/07/2022 | 10:32:29 | 10.0 keV   | 180x | 10.4 mm    |



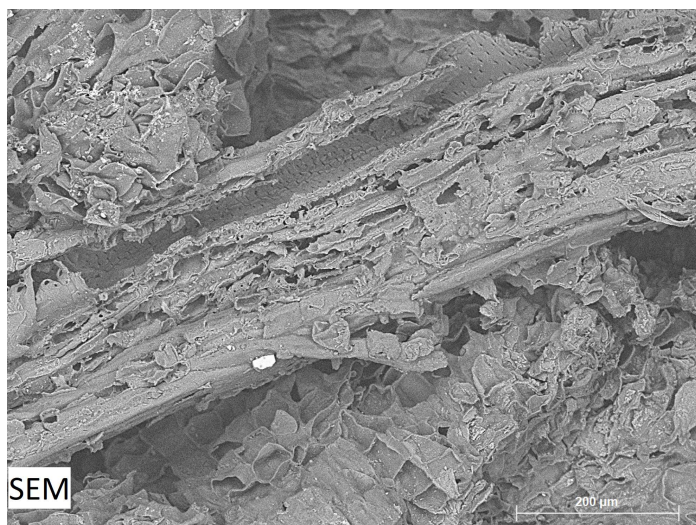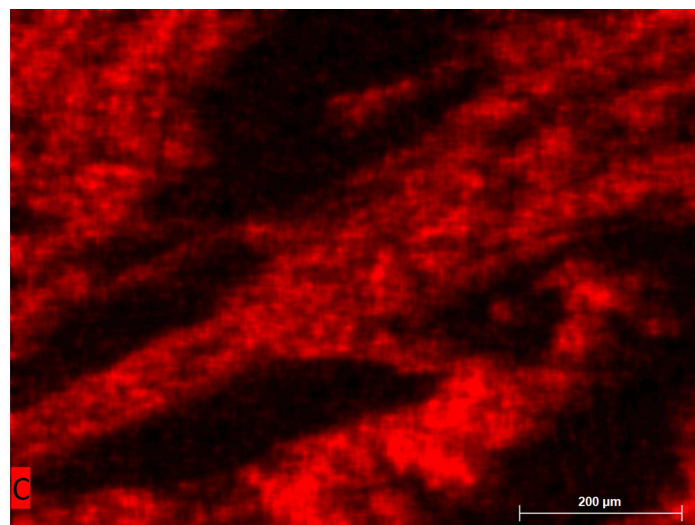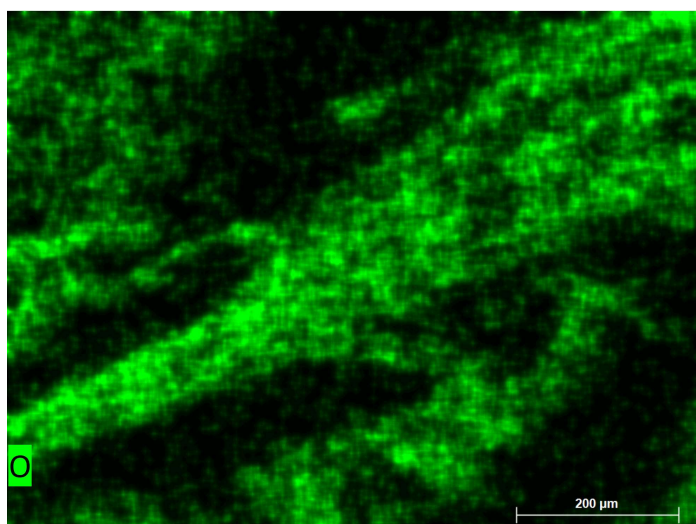



# Application Note

Company / Department

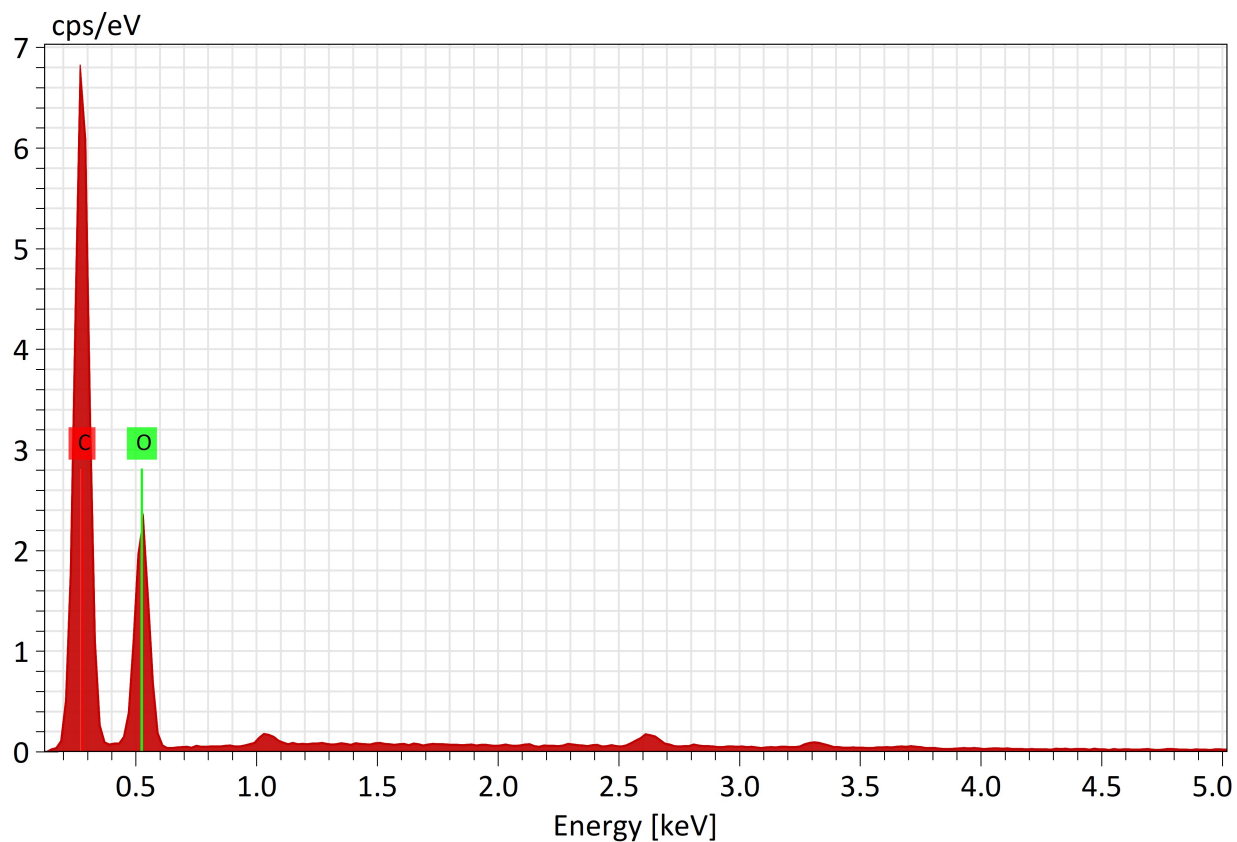

Map

| Element | At. No. | Netto      | Mass [%]      | Mass Norm. [%] | Atom [%]      | abs. error [%]<br>(1 sigma) | rel. error [%]<br>(1 sigma) |
|---------|---------|------------|---------------|----------------|---------------|-----------------------------|-----------------------------|
| C       | 6       | 46907      | 67.38         | 67.38          | 73.34         | 2.61                        | 3.87                        |
| O       | 8       | 16239      | 32.62         | 32.62          | 26.66         | 1.52                        | 4.66                        |
|         |         | <b>Sum</b> | <b>100.00</b> | <b>100.00</b>  | <b>100.00</b> |                             |                             |
