# Supplementary material for: Shear Thickening Fluids in Cork Agglomerates: An Exploration of Advantages and Drawbacks
Source: Preprints.org preprint supplement (doi:10.20944/preprints202304.0004.v1), 2023-04-03
Supplement: Supplementary file 5 [file CG_x_10.xlsx]

## Sheet: data
Time - Force (Bridge) - Force	Amplitude - Force (Bridge) - Force	data
0	29.63	-29.63		-1
4e-05	43.04	-43.04
8e-05	12.75	-12.75
0.00012	30.52	-30.52
0.00016	29.05	-29.05
0.0002	39.98	-39.98
0.00024	24.77	-24.77
0.00028	-3.376	3.376
0.00032	63.13	-63.13
0.00036	38.62	-38.62
0.0004	18.15	-18.15
0.00044	41.59	-41.59
0.00048	15.24	-15.24
0.00052	54.19	-54.19
0.00056	44.4	-44.4
0.0006	26.62	-26.62
0.00064	30.99	-30.99
0.00068	32.66	-32.66
0.00072	29.22	-29.22
0.00076	18.27	-18.27
0.0008	43.44	-43.44
0.00084	33.07	-33.07
0.00088	33.13	-33.13
0.00092	34.6	-34.6
0.00096	31.04	-31.04
0.001	34.34	-34.34
0.00104	21.16	-21.16
0.00108	34.37	-34.37
0.00112	27.26	-27.26
0.00116	47.61	-47.61
0.0012	37.95	-37.95
0.00124	54.51	-54.51
0.00128	42.32	-42.32
0.00132	22.55	-22.55
0.00136	31.33	-31.33
0.0014	21.88	-21.88
0.00144	58.59	-58.59
0.00148	20.55	-20.55
0.00152	29.8	-29.8
0.00156	28.7	-28.7
0.0016	50.87	-50.87
0.00164	41.97	-41.97
0.00168	27.03	-27.03
0.00172	32.66	-32.66
0.00176	33.88	-33.88
0.0018	48.07	-48.07
0.00184	35.9	-35.9
0.00188	43.76	-43.76
0.00192	34.77	-34.77
0.00196	41.65	-41.65
0.002	46.25	-46.25
0.00204	38.21	-38.21
0.00208	21.97	-21.97
0.00212	38.73	-38.73
0.00216	37.63	-37.63
0.0022	38.91	-38.91
0.00224	38.07	-38.07
0.00228	25.21	-25.21
0.00232	12.92	-12.92
0.00236	35.24	-35.24
0.0024	30	-30
0.00244	32.03	-32.03
0.00248	35.99	-35.99
0.00252	50.76	-50.76
0.00256	43.93	-43.93
0.0026	31.51	-31.51
0.00264	32.4	-32.4
0.00268	15.64	-15.64
0.00272	46.65	-46.65
0.00276	26.48	-26.48
0.0028	32.92	-32.92
0.00284	36.02	-36.02
0.00288	22.37	-22.37
0.00292	21.71	-21.71
0.00296	41.51	-41.51
0.003	26.88	-26.88
0.00304	39.31	-39.31
0.00308	25.47	-25.47
0.00312	30.99	-30.99
0.00316	29.6	-29.6
0.0032	33.01	-33.01
0.00324	27	-27
0.00328	37.37	-37.37
0.00332	56.48	-56.48
0.00336	27.87	-27.87
0.0034	43.44	-43.44
0.00344	38.15	-38.15
0.00348	30	-30
0.00352	36.19	-36.19
0.00356	40	-40
0.0036	35.38	-35.38
0.00364	33.67	-33.67
0.00368	36.39	-36.39
0.00372	36.13	-36.13
0.00376	26.19	-26.19
0.0038	31.88	-31.88
0.00384	41.74	-41.74
0.00388	14.63	-14.63
0.00392	46.48	-46.48
0.00396	40.35	-40.35
0.004	27.06	-27.06
0.00404	28.21	-28.21
0.00408	28.27	-28.27
0.00412	37.06	-37.06
0.00416	25.5	-25.5
0.0042	35.47	-35.47
0.00424	33.41	-33.41
0.00428	38.15	-38.15
0.00432	19.8	-19.8
0.00436	23.39	-23.39
0.0044	36.04	-36.04
0.00444	19.66	-19.66
0.00448	49.14	-49.14
0.00452	39.72	-39.72
0.00456	12.63	-12.63
0.0046	29.54	-29.54
0.00464	21.48	-21.48
0.00468	29.51	-29.51
0.00472	41.33	-41.33
0.00476	63.01	-63.01
0.0048	80.55	-80.55
0.00484	76.82	-76.82
0.00488	42.43	-42.43
0.00492	45.29	-45.29
0.00496	55.61	-55.61
0.005	128.9	-128.9
0.00504	65.35	-65.35
0.00508	47.35	-47.35
0.00512	62.03	-62.03
0.00516	81.48	-81.48
0.0052	61.91	-61.91
0.00524	67.06	-67.06
0.00528	74.6	-74.6
0.00532	42.23	-42.23
0.00536	61.39	-61.39
0.0054	71.45	-71.45
0.00544	96.68	-96.68
0.00548	39.95	-39.95
0.00552	72.6	-72.6
0.00556	92.81	-92.81
0.0056	91.8	-91.8
0.00564	61.71	-61.71
0.00568	34.2	-34.2
0.00572	82.14	-82.14
0.00576	62.92	-62.92
0.0058	99.11	-99.11
0.00584	95.44	-95.44
0.00588	47.46	-47.46
0.00592	56.22	-56.22
0.00596	60.35	-60.35
0.006	85.61	-85.61
0.00604	52.52	-52.52
0.00608	33.07	-33.07
0.00612	87.29	-87.29
0.00616	85.52	-85.52
0.0062	84.45	-84.45
0.00624	45.26	-45.26
0.00628	58.56	-58.56
0.00632	67	-67
0.00636	83.96	-83.96
0.0064	60.03	-60.03
0.00644	40.7	-40.7
0.00648	75.87	-75.87
0.00652	90.35	-90.35
0.00656	93.7	-93.7
0.0066	44.63	-44.63
0.00664	60.47	-60.47
0.00668	40.93	-40.93
0.00672	78.85	-78.85
0.00676	67.17	-67.17
0.0068	51.59	-51.59
0.00684	66.48	-66.48
0.00688	65.41	-65.41
0.00692	89.14	-89.14
0.00696	72.26	-72.26
0.007	61.07	-61.07
0.00704	29.63	-29.63
0.00708	66.54	-66.54
0.00712	59.71	-59.71
0.00716	70.58	-70.58
0.0072	70.06	-70.06
0.00724	38.33	-38.33
0.00728	53.41	-53.41
0.00732	75.75	-75.75
0.00736	70.18	-70.18
0.0074	81.36	-81.36
0.00744	58.76	-58.76
0.00748	78.73	-78.73
0.00752	47.72	-47.72
0.00756	52	-52
0.0076	46.97	-46.97
0.00764	40.9	-40.9
0.00768	66.74	-66.74
0.00772	41.8	-41.8
0.00776	51.59	-51.59
0.0078	58.01	-58.01
0.00784	43.13	-43.13
0.00788	41.83	-41.83
0.00792	44.63	-44.63
0.00796	72.66	-72.66
0.008	68.99	-68.99
0.00804	44.6	-44.6
0.00808	52.35	-52.35
0.00812	51.42	-51.42
0.00816	53.13	-53.13
0.0082	60.09	-60.09
0.00824	44.46	-44.46
0.00828	48.07	-48.07
0.00832	46.51	-46.51
0.00836	39.86	-39.86
0.0084	51.59	-51.59
0.00844	51.19	-51.19
0.00848	42.66	-42.66
0.00852	39.31	-39.31
0.00856	25.26	-25.26
0.0086	45.96	-45.96
0.00864	51.54	-51.54
0.00868	58.44	-58.44
0.00872	39.14	-39.14
0.00876	46.94	-46.94
0.0088	31.1	-31.1
0.00884	32.87	-32.87
0.00888	29.86	-29.86
0.00892	37.32	-37.32
0.00896	38.39	-38.39
0.009	48.62	-48.62
0.00904	32.29	-32.29
0.00908	21.91	-21.91
0.00912	25.09	-25.09
0.00916	42.98	-42.98
0.0092	32.58	-32.58
0.00924	32	-32
0.00928	31.36	-31.36
0.00932	30.24	-30.24
0.00936	40.93	-40.93
0.0094	17.92	-17.92
0.00944	54.6	-54.6
0.00948	36.02	-36.02
0.00952	44.92	-44.92
0.00956	45.67	-45.67
0.0096	34.69	-34.69
0.00964	52.11	-52.11
0.00968	19.51	-19.51
0.00972	46.39	-46.39
0.00976	24.08	-24.08
0.0098	25.38	-25.38
0.00984	23.44	-23.44
0.00988	32.26	-32.26
0.00992	49.83	-49.83
0.00996	32.35	-32.35
0.01	34.34	-34.34
0.01004	11.97	-11.97
0.01008	45.24	-45.24
0.01012	27.66	-27.66
0.01016	35.15	-35.15
0.0102	17.63	-17.63
0.01024	34.51	-34.51
0.01028	41.8	-41.8
0.01032	29.8	-29.8
0.01036	19.66	-19.66
0.0104	12.84	-12.84
0.01044	37.23	-37.23
0.01048	16.88	-16.88
0.01052	34.63	-34.63
0.01056	38.85	-38.85
0.0106	901m	-0.901
0.01064	12.55	-12.55
0.01068	32.26	-32.26
0.01072	33.39	-33.39
0.01076	34.17	-34.17
0.0108	25.5	-25.5
0.01084	21.13	-21.13
0.01088	43.91	-43.91
0.01092	42.17	-42.17
0.01096	46.3	-46.3
0.011	11.36	-11.36
0.01104	10.73	-10.73
0.01108	31.28	-31.28
0.01112	21.42	-21.42
0.01116	32.81	-32.81
0.0112	24.48	-24.48
0.01124	21.59	-21.59
0.01128	25.18	-25.18
0.01132	29.43	-29.43
0.01136	12.35	-12.35
0.0114	13.47	-13.47
0.01144	24.74	-24.74
0.01148	17.87	-17.87
0.01152	33.27	-33.27
0.01156	-3.434	3.434
0.0116	18.36	-18.36
0.01164	20.58	-20.58
0.01168	32.75	-32.75
0.01172	25.06	-25.06
0.01176	8.473	-8.473
0.0118	24.34	-24.34
0.01184	20.06	-20.06
0.01188	22.98	-22.98
0.01192	25.64	-25.64
0.01196	17.14	-17.14
0.012	19.63	-19.63
0.01204	9.138	-9.138
0.01208	18.82	-18.82
0.01212	32.14	-32.14
0.01216	10.61	-10.61
0.0122	21.36	-21.36
0.01224	23.24	-23.24
0.01228	31.48	-31.48
0.01232	18.07	-18.07
0.01236	25.47	-25.47
0.0124	21.16	-21.16
0.01244	42.43	-42.43
0.01248	24.57	-24.57
0.01252	18.59	-18.59
0.01256	22.87	-22.87
0.0126	19.17	-19.17
0.01264	19.92	-19.92
0.01268	23.96	-23.96
0.01272	33.62	-33.62
0.01276	24.43	-24.43
0.0128	9.774	-9.774
0.01284	23.85	-23.85
0.01288	11.48	-11.48
0.01292	45.81	-45.81
0.01296	33.59	-33.59
0.013	10.5	-10.5
0.01304	12.72	-12.72
0.01308	32.63	-32.63
0.01312	16.71	-16.71
0.01316	35.52	-35.52
0.0132	15.9	-15.9
0.01324	28.82	-28.82
0.01328	24.98	-24.98
0.01332	14.77	-14.77
0.01336	27.61	-27.61
0.0134	43.79	-43.79
0.01344	14.74	-14.74
0.01348	16.94	-16.94
0.01352	26.88	-26.88
0.01356	35.76	-35.76
0.0136	32.09	-32.09
0.01364	23.33	-23.33
0.01368	33.94	-33.94
0.01372	7.375	-7.375
0.01376	32.46	-32.46
0.0138	27.61	-27.61
0.01384	34.2	-34.2
0.01388	26.83	-26.83
0.01392	33.01	-33.01
0.01396	32	-32
0.014	19.08	-19.08
0.01404	20.03	-20.03
0.01408	22.2	-22.2
0.01412	23.47	-23.47
0.01416	36.3	-36.3
0.0142	38.82	-38.82
0.01424	39.28	-39.28
0.01428	43.01	-43.01
0.01432	33.1	-33.1
0.01436	35.09	-35.09
0.0144	40.18	-40.18
0.01444	15.9	-15.9
0.01448	16.8	-16.8
0.01452	34.95	-34.95
0.01456	31.74	-31.74
0.0146	19.74	-19.74
0.01464	13.36	-13.36
0.01468	16.19	-16.19
0.01472	13.16	-13.16
0.01476	24.72	-24.72
0.0148	-110.5m	0.1105
0.01484	-3.232	3.232
0.01488	12.55	-12.55
0.01492	18.5	-18.5
0.01496	-6.18	6.18
0.015	-33.35	33.35
0.01504	-31.87	31.87
0.01508	20.58	-20.58
0.01512	-8.839	8.839
0.01516	-10.23	10.23
0.0152	-16.35	16.35
0.01524	15.84	-15.84
0.01528	-2.943	2.943
0.01532	-24.76	24.76
0.01536	-10.49	10.49
0.0154	-9.85	9.85
0.01544	-2.278	2.278
0.01548	-26.96	26.96
0.01552	-4.908	4.908
0.01556	15.38	-15.38
0.0156	-25.8	25.8
0.01564	14.98	-14.98
0.01568	5.525	-5.525
0.01572	38.82	-38.82
0.01576	-28.29	28.29
0.0158	-2.191	2.191
0.01584	-11.24	11.24
0.01588	15.24	-15.24
0.01592	33.88	-33.88
0.01596	-4.272	4.272
0.016	4.427	-4.427
0.01604	22.23	-22.23
0.01608	33.47	-33.47
0.01612	11.77	-11.77
0.01616	-26.5	26.5
0.0162	38.21	-38.21
0.01624	48.91	-48.91
0.01628	15.84	-15.84
0.01632	20.5	-20.5
0.01636	-11.27	11.27
0.0164	20.32	-20.32
0.01644	40.29	-40.29
0.01648	17.66	-17.66
0.01652	4.109	-4.109
0.01656	-19.53	19.53
0.0166	1.739	-1.739
0.01664	13.82	-13.82
0.01668	35.64	-35.64
0.01672	25.58	-25.58
0.01676	7.722	-7.722
0.0168	958.8m	-0.9588
0.01684	16.91	-16.91
0.01688	1.652	-1.652
0.01692	19.69	-19.69
0.01696	20.73	-20.73
0.017	18.94	-18.94
0.01704	19.43	-19.43
0.01708	23.76	-23.76
0.01712	10.41	-10.41
0.01716	22.98	-22.98
0.0172	-3.868	3.868
0.01724	2.259	-2.259
0.01728	8.618	-8.618
0.01732	28.15	-28.15
0.01736	17.49	-17.49
0.0174	24.69	-24.69
0.01744	15.87	-15.87
0.01748	31.16	-31.16
0.01752	12.49	-12.49
0.01756	14.63	-14.63
0.0176	-775.3m	0.7753
0.01764	23.36	-23.36
0.01768	35.12	-35.12
0.01772	27.58	-27.58
0.01776	21.42	-21.42
0.0178	14.46	-14.46
0.01784	8.3	-8.3
0.01788	18.44	-18.44
0.01792	29.14	-29.14
0.01796	9.34	-9.34
0.018	31.65	-31.65
0.01804	21.65	-21.65
0.01808	-370.6m	0.3706
0.01812	14.46	-14.46
0.01816	30.87	-30.87
0.0182	-12.42	12.42
0.01824	21.45	-21.45
0.01828	21.42	-21.42
0.01832	43.07	-43.07
0.01836	38.67	-38.67
0.0184	31.62	-31.62
0.01844	4.369	-4.369
0.01848	32.72	-32.72
0.01852	8.097	-8.097
0.01856	13.36	-13.36
0.0186	23.65	-23.65
0.01864	20.64	-20.64
0.01868	21.22	-21.22
0.01872	21.91	-21.91
0.01876	32.95	-32.95
0.0188	25.64	-25.64
0.01884	35.5	-35.5
0.01888	26.85	-26.85
0.01892	36.57	-36.57
0.01896	27.32	-27.32
0.019	33.33	-33.33
0.01904	54.57	-54.57
0.01908	10	-10
0.01912	38.56	-38.56
0.01916	43.01	-43.01
0.0192	19.72	-19.72
0.01924	19.98	-19.98
0.01928	35.15	-35.15
0.01932	25.29	-25.29
0.01936	32.89	-32.89
0.0194	29.08	-29.08
0.01944	45.18	-45.18
0.01948	16.68	-16.68
0.01952	22.17	-22.17
0.01956	52.17	-52.17
0.0196	26.19	-26.19
0.01964	39.46	-39.46
0.01968	49.05	-49.05
0.01972	16.25	-16.25
0.01976	45.96	-45.96
0.0198	53.65	-53.65
0.01984	29.95	-29.95
0.01988	39.4	-39.4
0.01992	10.47	-10.47
0.01996	47.4	-47.4
0.02	8.589	-8.589
0.02004	32.75	-32.75
0.02008	31.39	-31.39
0.02012	51.97	-51.97
0.02016	15.03	-15.03
0.0202	45.87	-45.87
0.02024	16.71	-16.71
0.02028	41.71	-41.71
0.02032	24.28	-24.28
0.02036	43.79	-43.79
0.0204	32.26	-32.26
0.02044	39.95	-39.95
0.02048	37.58	-37.58
0.02052	41.45	-41.45
0.02056	37.98	-37.98
0.0206	49.77	-49.77
0.02064	27.37	-27.37
0.02068	28.07	-28.07
0.02072	34.69	-34.69
0.02076	30.03	-30.03
0.0208	39.2	-39.2
0.02084	28.15	-28.15
0.02088	31.65	-31.65
0.02092	34.89	-34.89
0.02096	24.63	-24.63
0.021	25.44	-25.44
0.02104	23.5	-23.5
0.02108	31.22	-31.22
0.02112	33.59	-33.59
0.02116	13.21	-13.21
0.0212	33.18	-33.18
0.02124	28.07	-28.07
0.02128	24.86	-24.86
0.02132	27.55	-27.55
0.02136	34.28	-34.28
0.0214	25	-25
0.02144	38.93	-38.93
0.02148	28.33	-28.33
0.02152	31.07	-31.07
0.02156	29.37	-29.37
0.0216	27.23	-27.23
0.02164	32.35	-32.35
0.02168	37.89	-37.89
0.02172	42.06	-42.06
0.02176	22	-22
0.0218	26.97	-26.97
0.02184	42.55	-42.55
0.02188	37.63	-37.63
0.02192	23.85	-23.85
0.02196	41.25	-41.25
0.022	27.14	-27.14
0.02204	17.26	-17.26
0.02208	21.39	-21.39
0.02212	15.15	-15.15
0.02216	26.51	-26.51
0.0222	34.98	-34.98
0.02224	51.28	-51.28
0.02228	23.79	-23.79
0.02232	40.03	-40.03
0.02236	41.62	-41.62
0.0224	42.87	-42.87
0.02244	29.54	-29.54
0.02248	20.18	-20.18
0.02252	30.41	-30.41
0.02256	36.51	-36.51
0.0226	29.92	-29.92
0.02264	25.96	-25.96
0.02268	26.8	-26.8
0.02272	20.78	-20.78
0.02276	21.25	-21.25
0.0228	47.92	-47.92
0.02284	41.68	-41.68
0.02288	37.72	-37.72
0.02292	28.07	-28.07
0.02296	36.74	-36.74
0.023	30.5	-30.5
0.02304	12.84	-12.84
0.02308	30.06	-30.06
0.02312	32.87	-32.87
0.02316	39.54	-39.54
0.0232	31.85	-31.85
0.02324	32.09	-32.09
0.02328	34.63	-34.63
0.02332	35.78	-35.78
0.02336	32.32	-32.32
0.0234	47	-47
0.02344	35	-35
0.02348	33.07	-33.07
0.02352	26.94	-26.94
0.02356	23.47	-23.47
0.0236	35.52	-35.52
0.02364	40.24	-40.24
0.02368	30.93	-30.93
0.02372	34.02	-34.02
0.02376	24.37	-24.37
0.0238	41.07	-41.07
0.02384	23.88	-23.88
0.02388	22.17	-22.17
0.02392	40.99	-40.99
0.02396	29.46	-29.46
0.024	46.39	-46.39
0.02404	40.58	-40.58
0.02408	36.07	-36.07
0.02412	35.21	-35.21
0.02416	30.35	-30.35
0.0242	2.78	-2.78
0.02424	45.38	-45.38
0.02428	27.2	-27.2
0.02432	35.78	-35.78
0.02436	14.4	-14.4
0.0244	46.91	-46.91
0.02444	32.17	-32.17
0.02448	21.57	-21.57
0.02452	37.26	-37.26
0.02456	27.32	-27.32
0.0246	29.89	-29.89
0.02464	21.28	-21.28
0.02468	37.14	-37.14
0.02472	45.64	-45.64
0.02476	44.74	-44.74
0.0248	102.6	-102.6
0.02484	79.92	-79.92
0.02488	76.94	-76.94
0.02492	46.19	-46.19
0.02496	78.65	-78.65
0.025	94.74	-94.74
0.02504	61.22	-61.22
0.02508	74.08	-74.08
0.02512	83.85	-83.85
0.02516	63.04	-63.04
0.0252	65.67	-65.67
0.02524	47.61	-47.61
0.02528	53.41	-53.41
0.02532	57.23	-57.23
0.02536	56.39	-56.39
0.0254	106.8	-106.8
0.02544	94.43	-94.43
0.02548	75.73	-75.73
0.02552	30.41	-30.41
0.02556	59.74	-59.74
0.0256	79.63	-79.63
0.02564	101.9	-101.9
0.02568	51.65	-51.65
0.02572	30.7	-30.7
0.02576	87.4	-87.4
0.0258	68.99	-68.99
0.02584	86.82	-86.82
0.02588	54.98	-54.98
0.02592	76.65	-76.65
0.02596	41.62	-41.62
0.026	80.64	-80.64
0.02604	28.82	-28.82
0.02608	58.62	-58.62
0.02612	76.16	-76.16
0.02616	83.15	-83.15
0.0262	63.99	-63.99
0.02624	20.52	-20.52
0.02628	50.87	-50.87
0.02632	63.27	-63.27
0.02636	65.84	-65.84
0.0264	76.07	-76.07
0.02644	67.86	-67.86
0.02648	59.83	-59.83
0.02652	70.78	-70.78
0.02656	74.17	-74.17
0.0266	87.11	-87.11
0.02664	53.39	-53.39
0.02668	35	-35
0.02672	33.39	-33.39
0.02676	49.05	-49.05
0.0268	77.03	-77.03
0.02684	60.38	-60.38
0.02688	57.03	-57.03
0.02692	22.06	-22.06
0.02696	45.38	-45.38
0.027	64.25	-64.25
0.02704	53.7	-53.7
0.02708	75.7	-75.7
0.02712	51.8	-51.8
0.02716	78.12	-78.12
0.0272	53.85	-53.85
0.02724	51.19	-51.19
0.02728	85.18	-85.18
0.02732	67.26	-67.26
0.02736	73.85	-73.85
0.0274	56.13	-56.13
0.02744	72.92	-72.92
0.02748	58.07	-58.07
0.02752	55.55	-55.55
0.02756	47.66	-47.66
0.0276	62.58	-62.58
0.02764	64.6	-64.6
0.02768	38.47	-38.47
0.02772	66.48	-66.48
0.02776	33.27	-33.27
0.0278	47.29	-47.29
0.02784	28.04	-28.04
0.02788	45.24	-45.24
0.02792	58.56	-58.56
0.02796	45.61	-45.61
0.028	60.41	-60.41
0.02804	63.39	-63.39
0.02808	46.85	-46.85
0.02812	25.81	-25.81
0.02816	54.89	-54.89
0.0282	56.48	-56.48
0.02824	59.17	-59.17
0.02828	30.15	-30.15
0.02832	51.82	-51.82
0.02836	60.76	-60.76
0.0284	32.89	-32.89
0.02844	56.1	-56.1
0.02848	56.77	-56.77
0.02852	30.06	-30.06
0.02856	34.72	-34.72
0.0286	42.66	-42.66
0.02864	42.69	-42.69
0.02868	66.97	-66.97
0.02872	25	-25
0.02876	64.69	-64.69
0.0288	63.73	-63.73
0.02884	38.93	-38.93
0.02888	23.85	-23.85
0.02892	54.05	-54.05
0.02896	50.78	-50.78
0.029	46.25	-46.25
0.02904	17.95	-17.95
0.02908	36.62	-36.62
0.02912	37.03	-37.03
0.02916	15.35	-15.35
0.0292	37.78	-37.78
0.02924	46.13	-46.13
0.02928	40.47	-40.47
0.02932	11.8	-11.8
0.02936	45.5	-45.5
0.0294	39.51	-39.51
0.02944	19.63	-19.63
0.02948	37.06	-37.06
0.02952	42.49	-42.49
0.02956	36.16	-36.16
0.0296	19.86	-19.86
0.02964	29.86	-29.86
0.02968	14.95	-14.95
0.02972	31.13	-31.13
0.02976	40.32	-40.32
0.0298	25.93	-25.93
0.02984	11.88	-11.88
0.02988	37.89	-37.89
0.02992	43.1	-43.1
0.02996	28.47	-28.47
0.03	53.36	-53.36
0.03004	22.69	-22.69
0.03008	45.67	-45.67
0.03012	45.21	-45.21
0.03016	-6.469	6.469
0.0302	33.91	-33.91
0.03024	10.15	-10.15
0.03028	35.41	-35.41
0.03032	17.58	-17.58
0.03036	26.39	-26.39
0.0304	34.92	-34.92
0.03044	23.13	-23.13
0.03048	41.22	-41.22
0.03052	32.06	-32.06
0.03056	3.936	-3.936
0.0306	23.21	-23.21
0.03064	42.66	-42.66
0.03068	32.35	-32.35
0.03072	24.95	-24.95
0.03076	43.85	-43.85
0.0308	20.29	-20.29
0.03084	11.22	-11.22
0.03088	29.77	-29.77
0.03092	38.1	-38.1
0.03096	44.17	-44.17
0.031	10.21	-10.21
0.03104	33.36	-33.36
0.03108	19.92	-19.92
0.03112	23.01	-23.01
0.03116	25.35	-25.35
0.0312	17.46	-17.46
0.03124	22.35	-22.35
0.03128	13.16	-13.16
0.03132	25.99	-25.99
0.03136	19.14	-19.14
0.0314	21.45	-21.45
0.03144	20.12	-20.12
0.03148	21.33	-21.33
0.03152	29.37	-29.37
0.03156	26.19	-26.19
0.0316	32.06	-32.06
0.03164	12.63	-12.63
0.03168	22.78	-22.78
0.03172	19.25	-19.25
0.03176	20.87	-20.87
0.0318	28.73	-28.73
0.03184	28.99	-28.99
0.03188	20.99	-20.99
0.03192	24.74	-24.74
0.03196	27.26	-27.26
0.032	-5.833	5.833
0.03204	19.89	-19.89
0.03208	18.59	-18.59
0.03212	34.02	-34.02
0.03216	34.66	-34.66
0.0322	12.66	-12.66
0.03224	37.09	-37.09
0.03228	42.17	-42.17
0.03232	26.39	-26.39
0.03236	22.4	-22.4
0.0324	19.89	-19.89
0.03244	15.84	-15.84
0.03248	45.9	-45.9
0.03252	27.29	-27.29
0.03256	18.13	-18.13
0.0326	32.14	-32.14
0.03264	21.83	-21.83
0.03268	22.29	-22.29
0.03272	8.415	-8.415
0.03276	37.09	-37.09
0.0328	30.76	-30.76
0.03284	30.76	-30.76
0.03288	25.15	-25.15
0.03292	20.87	-20.87
0.03296	30.38	-30.38
0.033	43.88	-43.88
0.03304	23.42	-23.42
0.03308	15.15	-15.15
0.03312	5.236	-5.236
0.03316	13.96	-13.96
0.0332	42.35	-42.35
0.03324	10	-10
0.03328	24.51	-24.51
0.03332	35.32	-35.32
0.03336	36.94	-36.94
0.0334	24.77	-24.77
0.03344	15.29	-15.29
0.03348	28.53	-28.53
0.03352	5.352	-5.352
0.03356	46.28	-46.28
0.0336	21.22	-21.22
0.03364	24.25	-24.25
0.03368	37.66	-37.66
0.03372	12.43	-12.43
0.03376	28.68	-28.68
0.0338	22.4	-22.4
0.03384	9.687	-9.687
0.03388	17.14	-17.14
0.03392	29.83	-29.83
0.03396	21.74	-21.74
0.034	33.15	-33.15
0.03404	27.98	-27.98
0.03408	35.24	-35.24
0.03412	42.03	-42.03
0.03416	38.41	-38.41
0.0342	27.03	-27.03
0.03424	27.61	-27.61
0.03428	7.462	-7.462
0.03432	22.17	-22.17
0.03436	24.6	-24.6
0.0344	54.48	-54.48
0.03444	28.82	-28.82
0.03448	14.4	-14.4
0.03452	23.82	-23.82
0.03456	41.39	-41.39
0.0346	37.11	-37.11
0.03464	20.47	-20.47
0.03468	29.92	-29.92
0.03472	14.4	-14.4
0.03476	7.635	-7.635
0.0348	20.76	-20.76
0.03484	2.895	-2.895
0.03488	-11.7	11.7
0.03492	-16.96	16.96
0.03496	30.21	-30.21
0.035	22.43	-22.43
0.03504	-6.498	6.498
0.03508	-11.99	11.99
0.03512	22.43	-22.43
0.03516	669.8m	-0.6698
0.0352	-20.37	20.37
0.03524	-21.12	21.12
0.03528	16.68	-16.68
0.03532	28.56	-28.56
0.03536	-15.2	15.2
0.0354	-37.36	37.36
0.03544	-46.15	46.15
0.03548	23.76	-23.76
0.03552	872.1m	-0.8721
0.03556	-4.59	4.59
0.0356	-255m	0.255
0.03564	19.25	-19.25
0.03568	-8.029	8.029
0.03572	-12.28	12.28
0.03576	-13.32	13.32
0.0358	10.99	-10.99
0.03584	38.5	-38.5
0.03588	-5.486	5.486
0.03592	3.155	-3.155
0.03596	-977.6m	0.9776
0.036	43.01	-43.01
0.03604	18.1	-18.1
0.03608	-10.17	10.17
0.03612	-22.74	22.74
0.03616	6.768	-6.768
0.0362	6.623	-6.623
0.03624	42.2	-42.2
0.03628	7.144	-7.144
0.03632	17.11	-17.11
0.03636	-81.63m	0.08163
0.0364	19.11	-19.11
0.03644	-8.983	8.983
0.03648	4.716	-4.716
0.03652	-6.787	6.787
0.03656	36.91	-36.91
0.0366	30.35	-30.35
0.03664	-5.457	5.457
0.03668	26.28	-26.28
0.03672	-10.66	10.66
0.03676	27.2	-27.2
0.0368	34.2	-34.2
0.03684	-572.9m	0.5729
0.03688	13.24	-13.24
0.03692	-1.816	1.816
0.03696	14.17	-14.17
0.037	9.514	-9.514
0.03704	5.381	-5.381
0.03708	26.85	-26.85
0.03712	27.11	-27.11
0.03716	16.62	-16.62
0.0372	-2.509	2.509
0.03724	20.38	-20.38
0.03728	25.41	-25.41
0.03732	3.329	-3.329
0.03736	-2.827	2.827
0.0374	18.39	-18.39
0.03744	38.79	-38.79
0.03748	11.94	-11.94
0.03752	25.7	-25.7
0.03756	9.745	-9.745
0.0376	15.47	-15.47
0.03764	30.26	-30.26
0.03768	4.34	-4.34
0.03772	17.75	-17.75
0.03776	3.502	-3.502
0.0378	27.52	-27.52
0.03784	31.54	-31.54
0.03788	10.24	-10.24
0.03792	15.79	-15.79
0.03796	6.161	-6.161
0.038	21.31	-21.31
0.03804	22.92	-22.92
0.03808	38.3	-38.3
0.03812	28.18	-28.18
0.03816	28.65	-28.65
0.0382	10.81	-10.81
0.03824	13.82	-13.82
0.03828	28.59	-28.59
0.03832	35.29	-35.29
0.03836	30.5	-30.5
0.0384	30.06	-30.06
0.03844	22.26	-22.26
0.03848	-5.457	5.457
0.03852	12.03	-12.03
0.03856	32.95	-32.95
0.0386	40.67	-40.67
0.03864	24.69	-24.69
0.03868	30.99	-30.99
0.03872	45.18	-45.18
0.03876	31.57	-31.57
0.0388	9.427	-9.427
0.03884	7.606	-7.606
0.03888	9.831	-9.831
0.03892	40.21	-40.21
0.03896	31.04	-31.04
0.039	36.02	-36.02
0.03904	11.71	-11.71
0.03908	39.54	-39.54
0.03912	27.37	-27.37
0.03916	20.5	-20.5
0.0392	29.51	-29.51
0.03924	42.03	-42.03
0.03928	44.11	-44.11
0.03932	41.02	-41.02
0.03936	24.51	-24.51
0.0394	25.64	-25.64
0.03944	41.94	-41.94
0.03948	19.72	-19.72
0.03952	19.22	-19.22
0.03956	30.64	-30.64
0.0396	23.79	-23.79
0.03964	38.53	-38.53
0.03968	24.98	-24.98
0.03972	38.07	-38.07
0.03976	23.5	-23.5
0.0398	32.58	-32.58
0.03984	15.73	-15.73
0.03988	48.85	-48.85
0.03992	22.11	-22.11
0.03996	34.2	-34.2
0.04	23.39	-23.39
0.04004	37.87	-37.87
0.04008	32.35	-32.35
0.04012	31.88	-31.88
0.04016	41.54	-41.54
0.0402	47.03	-47.03
0.04024	1.132	-1.132
0.04028	30.35	-30.35
0.04032	61.19	-61.19
0.04036	36.83	-36.83
0.0404	27.87	-27.87
0.04044	36.83	-36.83
0.04048	28.04	-28.04
0.04052	52.03	-52.03
0.04056	30.61	-30.61
0.0406	35.06	-35.06
0.04064	41.83	-41.83
0.04068	29.34	-29.34
0.04072	42.26	-42.26
0.04076	28.27	-28.27
0.0408	45.44	-45.44
0.04084	12	-12
0.04088	31.31	-31.31
0.04092	30.35	-30.35
0.04096	30.78	-30.78
0.041	42.35	-42.35
0.04104	26.1	-26.1
0.04108	36.62	-36.62
0.04112	30.55	-30.55
0.04116	27.81	-27.81
0.0412	21.57	-21.57
0.04124	31.22	-31.22
0.04128	38.93	-38.93
0.04132	37.35	-37.35
0.04136	38.53	-38.53
0.0414	34.83	-34.83
0.04144	42.69	-42.69
0.04148	43.21	-43.21
0.04152	34.14	-34.14
0.04156	31.25	-31.25
0.0416	34.89	-34.89
0.04164	37.35	-37.35
0.04168	19.14	-19.14
0.04172	25.24	-25.24
0.04176	38.82	-38.82
0.0418	36.45	-36.45
0.04184	35.15	-35.15
0.04188	18.68	-18.68
0.04192	29.69	-29.69
0.04196	35.64	-35.64
0.042	33.65	-33.65
0.04204	23.42	-23.42
0.04208	26.45	-26.45
0.04212	42.72	-42.72
0.04216	29.72	-29.72
0.0422	34.54	-34.54
0.04224	30.35	-30.35
0.04228	47.06	-47.06
0.04232	8.213	-8.213
0.04236	31.74	-31.74
0.0424	37.43	-37.43
0.04244	14.92	-14.92
0.04248	42.78	-42.78
0.04252	35.81	-35.81
0.04256	22.52	-22.52
0.0426	31.62	-31.62
0.04264	21.54	-21.54
0.04268	34.51	-34.51
0.04272	30.52	-30.52
0.04276	52.66	-52.66
0.0428	33.18	-33.18
0.04284	29.48	-29.48
0.04288	51.42	-51.42
0.04292	44.34	-44.34
0.04296	37.69	-37.69
0.043	38.33	-38.33
0.04304	20	-20
0.04308	44.86	-44.86
0.04312	15.32	-15.32
0.04316	42.29	-42.29
0.0432	44.19	-44.19
0.04324	30.47	-30.47
0.04328	25.58	-25.58
0.04332	17.29	-17.29
0.04336	38.5	-38.5
0.0434	35.76	-35.76
0.04344	27.81	-27.81
0.04348	8.415	-8.415
0.04352	29.51	-29.51
0.04356	21.33	-21.33
0.0436	41.51	-41.51
0.04364	31.39	-31.39
0.04368	40.12	-40.12
0.04372	43.7	-43.7
0.04376	41.91	-41.91
0.0438	40.21	-40.21
0.04384	44.83	-44.83
0.04388	47.63	-47.63
0.04392	26.57	-26.57
0.04396	35.81	-35.81
0.044	15.44	-15.44
0.04404	43.59	-43.59
0.04408	35.99	-35.99
0.04412	44.34	-44.34
0.04416	35.55	-35.55
0.0442	19.43	-19.43
0.04424	37.55	-37.55
0.04428	40.09	-40.09
0.04432	32.61	-32.61
0.04436	28.96	-28.96
0.0444	28.53	-28.53
0.04444	45.26	-45.26
0.04448	44.8	-44.8
0.04452	27.66	-27.66
0.04456	33.79	-33.79
0.0446	22.23	-22.23
0.04464	32.87	-32.87
0.04468	29.25	-29.25
0.04472	25.32	-25.32
0.04476	46.82	-46.82
0.0448	83.67	-83.67
0.04484	82.58	-82.58
0.04488	38.88	-38.88
0.04492	64.45	-64.45
0.04496	91.45	-91.45
0.045	114.1	-114.1
0.04504	42.78	-42.78
0.04508	42.66	-42.66
0.04512	68.13	-68.13
0.04516	70.35	-70.35
0.0452	58.04	-58.04
0.04524	30.32	-30.32
0.04528	35.47	-35.47
0.04532	104.5	-104.5
0.04536	79.34	-79.34
0.0454	44.4	-44.4
0.04544	63.18	-63.18
0.04548	72.84	-72.84
0.04552	84.14	-84.14
0.04556	49.17	-49.17
0.0456	45.5	-45.5
0.04564	64.83	-64.83
0.04568	82.14	-82.14
0.04572	78.24	-78.24
0.04576	47.35	-47.35
0.0458	54.95	-54.95
0.04584	75.21	-75.21
0.04588	76.65	-76.65
0.04592	75.23	-75.23
0.04596	51.56	-51.56
0.046	73.47	-73.47
0.04604	76.48	-76.48
0.04608	61.56	-61.56
0.04612	36.39	-36.39
0.04616	47.87	-47.87
0.0462	73.67	-73.67
0.04624	98.99	-98.99
0.04628	86.48	-86.48
0.04632	88.15	-88.15
0.04636	24.86	-24.86
0.0464	51.02	-51.02
0.04644	71.48	-71.48
0.04648	72.52	-72.52
0.04652	94.8	-94.8
0.04656	80.58	-80.58
0.0466	69.48	-69.48
0.04664	45.29	-45.29
0.04668	33.76	-33.76
0.04672	83.33	-83.33
0.04676	72.75	-72.75
0.0468	85.55	-85.55
0.04684	45.38	-45.38
0.04688	28.15	-28.15
0.04692	57.92	-57.92
0.04696	57.92	-57.92
0.047	53.91	-53.91
0.04704	48.65	-48.65
0.04708	78.88	-78.88
0.04712	60.61	-60.61
0.04716	67.43	-67.43
0.0472	58.27	-58.27
0.04724	39.77	-39.77
0.04728	92.37	-92.37
0.04732	77.98	-77.98
0.04736	69.08	-69.08
0.0474	72.95	-72.95
0.04744	37.58	-37.58
0.04748	51.71	-51.71
0.04752	55.67	-55.67
0.04756	82	-82
0.0476	90.58	-90.58
0.04764	54.57	-54.57
0.04768	49.25	-49.25
0.04772	43.3	-43.3
0.04776	48.79	-48.79
0.0478	62.4	-62.4
0.04784	96.3	-96.3
0.04788	52.98	-52.98
0.04792	70.06	-70.06
0.04796	40.21	-40.21
0.048	37.52	-37.52
0.04804	35.81	-35.81
0.04808	52.43	-52.43
0.04812	70.23	-70.23
0.04816	44.02	-44.02
0.0482	56.59	-56.59
0.04824	48.88	-48.88
0.04828	54.98	-54.98
0.04832	43.33	-43.33
0.04836	47.72	-47.72
0.0484	17.78	-17.78
0.04844	24.95	-24.95
0.04848	41.71	-41.71
0.04852	52.4	-52.4
0.04856	46.62	-46.62
0.0486	54.4	-54.4
0.04864	56.13	-56.13
0.04868	37.69	-37.69
0.04872	49.72	-49.72
0.04876	24.37	-24.37
0.0488	40.87	-40.87
0.04884	55.64	-55.64
0.04888	29.66	-29.66
0.04892	39.2	-39.2
0.04896	36.88	-36.88
0.049	33.1	-33.1
0.04904	47	-47
0.04908	44.31	-44.31
0.04912	50.61	-50.61
0.04916	49.17	-49.17
0.0492	39.74	-39.74
0.04924	41.68	-41.68
0.04928	27.52	-27.52
0.04932	38.15	-38.15
0.04936	36.28	-36.28
0.0494	29.37	-29.37
0.04944	35.93	-35.93
0.04948	-226.1m	0.2261
0.04952	51.04	-51.04
0.04956	34.72	-34.72
0.0496	27.89	-27.89
0.04964	46.1	-46.1
0.04968	18.47	-18.47
0.04972	51.82	-51.82
0.04976	27.66	-27.66
0.0498	41.83	-41.83
0.04984	17.03	-17.03
0.04988	42.87	-42.87
0.04992	28.18	-28.18
0.04996	8.155	-8.155
0.05	26.02	-26.02
0.05004	36.07	-36.07
0.05008	37.23	-37.23
0.05012	23.76	-23.76
0.05016	35.09	-35.09
0.0502	51.45	-51.45
0.05024	42.4	-42.4
0.05028	1.855	-1.855
0.05032	39.51	-39.51
0.05036	34.92	-34.92
0.0504	39.89	-39.89
0.05044	14.98	-14.98
0.05048	24.08	-24.08
0.05052	12.09	-12.09
0.05056	12.78	-12.78
0.0506	33.27	-33.27
0.05064	29.57	-29.57
0.05068	36.36	-36.36
0.05072	19.43	-19.43
0.05076	32.14	-32.14
0.0508	27.87	-27.87
0.05084	32.03	-32.03
0.05088	32.87	-32.87
0.05092	22.43	-22.43
0.05096	34.51	-34.51
0.051	21.13	-21.13
0.05104	28.47	-28.47
0.05108	26.39	-26.39
0.05112	19.02	-19.02
0.05116	44.25	-44.25
0.0512	25.38	-25.38
0.05124	31.57	-31.57
0.05128	28.56	-28.56
0.05132	15.03	-15.03
0.05136	24.25	-24.25
0.0514	26.19	-26.19
0.05144	27.81	-27.81
0.05148	13.82	-13.82
0.05152	13.24	-13.24
0.05156	15.47	-15.47
0.0516	20.93	-20.93
0.05164	33.56	-33.56
0.05168	19.05	-19.05
0.05172	28.79	-28.79
0.05176	37.95	-37.95
0.0518	13.47	-13.47
0.05184	13.18	-13.18
0.05188	25.55	-25.55
0.05192	33.96	-33.96
0.05196	23.47	-23.47
0.052	5.785	-5.785
0.05204	8.589	-8.589
0.05208	34.72	-34.72
0.05212	16.77	-16.77
0.05216	16.74	-16.74
0.0522	9.687	-9.687
0.05224	16.19	-16.19
0.05228	34.46	-34.46
0.05232	17.43	-17.43
0.05236	23.79	-23.79
0.0524	1.363	-1.363
0.05244	30.26	-30.26
0.05248	34.57	-34.57
0.05252	10.29	-10.29
0.05256	20.32	-20.32
0.0526	30.58	-30.58
0.05264	13.07	-13.07
0.05268	21.07	-21.07
0.05272	38.36	-38.36
0.05276	18.01	-18.01
0.0528	16.02	-16.02
0.05284	22.03	-22.03
0.05288	31.19	-31.19
0.05292	29.02	-29.02
0.05296	23.79	-23.79
0.053	42.37	-42.37
0.05304	17.63	-17.63
0.05308	21.39	-21.39
0.05312	22.61	-22.61
0.05316	26.19	-26.19
0.0532	35.93	-35.93
0.05324	26.05	-26.05
0.05328	11.31	-11.31
0.05332	19.46	-19.46
0.05336	36.77	-36.77
0.0534	26.94	-26.94
0.05344	22.81	-22.81
0.05348	23.99	-23.99
0.05352	16.13	-16.13
0.05356	35.24	-35.24
0.0536	25.76	-25.76
0.05364	29.77	-29.77
0.05368	30.09	-30.09
0.05372	39.22	-39.22
0.05376	34.46	-34.46
0.0538	31.54	-31.54
0.05384	33.96	-33.96
0.05388	22.61	-22.61
0.05392	14.98	-14.98
0.05396	31.83	-31.83
0.054	18.1	-18.1
0.05404	33.7	-33.7
0.05408	38.62	-38.62
0.05412	12.87	-12.87
0.05416	11.83	-11.83
0.0542	22.03	-22.03
0.05424	34.17	-34.17
0.05428	30.64	-30.64
0.05432	24.66	-24.66
0.05436	36.04	-36.04
0.0544	32.49	-32.49
0.05444	5.872	-5.872
0.05448	21.05	-21.05
0.05452	40	-40
0.05456	46.16	-46.16
0.0546	15.7	-15.7
0.05464	27.63	-27.63
0.05468	28.56	-28.56
0.05472	29.46	-29.46
0.05476	3.762	-3.762
0.0548	13.65	-13.65
0.05484	12.69	-12.69
0.05488	5.121	-5.121
0.05492	-25.08	25.08
0.05496	-29.53	29.53
0.055	-1.874	1.874
0.05504	12.17	-12.17
0.05508	-5.053	5.053
0.05512	-39.39	39.39
0.05516	-11.64	11.64
0.0552	40.61	-40.61
0.05524	26.65	-26.65
0.05528	-19.73	19.73
0.05532	-39.1	39.1
0.05536	-24.53	24.53
0.0554	10.55	-10.55
0.05544	-4.214	4.214
0.05548	901m	-0.901
0.05552	-8.694	8.694
0.05556	6.71	-6.71
0.0556	7.028	-7.028
0.05564	-2.105	2.105
0.05568	-14.73	14.73
0.05572	-22.71	22.71
0.05576	7.606	-7.606
0.0558	7.895	-7.895
0.05584	-833.1m	0.8331
0.05588	-20.31	20.31
0.05592	3.126	-3.126
0.05596	32.63	-32.63
0.056	19.66	-19.66
0.05604	16.07	-16.07
0.05608	11.05	-11.05
0.05612	23.5	-23.5
0.05616	-8.058	8.058
0.0562	7.144	-7.144
0.05624	33.97m	-0.03397
0.05628	30.21	-30.21
0.05632	-1.816	1.816
0.05636	13.01	-13.01
0.0564	17.29	-17.29
0.05644	-2.856	2.856
0.05648	10.53	-10.53
0.05652	-10.57	10.57
0.05656	2.317	-2.317
0.0566	49.34	-49.34
0.05664	42.69	-42.69
0.05668	8.993	-8.993
0.05672	14.51	-14.51
0.05676	29.86	-29.86
0.0568	12.75	-12.75
0.05684	20.61	-20.61
0.05688	2.693	-2.693
0.05692	34.37	-34.37
0.05696	36.54	-36.54
0.057	-12.6	12.6
0.05704	11.59	-11.59
0.05708	-6.006	6.006
0.05712	23.15	-23.15
0.05716	23.65	-23.65
0.0572	10.5	-10.5
0.05724	3.387	-3.387
0.05728	13.91	-13.91
0.05732	1.421	-1.421
0.05736	15.55	-15.55
0.0574	6.941	-6.941
0.05744	39.77	-39.77
0.05748	19.34	-19.34
0.05752	6.19	-6.19
0.05756	16.42	-16.42
0.0576	-20.31	20.31
0.05764	2.953	-2.953
0.05768	11.59	-11.59
0.05772	36.85	-36.85
0.05776	30.9	-30.9
0.0578	33.7	-33.7
0.05784	25.73	-25.73
0.05788	-52.73m	0.05273
0.05792	7.577	-7.577
0.05796	29.72	-29.72
0.058	45.52	-45.52
0.05804	8.415	-8.415
0.05808	351.9m	-0.3519
0.05812	7.086	-7.086
0.05816	11.36	-11.36
0.0582	12.26	-12.26
0.05824	26.48	-26.48
0.05828	8.878	-8.878
0.05832	32	-32
0.05836	40.24	-40.24
0.0584	30	-30
0.05844	29.54	-29.54
0.05848	51.1	-51.1
0.05852	34.4	-34.4
0.05856	13.21	-13.21
0.0586	32.52	-32.52
0.05864	19.98	-19.98
0.05868	27.03	-27.03
0.05872	18.15	-18.15
0.05876	29.89	-29.89
0.0588	25.9	-25.9
0.05884	16.85	-16.85
0.05888	34.51	-34.51
0.05892	18.42	-18.42
0.05896	33.04	-33.04
0.059	17.69	-17.69
0.05904	32.95	-32.95
0.05908	36.85	-36.85
0.05912	24.17	-24.17
0.05916	45.96	-45.96
0.0592	19.66	-19.66
0.05924	29.69	-29.69
0.05928	45.76	-45.76
0.05932	28.18	-28.18
0.05936	31.97	-31.97
0.0594	23.07	-23.07
0.05944	44.08	-44.08
0.05948	37.63	-37.63
0.05952	32.63	-32.63
0.05956	32.66	-32.66
0.0596	29.63	-29.63
0.05964	21.39	-21.39
0.05968	26.02	-26.02
0.05972	35.52	-35.52
0.05976	28.44	-28.44
0.0598	21.94	-21.94
0.05984	28.13	-28.13
0.05988	29.77	-29.77
0.05992	46.02	-46.02
0.05996	41.62	-41.62
0.06	30.38	-30.38
0.06004	16.85	-16.85
0.06008	56.33	-56.33
0.06012	35.78	-35.78
0.06016	23.18	-23.18
0.0602	29.57	-29.57
0.06024	12.37	-12.37
0.06028	31.31	-31.31
0.06032	48.56	-48.56
0.06036	7.144	-7.144
0.0604	34.17	-34.17
0.06044	9.456	-9.456
0.06048	65.9	-65.9
0.06052	59.34	-59.34
0.06056	22.98	-22.98
0.0606	31.59	-31.59
0.06064	48.82	-48.82
0.06068	44.31	-44.31
0.06072	24.28	-24.28
0.06076	28.39	-28.39
0.0608	38.21	-38.21
0.06084	48.39	-48.39
0.06088	29.69	-29.69
0.06092	18.27	-18.27
0.06096	36.68	-36.68
0.061	44.11	-44.11
0.06104	39.63	-39.63
0.06108	32.63	-32.63
0.06112	29.11	-29.11
0.06116	22.95	-22.95
0.0612	35.03	-35.03
0.06124	41.56	-41.56
0.06128	18.24	-18.24
0.06132	52.46	-52.46
0.06136	29.43	-29.43
0.0614	30.21	-30.21
0.06144	36.97	-36.97
0.06148	39.31	-39.31
0.06152	37.46	-37.46
0.06156	25.96	-25.96
0.0616	35.87	-35.87
0.06164	34.43	-34.43
0.06168	35.87	-35.87
0.06172	28.59	-28.59
0.06176	34.46	-34.46
0.0618	33.53	-33.53
0.06184	33.44	-33.44
0.06188	24.02	-24.02
0.06192	31.94	-31.94
0.06196	29.25	-29.25
0.062	20.7	-20.7
0.06204	10.06	-10.06
0.06208	40.18	-40.18
0.06212	35.18	-35.18
0.06216	34.34	-34.34
0.0622	28.85	-28.85
0.06224	19.63	-19.63
0.06228	24.83	-24.83
0.06232	14.72	-14.72
0.06236	33.44	-33.44
0.0624	33.01	-33.01
0.06244	33.91	-33.91
0.06248	44.95	-44.95
0.06252	32.37	-32.37
0.06256	27.49	-27.49
0.0626	29.14	-29.14
0.06264	23.18	-23.18
0.06268	26.19	-26.19
0.06272	25.44	-25.44
0.06276	26.28	-26.28
0.0628	27.29	-27.29
0.06284	38.53	-38.53
0.06288	30.67	-30.67
0.06292	27.2	-27.2
0.06296	46.71	-46.71
0.063	34.8	-34.8
0.06304	43.59	-43.59
0.06308	37.87	-37.87
0.06312	25.9	-25.9
0.06316	25.73	-25.73
0.0632	22.52	-22.52
0.06324	29.4	-29.4
0.06328	23.39	-23.39
0.06332	33.79	-33.79
0.06336	33.36	-33.36
0.0634	42.49	-42.49
0.06344	30.61	-30.61
0.06348	24.28	-24.28
0.06352	35.38	-35.38
0.06356	31.16	-31.16
0.0636	32.75	-32.75
0.06364	47.61	-47.61
0.06368	23.07	-23.07
0.06372	25.35	-25.35
0.06376	40.76	-40.76
0.0638	26.07	-26.07
0.06384	43.96	-43.96
0.06388	34.34	-34.34
0.06392	42.58	-42.58
0.06396	42.11	-42.11
0.064	28.1	-28.1
0.06404	27.87	-27.87
0.06408	31.42	-31.42
0.06412	36.94	-36.94
0.06416	40.15	-40.15
0.0642	22.26	-22.26
0.06424	37.35	-37.35
0.06428	24.34	-24.34
0.06432	40.9	-40.9
0.06436	16.83	-16.83
0.0644	37.2	-37.2
0.06444	29.86	-29.86
0.06448	40.64	-40.64
0.06452	47.06	-47.06
0.06456	26.07	-26.07
0.0646	37.09	-37.09
0.06464	45.03	-45.03
0.06468	54.57	-54.57
0.06472	31.39	-31.39
0.06476	36.22	-36.22
0.0648	41.68	-41.68
0.06484	84.48	-84.48
0.06488	112.2	-112.2
0.06492	85.35	-85.35
0.06496	45.5	-45.5
0.065	48.33	-48.33
0.06504	113.3	-113.3
0.06508	113.4	-113.4
0.06512	56.16	-56.16
0.06516	40	-40
0.0652	69.51	-69.51
0.06524	95.29	-95.29
0.06528	94.95	-94.95
0.06532	43.01	-43.01
0.06536	69.54	-69.54
0.0654	74.69	-74.69
0.06544	66.62	-66.62
0.06548	39.2	-39.2
0.06552	56.8	-56.8
0.06556	96.51	-96.51
0.0656	94.54	-94.54
0.06564	47.14	-47.14
0.06568	60.5	-60.5
0.06572	80.58	-80.58
0.06576	86.1	-86.1
0.0658	100.8	-100.8
0.06584	39.66	-39.66
0.06588	36.71	-36.71
0.06592	74.69	-74.69
0.06596	65.55	-65.55
0.066	79.97	-79.97
0.06604	39.46	-39.46
0.06608	71.8	-71.8
0.06612	81.25	-81.25
0.06616	55.09	-55.09
0.0662	90.29	-90.29
0.06624	52.55	-52.55
0.06628	58.91	-58.91
0.06632	51.1	-51.1
0.06636	63.88	-63.88
0.0664	89.05	-89.05
0.06644	58.88	-58.88
0.06648	52.75	-52.75
0.06652	53.04	-53.04
0.06656	77.92	-77.92
0.0666	68.3	-68.3
0.06664	49.95	-49.95
0.06668	49.6	-49.6
0.06672	37.75	-37.75
0.06676	64.08	-64.08
0.0668	66.42	-66.42
0.06684	92.92	-92.92
0.06688	70.03	-70.03
0.06692	33.39	-33.39
0.06696	46.56	-46.56
0.067	53.62	-53.62
0.06704	79.4	-79.4
0.06708	74.51	-74.51
0.06712	67.4	-67.4
0.06716	68.27	-68.27
0.0672	51.48	-51.48
0.06724	33.88	-33.88
0.06728	73.73	-73.73
0.06732	84.77	-84.77
0.06736	67.81	-67.81
0.0674	90.09	-90.09
0.06744	61.97	-61.97
0.06748	82.86	-82.86
0.06752	78.96	-78.96
0.06756	64.92	-64.92
0.0676	64.95	-64.95
0.06764	30.81	-30.81
0.06768	45.55	-45.55
0.06772	47.43	-47.43
0.06776	47.2	-47.2
0.0678	50.09	-50.09
0.06784	55.44	-55.44
0.06788	34.77	-34.77
0.06792	46.07	-46.07
0.06796	56.48	-56.48
0.068	78.88	-78.88
0.06804	49.72	-49.72
0.06808	52.4	-52.4
0.06812	83.44	-83.44
0.06816	45.61	-45.61
0.0682	41.19	-41.19
0.06824	52.37	-52.37
0.06828	49.66	-49.66
0.06832	9.918	-9.918
0.06836	41.94	-41.94
0.0684	29.66	-29.66
0.06844	42.55	-42.55
0.06848	51.1	-51.1
0.06852	41.65	-41.65
0.06856	52.75	-52.75
0.0686	55.09	-55.09
0.06864	57.81	-57.81
0.06868	39.57	-39.57
0.06872	53.21	-53.21
0.06876	35.21	-35.21
0.0688	37.63	-37.63
0.06884	36.57	-36.57
0.06888	38.65	-38.65
0.06892	36.3	-36.3
0.06896	64.14	-64.14
0.069	38.76	-38.76
0.06904	52.23	-52.23
0.06908	25.84	-25.84
0.06912	42.89	-42.89
0.06916	23.39	-23.39
0.0692	34.8	-34.8
0.06924	43.73	-43.73
0.06928	17.81	-17.81
0.06932	66.56	-66.56
0.06936	50.09	-50.09
0.0694	38.62	-38.62
0.06944	33.73	-33.73
0.06948	17.4	-17.4
0.06952	38.88	-38.88
0.06956	17.72	-17.72
0.0696	31.91	-31.91
0.06964	54.45	-54.45
0.06968	11.77	-11.77
0.06972	45.96	-45.96
0.06976	20.38	-20.38
0.0698	40.47	-40.47
0.06984	32.17	-32.17
0.06988	19.22	-19.22
0.06992	29.89	-29.89
0.06996	33.91	-33.91
0.07	42.03	-42.03
0.07004	47.72	-47.72
0.07008	18.62	-18.62
0.07012	7.751	-7.751
0.07016	48.36	-48.36
0.0702	17.49	-17.49
0.07024	14.4	-14.4
0.07028	61.33	-61.33
0.07032	24.48	-24.48
0.07036	35.47	-35.47
0.0704	29.48	-29.48
0.07044	39.34	-39.34
0.07048	23.33	-23.33
0.07052	19.11	-19.11
0.07056	40.78	-40.78
0.0706	24.86	-24.86
0.07064	45.9	-45.9
0.07068	29.77	-29.77
0.07072	9.745	-9.745
0.07076	32.63	-32.63
0.0708	48.5	-48.5
0.07084	19.95	-19.95
0.07088	21.16	-21.16
0.07092	24.77	-24.77
0.07096	32.37	-32.37
0.071	16.31	-16.31
0.07104	5.092	-5.092
0.07108	22.72	-22.72
0.07112	21.88	-21.88
0.07116	10.06	-10.06
0.0712	15.7	-15.7
0.07124	8.704	-8.704
0.07128	15.87	-15.87
0.07132	23.62	-23.62
0.07136	24.31	-24.31
0.0714	11.28	-11.28
0.07144	24.72	-24.72
0.07148	8.358	-8.358
0.07152	27.75	-27.75
0.07156	120.7m	-0.1207
0.0716	23.56	-23.56
0.07164	23.82	-23.82
0.07168	24.8	-24.8
0.07172	17.98	-17.98
0.07176	24.02	-24.02
0.0718	17.78	-17.78
0.07184	29.54	-29.54
0.07188	20.06	-20.06
0.07192	24.8	-24.8
0.07196	29.08	-29.08
0.072	29.54	-29.54
0.07204	22.11	-22.11
0.07208	4.832	-4.832
0.07212	2.895	-2.895
0.07216	22.55	-22.55
0.0722	29.6	-29.6
0.07224	31.39	-31.39
0.07228	34.51	-34.51
0.07232	23.3	-23.3
0.07236	11.13	-11.13
0.0724	22.4	-22.4
0.07244	32.81	-32.81
0.07248	22.32	-22.32
0.07252	19.28	-19.28
0.07256	16.28	-16.28
0.0726	36.07	-36.07
0.07264	13.99	-13.99
0.07268	20.5	-20.5
0.07272	32.09	-32.09
0.07276	6.219	-6.219
0.0728	12.89	-12.89
0.07284	34.98	-34.98
0.07288	27.58	-27.58
0.07292	42.49	-42.49
0.07296	27.11	-27.11
0.073	30.96	-30.96
0.07304	20.24	-20.24
0.07308	20.24	-20.24
0.07312	33.88	-33.88
0.07316	20.15	-20.15
0.0732	7.201	-7.201
0.07324	28.27	-28.27
0.07328	11.91	-11.91
0.07332	19.74	-19.74
0.07336	10.79	-10.79
0.0734	30.7	-30.7
0.07344	26.59	-26.59
0.07348	45.67	-45.67
0.07352	33.94	-33.94
0.07356	26.07	-26.07
0.0736	21.05	-21.05
0.07364	26.22	-26.22
0.07368	20.58	-20.58
0.07372	13.01	-13.01
0.07376	24.37	-24.37
0.0738	15.55	-15.55
0.07384	25	-25
0.07388	28.41	-28.41
0.07392	22.49	-22.49
0.07396	27.37	-27.37
0.074	36.3	-36.3
0.07404	31.42	-31.42
0.07408	30.64	-30.64
0.07412	9.6	-9.6
0.07416	26.68	-26.68
0.0742	26.28	-26.28
0.07424	18.82	-18.82
0.07428	26.85	-26.85
0.07432	26.68	-26.68
0.07436	31.51	-31.51
0.0744	22.23	-22.23
0.07444	24.8	-24.8
0.07448	27.92	-27.92
0.07452	23.94	-23.94
0.07456	11.91	-11.91
0.0746	30.18	-30.18
0.07464	30.87	-30.87
0.07468	33.91	-33.91
0.07472	11.07	-11.07
0.07476	15.35	-15.35
0.0748	42.78	-42.78
0.07484	28.88	-28.88
0.07488	22.14	-22.14
0.07492	-17.36	17.36
0.07496	-25.57	25.57
0.075	16.94	-16.94
0.07504	21.02	-21.02
0.07508	-10.92	10.92
0.07512	-39.44	39.44
0.07516	-34.24	34.24
0.0752	25.21	-25.21
0.07524	14.8	-14.8
0.07528	-23.46	23.46
0.07532	-48.17	48.17
0.07536	-14.3	14.3
0.0754	19.6	-19.6
0.07544	-14.73	14.73
0.07548	-18.64	18.64
0.07552	872.1m	-0.8721
0.07556	698.7m	-0.6987
0.0756	-10.49	10.49
0.07564	-22.39	22.39
0.07568	24.46	-24.46
0.07572	29.46	-29.46
0.07576	-21.67	21.67
0.0758	-3.579	3.579
0.07584	-39.16	39.16
0.07588	13.16	-13.16
0.07592	-544m	0.544
0.07596	13.73	-13.73
0.076	13.04	-13.04
0.07604	30.52	-30.52
0.07608	-15.37	15.37
0.07612	16.62	-16.62
0.07616	-312.8m	0.3128
0.0762	12.52	-12.52
0.07624	34.57	-34.57
0.07628	26.65	-26.65
0.07632	24.83	-24.83
0.07636	12.66	-12.66
0.0764	-6.411	6.411
0.07644	30.73	-30.73
0.07648	21.42	-21.42
0.07652	12.87	-12.87
0.07656	26.16	-26.16
0.0766	-11.01	11.01
0.07664	13.76	-13.76
0.07668	-9.735	9.735
0.07672	32.2	-32.2
0.07676	-1.874	1.874
0.0768	27	-27
0.07684	19.2	-19.2
0.07688	20.7	-20.7
0.07692	178.5m	-0.1785
0.07696	7.173	-7.173
0.077	5.149	-5.149
0.07704	12.78	-12.78
0.07708	15.79	-15.79
0.07712	18.47	-18.47
0.07716	11.59	-11.59
0.0772	26.31	-26.31
0.07724	9.34	-9.34
0.07728	15.38	-15.38
0.07732	20.21	-20.21
0.07736	-10.23	10.23
0.0774	29.17	-29.17
0.07744	-688.6m	0.6886
0.07748	21.13	-21.13
0.07752	5.034	-5.034
0.07756	12.37	-12.37
0.0776	10.81	-10.81
0.07764	13.56	-13.56
0.07768	12.81	-12.81
0.07772	15.61	-15.61
0.07776	45.81	-45.81
0.0778	31.65	-31.65
0.07784	12.26	-12.26
0.07788	16.74	-16.74
0.07792	40.7	-40.7
0.07796	1.941	-1.941
0.078	21.22	-21.22
0.07804	7.924	-7.924
0.07808	30.21	-30.21
0.07812	25.73	-25.73
0.07816	10.67	-10.67
0.0782	31.54	-31.54
0.07824	-3.116	3.116
0.07828	26.42	-26.42
0.07832	23.44	-23.44
0.07836	33.85	-33.85
0.0784	15.55	-15.55
0.07844	35.5	-35.5
0.07848	37.89	-37.89
0.07852	44.92	-44.92
0.07856	26.54	-26.54
0.0786	7.924	-7.924
0.07864	12.35	-12.35
0.07868	35.5	-35.5
0.07872	16.85	-16.85
0.07876	22.4	-22.4
0.0788	37.69	-37.69
0.07884	22.89	-22.89
0.07888	30.35	-30.35
0.07892	4.282	-4.282
0.07896	32.63	-32.63
0.079	31.71	-31.71
0.07904	17.35	-17.35
0.07908	18.68	-18.68
0.07912	23.82	-23.82
0.07916	8.762	-8.762
0.0792	18.24	-18.24
0.07924	30.24	-30.24
0.07928	39.57	-39.57
0.07932	40.44	-40.44
0.07936	31.31	-31.31
0.0794	21.91	-21.91
0.07944	38.59	-38.59
0.07948	38.5	-38.5
0.07952	14.22	-14.22
0.07956	35.99	-35.99
0.0796	27.75	-27.75
0.07964	34.74	-34.74
0.07968	56.82	-56.82
0.07972	12.58	-12.58
0.07976	54.51	-54.51
0.0798	17.95	-17.95
0.07984	34.8	-34.8
0.07988	17.37	-17.37
0.07992	24.14	-24.14
[truncated: 98,001 more rows]

## Sheet: Sheet1
		100	2500
time	data	butfilt1	Stress
0.756	173.5	1335.57	0.534229
0.75604	1006	1351.37	0.540546
0.75608	3598	1366.97	0.546789
0.75612	4696	1382.38	0.55295
0.75616	5988	1397.56	0.559025
0.7562	8529	1412.52	0.565008
0.75624	9109	1427.23	0.570893
0.75628	10170	1441.69	0.576677
0.75632	9719	1455.89	0.582358
0.75636	8325	1469.83	0.587934
0.7564	9080	1483.51	0.593405
0.75644	7531	1496.93	0.598773
0.75648	6081	1510.1	0.60404
0.75652	5835	1523.02	0.609209
0.75656	3686	1535.71	0.614284
0.7566	2839	1548.17	0.61927
0.75664	2243	1560.43	0.624172
0.75668	711.8	1572.49	0.628995
0.75672	596.5	1584.36	0.633745
0.75676	550.7	1596.07	0.638427
0.7568	24.01	1607.61	0.643046
0.75684	248.2	1619.02	0.647607
0.75688	447.6	1630.29	0.652115
0.75692	4.532	1641.43	0.656574
0.75696	262.9	1652.47	0.660989
0.757	449.8	1663.41	0.665363
0.75704	444.5	1674.25	0.669702
0.75708	849	1685.02	0.674007
0.75712	646.5	1695.71	0.678284
0.75716	749.6	1706.34	0.682534
0.7572	695.5	1716.91	0.686762
0.75724	201.1	1727.43	0.69097
0.75728	-97.66	1737.9	0.695162
0.75732	-260.3	1748.35	0.699339
0.75736	-321.2	1758.76	0.703504
0.7574	-221.2	1769.15	0.707659
0.75744	-163.8	1779.51	0.711806
0.75748	-40.44	1789.86	0.715946
0.75752	-24.6	1800.2	0.72008
0.75756	429.5	1810.52	0.724209
0.7576	977.8	1820.83	0.728333
0.75764	1004	1831.13	0.732453
0.75768	1063	1841.42	0.736568
0.75772	1213	1851.7	0.740679
0.75776	942.3	1861.96	0.744786
0.7578	583.4	1872.22	0.748888
0.75784	420.5	1882.46	0.752984
0.75788	66.47	1892.69	0.757075
0.75792	501.7	1902.9	0.761159
0.75796	3044	1913.09	0.765236
0.758	3488	1923.26	0.769303
0.75804	3828	1933.4	0.77336
0.75808	5448	1943.52	0.777407
0.75812	5794	1953.6	0.781441
0.75816	5960	1963.66	0.785465
0.7582	5883	1973.69	0.789477
0.75824	5188	1983.7	0.793479
0.75828	4937	1993.68	0.797473
0.75832	4164	2003.65	0.801462
0.75836	3166	2013.62	0.805447
0.7584	2234	2023.58	0.809432
0.75844	708.3	2033.55	0.813421
0.75848	15.95	2043.54	0.817416
0.75852	-71.02	2053.55	0.821421
0.75856	-92.95	2063.59	0.825438
0.7586	-376.5	2073.67	0.82947
0.75864	-139.5	2083.8	0.833518
0.75868	710.1	2093.96	0.837586
0.75872	242.3	2104.18	0.841673
0.75876	222.5	2114.45	0.845782
0.7588	1707	2124.78	0.849913
0.75884	1938	2135.17	0.854067
0.75888	2435	2145.61	0.858244
0.75892	3732	2156.11	0.862444
0.75896	4135	2166.67	0.86667
0.759	4393	2177.3	0.87092
0.75904	4336	2187.99	0.875197
0.75908	4204	2198.75	0.879502
0.75912	3786	2209.59	0.883836
0.75916	2696	2220.5	0.888202
0.7592	2373	2231.5	0.892601
0.75924	1991	2242.59	0.897037
0.75928	1175	2253.78	0.901511
0.75932	844.9	2265.07	0.906027
0.75936	416	2276.46	0.910585
0.7594	-108.4	2287.97	0.915189
0.75944	-305.3	2299.6	0.91984
0.75948	-260	2311.35	0.924538
0.75952	-247.3	2323.22	0.929286
0.75956	173.3	2335.21	0.934084
0.7596	711.1	2347.33	0.938931
0.75964	868.8	2359.57	0.943827
0.75968	1311	2371.93	0.948773
0.75972	2179	2384.42	0.953766
0.75976	2914	2397.02	0.958807
0.7598	3637	2409.74	0.963895
0.75984	4498	2422.57	0.969028
0.75988	5166	2435.52	0.974206
0.75992	5361	2448.57	0.979429
0.75996	5216	2461.74	0.984697
0.76	5013	2475.03	0.99001
0.76004	4460	2488.43	0.99537
0.76008	3729	2501.94	1.00078
0.76012	3363	2515.59	1.00623
0.76016	3010	2529.36	1.01174
0.7602	2412	2543.26	1.0173
0.76024	1758	2557.3	1.02292
0.76028	1389	2571.48	1.02859
0.76032	878.9	2585.82	1.03433
0.76036	621.4	2600.3	1.04012
0.7604	727	2614.95	1.04598
0.76044	779.3	2629.75	1.0519
0.76048	934	2644.71	1.05788
0.76052	1032	2659.84	1.06394
0.76056	1243	2675.13	1.07005
0.7606	1597	2690.58	1.07623
0.76064	1871	2706.2	1.08248
0.76068	2294	2721.99	1.08879
0.76072	2829	2737.93	1.09517
0.76076	3218	2754.03	1.10161
0.7608	3500	2770.3	1.10812
0.76084	3777	2786.72	1.11469
0.76088	3867	2803.3	1.12132
0.76092	3814	2820.04	1.12802
0.76096	3804	2836.93	1.13477
0.761	3652	2853.98	1.14159
0.76104	3196	2871.19	1.14848
0.76108	2803	2888.56	1.15543
0.76112	2495	2906.09	1.16244
0.76116	2076	2923.79	1.16951
0.7612	1659	2941.64	1.17666
0.76124	1537	2959.66	1.18386
0.76128	1713	2977.84	1.19114
0.76132	1821	2996.18	1.19847
0.76136	1929	3014.69	1.20587
0.7614	2097	3033.35	1.21334
0.76144	2394	3052.18	1.22087
0.76148	2729	3071.16	1.22846
0.76152	3092	3090.29	1.23612
0.76156	3378	3109.58	1.24383
0.7616	3619	3129.02	1.25161
0.76164	3870	3148.6	1.25944
0.76168	4193	3168.33	1.26733
0.76172	4409	3188.2	1.27528
0.76176	4415	3208.21	1.28328
0.7618	4428	3228.36	1.29134
0.76184	4371	3248.65	1.29946
0.76188	4022	3269.08	1.30763
0.76192	3490	3289.65	1.31586
0.76196	2994	3310.36	1.32414
0.762	2669	3331.21	1.33248
0.76204	2519	3352.2	1.34088
0.76208	2425	3373.33	1.34933
0.76212	2438	3394.6	1.35784
0.76216	2473	3416.02	1.36641
0.7622	2566	3437.57	1.37503
0.76224	2714	3459.27	1.38371
0.76228	2870	3481.1	1.39244
0.76232	3180	3503.06	1.40123
0.76236	3551	3525.16	1.41007
0.7624	3857	3547.4	1.41896
0.76244	4036	3569.76	1.4279
0.76248	4209	3592.24	1.4369
0.76252	4230	3614.86	1.44594
0.76256	4198	3637.6	1.45504
0.7626	4140	3660.46	1.46418
0.76264	4020	3683.44	1.47338
0.76268	3858	3706.54	1.48262
0.76272	3615	3729.76	1.4919
0.76276	3343	3753.1	1.50124
0.7628	3034	3776.56	1.51062
0.76284	2780	3800.14	1.52005
0.76288	2541	3823.83	1.52953
0.76292	2329	3847.63	1.53905
0.76296	2149	3871.55	1.54862
0.763	2103	3895.57	1.55823
0.76304	2137	3919.7	1.56788
0.76308	2322	3943.93	1.57757
0.76312	2604	3968.26	1.5873
0.76316	3134	3992.67	1.59707
0.7632	3783	4017.18	1.60687
0.76324	4451	4041.76	1.6167
0.76328	5002	4066.41	1.62656
0.76332	5509	4091.13	1.63645
0.76336	5818	4115.9	1.64636
0.7634	5983	4140.73	1.65629
0.76344	6078	4165.62	1.66625
0.76348	5997	4190.54	1.67622
0.76352	5768	4215.51	1.6862
0.76356	5401	4240.52	1.69621
0.7636	4903	4265.57	1.70623
0.76364	4379	4290.65	1.71626
0.76368	3917	4315.77	1.72631
0.76372	3520	4340.92	1.73637
0.76376	3202	4366.1	1.74644
0.7638	3050	4391.31	1.75653
0.76384	3005	4416.56	1.76662
0.76388	3006	4441.82	1.77673
0.76392	3135	4467.11	1.78685
0.76396	3353	4492.42	1.79697
0.764	3630	4517.74	1.8071
0.76404	3955	4543.08	1.81723
0.76408	4347	4568.41	1.82737
0.76412	4663	4593.75	1.8375
0.76416	4982	4619.08	1.84763
0.7642	5269	4644.4	1.85776
0.76424	5395	4669.7	1.86788
0.76428	5395	4694.98	1.87799
0.76432	5245	4720.24	1.88809
0.76436	4966	4745.46	1.89818
0.7644	4536	4770.65	1.90826
0.76444	4065	4795.8	1.91832
0.76448	3639	4820.9	1.92836
0.76452	3292	4845.95	1.93838
0.76456	3053	4870.96	1.94838
0.7646	2941	4895.9	1.95836
0.76464	2930	4920.78	1.96831
0.76468	3009	4945.58	1.97823
0.76472	3260	4970.3	1.98812
0.76476	3735	4994.94	1.99798
0.7648	4377	5019.47	2.00779
0.76484	5001	5043.9	2.01756
0.76488	5516	5068.21	2.02728
0.76492	5973	5092.39	2.03695
0.76496	6360	5116.43	2.04657
0.765	6681	5140.32	2.05613
0.76504	6925	5164.06	2.06562
0.76508	6989	5187.62	2.07505
0.76512	6965	5211.02	2.08441
0.76516	6920	5234.24	2.09369
0.7652	6672	5257.26	2.10291
0.76524	6262	5280.1	2.11204
0.76528	5814	5302.74	2.12109
0.76532	5394	5325.17	2.13007
0.76536	5037	5347.4	2.13896
0.7654	4713	5369.41	2.14776
0.76544	4489	5391.21	2.15648
0.76548	4439	5412.78	2.16511
0.76552	4443	5434.13	2.17365
0.76556	4465	5455.24	2.1821
0.7656	4597	5476.12	2.19045
0.76564	4857	5496.75	2.1987
0.76568	5160	5517.13	2.20685
0.76572	5471	5537.24	2.2149
0.76576	5780	5557.1	2.22284
0.7658	6084	5576.67	2.23067
0.76584	6260	5595.97	2.23839
0.76588	6269	5614.98	2.24599
0.76592	6191	5633.69	2.25348
0.76596	6038	5652.11	2.26084
0.766	5903	5670.21	2.26808
0.76604	5634	5688	2.2752
0.76608	5360	5705.48	2.28219
0.76612	5101	5722.63	2.28905
0.76616	4915	5739.44	2.29578
0.7662	4792	5755.92	2.30237
0.76624	4715	5772.06	2.30882
0.76628	4722	5787.84	2.31514
0.76632	4790	5803.26	2.3213
0.76636	4999	5818.32	2.32733
0.7664	5256	5833	2.3332
0.76644	5506	5847.29	2.33892
0.76648	5817	5861.19	2.34448
0.76652	6172	5874.7	2.34988
0.76656	6485	5887.79	2.35511
0.7666	6761	5900.46	2.36018
0.76664	7026	5912.7	2.36508
0.76668	7226	5924.5	2.3698
0.76672	7328	5935.86	2.37434
0.76676	7306	5946.77	2.37871
0.7668	7215	5957.22	2.38289
0.76684	7021	5967.2	2.38688
0.76688	6783	5976.72	2.39069
0.76692	6482	5985.75	2.3943
0.76696	6200	5994.31	2.39772
0.767	5875	6002.38	2.40095
0.76704	5603	6009.95	2.40398
0.76708	5376	6017.03	2.40681
0.76712	5294	6023.61	2.40945
0.76716	5295	6029.69	2.41188
0.7672	5430	6035.25	2.4141
0.76724	5626	6040.29	2.41612
0.76728	5849	6044.81	2.41793
0.76732	6129	6048.8	2.41952
0.76736	6426	6052.26	2.4209
0.7674	6718	6055.17	2.42207
0.76744	6979	6057.53	2.42301
0.76748	7217	6059.34	2.42374
0.76752	7392	6060.59	2.42424
0.76756	7521	6061.28	2.42451
0.7676	7542	6061.39	2.42456
0.76764	7500	6060.93	2.42437
0.76768	7414	6059.9	2.42396
0.76772	7277	6058.29	2.42331
0.76776	7081	6056.09	2.42244
0.7678	6842	6053.31	2.42133
0.76784	6613	6049.95	2.41998
0.76788	6362	6046	2.4184
0.76792	6227	6041.47	2.41659
0.76796	6016	6036.35	2.41454
0.768	5919	6030.64	2.41226
0.76804	5874	6024.34	2.40974
0.76808	5894	6017.45	2.40698
0.76812	5953	6009.98	2.40399
0.76816	6067	6001.91	2.40076
0.7682	6227	5993.25	2.3973
0.76824	6367	5984	2.3936
0.76828	6481	5974.16	2.38966
0.76832	6590	5963.73	2.38549
0.76836	6626	5952.7	2.38108
0.7684	6640	5941.08	2.37643
0.76844	6624	5928.86	2.37155
0.76848	6608	5916.06	2.36642
0.76852	6536	5902.66	2.36106
0.76856	6419	5888.67	2.35547
0.7686	6326	5874.09	2.34964
0.76864	6263	5858.93	2.34357
0.76868	6292	5843.17	2.33727
0.76872	6339	5826.84	2.33074
0.76876	6416	5809.92	2.32397
0.7688	6507	5792.42	2.31697
0.76884	6513	5774.35	2.30974
0.76888	6581	5755.7	2.30228
0.76892	6634	5736.47	2.29459
0.76896	6708	5716.69	2.28667
0.769	6808	5696.33	2.27853
0.76904	6864	5675.42	2.27017
0.76908	6924	5653.95	2.26158
0.76912	6939	5631.93	2.25277
0.76916	6885	5609.36	2.24375
0.7692	6814	5586.26	2.2345
0.76924	6695	5562.63	2.22505
0.76928	6588	5538.46	2.21539
0.76932	6508	5513.79	2.20551
0.76936	6358	5488.6	2.19544
0.7694	6192	5462.91	2.18516
0.76944	5975	5436.73	2.17469
0.76948	5756	5410.07	2.16403
0.76952	5578	5382.93	2.15317
0.76956	5418	5355.32	2.14213
0.7696	5322	5327.26	2.13091
0.76964	5282	5298.76	2.1195
0.76968	5258	5269.82	2.10793
0.76972	5259	5240.45	2.09618
0.76976	5281	5210.66	2.08426
0.7698	5229	5180.46	2.07219
0.76984	5229	5149.87	2.05995
0.76988	5257	5118.89	2.04755
0.76992	5273	5087.52	2.03501
0.76996	5290	5055.79	2.02232
0.77	5346	5023.7	2.00948
0.77004	5328	4991.25	1.9965
0.77008	5303	4958.47	1.98339
0.77012	5234	4925.35	1.97014
0.77016	5237	4891.91	1.95676
0.7702	5249	4858.17	1.94327
0.77024	5275	4824.12	1.92965
0.77028	5330	4789.78	1.91591
0.77032	5345	4755.17	1.90207
0.77036	5285	4720.28	1.88811
0.7704	5195	4685.15	1.87406
0.77044	5069	4649.76	1.8599
0.77048	4907	4614.14	1.84566
0.77052	4763	4578.3	1.83132
0.77056	4654	4542.26	1.8169
0.7706	4559	4506.01	1.8024
0.77064	4454	4469.58	1.78783
0.77068	4315	4432.97	1.77319
0.77072	4182	4396.21	1.75848
0.77076	4027	4359.29	1.74372
0.7708	3976	4322.23	1.72889
0.77084	3897	4285.05	1.71402
0.77088	3827	4247.76	1.6991
0.77092	3766	4210.36	1.68414
0.77096	3732	4172.87	1.66915
0.771	3730	4135.3	1.65412
0.77104	3740	4097.67	1.63907
0.77108	3758	4059.97	1.62399
0.77112	3786	4022.22	1.60889
0.77116	3788	3984.44	1.59378
0.7712	3790	3946.63	1.57865
0.77124	3761	3908.81	1.56352
0.77128	3722	3870.98	1.54839
0.77132	3682	3833.15	1.53326
0.77136	3567	3795.33	1.51813
0.7714	3461	3757.55	1.50302
0.77144	3327	3719.79	1.48792
0.77148	3196	3682.08	1.47283
0.77152	3063	3644.43	1.45777
0.77156	2994	3606.83	1.44273
0.7716	2917	3569.31	1.42773
0.77164	2887	3531.88	1.41275
0.77168	2890	3494.53	1.39781
0.77172	2930	3457.28	1.38291
0.77176	2932	3420.15	1.36806
0.7718	2964	3383.12	1.35325
0.77184	2967	3346.22	1.33849
0.77188	2981	3309.46	1.32378
0.77192	2958	3272.83	1.30913
0.77196	2983	3236.35	1.29454
0.772	2986	3200.02	1.28001
0.77204	2948	3163.86	1.26554
0.77208	2880	3127.86	1.25114
0.77212	2774	3092.04	1.23681
0.77216	2675	3056.4	1.22256
0.7722	2542	3020.95	1.20838
0.77224	2439	2985.7	1.19428
0.77228	2341	2950.65	1.18026
0.77232	2254	2915.81	1.16632
0.77236	2161	2881.18	1.15247
0.7724	2051	2846.77	1.13871
0.77244	1913	2812.59	1.12504
0.77248	1793	2778.65	1.11146
0.77252	1721	2744.94	1.09797
0.77256	1696	2711.47	1.08459
0.7726	1740	2678.24	1.0713
0.77264	1863	2645.26	1.0581
0.77268	1971	2612.54	1.04501
0.77272	2129	2580.06	1.03203
0.77276	2259	2547.85	1.01914
0.7728	2362	2515.89	1.00636
0.77284	2455	2484.2	0.993681
0.77288	2523	2452.77	0.98111
0.77292	2583	2421.61	0.968646
0.77296	2605	2390.72	0.956289
0.773	2587	2360.1	0.944041
0.77304	2544	2329.76	0.931902
0.77308	2449	2299.69	0.919875
0.77312	2330	2269.9	0.907959
0.77316	2177	2240.39	0.896155
0.7732	1975	2211.17	0.884466
0.77324	1811	2182.23	0.872892
0.77328	1640	2153.58	0.861433
0.77332	1470	2125.23	0.850092
0.77336	1360	2097.17	0.838869
0.7734	1280	2069.41	0.827764
0.77344	1185	2041.95	0.816779
0.77348	1134	2014.78	0.805913
0.77352	1093	1987.92	0.795168
0.77356	1127	1961.36	0.784543
0.7736	1200	1935.1	0.77404
0.77364	1315	1909.14	0.763657
0.77368	1435	1883.49	0.753394
0.77372	1561	1858.13	0.743252
0.77376	1673	1833.08	0.733231
0.7738	1757	1808.32	0.723329
0.77384	1820	1783.87	0.713547
0.77388	1845	1759.71	0.703884
0.77392	1869	1735.85	0.69434
0.77396	1833	1712.29	0.684914
0.774	1767	1689.02	0.675607
0.77404	1690	1666.04	0.666417
0.77408	1569	1643.36	0.657345
0.77412	1481	1620.98	0.648391
0.77416	1394	1598.88	0.639553
0.7742	1315	1577.08	0.630832
0.77424	1261	1555.57	0.622228
0.77428	1194	1534.35	0.613739
0.77432	1154	1513.42	0.605366
0.77436	1144	1492.77	0.597108
0.7744	1140	1472.41	0.588965
0.77444	1179	1452.34	0.580935
0.77448	1210	1432.55	0.573019
0.77452	1254	1413.04	0.565215
0.77456	1299	1393.81	0.557522
0.7746	1352	1374.85	0.549941
0.77464	1426	1356.18	0.54247
0.77468	1508	1337.77	0.535109
0.77472	1568	1319.64	0.527856
0.77476	1594	1301.78	0.520711
0.7748	1610	1284.18	0.513673
0.77484	1551	1266.86	0.506742
0.77488	1414	1249.79	0.499917
0.77492	1272	1232.99	0.493198
0.77496	1111	1216.46	0.486583
0.775	957	1200.18	0.480073
0.77504	804	1184.17	0.473666
0.77508	666.2	1168.41	0.467363
0.77512	571.8	1152.9	0.461162
0.77516	512.3	1137.66	0.455063
0.7752	472.2	1122.66	0.449065
0.77524	535.2	1107.92	0.443167
0.77528	590.7	1093.42	0.437368
0.77532	658.8	1079.17	0.431667
0.77536	700.2	1065.16	0.426063
0.7754	732.4	1051.39	0.420554
0.77544	809.3	1037.85	0.41514
0.77548	921	1024.54	0.409818
0.77552	997	1011.47	0.404588
0.77556	1074	998.619	0.399447
0.7756	1208	985.99	0.394396
0.77564	1318	973.579	0.389431
0.77568	1393	961.382	0.384553
0.77572	1358	949.397	0.379759
0.77576	1332	937.62	0.375048
0.7758	1308	926.048	0.370419
0.77584	1209	914.678	0.365871
0.77588	1108	903.508	0.361403
0.77592	905	892.536	0.357014
0.77596	732.6	881.758	0.352703
0.776	651.3	871.172	0.348469
0.77604	574	860.775	0.34431
0.77608	568.4	850.566	0.340226
0.77612	522.8	840.541	0.336216
0.77616	546.5	830.697	0.332279
0.7762	613.7	821.032	0.328413
0.77624	674.1	811.543	0.324617
0.77628	751	802.225	0.32089
0.77632	795	793.077	0.317231
0.77636	866.1	784.094	0.313638
0.7764	932.7	775.275	0.31011
0.77644	949.2	766.614	0.306646
0.77648	921.9	758.111	0.303244
0.77652	896.5	749.76	0.299904
0.77656	824.3	741.56	0.296624
0.7766	761.1	733.507	0.293403
0.77664	682.1	725.598	0.290239
0.77668	648.1	717.831	0.287133
0.77672	649.2	710.203	0.284081
0.77676	633.3	702.711	0.281084
0.7768	648	695.351	0.27814
0.77684	589.4	688.121	0.275248
0.77688	580.9	681.017	0.272407
0.77692	548.8	674.037	0.269615
0.77696	590.3	667.178	0.266871
0.777	643.1	660.437	0.264175
0.77704	704.1	653.809	0.261524
0.77708	786	647.293	0.258917
0.77712	837.9	640.885	0.256354
0.77716	940.9	634.581	0.253833
0.7772	985.1	628.38	0.251352
0.77724	1064	622.278	0.248911
0.77728	1121	616.271	0.246509
0.77732	1147	610.359	0.244144
0.77736	1121	604.538	0.241815
0.7774	1051	598.806	0.239522
0.77744	985.9	593.162	0.237265
0.77748	882.3	587.602	0.235041
0.77752	777.1	582.127	0.232851
0.77756	676.1	576.734	0.230694
0.7776	590.6	571.421	0.228569
0.77764	501.6	566.188	0.226475
0.77768	458.4	561.033	0.224413
0.77772	412.9	555.955	0.222382
0.77776	363.5	550.952	0.220381
0.7778	333.3	546.022	0.218409
0.77784	308.7	541.165	0.216466
0.77788	323.6	536.378	0.214551
0.77792	375.9	531.659	0.212664
0.77796	420.3	527.008	0.210803
0.778	458.3	522.421	0.208968
0.77804	473.2	517.897	0.207159
0.77808	510.2	513.434	0.205374
0.77812	529.7	509.031	0.203612
0.77816	556.1	504.684	0.201874
0.7782	598.3	500.393	0.200157
0.77824	681	496.154	0.198462
0.77828	681.9	491.967	0.196787
0.77832	703.6	487.829	0.195132
0.77836	686.6	483.739	0.193496
0.7784	690.1	479.695	0.191878
0.77844	661	475.695	0.190278
0.77848	632.5	471.737	0.188695
0.77852	651.7	467.822	0.187129
0.77856	643.9	463.946	0.185578
0.7786	652.6	460.109	0.184043
0.77864	647.2	456.309	0.182523
0.77868	633.5	452.545	0.181018
0.77872	615.8	448.817	0.179527
0.77876	603.5	445.123	0.178049
0.7788	615.4	441.462	0.176585
0.77884	601.5	437.833	0.175133
0.77888	588	434.236	0.173694
0.77892	573.9	430.669	0.172268
0.77896	558.9	427.133	0.170853
0.779	549.3	423.626	0.16945
0.77904	516.1	420.148	0.168059
0.77908	529.3	416.698	0.166679
0.77912	484.6	413.277	0.165311
0.77916	516.7	409.882	0.163953
0.7792	511.4	406.515	0.162606
0.77924	484.6	403.174	0.16127
0.77928	487.2	399.859	0.159944
0.77932	491.1	396.571	0.158628
0.77936	500.7	393.308	0.157323
0.7794	482.8	390.071	0.156028
0.77944	442.2	386.859	0.154744
0.77948	454.3	383.672	0.153469
0.77952	391.9	380.51	0.152204
0.77956	360.4	377.373	0.150949
0.7796	328.9	374.261	0.149705
0.77964	320.5	371.174	0.14847
0.77968	362.7	368.111	0.147245
0.77972	381.7	365.073	0.146029
0.77976	423.8	362.059	0.144824
0.7798	455	359.07	0.143628
0.77984	513.4	356.104	0.142442
0.77988	555.4	353.163	0.141265
0.77992	560.2	350.246	0.140098
0.77996	598.5	347.353	0.138941
0.78	565.7	344.484	0.137794
0.78004	619.3	341.64	0.136656
0.78008	582.8	338.821	0.135528
0.78012	527.5	336.027	0.134411
0.78016	485.4	333.259	0.133304
0.7802	429.4	330.517	0.132207
0.78024	379.5	327.803	0.131121
0.78028	347.8	325.117	0.130047
0.78032	270.2	322.46	0.128984
0.78036	213.4	319.832	0.127933
0.7804	170	317.234	0.126894
0.78044	60.51	314.667	0.125867
0.78048	29.71	312.132	0.124853
0.78052	-16.77	309.628	0.123851
0.78056	-41.51	307.157	0.122863
0.7806	-43.47	304.719	0.121888
0.78064	-8.011	302.314	0.120926
0.78068	15.37	299.942	0.119977
0.78072	60.05	297.602	0.119041
0.78076	87.88	295.295	0.118118
0.7808	94.99	293.021	0.117208
0.78084	103.2	290.778	0.116311
0.78088	99.76	288.567	0.115427
0.78092	56.24	286.386	0.114554
0.78096	29.62	284.236	0.113694
0.781	47.97	282.115	0.112846
0.78104	39.99	280.023	0.112009
0.78108	64.65	277.959	0.111184
0.78112	133.3	275.922	0.110369
0.78116	157.7	273.91	0.109564
0.7812	201.4	271.923	0.108769
0.78124	225.4	269.959	0.107984
0.78128	263.6	268.018	0.107207
0.78132	263.4	266.097	0.106439
0.78136	257.6	264.196	0.105678
0.7814	252.2	262.313	0.104925
0.78144	211.6	260.448	0.104179
0.78148	175.6	258.598	0.103439
0.78152	192.3	256.763	0.102705
0.78156	220.7	254.941	0.101977
0.7816	248.3	253.132	0.101253
0.78164	289.4	251.333	0.100533
0.78168	343	249.543	0.0998172
0.78172	471.1	247.761	0.0991046
0.78176	552.1	245.986	0.0983946
0.7818	664.1	244.217	0.0976868
0.78184	738.5	242.452	0.0969809
0.78188	772.7	240.691	0.0962763
0.78192	776	238.932	0.0955729
0.78196	739.1	237.176	0.0948704
0.782	703.7	235.422	0.0941688
0.78204	653.6	233.67	0.0934679
0.78208	589.5	231.92	0.0927679
0.78212	540.1	230.172	0.0920688
0.78216	477.2	228.427	0.0913708
0.7822	446.7	226.685	0.090674
0.78224	401.1	224.947	0.0899788
0.78228	334.6	223.213	0.0892854
0.78232	260.2	221.485	0.0885941
0.78236	193	219.763	0.0879053
0.7824	124.7	218.048	0.0872192
0.78244	87.42	216.341	0.0865363
0.78248	29.19	214.642	0.0858568
0.78252	23.49	212.953	0.085181
0.78256	8.954	211.273	0.0845093
0.7826	21.32	209.604	0.0838417
0.78264	44.01	207.947	0.0831786
0.78268	74.53	206.3	0.0825202
0.78272	108.5	204.666	0.0818664
0.78276	105.7	203.044	0.0812176
0.7828	88.2	201.435	0.0805739
0.78284	91.03	199.838	0.0799352
0.78288	72.16	198.254	0.0793017
0.78292	56.84	196.684	0.0786735
0.78296	26.93	195.127	0.0780506
0.783	1.238	193.583	0.077433
0.78304	-21.02	192.052	0.0768208
0.78308	-12.11	190.534	0.0762138
0.78312	-23.1	189.03	0.075612
0.78316	3.29	187.538	0.0750153
0.7832	28.43	186.059	0.0744236
0.78324	52.6	184.592	0.0738366
0.78328	105.2	183.136	0.0732543
0.78332	117	181.691	0.0726764
0.78336	125.5	180.257	0.0721026
0.7834	132.5	178.832	0.0715328
0.78344	165.5	177.417	0.0709668
0.78348	184.7	176.01	0.0704041
0.78352	179.1	174.612	0.0698447
0.78356	214.6	173.22	0.0692882
0.7836	241.4	171.836	0.0687344
0.78364	244.6	170.458	0.068183
0.78368	274.5	169.085	0.0676339
0.78372	296.2	167.717	0.0670868
0.78376	309	166.354	0.0665415
0.7838	296.6	164.994	0.0659978
0.78384	285.7	163.639	0.0654555
0.78388	246.5	162.286	0.0649146
0.78392	190.5	160.937	0.0643748
0.78396	138.2	159.59	0.0638362
0.784	108.5	158.246	0.0632985
0.78404	88.14	156.904	0.0627616
0.78408	124.6	155.564	0.0622255
0.78412	122	154.225	0.06169
0.78416	102.9	152.888	0.061155
0.7842	114.9	151.551	0.0606204
0.78424	131.2	150.215	0.060086
0.78428	193.7	148.879	0.0595516
0.78432	233.9	147.543	0.0590172
0.78436	244.8	146.206	0.0584825
0.7844	283.6	144.869	0.0579475
0.78444	300.5	143.53	0.057412
0.78448	307.3	142.19	0.056876
0.78452	301.3	140.848	0.0563393
0.78456	275	139.505	0.0558019
0.7846	270	138.16	0.0552639
0.78464	241.8	136.813	0.0547252
0.78468	198.2	135.464	0.0541858
0.78472	173	134.114	0.0536458
0.78476	129	132.763	0.0531052
0.7848	103	131.41	0.0525641
0.78484	108.6	130.056	0.0520225
0.78488	98.49	128.701	0.0514806
0.78492	102.1	127.346	0.0509383
0.78496	93.03	125.989	0.0503957
0.785	93.87	124.632	0.0498528
0.78504	123.6	123.274	0.0493097
0.78508	165.4	121.916	0.0487664
0.78512	174.6	120.557	0.0482229
0.78516	208	119.198	0.0476793
0.7852	306.9	117.839	0.0471356
0.78524	348.8	116.48	0.046592
0.78528	330.6	115.121	0.0460484
0.78532	342.2	113.763	0.045505
0.78536	370.5	112.405	0.0449621
0.7854	335.3	111.049	0.0444197
0.78544	301.7	109.695	0.0438781
0.78548	292.1	108.344	0.0433376
0.78552	249.1	106.996	0.0427986
0.78556	189.5	105.653	0.0422613
0.7856	119.4	104.315	0.041726
0.78564	73.32	102.983	0.0411932
0.78568	62.19	101.658	0.0406633
0.78572	66.41	100.341	0.0401365
0.78576	30.75	99.0334	0.0396134
0.7858	14.82	97.7352	0.0390941
0.78584	-2.606	96.4477	0.0385791
0.78588	-29.37	95.1717	0.0380687
0.78592	-36.1	93.908	0.0375632
0.78596	-74.71	92.6573	0.0370629
0.786	-38.62	91.4203	0.0365681
0.78604	-9.803	90.1977	0.0360791
0.78608	12.02	88.99	0.035596
0.78612	27.88	87.7978	0.0351191
0.78616	19.33	86.6216	0.0346486
0.7862	54.07	85.4618	0.0341847
0.78624	90.11	84.319	0.0337276
0.78628	12.42	83.1935	0.0332774
0.78632	-3.04	82.0859	0.0328344
0.78636	-50.99	80.9965	0.0323986
0.7864	-42.49	79.9256	0.0319702
0.78644	-30.76	78.8737	0.0315495
0.78648	-10.7	77.841	0.0311364
0.78652	-37.43	76.8277	0.0307311
0.78656	-68.15	75.8341	0.0303336
0.7866	-31.25	74.8602	0.0299441
0.78664	-10.79	73.9063	0.0295625
0.78668	6.671	72.9723	0.0291889
0.78672	34.36	72.0583	0.0288233
0.78676	45.57	71.1643	0.0284657
0.7868	1.18	70.2903	0.0281161
0.78684	-23.01	69.4362	0.0277745
0.78688	-28.13	68.602	0.0274408
0.78692	-47.46	67.7875	0.027115
0.78696	-36.94	66.9927	0.0267971
0.787	10.02	66.2173	0.0264869
0.78704	51.03	65.4612	0.0261845
0.78708	79.96	64.7241	0.0258896
0.78712	73.46	64.0058	0.0256023
0.78716	59.68	63.306	0.0253224
0.7872	49.53	62.6245	0.0250498
0.78724	41.79	61.9611	0.0247844
0.78728	52.83	61.3154	0.0245262
0.78732	4.793	60.6873	0.0242749
0.78736	28.23	60.0765	0.0240306
0.7874	6.122	59.4828	0.0237931
0.78744	60.31	58.9057	0.0235623
0.78748	90.25	58.345	0.023338
0.78752	60.14	57.8005	0.0231202
0.78756	58.38	57.2717	0.0229087
0.7876	52.57	56.7585	0.0227034
0.78764	32.68	56.2604	0.0225042
0.78768	50.25	55.7773	0.0223109
0.78772	142.6	55.3088	0.0221235
0.78776	138.1	54.8545	0.0219418
0.7878	148.1	54.4143	0.0217657
0.78784	140.9	53.9879	0.0215951
0.78788	151.4	53.575	0.02143
0.78792	120.8	53.1756	0.0212702
0.78796	106.5	52.7894	0.0211158
0.788	83.78	52.4164	0.0209665
0.78804	74.53	52.0564	0.0208226
0.78808	26.79	51.7095	0.0206838
0.78812	-9.225	51.3755	0.0205502
0.78816	-28.68	51.0543	0.0204217
0.7882	-30.09	50.7459	0.0202984
0.78824	-19.51	50.4501	0.02018
0.78828	19.21	50.1667	0.0200667
0.78832	33.78	49.8957	0.0199583
0.78836	-7.462	49.6367	0.0198547
0.7884	-11.94	49.3896	0.0197558
0.78844	4.59	49.1541	0.0196617
0.78848	-15.93	48.9301	0.019572
0.78852	-7.173	48.7171	0.0194868
0.78856	-13.85	48.5149	0.019406
0.7886	-3.618	48.3233	0.0193293
0.78864	-5.872	48.1417	0.0192567
0.78868	11.99	47.97	0.019188
0.78872	26.32	47.8076	0.0191231
0.78876	11.41	47.6543	0.0190617
0.7888	-8.82	47.5095	0.0190038
0.78884	6.498	47.3729	0.0189492
0.78888	26.35	47.244	0.0188976
0.78892	32.13	47.1224	0.018849
0.78896	27.83	47.0075	0.018803
0.789	36.41	46.8989	0.0187596
0.78904	37.62	46.7962	0.0187185
0.78908	21.41	46.6988	0.0186795
0.78912	38	46.6062	0.0186425
0.78916	34.33	46.5179	0.0186072
0.7892	34.94	46.4335	0.0185734
0.78924	65.17	46.3523	0.0185409
0.78928	47.22	46.274	0.0185096
0.78932	46.55	46.198	0.0184792
0.78936	20.49	46.1237	0.0184495
0.7894	11.73	46.0507	0.0184203
0.78944	11.67	45.9784	0.0183914
0.78948	3.983	45.9064	0.0183625
0.78952	28.98	45.834	0.0183336
0.78956	9.937	45.7607	0.0183043
0.7896	32.19	45.6859	0.0182744
0.78964	35.54	45.6091	0.0182437
0.78968	39.82	45.5297	0.0182119
0.78972	20.6	45.447	0.0181788
0.78976	-5.901	45.3605	0.0181442
0.7898	34.82	45.2696	0.0181078
0.78984	5.92	45.1736	0.0180694
0.78988	-3.04	45.0719	0.0180288
0.78992	-18.99	44.9639	0.0179855
0.78996	2.365	44.8488	0.0179395
0.79	7.134	44.7261	0.0178904
0.79004	16.18	44.5949	0.017838
0.79008	36.99	44.4547	0.0177819
0.79012	50.25	44.3045	0.0177218
0.79016	99.59	44.1438	0.0176575
0.7902	117.1	43.9718	0.0175887
0.79024	143.9	43.7878	0.0175151
0.79028	172	43.591	0.0174364
0.79032	129.3	43.3809	0.0173524
0.79036	138	43.1569	0.0172628
0.7904	154.3	42.9184	0.0171674
0.79044	146.4	42.6649	0.0170659
0.79048	161.8	42.3959	0.0169583
0.79052	143.2	42.1109	0.0168444
0.79056	132	41.8097	0.0167239
0.7906	138.6	41.4918	0.0165967
0.79064	167.9	41.157	0.0164628
0.79068	180.1	40.8049	0.0163219
0.79072	216.4	40.4353	0.0161741
0.79076	232.3	40.0482	0.0160193
0.7908	250.6	39.6433	0.0158573
0.79084	252	39.2208	0.0156883
0.79088	246.1	38.7806	0.0155122
0.79092	213.2	38.3229	0.0153292
0.79096	188.8	37.8479	0.0151392
0.791	178.1	37.356	0.0149424
0.79104	180.5	36.8475	0.014739
0.79108	138.4	36.3227	0.0145291
0.79112	112.1	35.7823	0.0143129
0.79116	95.25	35.2266	0.0140906
0.7912	103.8	34.6563	0.0138625
0.79124	79.33	34.0719	0.0136287
0.79128	77.97	33.474	0.0133896
0.79132	54.16	32.8632	0.0131453
0.79136	37.51	32.2402	0.0128961
0.7914	20.86	31.6055	0.0126422
0.79144	-14.28	30.96	0.012384
0.79148	-22.06	30.304	0.0121216
0.79152	-61.04	29.6384	0.0118554
0.79156	-60.15	28.9637	0.0115855
0.7916	-55.96	28.2805	0.0113122
0.79164	-35.73	27.5892	0.0110357
0.79168	0.6886	26.8904	0.0107562
0.79172	36.67	26.1846	0.0104739
0.79176	8.636	25.4723	0.0101889
0.7918	1.411	24.7538	0.00990153
0.79184	28.72	24.0297	0.0096119
0.79188	79.36	23.3005	0.00932019
0.79192	95.25	22.5665	0.0090266
0.79196	44.1	21.8283	0.00873131
0.792	9.041	21.0863	0.00843452
0.79204	3.608	20.3411	0.00813643
0.79208	-1.97	19.5931	0.00783725
0.79212	-23.79	18.8429	0.00753717
0.79216	-33.33	18.091	0.00723639
0.7922	-14.57	17.3378	0.00693511
0.79224	-0.8432	16.5837	0.0066335
0.79228	10.57	15.8293	0.00633173
0.79232	42.13	15.075	0.00603
0.79236	-1.103	14.3212	0.00572846
0.7924	-4.687	13.5683	0.00542731
0.79244	31.21	12.8167	0.0051267
0.79248	56.41	12.067	0.00482682
0.79252	49.88	11.3196	0.00452784
0.79256	9.099	10.5749	0.00422995
0.7926	11.87	9.8333	0.00393332
0.79264	11.15	9.09539	0.00363815
0.79268	-9.745	8.36159	0.00334463
0.79272	-17.37	7.63237	0.00305295
0.79276	-48.88	6.90819	0.00276328
0.7928	-33.76	6.18952	0.00247581
0.79284	1.209	5.47677	0.00219071
0.79288	-7.23	4.77037	0.00190815
0.79292	0.3995	4.07074	0.0016283
0.79296	11.73	3.37829	0.00135132
0.793	15.2	2.69343	0.00107737
0.79304	16.58	2.01657	0.000806627
0.79308	21.27	1.34812	0.000539249
0.79312	39.3	0.68852	0.000275408
0.79316	19.13	0.0381913	1.52765e-05
0.7932	-17.35	-0.60242	-0.000240968
0.79324	-30.52	-1.23287	-0.000493147
0.79328	-30.99	-1.85271	-0.000741083
0.79332	-38.1	-2.4615	-0.000984602
0.79336	-88.62	-3.05884	-0.00122353
0.7934	-94.8	-3.64431	-0.00145772
0.79344	-74.08	-4.21753	-0.00168701
0.79348	-44.98	-4.77818	-0.00191127
0.79352	9.185	-5.32593	-0.00213037
0.79356	33.87	-5.86048	-0.00234419
0.7936	49.97	-6.38152	-0.00255261
0.79364	31.67	-6.88873	-0.00275549
0.79368	48.2	-7.38177	-0.00295271
0.79372	31.32	-7.86029	-0.00314412
0.79376	-34.86	-8.32393	-0.00332957
0.7938	-53.62	-8.77228	-0.00350891
0.79384	-79.34	-9.20499	-0.00368199
0.79388	-113.2	-9.62168	-0.00384867
0.79392	-144.7	-10.022	-0.00400881
0.79396	-174.5	-10.4058	-0.0041623
0.794	-183	-10.7726	-0.00430905
0.79404	-143.1	-11.1225	-0.00444898
0.79408	-96.62	-11.4551	-0.00458205
0.79412	-45.24	-11.7706	-0.00470824
0.79416	-29.77	-12.0688	-0.00482753
0.7942	-0.09178	-12.3498	-0.00493992
0.79424	-17.52	-12.6135	-0.00504541
0.79428	-62.14	-12.86	-0.00514399
0.79432	-94.08	-13.0892	-0.00523567
0.79436	-83.67	-13.3012	-0.00532046
0.7944	-102.4	-13.496	-0.00539838
0.79444	-165.6	-13.6737	-0.00546947
0.79448	-199	-13.8344	-0.00553376
0.79452	-170	-13.9783	-0.00559133
0.79456	-202.2	-14.1057	-0.00564229
0.7946	-185	-14.2169	-0.00568675
0.79464	-119.7	-14.3122	-0.00572487
0.79468	-54.02	-14.3921	-0.00575683
0.79472	-16.51	-14.457	-0.00578281
0.79476	-25.81	-14.5076	-0.00580303
0.7948	16.21	-14.5442	-0.00581768
0.79484	-6.768	-14.5674	-0.00582697
0.79488	-42.89	-14.5778	-0.00583111
0.79492	-29.02	-14.5757	-0.00583029
0.79496	-26.77	-14.5618	-0.00582471
0.795	-58.7	-14.5365	-0.0058146
0.79504	-65.47	-14.5004	-0.00580016
0.79508	-44.86	-14.454	-0.0057816
0.79512	-12.81	-14.3979	-0.00575915
0.79516	0.2839	-14.3326	-0.00573303
0.7952	9.475	-14.2587	-0.00570348
0.79524	29.39	-14.1768	-0.00567071
0.79528	21.79	-14.0874	-0.00563496
0.79532	-1.681	-13.9911	-0.00559643
0.79536	42.62	-13.8884	-0.00555535
0.7954	81.61	-13.7798	-0.0055119
0.79544	9.966	-13.6658	-0.0054663
0.79548	-3.762	-13.5468	-0.00541873
0.79552	55.08	-13.4234	-0.00536936
0.79556	108.2	-13.296	-0.00531839
0.7956	131.1	-13.1649	-0.00526596
0.79564	125.6	-13.0306	-0.00521223
0.79568	180.2	-12.8933	-0.00515731
0.79572	188.7	-12.7533	-0.00510132
0.79576	193.7	-12.6108	-0.00504432
0.7958	125.9	-12.4659	-0.00498635
0.79584	123.3	-12.3186	-0.00492743
0.79588	119.4	-12.1688	-0.00486753
0.79592	95.74	-12.0166	-0.00480663
0.79596	42.36	-11.8617	-0.00474467
0.796	-23.18	-11.7039	-0.00468157
0.79604	-49.31	-11.5432	-0.00461726
0.79608	-77.86	-11.3792	-0.00455167
0.79612	-78.82	-11.2118	-0.00448471
0.79616	-98.79	-11.0408	-0.00441632
0.7962	-169.7	-10.8661	-0.00434645
0.79624	-138.4	-10.6877	-0.00427507
0.79628	-122.6	-10.5054	-0.00420216
0.79632	-92	-10.3193	-0.00412771
0.79636	-134.1	-10.1294	-0.00405177
0.7964	-146.2	-9.93588	-0.00397435
0.79644	-114.9	-9.73882	-0.00389553
0.79648	-122.2	-9.53843	-0.00381537
0.79652	-99.28	-9.33495	-0.00373398
0.79656	-108.6	-9.12865	-0.00365146
0.7966	-65.84	-8.91986	-0.00356794
0.79664	-22.23	-8.70892	-0.00348357
0.79668	4.561	-8.4962	-0.00339848
0.79672	52.45	-8.28209	-0.00331284
0.79676	59.94	-8.06696	-0.00322679
0.7968	108	-7.85117	-0.00314047
0.79684	88.98	-7.63502	-0.00305401
0.79688	105.4	-7.41882	-0.00296753
0.79692	92.83	-7.2028	-0.00288112
0.79696	12.42	-6.98716	-0.00279487
0.797	-13.13	-6.77209	-0.00270883
0.79704	6.7	-6.55773	-0.00262309
0.79708	0.5151	-6.34423	-0.00253769
0.79712	0.1683	-6.13176	-0.0024527
0.79716	12.8	-5.92045	-0.00236818
0.7972	19.33	-5.71045	-0.00228418
0.79724	-3.415	-5.50189	-0.00220075
0.79728	3.145	-5.2949	-0.00211796
0.79732	5.66	-5.08961	-0.00203584
0.79736	-3.56	-4.88613	-0.00195445
0.7974	4.186	-4.6846	-0.00187384
0.79744	-1.19	-4.48512	-0.00179405
0.79748	-63.13	-4.28781	-0.00171513
0.79752	-39.11	-4.0928	-0.00163712
0.79756	-45.35	-3.90021	-0.00156009
0.7976	10.2	-3.7102	-0.00148408
0.79764	27.1	-3.52293	-0.00140917
0.79768	16.67	-3.33855	-0.00133542
0.79772	46.64	-3.1572	-0.00126288
0.79776	22.13	-2.97904	-0.00119162
0.7978	90.48	-2.80418	-0.00112167
0.79784	45.11	-2.63272	-0.00105309
0.79788	49.21	-2.46475	-0.000985898
0.79792	17.94	-2.30031	-0.000920123
0.79796	23.58	-2.13945	-0.000855779
0.798	-11.28	-1.98219	-0.000792877
0.79804	-29.54	-1.82856	-0.000731424
0.79808	-30.06	-1.67858	-0.000671431
0.79812	-22.49	-1.53228	-0.00061291
0.79816	5.949	-1.38969	-0.000555877
0.7982	7.596	-1.25087	-0.000500349
0.79824	39.16	-1.11587	-0.000446346
0.79828	15.6	-0.984708	-0.000393883
0.79832	41.29	-0.857431	-0.000342972
0.79836	48.38	-0.734052	-0.000293621
0.7984	39.85	-0.614574	-0.000245829
0.79844	5.544	-0.498983	-0.000199593
0.79848	-4.167	-0.387253	-0.000154901
0.79852	4.359	-0.279353	-0.000111741
0.79856	-23.1	-0.17525	-7.01002e-05
0.7986	-31.88	-0.0749146	-2.99658e-05
0.79864	-22.23	0.0216777	8.67109e-06
0.79868	28.84	0.114541	4.58165e-05
0.79872	32.54	0.203688	8.14751e-05
0.79876	16.3	0.289133	0.000115653
0.7988	19.88	0.370904	0.000148361
0.79884	24.19	0.449033	0.000179613
0.79888	13.78	0.523564	0.000209426
0.79892	4.041	0.594547	0.000237819
0.79896	-26.02	0.662036	0.000264815
0.799	2.163	0.726086	0.000290434
0.79904	-7.173	0.786745	0.000314698
0.79908	-25.81	0.844063	0.000337625
0.79912	-22.32	0.898081	0.000359232
0.79916	-16.36	0.948833	0.000379533
0.7992	6.758	0.996346	0.000398538
0.79924	6.266	1.04064	0.000416257
0.79928	23.38	1.08174	0.000432697
0.79932	14.04	1.11967	0.000447868
0.79936	26.01	1.15446	0.000461783
0.7994	7.249	1.18614	0.000474457
0.79944	-1.739	1.21477	0.000485908
0.79948	0.4284	1.24039	0.000496154
0.79952	-17.09	1.26304	0.000505214
0.79956	-25.87	1.28277	0.000513106
0.7996	-10.29	1.29962	0.000519846
0.79964	-18.79	1.31362	0.000525446
0.79968	10.02	1.32479	0.000529916
0.79972	13.9	1.33316	0.000533264
0.79976	17.51	1.33875	0.000535498
0.7998	11.79	1.34157	0.00053663
0.79984	0.1683	1.34168	0.00053667
0.79988	16.32	1.33908	0.000535634
0.79992	11.58	1.33384	0.000533535
0.79996	4.388	1.32598	0.000530391
0.8	-23.56	1.31554	0.000526217
0.80004	-19.83	1.30258	0.000521032
0.80008	-30.44	1.28713	0.00051485
0.80012	3.839	1.26921	0.000507682
0.80016	-17.58	1.24884	0.000499536
0.8002	-1.219	1.22604	0.000490417
0.80024	-9.08	1.20083	0.00048033
0.80028	-2.866	1.1732	0.000469278
0.80032	1.787	1.14316	0.000457263
0.80036	10.72	1.11071	0.000444286
0.8004	9.359	1.07587	0.000430349
0.80044	-23.59	1.03863	0.000415454
0.80048	18.9	0.999007	0.000399603
0.80052	2.885	0.956996	0.000382799
0.80056	-10.81	0.912607	0.000365043
0.8006	-0.4097	0.865844	0.000346338
0.80064	-12.75	0.816713	0.000326685
0.80068	21.35	0.765215	0.000306086
0.80072	-6.103	0.711351	0.00028454
0.80076	-1.855	0.655123	0.000262049
0.8008	2.885	0.596535	0.000238614
0.80084	13.14	0.535589	0.000214236
0.80088	9.648	0.47229	0.000188916
0.80092	-7.144	0.406644	0.000162657
0.80096	0.6019	0.33866	0.000135464
0.801	-13.88	0.268347	0.000107339
0.80104	3.983	0.195712	7.82849e-05
0.80108	11.09	0.120761	4.83043e-05
0.80112	-6.248	0.0434975	1.7399e-05
0.80116	-4.86	-0.0360708	-1.44283e-05
0.8012	29.33	-0.117937	-4.7175e-05
0.80124	44.27	-0.202093	-8.08371e-05
0.80128	64.94	-0.288517	-0.000115407
0.80132	54.53	-0.377174	-0.000150869
0.80136	47.34	-0.468004	-0.000187202
0.8014	3.174	-0.560928	-0.000224371
0.80144	-71.13	-0.655855	-0.000262342
0.80148	-92.17	-0.752694	-0.000301078
0.80152	-108.7	-0.851378	-0.000340551
0.80156	-105.2	-0.95187	-0.000380748
0.8016	-99.43	-1.05418	-0.000421671
0.80164	-39.25	-1.15834	-0.000463337
0.80168	6.238	-1.26444	-0.000505778
0.80172	44.24	-1.37257	-0.000549029
0.80176	65.77	-1.48282	-0.000593128
0.8018	83.58	-1.59526	-0.000638104
0.80184	85.51	-1.70994	-0.000683977
0.80188	51.24	-1.82689	-0.000730757
0.80192	67.05	-1.94609	-0.000778437
0.80196	9.908	-2.06751	-0.000827004
0.802	-29.77	-2.19109	-0.000876435
0.80204	-99.45	-2.31677	-0.000926707
0.80208	-104.9	-2.4445	-0.000977802
0.80212	-89.34	-2.57428	-0.00102971
0.80216	-62.66	-2.70611	-0.00108244
0.8022	-27.43	-2.84005	-0.00113602
0.80224	29.65	-2.97617	-0.00119047
0.80228	63.2	-3.11455	-0.00124582
0.80232	72.45	-3.25527	-0.00130211
0.80236	78.98	-3.39836	-0.00135934
0.8024	57.33	-3.54385	-0.00141754
0.80244	9.157	-3.69174	-0.0014767
0.80248	-24.11	-3.84199	-0.00153679
0.80252	-37.14	-3.99456	-0.00159783
0.80256	-40.21	-4.14944	-0.00165978
0.8026	-51.42	-4.30659	-0.00172264
0.80264	-53.65	-4.46602	-0.00178641
0.80268	-10.55	-4.62773	-0.00185109
0.80272	-0.7565	-4.79175	-0.0019167
0.80276	14.53	-4.95812	-0.00198325
0.8028	31.82	-5.12686	-0.00205074
0.80284	34.91	-5.29799	-0.0021192
0.80288	67.54	-5.47153	-0.00218861
0.80292	66.93	-5.64746	-0.00225898
0.80296	29.99	-5.82575	-0.0023303
0.803	-13.18	-6.00635	-0.00240254
0.80304	-29.25	-6.18917	-0.00247567
0.80308	-45.93	-6.37416	-0.00254966
0.80312	-100.3	-6.56124	-0.0026245
0.80316	-74.34	-6.75039	-0.00270015
0.8032	-41.45	-6.94157	-0.00277663
0.80324	-7.837	-7.1348	-0.00285392
0.80328	3.347	-7.33011	-0.00293204
0.80332	22.1	-7.52751	-0.003011
0.80336	37.65	-7.72703	-0.00309081
0.8034	55.14	-7.92867	-0.00317147
0.80344	41.01	-8.13243	-0.00325297
0.80348	27.22	-8.33828	-0.00333531
0.80352	-17.35	-8.54617	-0.00341847
0.80356	6.7	-8.75604	-0.00350242
0.8036	-14.54	-8.96784	-0.00358713
0.80364	-55.96	-9.18149	-0.00367259
0.80368	-49.11	-9.39693	-0.00375877
0.80372	-43.3	-9.61413	-0.00384565
0.80376	-34.37	-9.83305	-0.00393322
0.8038	-15.29	-10.0537	-0.00402146
0.80384	-13.94	-10.276	-0.00411039
0.80388	1.845	-10.5	-0.00419998
0.80392	11.41	-10.7256	-0.00429024
0.80396	25.46	-10.9529	-0.00438118
0.804	20.77	-11.1819	-0.00447276
0.80404	29.01	-11.4125	-0.004565
0.80408	3.925	-11.6446	-0.00465786
0.80412	13.75	-11.8783	-0.00475132
0.80416	12.68	-12.1134	-0.00484536
0.8042	-16.65	-12.3499	-0.00493995
0.80424	-6.045	-12.5876	-0.00503505
0.80428	6.382	-12.8266	-0.00513062
0.80432	1.845	-13.0666	-0.00522664
0.80436	-6.884	-13.3076	-0.00532306
0.8044	5.573	-13.5496	-0.00541984
0.80444	-14.31	-13.7924	-0.00551695
0.80448	-14.8	-14.0358	-0.00561433
0.80452	3.405	-14.2799	-0.00571194
0.80456	3.954	-14.5244	-0.00580974
0.8046	-6.508	-14.7692	-0.00590768
0.80464	11.99	-15.0143	-0.00600571
0.80468	10.57	-15.2594	-0.00610377
0.80472	11.3	-15.5045	-0.00620181
0.80476	18.55	-15.7494	-0.00629978
0.8048	24.68	-15.994	-0.00639759
0.80484	-7.924	-16.238	-0.00649519
0.80488	4.879	-16.4813	-0.00659251
0.80492	20.69	-16.7236	-0.00668945
0.80496	20.02	-16.9649	-0.00678594
0.805	20.69	-17.2047	-0.0068819
0.80504	25.75	-17.443	-0.00697722
0.80508	8.983	-17.6795	-0.00707181
0.80512	-35.29	-17.9139	-0.00716557
0.80516	-32.95	-18.146	-0.00725839
0.8052	-110.8	-18.3754	-0.00735015
0.80524	-117.8	-18.6019	-0.00744077
0.80528	-26.13	-18.8254	-0.00753015
0.80532	-64.17	-19.0455	-0.00761821
0.80536	-74.86	-19.2622	-0.00770488
0.8054	-17.09	-19.4752	-0.00779009
0.80544	0.4573	-19.6845	-0.00787379
0.80548	-35.15	-19.8898	-0.00795591
0.80552	-23.91	-20.091	-0.00803639
0.80556	-38.47	-20.2879	-0.00811518
0.8056	-21.59	-20.4805	-0.00819222
0.80564	1.064	-20.6686	-0.00826745
0.80568	-46.1	-20.852	-0.00834082
0.80572	-88.85	-21.0307	-0.00841227
0.80576	-63.56	-21.2044	-0.00848175
0.8058	-40.15	-21.373	-0.00854922
0.80584	-37.69	-21.5366	-0.00861464
0.80588	-37.92	-21.6949	-0.00867796
0.80592	-26.33	-21.8479	-0.00873918
0.80596	16.53	-21.9956	-0.00879824
0.806	18.43	-22.1378	-0.00885513
0.80604	-1.219	-22.2745	-0.0089098
0.80608	-9.456	-22.4056	-0.00896223
0.80612	1.642	-22.5309	-0.00901236
0.80616	-26.88	-22.6504	-0.00906015
0.8062	-33.3	-22.7639	-0.00910555
0.80624	-43.1	-22.8713	-0.00914852
0.80628	-23.21	-22.9725	-0.009189
0.80632	-25.67	-23.0674	-0.00922696
0.80636	-47.11	-23.1558	-0.00926234
0.8064	-37.29	-23.2378	-0.00929511
0.80644	-48.76	-23.3131	-0.00932522
0.80648	-33.39	-23.3816	-0.00935265
0.80652	-22.32	-23.4434	-0.00937735
0.80656	-37.75	-23.4982	-0.00939929
0.8066	-36.36	-23.5461	-0.00941844
0.80664	10.14	-23.5869	-0.00943477
0.80668	-42.55	-23.6206	-0.00944825
0.80672	-66.3	-23.6471	-0.00945885
0.80676	-71.82	-23.6664	-0.00946654
0.8068	-41.59	-23.6783	-0.00947131
0.80684	-53.96	-23.6828	-0.00947312
0.80688	-32.23	-23.6799	-0.00947198
0.80692	-24.31	-23.6696	-0.00946786
0.80696	-3.011	-23.6519	-0.00946077
0.807	39.91	-23.6267	-0.00945069
0.80704	-2.202	-23.594	-0.00943761
0.80708	-55.12	-23.5538	-0.00942152
0.80712	-48.85	-23.506	-0.0094024
0.80716	-92.63	-23.4506	-0.00938023
0.8072	-106.6	-23.3875	-0.00935499
0.80724	-54.28	-23.3167	-0.00932668
0.80728	-18.7	-23.2383	-0.00929532
0.80732	-38.07	-23.1523	-0.00926091
0.80736	-35.09	-23.0587	-0.00922346
0.8074	-40.87	-22.9575	-0.00918301
0.80744	-3.415	-22.8489	-0.00913956
0.80748	23.61	-22.7328	-0.00909313
0.80752	-18.01	-22.6093	-0.00904374
0.80756	-32.52	-22.4785	-0.0089914
0.8076	-48.62	-22.3403	-0.00893613
0.80764	-54.48	-22.1949	-0.00887794
0.80768	-52.98	-22.0421	-0.00881684
0.80772	-74.11	-21.8822	-0.00875286
0.80776	-88.1	-21.7151	-0.00868603
0.8078	-55.81	-21.5409	-0.00861637
0.80784	-47.87	-21.3598	-0.00854394
0.80788	-19.51	-21.1719	-0.00846877
0.80792	24.91	-20.9773	-0.00839093
0.80796	-6.623	-20.7762	-0.00831047
0.808	5.977	-20.5686	-0.00822744
0.80804	-36.83	-20.3547	-0.00814187
0.80808	-27.84	-20.1345	-0.00805382
0.80812	-46.25	-19.9083	-0.00796332
0.80816	-60.26	-19.6761	-0.00787042
0.8082	-52.52	-19.438	-0.00777518
0.80824	-48.53	-19.1941	-0.00767764
0.80828	-58.36	-18.9447	-0.00757788
0.80832	-41.02	-18.6899	-0.00747594
0.80836	-14.51	-18.4298	-0.00737191
0.8084	-1.999	-18.1646	-0.00726585
0.80844	20.31	-17.8946	-0.00715785
0.80848	6.353	-17.6199	-0.00704796
0.80852	7.827	-17.3407	-0.00693626
0.80856	14.53	-17.057	-0.00682281
0.8086	4.417	-16.7692	-0.00670767
0.80864	-29.51	-16.4772	-0.00659088
0.80868	-45.55	-16.1813	-0.00647251
0.80872	-71.07	-15.8815	-0.00635261
0.80876	-42.43	-15.5781	-0.00623122
0.8088	-39.11	-15.2711	-0.00610842
0.80884	-8.473	-14.9607	-0.00598428
0.80888	-0.8432	-14.6472	-0.00585887
0.80892	7.596	-14.3306	-0.00573225
0.80896	28.61	-14.0112	-0.0056045
0.809	-4.918	-13.6892	-0.00547568
0.80904	6.411	-13.3646	-0.00534585
0.80908	24.97	-13.0377	-0.00521508
0.80912	1.093	-12.7085	-0.00508341
0.80916	-28.44	-12.3772	-0.0049509
0.8092	-28.73	-12.044	-0.00481759
0.80924	-36.22	-11.7088	-0.00468354
0.80928	-31.48	-11.372	-0.00454879
0.80932	-25.76	-11.0335	-0.00441341
0.80936	-17.61	-10.6936	-0.00427745
0.8094	10.6	-10.3524	-0.00414097
0.80944	24.76	-10.0101	-0.00400404
0.80948	25.69	-9.66676	-0.0038667
0.80952	19.1	-9.32256	-0.00372902
0.80956	17.8	-8.97762	-0.00359105
0.8096	3.839	-8.63205	-0.00345282
0.80964	-29.22	-8.28595	-0.00331438
0.80968	-36.07	-7.93942	-0.00317577
0.80972	-22.52	-7.59256	-0.00303702
0.80976	-14.11	-7.24548	-0.00289819
0.8098	-18.18	-6.8983	-0.00275932
0.80984	11.64	-6.55113	-0.00262045
0.80988	16.44	-6.20412	-0.00248165
0.80992	23.84	-5.85736	-0.00234294
0.80996	40.34	-5.51097	-0.00220439
0.81	20.89	-5.16504	-0.00206601
0.81004	33.98	-4.81965	-0.00192786
0.81008	15.75	-4.47488	-0.00178995
0.81012	-26.25	-4.13078	-0.00165231
0.81016	-28.07	-3.7874	-0.00151496
0.8102	-33.5	-3.4448	-0.00137792
0.81024	-43.67	-3.10304	-0.00124122
0.81028	-28.3	-2.76221	-0.00110488
0.81032	-26.65	-2.42238	-0.000968954
0.81036	10.78	-2.08367	-0.000833469
0.8104	15.34	-1.74618	-0.000698472
0.81044	22.57	-1.41001	-0.000564005
0.81048	47.02	-1.07526	-0.000430106
0.81052	22.13	-0.742029	-0.000296811
0.81056	0.3995	-0.410377	-0.000164151
0.8106	-20.09	-0.0803777	-3.21511e-05
0.81064	-53.53	0.247903	9.91614e-05
0.81068	1.584	0.574392	0.000229757
0.81072	0.6597	0.899004	0.000359602
0.81076	20.11	1.22165	0.00048866
0.8108	36.96	1.54224	0.000616897
0.81084	56.55	1.8607	0.000744281
0.81088	70.43	2.17696	0.000870784
0.81092	56.29	2.49097	0.00099639
0.81096	25.63	2.80272	0.00112109
0.811	34.82	3.11219	0.00124488
0.81104	-7.606	3.41941	0.00136776
0.81108	7.856	3.72437	0.00148975
0.81112	-6.132	4.02711	0.00161085
0.81116	-35.15	4.32765	0.00173106
0.8112	-20.15	4.62598	0.00185039
0.81124	-45.99	4.92212	0.00196885
0.81128	-28.07	5.21606	0.00208642
0.81132	-2.953	5.50775	0.0022031
0.81136	36.47	5.79718	0.00231887
0.8114	29.91	6.08429	0.00243372
0.81144	56.01	6.36905	0.00254762
0.81148	28.43	6.65145	0.00266058
0.81152	38.75	6.93146	0.00277259
0.81156	2.596	7.20911	0.00288364
0.8116	-26.91	7.48439	0.00299375
0.81164	-55.15	7.75731	0.00310292
0.81168	-46.36	8.02788	0.00321115
0.81172	-47.4	8.29606	0.00331842
0.81176	-52.06	8.56181	0.00342473
0.8118	-37.81	8.82507	0.00353003
0.81184	30.08	9.08574	0.0036343
0.81188	21.47	9.34373	0.00373749
0.81192	-17.78	9.59892	0.00383957
0.81196	4.128	9.85122	0.00394049
0.812	2.365	10.1005	0.00404021
0.81204	-61.04	10.3467	0.00413868
0.81208	-34.83	10.5897	0.00423586
0.81212	-6.941	10.8292	0.0043317
0.81216	-29.66	11.0653	0.00442611
0.8122	-2.519	11.2976	0.00451905
0.81224	39.21	11.5261	0.00461044
0.81228	103.8	11.7505	0.0047002
0.81232	120.5	11.9707	0.00478826
0.81236	119.7	12.1865	0.00487459
0.8124	117.8	12.3978	0.00495912
0.81244	98.32	12.6046	0.00504185
0.81248	72.59	12.8069	0.00512276
0.81252	35.02	13.0047	0.00520186
0.81256	12.16	13.1979	0.00527917
0.8126	8.896	13.3867	0.0053547
0.81264	14.21	13.5712	0.00542848
0.81268	-1.566	13.7513	0.00550052
0.81272	-2.404	13.9271	0.00557085
0.81276	54.65	14.0987	0.00563949
0.8128	65.46	14.2661	0.00570644
0.81284	52.45	14.4294	0.00577175
0.81288	20.14	14.5886	0.00583543
0.81292	14.42	14.7438	0.00589752
0.81296	17.8	14.8951	0.00595806
0.813	-0.09178	15.0427	0.00601708
0.81304	9.33	15.1865	0.00607462
0.81308	3.723	15.3268	0.00613071
0.81312	-22.98	15.4635	0.0061854
0.81316	-30.09	15.5968	0.0062387
0.8132	-0.9877	15.7266	0.00629065
0.81324	-27.35	15.8532	0.00634127
0.81328	-14.2	15.9764	0.00639056
0.81332	18.32	16.0964	0.00643855
0.81336	40.05	16.2131	0.00648523
0.8134	58.35	16.3265	0.00653062
0.81344	56.44	16.4368	0.00657472
0.81348	54.88	16.5439	0.00661755
0.81352	29.33	16.6478	0.00665913
0.81356	33.72	16.7487	0.00669949
0.8136	2.394	16.8466	0.00673866
0.81364	23.69	16.9417	0.00677666
0.81368	12.02	17.0338	0.00681354
0.81372	38.17	17.1233	0.00684931
0.81376	19.88	17.21	0.00688401
0.8138	21.67	17.2942	0.00691768
0.81384	45.95	17.3759	0.00695035
0.81388	48.4	17.4551	0.00698206
0.81392	75.63	17.5321	0.00701284
0.81396	29.01	17.6069	0.00704275
0.814	42.91	17.6796	0.00707182
0.81404	12.39	17.7503	0.00710013
0.81408	-38.44	17.8193	0.00712773
0.81412	-65.7	17.8867	0.00715466
0.81416	-49.72	17.9525	0.00718099
0.8142	-1.392	18.0169	0.00720674
0.81424	-15.58	18.0799	0.00723195
0.81428	10.75	18.1416	0.00725664
0.81432	34.5	18.2021	0.00728083
0.81436	30.6	18.2613	0.00730453
0.8144	4.186	18.3194	0.00732776
0.81444	0.2261	18.3764	0.00735055
0.81448	27.57	18.4323	0.00737291
0.81452	4.59	18.4871	0.00739485
0.81456	-10.32	18.541	0.0074164
0.8146	12.86	18.5939	0.00743757
0.81464	-32.46	18.6459	0.00745836
0.81468	-30.18	18.697	0.00747879
0.81472	-29.28	18.7471	0.00749885
0.81476	-12.89	18.7964	0.00751854
0.8148	35.51	18.8446	0.00753785
0.81484	53	18.8919	0.00755676
0.81488	88.87	18.9381	0.00757525
0.81492	42.36	18.9833	0.00759332
0.81496	31.27	19.0274	0.00761096
0.815	-15.84	19.0704	0.00762817
0.81504	-62.87	19.1124	0.00764496
0.81508	-53.82	19.1533	0.00766132
0.81512	-85.41	19.1931	0.00767725
0.81516	-43.91	19.2318	0.0076927
0.8152	-26.13	19.2691	0.00770765
0.81524	21.96	19.3051	0.00772204
0.81528	49.16	19.3396	0.00773583
0.81532	52.39	19.3724	0.00774894
0.81536	51.24	19.4033	0.00776133
0.8154	53.98	19.4324	0.00777296
0.81544	9.417	19.4594	0.00778377
0.81548	-40.64	19.4843	0.00779373
0.81552	101.9	19.507	0.00780279
0.81556	7.885	19.5273	0.00781092
0.8156	-37.09	19.5452	0.00781806
0.81564	-22.78	19.5605	0.00782419
0.81568	-25.55	19.5731	0.00782926
0.81572	-29.43	19.583	0.0078332
0.81576	71.47	19.5899	0.00783597
0.8158	136.1	19.5937	0.00783749
0.81584	67.59	19.5943	0.00783772
0.81588	175.6	19.5915	0.0078366
0.81592	127.8	19.5853	0.00783412
0.81596	22.36	19.5756	0.00783025
0.816	38.06	19.5625	0.00782501
0.81604	4.128	19.546	0.00781839
0.81608	-98.56	19.526	0.00781041
0.81612	-88.53	19.5027	0.00780107
0.81616	-27.75	19.4759	0.00779036
0.8162	-56.16	19.4456	0.00777825
0.81624	33.17	19.4118	0.00776472
0.81628	107.4	19.3743	0.00774971
0.81632	53.4	19.333	0.0077332
0.81636	113.5	19.2879	0.00771515
0.8164	109.7	19.2388	0.00769553
0.81644	14.88	19.1858	0.00767434
0.81648	51.21	19.1289	0.00765157
0.81652	38.38	19.0681	0.00762724
0.81656	-22.75	19.0034	0.00760134
0.8166	-38.79	18.9347	0.00757389
0.81664	-7.173	18.8622	0.0075449
0.81668	-54.37	18.7859	0.00751435
0.81672	-71.28	18.7056	0.00748223
0.81676	46.01	18.6213	0.00744854
0.8168	29.47	18.5331	0.00741323
0.81684	50.02	18.4407	0.00737629
0.81688	145.5	18.3442	0.00733768
0.81692	81.24	18.2435	0.00729739
0.81696	52.05	18.1385	0.00725542
0.817	84.76	18.0294	0.00721175
0.81704	18.58	17.9161	0.00716643
0.81708	-3.82	17.7986	0.00711945
0.81712	23.14	17.6771	0.00707084
0.81716	-34.98	17.5516	0.00702063
0.8172	-52.75	17.4221	0.00696883
0.81724	57.07	17.2886	0.00691546
0.81728	59.39	17.1513	0.00686051
0.81732	31.64	17.01	0.00680401
0.81736	100.6	16.8649	0.00674596
0.8174	96.38	16.716	0.00668639
0.81744	86.06	16.5633	0.00662532
0.81748	156.3	16.407	0.0065628
0.81752	105.2	16.2472	0.00649889
0.81756	53.23	16.0841	0.00643366
0.8176	32.28	15.918	0.0063672
0.81764	-40.96	15.749	0.00629959
0.81768	-119.7	15.5774	0.00623094
0.81772	-36.07	15.4033	0.00616134
0.81776	-61.02	15.2271	0.00609084
0.8178	-60.78	15.0488	0.00601952
0.81784	27.34	14.8685	0.00594742
0.81788	90.2	14.6864	0.00587458
0.81792	60.57	14.5026	0.00580105
0.81796	86.93	14.3172	0.00572687
0.818	93.03	14.1303	0.00565211
0.81804	9.966	13.9421	0.00557683
0.81808	7.712	13.7528	0.00550111
0.81812	-5.612	13.5626	0.00542502
0.81816	-104	13.3717	0.00534866
0.8182	-85.23	13.1802	0.00527209
0.81824	-60.9	12.9884	0.00519536
0.81828	-108.7	12.7963	0.00511852
0.81832	-67.58	12.604	0.0050416
0.81836	18.29	12.4115	0.00496462
0.8184	3.897	12.2189	0.00488757
0.81844	50.69	12.0262	0.00481047
0.81848	132.4	11.8332	0.0047333
0.81852	85.72	11.6402	0.00465608
0.81856	45.46	11.4471	0.00457883
0.8186	67.16	11.2539	0.00450158
0.81864	47.22	11.0609	0.00442437
0.81868	6.729	10.8682	0.00434726
0.81872	64.13	10.6757	0.0042703
0.81876	4.648	10.4838	0.00419353
0.8188	11.73	10.2926	0.00411704
0.81884	16.06	10.1022	0.00404086
0.81888	-52.11	9.9127	0.00396508
0.81892	-113.2	9.72435	0.00388974
0.81896	-4.976	9.53725	0.0038149
0.819	-8.271	9.3515	0.0037406
0.81904	-12.17	9.16717	0.00366687
0.81908	59.07	8.98435	0.00359374
0.81912	58.78	8.80309	0.00352124
0.81916	13.06	8.6235	0.0034494
0.8192	23.23	8.44566	0.00337826
0.81924	25.72	8.26968	0.00330787
0.81928	-43.99	8.09568	0.00323827
0.81932	10.2	7.92376	0.0031695
0.81936	26.67	7.75402	0.00310161
0.8194	-15.81	7.58658	0.00303463
0.81944	27.54	7.42152	0.00296861
0.81948	-14.72	7.25895	0.00290358
0.81952	-50.52	7.09898	0.00283959
0.81956	-35.06	6.94168	0.00277667
0.8196	-15.58	6.78714	0.00271486
0.81964	9.764	6.63541	0.00265417
0.81968	26.58	6.48655	0.00259462
0.81972	46.44	6.34061	0.00253625
0.81976	5.515	6.19765	0.00247906
0.8198	26.53	6.05774	0.00242309
0.81984	-18.79	5.92094	0.00236838
0.81988	-62.26	5.78734	0.00231493
0.81992	-27.35	5.65699	0.0022628
0.81996	22.22	5.52995	0.00221198
0.82	0.05273	5.40625	0.0021625
0.82004	3.665	5.28594	0.00211437
0.82008	49.88	5.16903	0.00206761
0.82012	-2.346	5.05559	0.00202223
0.82016	-15.47	4.94564	0.00197826
0.8202	2.798	4.83924	0.0019357
0.82024	-2.808	4.73643	0.00189457
0.82028	1.729	4.63725	0.0018549
0.82032	37.05	4.54174	0.0018167
0.82036	6.324	4.44993	0.00177997
0.8204	5.024	4.36189	0.00174475
0.82044	-5.525	4.27764	0.00171106
0.82048	-38.7	4.19725	0.0016789
0.82052	-55.58	4.12074	0.0016483
0.82056	-4.571	4.04816	0.00161926
0.8206	24.97	3.9795	0.0015918
0.82064	28.17	3.91479	0.00156591
0.82068	65.17	3.85402	0.00154161
0.82072	56.73	3.79723	0.00151889
0.82076	27.51	3.74446	0.00149778
0.8208	13.75	3.69577	0.00147831
0.82084	-22.11	3.65123	0.00146049
0.82088	-30.03	3.61091	0.00144437
0.82092	2.134	3.57489	0.00142996
0.82096	-2.664	3.54321	0.00141729
0.821	-4.832	3.51595	0.00140638
0.82104	-1.797	3.49313	0.00139725
0.82108	-20.52	3.47483	0.00138993
0.82112	-43.15	3.46107	0.00138443
0.82116	-8.849	3.4519	0.00138076
0.8212	27.25	3.44733	0.00137893
0.82124	7.798	3.44739	0.00137896
0.82128	13.55	3.4521	0.00138084
0.82132	-28.73	3.46148	0.00138459
0.82136	-85.06	3.47555	0.00139022
0.8214	-3.878	3.49432	0.00139773
0.82144	-109.4	3.51778	0.00140711
0.82148	-196.7	3.5459	0.00141836
0.82152	73.4	3.57859	0.00143144
0.82156	99.33	3.61575	0.0014463
0.8216	-140.9	3.65726	0.00146291
0.82164	73	3.70302	0.00148121
0.82168	91.81	3.7529	0.00150116
0.82172	-119.3	3.8068	0.00152272
0.82176	-22.66	3.86462	0.00154585
0.8218	32.28	3.92624	0.0015705
0.82184	-193.9	3.99153	0.00159661
0.82188	-80.9	4.06034	0.00162414
0.82192	-18.85	4.13247	0.00165299
0.82196	-249	4.2077	0.00168308
0.822	-172.7	4.28574	0.0017143
0.82204	-30.32	4.36627	0.00174651
0.82208	-135.3	4.44887	0.00177955
0.82212	-71.25	4.53311	0.00181324
0.82216	24.27	4.61851	0.00184741
0.8222	-49.02	4.70457	0.00188183
0.82224	-18.36	4.79076	0.00191631
0.82228	-34.63	4.87657	0.00195063
0.82232	-70.26	4.96144	0.00198457
0.82236	-3.358	5.04481	0.00201792
0.8224	9.561	5.12611	0.00205044
0.82244	-12.4	5.20475	0.0020819
0.82248	54.94	5.28014	0.00211205
0.82252	68.35	5.35169	0.00214068
0.82256	80.66	5.41884	0.00216753
0.8226	108.2	5.48103	0.00219241
0.82264	115.2	5.53775	0.0022151
0.82268	132.8	5.58853	0.00223541
0.82272	138.6	5.63293	0.00225317
0.82276	87.13	5.67056	0.00226822
0.8228	98.55	5.70108	0.00228043
0.82284	91.87	5.72421	0.00228968
0.82288	50.8	5.73967	0.00229587
0.82292	55.23	5.74723	0.00229889
0.82296	99.47	5.74668	0.00229867
0.823	76.64	5.73783	0.00229513
0.82304	82.25	5.72054	0.00228822
0.82308	99.99	5.69468	0.00227787
0.82312	57.16	5.66015	0.00226406
0.82316	63.03	5.61689	0.00224676
0.8232	106.4	5.56488	0.00222595
0.82324	54.36	5.50409	0.00220164
0.82328	23.2	5.43456	0.00217382
0.82332	50.17	5.35632	0.00214253
0.82336	50.05	5.26944	0.00210777
0.8234	39.3	5.17397	0.00206959
0.82344	53.35	5.07002	0.00202801
0.82348	51.38	4.95769	0.00198307
0.82352	41.18	4.83709	0.00193484
0.82356	23.32	4.70837	0.00188335
0.8236	34.21	4.57169	0.00182868
0.82364	33.69	4.4272	0.00177088
0.82368	12.08	4.27509	0.00171004
0.82372	-5.814	4.11553	0.00164621
0.82376	-4.716	3.94871	0.00157948
0.8238	-6.681	3.77481	0.00150992
0.82384	-29.17	3.59403	0.00143761
0.82388	-41.51	3.40652	0.00136261
0.82392	-46.8	3.21246	0.00128499
0.82396	-43.79	3.012	0.0012048
0.824	-56.3	2.80525	0.0011221
0.82404	-48.3	2.59233	0.00103693
0.82408	-34.34	2.37332	0.000949327
0.82412	-34.25	2.14829	0.000859315
0.82416	-14.25	1.91729	0.000766914
0.8242	2.567	1.68035	0.000672141
0.82424	0.6886	1.43752	0.000575009
0.82428	15.14	1.18882	0.000475529
0.82432	31.38	0.934287	0.000373715
0.82436	42.31	0.67395	0.00026958
0.8244	22.6	0.407863	0.000163145
0.82444	66.35	0.136086	5.44346e-05
0.82448	60.14	-0.141301	-5.65204e-05
0.82452	52.48	-0.4242	-0.00016968
0.82456	79.76	-0.71249	-0.000284996
0.8246	89.24	-1.00602	-0.000402408
0.82464	77.62	-1.30462	-0.000521846
0.82468	86.81	-1.60806	-0.000643226
0.82472	78.26	-1.91612	-0.000766448
0.82476	61.38	-2.22851	-0.000891404
0.8248	64.42	-2.54492	-0.00101797
0.82484	31.24	-2.86502	-0.00114601
0.82488	38.26	-3.18845	-0.00127538
0.82492	12.68	-3.51483	-0.00140593
0.82496	-7.462	-3.84377	-0.00153751
0.825	3.579	-4.17489	-0.00166996
0.82504	16.21	-4.50777	-0.00180311
0.82508	16.18	-4.84202	-0.00193681
0.82512	15.75	-5.17722	-0.00207089
0.82516	15.25	-5.51296	-0.00220518
0.8252	8.492	-5.84881	-0.00233952
0.82524	-28.3	-6.18434	-0.00247374
0.82528	-50.84	-6.51911	-0.00260765
0.82532	-48.27	-6.85271	-0.00274108
0.82536	-49.54	-7.1847	-0.00287388
0.8254	-41.36	-7.5147	-0.00300588
0.82544	-84.74	-7.84233	-0.00313693
0.82548	-95.61	-8.16723	-0.00326689
0.82552	-42.61	-8.48905	-0.00339562
0.82556	-31.94	-8.8075	-0.003523
0.8256	-36.88	-9.12228	-0.00364891
0.82564	-52.75	-9.43312	-0.00377325
0.82568	-40.09	-9.73974	-0.0038959
0.82572	-19.83	-10.0419	-0.00401676
0.82576	-46.42	-10.3394	-0.00413574
0.8258	-63.47	-10.6319	-0.00425275
0.82584	-69.08	-10.9193	-0.0043677
0.82588	-53.65	-11.2013	-0.00448051
0.82592	-73.65	-11.4778	-0.00459111
0.82596	-81.45	-11.7486	-0.00469944
0.826	-79.66	-12.0136	-0.00480545
0.82604	-36.39	-12.2727	-0.00490908
0.82608	-14.95	-12.5258	-0.00501032
0.82612	-51.59	-12.7728	-0.00510912
0.82616	-52.43	-13.0137	-0.00520547
0.8262	-65.99	-13.2484	-0.00529934
0.82624	-28.15	-13.4768	-0.00539072
0.82628	-20.32	-13.699	-0.0054796
0.82632	-49.8	-13.9149	-0.00556598
0.82636	-37.17	-14.1246	-0.00564985
0.8264	-41.91	-14.328	-0.00573122
0.82644	-21.8	-14.5252	-0.00581009
0.82648	-10.38	-14.7162	-0.00588648
0.82652	-11.74	-14.901	-0.00596039
0.82656	-0.4097	-15.0796	-0.00603183
0.8266	30.6	-15.2521	-0.00610082
0.82664	13.12	-15.4184	-0.00616736
0.82668	13.72	-15.5786	-0.00623146
0.82672	-18.99	-15.7328	-0.0062931
0.82676	-22.63	-15.8807	-0.0063523
0.8268	43	-16.0226	-0.00640902
0.82684	7.423	-16.1582	-0.00646328
0.82688	-12.63	-16.2876	-0.00651505
0.82692	-60.61	-16.4108	-0.00656431
0.82696	-54.63	-16.5276	-0.00661106
0.827	-15.26	-16.6382	-0.00665526
0.82704	-2.693	-16.7423	-0.00669693
0.82708	-1.884	-16.8401	-0.00673603
0.82712	-4.022	-16.9315	-0.00677258
0.82716	-10.93	-17.0164	-0.00680655
0.8272	-18.07	-17.0948	-0.00683793
0.82724	-15.24	-17.1668	-0.00686671
0.82728	15.95	-17.2322	-0.00689288
0.82732	-28.82	-17.291	-0.0069164
0.82736	-27.87	-17.3432	-0.00693728
0.8274	-37.29	-17.3887	-0.00695548
0.82744	-57.72	-17.4275	-0.006971
0.82748	-30.7	-17.4595	-0.00698382
0.82752	-8.444	-17.4848	-0.00699393
0.82756	-20.5	-17.5033	-0.00700132
0.8276	-43.67	-17.515	-0.00700599
0.82764	-59.37	-17.5199	-0.00700794
0.82768	-40.26	-17.5179	-0.00700716
0.82772	1.44	-17.5092	-0.00700366
0.82776	-32.87	-17.4936	-0.00699744
0.8278	-31.04	-17.4713	-0.00698851
0.82784	-37.55	-17.4422	-0.00697688
0.82788	-44.66	-17.4064	-0.00696256
0.82792	-42.75	-17.3639	-0.00694556
0.82796	-38.7	-17.3147	-0.00692589
0.828	-11.1	-17.259	-0.00690359
0.82804	-11.77	-17.1967	-0.00687867
0.82808	-0.7854	-17.1279	-0.00685116
0.82812	-11.94	-17.0527	-0.00682108
0.82816	-29.51	-16.9711	-0.00678845
0.8282	-20.09	-16.8832	-0.0067533
0.82824	7.769	-16.7891	-0.00671563
0.82828	-8.444	-16.6887	-0.00667548
0.82832	-19.14	-16.5822	-0.00663286
0.82836	-35.35	-16.4695	-0.0065878
0.8284	-35.29	-16.3507	-0.0065403
0.82844	-41.02	-16.226	-0.00649039
0.82848	-37.61	-16.0952	-0.00643809
0.82852	-41.65	-15.9586	-0.00638344
0.82856	-1.45	-15.8161	-0.00632646
0.8286	-32.72	-15.6679	-0.00626718
0.82864	-10.18	-15.5141	-0.00620564
0.82868	-21.45	-15.3547	-0.00614187
0.82872	-17.52	-15.1898	-0.00607591
0.82876	13.2	-15.0195	-0.00600779
0.8288	-5.352	-14.8439	-0.00593755
0.82884	-26.51	-14.663	-0.00586522
0.82888	-30.12	-14.4771	-0.00579082
0.82892	-42.46	-14.286	-0.0057144
0.82896	-28.1	-14.09	-0.00563599
0.829	-54.11	-13.8891	-0.00555563
0.82904	-20.67	-13.6834	-0.00547335
0.82908	7.162	-13.473	-0.0053892
0.82912	-16.48	-13.2581	-0.00530324
0.82916	-13.79	-13.0387	-0.0052155
0.8292	-16.02	-12.8151	-0.00512603
0.82924	-14.4	-12.5872	-0.00503488
0.82928	17.54	-12.3552	-0.0049421
0.82932	20.25	-12.1193	-0.00484772
0.82936	-4.34	-11.8795	-0.00475179
0.8294	-16.02	-11.6359	-0.00465435
0.82944	-30.7	-11.3886	-0.00455544
0.82948	-9.022	-11.1377	-0.00445509
0.82952	-8.04	-10.8833	-0.00435334
0.82956	-24.02	-10.6256	-0.00425022
0.8296	-15.12	-10.3645	-0.00414579
0.82964	13.93	-10.1002	-0.00404007
0.82968	-9.86	-9.83279	-0.00393312
0.82972	-19.98	-9.56239	-0.00382495
0.82976	-11.02	-9.28907	-0.00371563
0.8298	-14.66	-9.01294	-0.00360518
0.82984	-5.872	-8.73409	-0.00349364
0.82988	-7.751	-8.45263	-0.00338105
0.82992	2.885	-8.16865	-0.00326746
0.82996	-0.2941	-7.88225	-0.0031529
0.83	-6.103	-7.59352	-0.00303741
0.83004	-29.31	-7.30257	-0.00292103
0.83008	-12.03	-7.00948	-0.00280379
0.83012	7.278	-6.71435	-0.00268574
0.83016	-18.42	-6.41729	-0.00256692
0.8302	-3.993	-6.11839	-0.00244736
0.83024	-8.04	-5.81775	-0.0023271
0.83028	6.064	-5.51547	-0.00220619
0.83032	-15.26	-5.21166	-0.00208466
0.83036	-9.456	-4.90641	-0.00196256
0.8304	-9.6	-4.59982	-0.00183993
0.83044	-6.97	-4.292	-0.0017168
0.83048	-7.433	-3.98304	-0.00159322
0.83052	-21.68	-3.67307	-0.00146923
0.83056	8.376	-3.36217	-0.00134487
0.8306	13.09	-3.05048	-0.00122019
0.83064	1.874	-2.73808	-0.00109523
0.83068	-10.61	-2.4251	-0.00097004
0.83072	9.995	-2.11163	-0.00084465
0.83076	-7.49	-1.79777	-0.000719107
0.8308	12.28	-1.48362	-0.000593449
0.83084	-8.068	-1.16929	-0.000467718
0.83088	-9.542	-0.854881	-0.000341953
0.83092	-13.13	-0.540483	-0.000216193
0.83096	-3.444	-0.226203	-9.04811e-05
0.831	4.359	0.0878528	3.51411e-05
0.83104	8.29	0.401576	0.00016063
0.83108	10.89	0.714861	0.000285944
0.83112	3.608	1.0276	0.000411041
0.83116	-23.42	1.3397	0.00053588
0.8312	10.78	1.65105	0.00066042
0.83124	22.22	1.96155	0.000784619
0.83128	-0.4386	2.27109	0.000908436
0.83132	5.082	2.57958	0.00103183
0.83136	8.896	2.88691	0.00115476
0.8314	14.97	3.19299	0.0012772
0.83144	21.12	3.49773	0.00139909
0.83148	5.053	3.80104	0.00152042
0.83152	-15.32	4.10283	0.00164113
0.83156	-3.04	4.403	0.0017612
0.8316	-5.149	4.70149	0.0018806
0.83164	17.16	4.99819	0.00199927
0.83168	16.44	5.293	0.0021172
0.83172	31.96	5.58584	0.00223434
0.83176	13.67	5.87662	0.00235065
0.8318	12.42	6.16526	0.0024661
0.83184	33.9	6.45168	0.00258067
0.83188	19.33	6.73582	0.00269433
0.83192	18.61	7.01761	0.00280705
0.83196	7.278	7.297	0.0029188
0.832	10.31	7.57393	0.00302957
0.83204	7.943	7.84836	0.00313934
0.83208	-5.005	8.12022	0.00324809
0.83212	1.006	8.38947	0.00335579
0.83216	8.579	8.65606	0.00346242
0.8322	13.87	8.91992	0.00356797
0.83224	9.446	9.181	0.0036724
0.83228	23.84	9.43924	0.0037757
0.83232	32.05	9.6946	0.00387784
0.83236	15.02	9.94701	0.0039788
0.8324	32.51	10.1964	0.00407857
0.83244	16.04	10.4428	0.00417713
0.83248	21.61	10.6862	0.00427447
0.83252	35.05	10.9264	0.00437058
0.83256	11.06	11.1636	0.00446544
0.8326	14.88	11.3976	0.00455905
0.83264	28.29	11.6285	0.00465141
0.83268	4.07	11.8563	0.00474251
0.83272	-5.554	12.0809	0.00483234
0.83276	29.99	12.3023	0.00492091
0.8328	24.73	12.5205	0.0050082
0.83284	36.38	12.7355	0.00509421
0.83288	35.51	12.9474	0.00517895
0.83292	22.22	13.156	0.00526241
0.83296	-8.531	13.3615	0.0053446
0.833	-4.889	13.5638	0.00542552
0.83304	-6.363	13.7629	0.00550517
0.83308	-9.831	13.9589	0.00558356
0.83312	14.1	14.1517	0.00566069
0.83316	-1.855	14.3414	0.00573655
0.8332	5.602	14.5278	0.00581112
0.83324	47.48	14.711	0.00588441
0.83328	84.94	14.891	0.0059564
0.83332	103.9	15.0678	0.0060271
0.83336	104.8	15.2413	0.00609651
0.8334	94.36	15.4116	0.00616464
0.83344	79.59	15.5789	0.00623154
0.83348	-8.675	15.7431	0.00629725
0.83352	-39.74	15.9046	0.00636182
0.83356	-24.92	16.0633	0.0064253
0.8336	-26.77	16.2193	0.00648774
0.83364	-21.77	16.3729	0.00654916
0.83368	19.1	16.524	0.00660962
0.83372	6.787	16.6728	0.00666912
0.83376	-9.803	16.8193	0.00672771
0.8338	-0.8432	16.9635	0.00678539
0.83384	-7.635	17.1055	0.00684219
0.83388	13	17.2453	0.00689813
0.83392	48.2	17.3831	0.00695322
0.83396	20.28	17.5187	0.00700748
0.834	-6.537	17.6523	0.00706091
0.83404	-30.32	17.7838	0.00711354
0.83408	-89.63	17.9134	0.00716537
0.83412	-75.78	18.041	0.00721641
0.83416	-44.43	18.1666	0.00726665
0.8342	-37.55	18.2902	0.00731606
0.83424	25.63	18.4115	0.00736461
0.83428	104	18.5307	0.00741226
0.83432	126.9	18.6474	0.00745897
0.83436	182.1	18.7618	0.00750471
0.8344	211.8	18.8737	0.00754947
0.83444	132.7	18.9832	0.00759326
0.83448	42.54	19.0903	0.00763613
0.83452	28.52	19.1953	0.00767813
0.83456	-66.94	19.2983	0.00771933
0.8346	-104.4	19.3994	0.00775977
0.83464	-70.76	19.4988	0.00779952
0.83468	-78.82	19.5965	0.00783861
0.83472	-79.31	19.6927	0.00787706
0.83476	-8.964	19.7872	0.00791488
0.8348	15.72	19.8801	0.00795204
0.83484	11.47	19.9714	0.00798855
0.83488	-28.65	20.0609	0.00802437
0.83492	-54.11	20.1488	0.0080595
0.83496	-35.81	20.2347	0.0080939
0.835	26.58	20.3188	0.00812753
0.83504	27.8	20.4009	0.00816036
0.83508	9.648	20.4808	0.00819232
0.83512	-12.66	20.5585	0.00822339
0.83516	-40.81	20.6338	0.00825351
0.8352	-54.22	20.7065	0.00828262
0.83524	-36.3	20.7766	0.00831066
0.83528	19.27	20.8439	0.00833756
0.83532	80.05	20.9081	0.00836324
0.83536	152.3	20.969	0.00838762
0.8354	118	21.0266	0.00841063
0.83544	37.13	21.0805	0.00843222
0.83548	4.446	21.1308	0.00845234
0.83552	-14.83	21.1774	0.00847095
0.83556	-118.2	21.2201	0.00848802
0.8356	-74.54	21.2588	0.0085035
0.83564	51.64	21.2933	0.00851732
0.83568	101.9	21.3235	0.00852941
0.83572	146.9	21.3492	0.00853969
0.83576	160.3	21.3703	0.00854812
0.8358	106.7	21.3866	0.00855464
0.83584	69.21	21.3981	0.00855923
0.83588	75.98	21.4047	0.00856188
[truncated: 23,003 more rows]

## Sheet: Sheet2
0.99216	-26.62	0.303759	0.000121503
0.9922	-19.95	0.474773	0.000189909
0.99224	-27.58	0.644337	0.000257735
0.99228	-15.61	0.812429	0.000324972
0.99232	8.463	0.979017	0.000391607
0.99236	-1.421	1.14406	0.000457625
0.9924	2.423	1.30753	0.000523012
0.99244	-28.39	1.46938	0.000587751
0.99248	-10.41	1.62957	0.000651826
0.99252	12.83	1.78804	0.000715218
0.99256	-10.96	1.94476	0.000777905
0.9926	-2.548	2.09967	0.000839868
0.99264	13.43	2.25271	0.000901084
0.99268	10.4	2.40383	0.000961531
0.99272	-7.49	2.55297	0.00102119
0.99276	6.266	2.70008	0.00108003
0.9928	41.67	2.84512	0.00113805
0.99284	47.39	2.98803	0.00119521
0.99288	44.39	3.12877	0.00125151
0.99292	27.16	3.26734	0.00130694
0.99296	31.76	3.40372	0.00136149
0.993	2.798	3.53792	0.00141517
0.99304	2.827	3.66996	0.00146798
0.99308	-1.768	3.79985	0.00151994
0.99312	3.434	3.92761	0.00157104
0.99316	-3.647	4.05325	0.0016213
0.9932	-3.676	4.17679	0.00167072
0.99324	10.69	4.29824	0.0017193
0.99328	4.677	4.41761	0.00176705
0.99332	24.88	4.53492	0.00181397
0.99336	16.64	4.65017	0.00186007
0.9934	8.116	4.76339	0.00190536
0.99344	4.388	4.8746	0.00194984
0.99348	2.856	4.98383	0.00199353
0.99352	21.09	5.09109	0.00203644
0.99356	-0.1785	5.19642	0.00207857
0.9936	3.347	5.29985	0.00211994
0.99364	-3.126	5.4014	0.00216056
0.99368	-7.115	5.50111	0.00220044
0.99372	16.18	5.59899	0.00223959
0.99376	8.694	5.69507	0.00227803
0.9938	10.2	5.78937	0.00231575
0.99384	20.86	5.88192	0.00235277
0.99388	17.1	5.97275	0.0023891
0.99392	18.23	6.06189	0.00242475
0.99396	28.81	6.14937	0.00245975
0.994	4.099	6.23525	0.0024941
0.99404	8.665	6.31956	0.00252783
0.99408	9.966	6.40237	0.00256095
0.99412	2.191	6.48372	0.00259349
0.99416	-12.55	6.56365	0.00262546
0.9942	-6.912	6.64223	0.00265689
0.99424	21.44	6.7195	0.0026878
0.99428	13.64	6.79549	0.0027182
0.99432	9.185	6.87026	0.0027481
0.99436	8.579	6.94384	0.00277754
0.9944	5.371	7.01629	0.00280652
0.99444	22.39	7.08765	0.00283506
0.99448	-1.248	7.15797	0.00286319
0.99452	-4.918	7.22731	0.00289092
0.99456	10.17	7.2957	0.00291828
0.9946	-24.54	7.36321	0.00294528
0.99464	-7.606	7.42987	0.00297195
0.99468	-1.884	7.49572	0.00299829
0.99472	0.3128	7.56078	0.00302431
0.99476	2.134	7.62508	0.00305003
0.9948	5.515	7.68865	0.00307546
0.99484	7.134	7.7515	0.0031006
0.99488	12.28	7.81365	0.00312546
0.99492	9.157	7.87512	0.00315005
0.99496	4.879	7.93593	0.00317437
0.995	-5.785	7.9961	0.00319844
0.99504	-6.161	8.05564	0.00322226
0.99508	-10.12	8.11457	0.00324583
0.99512	0.08163	8.1729	0.00326916
0.99516	4.706	8.23063	0.00329225
0.9952	0.255	8.28776	0.0033151
0.99524	18.61	8.34428	0.00333771
0.99528	38.12	8.40019	0.00336007
0.99532	6.122	8.45548	0.00338219
0.99536	51.61	8.51017	0.00340407
0.9954	8.694	8.56427	0.00342571
0.99544	64.68	8.61779	0.00344712
0.99548	66.9	8.67078	0.00346831
0.99552	6.873	8.72327	0.00348931
0.99556	31.18	8.77533	0.00351013
0.9956	61.06	8.82704	0.00353081
0.99564	44.59	8.87847	0.00355139
0.99568	11.38	8.92972	0.00357189
0.99572	28.38	8.98091	0.00359236
0.99576	48.29	9.03215	0.00361286
0.9958	55.02	9.08356	0.00363342
0.99584	40.8	9.13529	0.00365412
0.99588	47.54	9.18749	0.003675
0.99592	28.06	9.24033	0.00369613
0.99596	40.8	9.29399	0.0037176
0.996	49.01	9.34867	0.00373947
0.99604	26.58	9.40456	0.00376183
0.99608	31.93	9.4619	0.00378476
0.99612	20.95	9.5209	0.00380836
0.99616	11.04	9.58181	0.00383272
0.9962	35.4	9.64485	0.00385794
0.99624	24.27	9.71028	0.00388411
0.99628	44.42	9.77835	0.00391134
0.99632	25.4	9.84931	0.00393972
0.99636	21.79	9.92344	0.00396938
0.9964	46.9	10.001	0.0040004
0.99644	22.25	10.0823	0.00403292
0.99648	31.41	10.1676	0.00406705
0.99652	21.93	10.2573	0.00410291
0.99656	48.87	10.3516	0.00414062
0.9966	17.51	10.4508	0.00418031
0.99664	41.27	10.5553	0.00422212
0.99668	36.47	10.6654	0.00426617
0.99672	-21.22	10.7815	0.0043126
0.99676	40.72	10.9039	0.00436156
0.9968	29.42	11.033	0.00441318
0.99684	49.42	11.169	0.00446761
0.99688	1.209	11.3125	0.00452499
0.99692	42.83	11.4637	0.00458546
0.99696	33.98	11.623	0.00464919
0.997	39.13	11.7908	0.00471633
0.99704	-16.68	11.9676	0.00478702
0.99708	-33.33	12.1536	0.00486144
0.99712	-14.2	12.3493	0.00493974
0.99716	-10.7	12.5552	0.00502206
0.9972	-10.7	12.7714	0.00510857
0.99724	7.625	12.9985	0.00519939
0.99728	14.73	13.2367	0.00529467
0.99732	10.89	13.4864	0.00539455
0.99736	30.92	13.7479	0.00549916
0.9974	22.88	14.0216	0.00560865
0.99744	2.307	14.3079	0.00572316
0.99748	40.23	14.607	0.00584282
0.99752	79.1	14.9194	0.00596778
0.99756	5.226	15.2454	0.00609818
0.9976	3.116	15.5854	0.00623418
0.99764	11.18	15.9398	0.00637592
0.99768	-24.51	16.3089	0.00652356
0.99772	-18.36	16.6931	0.00667724
0.99776	-15.41	17.0928	0.00683712
0.9978	16.27	17.5083	0.00700332
0.99784	24.19	17.94	0.00717598
0.99788	107.1	18.3881	0.00735524
0.99792	180.2	18.8531	0.00754124
0.99796	34.21	19.3353	0.00773412
0.998	45.34	19.8351	0.00793405
0.99804	24.45	20.353	0.00814121
0.99808	-34.28	20.8894	0.00835577
0.99812	12.42	21.4448	0.00857792
0.99816	32.13	22.0196	0.00880782
0.9982	-24.48	22.6141	0.00904565
0.99824	9.417	23.229	0.00929158
0.99828	9.792	23.8644	0.00954577
0.99832	84.79	24.521	0.00980838
0.99836	64.24	25.199	0.0100796
0.9984	61.58	25.8989	0.0103595
0.99844	45.34	26.6211	0.0106484
0.99848	28.81	27.3661	0.0109465
0.99852	59.53	28.1344	0.0112538
0.99856	41.03	28.9264	0.0115706
0.9986	17.19	29.7425	0.011897
0.99864	-18.7	30.5834	0.0122333
0.99868	-16.62	31.4493	0.0125797
0.99872	-12.35	32.3408	0.0129363
0.99876	-5.525	33.2583	0.0133033
0.9988	97.65	34.2023	0.0136809
0.99884	62.28	35.1731	0.0140692
0.99888	85.43	36.1712	0.0144685
0.99892	76.58	37.197	0.0148788
0.99896	72.07	38.2509	0.0153004
0.999	74.7	39.3335	0.0157334
0.99904	30.8	40.4453	0.0161781
0.99908	17.65	41.5866	0.0166347
0.99912	2.972	42.7581	0.0171032
0.99916	19.19	43.9602	0.0175841
0.9992	58.43	45.1933	0.0180773
0.99924	24.13	46.458	0.0185832
0.99928	7.249	47.7547	0.0191019
0.99932	51.06	49.0839	0.0196336
0.99936	64.7	50.446	0.0201784
0.9994	46.67	51.8414	0.0207366
0.99944	53.32	53.2706	0.0213083
0.99948	111	54.7341	0.0218936
0.99952	103.3	56.2323	0.0224929
0.99956	96.5	57.7657	0.0231063
0.9996	67.8	59.3347	0.0237339
0.99964	46.93	60.9398	0.0243759
0.99968	46.35	62.5817	0.0250327
0.99972	30.23	64.2607	0.0257043
0.99976	27.36	65.9773	0.0263909
0.9998	29.1	67.7321	0.0270928
0.99984	24.1	69.5254	0.0278102
0.99988	36.64	71.3578	0.0285431
0.99992	44.79	73.2297	0.0292919
0.99996	31.96	75.1415	0.0300566
1	32.94	77.0936	0.0308374
1.00004	58.2	79.0863	0.0316345
1.00008	106.6	81.1201	0.0324481
1.00012	87.1	83.1954	0.0332782
1.00016	102.1	85.3125	0.034125
1.0002	122.2	87.4718	0.0349887
1.00024	104.8	89.6736	0.0358694
1.00028	85.57	91.9184	0.0367674
1.00032	101.7	94.2066	0.0376826
1.00036	69.76	96.5385	0.0386154
1.0004	82.62	98.9146	0.0395658
1.00044	79.68	101.335	0.0405341
1.00048	60.37	103.801	0.0415203
1.00052	89.47	106.312	0.0425247
1.00056	73.64	108.868	0.0435473
1.0006	74.5	111.471	0.0445883
1.00064	51.01	114.12	0.0456479
1.00068	40.95	116.815	0.0467261
1.00072	87.39	119.558	0.0478232
1.00076	83.23	122.348	0.0489391
1.0008	74.44	125.185	0.050074
1.00084	82.97	128.07	0.0512281
1.00088	66.12	131.003	0.0524013
1.00092	99.36	133.984	0.0535938
1.00096	152.9	137.014	0.0548056
1.001	149.6	140.092	0.0560368
1.00104	144.5	143.219	0.0572875
1.00108	104.6	146.394	0.0585577
1.00112	132.3	149.619	0.0598476
1.00116	126.9	152.893	0.0611571
1.0012	-5.121	156.216	0.0624863
1.00124	10.63	159.588	0.0638353
1.00128	54.73	163.01	0.0652041
1.00132	10.11	166.482	0.0665928
1.00136	-1.941	170.003	0.0680012
1.0014	48	173.573	0.0694294
1.00144	55.66	177.193	0.0708773
1.00148	89.56	180.862	0.0723448
1.00152	148.8	184.579	0.0738318
1.00156	134.9	188.345	0.0753382
1.0016	194.6	192.16	0.0768639
1.00164	190.4	196.022	0.0784087
1.00168	125.7	199.931	0.0799726
1.00172	115.2	203.888	0.0815553
1.00176	56.53	207.892	0.0831568
1.0018	-32.89	211.942	0.0847768
1.00184	-94.54	216.038	0.0864152
1.00188	-50.44	220.179	0.0880718
1.00192	-110.5	224.366	0.0897462
1.00196	-205.1	228.596	0.0914382
1.002	-31.33	232.869	0.0931474
1.00204	58.38	237.184	0.0948734
1.00208	60.98	241.539	0.0966157
1.00212	238.1	245.934	0.0983737
1.00216	330	250.367	0.100147
1.0022	338.5	254.838	0.101935
1.00224	282.6	259.343	0.103737
1.00228	185	263.883	0.105553
1.00232	132.7	268.456	0.107382
1.00236	64.65	273.06	0.109224
1.0024	-46.33	277.694	0.111078
1.00244	10.49	282.358	0.112943
1.00248	44.76	287.048	0.114819
1.00252	10.98	291.764	0.116706
1.00256	84.07	296.504	0.118602
1.0026	146.6	301.266	0.120506
1.00264	165.9	306.048	0.122419
1.00268	175.7	310.847	0.124339
1.00272	260.5	315.663	0.126265
1.00276	282.2	320.492	0.128197
1.0028	206.6	325.332	0.130133
1.00284	143.7	330.182	0.132073
1.00288	43.46	335.039	0.134016
1.00292	-92.6	339.901	0.13596
1.00296	-135.8	344.765	0.137906
1.003	-174.1	349.629	0.139851
1.00304	-135.9	354.489	0.141796
1.00308	-6.681	359.344	0.143738
1.00312	112.6	364.19	0.145676
1.00316	168.3	369.022	0.147609
1.0032	184.7	373.839	0.149536
1.00324	204.3	378.637	0.151455
1.00328	160.4	383.411	0.153365
1.00332	105.6	388.159	0.155264
1.00336	69.76	392.876	0.157151
1.0034	62.42	397.559	0.159024
1.00344	28.12	402.204	0.160881
1.00348	1.151	406.806	0.162722
1.00352	-24.31	411.361	0.164544
1.00356	11.56	415.865	0.166346
1.0036	49.88	420.313	0.168125
1.00364	89.68	424.701	0.16988
1.00368	226	429.023	0.171609
1.00372	319.1	433.275	0.17331
1.00376	310.7	437.451	0.174981
1.0038	280.3	441.547	0.176619
1.00384	238.4	445.556	0.178222
1.00388	150.4	449.474	0.17979
1.00392	50.31	453.295	0.181318
1.00396	34.5	457.014	0.182806
1.004	32.08	460.626	0.18425
1.00404	44.3	464.123	0.185649
1.00408	196.8	467.501	0.187
1.00412	611.2	470.753	0.188301
1.00416	1438	473.872	0.189549
1.0042	2110	476.854	0.190742
1.00424	2405	479.692	0.191877
1.00428	3074	482.381	0.192952
1.00432	3406	484.917	0.193967
1.00436	3393	487.296	0.194919
1.0044	3769	489.517	0.195807
1.00444	3776	491.578	0.196631
1.00448	3368	493.479	0.197392
1.00452	3099	495.223	0.198089
1.00456	2732	496.811	0.198725
1.0046	2287	498.248	0.199299
1.00464	2005	499.538	0.199815
1.00468	1742	500.686	0.200274
1.00472	1360	501.698	0.200679
1.00476	1067	502.58	0.201032
1.0048	871	503.34	0.201336
1.00484	733.2	503.985	0.201594
1.00488	606.1	504.52	0.201808
1.00492	371.9	504.955	0.201982
1.00496	221.8	505.295	0.202118
1.005	141	505.548	0.202219
1.00504	1.324	505.722	0.202289
1.00508	-109.6	505.823	0.202329
1.00512	-213.5	505.858	0.202343
1.00516	-321.3	505.833	0.202333
1.0052	-290.2	505.755	0.202302
1.00524	-200.6	505.63	0.202252
1.00528	-114.2	505.463	0.202185
1.00532	65.57	505.26	0.202104
1.00536	316	505.026	0.20201
1.0054	396.1	504.765	0.201906
1.00544	422.5	504.483	0.201793
1.00548	329.5	504.184	0.201674
1.00552	170.7	503.874	0.20155
1.00556	116.9	503.556	0.201422
1.0056	74.04	503.235	0.201294
1.00564	-36.68	502.917	0.201167
1.00568	-173	502.604	0.201041
1.00572	-206.2	502.301	0.20092
1.00576	9.821	502.011	0.200804
1.0058	132.4	501.739	0.200696
1.00584	151.2	501.487	0.200595
1.00588	219.9	501.258	0.200503
1.00592	288.9	501.056	0.200423
1.00596	301	500.884	0.200354
1.006	288.9	500.744	0.200297
1.00604	267.9	500.638	0.200255
1.00608	97.1	500.57	0.200228
1.00612	124.7	500.542	0.200217
1.00616	99.99	500.556	0.200222
1.0062	-186.2	500.615	0.200246
1.00624	-243.1	500.72	0.200288
1.00628	-156.3	500.873	0.200349
1.00632	-135.8	501.077	0.200431
1.00636	-45.24	501.331	0.200532
1.0064	86.73	501.637	0.200655
1.00644	122.8	501.996	0.200798
1.00648	205.5	502.408	0.200963
1.00652	107.4	502.874	0.20115
1.00656	45.43	503.394	0.201358
1.0066	97.54	503.969	0.201587
1.00664	123.5	504.597	0.201839
1.00668	35.02	505.28	0.202112
1.00672	55.92	506.016	0.202406
1.00676	100.9	506.805	0.202722
1.0068	-37.32	507.646	0.203059
1.00684	-49.74	508.539	0.203416
1.00688	-40.87	509.483	0.203793
1.00692	-48.79	510.475	0.20419
1.00696	23.49	511.515	0.204606
1.007	151.3	512.601	0.20504
1.00704	290.1	513.731	0.205492
1.00708	334.3	514.902	0.205961
1.00712	296.1	516.113	0.206445
1.00716	197.7	517.361	0.206945
1.0072	175.6	518.645	0.207458
1.00724	123.9	519.961	0.207984
1.00728	65.34	521.306	0.208523
1.00732	103.5	522.679	0.209072
1.00736	130.7	524.076	0.20963
1.0074	47.57	525.494	0.210198
1.00744	24.01	526.93	0.210772
1.00748	-35.81	528.38	0.211352
1.00752	-1.479	529.841	0.211936
1.00756	52.68	531.308	0.212523
1.0076	127	532.778	0.213111
1.00764	240.9	534.246	0.213698
1.00768	308.3	535.708	0.214283
1.00772	361.8	537.16	0.214864
1.00776	370.5	538.596	0.215438
1.0078	393.4	540.012	0.216005
1.00784	500.1	541.403	0.216561
1.00788	768	542.765	0.217106
1.00792	1129	544.092	0.217637
1.00796	1475	545.379	0.218152
1.008	1799	546.624	0.218649
1.00804	2305	547.82	0.219128
1.00808	2643	548.965	0.219586
1.00812	2755	550.055	0.220022
1.00816	2877	551.089	0.220436
1.0082	2971	552.065	0.220826
1.00824	2948	552.984	0.221193
1.00828	2854	553.845	0.221538
1.00832	2584	554.65	0.22186
1.00836	2396	555.401	0.222161
1.0084	2079	556.103	0.222441
1.00844	1620	556.758	0.222703
1.00848	1211	557.372	0.222949
1.00852	824.5	557.949	0.22318
1.00856	435.3	558.495	0.223398
1.0086	30.66	559.015	0.223606
1.00864	-233.9	559.515	0.223806
1.00868	-345	559.999	0.223999
1.00872	-397	560.472	0.224189
1.00876	-341.6	560.939	0.224376
1.0088	-251.4	561.404	0.224562
1.00884	-18.42	561.871	0.224748
1.00888	227.1	562.343	0.224937
1.00892	303.5	562.823	0.225129
1.00896	394	563.315	0.225326
1.009	538.4	563.822	0.225529
1.00904	478.8	564.346	0.225738
1.00908	327.6	564.891	0.225956
1.00912	209.3	565.458	0.226183
1.00916	-58.73	566.052	0.226421
1.0092	-325.3	566.674	0.22667
1.00924	-380.7	567.327	0.226931
1.00928	-380.1	568.013	0.227205
1.00932	-272.7	568.734	0.227494
1.00936	23.78	569.49	0.227796
1.0094	257.9	570.283	0.228113
1.00944	475.1	571.114	0.228445
1.00948	670	571.982	0.228793
1.00952	641.2	572.89	0.229156
1.00956	550	573.836	0.229534
1.0096	498.5	574.823	0.229929
1.00964	271.3	575.85	0.23034
1.00968	65.11	576.918	0.230767
1.00972	-19.83	578.027	0.231211
1.00976	-225.6	579.178	0.231671
1.0098	-291.1	580.371	0.232148
1.00984	-257.4	581.605	0.232642
1.00988	-238	582.879	0.233152
1.00992	-87.95	584.193	0.233677
1.00996	173.2	585.546	0.234218
1.01	402.5	586.935	0.234774
1.01004	555.1	588.359	0.235344
1.01008	649.3	589.817	0.235927
1.01012	528	591.306	0.236522
1.01016	343.4	592.825	0.23713
1.0102	165	594.371	0.237748
1.01024	-29.66	595.943	0.238377
1.01028	-162.1	597.539	0.239015
1.01032	-146.3	599.155	0.239662
1.01036	-141.8	600.791	0.240316
1.0104	-37.89	602.441	0.240977
1.01044	99.44	604.105	0.241642
1.01048	332.5	605.776	0.242311
1.01052	728	607.454	0.242981
1.01056	1043	609.132	0.243653
1.0106	1340	610.808	0.244323
1.01064	1773	612.478	0.244991
1.01068	1938	614.139	0.245656
1.01072	1854	615.788	0.246315
1.01076	1928	617.423	0.246969
1.0108	1937	619.042	0.247617
1.01084	1829	620.643	0.248257
1.01088	1783	622.226	0.24889
1.01092	1769	623.791	0.249516
1.01096	1667	625.337	0.250135
1.011	1470	626.865	0.250746
1.01104	1241	628.376	0.251351
1.01108	1107	629.873	0.251949
1.01112	870.6	631.355	0.252542
1.01116	588.2	632.825	0.25313
1.0112	465.4	634.285	0.253714
1.01124	402.8	635.736	0.254294
1.01128	271.7	637.181	0.254872
1.01132	161.5	638.621	0.255448
1.01136	171.5	640.057	0.256023
1.0114	228.7	641.492	0.256597
1.01144	281.8	642.925	0.25717
1.01148	324.4	644.359	0.257744
1.01152	309.3	645.795	0.258318
1.01156	289.7	647.232	0.258893
1.0116	240	648.672	0.259469
1.01164	277.6	650.114	0.260046
1.01168	291.8	651.56	0.260624
1.01172	257.5	653.01	0.261204
1.01176	319.4	654.463	0.261785
1.0118	380.1	655.92	0.262368
1.01184	406.3	657.38	0.262952
1.01188	410.4	658.843	0.263537
1.01192	429.3	660.308	0.264123
1.01196	452.8	661.775	0.26471
1.012	455.3	663.243	0.265297
1.01204	478.3	664.712	0.265885
1.01208	533.8	666.18	0.266472
1.01212	575.1	667.647	0.267059
1.01216	634.8	669.111	0.267644
1.0122	704.8	670.572	0.268229
1.01224	862.1	672.029	0.268812
1.01228	963.2	673.481	0.269393
1.01232	1043	674.927	0.269971
1.01236	1128	676.366	0.270546
1.0124	1193	677.797	0.271119
1.01244	1193	679.221	0.271688
1.01248	1194	680.636	0.272254
1.01252	1206	682.042	0.272817
1.01256	1210	683.441	0.273376
1.0126	1188	684.832	0.273933
1.01264	1132	686.215	0.274486
1.01268	1026	687.592	0.275037
1.01272	938.2	688.964	0.275586
1.01276	865.3	690.331	0.276132
1.0128	767.3	691.694	0.276678
1.01284	603.9	693.055	0.277222
1.01288	503.4	694.416	0.277766
1.01292	429	695.777	0.278311
1.01296	357.6	697.139	0.278855
1.013	274.9	698.503	0.279401
1.01304	250.9	699.871	0.279949
1.01308	237.1	701.243	0.280497
1.01312	247.1	702.62	0.281048
1.01316	269.6	704.002	0.281601
1.0132	292.9	705.389	0.282156
1.01324	327.5	706.782	0.282713
1.01328	312.3	708.18	0.283272
1.01332	328.5	709.582	0.283833
1.01336	340.7	710.99	0.284396
1.0134	348.6	712.401	0.28496
1.01344	395.7	713.815	0.285526
1.01348	483.7	715.231	0.286092
1.01352	591.8	716.649	0.28666
1.01356	671.4	718.067	0.287227
1.0136	741.7	719.484	0.287793
1.01364	785.7	720.898	0.288359
1.01368	788.4	722.31	0.288924
1.01372	750.5	723.717	0.289487
1.01376	717.3	725.119	0.290047
1.0138	775.5	726.513	0.290605
1.01384	952.7	727.9	0.29116
1.01388	1014	729.279	0.291712
1.01392	1037	730.647	0.292259
1.01396	1148	732.005	0.292802
1.014	1200	733.351	0.293341
1.01404	1262	734.686	0.293874
1.01408	1282	736.008	0.294403
1.01412	1278	737.317	0.294927
1.01416	1302	738.614	0.295446
1.0142	1220	739.899	0.295959
1.01424	1136	741.171	0.296468
1.01428	966.4	742.433	0.296973
1.01432	807.7	743.683	0.297473
1.01436	719.2	744.925	0.29797
1.0144	617.3	746.157	0.298463
1.01444	571.9	747.382	0.298953
1.01448	607.3	748.599	0.29944
1.01452	610.8	749.811	0.299924
1.01456	632.9	751.017	0.300407
1.0146	624.3	752.218	0.300887
1.01464	649.8	753.415	0.301366
1.01468	696.3	754.609	0.301844
1.01472	728.1	755.8	0.30232
1.01476	749	756.988	0.302795
1.0148	770.4	758.174	0.30327
1.01484	761.4	759.359	0.303743
1.01488	715.7	760.543	0.304217
1.01492	653.2	761.726	0.30469
1.01496	628.7	762.909	0.305164
1.015	595.6	764.093	0.305637
1.01504	557.5	765.278	0.306111
1.01508	558.7	766.464	0.306585
1.01512	553.5	767.651	0.30706
1.01516	527.4	768.84	0.307536
1.0152	518.2	770.03	0.308012
1.01524	532.2	771.222	0.308489
1.01528	562	772.416	0.308966
1.01532	592.1	773.611	0.309444
1.01536	630.6	774.806	0.309923
1.0154	711.4	776.003	0.310401
1.01544	817.1	777.2	0.31088
1.01548	866.4	778.396	0.311358
1.01552	891	779.592	0.311837
1.01556	928.7	780.786	0.312315
1.0156	1050	781.98	0.312792
1.01564	1098	783.171	0.313269
1.01568	1080	784.361	0.313744
1.01572	1098	785.549	0.31422
1.01576	1029	786.735	0.314694
1.0158	950.8	787.919	0.315167
1.01584	908.7	789.101	0.315641
1.01588	861.7	790.283	0.316113
1.01592	842.1	791.463	0.316585
1.01596	816.9	792.644	0.317057
1.016	757.7	793.824	0.31753
1.01604	685.1	795.004	0.318002
1.01608	630.4	796.186	0.318474
1.01612	654.7	797.369	0.318948
1.01616	713.8	798.553	0.319421
1.0162	733.7	799.739	0.319896
1.01624	690.5	800.928	0.320371
1.01628	665.2	802.118	0.320847
1.01632	701.7	803.311	0.321324
1.01636	702.2	804.506	0.321803
1.0164	748.2	805.704	0.322282
1.01644	767	806.905	0.322762
1.01648	800.4	808.108	0.323243
1.01652	844.8	809.314	0.323725
1.01656	847.8	810.522	0.324209
1.0166	813.9	811.733	0.324693
1.01664	794.7	812.946	0.325178
1.01668	822.7	814.162	0.325665
1.01672	787.7	815.38	0.326152
1.01676	789.7	816.601	0.326641
1.0168	713.2	817.825	0.32713
1.01684	683.2	819.051	0.32762
1.01688	669	820.279	0.328112
1.01692	626	821.51	0.328604
1.01696	636.3	822.743	0.329097
1.017	628.1	823.978	0.329591
1.01704	663.9	825.214	0.330086
1.01708	676.9	826.452	0.330581
1.01712	677.7	827.69	0.331076
1.01716	672.4	828.928	0.331571
1.0172	654.3	830.166	0.332066
1.01724	617.2	831.403	0.332561
1.01728	626.1	832.638	0.333055
1.01732	635.4	833.87	0.333548
1.01736	651.9	835.099	0.33404
1.0174	743.3	836.323	0.334529
1.01744	812.4	837.542	0.335017
1.01748	877.2	838.754	0.335502
1.01752	921.9	839.959	0.335983
1.01756	1022	841.154	0.336462
1.0176	1160	842.34	0.336936
1.01764	1271	843.516	0.337406
1.01768	1308	844.68	0.337872
1.01772	1350	845.831	0.338332
1.01776	1328	846.97	0.338788
1.0178	1310	848.096	0.339238
1.01784	1288	849.209	0.339684
1.01788	1261	850.309	0.340124
1.01792	1269	851.396	0.340558
1.01796	1230	852.471	0.340988
1.018	1192	853.534	0.341414
1.01804	1117	854.587	0.341835
1.01808	1030	855.629	0.342252
1.01812	966.5	856.662	0.342665
1.01816	912.8	857.687	0.343075
1.0182	889.9	858.705	0.343482
1.01824	849.2	859.717	0.343887
1.01828	828.1	860.725	0.34429
1.01832	767.6	861.728	0.344691
1.01836	745.3	862.729	0.345092
1.0184	698.6	863.729	0.345492
1.01844	679.7	864.728	0.345891
1.01848	670.9	865.728	0.346291
1.01852	604.6	866.73	0.346692
1.01856	613.1	867.733	0.347093
1.0186	590.3	868.739	0.347496
1.01864	587.4	869.749	0.3479
1.01868	535.6	870.763	0.348305
1.01872	466.1	871.782	0.348713
1.01876	461.8	872.805	0.349122
1.0188	435.4	873.832	0.349533
1.01884	427.1	874.865	0.349946
1.01888	387.8	875.902	0.350361
1.01892	415.6	876.942	0.350777
1.01896	438.8	877.986	0.351195
1.019	495.9	879.033	0.351613
1.01904	578.2	880.081	0.352032
1.01908	670.2	881.13	0.352452
1.01912	803.2	882.177	0.352871
1.01916	904	883.223	0.353289
1.0192	1002	884.265	0.353706
1.01924	1038	885.302	0.354121
1.01928	1075	886.334	0.354533
1.01932	1144	887.358	0.354943
1.01936	1182	888.373	0.355349
1.0194	1227	889.379	0.355751
1.01944	1245	890.374	0.356149
1.01948	1287	891.357	0.356543
1.01952	1319	892.329	0.356932
1.01956	1366	893.288	0.357315
1.0196	1360	894.234	0.357694
1.01964	1344	895.167	0.358067
1.01968	1362	896.087	0.358435
1.01972	1301	896.994	0.358798
1.01976	1210	897.888	0.359155
1.0198	1144	898.771	0.359508
1.01984	1054	899.642	0.359857
1.01988	1002	900.503	0.360201
1.01992	966.5	901.353	0.360541
1.01996	905.2	902.195	0.360878
1.02	878	903.029	0.361212
1.02004	876.5	903.855	0.361542
1.02008	865.8	904.676	0.36187
1.02012	848.9	905.491	0.362196
1.02016	849.4	906.301	0.36252
1.0202	828.1	907.108	0.362843
1.02024	789.2	907.912	0.363165
1.02028	798.2	908.713	0.363485
1.02032	767	909.514	0.363805
1.02036	729.3	910.313	0.364125
1.0204	698.1	911.113	0.364445
1.02044	663.6	911.913	0.364765
1.02048	654.5	912.713	0.365085
1.02052	598.6	913.516	0.365406
1.02056	603.5	914.319	0.365728
1.0206	585.7	915.125	0.36605
1.02064	571.9	915.932	0.366373
1.02068	561.3	916.741	0.366696
1.02072	557.6	917.551	0.367021
1.02076	578.4	918.363	0.367345
1.0208	576.4	919.175	0.36767
1.02084	601.4	919.986	0.367994
1.02088	644.7	920.797	0.368319
1.02092	721.5	921.605	0.368642
1.02096	779.4	922.411	0.368965
1.021	888.5	923.213	0.369285
1.02104	957.5	924.01	0.369604
1.02108	1064	924.8	0.36992
1.02112	1183	925.582	0.370233
1.02116	1306	926.356	0.370543
1.0212	1390	927.121	0.370848
1.02124	1464	927.875	0.37115
1.02128	1500	928.617	0.371447
1.02132	1515	929.349	0.371739
1.02136	1492	930.068	0.372027
1.0214	1445	930.775	0.37231
1.02144	1376	931.471	0.372588
1.02148	1277	932.156	0.372862
1.02152	1171	932.83	0.373132
1.02156	1059	933.494	0.373397
1.0216	958.2	934.148	0.373659
1.02164	864.7	934.795	0.373918
1.02168	737.3	935.434	0.374174
1.02172	657.3	936.067	0.374427
1.02176	590	936.693	0.374677
1.0218	532.2	937.315	0.374926
1.02184	564.5	937.932	0.375173
1.02188	598.2	938.545	0.375418
1.02192	629.8	939.154	0.375661
1.02196	651.9	939.759	0.375903
1.022	755.4	940.36	0.376144
1.02204	854.8	940.956	0.376383
1.02208	932.6	941.549	0.37662
1.02212	1007	942.137	0.376855
1.02216	1045	942.721	0.377088
1.0222	1079	943.299	0.37732
1.02224	1068	943.872	0.377549
1.02228	1040	944.44	0.377776
1.02232	974.3	945.002	0.378001
1.02236	901.9	945.559	0.378224
1.0224	834.6	946.111	0.378444
1.02244	765.2	946.657	0.378663
1.02248	723.5	947.197	0.378879
1.02252	682.5	947.731	0.379092
1.02256	680.9	948.259	0.379304
1.0226	693.6	948.78	0.379512
1.02264	714.2	949.295	0.379718
1.02268	772.2	949.801	0.379921
1.02272	832.1	950.3	0.38012
1.02276	898.7	950.789	0.380316
1.0228	984.1	951.269	0.380508
1.02284	1098	951.738	0.380695
1.02288	1188	952.196	0.380878
1.02292	1260	952.642	0.381057
1.02296	1327	953.075	0.38123
1.023	1337	953.494	0.381398
1.02304	1368	953.901	0.38156
1.02308	1349	954.293	0.381717
1.02312	1303	954.671	0.381869
1.02316	1221	955.036	0.382014
1.0232	1145	955.387	0.382155
1.02324	1046	955.725	0.38229
1.02328	930.8	956.05	0.38242
1.02332	797.9	956.363	0.382545
1.02336	717.7	956.664	0.382665
1.0234	653.2	956.953	0.382781
1.02344	586.7	957.231	0.382892
1.02348	569	957.497	0.382999
1.02352	590.2	957.753	0.383101
1.02356	636.3	957.997	0.383199
1.0236	681.5	958.23	0.383292
1.02364	780.7	958.45	0.38338
1.02368	878.8	958.658	0.383463
1.02372	977.9	958.854	0.383541
1.02376	1069	959.035	0.383614
1.0238	1169	959.202	0.383681
1.02384	1226	959.355	0.383742
1.02388	1280	959.492	0.383797
1.02392	1284	959.614	0.383846
1.02396	1309	959.72	0.383888
1.024	1308	959.809	0.383924
1.02404	1280	959.883	0.383953
1.02408	1211	959.941	0.383976
1.02412	1153	959.983	0.383993
1.02416	1084	960.01	0.384004
1.0242	980.3	960.023	0.384009
1.02424	902.9	960.021	0.384008
1.02428	823.8	960.005	0.384002
1.02432	740.8	959.976	0.38399
1.02436	709.4	959.934	0.383974
1.0244	723.8	959.88	0.383952
1.02444	710.6	959.813	0.383925
1.02448	742.9	959.734	0.383894
1.02452	809.9	959.644	0.383857
1.02456	883	959.541	0.383816
1.0246	951.6	959.426	0.38377
1.02464	1026	959.298	0.383719
1.02468	1096	959.158	0.383663
