# Supplementary material for: Shear Thickening Fluids in Cork Agglomerates: An Exploration of Advantages and Drawbacks
Source: Preprints.org preprint supplement (doi:10.20944/preprints202304.0004.v1), 2023-04-03
Supplement: Supplementary file 6 [file Amostra 30-report 1.pdf › Supplementary Material/SEM Images/30� STF/Amostra 30-report 1.pdf]

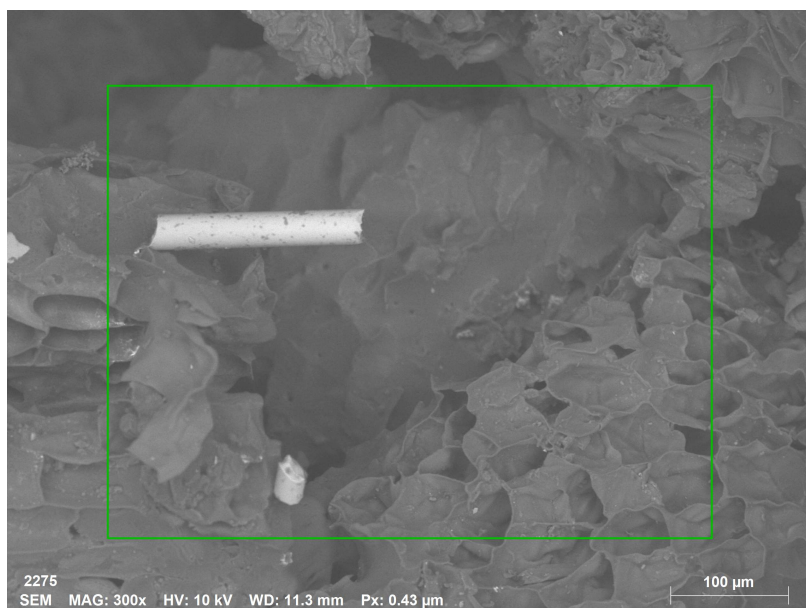

| Name | Date       | Time     | HV<br>[kV] | Mag  | WD<br>[mm] |
|------|------------|----------|------------|------|------------|
| 2275 | 20/07/2022 | 15:45:59 | 10.0 keV   | 300x | 11.3 mm    |

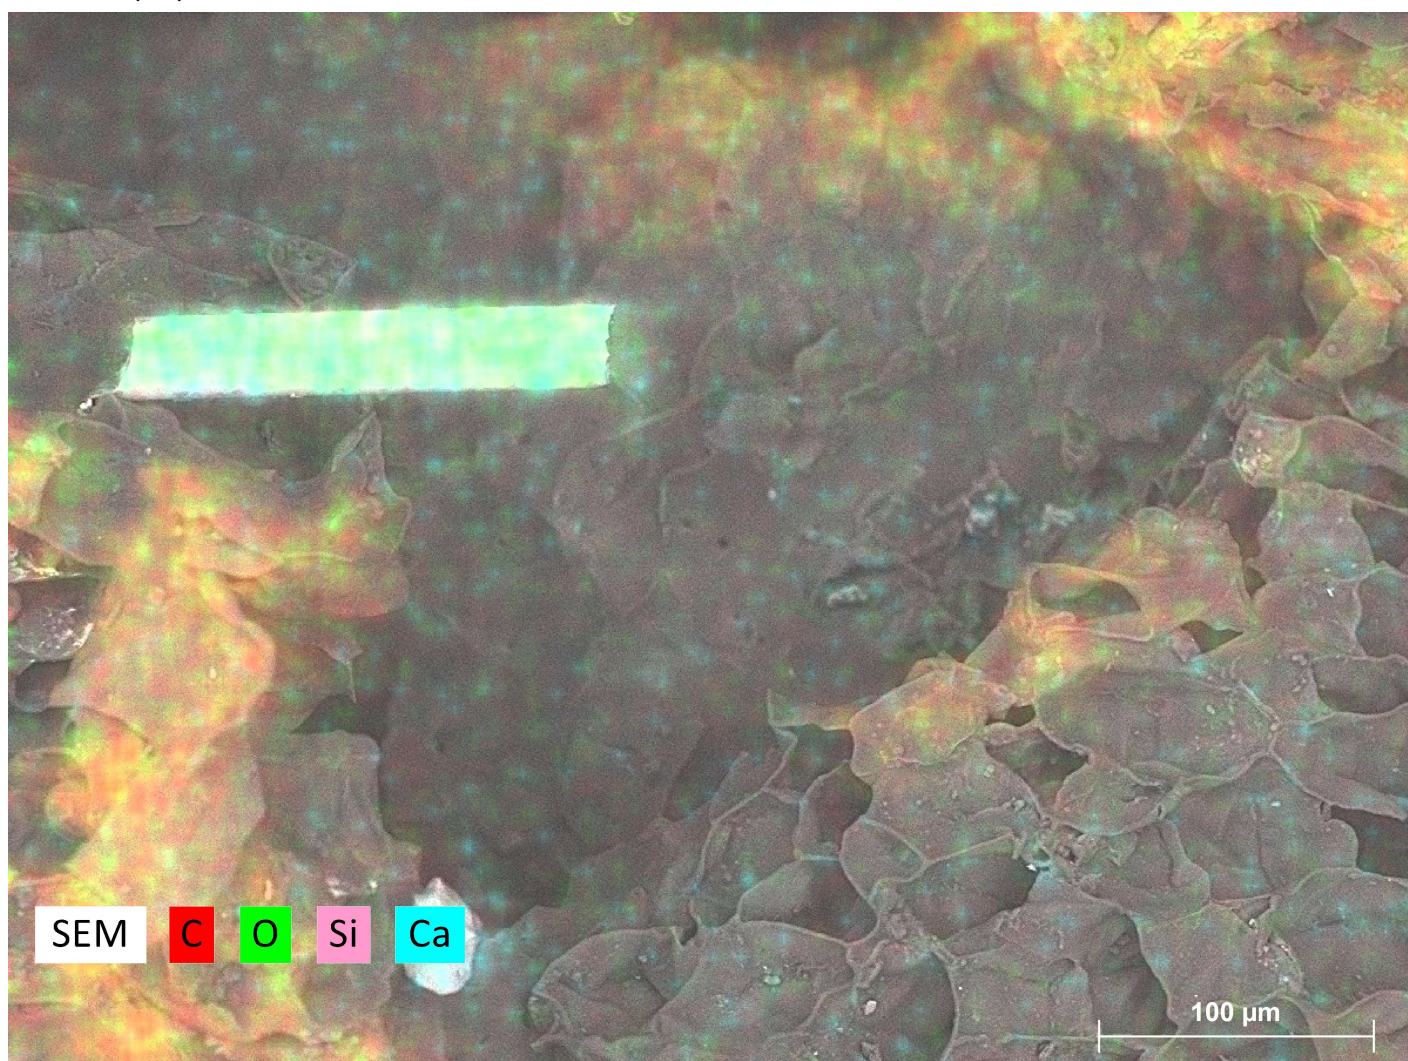

| Name | Date       | Time     | HV<br>[kV] | Mag  | WD<br>[mm] |
|------|------------|----------|------------|------|------------|
| 2275 | 20/07/2022 | 15:46:42 | 10.0 keV   | 300x | 11.3 mm    |



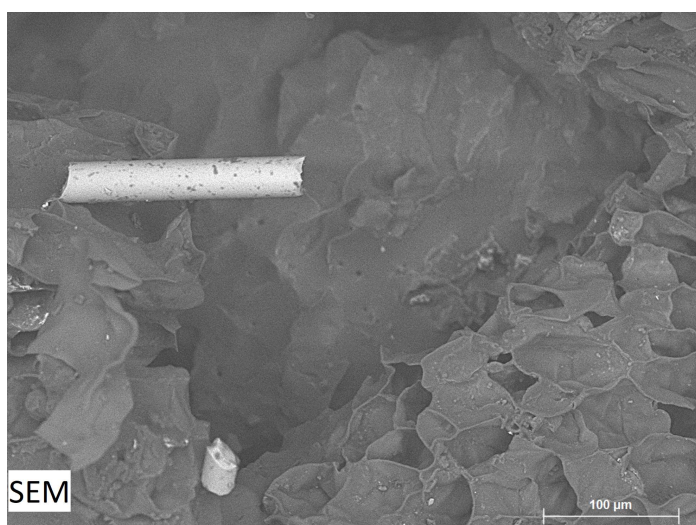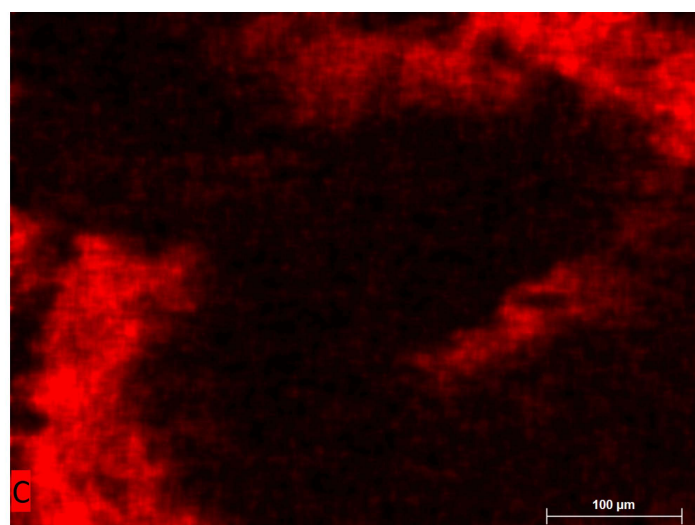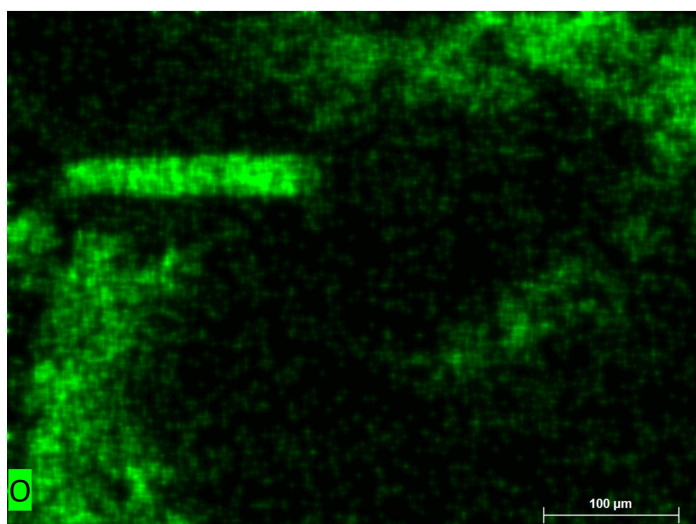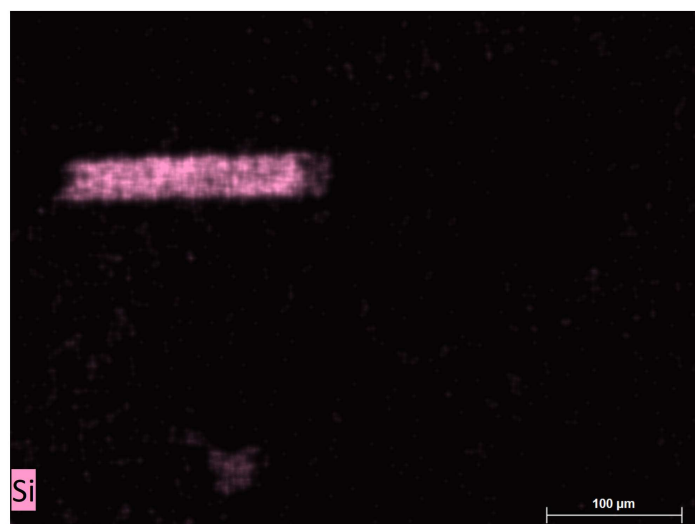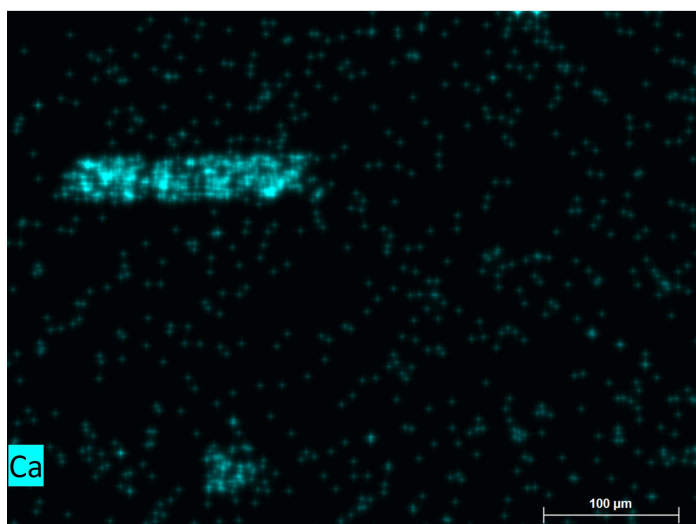

# Application Note

Company / Department

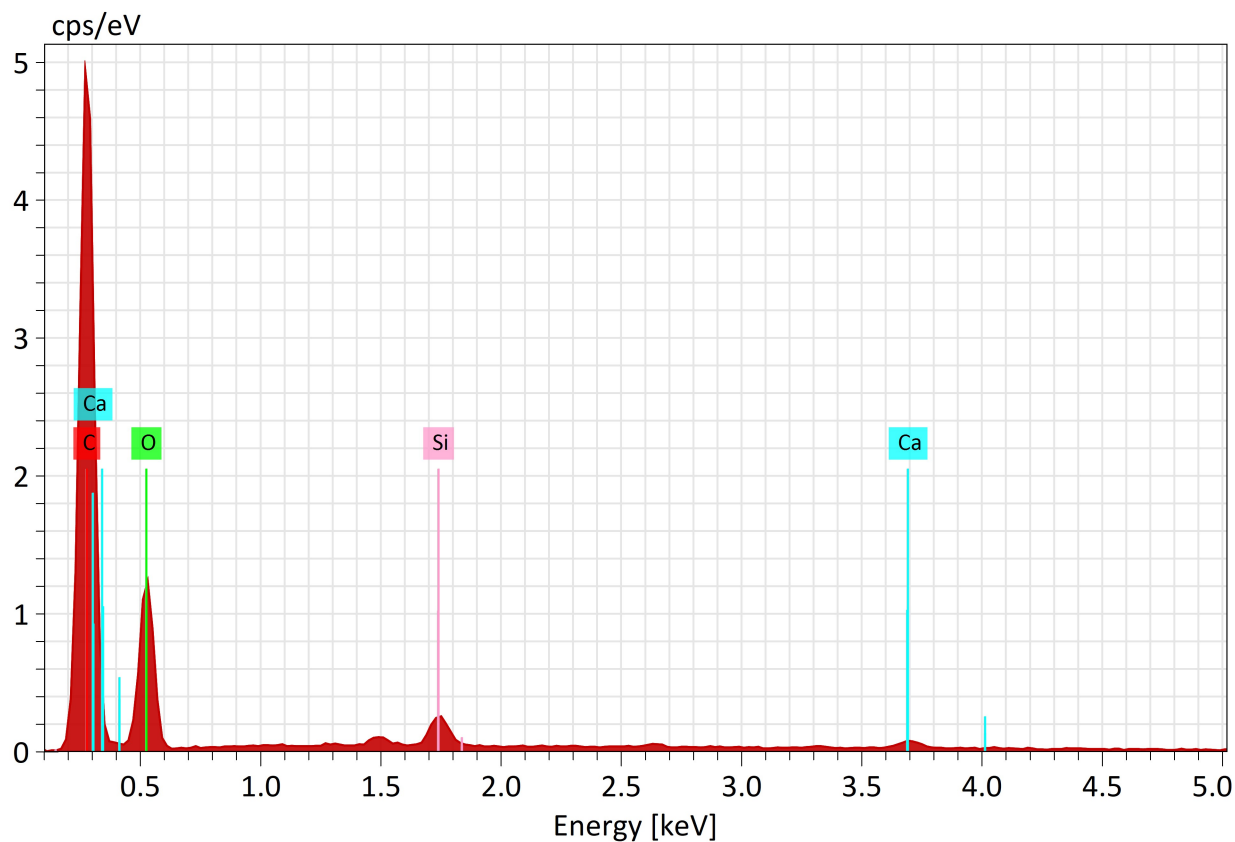

## Map

| Element | At. No. | Netto      | Mass [%]      | Mass Norm. [%] | Atom [%]      | abs. error [%]<br>(1 sigma) | rel. error [%]<br>(1 sigma) |
|---------|---------|------------|---------------|----------------|---------------|-----------------------------|-----------------------------|
| C       | 6       | 34377      | 70.78         | 70.78          | 77.10         | 2.80                        | 3.96                        |
| O       | 8       | 9002       | 26.68         | 26.68          | 21.82         | 1.28                        | 4.79                        |
| Si      | 14      | 2099       | 1.77          | 1.77           | 0.82          | 0.11                        | 6.45                        |
| Ca      | 20      | 661        | 0.77          | 0.77           | 0.25          | 0.06                        | 8.40                        |
|         |         | <b>Sum</b> | <b>100.00</b> | <b>100.00</b>  | <b>100.00</b> |                             |                             |

# Application Note

Company / Department

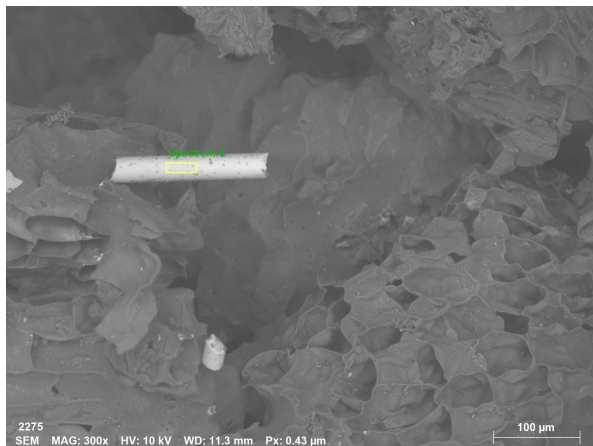

| Name | Date       | Time     | HV<br>[kV] | Mag  | WD<br>[mm] |
|------|------------|----------|------------|------|------------|
| 2275 | 20/07/2022 | 15:45:59 | 10.0 keV   | 300x | 11.3 mm    |

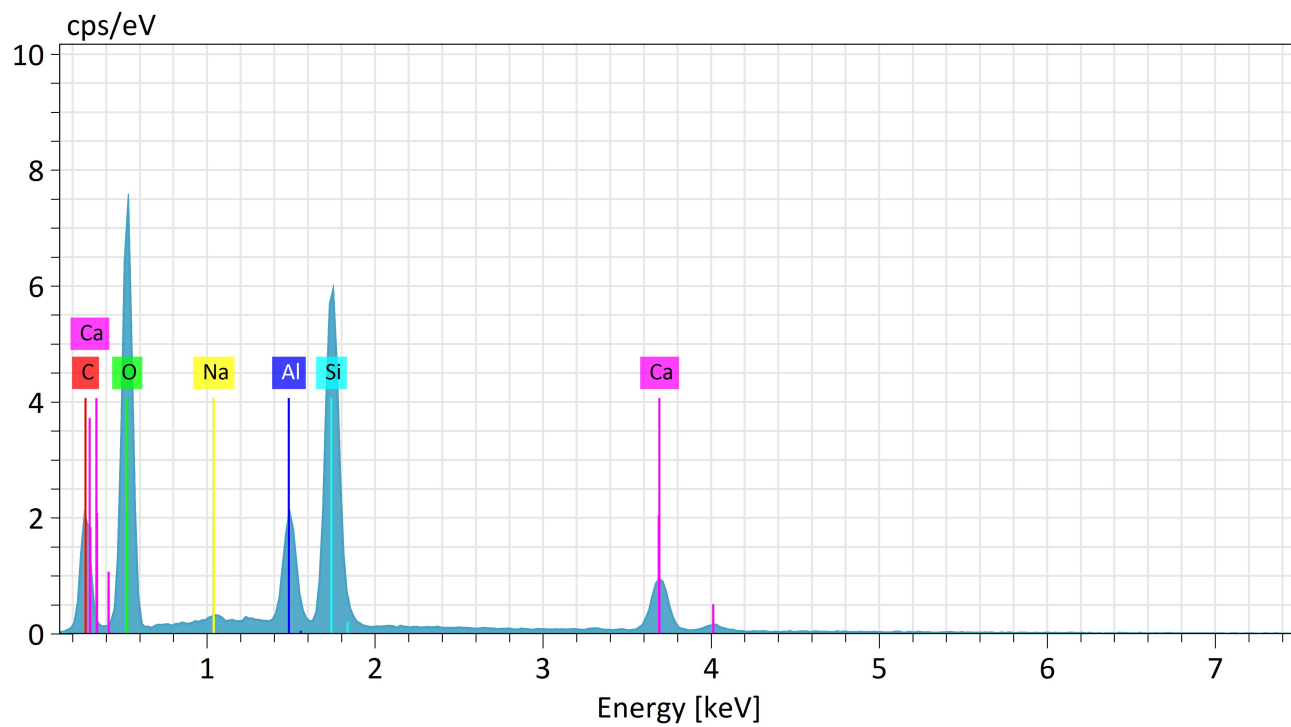

Spectrum  
Spectrum 1

# Application Note

Company / Department

Spectrum 1

| Element | At. No. | Netto      | Mass [%]      | Mass Norm. [%] | Atom [%]      | abs. error [%]<br>(1 sigma) | rel. error [%]<br>(1 sigma) |
|---------|---------|------------|---------------|----------------|---------------|-----------------------------|-----------------------------|
| O       | 8       | 30761      | 58.47         | 45.54          | 48.03         | 2.57                        | 4.39                        |
| C       | 6       | 7785       | 32.70         | 25.47          | 35.79         | 1.64                        | 5.01                        |
| Si      | 14      | 33042      | 21.74         | 16.93          | 10.17         | 0.98                        | 4.50                        |
| Ca      | 20      | 6927       | 9.89          | 7.70           | 3.24          | 0.50                        | 5.09                        |
| Al      | 13      | 9968       | 5.03          | 3.92           | 2.45          | 0.25                        | 4.98                        |
| Na      | 11      | 828        | 0.55          | 0.43           | 0.32          | 0.05                        | 9.77                        |
|         |         | <b>Sum</b> | <b>128.38</b> | <b>100.00</b>  | <b>100.00</b> |                             |                             |



# Application Note

Company / Department



| Name | Date       | Time     | HV<br>[kV] | Mag  | WD<br>[mm] |
|------|------------|----------|------------|------|------------|
| 2275 | 20/07/2022 | 15:45:59 | 10.0 keV   | 300x | 11.3 mm    |

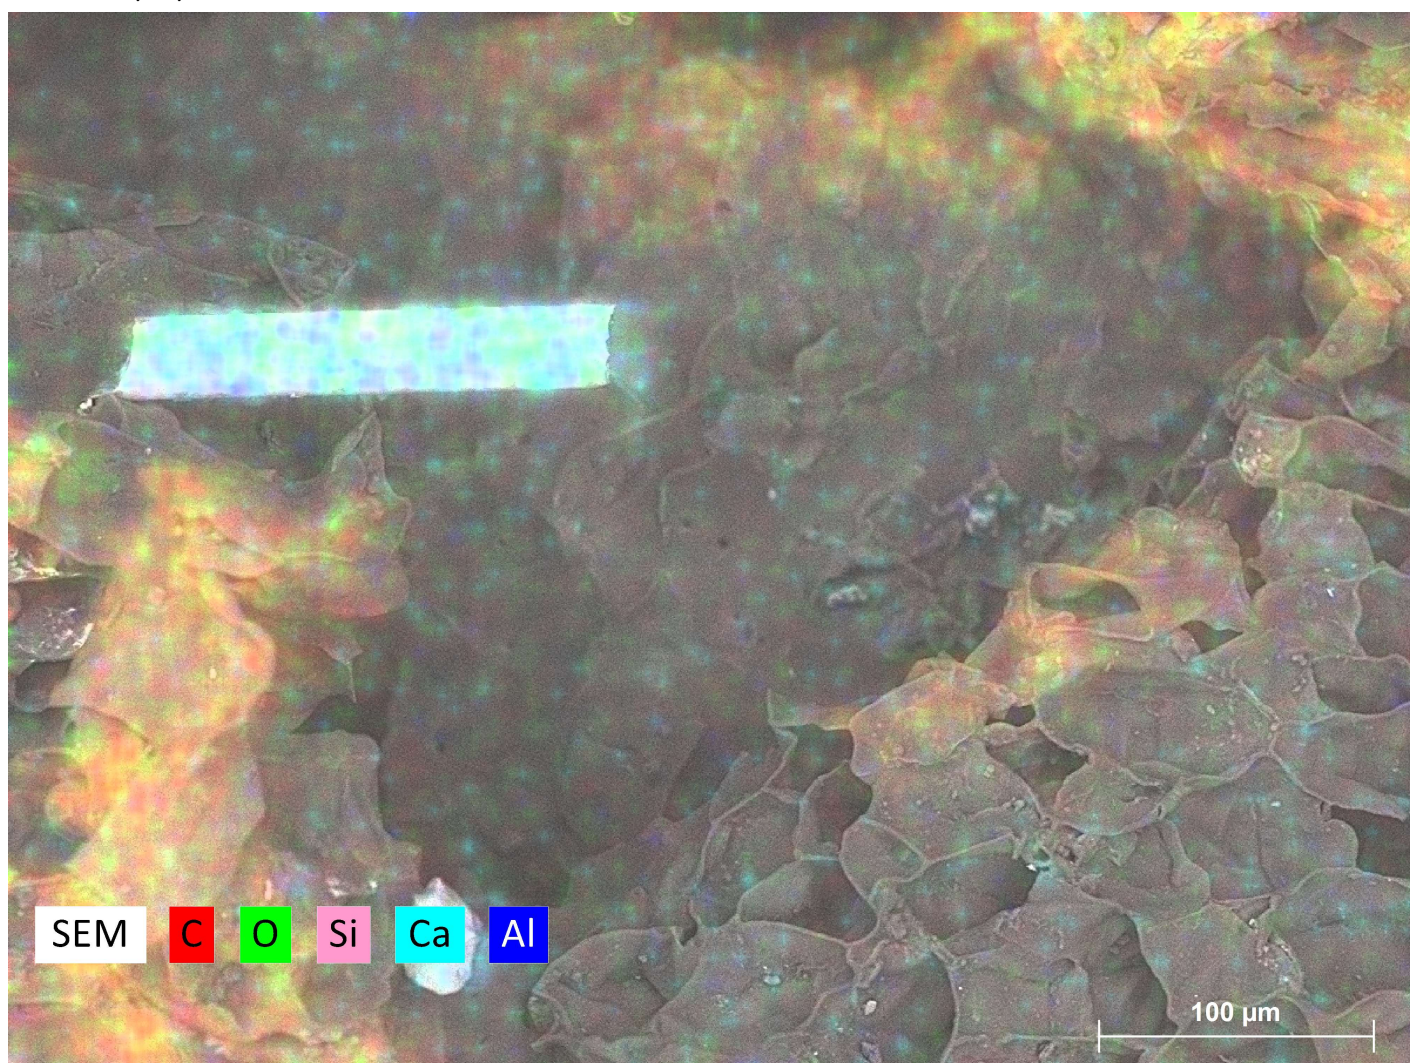

| Name | Date       | Time     | HV<br>[kV] | Mag  | WD<br>[mm] |
|------|------------|----------|------------|------|------------|
| 2275 | 20/07/2022 | 15:46:42 | 10.0 keV   | 300x | 11.3 mm    |



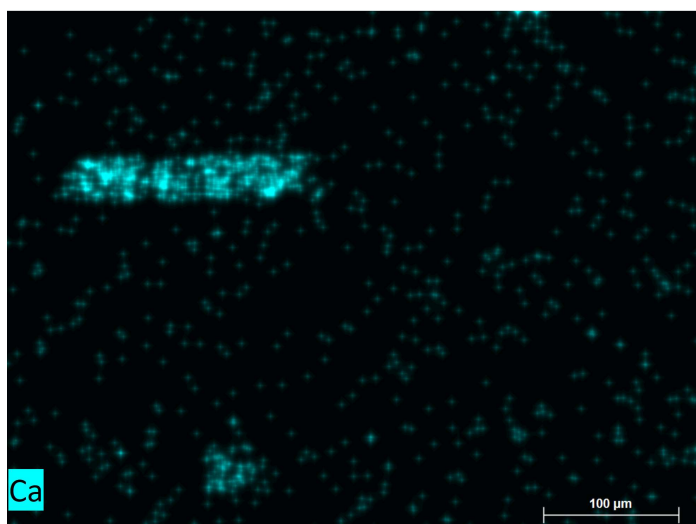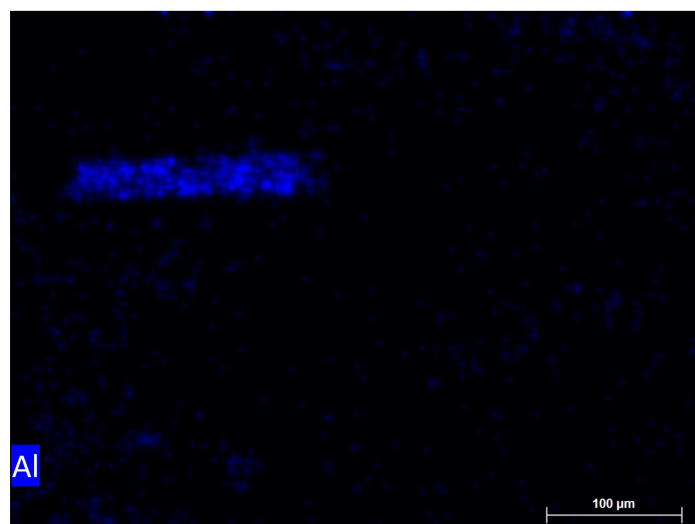

# Application Note

Company / Department

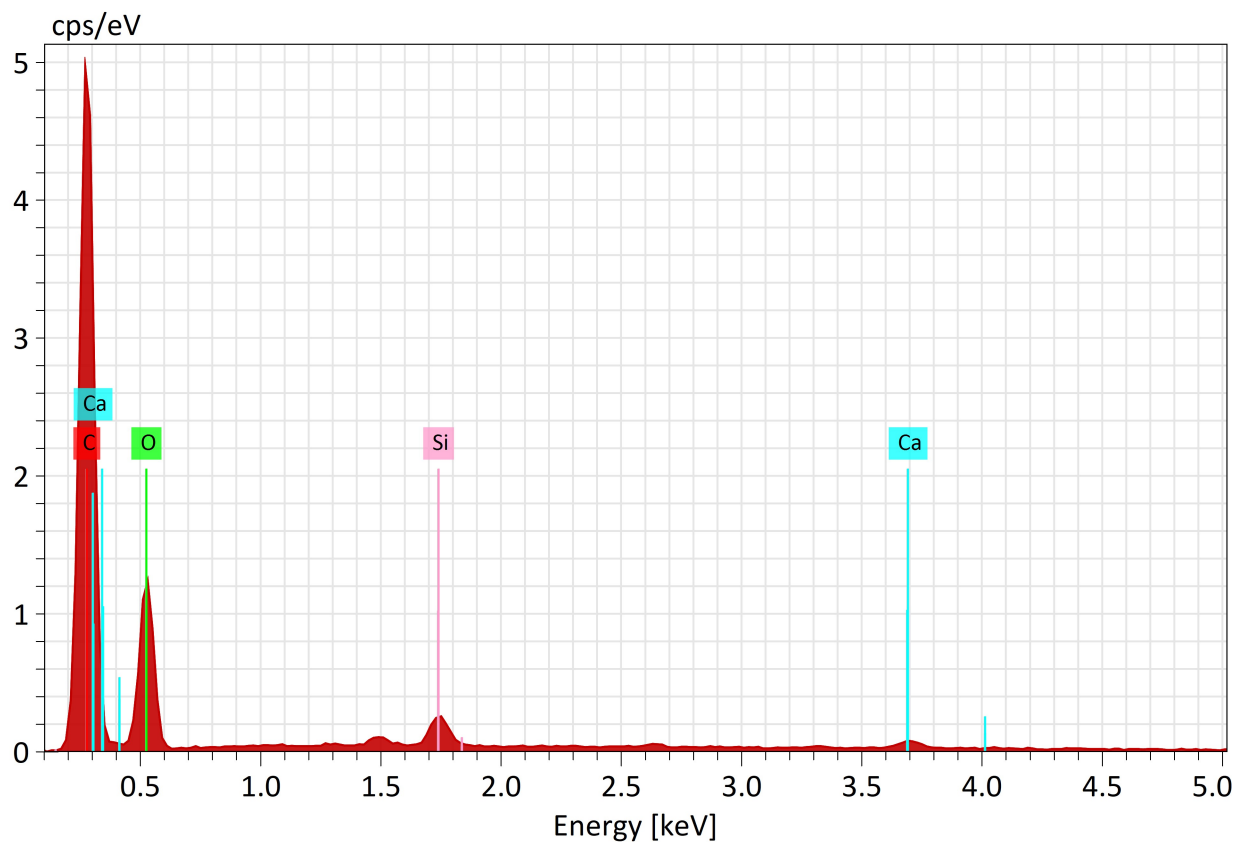

Map

| Element | At. No. | Netto      | Mass [%]      | Mass Norm. [%] | Atom [%]      | abs. error [%]<br>(1 sigma) | rel. error [%]<br>(1 sigma) |
|---------|---------|------------|---------------|----------------|---------------|-----------------------------|-----------------------------|
| C       | 6       | 34381      | 70.76         | 70.76          | 77.17         | 2.81                        | 3.97                        |
| O       | 8       | 9002       | 26.37         | 26.37          | 21.59         | 1.26                        | 4.79                        |
| Si      | 14      | 2080       | 1.72          | 1.72           | 0.80          | 0.11                        | 6.46                        |
| Ca      | 20      | 661        | 0.75          | 0.75           | 0.25          | 0.06                        | 8.39                        |
| Al      | 13      | 558        | 0.39          | 0.39           | 0.19          | 0.04                        | 9.68                        |
|         |         | <b>Sum</b> | <b>100.00</b> | <b>100.00</b>  | <b>100.00</b> |                             |                             |
