# Supplementary material for: Shear Thickening Fluids in Cork Agglomerates: An Exploration of Advantages and Drawbacks
Source: Preprints.org preprint supplement (doi:10.20944/preprints202304.0004.v1), 2023-04-03
Supplement: Supplementary file 6 [file CG_y_10.xlsx]

## Sheet: data
Time - Force (Bridge) - Force	Amplitude - Force (Bridge) - Force	data
0	-23	23		-1
4e-05	-11.38	11.38
8e-05	-21.18	21.18
0.00012	-16.24	16.24
0.00016	-7.451	7.451
0.0002	-8.376	8.376
0.00024	-13.14	13.14
0.00028	11.59	-11.59
0.00032	-27.22	27.22
0.00036	-19.85	19.85
0.0004	-14.79	14.79
0.00044	-20.05	20.05
0.00048	-18.32	18.32
0.00052	-7.856	7.856
0.00056	-13.29	13.29
0.0006	-2.163	2.163
0.00064	-27.74	27.74
0.00068	9.311	-9.311
0.00072	-16.04	16.04
0.00076	-14.62	14.62
0.0008	4.254	-4.254
0.00084	-5.428	5.428
0.00088	11.1	-11.1
0.00092	10.9	-10.9
0.00096	-1.44	1.44
0.001	15.87	-15.87
0.00104	-5.833	5.833
0.00108	1.71	-1.71
0.00112	-18.26	18.26
0.00116	1.277	-1.277
0.0012	26.85	-26.85
0.00124	-12.05	12.05
0.00128	1.017	-1.017
0.00132	22.92	-22.92
0.00136	2.375	-2.375
0.0014	727.6m	-0.7276
0.00144	-13.87	13.87
0.00148	-6.96	6.96
0.00152	-2.163	2.163
0.00156	-6.7	6.7
0.0016	1.161	-1.161
0.00164	-6.902	6.902
0.00168	6.103	-6.103
0.00172	1.161	-1.161
0.00176	-370.6m	0.3706
0.0018	-10.63	10.63
0.00184	9.658	-9.658
0.00188	2.404	-2.404
0.00192	16.33	-16.33
0.00196	-5.226	5.226
0.002	-8.029	8.029
0.00204	-18.78	18.78
0.00208	-2.423	2.423
0.00212	5.872	-5.872
0.00216	16.8	-16.8
0.0022	-17.19	17.19
0.00224	32.11	-32.11
0.00228	10.93	-10.93
0.00232	-14.76	14.76
0.00236	5.988	-5.988
0.0024	1.19	-1.19
0.00244	-6.093	6.093
0.00248	4.138	-4.138
0.00252	-6.989	6.989
0.00256	-16.76	16.76
0.0026	-5.11	5.11
0.00264	6.017	-6.017
0.00268	18.01	-18.01
0.00272	11.83	-11.83
0.00276	-7.972	7.972
0.0028	-4.648	4.648
0.00284	3.502	-3.502
0.00288	-3.203	3.203
0.00292	6.912	-6.912
0.00296	-7.683	7.683
0.003	-13.58	13.58
0.00304	1.19	-1.19
0.00308	7.028	-7.028
0.00312	-4.735	4.735
0.00316	16.74	-16.74
0.0032	7.462	-7.462
0.00324	11.31	-11.31
0.00328	5.149	-5.149
0.00332	-10.51	10.51
0.00336	7.433	-7.433
0.0034	5.728	-5.728
0.00344	4.167	-4.167
0.00348	16.85	-16.85
0.00352	-17.25	17.25
0.00356	-17.45	17.45
0.0036	4.918	-4.918
0.00364	-3.925	3.925
0.00368	-1.931	1.931
0.00372	-5.342	5.342
0.00376	8.358	-8.358
0.0038	13.39	-13.39
0.00384	9.311	-9.311
0.00388	-7.798	7.798
0.00392	2.057	-2.057
0.00396	7.201	-7.201
0.004	-4.475	4.475
0.00404	25.9	-25.9
0.00408	14.02	-14.02
0.00412	-8.318	8.318
0.00416	1.855	-1.855
0.0042	13.47	-13.47
0.00424	5.699	-5.699
0.00428	9.889	-9.889
0.00432	8.126	-8.126
0.00436	-2.741	2.741
0.0044	5.41	-5.41
0.00444	-1.527	1.527
0.00448	2.404	-2.404
0.00452	3.993	-3.993
0.00456	-6.18	6.18
0.0046	7.866	-7.866
0.00464	-3.434	3.434
0.00468	2.144	-2.144
0.00472	-3.636	3.636
0.00476	16.8	-16.8
0.0048	17.72	-17.72
0.00484	7.404	-7.404
0.00488	8.531	-8.531
0.00492	6.19	-6.19
0.00496	-1.44	1.44
0.005	-4.475	4.475
0.00504	-7.972	7.972
0.00508	5.149	-5.149
0.00512	10.24	-10.24
0.00516	-7.365	7.365
0.0052	6.71	-6.71
0.00524	8.56	-8.56
0.00528	-12.02	12.02
0.00532	785.4m	-0.7854
0.00536	10.06	-10.06
0.0054	-12.45	12.45
0.00544	-14.85	14.85
0.00548	1.508	-1.508
0.00552	-9.33	9.33
0.00556	11.05	-11.05
0.0056	-2.423	2.423
0.00564	-1.584	1.584
0.00568	9.947	-9.947
0.00572	6.045	-6.045
0.00576	5.699	-5.699
0.0058	-10.89	10.89
0.00584	18.85	-18.85
0.00588	6.277	-6.277
0.00592	10.55	-10.55
0.00596	9.167	-9.167
0.006	5.352	-5.352
0.00604	7.433	-7.433
0.00608	15.41	-15.41
0.00612	-3.174	3.174
0.00616	-3.55	3.55
0.0062	-486.2m	0.4862
0.00624	-13.9	13.9
0.00628	2.491	-2.491
0.00632	3.213	-3.213
0.00636	-4.966	4.966
0.0064	20.78	-20.78
0.00644	-3.319	3.319
0.00648	6.97	-6.97
0.00652	8.184	-8.184
0.00656	-4.504	4.504
0.0066	1.913	-1.913
0.00664	-2.943	2.943
0.00668	14.05	-14.05
0.00672	8.386	-8.386
0.00676	-3.868	3.868
0.0068	-7.538	7.538
0.00684	12.06	-12.06
0.00688	2.375	-2.375
0.00692	2.693	-2.693
0.00696	15.06	-15.06
0.007	-2.105	2.105
0.00704	15.52	-15.52
0.00708	2.317	-2.317
0.00712	2.808	-2.808
0.00716	-15.95	15.95
0.0072	11.33	-11.33
0.00724	-1.469	1.469
0.00728	10.24	-10.24
0.00732	32.29	-32.29
0.00736	29.95	-29.95
0.0074	30.32	-30.32
0.00744	44.77	-44.77
0.00748	69.43	-69.43
0.00752	57.55	-57.55
0.00756	2.548	-2.548
0.0076	16.42	-16.42
0.00764	63.27	-63.27
0.00768	28.79	-28.79
0.00772	36.97	-36.97
0.00776	77.26	-77.26
0.0078	8.386	-8.386
0.00784	36.19	-36.19
0.00788	46.94	-46.94
0.00792	67.4	-67.4
0.00796	39.2	-39.2
0.008	18.04	-18.04
0.00804	65.26	-65.26
0.00808	30.61	-30.61
0.00812	28.94	-28.94
0.00816	25.78	-25.78
0.0082	79.54	-79.54
0.00824	83.44	-83.44
0.00828	29.17	-29.17
0.00832	9.022	-9.022
0.00836	15.32	-15.32
0.0084	68.5	-68.5
0.00844	82.08	-82.08
0.00848	37.58	-37.58
0.00852	13.79	-13.79
0.00856	12.63	-12.63
0.0086	28.82	-28.82
0.00864	30.03	-30.03
0.00868	19.4	-19.4
0.00872	64.02	-64.02
0.00876	52.89	-52.89
0.0088	57.43	-57.43
0.00884	54.54	-54.54
0.00888	31.74	-31.74
0.00892	22.23	-22.23
0.00896	54.77	-54.77
0.009	79.37	-79.37
0.00904	69.31	-69.31
0.00908	29.83	-29.83
0.00912	16.85	-16.85
0.00916	53.67	-53.67
0.0092	52.06	-52.06
0.00924	61.3	-61.3
0.00928	26.02	-26.02
0.00932	6.71	-6.71
0.00936	20.03	-20.03
0.0094	23.62	-23.62
0.00944	46.28	-46.28
0.00948	34.89	-34.89
0.00952	-2.596	2.596
0.00956	28.39	-28.39
0.0096	41.59	-41.59
0.00964	37.87	-37.87
0.00968	33.07	-33.07
0.00972	37.72	-37.72
0.00976	35.84	-35.84
0.0098	40.99	-40.99
0.00984	55.81	-55.81
0.00988	24.2	-24.2
0.00992	43.76	-43.76
0.00996	38.47	-38.47
0.01	37.29	-37.29
0.01004	49.54	-49.54
0.01008	24.37	-24.37
0.01012	16.57	-16.57
0.01016	756.5m	-0.7565
0.0102	13.99	-13.99
0.01024	8.097	-8.097
0.01028	30.67	-30.67
0.01032	33.41	-33.41
0.01036	20.21	-20.21
0.0104	-1.382	1.382
0.01044	27.55	-27.55
0.01048	32.55	-32.55
0.01052	27.58	-27.58
0.01056	58.62	-58.62
0.0106	18.96	-18.96
0.01064	30.87	-30.87
0.01068	14.11	-14.11
0.01072	7.548	-7.548
0.01076	1.941	-1.941
0.0108	10.53	-10.53
0.01084	22.23	-22.23
0.01088	20.81	-20.81
0.01092	27.46	-27.46
0.01096	19.4	-19.4
0.011	15.38	-15.38
0.01104	33.56	-33.56
0.01108	-5.255	5.255
0.01112	15.55	-15.55
0.01116	16.19	-16.19
0.0112	16.31	-16.31
0.01124	-2.48	2.48
0.01128	18.3	-18.3
0.01132	17.95	-17.95
0.01136	39.54	-39.54
0.0114	21.8	-21.8
0.01144	15.03	-15.03
0.01148	28.62	-28.62
0.01152	10.64	-10.64
0.01156	20.55	-20.55
0.0116	13.88	-13.88
0.01164	5.496	-5.496
0.01168	10.29	-10.29
0.01172	-9.475	9.475
0.01176	4.832	-4.832
0.0118	351.9m	-0.3519
0.01184	3.704	-3.704
0.01188	14.11	-14.11
0.01192	-6.382	6.382
0.01196	294.1m	-0.2941
0.012	11.65	-11.65
0.01204	-11.47	11.47
0.01208	17.49	-17.49
0.01212	28.82	-28.82
0.01216	-17.28	17.28
0.0122	-1.18	1.18
0.01224	5.063	-5.063
0.01228	13.13	-13.13
0.01232	6.508	-6.508
0.01236	2.346	-2.346
0.0124	11.8	-11.8
0.01244	-12.74	12.74
0.01248	14.4	-14.4
0.01252	30.93	-30.93
0.01256	28.76	-28.76
0.0126	13.27	-13.27
0.01264	62.88m	-0.06288
0.01268	3.907	-3.907
0.01272	-14.68	14.68
0.01276	14.46	-14.46
0.0128	-15.98	15.98
0.01284	-7.769	7.769
0.01288	-2.365	2.365
0.01292	14.46	-14.46
0.01296	6.219	-6.219
0.013	-833.1m	0.8331
0.01304	-3.463	3.463
0.01308	9.542	-9.542
0.01312	26.71	-26.71
0.01316	-4.59	4.59
0.0132	-16.79	16.79
0.01324	14.34	-14.34
0.01328	13.18	-13.18
0.01332	12.37	-12.37
0.01336	-4.735	4.735
0.0134	-4.561	4.561
0.01344	2.577	-2.577
0.01348	1.277	-1.277
0.01352	-6.7	6.7
0.01356	20.21	-20.21
0.0136	-2.018	2.018
0.01364	18.27	-18.27
0.01368	2.173	-2.173
0.01372	7.346	-7.346
0.01376	12.23	-12.23
0.0138	-17.31	17.31
0.01384	-7.596	7.596
0.01388	3.733	-3.733
0.01392	-1.18	1.18
0.01396	1.913	-1.913
0.014	8.358	-8.358
0.01404	-6.902	6.902
0.01408	2.057	-2.057
0.01412	6.421	-6.421
0.01416	9.225	-9.225
0.0142	-24.1	24.1
0.01424	-7.856	7.856
0.01428	-7.538	7.538
0.01432	-17.54	17.54
0.01436	-10.46	10.46
0.0144	5.265	-5.265
0.01444	-862m	0.862
0.01448	-15.69	15.69
0.01452	-1.469	1.469
0.01456	-12.97	12.97
0.0146	-6.353	6.353
0.01464	18.62	-18.62
0.01468	18.01	-18.01
0.01472	-3.839	3.839
0.01476	2.953	-2.953
0.0148	-601.9m	0.6019
0.01484	1.479	-1.479
0.01488	-21.76	21.76
0.01492	4.398	-4.398
0.01496	62.88m	-0.06288
0.015	5.121	-5.121
0.01504	1.537	-1.537
0.01508	2.751	-2.751
0.01512	-21.79	21.79
0.01516	10.41	-10.41
0.0152	-1.7	1.7
0.01524	-16.09	16.09
0.01528	-7.567	7.567
0.01532	-4.243	4.243
0.01536	-8.145	8.145
0.0154	-6.353	6.353
0.01544	-14.45	14.45
0.01548	14.89	-14.89
0.01552	-6.266	6.266
0.01556	-5.746	5.746
0.0156	4.369	-4.369
0.01564	-6.151	6.151
0.01568	9.311	-9.311
0.01572	8.126	-8.126
0.01576	3.069	-3.069
0.0158	-2.567	2.567
0.01584	-7.74	7.74
0.01588	-7.625	7.625
0.01592	-601.9m	0.6019
0.01596	3.011	-3.011
0.016	-7.423	7.423
0.01604	-5.688	5.688
0.01608	17.29	-17.29
0.01612	-9.475	9.475
0.01616	-13.78	13.78
0.0162	9.947	-9.947
0.01624	-9.821	9.821
0.01628	-13.26	13.26
0.01632	4.86	-4.86
0.01636	3.589	-3.589
0.0164	14.37	-14.37
0.01644	-11.18	11.18
0.01648	7.173	-7.173
0.01652	5.294	-5.294
0.01656	-6.035	6.035
0.0166	843.2m	-0.8432
0.01664	-16.01	16.01
0.01668	-2.018	2.018
0.01672	10.96	-10.96
0.01676	-13.38	13.38
0.0168	178.5m	-0.1785
0.01684	2.202	-2.202
0.01688	-9.33	9.33
0.01692	-1.006	1.006
0.01696	-13.2	13.2
0.017	-6.671	6.671
0.01704	9.889	-9.889
0.01708	7.317	-7.317
0.01712	-283.9m	0.2839
0.01716	-8.781	8.781
0.0172	25.55	-25.55
0.01724	-8.607	8.607
0.01728	-1.006	1.006
0.01732	-37.62	37.62
0.01736	-15.75	15.75
0.0174	-11.27	11.27
0.01744	-16.73	16.73
0.01748	-47.71	47.71
0.01752	-46.15	46.15
0.01756	-1.556	1.556
0.0176	-23.26	23.26
0.01764	-72.07	72.07
0.01768	-27.39	27.39
0.01772	-9.561	9.561
0.01776	-39.88	39.88
0.0178	-32.39	32.39
0.01784	-38.38	38.38
0.01788	-48.4	48.4
0.01792	-28.14	28.14
0.01796	-53.84	53.84
0.018	-27.88	27.88
0.01804	-17.86	17.86
0.01808	-26.96	26.96
0.01812	-48.29	48.29
0.01816	-49.21	49.21
0.0182	-17.08	17.08
0.01824	-25.57	25.57
0.01828	-14.56	14.56
0.01832	-37.91	37.91
0.01836	-44.73	44.73
0.0184	-36.58	36.58
0.01844	-55.49	55.49
0.01848	-17.08	17.08
0.01852	-26.93	26.93
0.01856	-9.099	9.099
0.0186	-23.55	23.55
0.01864	-26.41	26.41
0.01868	-9.359	9.359
0.01872	-29.53	29.53
0.01876	-18.14	18.14
0.0188	-40.02	40.02
0.01884	-11.01	11.01
0.01888	-26.99	26.99
0.01892	-21.24	21.24
0.01896	-31.01	31.01
0.019	612m	-0.612
0.01904	-21.3	21.3
0.01908	16.62	-16.62
0.01912	-2.22	2.22
0.01916	-19.27	19.27
0.0192	5.988	-5.988
0.01924	-35.6	35.6
0.01928	-15.05	15.05
0.01932	-75.31	75.31
0.01936	-13.93	13.93
0.0194	8.647	-8.647
0.01944	-17.71	17.71
0.01948	-16.96	16.96
0.01952	-19.42	19.42
0.01956	-28.75	28.75
0.0196	-4.908	4.908
0.01964	-1.758	1.758
0.01968	-6.931	6.931
0.01972	-20.37	20.37
0.01976	-15.43	15.43
0.0198	-39.91	39.91
0.01984	-3.608	3.608
0.01988	-1.845	1.845
0.01992	-8.001	8.001
0.01996	-3.203	3.203
0.02	-31.55	31.55
0.02004	-34.73	34.73
0.02008	-33.09	33.09
0.02012	-4.706	4.706
0.02016	-19.33	19.33
0.0202	6.566	-6.566
0.02024	10.73	-10.73
0.02028	-1.295	1.295
0.02032	-18.17	18.17
0.02036	9.976	-9.976
0.0204	-10.83	10.83
0.02044	-18.64	18.64
0.02048	-33.09	33.09
0.02052	-12.25	12.25
0.02056	-27.19	27.19
0.0206	-11.56	11.56
0.02064	-13.03	13.03
0.02068	10.38	-10.38
0.02072	-7.423	7.423
0.02076	-7.134	7.134
0.0208	-28.64	28.64
0.02084	-30.02	30.02
0.02088	-2.509	2.509
0.02092	-21.5	21.5
0.02096	14.17	-14.17
0.021	11.51	-11.51
0.02104	-10.31	10.31
0.02108	18.65	-18.65
0.02112	-6.758	6.758
0.02116	2.173	-2.173
0.0212	-1.006	1.006
0.02124	-10.4	10.4
0.02128	-5.949	5.949
0.02132	-20.31	20.31
0.02136	5.121	-5.121
0.0214	-7.914	7.914
0.02144	-29.65	29.65
0.02148	-22.05	22.05
0.02152	-13.2	13.2
0.02156	-6.44	6.44
0.0216	-7.047	7.047
0.02164	-16.76	16.76
0.02168	4.716	-4.716
0.02172	9.109	-9.109
0.02176	5.525	-5.525
0.0218	-11.15	11.15
0.02184	351.9m	-0.3519
0.02188	8.56	-8.56
0.02192	13.73	-13.73
0.02196	4.225	-4.225
0.022	17.26	-17.26
0.02204	-10.11	10.11
0.02208	-9.59	9.59
0.02212	-12.25	12.25
0.02216	-14.91	14.91
0.0222	-6.035	6.035
0.02224	-24.21	24.21
0.02228	4.6	-4.6
0.02232	-23.72	23.72
0.02236	3.3	-3.3
0.0224	13.76	-13.76
0.02244	-688.6m	0.6886
0.02248	14.72	-14.72
0.02252	10.26	-10.26
0.02256	26.36	-26.36
0.0226	9.167	-9.167
0.02264	351.9m	-0.3519
0.02268	-7.769	7.769
0.02272	-4.966	4.966
0.02276	7.144	-7.144
0.0228	-5.544	5.544
0.02284	-23.38	23.38
0.02288	-15.86	15.86
0.02292	9.716	-9.716
0.02296	583.1m	-0.5831
0.023	16.8	-16.8
0.02304	12.61	-12.61
0.02308	24.54	-24.54
0.02312	13.04	-13.04
0.02316	4.571	-4.571
0.0232	12.84	-12.84
0.02324	-16.32	16.32
0.02328	12.23	-12.23
0.02332	-2.885	2.885
0.02336	-7.798	7.798
0.0234	-10.66	10.66
0.02344	-6.787	6.787
0.02348	-486.2m	0.4862
0.02352	2.23	-2.23
0.02356	698.7m	-0.6987
0.0236	17.81	-17.81
0.02364	9.774	-9.774
0.02368	15.55	-15.55
0.02372	2.548	-2.548
0.02376	7.404	-7.404
0.0238	-52.73m	0.05273
0.02384	8.126	-8.126
0.02388	5.67	-5.67
0.02392	10	-10
0.02396	-5.602	5.602
0.024	-4.359	4.359
0.02404	4.109	-4.109
0.02408	13.47	-13.47
0.02412	16.51	-16.51
0.02416	583.1m	-0.5831
0.0242	-11.87	11.87
0.02424	2.491	-2.491
0.02428	12.84	-12.84
0.02432	7.924	-7.924
0.02436	14.54	-14.54
0.0244	10.79	-10.79
0.02444	10.7	-10.7
0.02448	-2.163	2.163
0.02452	8.878	-8.878
0.02456	-9.619	9.619
0.0246	6.103	-6.103
0.02464	4.282	-4.282
0.02468	7.173	-7.173
0.02472	-18.95	18.95
0.02476	-12.71	12.71
0.0248	323m	-0.323
0.02484	-15.77	15.77
0.02488	5.149	-5.149
0.02492	29.34	-29.34
0.02496	10.9	-10.9
0.025	8.126	-8.126
0.02504	-2.018	2.018
0.02508	11.1	-11.1
0.02512	6.132	-6.132
0.02516	-226.1m	0.2261
0.0252	19.54	-19.54
0.02524	6.652	-6.652
0.02528	3.155	-3.155
0.02532	91.78m	-0.09178
0.02536	-2.798	2.798
0.0254	3.704	-3.704
0.02544	-8.434	8.434
0.02548	17.69	-17.69
0.02552	-3.897	3.897
0.02556	-4.272	4.272
0.0256	10.64	-10.64
0.02564	8.415	-8.415
0.02568	3.965	-3.965
0.02572	13.36	-13.36
0.02576	-6.44	6.44
0.0258	9.831	-9.831
0.02584	-9.85	9.85
0.02588	12.2	-12.2
0.02592	1.392	-1.392
0.02596	-2.885	2.885
0.026	3.097	-3.097
0.02604	-3.087	3.087
0.02608	-2.163	2.163
0.02612	-16.58	16.58
0.02616	2.23	-2.23
0.0262	19.17	-19.17
0.02624	5.843	-5.843
0.02628	17.75	-17.75
0.02632	3.56	-3.56
0.02636	1.537	-1.537
0.0264	9.803	-9.803
0.02644	-4.764	4.764
0.02648	14.95	-14.95
0.02652	9.571	-9.571
0.02656	8.993	-8.993
0.0266	-2.018	2.018
0.02664	12.09	-12.09
0.02668	5.583	-5.583
0.02672	-26.99	26.99
0.02676	2.693	-2.693
0.0268	120.7m	-0.1207
0.02684	3.011	-3.011
0.02688	-3.868	3.868
0.02692	15.41	-15.41
0.02696	9.658	-9.658
0.027	7.635	-7.635
0.02704	-1.44	1.44
0.02708	19.57	-19.57
0.02712	13.59	-13.59
0.02716	-5.342	5.342
0.0272	929.9m	-0.9299
0.02724	7.577	-7.577
0.02728	10.76	-10.76
0.02732	30.47	-30.47
0.02736	74.14	-74.14
0.0274	7.433	-7.433
0.02744	19.4	-19.4
0.02748	57.75	-57.75
0.02752	39.66	-39.66
0.02756	6.277	-6.277
0.0276	42.11	-42.11
0.02764	67.34	-67.34
0.02768	64.11	-64.11
0.02772	22.61	-22.61
0.02776	-12.45	12.45
0.0278	20.58	-20.58
0.02784	63.5	-63.5
0.02788	55.58	-55.58
0.02792	30.35	-30.35
0.02796	53.21	-53.21
0.028	60.99	-60.99
0.02804	54.89	-54.89
0.02808	-255m	0.255
0.02812	44.72	-44.72
0.02816	70.06	-70.06
0.0282	61.22	-61.22
0.02824	43.96	-43.96
0.02828	8.907	-8.907
0.02832	33.99	-33.99
0.02836	41.94	-41.94
0.0284	66.59	-66.59
0.02844	7.924	-7.924
0.02848	32	-32
0.02852	48.73	-48.73
0.02856	49.48	-49.48
0.0286	27.72	-27.72
0.02864	27.92	-27.92
0.02868	50.52	-50.52
0.02872	62.87	-62.87
0.02876	55.58	-55.58
0.0288	60.78	-60.78
0.02884	23.3	-23.3
0.02888	14.02	-14.02
0.02892	32.52	-32.52
0.02896	29.08	-29.08
0.029	60.7	-60.7
0.02904	5.294	-5.294
0.02908	6.739	-6.739
0.02912	29.11	-29.11
0.02916	27.72	-27.72
0.0292	26.83	-26.83
0.02924	14.43	-14.43
0.02928	24.86	-24.86
0.02932	9.311	-9.311
0.02936	47.66	-47.66
0.0294	29.98	-29.98
0.02944	45.47	-45.47
0.02948	55.76	-55.76
0.02952	43.36	-43.36
0.02956	53.85	-53.85
0.0296	-15.25	15.25
0.02964	18.27	-18.27
0.02968	27.87	-27.87
0.02972	32.11	-32.11
0.02976	65.18	-65.18
0.0298	33.24	-33.24
0.02984	38.3	-38.3
0.02988	52.78	-52.78
0.02992	26.74	-26.74
0.02996	22.26	-22.26
0.03	26.88	-26.88
0.03004	49.57	-49.57
0.03008	32.78	-32.78
0.03012	25.7	-25.7
0.03016	22.17	-22.17
0.0302	-12.88	12.88
0.03024	39.51	-39.51
0.03028	42.52	-42.52
0.03032	19.98	-19.98
0.03036	32.95	-32.95
0.0304	22	-22
0.03044	42.89	-42.89
0.03048	756.5m	-0.7565
0.03052	52.78	-52.78
0.03056	31.54	-31.54
0.0306	2.404	-2.404
0.03064	29.4	-29.4
0.03068	8.907	-8.907
0.03072	38.39	-38.39
0.03076	32.11	-32.11
0.0308	15.18	-15.18
0.03084	-6.151	6.151
0.03088	6.855	-6.855
0.03092	7.057	-7.057
0.03096	15.18	-15.18
0.031	14.25	-14.25
0.03104	44.43	-44.43
0.03108	24.8	-24.8
0.03112	2.317	-2.317
0.03116	23.85	-23.85
0.0312	27.03	-27.03
0.03124	34.31	-34.31
0.03128	23.36	-23.36
0.03132	14.69	-14.69
0.03136	-168.3m	0.1683
0.0314	24.92	-24.92
0.03144	31.85	-31.85
0.03148	22.95	-22.95
0.03152	-2.047	2.047
0.03156	13.07	-13.07
0.0316	9.6	-9.6
0.03164	2.953	-2.953
0.03168	8.386	-8.386
0.03172	7.49	-7.49
0.03176	10.18	-10.18
0.0318	-2.48	2.48
0.03184	-1.931	1.931
0.03188	6.508	-6.508
0.03192	-52.73m	0.05273
0.03196	26.16	-26.16
0.032	4.485	-4.485
0.03204	14.31	-14.31
0.03208	3.069	-3.069
0.03212	11.36	-11.36
0.03216	12.98	-12.98
0.0322	13.18	-13.18
0.03224	2.173	-2.173
0.03228	27.75	-27.75
0.03232	-5.082	5.082
0.03236	3.3	-3.3
0.0324	-226.1m	0.2261
0.03244	-1.209	1.209
0.03248	-8.983	8.983
0.03252	25.06	-25.06
0.03256	8.155	-8.155
0.0326	9.08	-9.08
0.03264	1.277	-1.277
0.03268	1.421	-1.421
0.03272	17.26	-17.26
0.03276	11.19	-11.19
0.0328	9.022	-9.022
0.03284	11.1	-11.1
0.03288	-22.54	22.54
0.03292	-22.74	22.74
0.03296	6.71	-6.71
0.033	2.751	-2.751
0.03304	2.924	-2.924
0.03308	8.618	-8.618
0.03312	4.687	-4.687
0.03316	10.93	-10.93
0.0332	5.785	-5.785
0.03324	8.011	-8.011
0.03328	-6.209	6.209
0.03332	21.28	-21.28
0.03336	-3.001	3.001
0.0334	2.953	-2.953
0.03344	8.184	-8.184
0.03348	669.8m	-0.6698
0.03352	-26.12	26.12
0.03356	-2.48	2.48
0.0336	5.236	-5.236
0.03364	9.311	-9.311
0.03368	6.941	-6.941
0.03372	5.121	-5.121
0.03376	-4.561	4.561
0.0338	5.207	-5.207
0.03384	-25.46	25.46
0.03388	1.392	-1.392
0.03392	3.011	-3.011
0.03396	9.369	-9.369
0.034	-977.6m	0.9776
0.03404	-6.816	6.816
0.03408	-4.648	4.648
0.03412	-399.5m	0.3995
0.03416	-10.72	10.72
0.0342	-27.91	27.91
0.03424	7.722	-7.722
0.03428	-9.185	9.185
0.03432	-7.885	7.885
0.03436	-5.891	5.891
0.0344	3.04	-3.04
0.03444	-13.81	13.81
0.03448	-8.29	8.29
0.03452	7.635	-7.635
0.03456	6.797	-6.797
0.0346	-7.134	7.134
0.03464	7.779	-7.779
0.03468	13.85	-13.85
0.03472	-17.74	17.74
0.03476	-8.145	8.145
0.0348	-9.937	9.937
0.03484	-7.769	7.769
0.03488	-1.064	1.064
0.03492	-15.23	15.23
0.03496	-12.25	12.25
0.035	1.219	-1.219
0.03504	-17.31	17.31
0.03508	-15.72	15.72
0.03512	-26.82	26.82
0.03516	-7.712	7.712
0.0352	9.976	-9.976
0.03524	-13.87	13.87
0.03528	-572.9m	0.5729
0.03532	-8.694	8.694
0.03536	236.3m	-0.2363
0.0354	-14.19	14.19
0.03544	-4.532	4.532
0.03548	11.16	-11.16
0.03552	-10.98	10.98
0.03556	4.571	-4.571
0.0356	4.543	-4.543
0.03564	-3.001	3.001
0.03568	24.08	-24.08
0.03572	1.71	-1.71
0.03576	-4.012	4.012
0.0358	-28.43	28.43
0.03584	-11.12	11.12
0.03588	5.265	-5.265
0.03592	-30.4	30.4
0.03596	-11.47	11.47
0.036	4.196	-4.196
0.03604	-24.47	24.47
0.03608	-15.69	15.69
0.03612	-13.23	13.23
0.03616	-7.596	7.596
0.0362	11.25	-11.25
0.03624	120.7m	-0.1207
0.03628	3.155	-3.155
0.03632	7.49	-7.49
0.03636	-16.3	16.3
0.0364	-11.47	11.47
0.03644	-5.457	5.457
0.03648	-13.26	13.26
0.03652	-6.729	6.729
0.03656	-10.08	10.08
0.0366	1.508	-1.508
0.03664	-11.93	11.93
0.03668	1.768	-1.768
0.03672	1.71	-1.71
0.03676	3.965	-3.965
0.0368	4.543	-4.543
0.03684	-9.677	9.677
0.03688	351.9m	-0.3519
0.03692	-14.79	14.79
0.03696	-6.555	6.555
0.037	13.44	-13.44
0.03704	1.913	-1.913
0.03708	5.756	-5.756
0.03712	3.762	-3.762
0.03716	15.29	-15.29
0.0372	2.895	-2.895
0.03724	2.288	-2.288
0.03728	-24.82	24.82
0.03732	-11.5	11.5
0.03736	1.277	-1.277
0.0374	-8.665	8.665
0.03744	-18.03	18.03
0.03748	-62.8	62.8
0.03752	-27.48	27.48
0.03756	9.427	-9.427
0.0376	-21.5	21.5
0.03764	-35.75	35.75
0.03768	-86.24	86.24
0.03772	-17.42	17.42
0.03776	-16.01	16.01
0.0378	-40.89	40.89
0.03784	-37.19	37.19
0.03788	-22.74	22.74
0.03792	-4.186	4.186
0.03796	-45.77	45.77
0.038	-66.67	66.67
0.03804	-53.66	53.66
0.03808	-28.55	28.55
0.03812	10.76	-10.76
0.03816	-42.05	42.05
0.0382	-69.73	69.73
0.03824	-35.28	35.28
0.03828	-34.91	34.91
0.03832	-29.82	29.82
0.03836	-11.32	11.32
0.0384	-34.24	34.24
0.03844	-51.76	51.76
0.03848	-56.01	56.01
0.03852	4.571	-4.571
0.03856	-4.995	4.995
0.0386	-19.59	19.59
0.03864	-13.84	13.84
0.03868	-27.74	27.74
0.03872	-30.2	30.2
0.03876	-37.97	37.97
0.0388	-27.77	27.77
0.03884	-21.27	21.27
0.03888	-6.18	6.18
0.03892	-20.11	20.11
0.03896	-24.39	24.39
0.039	-18.87	18.87
0.03904	-22.68	22.68
0.03908	-5.631	5.631
0.03912	17.4	-17.4
0.03916	4.658	-4.658
0.0392	-16.27	16.27
0.03924	-26.82	26.82
0.03928	-40.14	40.14
0.03932	-38.98	38.98
0.03936	-12.48	12.48
0.0394	-27.34	27.34
0.03944	-24.16	24.16
0.03948	-28.66	28.66
0.03952	-20.25	20.25
0.03956	-8.001	8.001
0.0396	-13.64	13.64
0.03964	16.1	-16.1
0.03968	-4.214	4.214
0.03972	12.06	-12.06
0.03976	-18.14	18.14
0.0398	-11.3	11.3
0.03984	-53.14	53.14
0.03988	-53.84	53.84
0.03992	-19.91	19.91
0.03996	11.28	-11.28
0.04	-40.86	40.86
0.04004	11.57	-11.57
0.04008	-33.26	33.26
0.04012	5.959	-5.959
0.04016	120.7m	-0.1207
0.0402	-14.5	14.5
0.04024	16.57	-16.57
0.04028	-20.25	20.25
0.04032	-15.89	15.89
0.04036	-9.041	9.041
0.0404	-2.452	2.452
0.04044	-17.68	17.68
0.04048	-12.19	12.19
0.04052	-13.32	13.32
0.04056	-14.99	14.99
0.0406	7.779	-7.779
0.04064	-15.46	15.46
0.04068	-10.78	10.78
0.04072	-52.73m	0.05273
0.04076	5.699	-5.699
0.0408	-16.99	16.99
0.04084	-4.793	4.793
0.04088	-22.05	22.05
0.04092	-6.844	6.844
0.04096	-18.9	18.9
0.041	-4.677	4.677
0.04104	-8.723	8.723
0.04108	-17.36	17.36
0.04112	11.59	-11.59
0.04116	-11.35	11.35
0.0412	-20.77	20.77
0.04124	14.14	-14.14
0.04128	3.358	-3.358
0.04132	-11.32	11.32
0.04136	-919.8m	0.9198
0.0414	-19.16	19.16
0.04144	1.71	-1.71
0.04148	-2.683	2.683
0.04152	-14.5	14.5
0.04156	-4.012	4.012
0.0416	9.109	-9.109
0.04164	-10.8	10.8
0.04168	-2.798	2.798
0.04172	843.2m	-0.8432
0.04176	9.514	-9.514
0.0418	8.82	-8.82
0.04184	-2.047	2.047
0.04188	-13.35	13.35
0.04192	-11.06	11.06
0.04196	-9.908	9.908
0.042	8.271	-8.271
0.04204	-6.613	6.613
0.04208	8.3	-8.3
0.04212	-23	23
0.04216	19.05	-19.05
0.0422	9.918	-9.918
0.04224	-4.966	4.966
0.04228	5.699	-5.699
0.04232	-20.89	20.89
0.04236	-3.29	3.29
0.0424	-5.371	5.371
0.04244	-19.42	19.42
0.04248	15.21	-15.21
0.04252	-7.22	7.22
0.04256	-3.665	3.665
0.0426	8.444	-8.444
0.04264	11.16	-11.16
0.04268	42.11	-42.11
0.04272	62.88m	-0.06288
0.04276	-3.174	3.174
0.0428	25.78	-25.78
0.04284	-948.7m	0.9487
0.04288	15.9	-15.9
0.04292	-3.001	3.001
0.04296	19.66	-19.66
0.043	-18.87	18.87
0.04304	-9.561	9.561
0.04308	-6.613	6.613
0.04312	11.68	-11.68
0.04316	32.89	-32.89
0.0432	-1.151	1.151
0.04324	7.433	-7.433
0.04328	10.73	-10.73
0.04332	14.05	-14.05
0.04336	5.785	-5.785
0.0434	6.306	-6.306
0.04344	583.1m	-0.5831
0.04348	-7.307	7.307
0.04352	12.37	-12.37
0.04356	15.55	-15.55
0.0436	2.664	-2.664
0.04364	9.803	-9.803
0.04368	-457.3m	0.4573
0.04372	11.8	-11.8
0.04376	16.07	-16.07
0.0438	13.82	-13.82
0.04384	-8.521	8.521
0.04388	727.6m	-0.7276
0.04392	-9.995	9.995
0.04396	-1.035	1.035
0.044	-10.46	10.46
0.04404	2.866	-2.866
0.04408	6.103	-6.103
0.04412	10.99	-10.99
0.04416	17.87	-17.87
0.0442	22.78	-22.78
0.04424	14.69	-14.69
0.04428	9.571	-9.571
0.04432	-4.359	4.359
0.04436	-28.2	28.2
0.0444	-2.191	2.191
0.04444	-1.787	1.787
0.04448	6.768	-6.768
0.04452	-2.798	2.798
0.04456	409.7m	-0.4097
0.0446	20.93	-20.93
0.04464	380.8m	-0.3808
0.04468	13.07	-13.07
0.04472	640.9m	-0.6409
0.04476	6.479	-6.479
0.0448	13.3	-13.3
0.04484	8.358	-8.358
0.04488	-2.769	2.769
0.04492	-16.41	16.41
0.04496	-5.573	5.573
0.045	13.91	-13.91
0.04504	3.502	-3.502
0.04508	-5.602	5.602
0.04512	7.028	-7.028
0.04516	-168.3m	0.1683
0.0452	14.74	-14.74
0.04524	20.29	-20.29
0.04528	2.433	-2.433
0.04532	-1.035	1.035
0.04536	-7.596	7.596
0.0454	3.965	-3.965
0.04544	-9.388	9.388
0.04548	13.53	-13.53
0.04552	15.79	-15.79
0.04556	28.33	-28.33
0.0456	22.29	-22.29
0.04564	3.704	-3.704
0.04568	5.034	-5.034
0.04572	8.097	-8.097
0.04576	17.69	-17.69
0.0458	14.4	-14.4
0.04584	-24.1	24.1
0.04588	-15.72	15.72
0.04592	-7.047	7.047
0.04596	4.774	-4.774
0.046	-15.98	15.98
0.04604	5.121	-5.121
0.04608	14.11	-14.11
0.04612	-3.319	3.319
0.04616	-3.347	3.347
0.0462	-7.827	7.827
0.04624	18.36	-18.36
0.04628	4.774	-4.774
0.04632	5.063	-5.063
0.04636	-10.11	10.11
0.0464	4.543	-4.543
0.04644	-1.584	1.584
0.04648	-19.56	19.56
0.04652	-23.64	23.64
0.04656	496.4m	-0.4964
0.0466	2.78	-2.78
0.04664	11.71	-11.71
0.04668	5.381	-5.381
0.04672	7.375	-7.375
0.04676	-5.804	5.804
0.0468	7.751	-7.751
0.04684	5.121	-5.121
0.04688	-7.162	7.162
0.04692	-8.318	8.318
0.04696	33.97m	-0.03397
0.047	-601.9m	0.6019
0.04704	10.44	-10.44
0.04708	2.346	-2.346
0.04712	-3.694	3.694
0.04716	1.855	-1.855
0.0472	5.236	-5.236
0.04724	-12.74	12.74
0.04728	-13.98	13.98
0.04732	13.21	-13.21
0.04736	3.097	-3.097
0.0474	36.91	-36.91
0.04744	46.54	-46.54
0.04748	30.9	-30.9
0.04752	36.71	-36.71
0.04756	46.02	-46.02
0.0476	29.66	-29.66
0.04764	25.84	-25.84
0.04768	49.95	-49.95
0.04772	74.05	-74.05
0.04776	106.4	-106.4
0.0478	46.97	-46.97
0.04784	20.99	-20.99
0.04788	-1.931	1.931
0.04792	54.34	-54.34
0.04796	76.42	-76.42
0.048	17.2	-17.2
0.04804	22.72	-22.72
0.04808	49.19	-49.19
0.04812	50.61	-50.61
0.04816	11.57	-11.57
0.0482	20.76	-20.76
0.04824	36.68	-36.68
0.04828	50.03	-50.03
0.04832	50.78	-50.78
0.04836	43.24	-43.24
0.0484	38.07	-38.07
0.04844	36.39	-36.39
0.04848	42.95	-42.95
0.04852	17.46	-17.46
0.04856	26.07	-26.07
0.0486	43.13	-43.13
0.04864	16.25	-16.25
0.04868	4.918	-4.918
0.04872	6.508	-6.508
0.04876	50.5	-50.5
0.0488	-11.79	11.79
0.04884	99.4	-99.4
0.04888	85.29	-85.29
0.04892	-1.527	1.527
0.04896	48.76	-48.76
0.049	19.89	-19.89
0.04904	66.65	-66.65
0.04908	45.09	-45.09
0.04912	43.13	-43.13
0.04916	32.2	-32.2
0.0492	-717.5m	0.7175
0.04924	28.3	-28.3
0.04928	17.2	-17.2
0.04932	47.55	-47.55
0.04936	35.47	-35.47
0.0494	17.66	-17.66
0.04944	33.5	-33.5
0.04948	15.24	-15.24
0.04952	67.52	-67.52
0.04956	27.14	-27.14
0.0496	16.05	-16.05
0.04964	13.65	-13.65
0.04968	27.95	-27.95
0.04972	55.55	-55.55
0.04976	46.97	-46.97
0.0498	23.76	-23.76
0.04984	17.52	-17.52
0.04988	34.77	-34.77
0.04992	16.19	-16.19
0.04996	20.7	-20.7
0.05	94.54	-94.54
0.05004	44.63	-44.63
0.05008	20.55	-20.55
0.05012	-17.02	17.02
0.05016	14.17	-14.17
0.0502	38.7	-38.7
0.05024	46.07	-46.07
0.05028	39.51	-39.51
0.05032	45.41	-45.41
0.05036	32.89	-32.89
0.0504	-5.197	5.197
0.05044	25.38	-25.38
0.05048	23.62	-23.62
0.05052	19.66	-19.66
0.05056	22.03	-22.03
0.0506	10.76	-10.76
0.05064	18.88	-18.88
0.05068	20.52	-20.52
0.05072	27.98	-27.98
0.05076	51.07	-51.07
0.0508	18.47	-18.47
0.05084	8.936	-8.936
0.05088	31.54	-31.54
0.05092	-8.203	8.203
0.05096	9.716	-9.716
0.051	12.06	-12.06
0.05104	12.84	-12.84
0.05108	-15.2	15.2
0.05112	-1.758	1.758
0.05116	11.51	-11.51
0.0512	4.86	-4.86
0.05124	46.25	-46.25
0.05128	42.61	-42.61
0.05132	6.017	-6.017
0.05136	10.18	-10.18
0.0514	2.577	-2.577
0.05144	-6.18	6.18
0.05148	13.39	-13.39
0.05152	8.271	-8.271
0.05156	9.456	-9.456
0.0516	13.1	-13.1
0.05164	13.36	-13.36
0.05168	-3.376	3.376
0.05172	236.3m	-0.2363
0.05176	9.282	-9.282
0.0518	-5.197	5.197
0.05184	4.398	-4.398
0.05188	-34.24	34.24
0.05192	15.55	-15.55
0.05196	7.259	-7.259
0.052	6.306	-6.306
0.05204	6.277	-6.277
0.05208	10.58	-10.58
0.05212	-7.625	7.625
0.05216	15.06	-15.06
0.0522	8.647	-8.647
0.05224	-12.45	12.45
0.05228	-2.538	2.538
0.05232	-1.18	1.18
0.05236	-1.902	1.902
0.0524	-2.018	2.018
0.05244	4.803	-4.803
0.05248	-10.43	10.43
0.05252	3.04	-3.04
0.05256	13.21	-13.21
0.0526	-6.844	6.844
0.05264	-1.96	1.96
0.05268	-5.717	5.717
0.05272	11.25	-11.25
0.05276	16.1	-16.1
0.0528	-2.134	2.134
0.05284	-5.891	5.891
0.05288	9.196	-9.196
0.05292	3.242	-3.242
0.05296	18.01	-18.01
0.053	-31.29	31.29
0.05304	15	-15
0.05308	7.173	-7.173
0.05312	4.34	-4.34
0.05316	-775.3m	0.7753
0.0532	6.768	-6.768
0.05324	6.363	-6.363
0.05328	6.392	-6.392
0.05332	-4.966	4.966
0.05336	-370.6m	0.3706
0.0534	12.95	-12.95
0.05344	-5.053	5.053
0.05348	-4.33	4.33
0.05352	-8.607	8.607
0.05356	-15.95	15.95
0.0536	-4.243	4.243
0.05364	2.519	-2.519
0.05368	-22.02	22.02
0.05372	-9.532	9.532
0.05376	-1.382	1.382
0.0538	-2.336	2.336
0.05384	3.126	-3.126
0.05388	-5.486	5.486
0.05392	-977.6m	0.9776
0.05396	2.346	-2.346
0.054	5.496	-5.496
0.05404	9.716	-9.716
0.05408	8.878	-8.878
0.05412	-4.648	4.648
0.05416	-8.665	8.665
0.0542	13.85	-13.85
0.05424	-2.163	2.163
0.05428	-11.82	11.82
0.05432	1.537	-1.537
0.05436	-1.498	1.498
0.0544	-20.28	20.28
0.05444	-23.49	23.49
0.05448	-3.839	3.839
0.05452	-8.405	8.405
0.05456	4.658	-4.658
0.0546	-14.1	14.1
0.05464	-32.25	32.25
0.05468	5.149	-5.149
0.05472	3.415	-3.415
0.05476	-17.42	17.42
0.0548	-1.18	1.18
0.05484	2.635	-2.635
0.05488	-659.7m	0.6597
0.05492	323m	-0.323
0.05496	-3.405	3.405
0.055	-12.57	12.57
0.05504	1.19	-1.19
0.05508	-16.01	16.01
0.05512	-15.46	15.46
0.05516	12.11	-12.11
0.0552	-3.752	3.752
0.05524	20.12	-20.12
0.05528	-7.018	7.018
0.05532	727.6m	-0.7276
0.05536	10.99	-10.99
0.0554	-2.567	2.567
0.05544	-601.9m	0.6019
0.05548	-7.22	7.22
0.05552	-4.59	4.59
0.05556	-6.064	6.064
0.0556	-8.492	8.492
0.05564	1.392	-1.392
0.05568	4.889	-4.889
0.05572	8.878	-8.878
0.05576	-5.255	5.255
0.0558	-12.39	12.39
0.05584	13.1	-13.1
0.05588	-10.46	10.46
0.05592	1.855	-1.855
0.05596	-30.02	30.02
0.056	-11.56	11.56
0.05604	-7.509	7.509
0.05608	-15.49	15.49
0.05612	-2.538	2.538
0.05616	-25.54	25.54
0.0562	15.06	-15.06
0.05624	-13.23	13.23
0.05628	5.207	-5.207
0.05632	1.884	-1.884
0.05636	10.58	-10.58
0.0564	-7.162	7.162
0.05644	-6.122	6.122
0.05648	-862m	0.862
0.05652	-11.15	11.15
0.05656	4.687	-4.687
0.0566	-25.66	25.66
0.05664	6.623	-6.623
0.05668	438.6m	-0.4386
0.05672	25.99	-25.99
0.05676	19.37	-19.37
0.0568	10.9	-10.9
0.05684	11.57	-11.57
0.05688	7.375	-7.375
0.05692	-7.683	7.683
0.05696	-16.93	16.93
0.057	-5.66	5.66
0.05704	-25.43	25.43
0.05708	-16.79	16.79
0.05712	-746.4m	0.7464
0.05716	2.693	-2.693
0.0572	-3.319	3.319
0.05724	5.641	-5.641
0.05728	15.24	-15.24
0.05732	23.65	-23.65
0.05736	8.791	-8.791
0.0574	1.537	-1.537
0.05744	-28.72	28.72
0.05748	-98.75	98.75
0.05752	-45.08	45.08
0.05756	-26.06	26.06
0.0576	-63.46	63.46
0.05764	-55.51	55.51
0.05768	-32.48	32.48
0.05772	-1.469	1.469
0.05776	-36.81	36.81
0.0578	-39.65	39.65
0.05784	-12.1	12.1
0.05788	-1.064	1.064
0.05792	-21.01	21.01
0.05796	-50.28	50.28
0.058	-75.98	75.98
0.05804	-47.97	47.97
0.05808	-26.24	26.24
0.05812	-19.76	19.76
0.05816	-40.95	40.95
0.0582	-41.09	41.09
0.05824	1.306	-1.306
0.05828	-63.87	63.87
0.05832	-63.64	63.64
0.05836	-50.95	50.95
0.0584	-11.84	11.84
0.05844	-18.58	18.58
0.05848	-27.31	27.31
0.05852	-57.31	57.31
0.05856	-3.203	3.203
0.0586	-43.35	43.35
0.05864	-22.39	22.39
0.05868	-31.29	31.29
0.05872	-6.324	6.324
0.05876	-1.064	1.064
0.0588	-38.95	38.95
0.05884	-32.91	32.91
0.05888	-14.91	14.91
0.05892	10.15	-10.15
0.05896	-23.64	23.64
0.059	-27.97	27.97
0.05904	-41.24	41.24
0.05908	3.849	-3.849
0.05912	6.826	-6.826
0.05916	-21.38	21.38
0.0592	-15.63	15.63
0.05924	-32.31	32.31
0.05928	-22.22	22.22
0.05932	-20.69	20.69
0.05936	-9.388	9.388
0.0594	-9.532	9.532
0.05944	-833.1m	0.8331
0.05948	-52.73m	0.05273
0.05952	-40.14	40.14
0.05956	-16.73	16.73
0.0596	-32.13	32.13
0.05964	-22.62	22.62
0.05968	-23.55	23.55
0.05972	-20.66	20.66
0.05976	19.74	-19.74
0.0598	-20.63	20.63
0.05984	-7.625	7.625
0.05988	-3.319	3.319
0.05992	-8.868	8.868
0.05996	-10.49	10.49
0.06	-18.93	18.93
0.06004	-22.19	22.19
0.06008	-12.05	12.05
0.06012	-34.18	34.18
0.06016	-2.191	2.191
0.0602	3.358	-3.358
0.06024	-3.145	3.145
0.06028	4.918	-4.918
0.06032	-15.57	15.57
0.06036	-10.78	10.78
0.0604	-22.86	22.86
0.06044	-12.36	12.36
0.06048	-29.36	29.36
0.06052	-31.38	31.38
0.06056	-2.856	2.856
0.0606	-16.32	16.32
0.06064	-15.6	15.6
0.06068	-14.5	14.5
0.06072	756.5m	-0.7565
0.06076	-1.267	1.267
0.0608	7.982	-7.982
0.06084	-32.22	32.22
0.06088	-1.787	1.787
0.06092	-13.67	13.67
0.06096	12.75	-12.75
0.061	-6.151	6.151
0.06104	-10.02	10.02
0.06108	8.329	-8.329
0.06112	-32.36	32.36
0.06116	15.03	-15.03
0.0612	6.017	-6.017
0.06124	7.028	-7.028
0.06128	9.427	-9.427
0.06132	28.99	-28.99
0.06136	6.912	-6.912
0.0614	7.144	-7.144
0.06144	11.19	-11.19
0.06148	-5.168	5.168
0.06152	-7.683	7.683
0.06156	-3.232	3.232
0.0616	-2.596	2.596
0.06164	20.87	-20.87
0.06168	1.999	-1.999
0.06172	-1.382	1.382
0.06176	17.89	-17.89
0.0618	-3.839	3.839
0.06184	2.924	-2.924
0.06188	583.1m	-0.5831
0.06192	16.42	-16.42
0.06196	-29.33	29.33
0.062	18.42	-18.42
0.06204	-10.83	10.83
0.06208	-9.966	9.966
0.06212	-1.613	1.613
0.06216	2.433	-2.433
0.0622	1.999	-1.999
0.06224	13.82	-13.82
0.06228	-1.931	1.931
0.06232	2.173	-2.173
0.06236	6.421	-6.421
0.0624	3.965	-3.965
0.06244	-8.347	8.347
0.06248	-31.41	31.41
0.06252	-717.5m	0.7175
0.06256	-21.9	21.9
0.0626	19.25	-19.25
0.06264	35.24	-35.24
0.06268	12.92	-12.92
0.06272	1.421	-1.421
0.06276	7.086	-7.086
0.0628	19.57	-19.57
0.06284	-1.006	1.006
0.06288	8.733	-8.733
0.06292	2.375	-2.375
0.06296	-9.908	9.908
0.063	11.22	-11.22
0.06304	-2.596	2.596
0.06308	-1.295	1.295
0.06312	207.4m	-0.2074
0.06316	13.53	-13.53
0.0632	10.9	-10.9
0.06324	8.791	-8.791
0.06328	14.77	-14.77
0.06332	1.45	-1.45
0.06336	-7.105	7.105
0.0634	11.71	-11.71
0.06344	12	-12
0.06348	-5.428	5.428
0.06352	785.4m	-0.7854
0.06356	-2.683	2.683
0.0636	-3.434	3.434
0.06364	669.8m	-0.6698
0.06368	-6.093	6.093
0.06372	-283.9m	0.2839
0.06376	4.022	-4.022
0.0638	17.2	-17.2
0.06384	10.58	-10.58
0.06388	-1.093	1.093
0.06392	5.901	-5.901
0.06396	-17.6	17.6
0.064	1.19	-1.19
0.06404	1.595	-1.595
0.06408	-6.035	6.035
0.06412	4.947	-4.947
0.06416	10.12	-10.12
0.0642	13.85	-13.85
0.06424	10.73	-10.73
0.06428	3.56	-3.56
0.06432	18.39	-18.39
0.06436	20.47	-20.47
0.0644	-15.57	15.57
0.06444	-8.55	8.55
0.06448	4.022	-4.022
0.06452	4.167	-4.167
0.06456	15.93	-15.93
0.0646	-5.284	5.284
0.06464	7.577	-7.577
0.06468	-10.02	10.02
0.06472	-1.469	1.469
0.06476	7.982	-7.982
0.0648	-16.09	16.09
0.06484	17.49	-17.49
0.06488	15.21	-15.21
0.06492	-9.561	9.561
0.06496	18.53	-18.53
0.065	-8.463	8.463
0.06504	14.57	-14.57
0.06508	8.415	-8.415
0.06512	5.843	-5.843
0.06516	-1.556	1.556
0.0652	-2.538	2.538
0.06524	12.49	-12.49
0.06528	9.6	-9.6
0.06532	-862m	0.862
0.06536	-9.243	9.243
0.0654	640.9m	-0.6409
0.06544	12.69	-12.69
0.06548	-1.469	1.469
0.06552	2.982	-2.982
0.06556	-6.238	6.238
0.0656	9.427	-9.427
0.06564	5.641	-5.641
0.06568	27.55	-27.55
0.06572	13.59	-13.59
0.06576	-1.093	1.093
0.0658	28.88	-28.88
0.06584	11.25	-11.25
0.06588	-12.8	12.8
0.06592	-919.8m	0.9198
0.06596	-10.34	10.34
0.066	11.05	-11.05
0.06604	-15.83	15.83
0.06608	3.791	-3.791
0.06612	6.797	-6.797
0.06616	8.386	-8.386
0.0662	16.48	-16.48
0.06624	17.4	-17.4
0.06628	3.415	-3.415
0.06632	7.779	-7.779
0.06636	8.184	-8.184
0.0664	9.774	-9.774
0.06644	265.2m	-0.2652
0.06648	-9.503	9.503
0.06652	14.6	-14.6
0.06656	-16.76	16.76
0.0666	2.173	-2.173
0.06664	-10.14	10.14
0.06668	-3.463	3.463
0.06672	2.317	-2.317
0.06676	13.82	-13.82
0.0668	9.398	-9.398
0.06684	9.6	-9.6
0.06688	-3.145	3.145
0.06692	-746.4m	0.7464
0.06696	-14.73	14.73
0.067	6.479	-6.479
0.06704	-1.758	1.758
0.06708	6.537	-6.537
0.06712	-1.671	1.671
0.06716	8.3	-8.3
0.0672	12.17	-12.17
0.06724	1.306	-1.306
0.06728	6.623	-6.623
0.06732	4.022	-4.022
0.06736	71.74	-71.74
0.0674	37.32	-37.32
0.06744	16.16	-16.16
0.06748	55.44	-55.44
0.06752	78.53	-78.53
0.06756	38.15	-38.15
0.0676	7.808	-7.808
0.06764	6.017	-6.017
0.06768	17.63	-17.63
0.06772	87.72	-87.72
0.06776	42.61	-42.61
0.0678	29.6	-29.6
0.06784	7.779	-7.779
0.06788	39.6	-39.6
0.06792	28.01	-28.01
0.06796	29.83	-29.83
0.068	33.24	-33.24
0.06804	41.42	-41.42
0.06808	84.4	-84.4
0.06812	45.99	-45.99
0.06816	24.69	-24.69
0.0682	21.48	-21.48
0.06824	49.57	-49.57
0.06828	52.03	-52.03
0.06832	21.57	-21.57
0.06836	43.88	-43.88
0.0684	25.47	-25.47
0.06844	56.45	-56.45
0.06848	16.83	-16.83
0.06852	26.68	-26.68
0.06856	28.99	-28.99
0.0686	31.28	-31.28
0.06864	59.17	-59.17
0.06868	46.48	-46.48
0.06872	10.93	-10.93
0.06876	18.99	-18.99
0.0688	38.76	-38.76
0.06884	38.01	-38.01
0.06888	38.1	-38.1
0.06892	46.07	-46.07
0.06896	46.97	-46.97
0.069	23.01	-23.01
0.06904	4.514	-4.514
0.06908	13.62	-13.62
0.06912	38.73	-38.73
0.06916	64.83	-64.83
0.0692	34.43	-34.43
0.06924	-5.255	5.255
0.06928	30.67	-30.67
0.06932	37.92	-37.92
0.06936	59.92	-59.92
0.0694	38.5	-38.5
0.06944	35.93	-35.93
0.06948	38.44	-38.44
0.06952	5.178	-5.178
0.06956	-3.03	3.03
0.0696	28.96	-28.96
0.06964	46.07	-46.07
0.06968	47	-47
0.06972	41.83	-41.83
0.06976	24.02	-24.02
0.0698	44.08	-44.08
0.06984	27.03	-27.03
0.06988	39.02	-39.02
0.06992	48.18	-48.18
0.06996	30.73	-30.73
0.07	41.62	-41.62
0.07004	19.95	-19.95
0.07008	22.46	-22.46
0.07012	34.83	-34.83
0.07016	18.07	-18.07
0.0702	42.06	-42.06
0.07024	36.65	-36.65
0.07028	39.72	-39.72
0.07032	40.47	-40.47
0.07036	4.398	-4.398
0.0704	5.872	-5.872
0.07044	21.71	-21.71
0.07048	4.196	-4.196
0.07052	41.85	-41.85
0.07056	31.97	-31.97
0.0706	43.88	-43.88
0.07064	640.9m	-0.6409
0.07068	-2.105	2.105
0.07072	19.69	-19.69
0.07076	32.03	-32.03
0.0708	25.5	-25.5
0.07084	-1.469	1.469
0.07088	21.59	-21.59
0.07092	10.32	-10.32
0.07096	36.59	-36.59
0.071	10.64	-10.64
0.07104	2.259	-2.259
0.07108	-13.12	13.12
0.07112	5.467	-5.467
0.07116	-17.28	17.28
0.0712	1.103	-1.103
0.07124	19.86	-19.86
0.07128	-81.63m	0.08163
0.07132	22.35	-22.35
0.07136	11.22	-11.22
0.0714	2.028	-2.028
0.07144	14.86	-14.86
0.07148	15.44	-15.44
0.07152	10.21	-10.21
0.07156	22.89	-22.89
0.0716	22.11	-22.11
0.07164	20.35	-20.35
0.07168	-10.37	10.37
0.07172	-3.608	3.608
0.07176	26.51	-26.51
0.0718	6.941	-6.941
0.07184	16.88	-16.88
0.07188	3.126	-3.126
0.07192	-14.99	14.99
0.07196	2.519	-2.519
0.072	4.774	-4.774
0.07204	1.161	-1.161
0.07208	9.658	-9.658
0.07212	-2.769	2.769
0.07216	-11.47	11.47
0.0722	23.42	-23.42
0.07224	-1.671	1.671
0.07228	19.14	-19.14
0.07232	11.94	-11.94
0.07236	13.76	-13.76
0.0724	12.09	-12.09
0.07244	-9.995	9.995
0.07248	1.826	-1.826
0.07252	-3.03	3.03
0.07256	10.12	-10.12
0.0726	-15.25	15.25
0.07264	5.554	-5.554
0.07268	-24.85	24.85
0.07272	7.057	-7.057
0.07276	-17.45	17.45
0.0728	12.17	-12.17
0.07284	22.72	-22.72
0.07288	-21.09	21.09
0.07292	6.537	-6.537
0.07296	15.21	-15.21
0.073	7.606	-7.606
0.07304	-20.23	20.23
0.07308	4.6	-4.6
0.07312	6.768	-6.768
0.07316	-4.186	4.186
0.0732	8.097	-8.097
0.07324	-8.058	8.058
0.07328	6.912	-6.912
0.07332	1.479	-1.479
0.07336	14.69	-14.69
0.0734	-13.69	13.69
0.07344	-255m	0.255
0.07348	-9.099	9.099
0.07352	-13.06	13.06
0.07356	2.115	-2.115
0.0736	6.797	-6.797
0.07364	-4.301	4.301
0.07368	-6.844	6.844
0.07372	-26.84	26.84
0.07376	-6.555	6.555
0.0738	7.519	-7.519
0.07384	15.79	-15.79
0.07388	9.542	-9.542
0.07392	-15.08	15.08
0.07396	-6.931	6.931
0.074	-21.58	21.58
0.07404	-9.706	9.706
0.07408	-13.78	13.78
0.07412	-2.48	2.48
0.07416	-13	13
0.0742	-14.5	14.5
0.07424	10.06	-10.06
0.07428	-16.41	16.41
0.07432	91.78m	-0.09178
0.07436	1.363	-1.363
0.0744	-399.5m	0.3995
0.07444	8.04	-8.04
0.07448	-20.08	20.08
0.07452	-4.301	4.301
0.07456	-1.989	1.989
0.0746	2.635	-2.635
0.07464	438.6m	-0.4386
0.07468	-13.69	13.69
0.07472	1.595	-1.595
0.07476	7.057	-7.057
0.0748	22.69	-22.69
0.07484	4.716	-4.716
0.07488	-11.24	11.24
0.07492	10.24	-10.24
0.07496	149.6m	-0.1496
0.075	-11.87	11.87
0.07504	3.907	-3.907
0.07508	-13.67	13.67
0.07512	12.78	-12.78
0.07516	-31.01	31.01
0.0752	-23.75	23.75
0.07524	727.6m	-0.7276
0.07528	554.2m	-0.5542
0.07532	-2.394	2.394
0.07536	-15.4	15.4
0.0754	16.31	-16.31
0.07544	-6.266	6.266
0.07548	10.55	-10.55
0.07552	-18.93	18.93
0.07556	-12.39	12.39
0.0756	-4.186	4.186
0.07564	-12.71	12.71
0.07568	-8.781	8.781
0.07572	3.618	-3.618
0.07576	-1.238	1.238
0.0758	17.32	-17.32
0.07584	-4.301	4.301
0.07588	-283.9m	0.2839
0.07592	-16.96	16.96
0.07596	12.61	-12.61
0.076	-8.347	8.347
0.07604	-6.671	6.671
0.07608	-717.5m	0.7175
0.07612	5.554	-5.554
0.07616	-17.62	17.62
0.0762	-10.4	10.4
0.07624	16.77	-16.77
0.07628	-13.41	13.41
0.07632	-8.318	8.318
0.07636	4.34	-4.34
0.0764	11.25	-11.25
0.07644	11.19	-11.19
0.07648	-14.62	14.62
0.07652	-9.532	9.532
0.07656	-17.16	17.16
0.0766	-7.134	7.134
0.07664	-3.723	3.723
0.07668	-2.307	2.307
0.07672	3.04	-3.04
0.07676	-572.9m	0.5729
0.0768	-8.376	8.376
0.07684	29.2	-29.2
0.07688	-3.203	3.203
0.07692	-1.556	1.556
0.07696	-7.307	7.307
0.077	-14.13	14.13
0.07704	-3.29	3.29
0.07708	-8.463	8.463
0.07712	10.03	-10.03
0.07716	-6.787	6.787
0.0772	-5.342	5.342
0.07724	-7.307	7.307
0.07728	1.71	-1.71
0.07732	2.115	-2.115
0.07736	-36.7	36.7
0.0774	583.1m	-0.5831
0.07744	-12.83	12.83
0.07748	-6.96	6.96
0.07752	-61.32	61.32
0.07756	-42.42	42.42
0.0776	-11.99	11.99
0.07764	-33.72	33.72
0.07768	-40.6	40.6
0.07772	-13.78	13.78
0.07776	12.78	-12.78
0.0778	-16.15	16.15
0.07784	-52.6	52.6
0.07788	-66.44	66.44
0.07792	-34.39	34.39
0.07796	-255m	0.255
0.078	-42.94	42.94
0.07804	-40.98	40.98
0.07808	-41.44	41.44
0.07812	-22.57	22.57
0.07816	-25.92	25.92
0.0782	-53.52	53.52
0.07824	-61.27	61.27
0.07828	-40.51	40.51
0.07832	-5.371	5.371
0.07836	-25.43	25.43
0.0784	-14.47	14.47
0.07844	-43.69	43.69
0.07848	-13.12	13.12
0.07852	-39.62	39.62
0.07856	-64.99	64.99
0.0786	-4.504	4.504
0.07864	-15.66	15.66
0.07868	14.8	-14.8
0.07872	-46.76	46.76
0.07876	-39.33	39.33
0.0788	-11.44	11.44
0.07884	-41.5	41.5
0.07888	-11.32	11.32
0.07892	-4.532	4.532
0.07896	-24.04	24.04
0.079	-29.36	29.36
0.07904	-28.23	28.23
0.07908	-38.92	38.92
0.07912	1.768	-1.768
0.07916	-45.34	45.34
0.0792	-39.21	39.21
0.07924	-14.47	14.47
0.07928	-13.12	13.12
0.07932	-16.79	16.79
0.07936	-17.51	17.51
0.0794	-15.66	15.66
0.07944	-4.272	4.272
0.07948	-15.17	15.17
0.07952	-7.943	7.943
0.07956	5.612	-5.612
0.0796	-12.42	12.42
0.07964	-1.845	1.845
0.07968	-18.17	18.17
0.07972	-7.278	7.278
0.07976	-13.55	13.55
0.0798	-6.122	6.122
0.07984	-13.58	13.58
0.07988	-20.43	20.43
0.07992	-5.92	5.92
[truncated: 98,001 more rows]

## Sheet: Sheet1
		100	2500
time	data	butfilt1	Stress
0.288	250.5	1304.15	0.52166
0.28804	-93.04	1318.68	0.527474
0.28808	456.4	1333.06	0.533223
0.28812	3359	1347.26	0.538902
0.28816	5105	1361.26	0.544505
0.2882	6743	1375.06	0.550025
0.28824	8537	1388.65	0.555458
0.28828	9587	1402	0.560799
0.28832	10220	1415.11	0.566046
0.28836	8960	1427.99	0.571195
0.2884	8172	1440.62	0.576247
0.28844	8181	1453	0.581202
0.28848	6832	1465.15	0.586061
0.28852	5944	1477.07	0.590828
0.28856	5627	1488.76	0.595506
0.2886	3638	1500.25	0.600099
0.28864	2042	1511.53	0.604611
0.28868	1464	1522.62	0.609049
0.28872	1033	1533.54	0.613418
0.28876	515.3	1544.31	0.617722
0.2888	559.3	1554.92	0.621968
0.28884	1103	1565.4	0.62616
0.28888	952.8	1575.76	0.630304
0.28892	504.2	1586.01	0.634404
0.28896	556.7	1596.16	0.638465
0.289	112	1606.23	0.642491
0.28904	203.3	1616.22	0.646489
0.28908	793	1626.15	0.65046
0.28912	779.9	1636.03	0.65441
0.28916	953.8	1645.86	0.658343
0.2892	608.8	1655.65	0.662262
0.28924	210.4	1665.43	0.66617
0.28928	-362.7	1675.18	0.670072
0.28932	-975.9	1684.93	0.673971
0.28936	-937.4	1694.67	0.677869
0.2894	-620.3	1704.42	0.681768
0.28944	-336.1	1714.18	0.685672
0.28948	-0.7854	1723.95	0.689581
0.28952	339.8	1733.74	0.693498
0.28956	438.5	1743.56	0.697422
0.2896	473.5	1753.39	0.701356
0.28964	666.7	1763.25	0.7053
0.28968	875	1773.13	0.709254
0.28972	1017	1783.05	0.713218
0.28976	1140	1792.98	0.717194
0.2898	1078	1802.95	0.72118
0.28984	848.9	1812.94	0.725176
0.28988	417.2	1822.96	0.729183
0.28992	-29.2	1833	0.733201
0.28996	-314.8	1843.07	0.737227
0.29	-246	1853.16	0.741263
0.29004	15.6	1863.26	0.745306
0.29008	1026	1873.39	0.749354
0.29012	2527	1883.52	0.753407
0.29016	3308	1893.65	0.757462
0.2902	3919	1903.79	0.761517
0.29024	4519	1913.93	0.765572
0.29028	4815	1924.06	0.769623
0.29032	4556	1934.18	0.773672
0.29036	4013	1944.29	0.777716
0.2904	3921	1954.39	0.781757
0.29044	3393	1964.49	0.785794
0.29048	2437	1974.57	0.789828
0.29052	1874	1984.65	0.79386
0.29056	1111	1994.73	0.79789
0.2906	306.6	2004.8	0.80192
0.29064	-65.9	2014.87	0.80595
0.29068	125.1	2024.95	0.80998
0.29072	508.4	2035.03	0.814012
0.29076	1087	2045.11	0.818043
0.2908	1804	2055.19	0.822075
0.29084	2408	2065.27	0.826107
0.29088	2832	2075.35	0.830138
0.29092	4084	2085.42	0.834168
0.29096	5508	2095.49	0.838196
0.291	5744	2105.56	0.842223
0.29104	6467	2115.62	0.846249
0.29108	6840	2125.69	0.850274
0.29112	6547	2135.75	0.854301
0.29116	5967	2145.83	0.858333
0.2912	4832	2155.93	0.862372
0.29124	3465	2166.05	0.866421
0.29128	2297	2176.22	0.870486
0.29132	1500	2186.43	0.874571
0.29136	468.9	2196.7	0.878679
0.2914	-556.1	2207.04	0.882816
0.29144	-1105	2217.46	0.886984
0.29148	-1363	2227.97	0.891188
0.29152	-1276	2238.58	0.895431
0.29156	-621.6	2249.29	0.899715
0.2916	238.4	2260.11	0.904043
0.29164	858.3	2271.04	0.908415
0.29168	1572	2282.08	0.912833
0.29172	2009	2293.25	0.917299
0.29176	2061	2304.53	0.921812
0.2918	2070	2315.94	0.926374
0.29184	1645	2327.46	0.930986
0.29188	793.8	2339.12	0.935647
0.29192	286.5	2350.9	0.94036
0.29196	836.3	2362.81	0.945123
0.292	1466	2374.84	0.949937
0.29204	1731	2387.01	0.954802
0.29208	2504	2399.3	0.959718
0.29212	3402	2411.71	0.964684
0.29216	3876	2424.25	0.9697
0.2922	3967	2436.91	0.974765
0.29224	3554	2449.7	0.97988
0.29228	3413	2462.61	0.985044
0.29232	3600	2475.65	0.990258
0.29236	3304	2488.81	0.995523
0.2924	2865	2502.1	1.00084
0.29244	2905	2515.52	1.00621
0.29248	2660	2529.07	1.01163
0.29252	1807	2542.75	1.0171
0.29256	1659	2556.58	1.02263
0.2926	1485	2570.54	1.02822
0.29264	1216	2584.64	1.03386
0.29268	1679	2598.88	1.03955
0.29272	2314	2613.27	1.04531
0.29276	2592	2627.8	1.05112
0.2928	2555	2642.47	1.05699
0.29284	3190	2657.28	1.06291
0.29288	3492	2672.24	1.0689
0.29292	3461	2687.35	1.07494
0.29296	3818	2702.6	1.08104
0.293	4071	2717.99	1.0872
0.29304	3985	2733.54	1.09341
0.29308	3741	2749.23	1.09969
0.29312	3607	2765.08	1.10603
0.29316	3183	2781.08	1.11243
0.2932	2829	2797.24	1.1189
0.29324	2595	2813.56	1.12543
0.29328	2097	2830.05	1.13202
0.29332	1653	2846.71	1.13868
0.29336	1475	2863.54	1.14541
0.2934	1309	2880.54	1.15222
0.29344	1199	2897.72	1.15909
0.29348	1156	2915.08	1.16603
0.29352	1147	2932.61	1.17305
0.29356	1201	2950.33	1.18013
0.2936	1273	2968.22	1.18729
0.29364	1536	2986.29	1.19452
0.29368	1885	3004.54	1.20181
0.29372	2481	3022.95	1.20918
0.29376	3112	3041.54	1.21662
0.2938	3653	3060.29	1.22412
0.29384	4214	3079.2	1.23168
0.29388	4629	3098.28	1.23931
0.29392	4904	3117.51	1.247
0.29396	4903	3136.9	1.25476
0.294	4853	3156.44	1.26258
0.29404	4738	3176.14	1.27045
0.29408	4384	3195.99	1.27839
0.29412	4065	3215.99	1.2864
0.29416	3723	3236.15	1.29446
0.2942	3357	3256.47	1.30259
0.29424	2947	3276.95	1.31078
0.29428	2615	3297.59	1.31903
0.29432	2418	3318.39	1.32735
0.29436	2192	3339.35	1.33574
0.2944	2102	3360.48	1.34419
0.29444	2022	3381.77	1.35271
0.29448	1889	3403.23	1.36129
0.29452	1793	3424.86	1.36994
0.29456	1891	3446.65	1.37866
0.2946	2092	3468.6	1.38744
0.29464	2323	3490.71	1.39628
0.29468	2775	3512.98	1.40519
0.29472	3238	3535.4	1.41416
0.29476	3621	3557.98	1.42319
0.2948	3945	3580.69	1.43228
0.29484	4268	3603.56	1.44142
0.29488	4348	3626.56	1.45062
0.29492	4314	3649.7	1.45988
0.29496	4336	3672.97	1.46919
0.295	4241	3696.37	1.47855
0.29504	3937	3719.9	1.48796
0.29508	3676	3743.56	1.49742
0.29512	3479	3767.33	1.50693
0.29516	3219	3791.23	1.51649
0.2952	3106	3815.25	1.5261
0.29524	3075	3839.39	1.53575
0.29528	3123	3863.63	1.54545
0.29532	3129	3887.99	1.5552
0.29536	3141	3912.45	1.56498
0.2954	3137	3937.02	1.57481
0.29544	3255	3961.69	1.58467
0.29548	3434	3986.45	1.59458
0.29552	3674	4011.3	1.60452
0.29556	3878	4036.23	1.61449
0.2956	4072	4061.25	1.6245
0.29564	4203	4086.34	1.63453
0.29568	4305	4111.49	1.6446
0.29572	4627	4136.72	1.65469
0.29576	5021	4162	1.6648
0.2958	5137	4187.34	1.67494
0.29584	5105	4212.73	1.68509
0.29588	5075	4238.17	1.69527
0.29592	4876	4263.65	1.70546
0.29596	4627	4289.17	1.71567
0.296	4365	4314.73	1.72589
0.29604	4073	4340.32	1.73613
0.29608	3870	4365.94	1.74638
0.29612	3783	4391.59	1.75664
0.29616	3722	4417.26	1.76691
0.2962	3710	4442.96	1.77718
0.29624	3769	4468.67	1.78747
0.29628	3833	4494.39	1.79776
0.29632	3857	4520.12	1.80805
0.29636	3999	4545.86	1.81834
0.2964	4182	4571.59	1.82864
0.29644	4337	4597.32	1.83893
0.29648	4486	4623.04	1.84922
0.29652	4599	4648.74	1.8595
0.29656	4625	4674.42	1.86977
0.2966	4570	4700.08	1.88003
0.29664	4601	4725.7	1.89028
0.29668	4551	4751.28	1.90051
0.29672	4521	4776.82	1.91073
0.29676	4588	4802.3	1.92092
0.2968	4599	4827.74	1.93109
0.29684	4572	4853.11	1.94124
0.29688	4455	4878.41	1.95137
0.29692	4269	4903.65	1.96146
0.29696	4097	4928.8	1.97152
0.297	3994	4953.87	1.98155
0.29704	3991	4978.84	1.99154
0.29708	4006	5003.72	2.00149
0.29712	4147	5028.49	2.0114
0.29716	4314	5053.14	2.02126
0.2972	4564	5077.67	2.03107
0.29724	4829	5102.07	2.04083
0.29728	5133	5126.33	2.05053
0.29732	5385	5150.44	2.06017
0.29736	5596	5174.39	2.06975
0.2974	5775	5198.17	2.07927
0.29744	5923	5221.78	2.08871
0.29748	6088	5245.2	2.09808
0.29752	6175	5268.43	2.10737
0.29756	6183	5291.46	2.11659
0.2976	6159	5314.29	2.12572
0.29764	6076	5336.9	2.13476
0.29768	5985	5359.29	2.14371
0.29772	5982	5381.45	2.15258
0.29776	5884	5403.37	2.16135
0.2978	5753	5425.06	2.17002
0.29784	5620	5446.5	2.1786
0.29788	5564	5467.69	2.18708
0.29792	5473	5488.62	2.19545
0.29796	5307	5509.29	2.20372
0.298	5073	5529.69	2.21188
0.29804	4864	5549.82	2.21993
0.29808	4719	5569.67	2.22787
0.29812	4685	5589.24	2.23569
0.29816	4671	5608.51	2.2434
0.2982	4772	5627.48	2.25099
0.29824	4965	5646.15	2.25846
0.29828	5060	5664.5	2.2658
0.29832	5181	5682.53	2.27301
0.29836	5193	5700.23	2.28009
0.2984	5208	5717.6	2.28704
0.29844	5266	5734.62	2.29385
0.29848	5351	5751.28	2.30051
0.29852	5538	5767.59	2.30703
0.29856	5694	5783.52	2.31341
0.2986	5903	5799.07	2.31963
0.29864	6014	5814.22	2.32569
0.29868	6126	5828.98	2.33159
0.29872	6219	5843.34	2.33733
0.29876	6414	5857.27	2.34291
0.2988	6583	5870.78	2.34831
0.29884	6772	5883.86	2.35354
0.29888	6890	5896.49	2.3586
0.29892	6910	5908.67	2.36347
0.29896	6893	5920.4	2.36816
0.299	6755	5931.66	2.37266
0.29904	6581	5942.45	2.37698
0.29908	6389	5952.77	2.38111
0.29912	6291	5962.6	2.38504
0.29916	6287	5971.94	2.38877
0.2992	6350	5980.78	2.39231
0.29924	6438	5989.13	2.39565
0.29928	6475	5996.96	2.39879
0.29932	6430	6004.29	2.40172
0.29936	6390	6011.1	2.40444
0.2994	6326	6017.39	2.40696
0.29944	6286	6023.15	2.40926
0.29948	6224	6028.38	2.41135
0.29952	6165	6033.08	2.41323
0.29956	6151	6037.23	2.41489
0.2996	6147	6040.84	2.41634
0.29964	6125	6043.9	2.41756
0.29968	6152	6046.41	2.41856
0.29972	6171	6048.36	2.41934
0.29976	6214	6049.75	2.4199
0.2998	6286	6050.57	2.42023
0.29984	6374	6050.82	2.42033
0.29988	6494	6050.5	2.4202
0.29992	6533	6049.6	2.41984
0.29996	6577	6048.11	2.41925
0.3	6619	6046.04	2.41842
0.30004	6654	6043.39	2.41735
0.30008	6755	6040.14	2.41605
0.30012	6809	6036.29	2.41452
0.30016	6850	6031.85	2.41274
0.3002	6929	6026.81	2.41072
0.30024	7006	6021.16	2.40847
0.30028	7114	6014.92	2.40597
0.30032	7166	6008.07	2.40323
0.30036	7158	6000.61	2.40024
0.3004	7072	5992.55	2.39702
0.30044	6890	5983.88	2.39355
0.30048	6674	5974.61	2.38984
0.30052	6474	5964.73	2.38589
0.30056	6262	5954.25	2.3817
0.3006	6132	5943.17	2.37727
0.30064	6078	5931.49	2.3726
0.30068	6092	5919.21	2.36768
0.30072	6145	5906.33	2.36253
0.30076	6206	5892.86	2.35714
0.3008	6242	5878.8	2.35152
0.30084	6282	5864.14	2.34566
0.30088	6348	5848.9	2.33956
0.30092	6423	5833.07	2.33323
0.30096	6511	5816.66	2.32666
0.301	6589	5799.66	2.31986
0.30104	6609	5782.09	2.31284
0.30108	6592	5763.94	2.30558
0.30112	6553	5745.22	2.29809
0.30116	6517	5725.93	2.29037
0.3012	6497	5706.08	2.28243
0.30124	6520	5685.68	2.27427
0.30128	6512	5664.71	2.26589
0.30132	6573	5643.2	2.25728
0.30136	6557	5621.15	2.24846
0.3014	6467	5598.56	2.23942
0.30144	6293	5575.44	2.23018
0.30148	6112	5551.8	2.22072
0.30152	6000	5527.64	2.21105
0.30156	5873	5502.97	2.20119
0.3016	5861	5477.79	2.19112
0.30164	5862	5452.13	2.18085
0.30168	5905	5425.97	2.17039
0.30172	5952	5399.34	2.15974
0.30176	5950	5372.24	2.14889
0.3018	5940	5344.67	2.13787
0.30184	5914	5316.65	2.12666
0.30188	5855	5288.18	2.11527
0.30192	5743	5259.28	2.10371
0.30196	5680	5229.95	2.09198
0.302	5593	5200.2	2.08008
0.30204	5482	5170.04	2.06802
0.30208	5341	5139.48	2.05579
0.30212	5246	5108.54	2.04341
0.30216	5172	5077.21	2.03089
0.3022	5194	5045.52	2.01821
0.30224	5194	5013.47	2.00539
0.30228	5214	4981.07	1.99243
0.30232	5253	4948.32	1.97933
0.30236	5228	4915.26	1.9661
0.3024	5220	4881.87	1.95275
0.30244	5166	4848.17	1.93927
0.30248	5103	4814.18	1.92567
0.30252	5032	4779.9	1.91196
0.30256	4973	4745.35	1.89814
0.3026	4887	4710.53	1.88421
0.30264	4794	4675.46	1.87018
0.30268	4739	4640.15	1.85606
0.30272	4680	4604.6	1.84184
0.30276	4615	4568.83	1.82753
0.3028	4560	4532.86	1.81314
0.30284	4466	4496.69	1.79868
0.30288	4371	4460.33	1.78413
0.30292	4259	4423.8	1.76952
0.30296	4102	4387.1	1.75484
0.303	3946	4350.25	1.7401
0.30304	3827	4313.26	1.7253
0.30308	3797	4276.14	1.71046
0.30312	3810	4238.9	1.69556
0.30316	3869	4201.55	1.68062
0.3032	3920	4164.1	1.66564
0.30324	4028	4126.56	1.65062
0.30328	4055	4088.94	1.63558
0.30332	4073	4051.25	1.6205
0.30336	4062	4013.51	1.6054
0.3034	4013	3975.72	1.59029
0.30344	3946	3937.88	1.57515
0.30348	3863	3900.02	1.56001
0.30352	3719	3862.14	1.54486
0.30356	3605	3824.25	1.5297
0.3036	3499	3786.37	1.51455
0.30364	3386	3748.49	1.4994
0.30368	3334	3710.64	1.48426
0.30372	3312	3672.82	1.46913
0.30376	3339	3635.04	1.45401
0.3038	3345	3597.3	1.43892
0.30384	3337	3559.63	1.42385
0.30388	3339	3522.03	1.40881
0.30392	3326	3484.5	1.3938
0.30396	3332	3447.06	1.37882
0.304	3265	3409.72	1.36389
0.30404	3194	3372.48	1.34899
0.30408	3125	3335.35	1.33414
0.30412	3107	3298.34	1.31934
0.30416	3011	3261.47	1.30459
0.3042	2947	3224.73	1.28989
0.30424	2878	3188.14	1.27526
0.30428	2796	3151.71	1.26068
0.30432	2694	3115.44	1.24618
0.30436	2574	3079.35	1.23174
0.3044	2393	3043.43	1.21737
0.30444	2206	3007.7	1.20308
0.30448	2007	2972.17	1.18887
0.30452	1854	2936.84	1.17474
0.30456	1769	2901.72	1.16069
0.3046	1764	2866.82	1.14673
0.30464	1788	2832.14	1.13285
0.30468	1883	2797.68	1.11907
0.30472	1982	2763.46	1.10538
0.30476	2063	2729.47	1.09179
0.3048	2094	2695.73	1.07829
0.30484	2120	2662.23	1.06489
0.30488	2118	2628.98	1.05159
0.30492	2148	2595.98	1.03839
0.30496	2142	2563.24	1.0253
0.305	2122	2530.76	1.0123
0.30504	2076	2498.54	0.999416
0.30508	2008	2466.59	0.986634
0.30512	1971	2434.9	0.973961
0.30516	1950	2403.49	0.961395
0.3052	1966	2372.35	0.948939
0.30524	2034	2341.48	0.936593
0.30528	2080	2310.9	0.924359
0.30532	2169	2280.59	0.912236
0.30536	2216	2250.56	0.900226
0.3054	2225	2220.82	0.888329
0.30544	2192	2191.36	0.876546
0.30548	2120	2162.19	0.864878
0.30552	2043	2133.31	0.853325
0.30556	1955	2104.72	0.841889
0.3056	1879	2076.42	0.830569
0.30564	1823	2048.42	0.819367
0.30568	1790	2020.71	0.808283
0.30572	1776	1993.29	0.797318
0.30576	1727	1966.18	0.786472
0.3058	1661	1939.36	0.775746
0.30584	1620	1912.85	0.76514
0.30588	1560	1886.64	0.754655
0.30592	1459	1860.73	0.744291
0.30596	1362	1835.12	0.734049
0.306	1291	1809.82	0.723928
0.30604	1212	1784.82	0.71393
0.30608	1184	1760.13	0.704053
0.30612	1177	1735.75	0.694299
0.30616	1235	1711.67	0.684667
0.3062	1295	1687.89	0.675156
0.30624	1366	1664.42	0.665768
0.30628	1420	1641.25	0.6565
0.30632	1412	1618.39	0.647354
0.30636	1414	1595.82	0.638329
0.3064	1370	1573.56	0.629424
0.30644	1330	1551.6	0.620639
0.30648	1289	1529.93	0.611973
0.30652	1246	1508.57	0.603427
0.30656	1174	1487.5	0.594998
0.3066	1160	1466.72	0.586688
0.30664	1145	1446.24	0.578494
0.30668	1145	1426.04	0.570418
0.30672	1163	1406.14	0.562456
0.30676	1221	1386.53	0.55461
0.3068	1262	1367.2	0.546879
0.30684	1279	1348.15	0.53926
0.30688	1262	1329.39	0.531754
0.30692	1229	1310.9	0.52436
0.30696	1171	1292.69	0.517076
0.307	1101	1274.76	0.509902
0.30704	1069	1257.09	0.502838
0.30708	1027	1239.7	0.495881
0.30712	1031	1222.58	0.489031
0.30716	1026	1205.72	0.482288
0.3072	1056	1189.12	0.475649
0.30724	1123	1172.79	0.469115
0.30728	1205	1156.71	0.462683
0.30732	1246	1140.88	0.456353
0.30736	1288	1125.31	0.450124
0.3074	1326	1109.99	0.443994
0.30744	1255	1094.91	0.437964
0.30748	1234	1080.08	0.43203
0.30752	1208	1065.48	0.426194
0.30756	1099	1051.13	0.420453
0.3076	998.2	1037.02	0.414807
0.30764	1029	1023.14	0.409255
0.30768	1075	1009.49	0.403795
0.30772	1073	996.07	0.398428
0.30776	1068	982.879	0.393152
0.3078	1079	969.914	0.387966
0.30784	1046	957.172	0.382869
0.30788	914.3	944.65	0.37786
0.30792	784.7	932.348	0.372939
0.30796	618.5	920.262	0.368105
0.308	541.9	908.39	0.363356
0.30804	465.1	896.731	0.358692
0.30808	422.8	885.281	0.354112
0.30812	423.8	874.037	0.349615
0.30816	411.9	862.998	0.345199
0.3082	479.7	852.16	0.340864
0.30824	606.8	841.519	0.336608
0.30828	677.5	831.073	0.332429
0.30832	728.4	820.818	0.328327
0.30836	808.3	810.75	0.3243
0.3084	857.9	800.866	0.320347
0.30844	861.1	791.163	0.316465
0.30848	863.4	781.637	0.312655
0.30852	853.5	772.283	0.308913
0.30856	896.1	763.1	0.30524
0.3086	916.6	754.084	0.301633
0.30864	968.4	745.23	0.298092
0.30868	1004	736.537	0.294615
0.30872	1072	728	0.2912
0.30876	1048	719.616	0.287846
0.3088	1050	711.383	0.284553
0.30884	999.4	703.298	0.281319
0.30888	962.4	695.357	0.278143
0.30892	945.8	687.559	0.275024
0.30896	861.4	679.901	0.27196
0.309	721.2	672.38	0.268952
0.30904	613.1	664.995	0.265998
0.30908	666.2	657.742	0.263097
0.30912	614.7	650.619	0.260248
0.30916	661.7	643.625	0.25745
0.3092	666.2	636.757	0.254703
0.30924	748	630.012	0.252005
0.30928	803.6	623.388	0.249355
0.30932	879.8	616.884	0.246754
0.30936	945.8	610.496	0.244198
0.3094	937	604.223	0.241689
0.30944	899.4	598.063	0.239225
0.30948	836.5	592.013	0.236805
0.30952	731.2	586.073	0.234429
0.30956	685.8	580.241	0.232096
0.3096	629.8	574.514	0.229806
0.30964	599.8	568.893	0.227557
0.30968	644.4	563.374	0.22535
0.30972	607.6	557.957	0.223183
0.30976	590.6	552.64	0.221056
0.3098	544.8	547.422	0.218969
0.30984	472.3	542.301	0.21692
0.30988	457.8	537.276	0.21491
0.30992	427.8	532.345	0.212938
0.30996	353	527.508	0.211003
0.31	258.3	522.762	0.209105
0.31004	243.6	518.107	0.207243
0.31008	228.7	513.539	0.205416
0.31012	260.3	509.058	0.203623
0.31016	331.2	504.661	0.201865
0.3102	419.7	500.347	0.200139
0.31024	545.8	496.114	0.198446
0.31028	612.4	491.959	0.196784
0.31032	676.3	487.881	0.195152
0.31036	685.4	483.877	0.193551
0.3104	702.5	479.945	0.191978
0.31044	681.6	476.084	0.190433
0.31048	615.1	472.291	0.188917
0.31052	565.9	468.566	0.187426
0.31056	490.7	464.906	0.185962
0.3106	432.3	461.31	0.184524
0.31064	376.8	457.776	0.18311
0.31068	332.4	454.302	0.181721
0.31072	285.3	450.888	0.180355
0.31076	266.5	447.53	0.179012
0.3108	284.6	444.228	0.177691
0.31084	317.7	440.98	0.176392
0.31088	321.5	437.783	0.175113
0.31092	319	434.636	0.173854
0.31096	327.3	431.537	0.172615
0.311	274.4	428.483	0.171393
0.31104	275.1	425.473	0.170189
0.31108	276.1	422.505	0.169002
0.31112	362.6	419.576	0.16783
0.31116	551.9	416.684	0.166674
0.3112	691.7	413.827	0.165531
0.31124	855.4	411.002	0.164401
0.31128	996.1	408.208	0.163283
0.31132	1061	405.442	0.162177
0.31136	1078	402.704	0.161082
0.3114	1054	399.991	0.159996
0.31144	1011	397.302	0.158921
0.31148	938.2	394.637	0.157855
0.31152	822.3	391.994	0.156798
0.31156	718.7	389.374	0.155749
0.3116	626.2	386.775	0.15471
0.31164	488.9	384.198	0.153679
0.31168	385.2	381.643	0.152657
0.31172	350.9	379.11	0.151644
0.31176	350.3	376.598	0.150639
0.3118	338.1	374.108	0.149643
0.31184	339.5	371.64	0.148656
0.31188	327.3	369.193	0.147677
0.31192	318	366.768	0.146707
0.31196	275.7	364.364	0.145745
0.312	217.2	361.981	0.144792
0.31204	222.4	359.619	0.143848
0.31208	226.1	357.279	0.142912
0.31212	272.5	354.959	0.141984
0.31216	318.1	352.66	0.141064
0.3122	375.1	350.381	0.140152
0.31224	363.3	348.121	0.139248
0.31228	397.9	345.881	0.138353
0.31232	381	343.661	0.137464
0.31236	347.6	341.459	0.136583
0.3124	351.3	339.275	0.13571
0.31244	322	337.11	0.134844
0.31248	244.8	334.963	0.133985
0.31252	230.9	332.834	0.133134
0.31256	185.1	330.722	0.132289
0.3126	174.2	328.627	0.131451
0.31264	182.1	326.549	0.130619
0.31268	220.9	324.486	0.129794
0.31272	314.4	322.439	0.128976
0.31276	353.1	320.408	0.128163
0.3128	421.4	318.39	0.127356
0.31284	489.8	316.386	0.126555
0.31288	529.7	314.396	0.125758
0.31292	531.8	312.419	0.124968
0.31296	463.6	310.454	0.124182
0.313	430.6	308.501	0.1234
0.31304	372.6	306.56	0.122624
0.31308	283.5	304.631	0.121853
0.31312	240.1	302.714	0.121086
0.31316	203.2	300.808	0.120323
0.3132	199	298.913	0.119565
0.31324	180.5	297.029	0.118812
0.31328	208.5	295.156	0.118062
0.31332	193.5	293.294	0.117317
0.31336	201.8	291.441	0.116576
0.3134	171.9	289.598	0.115839
0.31344	158.6	287.764	0.115106
0.31348	137.4	285.94	0.114376
0.31352	127.5	284.123	0.113649
0.31356	103.7	282.314	0.112926
0.3136	90.72	280.512	0.112205
0.31364	123.6	278.717	0.111487
0.31368	176.1	276.927	0.110771
0.31372	275.1	275.141	0.110057
0.31376	396.9	273.36	0.109344
0.3138	519	271.581	0.108633
0.31384	600.2	269.805	0.107922
0.31388	680.3	268.03	0.107212
0.31392	687.6	266.256	0.106502
0.31396	680.1	264.482	0.105793
0.314	618.8	262.708	0.105083
0.31404	545.9	260.934	0.104374
0.31408	502.2	259.16	0.103664
0.31412	472.7	257.387	0.102955
0.31416	471.1	255.613	0.102245
0.3142	461.8	253.84	0.101536
0.31424	460.7	252.069	0.100828
0.31428	443.4	250.299	0.100119
0.31432	438.2	248.531	0.0994123
0.31436	428.9	246.766	0.0987062
0.3144	410.2	245.004	0.0980015
0.31444	375.1	243.247	0.0972986
0.31448	353.3	241.494	0.0965977
0.31452	307.9	239.748	0.0958993
0.31456	268.9	238.009	0.0952037
0.3146	264.9	236.278	0.0945113
0.31464	234.3	234.556	0.0938226
0.31468	230.9	232.845	0.0931378
0.31472	216.3	231.144	0.0924575
0.31476	235	229.455	0.091782
0.3148	236.8	227.779	0.0911118
0.31484	227.2	226.118	0.0904472
0.31488	184.6	224.472	0.0897886
0.31492	148.7	222.841	0.0891365
0.31496	103.1	221.228	0.0884913
0.315	61.81	219.633	0.0878533
0.31504	23.03	218.057	0.0872229
0.31508	-11.39	216.501	0.0866004
0.31512	-14.02	214.965	0.0859862
0.31516	-22.03	213.451	0.0853805
0.3152	21.99	211.959	0.0847836
0.31524	36.15	210.489	0.0841957
0.31528	61.09	209.042	0.0836169
0.31532	81.41	207.618	0.0830474
0.31536	99.15	206.218	0.0824873
0.3154	119.1	204.842	0.0819368
0.31544	128.8	203.49	0.0813958
0.31548	108	202.161	0.0808645
0.31552	73.78	200.857	0.080343
0.31556	42.74	199.578	0.0798312
0.3156	15.2	198.323	0.0793292
0.31564	-0.4097	197.093	0.078837
0.31568	6.642	195.887	0.0783546
0.31572	33.78	194.705	0.0778819
0.31576	47.91	193.547	0.0774187
0.3158	72.02	192.413	0.0769651
0.31584	97.36	191.302	0.0765208
0.31588	112.9	190.214	0.0760856
0.31592	106.8	189.149	0.0756595
0.31596	100.2	188.105	0.0752422
0.316	86.5	187.084	0.0748335
0.31604	63.09	186.083	0.0744332
0.31608	62.97	185.103	0.0740411
0.31612	46.96	184.142	0.0736569
0.31616	9.995	183.201	0.0732803
0.3162	5.486	182.278	0.0729111
0.31624	11.61	181.372	0.0725489
0.31628	16.61	180.483	0.0721933
0.31632	38.46	179.61	0.0718441
0.31636	54.44	178.752	0.0715008
0.3164	112.6	177.907	0.0711629
0.31644	136.6	177.075	0.0708301
0.31648	177.4	176.255	0.0705019
0.31652	194.1	175.444	0.0701777
0.31656	202.6	174.643	0.0698573
0.3166	205.7	173.85	0.06954
0.31664	229.5	173.064	0.0692255
0.31668	248.9	172.283	0.0689134
0.31672	285.5	171.508	0.068603
0.31676	331.9	170.735	0.0682942
0.3168	372.8	169.966	0.0679863
0.31684	404.3	169.198	0.0676791
0.31688	417.4	168.431	0.0673722
0.31692	427.4	167.663	0.0670654
0.31696	398.6	166.895	0.0667582
0.317	366.4	166.126	0.0664505
0.31704	341	165.355	0.0661421
0.31708	318.4	164.582	0.0658328
0.31712	301.8	163.806	0.0655226
0.31716	303.9	163.028	0.0652111
0.3172	303.7	162.246	0.0648985
0.31724	320.2	161.462	0.0645846
0.31728	330.9	160.673	0.0642694
0.31732	303.4	159.882	0.0639528
0.31736	307.3	159.087	0.0636349
0.3174	267.9	158.289	0.0633156
0.31744	255.8	157.488	0.0629952
0.31748	221	156.684	0.0626735
0.31752	219.2	155.877	0.0623508
0.31756	156.9	155.068	0.062027
0.3176	137	154.256	0.0617024
0.31764	136	153.442	0.0613769
0.31768	172.8	152.627	0.0610508
0.31772	143.5	151.81	0.0607241
0.31776	128.9	150.992	0.060397
0.3178	170.5	150.174	0.0600695
0.31784	149.6	149.354	0.0597417
0.31788	73.64	148.534	0.0594137
0.31792	73.46	147.714	0.0590857
0.31796	57.86	146.894	0.0587578
0.318	63.84	146.075	0.0584299
0.31804	89.68	145.256	0.0581023
0.31808	30.92	144.437	0.0577749
0.31812	36.03	143.619	0.0574477
0.31816	47.91	142.802	0.0571209
0.3182	60.25	141.986	0.0567944
0.31824	119.8	141.17	0.0564681
0.31828	156.9	140.356	0.0561422
0.31832	93	139.542	0.0558166
0.31836	100.4	138.728	0.0554912
0.3184	83.03	137.915	0.0551661
0.31844	115.9	137.103	0.0548412
0.31848	101.9	136.291	0.0545164
0.31852	32.88	135.479	0.0541917
0.31856	47.45	134.668	0.0538671
0.3186	48.46	133.856	0.0535424
0.31864	11.82	133.044	0.0532177
0.31868	5.746	132.232	0.0528928
0.31872	65.08	131.419	0.0525676
0.31876	106.3	130.605	0.0522419
0.3188	149.5	129.789	0.0519157
0.31884	136.4	128.972	0.0515888
0.31888	124.8	128.152	0.051261
0.31892	89.47	127.33	0.0509322
0.31896	49.76	126.505	0.0506022
0.319	40.31	125.677	0.0502709
0.31904	-11.02	124.845	0.0499382
0.31908	33.43	124.009	0.0496038
0.31912	64.24	123.169	0.0492675
0.31916	105.8	122.323	0.0489292
0.3192	111.9	121.471	0.0485886
0.31924	129.8	120.614	0.0482455
0.31928	225.3	119.749	0.0478997
0.31932	229.8	118.877	0.0475509
0.31936	306.5	117.998	0.047199
0.3194	344	117.109	0.0468438
0.31944	316.5	116.213	0.046485
0.31948	250	115.307	0.0461227
0.31952	166.4	114.391	0.0457566
0.31956	110.6	113.467	0.0453867
0.3196	117.4	112.532	0.045013
0.31964	132.3	111.588	0.0446353
0.31968	163.5	110.634	0.0442537
0.31972	223.2	109.67	0.043868
0.31976	314	108.696	0.0434783
0.3198	367.1	107.711	0.0430844
0.31984	390	106.716	0.0426865
0.31988	389.4	105.711	0.0422844
0.31992	344.1	104.696	0.0418785
0.31996	329.8	103.672	0.0414686
0.32	295.5	102.638	0.0410551
0.32004	259.2	101.595	0.0406381
0.32008	233.3	100.545	0.0402179
0.32012	202.3	99.4869	0.0397948
0.32016	187.2	98.4222	0.0393689
0.3202	106.1	97.3516	0.0389406
0.32024	139.8	96.2758	0.0385103
0.32028	143.5	95.1955	0.0380782
0.32032	172.7	94.1117	0.0376447
0.32036	138.1	93.0251	0.03721
0.3204	51.55	91.9365	0.0367746
0.32044	-7.086	90.8469	0.0363388
0.32048	-93.12	89.7571	0.0359029
0.32052	-102.6	88.668	0.0354672
0.32056	-128.3	87.5801	0.035032
0.3206	-81.56	86.4943	0.0345977
0.32064	-13.62	85.4111	0.0341644
0.32068	88.69	84.331	0.0337324
0.32072	170.3	83.2545	0.0333018
0.32076	138.5	82.1822	0.0328729
0.3208	154.4	81.1145	0.0324458
0.32084	136.9	80.0521	0.0320208
0.32088	73.84	78.9953	0.0315981
0.32092	9.735	77.9449	0.031178
0.32096	-12.03	76.9014	0.0307606
0.321	-53.93	75.8654	0.0303462
0.32104	-68.53	74.8373	0.0299349
0.32108	-106.3	73.8177	0.0295271
0.32112	-89.28	72.807	0.0291228
0.32116	-90.67	71.8054	0.0287222
0.3212	-9.051	70.8134	0.0283253
0.32124	18.61	69.831	0.0279324
0.32128	82.59	68.8586	0.0275434
0.32132	143.5	67.8962	0.0271585
0.32136	134.2	66.9441	0.0267776
0.3214	112.2	66.0025	0.026401
0.32144	92.36	65.0715	0.0260286
0.32148	43.66	64.1514	0.0256606
0.32152	8.636	63.2425	0.025297
0.32156	7.48	62.345	0.024938
0.3216	-43.91	61.4592	0.0245837
0.32164	-46.62	60.5851	0.0242341
0.32168	-28.33	59.7231	0.0238892
0.32172	-37.55	58.8731	0.0235492
0.32176	-6.19	58.0353	0.0232141
0.3218	18.46	57.2097	0.0228839
0.32184	61.73	56.3964	0.0225586
0.32188	88.61	55.5954	0.0222382
0.32192	100.5	54.8066	0.0219226
0.32196	118.5	54.0301	0.0216121
0.322	111.1	53.266	0.0213064
0.32204	83.46	52.5143	0.0210057
0.32208	34.85	51.775	0.02071
0.32212	-17.09	51.0483	0.0204193
0.32216	-58.39	50.3343	0.0201337
0.3222	-89.37	49.6329	0.0198532
0.32224	-97.98	48.9443	0.0195777
0.32228	-84.45	48.2683	0.0193073
0.32232	-10.18	47.6049	0.019042
0.32236	-16.36	46.954	0.0187816
0.3224	56.01	46.3154	0.0185262
0.32244	50.98	45.6889	0.0182756
0.32248	61.76	45.0743	0.0180297
0.32252	77.36	44.4714	0.0177886
0.32256	72.62	43.88	0.017552
0.3226	39.53	43.3001	0.01732
0.32264	-26.39	42.7313	0.0170925
0.32268	-51.56	42.1736	0.0168694
0.32272	-92.34	41.6267	0.0166507
0.32276	-126.6	41.0904	0.0164362
0.3228	-59.17	40.5645	0.0162258
0.32284	-8.791	40.0486	0.0160194
0.32288	40.75	39.5423	0.0158169
0.32292	73.37	39.0452	0.0156181
0.32296	66.7	38.5569	0.0154228
0.323	62.59	38.0771	0.0152308
0.32304	70.83	37.6054	0.0150421
0.32308	1.613	37.1413	0.0148565
0.32312	24.42	36.6846	0.0146738
0.32316	-4.86	36.2348	0.0144939
0.3232	-43.04	35.7916	0.0143166
0.32324	-32.46	35.3546	0.0141418
0.32328	-17.43	34.9233	0.0139693
0.32332	-60.78	34.4974	0.013799
0.32336	-25.12	34.0763	0.0136305
0.3234	69.33	33.6595	0.0134638
0.32344	82.02	33.2466	0.0132986
0.32348	46.58	32.8369	0.0131348
0.32352	95.63	32.4301	0.012972
0.32356	60.6	32.0255	0.0128102
0.3236	-32.26	31.6228	0.0126491
0.32364	-83.41	31.2215	0.0124886
0.32368	-139	30.821	0.0123284
0.32372	-170.6	30.4209	0.0121684
0.32376	-92.26	30.0205	0.0120082
0.3238	-17.72	29.6192	0.0118477
0.32384	48.23	29.2163	0.0116865
0.32388	131.1	28.8109	0.0115244
0.32392	130.9	28.4025	0.011361
0.32396	79.13	27.9904	0.0111961
0.324	91.32	27.5737	0.0110295
0.32404	42.97	27.152	0.0108608
0.32408	-41.33	26.7246	0.0106898
0.32412	-65.18	26.2909	0.0105164
0.32416	-62.95	25.8502	0.0103401
0.3242	-51.71	25.402	0.0101608
0.32424	-33.53	24.9454	0.00997816
0.32428	-53.47	24.4798	0.00979191
0.32432	-70.81	24.0044	0.00960175
0.32436	11.24	23.5184	0.00940735
0.3244	60.25	23.021	0.00920839
0.32444	68.81	22.5114	0.00900455
0.32448	172.2	21.9887	0.0087955
0.32452	227.8	21.4523	0.00858093
0.32456	244.3	20.9014	0.00836055
0.3246	243.7	20.3352	0.0081341
0.32464	306.4	19.7534	0.00790135
0.32468	318.9	19.1553	0.00766212
0.32472	311	18.5407	0.00741627
0.32476	288.8	17.9092	0.0071637
0.3248	268.4	17.2609	0.00690436
0.32484	250.3	16.5956	0.00663823
0.32488	211	15.9134	0.00636536
0.32492	125.5	15.2145	0.00608581
0.32496	90.48	14.4992	0.00579967
0.325	68.4	13.7677	0.00550707
0.32504	21.53	13.0203	0.00520813
0.32508	2.105	12.2575	0.00490299
0.32512	-10.93	11.4795	0.00459178
0.32516	-32.09	10.6866	0.00427466
0.3252	-13.21	9.87938	0.00395175
0.32524	47.8	9.05797	0.00362319
0.32528	120.1	8.22275	0.0032891
0.32532	133.6	7.37407	0.00294963
0.32536	164.7	6.5123	0.00260492
0.3254	132.4	5.63788	0.00225515
0.32544	152.8	4.75129	0.00190051
0.32548	119.8	3.85307	0.00154123
0.32552	28.72	2.94381	0.00117753
0.32556	1.209	2.02416	0.000809662
0.3256	-30.29	1.09474	0.000437895
0.32564	-53.93	0.156214	6.24857e-05
0.32568	-65.06	-0.790781	-0.000316312
0.32572	-68.44	-1.74563	-0.000698251
0.32576	-49.08	-2.70773	-0.00108309
0.3258	-22.72	-3.67652	-0.00147061
0.32584	29.65	-4.65143	-0.00186057
0.32588	23.46	-5.63192	-0.00225277
0.32592	48.92	-6.61744	-0.00264697
0.32596	26.56	-7.6074	-0.00304296
0.326	-7.375	-8.60122	-0.00344049
0.32604	-17.17	-9.59831	-0.00383932
0.32608	-43.85	-10.5981	-0.00423922
0.32612	-65.87	-11.5999	-0.00463995
0.32616	-88.56	-12.6032	-0.00504127
0.3262	-85.67	-13.6074	-0.00544296
0.32624	-31.13	-14.612	-0.0058448
0.32628	8.752	-15.6165	-0.00624659
0.32632	14.82	-16.6203	-0.00664813
0.32636	45.89	-17.623	-0.0070492
0.3264	66.53	-18.624	-0.0074496
0.32644	73.29	-19.6228	-0.0078491
0.32648	94.79	-20.6187	-0.00824748
0.32652	74.07	-21.6112	-0.00864448
0.32656	48.49	-22.5996	-0.00903984
0.3266	1.989	-23.5832	-0.00943328
0.32664	-30.03	-24.5613	-0.00982451
0.32668	-40.24	-25.5331	-0.0102132
0.32672	-53.96	-26.4979	-0.0105992
0.32676	-66.71	-27.455	-0.010982
0.3268	-65.32	-28.4036	-0.0113615
0.32684	-60.35	-29.3431	-0.0117373
0.32688	-54.92	-30.2728	-0.0121091
0.32692	-40.18	-31.1919	-0.0124767
0.32696	-37.72	-32.0998	-0.0128399
0.327	-6.855	-32.9958	-0.0131983
0.32704	0.1105	-33.8793	-0.0135517
0.32708	-0.9588	-34.7495	-0.0138998
0.32712	-17.46	-35.6059	-0.0142423
0.32716	-8.213	-36.4476	-0.014579
0.3272	-30.29	-37.274	-0.0149096
0.32724	-84.22	-38.0844	-0.0152338
0.32728	-72.86	-38.8781	-0.0155512
0.32732	-88.99	-39.6542	-0.0158617
0.32736	-93.07	-40.4123	-0.0161649
0.3274	-90.23	-41.1515	-0.0164606
0.32744	-102.2	-41.8713	-0.0167485
0.32748	-121.6	-42.5709	-0.0170284
0.32752	-183.2	-43.2499	-0.0173
0.32756	-145.9	-43.9076	-0.0175631
0.3276	-147.6	-44.5436	-0.0178174
0.32764	-158.2	-45.1572	-0.0180629
0.32768	-172.8	-45.7482	-0.0182993
0.32772	-144.3	-46.316	-0.0185264
0.32776	-103.1	-46.8605	-0.0187442
0.3278	-151.6	-47.3811	-0.0189525
0.32784	-202.5	-47.8778	-0.0191511
0.32788	-207.3	-48.3502	-0.0193401
0.32792	-205.1	-48.7982	-0.0195193
0.32796	-167.9	-49.2216	-0.0196886
0.328	-185.3	-49.6205	-0.0198482
0.32804	-224.8	-49.9947	-0.0199979
0.32808	-197.5	-50.3444	-0.0201378
0.32812	-170.3	-50.6697	-0.0202679
0.32816	-182.7	-50.9707	-0.0203883
0.3282	-185.4	-51.2477	-0.0204991
0.32824	-156.9	-51.5009	-0.0206004
0.32828	-124.6	-51.7308	-0.0206923
0.32832	-155.6	-51.9375	-0.020775
0.32836	-121.6	-52.1217	-0.0208487
0.3284	-92.11	-52.2836	-0.0209134
0.32844	-25.41	-52.4238	-0.0209695
0.32848	-29.57	-52.5428	-0.0210171
0.32852	-28.99	-52.6409	-0.0210564
0.32856	4.012	-52.7188	-0.0210875
0.3286	15.95	-52.7768	-0.0211107
0.32864	72.88	-52.8153	-0.0211261
0.32868	66.64	-52.8349	-0.021134
0.32872	58.2	-52.8358	-0.0211343
0.32876	59.16	-52.8183	-0.0211273
0.3288	66.7	-52.7827	-0.0211131
0.32884	48.66	-52.7293	-0.0210917
0.32888	5.226	-52.6582	-0.0210633
0.32892	-7.144	-52.5695	-0.0210278
0.32896	-34.08	-52.4634	-0.0209854
0.329	-87.29	-52.34	-0.020936
0.32904	-142.3	-52.1993	-0.0208797
0.32908	-185.7	-52.0416	-0.0208166
0.32912	-198.4	-51.8668	-0.0207467
0.32916	-198.9	-51.6752	-0.0206701
0.3292	-113	-51.4671	-0.0205869
0.32924	-100.8	-51.2428	-0.0204971
0.32928	-106.6	-51.0025	-0.020401
0.32932	-89.11	-50.7467	-0.0202987
0.32936	-64.22	-50.4756	-0.0201903
0.3294	-46.65	-50.1898	-0.0200759
0.32944	-36.16	-49.8895	-0.0199558
0.32948	-18.18	-49.5751	-0.01983
0.32952	-30.06	-49.2471	-0.0196989
0.32956	2.48	-48.9059	-0.0195623
0.3296	-21.91	-48.5517	-0.0194207
0.32964	-23.21	-48.1849	-0.019274
0.32968	7.105	-47.8059	-0.0191224
0.32972	-16.48	-47.415	-0.018966
0.32976	25.86	-47.0125	-0.018805
0.3298	40.14	-46.5986	-0.0186394
0.32984	7.827	-46.1737	-0.0184695
0.32988	-22.06	-45.738	-0.0182952
0.32992	-82.34	-45.2916	-0.0181166
0.32996	-103.3	-44.8349	-0.0179339
0.33	-114.1	-44.3679	-0.0177472
0.33004	-129.5	-43.891	-0.0175564
0.33008	-118.8	-43.4044	-0.0173618
0.33012	-112.9	-42.9084	-0.0171633
0.33016	-116.2	-42.4033	-0.0169613
0.3302	-126.7	-41.8895	-0.0167558
0.33024	-76.04	-41.3674	-0.0165469
0.33028	-32.35	-40.8373	-0.0163349
0.33032	2.712	-40.2998	-0.0161199
0.33036	6.035	-39.7551	-0.0159021
0.3304	-9.138	-39.2038	-0.0156815
0.33044	-31.57	-38.6463	-0.0154585
0.33048	-6.623	-38.0828	-0.0152331
0.33052	-25.35	-37.5138	-0.0150055
0.33056	-41.91	-36.9397	-0.0147759
0.3306	-44.05	-36.3608	-0.0145443
0.33064	-45.12	-35.7775	-0.014311
0.33068	-13.27	-35.1901	-0.0140761
0.33072	-18.68	-34.5991	-0.0138396
0.33076	-0.4675	-34.0047	-0.0136019
0.3308	-25.26	-33.4074	-0.0133629
0.33084	0.6886	-32.8074	-0.0131229
0.33088	-0.2074	-32.2051	-0.012882
0.33092	1.874	-31.6008	-0.0126403
0.33096	10.69	-30.9949	-0.012398
0.331	-35.47	-30.3876	-0.0121551
0.33104	-13.04	-29.7793	-0.0119117
0.33108	-53.73	-29.1701	-0.0116681
0.33112	-32.61	-28.5605	-0.0114242
0.33116	-37.89	-27.9506	-0.0111802
0.3312	-37.14	-27.3408	-0.0109363
0.33124	-22.69	-26.7313	-0.0106925
0.33128	-21.8	-26.1225	-0.010449
0.33132	15.05	-25.5146	-0.0102058
0.33136	25.57	-24.9079	-0.00996316
0.3314	31.44	-24.3028	-0.0097211
0.33144	32.16	-23.6994	-0.00947974
0.33148	5.197	-23.098	-0.00923918
0.33152	-30.78	-22.4988	-0.0089995
0.33156	-21.19	-21.902	-0.00876079
0.3316	-15.52	-21.3078	-0.00852313
0.33164	-46.68	-20.7165	-0.00828659
0.33168	-40.15	-20.1282	-0.00805127
0.33172	6.555	-19.5431	-0.00781724
0.33176	5.342	-18.9615	-0.00758459
0.3318	8.001	-18.3835	-0.00735341
0.33184	24.01	-17.8094	-0.00712377
0.33188	22.62	-17.2394	-0.00689575
0.33192	57.91	-16.6735	-0.00666941
0.33196	30.43	-16.1121	-0.00644482
0.332	7.509	-15.5551	-0.00622204
0.33204	-8.849	-15.0027	-0.00600109
0.33208	-46.25	-14.4551	-0.00578204
0.33212	-23.88	-13.9123	-0.00556491
0.33216	-55.87	-13.3744	-0.00534975
0.3322	-5.496	-12.8415	-0.0051366
0.33224	2.336	-12.3138	-0.00492552
0.33228	4.012	-11.7914	-0.00471656
0.33232	10.51	-11.2744	-0.00450976
0.33236	21.5	-10.7629	-0.00430517
0.3324	28.84	-10.2571	-0.00410284
0.33244	20.6	-9.75697	-0.00390279
0.33248	34.16	-9.26264	-0.00370506
0.33252	17.65	-8.77418	-0.00350967
0.33256	-3.387	-8.29163	-0.00331665
0.3326	-11.74	-7.81504	-0.00312602
0.33264	-24.8	-7.34444	-0.00293778
0.33268	-25.15	-6.87988	-0.00275195
0.33272	-28.33	-6.4214	-0.00256856
0.33276	-17.78	-5.96904	-0.00238762
0.3328	1.006	-5.52288	-0.00220915
0.33284	13.72	-5.08296	-0.00203319
0.33288	14.36	-4.64936	-0.00185975
0.33292	25.43	-4.22213	-0.00168885
0.33296	23.03	-3.8013	-0.00152052
0.333	22.86	-3.38693	-0.00135477
0.33304	7.914	-2.97902	-0.00119161
0.33308	-17.09	-2.57761	-0.00103104
0.33312	12.97	-2.1827	-0.000873081
0.33316	-18.07	-1.79431	-0.000717724
0.3332	-12.63	-1.41245	-0.000564979
0.33324	9.879	-1.03713	-0.000414853
0.33328	38.64	-0.668381	-0.000267352
0.33332	39.97	-0.306203	-0.000122481
0.33336	66.81	0.0494013	1.97605e-05
0.3334	39.33	0.39845	0.00015938
0.33344	20.54	0.740982	0.000296393
0.33348	-21.25	1.07705	0.00043082
0.33352	-19.28	1.40671	0.000562685
0.33356	-15.9	1.73002	0.000692009
0.3336	-31.1	2.04703	0.000818814
0.33364	-11.57	2.35778	0.000943113
0.33368	-10.44	2.6623	0.00106492
0.33372	17.94	2.96061	0.00118424
0.33376	8.868	3.25273	0.00130109
0.3338	26.76	3.53869	0.00141548
0.33384	11.18	3.81851	0.0015274
0.33388	32.77	4.09223	0.00163689
0.33392	40.86	4.35989	0.00174395
0.33396	49.99	4.62153	0.00184861
0.334	43.98	4.87723	0.00195089
0.33404	7.943	5.12706	0.00205082
0.33408	-2.288	5.37112	0.00214845
0.33412	7.451	5.60949	0.0022438
0.33416	49.44	5.84229	0.00233692
0.3342	53.78	6.06961	0.00242784
0.33424	97.07	6.29156	0.00251663
0.33428	106.1	6.5083	0.00260332
0.33432	53.43	6.71998	0.00268799
0.33436	1.931	6.9268	0.00277072
0.3344	-36.83	7.12899	0.0028516
0.33444	-71.51	7.32676	0.0029307
0.33448	-97.92	7.52031	0.00300813
0.33452	-61.97	7.70982	0.00308393
0.33456	-57.43	7.89542	0.00315817
0.3346	-21.05	8.07722	0.00323089
0.33464	26.03	8.25531	0.00330212
0.33468	39.99	8.42976	0.00337191
0.33472	72.59	8.60066	0.00344027
0.33476	80.72	8.7681	0.00350724
0.3348	89.5	8.93219	0.00357288
0.33484	81.47	9.09308	0.00363723
0.33488	47.05	9.25095	0.00370038
0.33492	-3.184	9.40598	0.00376239
0.33496	-40.81	9.55839	0.00382336
0.335	-67.37	9.70838	0.00388335
0.33504	-87.6	9.85614	0.00394246
0.33508	-86.91	10.0018	0.00400074
0.33512	-15.9	10.1456	0.00405824
0.33516	25.95	10.2875	0.004115
0.3352	69.39	10.4276	0.00417105
0.33524	95.22	10.5661	0.00422644
0.33528	85.22	10.703	0.0042812
0.33532	46.35	10.8385	0.00433539
0.33536	3.521	10.9727	0.00438908
0.3354	-32.84	11.1058	0.00444232
0.33544	-75.81	11.238	0.0044952
0.33548	-88.62	11.3694	0.00454777
0.33552	-84.43	11.5002	0.00460008
0.33556	-57.69	11.6304	0.00465217
0.3356	-17.11	11.7602	0.00470406
0.33564	28.06	11.8894	0.00475576
0.33568	36.01	12.0182	0.00480728
0.33572	97.8	12.1466	0.00485863
0.33576	99.01	12.2745	0.00490982
0.3358	49.39	12.4022	0.00496087
0.33584	32.16	12.5295	0.00501182
0.33588	-2.028	12.6568	0.00506271
0.33592	-37.37	12.784	0.00511358
0.33596	-71.88	12.9112	0.00516448
0.336	-80.41	13.0386	0.00521545
0.33604	-99.28	13.1662	0.00526649
0.33608	-55.55	13.2941	0.00531763
0.33612	-15.61	13.4221	0.00536884
0.33616	27.13	13.5503	0.00542013
0.3362	69.42	13.6786	0.00547145
0.33624	95.48	13.807	0.0055228
0.33628	91.78	13.9354	0.00557416
0.33632	66.12	14.0638	0.00562553
0.33636	65.46	14.1923	0.00567691
0.3364	30.2	14.3208	0.00572833
0.33644	-2.491	14.4495	0.00577982
0.33648	-25.12	14.5785	0.00583139
0.33652	-38.1	14.7077	0.00588308
0.33656	-51.91	14.8372	0.0059349
0.3366	-62.14	14.9672	0.00598687
0.33664	-73.82	15.0974	0.00603898
0.33668	-114	15.2281	0.00609123
0.33672	-85.23	15.359	0.00614359
0.33676	-59.69	15.49	0.00619601
0.3368	-39.77	15.6211	0.00624844
0.33684	12.94	15.752	0.0063008
0.33688	59.18	15.8825	0.00635302
0.33692	70.05	16.0125	0.00640501
0.33696	66.64	16.1418	0.00645671
0.337	52.83	16.2701	0.00650804
0.33704	60.63	16.3974	0.00655894
0.33708	23.23	16.5234	0.00660937
0.33712	20.17	16.6482	0.00665927
0.33716	7.134	16.7715	0.0067086
0.3372	36.58	16.8933	0.00675731
0.33724	31.5	17.0134	0.00680535
0.33728	-6.999	17.1317	0.0068527
0.33732	-52.32	17.2482	0.00689929
0.33736	-108.4	17.3627	0.00694509
0.3374	-94.89	17.4751	0.00699003
0.33744	-53.7	17.5851	0.00703405
0.33748	13.81	17.6926	0.00707704
0.33752	65.08	17.7973	0.00711891
0.33756	102.6	17.8989	0.00715955
0.3376	99.07	17.9972	0.00719889
0.33764	97.02	18.092	0.00723681
0.33768	86.64	18.1832	0.00727327
0.33772	124.8	18.2705	0.00730819
0.33776	104.4	18.3538	0.00734153
0.3378	41.32	18.4332	0.00737327
0.33784	27.16	18.5084	0.00740337
0.33788	9.619	18.5795	0.00743182
0.33792	-59.69	18.6465	0.00745861
0.33796	-44.63	18.7093	0.00748372
0.338	-41.56	18.7678	0.00750712
0.33804	-2.808	18.822	0.00752878
0.33808	25.66	18.8717	0.00754866
0.33812	107.7	18.9168	0.00756671
0.33816	136	18.9572	0.00758288
0.3382	133.8	18.9929	0.00759715
0.33824	116.9	19.0238	0.0076095
0.33828	98.69	19.0498	0.00761993
0.33832	22.97	19.0711	0.00762846
0.33836	1.642	19.0878	0.00763511
0.3384	-53.96	19.0998	0.00763991
0.33844	-43.5	19.1072	0.00764289
0.33848	-28.39	19.1102	0.00764407
0.33852	20.4	19.1086	0.00764346
0.33856	-20.47	19.1026	0.00764105
0.3386	30.98	19.0921	0.00763685
0.33864	57.42	19.0771	0.00763085
0.33868	53.03	19.0576	0.00762305
0.33872	104.5	19.0337	0.00761346
0.33876	123.6	19.0052	0.00760208
0.3388	101.4	18.9723	0.00758894
0.33884	65.11	18.9352	0.00757407
0.33888	12.13	18.8938	0.00755752
0.33892	-31.94	18.8483	0.00753934
0.33896	-38.53	18.799	0.00751959
0.339	-83.91	18.7458	0.00749831
0.33904	-87.17	18.6889	0.00747555
0.33908	-31.48	18.6283	0.00745133
0.33912	22.28	18.5641	0.00742564
0.33916	66.35	18.4963	0.00739851
0.3392	62.59	18.4248	0.00736993
0.33924	109.7	18.3498	0.00733991
0.33928	62.36	18.2711	0.00730846
0.33932	49.01	18.189	0.0072756
0.33936	3.81	18.1035	0.00724139
0.3394	-3.329	18.0146	0.00720584
0.33944	-16.91	17.9225	0.007169
0.33948	-6.537	17.8273	0.00713091
0.33952	-5.381	17.729	0.00709158
0.33956	-52.35	17.6276	0.00705105
0.3396	-5.236	17.5233	0.00700934
0.33964	1.353	17.4161	0.00696645
0.33968	29.33	17.306	0.0069224
0.33972	65.63	17.193	0.00687719
0.33976	95.57	17.0771	0.00683083
0.3398	57.91	16.9583	0.00678333
0.33984	59.53	16.8368	0.00673473
0.33988	13.32	16.7126	0.00668505
0.33992	-32.84	16.5858	0.00663432
0.33996	-32.32	16.4565	0.0065826
0.34	-42.66	16.3247	0.00652989
0.34004	1.642	16.1906	0.00647624
0.34008	0.9198	16.0541	0.00642165
0.34012	16.06	15.9153	0.00636614
0.34016	38.14	15.7743	0.00630971
0.3402	76.55	15.631	0.00625239
0.34024	70.48	15.4854	0.00619417
0.34028	48.32	15.3377	0.0061351
0.34032	39.76	15.188	0.00607519
0.34036	40.37	15.0362	0.00601448
0.3404	6.989	14.8825	0.00595301
0.34044	-8.444	14.7271	0.00589083
0.34048	-28.7	14.5699	0.00582798
0.34052	-28.44	14.4112	0.00576449
0.34056	-59.92	14.251	0.00570039
0.3406	-35.15	14.0893	0.00563572
0.34064	4.532	13.9262	0.00557048
0.34068	37.19	13.7617	0.00550469
0.34072	83.29	13.5959	0.00543836
0.34076	77.45	13.4287	0.00537148
0.3408	83.29	13.2602	0.0053041
0.34084	48.61	13.0906	0.00523622
0.34088	22.25	12.9198	0.0051679
0.34092	-7.722	12.7479	0.00509918
0.34096	-57.43	12.5752	0.0050301
0.341	-45.55	12.4018	0.0049607
0.34104	-28.18	12.2276	0.00489102
0.34108	-19.72	12.0527	0.00482109
0.34112	30.4	11.8773	0.00475091
0.34116	25.89	11.7013	0.00468052
0.3412	51.09	11.5248	0.00460992
0.34124	28.92	11.3479	0.00453914
0.34128	7.596	11.1705	0.0044682
0.34132	7.48	10.9928	0.00439712
0.34136	20.86	10.8148	0.00432592
0.3414	11.79	10.6366	0.00425465
0.34144	-10.44	10.4583	0.00418332
0.34148	-9.253	10.2799	0.00411196
0.34152	-23.68	10.1015	0.00404059
0.34156	-21.8	9.9231	0.00396924
0.3416	8.607	9.7448	0.00389792
0.34164	-20.55	9.56661	0.00382664
0.34168	39.27	9.38856	0.00375542
0.34172	74.27	9.21066	0.00368426
0.34176	72.25	9.03296	0.00361318
0.3418	71.44	8.8555	0.0035422
0.34184	34.59	8.67836	0.00347135
0.34188	1.353	8.50165	0.00340066
0.34192	-19.92	8.32546	0.00333018
0.34196	-38.59	8.1499	0.00325996
0.342	-55.44	7.97507	0.00319003
0.34204	-31.31	7.80104	0.00312042
0.34208	-29.17	7.62788	0.00305115
0.34212	-12.52	7.45563	0.00298225
0.34216	-17.35	7.2843	0.00291372
0.3422	6.035	7.11393	0.00284557
0.34224	19.33	6.94452	0.00277781
0.34228	-5.699	6.77608	0.00271043
0.34232	11.47	6.60861	0.00264345
0.34236	-5.525	6.44214	0.00257685
0.3424	-36.51	6.27665	0.00251066
0.34244	-10.32	6.11216	0.00244486
0.34248	-16.59	5.94864	0.00237946
0.34252	-35.41	5.78609	0.00231444
0.34256	-25.99	5.62447	0.00224979
0.3426	-40.52	5.46373	0.00218549
0.34264	-21.65	5.30382	0.00212153
0.34268	-0.3808	5.14466	0.00205787
0.34272	35.8	4.98617	0.00199447
0.34276	67.42	4.82827	0.00193131
0.3428	48	4.67089	0.00186835
0.34284	28.64	4.51396	0.00180559
0.34288	33.12	4.35746	0.00174298
0.34292	20.72	4.20136	0.00168054
0.34296	8.896	4.04564	0.00161826
0.343	-1.999	3.8903	0.00155612
0.34304	-13.3	3.73532	0.00149413
0.34308	-15.58	3.5807	0.00143228
0.34312	-6.219	3.42642	0.00137057
0.34316	-38.24	3.27246	0.00130898
0.3432	12.88	3.1188	0.00124752
0.34324	-37.46	2.96539	0.00118616
0.34328	-13.42	2.8122	0.00112488
0.34332	36.41	2.65916	0.00106367
0.34336	52.16	2.50624	0.0010025
0.3434	27.08	2.35338	0.000941353
0.34344	-21.02	2.20056	0.000880222
0.34348	-57.63	2.04774	0.000819094
0.34352	-68.73	1.89489	0.000757955
0.34356	-46.68	1.74196	0.000696784
0.3436	-11.13	1.58888	0.000635551
0.34364	45.69	1.43555	0.000574219
0.34368	62.19	1.28188	0.000512751
0.34372	53.81	1.12778	0.000451114
0.34376	13.75	0.973207	0.000389283
0.3438	13	0.818097	0.000327239
0.34384	-6.017	0.662419	0.000264968
0.34388	0.1972	0.506138	0.000202455
0.34392	-30.9	0.349223	0.000139689
0.34396	-33.04	0.191633	7.66534e-05
0.344	1.411	0.0333254	1.33301e-05
0.34404	-12.78	-0.125756	-5.03024e-05
0.34408	-4.832	-0.28567	-0.000114268
0.34412	-1.71	-0.446479	-0.000178592
0.34416	-27.49	-0.608249	-0.0002433
0.3442	-16.51	-0.771049	-0.00030842
0.34424	15.8	-0.934953	-0.000373981
0.34428	41.64	-1.10004	-0.000440015
0.34432	69.16	-1.26638	-0.00050655
0.34436	46.18	-1.43402	-0.000573608
0.3444	16.32	-1.60301	-0.000641202
0.34444	-11.8	-1.77335	-0.00070934
0.34448	-32.26	-1.94507	-0.000778026
0.34452	-39.4	-2.11816	-0.000847265
0.34456	-37.92	-2.29266	-0.000917065
0.3446	-41.22	-2.4686	-0.000987441
0.34464	13.2	-2.64603	-0.00105841
0.34468	21.58	-2.82501	-0.00113
0.34472	25.57	-3.00559	-0.00120224
0.34476	9.272	-3.18782	-0.00127513
0.3448	3.723	-3.37175	-0.0013487
0.34484	-30.38	-3.5574	-0.00142296
0.34488	-41.13	-3.74481	-0.00149792
0.34492	1.584	-3.93403	-0.00157361
0.34496	9.446	-4.1251	-0.00165004
0.345	12.34	-4.31808	-0.00172723
0.34504	-0.8143	-4.51302	-0.00180521
0.34508	-19.54	-4.70995	-0.00188398
0.34512	-33.7	-4.90892	-0.00196357
0.34516	-26.57	-5.10998	-0.00204399
0.3452	-6.508	-5.31319	-0.00212528
0.34524	44.13	-5.51861	-0.00220744
0.34528	70.46	-5.72629	-0.00229051
0.34532	66.64	-5.93627	-0.00237451
0.34536	33.23	-6.14859	-0.00245943
0.3454	-19.74	-6.36321	-0.00254529
0.34544	-53.39	-6.58014	-0.00263206
0.34548	-54.71	-6.79935	-0.00271974
0.34552	-3.965	-7.02084	-0.00280833
0.34556	29.79	-7.2446	-0.00289784
0.3456	21.38	-7.47067	-0.00298827
0.34564	20.08	-7.69902	-0.00307961
0.34568	-8.271	-7.92965	-0.00317186
0.34572	-22.63	-8.16253	-0.00326501
0.34576	-44.74	-8.39766	-0.00335906
0.3458	-19.74	-8.63501	-0.00345401
0.34584	16.01	-8.87458	-0.00354983
0.34588	33.72	-9.11636	-0.00364654
0.34592	47.19	-9.36034	-0.00374413
0.34596	28.64	-9.60648	-0.00384259
0.346	-17.29	-9.85475	-0.0039419
0.34604	-45.7	-10.1051	-0.00404204
0.34608	-66.45	-10.3575	-0.00414298
0.34612	-52.98	-10.6118	-0.00424471
0.34616	-22.87	-10.868	-0.00434722
0.3462	44.82	-11.1262	-0.0044505
0.34624	56.64	-11.3864	-0.00455455
0.34628	38.92	-11.6484	-0.00465935
0.34632	15.6	-11.9122	-0.00476489
0.34636	-8.56	-12.1778	-0.00487113
0.3464	-25.61	-12.4451	-0.00497806
0.34644	-44.92	-12.7141	-0.00508563
0.34648	-25.09	-12.9845	-0.00519381
0.34652	9.561	-13.2564	-0.00530258
0.34656	27.42	-13.5298	-0.00541191
0.3466	0.02383	-13.8044	-0.00552176
0.34664	3.636	-14.0803	-0.00563212
0.34668	-17.26	-14.3573	-0.00574293
0.34672	-39.83	-14.6354	-0.00585416
0.34676	-31.91	-14.9144	-0.00596578
0.3468	-8.56	-15.1943	-0.00607774
0.34684	47.34	-15.475	-0.00619001
0.34688	58.52	-15.7564	-0.00630256
0.34692	34.01	-16.0384	-0.00641534
0.34696	27.45	-16.3207	-0.00652829
0.347	-2.664	-16.6034	-0.00664136
0.34704	-57.95	-16.8862	-0.00675447
0.34708	-53.18	-17.1689	-0.00686756
0.34712	-37.11	-17.4514	-0.00698055
0.34716	-3.965	-17.7335	-0.0070934
0.3472	25.46	-18.0151	-0.00720602
0.34724	40.31	-18.2959	-0.00731838
0.34728	18.55	-18.576	-0.00743039
0.34732	-8.675	-18.855	-0.00754199
0.34736	-14.11	-19.1327	-0.00765308
0.3474	-31.1	-19.409	-0.0077636
0.34744	-1.855	-19.6837	-0.00787346
0.34748	24.59	-19.9564	-0.00798257
0.34752	16.87	-20.2271	-0.00809084
0.34756	-24.89	-20.4955	-0.00819819
0.3476	-69.57	-20.7613	-0.00830452
0.34764	-48.27	-21.0243	-0.00840973
0.34768	-57.2	-21.2843	-0.00851374
0.34772	-78.12	-21.5411	-0.00861645
0.34776	-78.62	-21.7945	-0.00871779
0.3478	-50.41	-22.0442	-0.0088177
0.34784	1.642	-22.2902	-0.00891609
0.34788	45.92	-22.5323	-0.00901293
0.34792	5.371	-22.7703	-0.00910813
0.34796	-41.83	-23.0041	-0.00920164
0.348	-68.39	-23.2334	-0.00929337
0.34804	-71.1	-23.4582	-0.00938326
0.34808	-78.7	-23.6781	-0.00947125
0.34812	-65.44	-23.8932	-0.00955727
0.34816	-70.47	-24.1032	-0.00964127
0.3482	2.018	-24.308	-0.00972321
0.34824	3.521	-24.5076	-0.00980305
0.34828	-18.82	-24.7019	-0.00988075
0.34832	-82.58	-24.8907	-0.00995627
0.34836	-74.54	-25.0739	-0.0100296
0.3484	-34.54	-25.2515	-0.0101006
0.34844	-30.76	-25.4233	-0.0101693
0.34848	-20.15	-25.5894	-0.0102358
0.34852	-24.46	-25.7496	-0.0102998
0.34856	10.57	-25.9038	-0.0103615
0.3486	-35.32	-26.0521	-0.0104208
0.34864	-73.36	-26.1943	-0.0104777
0.34868	-99.37	-26.3303	-0.0105321
0.34872	-51.88	-26.4601	-0.010584
0.34876	-23.21	-26.5837	-0.0106335
0.3488	-5.438	-26.701	-0.0106804
0.34884	15.92	-26.812	-0.0107248
0.34888	-1.421	-26.9167	-0.0107667
0.34892	-43.88	-27.0151	-0.010806
0.34896	-53.27	-27.107	-0.0108428
0.349	-81.85	-27.1924	-0.010877
0.34904	-80.03	-27.2714	-0.0109086
0.34908	-30.78	-27.3438	-0.0109375
0.34912	-0.8721	-27.4097	-0.0109639
0.34916	-10.03	-27.4691	-0.0109876
0.3492	-4.485	-27.5219	-0.0110088
0.34924	-56.22	-27.5682	-0.0110273
0.34928	-59.63	-27.6079	-0.0110432
0.34932	-63.79	-27.6411	-0.0110564
0.34936	-41.13	-27.6677	-0.0110671
0.3494	-18.53	-27.6877	-0.0110751
0.34944	-13.36	-27.7012	-0.0110805
0.34948	-41.3	-27.7082	-0.0110833
0.34952	-14.54	-27.7086	-0.0110835
0.34956	-75.09	-27.7026	-0.011081
0.3496	-62.98	-27.6901	-0.0110761
0.34964	-44.83	-27.6712	-0.0110685
0.34968	-34.86	-27.6459	-0.0110584
0.34972	-20.52	-27.6142	-0.0110457
0.34976	-0.1496	-27.5762	-0.0110305
0.3498	-1.306	-27.532	-0.0110128
0.34984	18.67	-27.4816	-0.0109926
0.34988	24.82	-27.425	-0.01097
0.34992	-20.47	-27.3623	-0.0109449
0.34996	-35.73	-27.2933	-0.0109173
0.35	-55.58	-27.2182	-0.0108873
0.35004	-61.65	-27.137	-0.0108548
0.35008	-84.57	-27.0495	-0.0108198
0.35012	0.05273	-26.9559	-0.0107824
0.35016	-3.704	-26.8562	-0.0107425
0.3502	-44.98	-26.7504	-0.0107001
0.35024	-41.8	-26.6385	-0.0106554
0.35028	-23.04	-26.5205	-0.0106082
0.35032	-27.87	-26.3966	-0.0105586
0.35036	-11.59	-26.2666	-0.0105067
0.3504	27.08	-26.1308	-0.0104523
0.35044	4.359	-25.9889	-0.0103956
0.35048	36.32	-25.8412	-0.0103365
0.35052	12.74	-25.6875	-0.010275
0.35056	-6.884	-25.5279	-0.0102112
0.3506	-20.35	-25.3623	-0.0101449
0.35064	-22.52	-25.1906	-0.0100762
0.35068	-56.71	-25.0128	-0.0100051
0.35072	-65.41	-24.8289	-0.00993154
0.35076	1.527	-24.6387	-0.00985548
0.3508	-36.1	-24.4423	-0.00977692
0.35084	-2.375	-24.2396	-0.00969585
0.35088	-25.7	-24.0306	-0.00961226
0.35092	-29.74	-23.8153	-0.00952612
0.35096	-7.635	-23.5936	-0.00943742
0.351	-20.84	-23.3654	-0.00934615
0.35104	-15.21	-23.1307	-0.00925229
0.35108	-6.045	-22.8895	-0.00915581
0.35112	32.62	-22.6417	-0.0090567
0.35116	4.995	-22.3873	-0.00895493
0.3512	-36.74	-22.1262	-0.00885047
0.35124	-41.39	-21.8582	-0.00874329
0.35128	-70.09	-21.5834	-0.00863335
0.35132	-59.77	-21.3016	-0.00852064
0.35136	-32.66	-21.0128	-0.00840511
0.3514	-27.52	-20.7169	-0.00828676
0.35144	-55.87	-20.4139	-0.00816557
0.35148	-49.89	-20.1038	-0.00804153
0.35152	-52.95	-19.7866	-0.00791463
0.35156	-77.34	-19.4622	-0.00778487
0.3516	-102.2	-19.1306	-0.00765224
0.35164	-38.18	-18.7919	-0.00751677
0.35168	19.16	-18.4462	-0.00737847
0.35172	-20.26	-18.0934	-0.00723737
0.35176	-41.59	-17.7337	-0.00709349
0.3518	-75.06	-17.3671	-0.00694685
0.35184	-69.34	-16.9937	-0.00679749
0.35188	-50.78	-16.6136	-0.00664543
0.35192	-77.69	-16.2268	-0.00649073
0.35196	-56.94	-15.8336	-0.00633342
0.352	27.88	-15.4339	-0.00617357
0.35204	67.83	-15.0281	-0.00601124
0.35208	34.27	-14.6162	-0.00584647
0.35212	31.18	-14.1983	-0.00567933
0.35216	4.908	-13.7746	-0.00550984
0.3522	-52.4	-13.3451	-0.00533804
0.35224	-36.8	-12.9099	-0.00516396
0.35228	-53.79	-12.4691	-0.00498763
0.35232	-36.91	-12.0227	-0.00480909
0.35236	-25.26	-11.571	-0.00462838
0.3524	-26.88	-11.1139	-0.00444555
0.35244	-34.54	-10.6516	-0.00426065
0.35248	16.06	-10.1843	-0.00407373
0.35252	47.74	-9.71212	-0.00388485
0.35256	-5.728	-9.23511	-0.00369405
0.3526	58.9	-8.75343	-0.00350137
0.35264	98.26	-8.26717	-0.00330687
0.35268	85.25	-7.77639	-0.00311056
0.35272	36.03	-7.28115	-0.00291246
0.35276	56.18	-6.78143	-0.00271257
0.3528	5.139	-6.27724	-0.00251089
0.35284	-28.27	-5.76852	-0.00230741
0.35288	-85.75	-5.25524	-0.0021021
0.35292	-99.05	-4.73737	-0.00189495
0.35296	-69.4	-4.21491	-0.00168596
0.353	-34.43	-3.68787	-0.00147515
0.35304	-51.71	-3.15632	-0.00126253
0.35308	-43.5	-2.62033	-0.00104813
0.35312	-33.27	-2.07997	-0.000831987
0.35316	-21.83	-1.53535	-0.000614141
0.3532	28.29	-0.986593	-0.000394637
0.35324	77.13	-0.433806	-0.000173522
0.35328	44.13	0.122902	4.9161e-05
0.35332	42.68	0.683446	0.000273379
0.35336	24.3	1.24776	0.000499104
0.3534	-56.42	1.81579	0.000726315
0.35344	-87.55	2.38748	0.000954992
0.35348	-149.9	2.96277	0.00118511
0.35352	-183.9	3.54154	0.00141661
0.35356	-167.9	4.12362	0.00164945
0.3536	-172.8	4.7088	0.00188352
0.35364	-133.8	5.29676	0.0021187
0.35368	-75.26	5.88713	0.00235485
0.35372	-2.404	6.47951	0.0025918
0.35376	29.91	7.07344	0.00282938
0.3538	28.75	7.66847	0.00306739
0.35384	61.35	8.26413	0.00330565
0.35388	29.24	8.85999	0.003544
0.35392	5.688	9.45561	0.00378225
0.35396	-16.57	10.0506	0.00402023
0.354	-61.74	10.6445	0.00425779
0.35404	-86.68	11.2368	0.00449473
0.35408	-102.9	11.8272	0.00473089
0.35412	-113.5	12.4151	0.00496605
0.35416	-71.07	13	0.00519999
0.3542	-5.381	13.5812	0.00543249
0.35424	57.62	14.1582	0.0056633
0.35428	132.6	14.7304	0.00589216
0.35432	179	15.2971	0.00611884
0.35436	233.7	15.8578	0.00634312
0.3544	207.9	16.412	0.00656478
0.35444	213.1	16.9592	0.00678368
0.35448	162.7	17.4991	0.00699966
0.35452	61.53	18.0315	0.00721262
0.35456	0.7175	18.5562	0.00742246
0.3546	-44.72	19.0728	0.00762912
0.35464	-35.24	19.5813	0.0078325
0.35468	-27.66	20.0813	0.00803252
0.35472	-24.72	20.5727	0.00822908
0.35476	5.399	21.0552	0.00842208
0.3548	34.5	21.5285	0.00861141
0.35484	72.85	21.9924	0.00879695
0.35488	120.3	22.4465	0.0089786
0.35492	130.5	22.8906	0.00915625
0.35496	98.61	23.3245	0.00932982
0.355	95.51	23.7481	0.00949923
0.35504	68.35	24.1611	0.00966443
0.35508	48.17	24.5634	0.00982536
0.35512	34.85	24.9549	0.00998198
0.35516	62.42	25.3356	0.0101342
0.3552	91.44	25.7053	0.0102821
0.35524	106.9	26.064	0.0104256
0.35528	121	26.4117	0.0105647
0.35532	155.1	26.7482	0.0106993
0.35536	137.2	27.0737	0.0108295
0.3554	113.7	27.3882	0.0109553
0.35544	101.7	27.6919	0.0110768
0.35548	59.01	27.9848	0.0111939
0.35552	34.97	28.2672	0.0113069
0.35556	-3.936	28.5392	0.0114157
0.3556	-36.16	28.801	0.0115204
0.35564	-50.64	29.0529	0.0116212
0.35568	-19.08	29.2949	0.011718
0.35572	-28.94	29.5272	0.0118109
0.35576	-6.884	29.7499	0.0118999
0.3558	-6.999	29.963	0.0119852
0.35584	-8.3	30.1668	0.0120667
0.35588	-1.421	30.3611	0.0121444
0.35592	-1.595	30.546	0.0122184
0.35596	23.66	30.7217	0.0122887
0.356	35.66	30.888	0.0123552
0.35604	36.79	31.045	0.012418
0.35608	70.2	31.1927	0.0124771
0.35612	56.79	31.3311	0.0125325
0.35616	48.29	31.4603	0.0125841
0.3562	67.94	31.5803	0.0126321
0.35624	73.17	31.6912	0.0126765
0.35628	85.08	31.7929	0.0127172
0.35632	93.78	31.8856	0.0127543
0.35636	99.99	31.9694	0.0127878
0.3564	77.59	32.0445	0.0128178
0.35644	76.29	32.1108	0.0128443
0.35648	61.27	32.1687	0.0128675
0.35652	39.62	32.2183	0.0128873
0.35656	19.36	32.2598	0.0129039
0.3566	10.23	32.2935	0.0129174
0.35664	7.336	32.3193	0.0129277
0.35668	-6.739	32.3377	0.0129351
0.35672	-6.306	32.3487	0.0129395
0.35676	12.51	32.3526	0.012941
0.3568	11.44	32.3494	0.0129398
0.35684	23	32.3393	0.0129357
0.35688	11.27	32.3224	0.012929
0.35692	-2.751	32.2989	0.0129196
0.35696	-13.94	32.2689	0.0129076
0.357	33.38	32.2324	0.012893
0.35704	26.12	32.1896	0.0128758
0.35708	44.01	32.1406	0.0128562
0.35712	64.36	32.0854	0.0128341
0.35716	43.87	32.0241	0.0128096
0.3572	67.59	31.9568	0.0127827
0.35724	49.7	31.8837	0.0127535
0.35728	56.76	31.8049	0.0127219
0.35732	39.01	31.7204	0.0126881
0.35736	33.17	31.6304	0.0126522
0.3574	8.925	31.5351	0.012614
0.35744	-11.88	31.4346	0.0125738
0.35748	30.31	31.3289	0.0125316
0.35752	23.9	31.2184	0.0124873
0.35756	30.51	31.1029	0.0124412
0.3576	17.02	30.9828	0.0123931
0.35764	37.02	30.858	0.0123432
0.35768	41.55	30.7287	0.0122915
0.35772	25.43	30.5949	0.012238
0.35776	60.25	30.4569	0.0121828
0.3578	1.498	30.3147	0.0121259
0.35784	-2.23	30.1684	0.0120673
0.35788	-4.774	30.0181	0.0120072
0.35792	40.31	29.8639	0.0119456
0.35796	15.02	29.706	0.0118824
0.358	4.735	29.5444	0.0118178
0.35804	0.1394	29.3792	0.0117517
0.35808	45.43	29.2104	0.0116841
0.35812	39.24	29.0381	0.0116152
0.35816	31.09	28.8624	0.011545
0.3582	30.31	28.6834	0.0114733
0.35824	36.93	28.5011	0.0114004
0.35828	38.32	28.3156	0.0113262
0.35832	46.12	28.1269	0.0112508
0.35836	23.03	27.9352	0.0111741
0.3584	1.874	27.7406	0.0110962
0.35844	24.5	27.5431	0.0110172
0.35848	47.02	27.3427	0.0109371
0.35852	23.55	27.1397	0.0108559
0.35856	-7.548	26.934	0.0107736
0.3586	10.02	26.7257	0.0106903
0.35864	40.23	26.5149	0.010606
0.35868	45.57	26.3017	0.0105207
0.35872	3.405	26.0861	0.0104344
0.35876	27.22	25.8682	0.0103473
0.3588	48.49	25.648	0.0102592
0.35884	65.66	25.4256	0.0101703
0.35888	25.02	25.2012	0.0100805
0.35892	55.08	24.9747	0.00998989
0.35896	35.02	24.7463	0.00989854
0.359	40.75	24.5161	0.00980645
0.35904	51.79	24.2842	0.00971367
0.35908	23.55	24.0506	0.00962025
0.35912	23.78	23.8156	0.00952623
0.35916	-12.49	23.5791	0.00943166
0.3592	4.648	23.3415	0.00933659
0.35924	12.8	23.1027	0.00924106
0.35928	28.52	22.8628	0.00914512
0.35932	8.116	22.622	0.0090488
0.35936	44.91	22.3803	0.00895213
0.3594	20.86	22.1379	0.00885517
0.35944	17.57	21.8949	0.00875795
0.35948	21.3	21.6513	0.00866051
0.35952	12.86	21.4072	0.00856288
0.35956	19.36	21.1628	0.00846512
0.3596	26.27	20.9181	0.00836725
0.35964	9.908	20.6733	0.00826932
0.35968	13.2	20.4284	0.00817136
0.35972	10.95	20.1835	0.00807341
0.35976	-0.4675	19.9388	0.0079755
0.3598	42.16	19.6942	0.00787768
0.35984	9.503	19.4499	0.00777998
0.35988	19.68	19.206	0.00768242
0.35992	8.665	18.9626	0.00758504
0.35996	5.371	18.7197	0.00748787
0.36	-10.9	18.4774	0.00739095
0.36004	0.3128	18.2358	0.00729431
0.36008	-19.86	17.9949	0.00719796
0.36012	4.619	17.7548	0.00710193
0.36016	31.55	17.5156	0.00700624
0.3602	55.75	17.2773	0.00691091
0.36024	40.34	17.0399	0.00681595
0.36028	11.76	16.8034	0.00672137
0.36032	21.56	16.5681	0.00662722
0.36036	12.88	16.3338	0.00653351
0.3604	17.16	16.1007	0.00644026
0.36044	15.08	15.8688	0.00634751
0.36048	25.43	15.6382	0.00625528
0.36052	14.13	15.409	0.0061636
0.36056	33.58	15.1812	0.00607248
0.3606	28.58	14.9549	0.00598197
0.36064	19.27	14.7302	0.00589208
0.36068	24.65	14.5071	0.00580286
0.36072	11.87	14.2858	0.00571433
0.36076	-15.26	14.0663	0.00562652
0.3608	20.66	13.8487	0.00553948
0.36084	-14.28	13.6331	0.00545322
0.36088	6.642	13.4195	0.00536779
0.36092	19.94	13.208	0.0052832
0.36096	22.05	12.9987	0.00519948
0.361	9.07	12.7916	0.00511666
0.36104	18.17	12.5869	0.00503476
0.36108	31.12	12.3845	0.00495381
0.36112	50.57	12.1846	0.00487385
0.36116	18.12	11.9872	0.00479489
0.3612	-2.837	11.7925	0.00471699
0.36124	-23.91	11.6004	0.00464016
0.36128	-42.49	11.4111	0.00456445
0.36132	-16.45	11.2247	0.00448988
0.36136	-35.41	11.0412	0.00441649
0.3614	16.38	10.8607	0.00434427
0.36144	11.93	10.6831	0.00427325
0.36148	32.13	10.5086	0.00420344
0.36152	13.55	10.3371	0.00413484
0.36156	16.82	10.1687	0.00406747
0.3616	-7.23	10.0034	0.00400135
0.36164	-1.479	9.84121	0.00393648
0.36168	24.85	9.68222	0.00387289
0.36172	23.09	9.52644	0.00381058
0.36176	14.79	9.37391	0.00374956
0.3618	-0.4675	9.22465	0.00368986
0.36184	-22.61	9.07871	0.00363148
0.36188	-39.95	8.93612	0.00357445
0.36192	-31.54	8.7969	0.00351876
0.36196	-57.75	8.66105	0.00346442
0.362	-13.24	8.52857	0.00341143
0.36204	1.151	8.39941	0.00335976
0.36208	17.71	8.27354	0.00330941
0.36212	29.91	8.1509	0.00326036
0.36216	28	8.03147	0.00321259
0.3622	-7.173	7.91519	0.00316608
0.36224	-25.44	7.80203	0.00312081
0.36228	2.018	7.69196	0.00307678
0.36232	-33.33	7.58493	0.00303397
0.36236	-25.03	7.48088	0.00299235
0.3624	8.752	7.37975	0.0029519
0.36244	2.163	7.28146	0.00291258
0.36248	14.27	7.18594	0.00287437
0.36252	-23.47	7.0931	0.00283724
0.36256	5.92	7.00285	0.00280114
0.3626	4.041	6.91512	0.00276605
0.36264	-9.485	6.82981	0.00273193
0.36268	25.2	6.74683	0.00269873
0.36272	22.19	6.66608	0.00266643
0.36276	10.37	6.58748	0.00263499
0.3628	31.93	6.51092	0.00260437
0.36284	44.47	6.43634	0.00257454
0.36288	67.45	6.36367	0.00254547
0.36292	39.62	6.29284	0.00251713
0.36296	20.95	6.22382	0.00248953
0.363	-11.54	6.15658	0.00246263
0.36304	-38.96	6.09111	0.00243644
0.36308	-25.9	6.02737	0.00241095
0.36312	-42.23	5.96533	0.00238613
0.36316	-38.24	5.90493	0.00236197
0.3632	-6.161	5.84611	0.00233844
0.36324	-24.86	5.78877	0.00231551
0.36328	-32.69	5.73282	0.00229313
0.36332	-42.17	5.67814	0.00227126
0.36336	-22.58	5.62463	0.00224985
0.3634	-10.93	5.57213	0.00222885
0.36344	44.21	5.52051	0.0022082
0.36348	59.82	5.4696	0.00218784
0.36352	60.25	5.41928	0.00216771
0.36356	46.15	5.36942	0.00214777
0.3636	-16.25	5.3199	0.00212796
0.36364	-23.88	5.27066	0.00210826
0.36368	-50.44	5.22157	0.00208863
0.36372	-52.98	5.17255	0.00206902
0.36376	-31.02	5.12345	0.00204938
0.3638	-13.16	5.07414	0.00202966
0.36384	2.798	5.02446	0.00200978
0.36388	21.15	4.97423	0.00198969
0.36392	23.69	4.92329	0.00196932
0.36396	8.434	4.87148	0.00194859
0.364	7.914	4.81862	0.00192745
0.36404	9.532	4.76458	0.00190583
0.36408	-3.531	4.70918	0.00188367
0.36412	11.53	4.65228	0.00186091
0.36416	5.544	4.59372	0.00183749
0.3642	-30	4.53335	0.00181334
0.36424	-36.1	4.471	0.0017884
0.36428	-26.36	4.40651	0.00176261
0.36432	-21.28	4.3397	0.00173588
0.36436	-0.9299	4.27037	0.00170815
0.3644	36.32	4.19831	0.00167932
0.36444	45.66	4.12333	0.00164933
0.36448	65.22	4.04524	0.0016181
0.36452	53.64	3.96385	0.00158554
0.36456	38.55	3.87902	0.00155161
0.3646	20.66	3.7906	0.00151624
0.36464	46.32	3.69847	0.00147939
0.36468	27.68	3.60253	0.00144101
0.36472	39.3	3.50267	0.00140107
0.36476	1.209	3.3988	0.00135952
0.3648	-39.57	3.29084	0.00131634
0.36484	-44.83	3.17872	0.00127149
0.36488	-38.27	3.06235	0.00122494
0.36492	-25.84	2.9416	0.00117664
0.36496	13	2.81637	0.00112655
0.365	26.38	2.68651	0.0010746
0.36504	-8.358	2.5519	0.00102076
0.36508	-2.317	2.4124	0.00096496
0.36512	-13.39	2.26789	0.000907156
0.36516	-42.92	2.11823	0.000847294
0.3652	-17.23	1.96329	0.000785316
0.36524	-0.9877	1.80291	0.000721163
0.36528	10.43	1.63693	0.00065477
0.36532	47.94	1.46518	0.000586074
0.36536	65.22	1.28753	0.000515012
0.3654	67.13	1.10382	0.000441529
0.36544	41.38	0.913949	0.00036558
0.36548	25.98	0.717813	0.000287125
0.36552	34.88	0.515338	0.000206135
0.36556	89.47	0.306463	0.000122585
0.3656	99.7	0.0911467	3.64587e-05
0.36564	115	-0.130622	-5.22489e-05
0.36568	144.7	-0.358815	-0.000143526
0.36572	85.31	-0.593357	-0.000237343
0.36576	6.266	-0.834129	-0.000333652
0.3658	24.1	-1.08098	-0.000432392
0.36584	-0.2074	-1.33375	-0.000533498
0.36588	-8.849	-1.59225	-0.000636901
0.36592	28.43	-1.85632	-0.000742529
0.36596	15.08	-2.12578	-0.000850311
0.366	15.83	-2.40043	-0.000960173
0.36604	-10.26	-2.6801	-0.00107204
0.36608	-44.98	-2.96458	-0.00118583
0.36612	-62.46	-3.25368	-0.00130147
0.36616	-56.71	-3.54722	-0.00141889
0.3662	-21.62	-3.84506	-0.00153802
0.36624	-10.96	-4.14704	-0.00165881
0.36628	-0.5542	-4.45303	-0.00178121
0.36632	19.21	-4.76291	-0.00190517
0.36636	13.61	-5.07655	-0.00203062
0.3664	39.73	-5.39381	-0.00215752
0.36644	15.14	-5.71454	-0.00228582
0.36648	3.752	-6.03859	-0.00241543
0.36652	-5.438	-6.36578	-0.00254631
0.36656	-28.88	-6.69594	-0.00267838
0.3666	-12.89	-7.0289	-0.00281156
0.36664	6.209	-7.3645	-0.0029458
0.36668	44.04	-7.70256	-0.00308103
0.36672	63.81	-8.04292	-0.00321717
0.36676	24.91	-8.38537	-0.00335415
0.3668	5.891	-8.7297	-0.00349188
0.36684	20.63	-9.07569	-0.00363028
0.36688	-11.1	-9.4231	-0.00376924
0.36692	-11.48	-9.77168	-0.00390867
0.36696	12.1	-10.1212	-0.00404847
0.367	24.1	-10.4714	-0.00418854
0.36704	24.16	-10.8219	-0.00432878
0.36708	28.23	-11.1727	-0.00446907
0.36712	12.36	-11.5233	-0.0046093
0.36716	-30.24	-11.8734	-0.00474936
0.3672	-41.91	-12.2228	-0.00488912
0.36724	-40.64	-12.5712	-0.00502847
0.36728	-16.74	-12.9182	-0.00516728
0.36732	21.67	-13.2636	-0.00530544
0.36736	36.18	-13.6071	-0.00544284
0.3674	58.78	-13.9484	-0.00557937
0.36744	36.64	-14.2872	-0.00571488
0.36748	-6.219	-14.6232	-0.00584926
0.36752	-90.38	-14.9559	-0.00598236
0.36756	-121.9	-15.2851	-0.00611403
0.3676	-94.4	-15.6104	-0.00624415
0.36764	-128.6	-15.9315	-0.0063726
0.36768	-72.92	-16.2482	-0.00649928
0.36772	-42.43	-16.5602	-0.0066241
0.36776	-93.21	-16.8674	-0.00674697
0.3678	-77.29	-17.1696	-0.00686783
0.36784	-42.35	-17.4665	-0.00698662
0.36788	-31.97	-17.7582	-0.00710328
[truncated: 23,003 more rows]

## Sheet: Sheet2
0.52976	-8.444	0.621164	0.000248466
0.5298	-14.51	1.78193	0.000712771
0.52984	20.17	2.9725	0.001189
0.52988	-10.44	4.19325	0.0016773
0.52992	19.88	5.44454	0.00217782
0.52996	-28.07	6.72675	0.0026907
0.53	-7.751	8.04022	0.00321609
0.53004	-6.884	9.38532	0.00375413
0.53008	34.56	10.7624	0.00430496
0.53012	51.64	12.1718	0.00486872
0.53016	14.76	13.6139	0.00544555
0.5302	4.214	15.089	0.0060356
0.53024	-5.323	16.5975	0.00663901
0.53028	-13.01	18.1398	0.00725592
0.53032	-10.7	19.7162	0.00788649
0.53036	31.53	21.3271	0.00853084
0.5304	14.68	22.9728	0.00918911
0.53044	15.51	24.6536	0.00986143
0.53048	-9.167	26.3698	0.0105479
0.53052	36.76	28.1219	0.0112488
0.53056	21.5	29.9101	0.011964
0.5306	12.71	31.7346	0.0126939
0.53064	15.17	33.5959	0.0134384
0.53068	26.56	35.4943	0.0141977
0.53072	31.93	37.4299	0.014972
0.53076	28.9	39.4032	0.0157613
0.5308	-0.1496	41.4145	0.0165658
0.53084	32.94	43.4639	0.0173856
0.53088	13.41	45.5518	0.0182207
0.53092	45.92	47.6784	0.0190714
0.53096	3.954	49.8441	0.0199376
0.531	36.67	52.049	0.0208196
0.53104	57.36	54.2934	0.0217174
0.53108	48.87	56.5775	0.022631
0.53112	38.26	58.9016	0.0235606
0.53116	25.83	61.2659	0.0245063
0.5312	29.76	63.6705	0.0254682
0.53124	40.23	66.1157	0.0264463
0.53128	37.42	68.6018	0.0274407
0.53132	43.12	71.1288	0.0284515
0.53136	50.75	73.697	0.0294788
0.5314	53.55	76.3064	0.0305226
0.53144	28.92	78.9573	0.0315829
0.53148	62.22	81.6498	0.0326599
0.53152	58.23	84.384	0.0337536
0.53156	52.39	87.1601	0.034864
0.5316	26.09	89.978	0.0359912
0.53164	37.94	92.8379	0.0371352
0.53168	75.72	95.74	0.038296
0.53172	24.88	98.6841	0.0394736
0.53176	38.55	101.67	0.0406681
0.5318	71.35	104.699	0.0418795
0.53184	75.77	107.769	0.0431077
0.53188	67.02	110.882	0.0443527
0.53192	46.12	114.036	0.0456146
0.53196	57.77	117.233	0.0468932
0.532	77.31	120.472	0.0481886
0.53204	72.68	123.752	0.0495007
0.53208	69.01	127.074	0.0508295
0.53212	61.67	130.437	0.0521748
0.53216	88.81	133.842	0.0535366
0.5322	87.36	137.287	0.0549149
0.53224	78.72	140.774	0.0563095
0.53228	91.76	144.301	0.0577204
0.53232	69.18	147.868	0.0591474
0.53236	80.17	151.476	0.0605904
0.5324	88.2	155.123	0.0620494
0.53244	105.5	158.81	0.063524
0.53248	74.76	162.536	0.0650143
0.53252	73.78	166.3	0.0665201
0.53256	95.77	170.103	0.0680411
0.5326	78.37	173.943	0.0695771
0.53264	97.74	177.82	0.0711281
0.53268	94.01	181.734	0.0726938
0.53272	96.87	185.685	0.0742739
0.53276	100.9	189.67	0.0758681
0.5328	135.4	193.691	0.0774764
0.53284	88.14	197.746	0.0790983
0.53288	72.71	201.834	0.0807336
0.53292	111.9	205.955	0.082382
0.53296	94.82	210.108	0.0840432
0.533	96.38	214.292	0.0857169
0.53304	86	218.506	0.0874026
0.53308	112.9	222.75	0.0891001
0.53312	102.9	227.022	0.0908089
0.53316	116.1	231.322	0.0925286
0.5332	92.62	235.647	0.0942589
0.53324	84.36	239.998	0.0959991
0.53328	103.9	244.373	0.097749
0.53332	104.9	248.77	0.099508
0.53336	100.3	253.189	0.101276
0.5334	106.6	257.628	0.103051
0.53344	97.83	262.085	0.104834
0.53348	93.63	266.56	0.106624
0.53352	97.13	271.051	0.10842
0.53356	112.9	275.555	0.110222
0.5336	111.8	280.072	0.112029
0.53364	108.5	284.6	0.11384
0.53368	111	289.136	0.115655
0.53372	109.1	293.68	0.117472
0.53376	102.3	298.228	0.119291
0.5338	125.2	302.78	0.121112
0.53384	119.6	307.332	0.122933
0.53388	110.6	311.883	0.124753
0.53392	114.7	316.431	0.126572
0.53396	110.9	320.972	0.128389
0.534	109.4	325.506	0.130202
0.53404	131.6	330.029	0.132011
0.53408	124.9	334.538	0.133815
0.53412	112.6	339.031	0.135613
0.53416	128.9	343.506	0.137402
0.5342	125.6	347.959	0.139184
0.53424	112	352.388	0.140955
0.53428	124.5	356.789	0.142716
0.53432	124	361.16	0.144464
0.53436	134.3	365.497	0.146199
0.5344	126.2	369.797	0.147919
0.53444	129.1	374.056	0.149623
0.53448	116.2	378.272	0.151309
0.53452	120.4	382.44	0.152976
0.53456	109.2	386.557	0.154623
0.5346	135.2	390.619	0.156248
0.53464	137.9	394.622	0.157849
0.53468	151.7	398.563	0.159425
0.53472	177	402.436	0.160974
0.53476	145.4	406.238	0.162495
0.5348	163	409.965	0.163986
0.53484	151.8	413.613	0.165445
0.53488	232.4	417.175	0.16687
0.53492	529.9	420.649	0.16826
0.53496	993.6	424.03	0.169612
0.535	1444	427.313	0.170925
0.53504	1796	430.493	0.172197
0.53508	2103	433.567	0.173427
0.53512	2318	436.531	0.174612
0.53516	2519	439.383	0.175753
0.5352	2714	442.121	0.176848
0.53524	2700	444.743	0.177897
0.53528	2610	447.249	0.1789
0.53532	2412	449.64	0.179856
0.53536	2089	451.918	0.180767
0.5354	1809	454.083	0.181633
0.53544	1726	456.14	0.182456
0.53548	1523	458.092	0.183237
0.53552	1260	459.942	0.183977
0.53556	1137	461.696	0.184678
0.5356	935.6	463.357	0.185343
0.53564	709.9	464.93	0.185972
0.53568	676.9	466.421	0.186568
0.53572	629.9	467.835	0.187134
0.53576	470.1	469.177	0.187671
0.5358	318.8	470.453	0.188181
0.53584	165.8	471.667	0.188667
0.53588	19.39	472.826	0.18913
0.53592	-13.99	473.935	0.189574
0.53596	-37.35	474.998	0.189999
0.536	-107.9	476.02	0.190408
0.53604	-105.6	477.006	0.190802
0.53608	-52.75	477.961	0.191184
0.53612	-33.44	478.888	0.191555
0.53616	-25.29	479.791	0.191917
0.5362	17.28	480.675	0.19227
0.53624	70.08	481.543	0.192617
0.53628	121.7	482.398	0.192959
0.53632	147.7	483.244	0.193298
0.53636	148.3	484.083	0.193633
0.5364	160.1	484.918	0.193967
0.53644	145.8	485.753	0.194301
0.53648	161.1	486.59	0.194636
0.53652	163	487.431	0.194972
0.53656	162	488.279	0.195312
0.5366	152.5	489.136	0.195654
0.53664	191.4	490.004	0.196002
0.53668	224.8	490.886	0.196354
0.53672	181.6	491.783	0.196713
0.53676	215.2	492.697	0.197079
0.5368	272	493.629	0.197452
0.53684	225.9	494.582	0.197833
0.53688	210.7	495.556	0.198222
0.53692	234.7	496.553	0.198621
0.53696	201.8	497.574	0.19903
0.537	166.9	498.621	0.199448
0.53704	193.1	499.694	0.199878
0.53708	184	500.794	0.200318
0.53712	132.3	501.922	0.200769
0.53716	102.9	503.079	0.201232
0.5372	91.67	504.265	0.201706
0.53724	90.77	505.481	0.202192
0.53728	84.53	506.726	0.20269
0.53732	43.58	508	0.2032
0.53736	63.14	509.304	0.203722
0.5374	97.31	510.637	0.204255
0.53744	119.4	511.999	0.204799
0.53748	111.4	513.388	0.205355
0.53752	109.8	514.804	0.205922
0.53756	128.5	516.247	0.206499
0.5376	92.97	517.714	0.207085
0.53764	67.57	519.204	0.207682
0.53768	99.01	520.716	0.208287
0.53772	148.1	522.249	0.2089
0.53776	120.5	523.8	0.20952
0.5378	126.4	525.367	0.210147
0.53784	170.7	526.949	0.21078
0.53788	149.6	528.542	0.211417
0.53792	178.6	530.145	0.212058
0.53796	213.2	531.755	0.212702
0.538	225.7	533.369	0.213348
0.53804	362.6	534.984	0.213994
0.53808	554.6	536.598	0.214639
0.53812	759	538.206	0.215283
0.53816	999.2	539.807	0.215923
0.5382	1235	541.397	0.216559
0.53824	1370	542.974	0.217189
0.53828	1455	544.534	0.217814
0.53832	1497	546.077	0.218431
0.53836	1561	547.599	0.21904
0.5384	1481	549.1	0.21964
0.53844	1311	550.578	0.220231
0.53848	1047	552.034	0.220813
0.53852	864.9	553.465	0.221386
0.53856	673.4	554.873	0.221949
0.5386	525.9	556.257	0.222503
0.53864	501.5	557.617	0.223047
0.53868	499.5	558.954	0.223581
0.53872	611.9	560.266	0.224106
0.53876	723.5	561.554	0.224622
0.5388	809.2	562.819	0.225127
0.53884	834.3	564.059	0.225624
0.53888	887.8	565.275	0.22611
0.53892	934	566.468	0.226587
0.53896	978.4	567.638	0.227055
0.539	995.1	568.785	0.227514
0.53904	952.6	569.91	0.227964
0.53908	936.1	571.014	0.228406
0.53912	970.4	572.098	0.228839
0.53916	979.4	573.163	0.229265
0.5392	922.2	574.21	0.229684
0.53924	866.9	575.241	0.230096
0.53928	759	576.257	0.230503
0.53932	593.4	577.26	0.230904
0.53936	460	578.252	0.231301
0.5394	321.3	579.235	0.231694
0.53944	189.9	580.21	0.232084
0.53948	91.15	581.178	0.232471
0.53952	-33.56	582.143	0.232857
0.53956	-117	583.104	0.233241
0.5396	-109.5	584.062	0.233625
0.53964	-81.42	585.019	0.234008
0.53968	-14.74	585.975	0.23439
0.53972	124.4	586.931	0.234772
0.53976	286.3	587.885	0.235154
0.5398	335.1	588.839	0.235536
0.53984	360.4	589.791	0.235916
0.53988	435.4	590.742	0.236297
0.53992	490.3	591.691	0.236676
0.53996	496.1	592.637	0.237055
0.54	633.8	593.579	0.237432
0.54004	702	594.518	0.237807
0.54008	781.7	595.453	0.238181
0.54012	871.8	596.382	0.238553
0.54016	957.4	597.305	0.238922
0.5402	932.5	598.223	0.239289
0.54024	932.1	599.134	0.239654
0.54028	891.5	600.039	0.240016
0.54032	806.9	600.938	0.240375
0.54036	696.6	601.83	0.240732
0.5404	541.2	602.717	0.241087
0.54044	423.8	603.597	0.241439
0.54048	345.5	604.472	0.241789
0.54052	315	605.341	0.242136
0.54056	264.6	606.205	0.242482
0.5406	289.6	607.063	0.242825
0.54064	309.6	607.915	0.243166
0.54068	362.9	608.761	0.243504
0.54072	411.5	609.601	0.24384
0.54076	465.7	610.433	0.244173
0.5408	557.2	611.258	0.244503
0.54084	668	612.074	0.244829
0.54088	776	612.881	0.245152
0.54092	888	613.678	0.245471
0.54096	943.7	614.465	0.245786
0.541	1046	615.241	0.246096
0.54104	1092	616.006	0.246402
0.54108	1062	616.759	0.246704
0.54112	1042	617.501	0.247
0.54116	992.7	618.231	0.247293
0.5412	925.5	618.951	0.24758
0.54124	888.4	619.66	0.247864
0.54128	835	620.359	0.248143
0.54132	746.9	621.048	0.248419
0.54136	665.2	621.729	0.248692
0.5414	572.2	622.403	0.248961
0.54144	509.2	623.069	0.249228
0.54148	469.7	623.73	0.249492
0.54152	436.5	624.385	0.249754
0.54156	347.2	625.036	0.250014
0.5416	351.6	625.683	0.250273
0.54164	380.7	626.327	0.250531
0.54168	383	626.967	0.250787
0.54172	411.3	627.605	0.251042
0.54176	423.6	628.241	0.251297
0.5418	449.6	628.875	0.25155
0.54184	482.8	629.507	0.251803
0.54188	540.1	630.136	0.252054
0.54192	630.2	630.764	0.252305
0.54196	662.3	631.389	0.252555
0.542	743.2	632.012	0.252805
0.54204	773.6	632.632	0.253053
0.54208	774.9	633.25	0.2533
0.54212	730.8	633.866	0.253546
0.54216	688.4	634.48	0.253792
0.5422	701.7	635.091	0.254036
0.54224	686.4	635.7	0.25428
0.54228	674.3	636.308	0.254523
0.54232	667.1	636.913	0.254765
0.54236	715.9	637.517	0.255007
0.5424	662.1	638.12	0.255248
0.54244	697	638.722	0.255489
0.54248	716.1	639.323	0.255729
0.54252	703.1	639.923	0.255969
0.54256	675.8	640.523	0.256209
0.5426	674.4	641.124	0.256449
0.54264	661	641.724	0.25669
0.54268	662.4	642.326	0.25693
0.54272	646.7	642.928	0.257171
0.54276	677.6	643.532	0.257413
0.5428	703.5	644.138	0.257655
0.54284	695.2	644.746	0.257899
0.54288	718.4	645.357	0.258143
0.54292	720.2	645.971	0.258388
0.54296	693.4	646.589	0.258635
0.543	667	647.21	0.258884
0.54304	620.5	647.837	0.259135
0.54308	551.3	648.468	0.259387
0.54312	527.8	649.105	0.259642
0.54316	499.6	649.748	0.259899
0.5432	462.2	650.397	0.260159
0.54324	487	651.053	0.260421
0.54328	499.6	651.716	0.260686
0.54332	521.6	652.387	0.260955
0.54336	558.7	653.064	0.261226
0.5434	549.8	653.75	0.2615
0.54344	616.5	654.443	0.261777
0.54348	629.8	655.144	0.262058
0.54352	629.3	655.852	0.262341
0.54356	636.4	656.568	0.262627
0.5436	654.1	657.292	0.262917
0.54364	686	658.024	0.263209
0.54368	733.2	658.763	0.263505
0.54372	770.5	659.51	0.263804
0.54376	801.3	660.264	0.264106
0.5438	840.1	661.026	0.26441
0.54384	844.8	661.796	0.264718
0.54388	821.3	662.574	0.26503
0.54392	759.3	663.361	0.265344
0.54396	672.5	664.156	0.265662
0.544	588.3	664.96	0.265984
0.54404	509.7	665.773	0.266309
0.54408	411.7	666.596	0.266639
0.54412	364.3	667.429	0.266972
0.54416	339.1	668.273	0.267309
0.5442	330.2	669.126	0.26765
0.54424	370	669.989	0.267996
0.54428	379.3	670.862	0.268345
0.54432	450.6	671.745	0.268698
0.54436	496.5	672.637	0.269055
0.5444	539.3	673.537	0.269415
0.54444	599.3	674.446	0.269778
0.54448	643.1	675.361	0.270145
0.54452	680.5	676.284	0.270513
0.54456	728.2	677.212	0.270885
0.5446	754.4	678.146	0.271258
0.54464	833.6	679.084	0.271634
0.54468	864.4	680.026	0.27201
0.54472	925.6	680.971	0.272389
0.54476	940.2	681.92	0.272768
0.5448	937.5	682.87	0.273148
0.54484	924.2	683.823	0.273529
0.54488	861.7	684.778	0.273911
0.54492	835.4	685.735	0.274294
0.54496	779.2	686.693	0.274677
0.545	732.4	687.653	0.275061
0.54504	682.4	688.615	0.275446
0.54508	653	689.579	0.275832
0.54512	644.9	690.545	0.276218
0.54516	689.7	691.512	0.276605
0.5452	728.9	692.482	0.276993
0.54524	783.1	693.453	0.277381
0.54528	844.9	694.427	0.277771
0.54532	924.9	695.403	0.278161
0.54536	1002	696.381	0.278552
0.5454	1039	697.362	0.278945
0.54544	1045	698.346	0.279338
0.54548	1036	699.333	0.279733
0.54552	1004	700.324	0.28013
0.54556	959.3	701.32	0.280528
0.5456	884.2	702.322	0.280929
0.54564	768.6	703.331	0.281332
0.54568	649.3	704.347	0.281739
0.54572	540.9	705.372	0.282149
0.54576	443.6	706.407	0.282563
0.5458	349.4	707.453	0.282981
0.54584	257.6	708.51	0.283404
0.54588	201.9	709.58	0.283832
0.54592	155.7	710.663	0.284265
0.54596	129.2	711.759	0.284703
0.546	143.2	712.868	0.285147
0.54604	151.3	713.991	0.285597
0.54608	215.3	715.128	0.286051
0.54612	297.2	716.276	0.28651
0.54616	353.6	717.437	0.286975
0.5462	459.9	718.608	0.287443
0.54624	570.2	719.79	0.287916
0.54628	695.1	720.98	0.288392
0.54632	838.4	722.178	0.288871
0.54636	955.6	723.382	0.289353
0.5464	1072	724.592	0.289837
0.54644	1153	725.806	0.290322
0.54648	1188	727.023	0.290809
0.54652	1181	728.242	0.291297
0.54656	1147	729.464	0.291786
0.5466	1106	730.687	0.292275
0.54664	1040	731.911	0.292765
0.54668	974.1	733.137	0.293255
0.54672	915.9	734.364	0.293745
0.54676	857.9	735.592	0.294237
0.5468	780.2	736.821	0.294728
0.54684	734.7	738.052	0.295221
0.54688	696.9	739.285	0.295714
0.54692	668.9	740.521	0.296208
0.54696	651.1	741.759	0.296703
0.547	663	742.999	0.2972
0.54704	662	744.242	0.297697
0.54708	656.4	745.489	0.298196
0.54712	672.8	746.738	0.298695
0.54716	710.5	747.991	0.299196
0.5472	764.4	749.247	0.299699
0.54724	777.2	750.507	0.300203
0.54728	824.1	751.769	0.300708
0.54732	840.3	753.036	0.301214
0.54736	857.4	754.305	0.301722
0.5474	811.5	755.579	0.302231
0.54744	788.5	756.856	0.302742
0.54748	721.8	758.137	0.303255
0.54752	639.8	759.422	0.303769
0.54756	547.6	760.712	0.304285
0.5476	430.3	762.006	0.304802
0.54764	403.3	763.304	0.305322
0.54768	378.2	764.607	0.305843
0.54772	332.2	765.914	0.306366
0.54776	335.6	767.225	0.30689
0.5478	434.8	768.539	0.307415
0.54784	547.8	769.855	0.307942
0.54788	604.7	771.173	0.308469
0.54792	682	772.492	0.308997
0.54796	795.5	773.81	0.309524
0.548	906.7	775.127	0.310051
0.54804	953.6	776.442	0.310577
0.54808	1031	777.753	0.311101
0.54812	1075	779.06	0.311624
0.54816	1203	780.362	0.312145
0.5482	1219	781.658	0.312663
0.54824	1217	782.948	0.313179
0.54828	1232	784.231	0.313693
0.54832	1257	785.508	0.314203
0.54836	1184	786.777	0.314711
0.5484	1116	788.04	0.315216
0.54844	1051	789.297	0.315719
0.54848	1019	790.548	0.316219
0.54852	931	791.793	0.316717
0.54856	826.9	793.034	0.317214
0.5486	799.4	794.271	0.317709
0.54864	776.8	795.505	0.318202
0.54868	785	796.736	0.318694
0.54872	774.5	797.966	0.319186
0.54876	748.3	799.194	0.319678
0.5488	791.2	800.422	0.320169
0.54884	798.2	801.65	0.32066
0.54888	781.6	802.88	0.321152
0.54892	804.6	804.111	0.321644
0.54896	834.5	805.345	0.322138
0.549	846.9	806.582	0.322633
0.54904	815.6	807.822	0.323129
0.54908	766.1	809.068	0.323627
0.54912	726.2	810.318	0.324127
0.54916	670.7	811.574	0.32463
0.5492	628.9	812.837	0.325135
0.54924	629.8	814.107	0.325643
0.54928	555.7	815.385	0.326154
0.54932	523.4	816.671	0.326668
0.54936	469	817.965	0.327186
0.5494	452.2	819.268	0.327707
0.54944	437.2	820.58	0.328232
0.54948	474.4	821.901	0.32876
0.54952	486.9	823.23	0.329292
0.54956	495.6	824.567	0.329827
0.5496	510.8	825.913	0.330365
0.54964	519.7	827.265	0.330906
0.54968	606	828.624	0.331449
0.54972	683.5	829.988	0.331995
0.54976	777.4	831.357	0.332543
0.5498	892.4	832.73	0.333092
0.54984	1016	834.105	0.333642
0.54988	1099	835.482	0.334193
0.54992	1129	836.86	0.334744
0.54996	1179	838.238	0.335295
0.55	1208	839.615	0.335846
0.55004	1218	840.991	0.336396
0.55008	1188	842.365	0.336946
0.55012	1168	843.737	0.337495
0.55016	1108	845.107	0.338043
0.5502	1088	846.475	0.33859
0.55024	1054	847.841	0.339136
0.55028	990	849.205	0.339682
0.55032	986.6	850.568	0.340227
0.55036	906	851.929	0.340772
0.5504	870.4	853.289	0.341316
0.55044	814.9	854.649	0.34186
0.55048	770	856.009	0.342404
0.55052	754.7	857.369	0.342948
0.55056	738.4	858.73	0.343492
0.5506	734	860.092	0.344037
0.55064	724.4	861.455	0.344582
0.55068	728.7	862.82	0.345128
0.55072	733.5	864.187	0.345675
0.55076	762.6	865.555	0.346222
0.5508	823.1	866.925	0.34677
0.55084	851.5	868.298	0.347319
0.55088	878.9	869.672	0.347869
0.55092	886.1	871.048	0.348419
0.55096	863.1	872.426	0.34897
0.551	870.7	873.806	0.349522
0.55104	820.5	875.188	0.350075
0.55108	807.2	876.572	0.350629
0.55112	808.9	877.958	0.351183
0.55116	799.5	879.346	0.351739
0.5512	793.1	880.736	0.352294
0.55124	781.4	882.128	0.352851
0.55128	771	883.521	0.353408
0.55132	793.5	884.916	0.353966
0.55136	813.9	886.312	0.354525
0.5514	822.3	887.709	0.355083
0.55144	796.9	889.106	0.355643
0.55148	801	890.504	0.356202
0.55152	830.5	891.902	0.356761
0.55156	865.1	893.3	0.35732
0.5516	886.6	894.697	0.357879
0.55164	936.6	896.093	0.358437
0.55168	979.5	897.487	0.358995
0.55172	1000	898.879	0.359552
0.55176	1027	900.269	0.360108
0.5518	1075	901.656	0.360662
0.55184	1092	903.04	0.361216
0.55188	1116	904.421	0.361768
0.55192	1106	905.799	0.36232
0.55196	1103	907.173	0.362869
0.552	1082	908.544	0.363418
0.55204	1029	909.912	0.363965
0.55208	1006	911.277	0.364511
0.55212	941.1	912.638	0.365055
0.55216	914.3	913.997	0.365599
0.5522	871.2	915.354	0.366142
0.55224	845	916.709	0.366684
0.55228	803.8	918.062	0.367225
0.55232	785.8	919.413	0.367765
0.55236	793.9	920.763	0.368305
0.5524	752.2	922.111	0.368844
0.55244	761.3	923.458	0.369383
0.55248	724.8	924.804	0.369922
0.55252	750.8	926.149	0.370459
0.55256	767.3	927.492	0.370997
0.5526	759.8	928.833	0.371533
0.55264	783.2	930.173	0.372069
0.55268	823.3	931.51	0.372604
0.55272	824.9	932.844	0.373138
0.55276	843.1	934.175	0.37367
0.5528	894.1	935.503	0.374201
0.55284	904.8	936.827	0.374731
0.55288	927.7	938.146	0.375258
0.55292	946.5	939.459	0.375784
0.55296	935.2	940.767	0.376307
0.553	897.2	942.069	0.376828
0.55304	908.2	943.364	0.377346
0.55308	892.8	944.651	0.37786
0.55312	865.2	945.93	0.378372
0.55316	858	947.201	0.37888
0.5532	876.1	948.463	0.379385
0.55324	902	949.714	0.379886
0.55328	963	950.955	0.380382
0.55332	975.6	952.184	0.380874
0.55336	1029	953.401	0.381361
0.5534	1048	954.606	0.381842
0.55344	1095	955.797	0.382319
0.55348	1117	956.974	0.38279
0.55352	1115	958.136	0.383254
0.55356	1148	959.283	0.383713
0.5536	1147	960.415	0.384166
0.55364	1143	961.53	0.384612
0.55368	1143	962.629	0.385052
0.55372	1160	963.711	0.385485
0.55376	1173	964.777	0.385911
0.5538	1144	965.826	0.38633
0.55384	1135	966.858	0.386743
0.55388	1099	967.873	0.387149
0.55392	1108	968.871	0.387549
0.55396	1055	969.854	0.387941
0.554	1027	970.819	0.388328
0.55404	993.5	971.769	0.388708
0.55408	964.4	972.703	0.389081
0.55412	957.2	973.622	0.389449
0.55416	926.6	974.526	0.38981
0.5542	921.3	975.415	0.390166
0.55424	944.2	976.289	0.390516
0.55428	970.1	977.149	0.39086
0.55432	965.4	977.996	0.391198
0.55436	992.8	978.828	0.391531
0.5544	1033	979.647	0.391859
0.55444	1017	980.453	0.392181
0.55448	1026	981.245	0.392498
0.55452	1024	982.025	0.39281
0.55456	1027	982.792	0.393117
0.5546	1004	983.548	0.393419
0.55464	959.9	984.291	0.393717
0.55468	939.7	985.023	0.394009
0.55472	948.6	985.744	0.394298
0.55476	918.6	986.454	0.394582
0.5548	890.5	987.154	0.394861
0.55484	887.5	987.843	0.395137
0.55488	871.3	988.522	0.395409
0.55492	841.5	989.191	0.395676
0.55496	857.9	989.851	0.39594
0.555	855.5	990.5	0.3962
0.55504	853.7	991.141	0.396456
0.55508	890.1	991.771	0.396708
0.55512	933.9	992.392	0.396957
0.55516	964.2	993.003	0.397201
0.5552	1009	993.604	0.397442
0.55524	1068	994.195	0.397678
0.55528	1108	994.776	0.39791
0.55532	1173	995.346	0.398138
0.55536	1150	995.906	0.398362
0.5554	1175	996.455	0.398582
0.55544	1177	996.994	0.398798
0.55548	1153	997.523	0.399009
0.55552	1127	998.042	0.399217
0.55556	1082	998.551	0.39942
0.5556	1031	999.05	0.39962
0.55564	979.9	999.541	0.399816
0.55568	930.4	1000.02	0.400009
0.55572	904.8	1000.5	0.400198
0.55576	862.5	1000.96	0.400384
0.5558	845.1	1001.42	0.400567
0.55584	836.6	1001.87	0.400747
0.55588	825.4	1002.31	0.400924
0.55592	842.8	1002.74	0.401098
0.55596	857.2	1003.17	0.401269
0.556	885.7	1003.59	0.401437
0.55604	914	1004.01	0.401602
0.55608	941.1	1004.41	0.401764
0.55612	976	1004.81	0.401923
0.55616	1008	1005.2	0.402079
0.5562	1054	1005.58	0.402232
0.55624	1080	1005.95	0.402381
0.55628	1101	1006.32	0.402527
0.55632	1100	1006.67	0.402669
0.55636	1101	1007.02	0.402808
0.5564	1071	1007.36	0.402944
0.55644	1049	1007.69	0.403075
0.55648	979.6	1008.01	0.403204
0.55652	947.8	1008.32	0.403328
0.55656	919.8	1008.62	0.40345
0.5566	869.1	1008.92	0.403567
0.55664	851.5	1009.2	0.403681
0.55668	826.2	1009.48	0.403791
0.55672	814.2	1009.74	0.403898
0.55676	819.7	1010	0.404
0.5568	845.9	1010.25	0.404099
0.55684	889.3	1010.48	0.404193
0.55688	933.5	1010.71	0.404283
0.55692	989.3	1010.92	0.404369
0.55696	1045	1011.12	0.404449
0.557	1084	1011.31	0.404525
0.55704	1118	1011.49	0.404595
0.55708	1153	1011.65	0.40466
0.55712	1170	1011.8	0.404719
0.55716	1202	1011.93	0.404773
0.5572	1218	1012.05	0.40482
0.55724	1231	1012.15	0.404862
0.55728	1239	1012.24	0.404897
0.55732	1242	1012.31	0.404926
0.55736	1186	1012.37	0.404949
0.5574	1158	1012.41	0.404965
0.55744	1113	1012.44	0.404975
0.55748	1047	1012.45	0.40498
0.55752	984.5	1012.44	0.404978
0.55756	939.9	1012.43	0.40497
0.5576	879.6	1012.39	0.404957
0.55764	825.4	1012.34	0.404938
0.55768	826.7	1012.28	0.404913
0.55772	834.3	1012.21	0.404882
0.55776	877.8	1012.11	0.404846
0.5578	841.5	1012.01	0.404804
0.55784	877.7	1011.89	0.404756
0.55788	936.1	1011.76	0.404702
0.55792	1012	1011.61	0.404643
0.55796	1008	1011.44	0.404577
0.558	997.7	1011.26	0.404506
0.55804	1044	1011.07	0.404428
0.55808	1102	1010.86	0.404344
0.55812	1121	1010.63	0.404253
0.55816	1125	1010.39	0.404155
0.5582	1080	1010.13	0.404051
0.55824	1129	1009.85	0.403941
0.55828	1125	1009.56	0.403823
0.55832	1103	1009.25	0.403699
0.55836	1032	1008.92	0.403568
0.5584	1039	1008.58	0.40343
0.55844	1027	1008.21	0.403286
0.55848	981	1007.84	0.403135
0.55852	913.8	1007.44	0.402977
0.55856	864.1	1007.03	0.402812
0.5586	884.3	1006.6	0.40264
0.55864	897.2	1006.15	0.402462
0.55868	894.8	1005.69	0.402277
0.55872	874.9	1005.21	0.402085
0.55876	915.4	1004.71	0.401886
0.5588	946.8	1004.2	0.40168
0.55884	978.4	1003.67	0.401466
0.55888	1008	1003.11	0.401246
0.55892	1056	1002.54	0.401018
0.55896	1076	1001.96	0.400782
0.559	1107	1001.35	0.400539
0.55904	1115	1000.72	0.400288
0.55908	1128	1000.07	0.400029
0.55912	1147	999.407	0.399763
0.55916	1130	998.72	0.399488
0.5592	1149	998.013	0.399205
0.55924	1118	997.286	0.398915
0.55928	1130	996.539	0.398616
0.55932	1119	995.773	0.398309
0.55936	1086	994.986	0.397994
0.5594	1086	994.18	0.397672
0.55944	1049	993.354	0.397342
0.55948	1007	992.51	0.397004
0.55952	957.3	991.646	0.396659
0.55956	941.6	990.764	0.396306
0.5596	921.3	989.864	0.395946
0.55964	898	988.946	0.395578
0.55968	897.3	988.01	0.395204
0.55972	896.1	987.056	0.394822
0.55976	923.6	986.085	0.394434
0.5598	956.2	985.097	0.394039
0.55984	936.8	984.091	0.393636
0.55988	954.9	983.068	0.393227
0.55992	960.4	982.029	0.392811
0.55996	1008	980.972	0.392389
0.56	1032	979.898	0.391959
0.56004	995.6	978.808	0.391523
0.56008	1001	977.701	0.39108
0.56012	1006	976.577	0.390631
0.56016	1002	975.436	0.390175
0.5602	990.5	974.279	0.389712
0.56024	993.5	973.106	0.389242
0.56028	1013	971.916	0.388766
0.56032	998.1	970.71	0.388284
0.56036	1018	969.489	0.387796
0.5604	1003	968.251	0.387301
0.56044	1004	966.998	0.386799
0.56048	1020	965.73	0.386292
0.56052	1016	964.446	0.385778
0.56056	1015	963.147	0.385259
0.5606	1007	961.833	0.384733
0.56064	1011	960.505	0.384202
0.56068	1031	959.163	0.383665
0.56072	1035	957.807	0.383123
0.56076	1022	956.438	0.382575
0.5608	1050	955.055	0.382022
0.56084	1007	953.659	0.381464
0.56088	1035	952.252	0.380901
0.56092	993.8	950.832	0.380333
0.56096	969.9	949.401	0.37976
0.561	950.6	947.959	0.379183
0.56104	886.5	946.506	0.378602
