# Supplementary material for: Shear Thickening Fluids in Cork Agglomerates: An Exploration of Advantages and Drawbacks
Source: Preprints.org preprint supplement (doi:10.20944/preprints202304.0004.v1), 2023-04-03
Supplement: Supplementary file 7 [file Amostra 30-report 2.pdf › Supplementary Material/SEM Images/30� STF/Amostra 30-report 2.pdf]

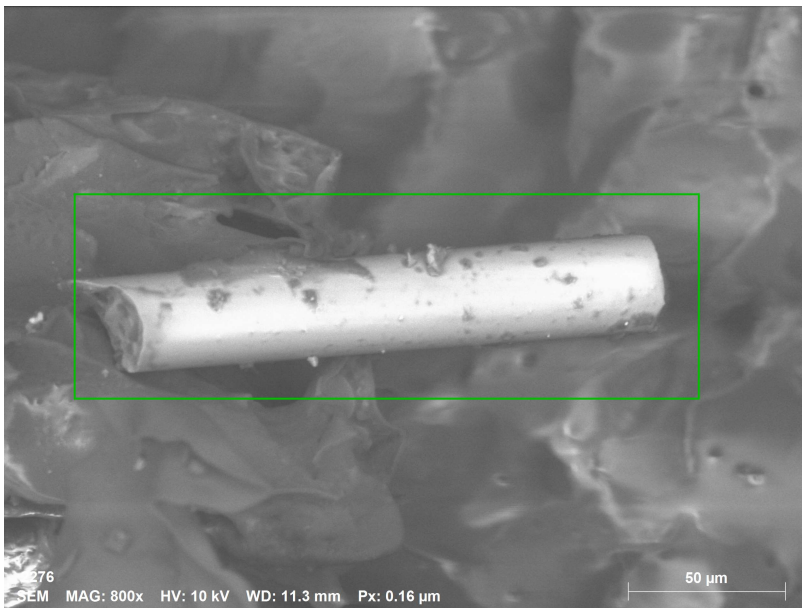

| Name | Date       | Time     | HV<br>[kV] | Mag  | WD<br>[mm] |
|------|------------|----------|------------|------|------------|
| 2276 | 20/07/2022 | 15:59:46 | 10.0 keV   | 800x | 11.3 mm    |

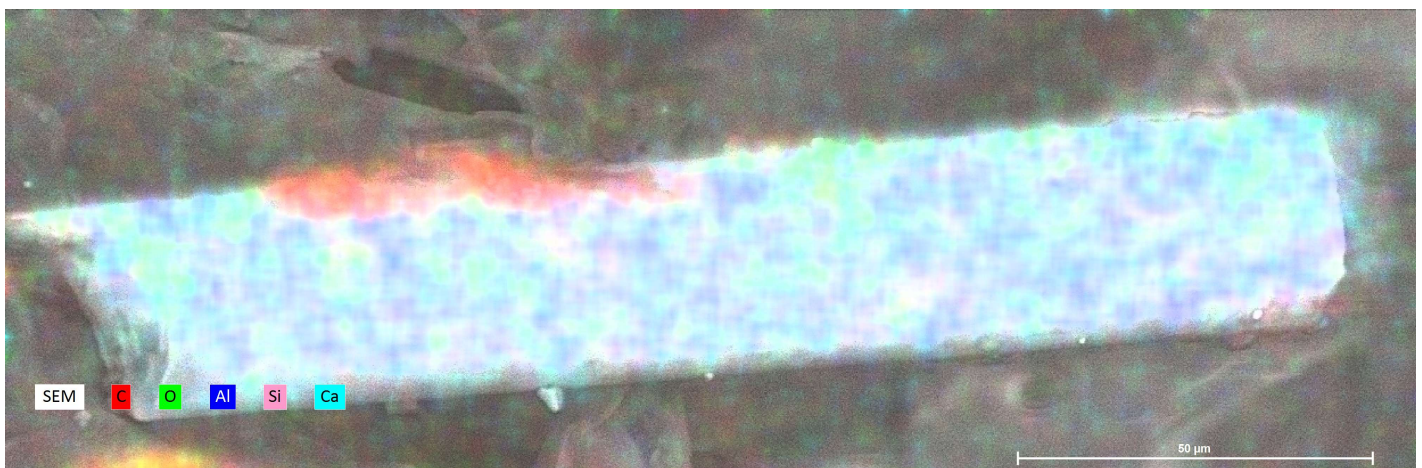

| Name | Date       | Time     | HV<br>[kV] | Mag  | WD<br>[mm] |
|------|------------|----------|------------|------|------------|
| 2276 | 20/07/2022 | 16:00:30 | 10.0 keV   | 800x | 11.3 mm    |

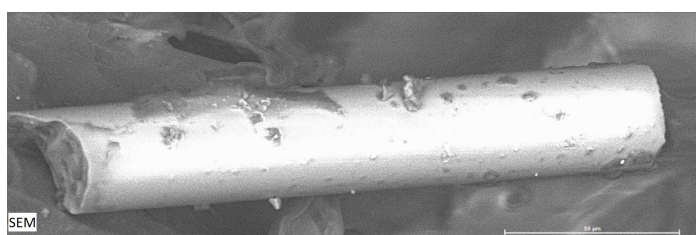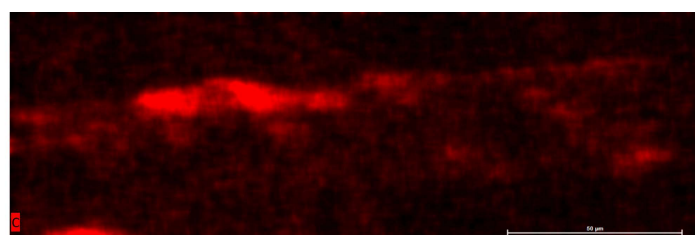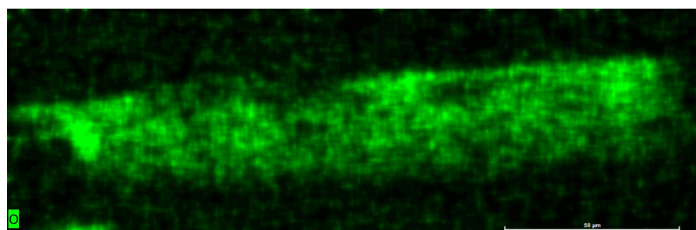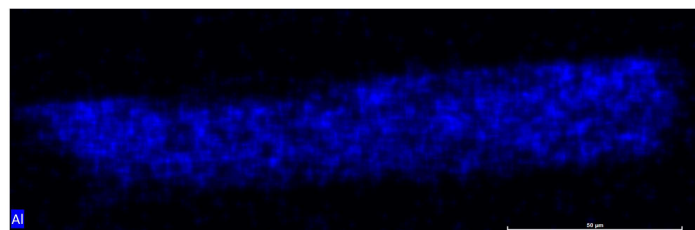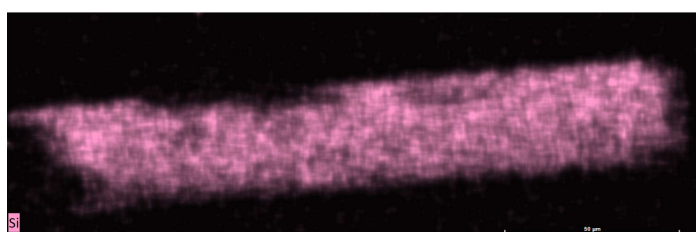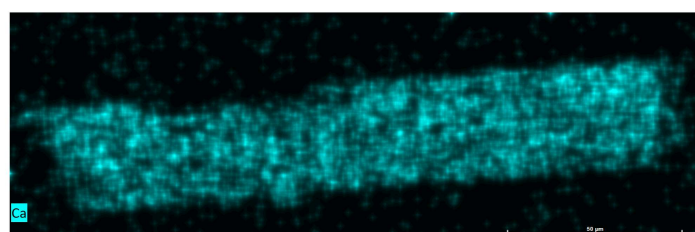

# Application Note

Company / Department

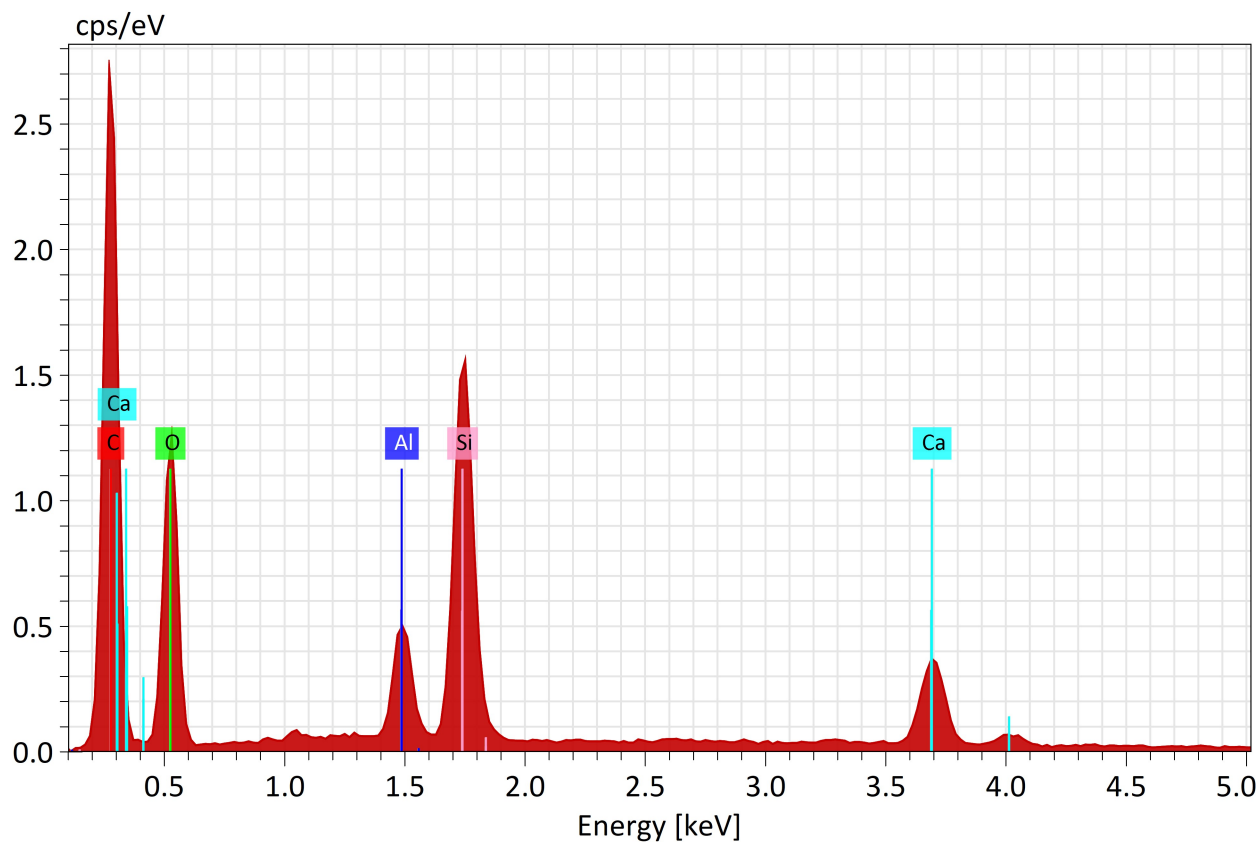

Map

| Element | At. No. | Netto      | Mass [%]      | Mass Norm. [%] | Atom [%]      | abs. error [%]<br>(1 sigma) | rel. error [%]<br>(1 sigma) |
|---------|---------|------------|---------------|----------------|---------------|-----------------------------|-----------------------------|
| C       | 6       | 18811      | 70.91         | 56.25          | 68.29         | 3.25                        | 4.59                        |
| O       | 8       | 9149       | 31.30         | 24.83          | 22.63         | 1.50                        | 4.80                        |
| Si      | 14      | 14973      | 14.37         | 11.40          | 5.92          | 0.75                        | 5.23                        |
| Ca      | 20      | 4618       | 6.40          | 5.08           | 1.85          | 0.34                        | 5.39                        |
| Al      | 13      | 4151       | 3.07          | 2.44           | 1.32          | 0.18                        | 5.86                        |
|         |         | <b>Sum</b> | <b>126.05</b> | <b>100.00</b>  | <b>100.00</b> |                             |                             |
