# Supplementary material for: Shear Thickening Fluids in Cork Agglomerates: An Exploration of Advantages and Drawbacks
Source: Preprints.org preprint supplement (doi:10.20944/preprints202304.0004.v1), 2023-04-03
Supplement: Supplementary file 7 [file EN_x_10.xlsx]

## Sheet: data
Time - Voltage - Voltage	Amplitude - Voltage - Voltage
0	562.4
4e-05	559
8e-05	562.9
0.00012	559.9
0.00016	562.6
0.0002	560.8
0.00024	562.4
0.00028	561.4
0.00032	561.6
0.00036	562.2
0.0004	560.4
0.00044	563.3
0.00048	559
0.00052	564.3
0.00056	557.4
0.0006	564.5
0.00064	556.2
0.00068	564.2
0.00072	556
0.00076	563.5
0.0008	555.7
0.00084	563
0.00088	556.5
0.00092	562.2
0.00096	557.5
0.001	561.9
0.00104	558
0.00108	562.1
0.00112	558.7
0.00116	562.6
0.0012	559.1
0.00124	562.8
0.00128	559.6
0.00132	562.8
0.00136	560.6
0.0014	562.4
0.00144	561.6
0.00148	561.2
0.00152	562.8
0.00156	559.7
0.0016	563.6
0.00164	558.5
0.00168	564.1
0.00172	557.2
0.00176	564.2
0.0018	556.3
0.00184	564.1
0.00188	555.8
0.00192	563.4
0.00196	555.4
0.002	563
0.00204	556.6
0.00208	562
0.00212	557.3
0.00216	561.8
0.0022	558.5
0.00224	562.6
0.00228	558.8
0.00232	562.2
0.00236	559.7
0.0024	563.2
0.00244	560.9
0.00248	562.8
0.00252	560.7
0.00256	562.1
0.0026	561.4
0.00264	561.4
0.00268	563.3
0.00272	558.9
0.00276	564.1
0.0028	557.5
0.00284	564.4
0.00288	556.8
0.00292	564.2
0.00296	555.8
0.003	563.3
0.00304	555.2
0.00308	563
0.00312	556.4
0.00316	562.6
0.0032	556.2
0.00324	562.2
0.00328	558
0.00332	561.9
0.00336	558.7
0.0034	562.1
0.00344	559.2
0.00348	562.9
0.00352	559.9
0.00356	563
0.0036	560.6
0.00364	562.6
0.00368	561.2
0.00372	561.9
0.00376	562.6
0.0038	560.6
0.00384	563.6
0.00388	558.9
0.00392	564.2
0.00396	557.6
0.004	564.3
0.00404	556.2
0.00408	564.2
0.00412	555.8
0.00416	563.8
0.0042	556
0.00424	562.4
0.00428	556.6
0.00432	562.1
0.00436	557.4
0.0044	562
0.00444	558
0.00448	562.1
0.00452	558.8
0.00456	562.6
0.0046	559.5
0.00464	563
0.00468	560
0.00472	562.9
0.00476	560.6
0.0048	562
0.00484	561.9
0.00488	561
0.00492	562.7
0.00496	559.6
0.005	564
0.00504	558.4
0.00508	564.4
0.00512	557
0.00516	564.3
0.0052	556.1
0.00524	564
0.00528	556
0.00532	563.3
0.00536	556
0.0054	562.8
0.00544	556.9
0.00548	562.3
0.00552	557.6
0.00556	561.9
0.0056	558.3
0.00564	561.7
0.00568	559
0.00572	563
0.00576	559.9
0.0058	563
0.00584	560
0.00588	563
0.00592	560.9
0.00596	561.6
0.006	561.8
0.00604	561.4
0.00608	563.2
0.00612	559.2
0.00616	564
0.0062	558
0.00624	564.3
0.00628	556.8
0.00632	564.3
0.00636	556.1
0.0064	564.1
0.00644	556
0.00648	563.2
0.00652	557
0.00656	562.4
0.0066	557
0.00664	562.2
0.00668	557.8
0.00672	562.2
0.00676	558
0.0068	562.2
0.00684	559.4
0.00688	562.3
0.00692	559.4
0.00696	562.9
0.007	560.2
0.00704	562.3
0.00708	561.3
0.00712	562.3
0.00716	561.9
0.0072	560.5
0.00724	563.2
0.00728	558.9
0.00732	564
0.00736	557.5
0.0074	564.2
0.00744	556.4
0.00748	564.3
0.00752	555.4
0.00756	563.9
0.0076	556.2
0.00764	562.8
0.00768	556.4
0.00772	562.2
0.00776	557.7
0.0078	562.1
0.00784	557.5
0.00788	562
0.00792	558.6
0.00796	562.4
0.008	559.1
0.00804	562.9
0.00808	559.3
0.00812	562.9
0.00816	560.3
0.0082	562.4
0.00824	561.3
0.00828	561.4
0.00832	562.3
0.00836	560.5
0.0084	563.3
0.00844	558.7
0.00848	564.3
0.00852	557.4
0.00856	564.5
0.0086	556.3
0.00864	563.5
0.00868	555.5
0.00872	563.4
0.00876	555.6
0.0088	563.2
0.00884	556.3
0.00888	562.2
0.00892	557
0.00896	561.8
0.009	557.8
0.00904	561.9
0.00908	559.1
0.00912	562
0.00916	558.9
0.0092	562.7
0.00924	559.9
0.00928	563.8
0.00932	560.3
0.00936	562.4
0.0094	561.7
0.00944	561.2
0.00948	562.8
0.00952	559.9
0.00956	563.7
0.0096	558.2
0.00964	564.3
0.00968	557.4
0.00972	564.3
0.00976	556.2
0.0098	563.7
0.00984	555.6
0.00988	563.5
0.00992	555.7
0.00996	562.3
0.01	556.3
0.01004	561.8
0.01008	557.2
0.01012	562.2
0.01016	558.2
0.0102	562.2
0.01024	558.7
0.01028	562.4
0.01032	559.8
0.01036	562.5
0.0104	559.7
0.01044	562.6
0.01048	560.5
0.01052	562.8
0.01056	561.2
0.0106	561.1
0.01064	563
0.01068	559.3
0.01072	564.1
0.01076	558
0.0108	564.5
0.01084	556.6
0.01088	564.4
0.01092	555.6
0.01096	563.9
0.011	555.9
0.01104	562.9
0.01108	555.8
0.01112	562
0.01116	556.9
0.0112	562
0.01124	557.6
0.01128	561.7
0.01132	558.6
0.01136	562.3
0.0114	558.8
0.01144	562.8
0.01148	559.4
0.01152	562.7
0.01156	560.3
0.0116	562.7
0.01164	560.9
0.01168	561.6
0.01172	562
0.01176	560.4
0.0118	563.2
0.01184	559.2
0.01188	563.8
0.01192	557.8
0.01196	564.4
0.012	556.1
0.01204	564.4
0.01208	555.7
0.01212	563.1
0.01216	555.7
0.0122	562.8
0.01224	556.4
0.01228	562.4
0.01232	556.6
0.01236	561.9
0.0124	558
0.01244	562.2
0.01248	558.6
0.01252	561.7
0.01256	559
0.0126	562.3
0.01264	559.3
0.01268	563.3
0.01272	559.5
0.01276	562.4
0.0128	560.9
0.01284	561
0.01288	562.7
0.01292	560.4
0.01296	563.3
0.013	558
0.01304	564
0.01308	557.3
0.01312	564.2
0.01316	556.1
0.0132	563.8
0.01324	555.6
0.01328	563.3
0.01332	555.4
0.01336	562.8
0.0134	556.2
0.01344	562
0.01348	557.2
0.01352	561.8
0.01356	558
0.0136	561.7
0.01364	558.9
0.01368	562.1
0.01372	559.2
0.01376	562.5
0.0138	559.5
0.01384	562.5
0.01388	560.3
0.01392	562.4
0.01396	561.7
0.014	561.1
0.01404	562.4
0.01408	559.8
0.01412	563.8
0.01416	557.9
0.0142	564.1
0.01424	556.5
0.01428	564.3
0.01432	555.7
0.01436	563.8
0.0144	555.5
0.01444	563.1
0.01448	555.9
0.01452	562.4
0.01456	556.3
0.0146	562.4
0.01464	557.3
0.01468	561.8
0.01472	557.9
0.01476	561.9
0.0148	558.9
0.01484	562.4
0.01488	559.3
0.01492	562.6
0.01496	559.7
0.015	562.6
0.01504	560.7
0.01508	562.1
0.01512	561.7
0.01516	561
0.0152	562.5
0.01524	559.4
0.01528	563.4
0.01532	558.1
0.01536	564.1
0.0154	556.6
0.01544	564.5
0.01548	555.4
0.01552	563.9
0.01556	555.6
0.0156	562.9
0.01564	555.6
0.01568	562.4
0.01572	556.8
0.01576	561.4
0.0158	557.8
0.01584	562
0.01588	557.9
0.01592	562.1
0.01596	558.8
0.016	562.2
0.01604	559.5
0.01608	562.4
0.01612	559.9
0.01616	562.6
0.0162	560.4
0.01624	562.2
0.01628	561.6
0.01632	560.9
0.01636	562.5
0.0164	559.2
0.01644	564.2
0.01648	557.7
0.01652	564.5
0.01656	556.8
0.0166	563.9
0.01664	556
0.01668	563.8
0.01672	555.8
0.01676	563.1
0.0168	555.9
0.01684	562.2
0.01688	556.9
0.01692	562.2
0.01696	557
0.017	561.4
0.01704	558.4
0.01708	562.2
0.01712	558.9
0.01716	562.8
0.0172	559.4
0.01724	562.6
0.01728	560.2
0.01732	562.6
0.01736	560.6
0.0174	561.9
0.01744	562.1
0.01748	560.8
0.01752	563.2
0.01756	558.8
0.0176	564.2
0.01764	557.5
0.01768	564.5
0.01772	556.3
0.01776	563.9
0.0178	555.7
0.01784	563.7
0.01788	555.8
0.01792	562.9
0.01796	556.2
0.018	562.4
0.01804	556.8
0.01808	562.2
0.01812	557.6
0.01816	561.9
0.0182	558.7
0.01824	562.4
0.01828	559.2
0.01832	562.5
0.01836	559.7
0.0184	562.9
0.01844	560.4
0.01848	562.4
0.01852	561.2
0.01856	561.3
0.0186	562.5
0.01864	560.4
0.01868	563.2
0.01872	558.4
0.01876	564.5
0.0188	556.9
0.01884	564.2
0.01888	556.1
0.01892	563.7
0.01896	555.9
0.019	564
0.01904	555.8
0.01908	562.8
0.01912	556
0.01916	562.1
0.0192	557.2
0.01924	561.8
0.01928	558.3
0.01932	561.8
0.01936	558.5
0.0194	562.2
0.01944	559.9
0.01948	562.6
0.01952	559.8
0.01956	562.4
0.0196	560.5
0.01964	562
0.01968	561.8
0.01972	560.8
0.01976	562.5
0.0198	559.7
0.01984	563.7
0.01988	558
0.01992	564.2
0.01996	556.9
0.02	564.1
0.02004	555.9
0.02008	564.1
0.02012	555.8
0.02016	563.4
0.0202	555.9
0.02024	562.5
0.02028	556.8
0.02032	562.5
0.02036	557.8
0.0204	561.9
0.02044	558.4
0.02048	562.3
0.02052	559.4
0.02056	562.7
0.0206	559.6
0.02064	563.1
0.02068	560.2
0.02072	562.8
0.02076	561
0.0208	561.9
0.02084	562.2
0.02088	560.2
0.02092	563.3
0.02096	559
0.021	564.2
0.02104	557.3
0.02108	564.2
0.02112	556.2
0.02116	564.2
0.0212	555.9
0.02124	563.6
0.02128	556
0.02132	562.9
0.02136	556.3
0.0214	562.1
0.02144	557.3
0.02148	562.5
0.02152	557.9
0.02156	562.1
0.0216	558.8
0.02164	562.3
0.02168	559.3
0.02172	562.7
0.02176	560.1
0.0218	562.6
0.02184	560.6
0.02188	562.3
0.02192	561.4
0.02196	561.7
0.022	562.6
0.02204	560.3
0.02208	563.4
0.02212	558.3
0.02216	564.1
0.0222	557
0.02224	564.2
0.02228	556
0.02232	563.3
0.02236	555.6
0.0224	563.5
0.02244	556.2
0.02248	562.8
0.02252	556.2
0.02256	562.3
0.0226	557.4
0.02264	561.5
0.02268	558.3
0.02272	562.3
0.02276	558.5
0.0228	562.6
0.02284	559.2
0.02288	563.1
0.02292	560.7
0.02296	562.8
0.023	561.3
0.02304	562.5
0.02308	562
0.02312	560.9
0.02316	563.1
0.0232	560.1
0.02324	563.5
0.02328	558.3
0.02332	564.4
0.02336	557.2
0.0234	564.4
0.02344	555.9
0.02348	564.3
0.02352	555.9
0.02356	563.2
0.0236	555.9
0.02364	563
0.02368	556.8
0.02372	561.8
0.02376	557.5
0.0238	562.3
0.02384	558.4
0.02388	562.2
0.02392	559.1
0.02396	562.5
0.024	559.6
0.02404	562.8
0.02408	560.2
0.02412	562.9
0.02416	560.6
0.0242	562.3
0.02424	561.7
0.02428	561.1
0.02432	563.4
0.02436	559.6
0.0244	564.1
0.02444	558
0.02448	564.4
0.02452	556.9
0.02456	564.4
0.0246	556.3
0.02464	563.8
0.02468	555.9
0.02472	563
0.02476	555.9
0.0248	562.9
0.02484	556.9
0.02488	562.3
0.02492	557.4
0.02496	562
0.025	558.6
0.02504	562.4
0.02508	559.1
0.02512	562.6
0.02516	559.7
0.0252	562.6
0.02524	560.2
0.02528	562.9
0.02532	561
0.02536	561.9
0.0254	561.8
0.02544	561.1
0.02548	563.4
0.02552	559.5
0.02556	564
0.0256	558
0.02564	564.3
0.02568	556.8
0.02572	564
0.02576	555.9
0.0258	563.8
0.02584	555.9
0.02588	563.1
0.02592	556.4
0.02596	562.3
0.026	557
0.02604	562.3
0.02608	557.8
0.02612	561.9
0.02616	558.3
0.0262	562.6
0.02624	559.1
0.02628	562.8
0.02632	559.9
0.02636	562.7
0.0264	560.5
0.02644	562.4
0.02648	561
0.02652	561.7
0.02656	562
0.0266	559.8
0.02664	563.3
0.02668	559.5
0.02672	564
0.02676	557.5
0.0268	563.8
0.02684	556.6
0.02688	564.1
0.02692	555.6
0.02696	563.7
0.027	555.5
0.02704	563.2
0.02708	556.2
0.02712	562.1
0.02716	557.9
0.0272	561.9
0.02724	558
0.02728	562
0.02732	558.7
0.02736	562.6
0.0274	559.2
0.02744	562.7
0.02748	559.7
0.02752	562.8
0.02756	560.9
0.0276	562.1
0.02764	561.4
0.02768	561.3
0.02772	562.7
0.02776	560.4
0.0278	563.5
0.02784	558.5
0.02788	564.3
0.02792	557.1
0.02796	564.4
0.028	556.1
0.02804	563.7
0.02808	555.9
0.02812	562.7
0.02816	556.1
0.0282	562.8
0.02824	556.3
0.02828	562.4
0.02832	557.6
0.02836	561.7
0.0284	558.4
0.02844	561.8
0.02848	558.7
0.02852	562.2
0.02856	559.1
0.0286	563.2
0.02864	560.3
0.02868	562.5
0.02872	560.6
0.02876	562.3
0.0288	561.8
0.02884	561.4
0.02888	562.9
0.02892	559.6
0.02896	563.6
0.029	558.3
0.02904	564.2
0.02908	557.3
0.02912	564.3
0.02916	555.1
0.0292	564.1
0.02924	555.8
0.02928	563.3
0.02932	556
0.02936	562.7
0.0294	556.6
0.02944	562.8
0.02948	557.2
0.02952	561.4
0.02956	557.9
0.0296	562.3
0.02964	558.7
0.02968	562.6
0.02972	559.7
0.02976	562.6
0.0298	559.9
0.02984	562.8
0.02988	561
0.02992	562.5
0.02996	561.9
0.03	561
0.03004	563
0.03008	559.1
0.03012	563.8
0.03016	557.7
0.0302	564.3
0.03024	556.4
0.03028	563.9
0.03032	555.9
0.03036	563.8
0.0304	555.5
0.03044	562.8
0.03048	556.1
0.03052	562.5
0.03056	557.1
0.0306	562
0.03064	557.3
0.03068	561.8
0.03072	558.9
0.03076	561.9
0.0308	559
0.03084	562.6
0.03088	559.7
0.03092	562.9
0.03096	560.1
0.031	562.3
0.03104	561.2
0.03108	561.6
0.03112	562.2
0.03116	560.2
0.0312	563.1
0.03124	558.8
0.03128	564.1
0.03132	557.3
0.03136	564.2
0.0314	556.2
0.03144	563.9
0.03148	555.7
0.03152	563.4
0.03156	555.9
0.0316	562.9
0.03164	556
0.03168	561.9
0.03172	557.2
0.03176	561.9
0.0318	558
0.03184	562
0.03188	558.5
0.03192	562.3
0.03196	559.2
0.032	562.7
0.03204	559.8
0.03208	563
0.03212	560.3
0.03216	562.1
0.0322	561.3
0.03224	561.2
0.03228	562
0.03232	559.5
0.03236	563.8
0.0324	558.1
0.03244	564.2
0.03248	557.7
0.03252	564.3
0.03256	556
0.0326	563.9
0.03264	555.7
0.03268	563.5
0.03272	555.8
0.03276	562.4
0.0328	556.6
0.03284	562
0.03288	557.3
0.03292	561.6
0.03296	558.2
0.033	562.3
0.03304	558.7
0.03308	563.1
0.03312	559.2
0.03316	562.4
0.0332	560.4
0.03324	562.6
0.03328	560.7
0.03332	562
0.03336	561.3
0.0334	561.1
0.03344	562.8
0.03348	559.3
0.03352	563.6
0.03356	558
0.0336	564.3
0.03364	556
0.03368	564.2
0.03372	556
0.03376	563.8
0.0338	555.5
0.03384	562.8
0.03388	556
0.03392	562.3
0.03396	556.6
0.034	561.9
0.03404	557.3
0.03408	561.6
0.03412	558.4
0.03416	562.2
0.0342	558.8
0.03424	562.5
0.03428	559.3
0.03432	562.7
0.03436	560
0.0344	562.6
0.03444	560.8
0.03448	561.7
0.03452	561.6
0.03456	560.2
0.0346	563.5
0.03464	558.9
0.03468	563.8
0.03472	557.4
0.03476	564.2
0.0348	556.7
0.03484	563.9
0.03488	555.5
0.03492	563.3
0.03496	555.8
0.035	563.1
0.03504	556.1
0.03508	561.8
0.03512	556.9
0.03516	561.7
0.0352	557.7
0.03524	561.9
0.03528	558.7
0.03532	561.8
0.03536	559
0.0354	562.2
0.03544	559.7
0.03548	562.8
0.03552	560.1
0.03556	562.3
0.0356	560.9
0.03564	561.8
0.03568	562
0.03572	560.4
0.03576	563.3
0.0358	558.4
0.03584	564.4
0.03588	557.2
0.03592	564.2
0.03596	556
0.036	563.6
0.03604	555.9
0.03608	563.1
0.03612	555.5
0.03616	562.4
0.0362	556.2
0.03624	562.4
0.03628	557.4
0.03632	562.3
0.03636	557.5
0.0364	561.5
0.03644	558.7
0.03648	562.2
0.03652	559.2
0.03656	562.5
0.0366	559.5
0.03664	562.9
0.03668	560.7
0.03672	562.3
0.03676	561.7
0.0368	561.5
0.03684	562.6
0.03688	560.1
0.03692	563.5
0.03696	558
0.037	564.2
0.03704	556.9
0.03708	564.3
0.03712	555.8
0.03716	564.2
0.0372	555.5
0.03724	562.8
0.03728	556.1
0.03732	562.2
0.03736	556.6
0.0374	562.2
0.03744	557.3
0.03748	562.2
0.03752	558.2
0.03756	562
0.0376	558.8
0.03764	562.3
0.03768	559.3
0.03772	563
0.03776	559.9
0.0378	562.7
0.03784	560.8
0.03788	562
0.03792	561.8
0.03796	560.8
0.038	563.1
0.03804	559.3
0.03808	563.7
0.03812	557.9
0.03816	564.5
0.0382	556.4
0.03824	564.5
0.03828	556
0.03832	563.7
0.03836	555.5
0.0384	563.2
0.03844	555.9
0.03848	562.2
0.03852	556.8
0.03856	562.2
0.0386	557.9
0.03864	561.7
0.03868	558.3
0.03872	561.9
0.03876	559
0.0388	562.9
0.03884	559.7
0.03888	562.4
0.03892	560.2
0.03896	562.6
0.039	560.9
0.03904	561.9
0.03908	562.6
0.03912	560.3
0.03916	562.5
0.0392	558.9
0.03924	564.2
0.03928	557.5
0.03932	563.6
0.03936	556.3
0.0394	563.9
0.03944	555.6
0.03948	563.6
0.03952	556.2
0.03956	563
0.0396	556.2
0.03964	562.1
0.03968	557.1
0.03972	562.4
0.03976	557.8
0.0398	561.5
0.03984	559.4
0.03988	561.7
0.03992	559.4
0.03996	562.6
0.04	560
0.04004	562.8
0.04008	560.9
0.04012	562.6
0.04016	561.7
0.0402	561.2
0.04024	562.5
0.04028	559.9
0.04032	563.7
0.04036	558.2
0.0404	564.3
0.04044	557
0.04048	564.2
0.04052	556
0.04056	564
0.0406	555.8
0.04064	563.4
0.04068	556.1
0.04072	562.7
0.04076	557.3
0.0408	561.8
0.04084	557.7
0.04088	562.1
0.04092	558.3
0.04096	562.6
0.041	558.8
0.04104	562.8
0.04108	559.5
0.04112	563
0.04116	560.3
0.0412	562.9
0.04124	560.9
0.04128	562.1
0.04132	562
0.04136	560.8
0.0414	562.9
0.04144	559.3
0.04148	563.8
0.04152	557.9
0.04156	564.3
0.0416	556.4
0.04164	564.3
0.04168	555.8
0.04172	563.4
0.04176	555.7
0.0418	563.1
0.04184	556.1
0.04188	562.3
0.04192	556.9
0.04196	562
0.042	557.9
0.04204	562
0.04208	558.7
0.04212	561.9
0.04216	559.4
0.0422	563
0.04224	559.9
0.04228	563.3
0.04232	560.4
0.04236	562.3
0.0424	561.8
0.04244	561.3
0.04248	563.1
0.04252	559.7
0.04256	564.1
0.0426	558.9
0.04264	564.3
0.04268	556.6
0.04272	564.3
0.04276	556
0.0428	563.1
0.04284	556.2
0.04288	563.8
0.04292	555.9
0.04296	562.3
0.043	556.7
0.04304	562.4
0.04308	557.8
0.04312	561.9
0.04316	558.1
0.0432	562.5
0.04324	559.3
0.04328	562.8
0.04332	560
0.04336	562.6
0.0434	560
0.04344	562.4
0.04348	561
0.04352	562.5
0.04356	561.9
0.0436	560.7
0.04364	563
0.04368	559.5
0.04372	564.2
0.04376	557.8
0.0438	564.5
0.04384	556.5
0.04388	564.2
0.04392	555.9
0.04396	563.6
0.044	556.2
0.04404	563
0.04408	556.3
0.04412	562.4
0.04416	557.2
0.0442	562.1
0.04424	558
0.04428	562.3
0.04432	558.6
0.04436	562.5
0.0444	559.3
0.04444	562.9
0.04448	559.8
0.04452	562.7
0.04456	560.6
0.0446	562.6
0.04464	561.5
0.04468	561.8
0.04472	562.6
0.04476	560.1
0.0448	563.5
0.04484	558.8
0.04488	564
0.04492	557.5
0.04496	564.5
0.045	556.3
0.04504	563.9
0.04508	555.7
0.04512	563.5
0.04516	555.9
0.0452	562.9
0.04524	556.3
0.04528	562.1
0.04532	557.7
0.04536	562
0.0454	558.6
0.04544	562.1
0.04548	558.9
0.04552	562.6
0.04556	559.1
0.0456	563.1
0.04564	560.2
0.04568	562.9
0.04572	560.5
0.04576	562.4
0.0458	562
0.04584	561.4
0.04588	563
0.04592	559.7
0.04596	564.1
0.046	558.1
0.04604	563.9
0.04608	556.7
0.04612	563.9
0.04616	555.5
0.0462	563.7
0.04624	556.2
0.04628	563.3
0.04632	556.3
0.04636	562.8
0.0464	556.5
0.04644	562.1
0.04648	558.3
0.04652	561.8
0.04656	558.5
0.0466	561.8
0.04664	558.7
0.04668	563
0.04672	559.6
0.04676	563
0.0468	559.9
0.04684	562.7
0.04688	561.3
0.04692	561.9
0.04696	562.1
0.047	561
0.04704	563.2
0.04708	558.9
0.04712	564.2
0.04716	557.6
0.0472	564.6
0.04724	556.2
0.04728	564.6
0.04732	555.5
0.04736	563.5
0.0474	555.9
0.04744	562.8
0.04748	556.7
0.04752	562.3
0.04756	557
0.0476	561.5
0.04764	558
0.04768	562.2
0.04772	558.8
0.04776	562.3
0.0478	559.2
0.04784	562.8
0.04788	559.6
0.04792	563.2
0.04796	560.4
0.048	562.3
0.04804	561
0.04808	561.6
0.04812	562.7
0.04816	559.8
0.0482	563.6
0.04824	558.4
0.04828	564.3
0.04832	557.2
0.04836	564.2
0.0484	556.3
0.04844	563.7
0.04848	555.6
0.04852	563.5
0.04856	555.9
0.0486	562.8
0.04864	556.6
0.04868	561.8
0.04872	557.7
0.04876	561.6
0.0488	558
0.04884	562.6
0.04888	559
0.04892	562.3
0.04896	559
0.049	563.2
0.04904	560
0.04908	563.2
0.04912	560.9
0.04916	562.1
0.0492	561.7
0.04924	561.1
0.04928	562.6
0.04932	559.9
0.04936	564.2
0.0494	558
0.04944	564.7
0.04948	557.5
0.04952	564.5
0.04956	555.8
0.0496	563.9
0.04964	556
0.04968	563
0.04972	555.3
0.04976	562.4
0.0498	556.6
0.04984	562.1
0.04988	557.5
0.04992	562.2
0.04996	558.3
0.05	561.9
0.05004	559.1
0.05008	562.6
0.05012	559.7
0.05016	562.3
0.0502	559.7
0.05024	562.5
0.05028	561
0.05032	561.9
0.05036	561.9
0.0504	560.1
0.05044	563.3
0.05048	558.9
0.05052	564
0.05056	557.9
0.0506	564
0.05064	556.3
0.05068	564.1
0.05072	555.8
0.05076	563.4
0.0508	555.2
0.05084	563
0.05088	556.3
0.05092	562
0.05096	557.3
0.051	562
0.05104	557.8
0.05108	561.9
0.05112	558.5
0.05116	562.5
0.0512	559.2
0.05124	562.5
0.05128	559.6
0.05132	562.7
0.05136	560.4
0.0514	562.4
0.05144	561.1
0.05148	561.4
0.05152	562.4
0.05156	559.9
0.0516	563.6
0.05164	558.3
0.05168	564.2
0.05172	556.9
0.05176	564.1
0.0518	555.9
0.05184	564
0.05188	555.6
0.05192	563.3
0.05196	555.9
0.052	562.6
0.05204	556.3
0.05208	562
0.05212	557.3
0.05216	561.8
0.0522	559
0.05224	561.9
0.05228	558.6
0.05232	562.3
0.05236	559.6
0.0524	563
0.05244	559.7
0.05248	562.4
0.05252	560.9
0.05256	562.3
0.0526	562
0.05264	560.6
0.05268	563.3
0.05272	559.4
0.05276	564.1
0.0528	557.6
0.05284	563.9
0.05288	556.3
0.05292	563.5
0.05296	555.5
0.053	563.7
0.05304	555.5
0.05308	562.9
0.05312	556.3
0.05316	561.5
0.0532	556.6
0.05324	562.6
0.05328	557.5
0.05332	561.9
0.05336	558.3
0.0534	562
0.05344	559
0.05348	562.4
0.05352	559.6
0.05356	562.6
0.0536	560
0.05364	562.5
0.05368	560.9
0.05372	561.6
0.05376	562
0.0538	560.4
0.05384	563.1
0.05388	558.6
0.05392	564
0.05396	557.3
0.054	564.2
0.05404	556.2
0.05408	563.7
0.05412	555.6
0.05416	563.4
0.0542	555.7
0.05424	562.6
0.05428	556.2
0.05432	562.2
0.05436	557.2
0.0544	561.8
0.05444	558
0.05448	561.8
0.05452	558.2
0.05456	562
0.0546	559.2
0.05464	562.5
0.05468	559.8
0.05472	562.7
0.05476	560.6
0.0548	561.8
0.05484	561.5
0.05488	561.5
0.05492	562.5
0.05496	559.8
0.055	563.4
0.05504	558.5
0.05508	564.1
0.05512	556.8
0.05516	564.3
0.0552	555.7
0.05524	563.6
0.05528	555.6
0.05532	563.1
0.05536	555.9
0.0554	562.3
0.05544	556.6
0.05548	562
0.05552	557.4
0.05556	561.7
0.0556	558
0.05564	561.9
0.05568	558.8
0.05572	562.1
0.05576	559.1
0.0558	562.6
0.05584	560
0.05588	563.6
0.05592	560.3
0.05596	562
0.056	561.2
0.05604	560.9
0.05608	563.2
0.05612	559.4
0.05616	563.7
0.0562	557.4
0.05624	564.2
0.05628	556.4
0.05632	564
0.05636	556
0.0564	563.7
0.05644	555.6
0.05648	563.6
0.05652	555.9
0.05656	562.6
0.0566	556.4
0.05664	561.5
0.05668	557.8
0.05672	562
0.05676	558
0.0568	562.1
0.05684	559.1
0.05688	562.4
0.05692	559.4
0.05696	562.7
0.057	560
0.05704	562.9
0.05708	560.9
0.05712	561.8
0.05716	562.1
0.0572	560.4
0.05724	563.6
0.05728	558.8
0.05732	564
0.05736	557.4
0.0574	564.3
0.05744	556.3
0.05748	564
0.05752	555.7
0.05756	563.5
0.0576	555.8
0.05764	562.9
0.05768	555.9
0.05772	562.6
0.05776	557.2
0.0578	561.8
0.05784	557.7
0.05788	561.8
0.05792	558.6
0.05796	562.4
0.058	559.4
0.05804	562.6
0.05808	559.5
0.05812	562.5
0.05816	560.6
0.0582	562.8
0.05824	561.4
0.05828	561.2
0.05832	562.1
0.05836	560.5
0.0584	563
0.05844	558.8
0.05848	563.8
0.05852	557.3
0.05856	564.4
0.0586	556
0.05864	564.1
0.05868	555.3
0.05872	563.5
0.05876	555.5
0.0588	563.1
0.05884	556.3
0.05888	562.1
0.05892	557.2
0.05896	561.5
0.059	557.7
0.05904	562.3
0.05908	558.8
0.05912	562.4
0.05916	559.5
0.0592	562.4
0.05924	560.3
0.05928	562.8
0.05932	560.2
0.05936	562.7
0.0594	561.6
0.05944	561.5
0.05948	562.6
0.05952	560.1
0.05956	563.3
0.0596	558.2
0.05964	564.5
0.05968	557.1
0.05972	564.3
0.05976	555.6
0.0598	563.3
0.05984	555.7
0.05988	563.3
0.05992	555.7
0.05996	562.6
0.06	556.2
0.06004	562.4
0.06008	557.7
0.06012	562.2
0.06016	558.3
0.0602	561.8
0.06024	558.8
0.06028	562.7
0.06032	559.5
0.06036	563.3
0.0604	559.6
0.06044	563.1
0.06048	561.5
0.06052	562.5
0.06056	562.2
0.0606	560.8
0.06064	563.1
0.06068	559.9
0.06072	564.1
0.06076	558
0.0608	564.3
0.06084	556.6
0.06088	564.3
0.06092	555.7
0.06096	563.7
0.061	555.7
0.06104	562.8
0.06108	556.1
0.06112	562.2
0.06116	556.6
0.0612	562.1
0.06124	557.7
0.06128	562.1
0.06132	558.2
0.06136	562.3
0.0614	558.8
0.06144	562.3
0.06148	559.8
0.06152	562.8
0.06156	560.3
0.0616	562.8
0.06164	561.1
0.06168	561.8
0.06172	562.4
0.06176	560.4
0.0618	563.4
0.06184	559
0.06188	564.1
0.06192	557.4
0.06196	564.6
0.062	556.3
0.06204	564.2
0.06208	556
0.06212	563.4
0.06216	555.9
0.0622	563.8
0.06224	556.4
0.06228	561.8
0.06232	557.5
0.06236	562
0.0624	558.1
0.06244	561.7
0.06248	558.8
0.06252	562.6
0.06256	558.7
0.0626	562.6
0.06264	560
0.06268	563.2
0.06272	560.4
0.06276	562.1
0.0628	561.7
0.06284	561.5
0.06288	563
0.06292	560
0.06296	563
0.063	559
0.06304	564.3
0.06308	557.7
0.06312	564.5
0.06316	556.2
0.0632	563.7
0.06324	556.4
0.06328	563.4
0.06332	556
0.06336	563
0.0634	556.9
0.06344	562.2
0.06348	557.6
0.06352	562.4
0.06356	558.2
0.0636	562.2
0.06364	559
0.06368	562.6
0.06372	559.9
0.06376	563.1
0.0638	560.2
0.06384	562.9
0.06388	560.6
0.06392	562.4
0.06396	562
0.064	561.2
0.06404	563.2
0.06408	559.1
0.06412	564.3
0.06416	557.8
0.0642	564.5
0.06424	556.5
0.06428	564.2
0.06432	556.1
0.06436	563.8
0.0644	556.1
0.06444	562.9
0.06448	556.2
0.06452	562.3
0.06456	557
0.0646	562.2
0.06464	557.9
0.06468	562.1
0.06472	558.6
0.06476	562.7
0.0648	559.5
0.06484	562.6
0.06488	559.9
0.06492	562.8
0.06496	560.5
0.065	562.6
0.06504	561.2
0.06508	561.8
0.06512	562.1
0.06516	560.7
0.0652	563.4
0.06524	559.6
0.06528	564
0.06532	557.3
0.06536	564.2
0.0654	556.3
0.06544	564.3
0.06548	555.9
0.06552	563.3
0.06556	555.8
0.0656	563
0.06564	556.3
0.06568	562.4
0.06572	556.8
0.06576	562.1
0.0658	558.1
0.06584	562.1
0.06588	558.9
0.06592	562.4
0.06596	559.2
0.066	562.8
0.06604	559.7
0.06608	563.2
0.06612	560.4
0.06616	562.8
0.0662	561.3
0.06624	561.9
0.06628	563
0.06632	560.2
0.06636	563.7
0.0664	558.4
0.06644	564.2
0.06648	557.4
0.06652	564.2
0.06656	556.3
0.0666	564.2
0.06664	555.8
0.06668	563
0.06672	556
0.06676	562.4
0.0668	556.8
0.06684	562.2
0.06688	557.7
0.06692	562.1
0.06696	558
0.067	562
0.06704	559.3
0.06708	562.6
0.06712	559.6
0.06716	562.6
0.0672	560
0.06724	562.5
0.06728	561
0.06732	562.7
0.06736	562
0.0674	561
0.06744	563.3
0.06748	559
0.06752	564
0.06756	557.5
0.0676	564.4
0.06764	556.4
0.06768	564.1
0.06772	556.1
0.06776	563.3
0.0678	556
0.06784	562.7
0.06788	556.2
0.06792	562.7
0.06796	556.8
0.068	562.2
0.06804	557.7
0.06808	561.8
0.06812	558.8
0.06816	562.6
0.0682	559.1
0.06824	562.8
0.06828	559.5
0.06832	562.9
0.06836	560.4
0.0684	562.6
0.06844	561.3
0.06848	561.7
0.06852	562.6
0.06856	560.6
0.0686	563.3
0.06864	558.7
0.06868	564.2
0.06872	557.3
0.06876	564.5
0.0688	556.2
0.06884	564.6
0.06888	555.4
0.06892	563.7
0.06896	555.7
0.069	562.6
0.06904	557.1
0.06908	562.2
0.06912	557.1
0.06916	562
0.0692	558
0.06924	562.1
0.06928	558.6
0.06932	562.3
0.06936	559.3
0.0694	563.3
0.06944	559.2
0.06948	562.9
0.06952	561.1
0.06956	562.1
0.0696	561.3
0.06964	561.3
0.06968	562.9
0.06972	559.3
0.06976	563.5
0.0698	557.7
0.06984	564.2
0.06988	557.1
0.06992	563.9
0.06996	556
0.07	563.6
0.07004	555.4
0.07008	563.3
0.07012	556.1
0.07016	562.4
0.0702	556.8
0.07024	561.9
0.07028	557.7
0.07032	562
0.07036	558.3
0.0704	561.8
0.07044	559
0.07048	562.6
0.07052	559.2
0.07056	562.8
0.0706	560.2
0.07064	562.5
0.07068	561
0.07072	562
0.07076	561.8
0.0708	560.3
0.07084	563.3
0.07088	558.2
0.07092	564.3
0.07096	556.9
0.071	564.6
0.07104	556.2
0.07108	563.6
0.07112	556
0.07116	563.1
0.0712	555.8
0.07124	562.8
0.07128	555.9
0.07132	562.1
0.07136	557.2
0.0714	562.1
0.07144	557.8
0.07148	561.8
0.07152	558.7
0.07156	562.3
0.0716	558.9
0.07164	562.7
0.07168	560.1
0.07172	562.7
0.07176	560.9
0.0718	561.9
0.07184	561.5
0.07188	561.3
0.07192	562.7
0.07196	559.7
0.072	563.3
0.07204	558.2
0.07208	563.9
0.07212	556.7
0.07216	564.5
0.0722	555.6
0.07224	563.6
0.07228	555.4
0.07232	562.8
0.07236	556.1
0.0724	562.4
0.07244	556.7
0.07248	561.3
0.07252	557.3
0.07256	561.7
0.0726	557.9
0.07264	562.3
0.07268	558.7
0.07272	562.5
0.07276	559.3
0.0728	562.7
0.07284	560.4
0.07288	563
0.07292	560.3
0.07296	561.5
0.073	562.2
0.07304	561.1
0.07308	563
0.07312	559
0.07316	564
0.0732	557.6
0.07324	564.2
0.07328	556.1
0.07332	564.1
0.07336	556
0.0734	563.2
0.07344	555.6
0.07348	562.9
0.07352	556.3
0.07356	562.2
0.0736	556.8
0.07364	561.8
0.07368	557.8
0.07372	561.8
0.07376	558.9
0.0738	561.7
0.07384	558.9
0.07388	562.4
0.07392	559.5
0.07396	562.8
0.074	559.9
0.07404	562.2
0.07408	560.9
0.07412	561.8
0.07416	562.1
0.0742	560.1
0.07424	563
0.07428	558.6
0.07432	564.2
0.07436	557
0.0744	564.2
0.07444	556.2
0.07448	564
0.07452	555.6
0.07456	563.3
0.0746	555.8
0.07464	562.8
0.07468	556.2
0.07472	561.9
0.07476	557.2
0.0748	561.6
0.07484	557.8
0.07488	562.4
0.07492	558.2
0.07496	562.2
0.075	559.2
0.07504	562.6
0.07508	559.9
0.07512	562.5
0.07516	560.3
0.0752	562.6
0.07524	561.2
0.07528	561.3
0.07532	562.2
0.07536	559.8
0.0754	563.5
0.07544	558.4
0.07548	564
0.07552	556.2
0.07556	564.2
0.0756	555.9
0.07564	564.1
0.07568	555.7
0.07572	562.9
0.07576	555.6
0.0758	562.6
0.07584	556.4
0.07588	561.7
0.07592	557.9
0.07596	561.6
0.076	558.1
0.07604	561.8
0.07608	558.8
0.07612	562.1
0.07616	559.1
0.0762	562.8
0.07624	559.9
0.07628	562.6
0.07632	560.3
0.07636	562.1
0.0764	561.6
0.07644	561.1
0.07648	562.8
0.07652	559.3
0.07656	563.2
0.0766	557.8
0.07664	564.7
0.07668	556.9
0.07672	564.2
0.07676	555.6
0.0768	563.6
0.07684	555.4
0.07688	563.3
0.07692	556.1
0.07696	562.1
0.077	556.9
0.07704	562
0.07708	557.4
0.07712	561.9
0.07716	558.1
0.0772	562.2
0.07724	558.7
0.07728	562.4
0.07732	559.7
0.07736	562.7
0.0774	559.9
0.07744	562.6
0.07748	560.8
0.07752	562.2
0.07756	561.5
0.0776	560.8
0.07764	563.1
0.07768	559.4
0.07772	564.1
0.07776	557.5
0.0778	564.4
0.07784	556.7
0.07788	564.3
0.07792	555.8
0.07796	563.6
0.078	555.6
0.07804	563
0.07808	555.9
0.07812	562.2
0.07816	556.8
0.0782	561.7
0.07824	557.8
0.07828	561.8
0.07832	558.9
0.07836	561.9
0.0784	558.9
0.07844	562.5
0.07848	559.6
0.07852	562.7
0.07856	560.2
0.0786	562.4
0.07864	560.9
0.07868	562.1
0.07872	561.9
0.07876	561.2
0.0788	563
0.07884	559
0.07888	563.6
0.07892	557.6
0.07896	564.2
0.079	556.7
0.07904	564.4
0.07908	555.1
0.07912	563.3
0.07916	555.8
0.0792	563
0.07924	556
0.07928	562.3
0.07932	556.2
0.07936	561.4
0.0794	557.8
0.07944	562.1
0.07948	558.2
0.07952	561.9
0.07956	558.9
0.0796	562.3
0.07964	559.5
0.07968	563.1
0.07972	560.3
0.07976	563
0.0798	561
0.07984	561.3
0.07988	562.6
0.07992	560.4
[truncated: 98,001 more rows]

## Sheet: Sheet1
		100	50
time	data	butfilt1	Strain
0.756	39.29	37.0262	0.259476
0.75604	35.17	36.959	0.26082
0.75608	39.19	36.8908	0.262183
0.75612	35.46	36.8218	0.263565
0.75616	38.81	36.7518	0.264965
0.7562	35.6	36.6809	0.266383
0.75624	39.53	36.6091	0.267818
0.75628	36.75	36.5364	0.269272
0.75632	38.62	36.4628	0.270743
0.75636	36.61	36.3884	0.272232
0.7564	38.57	36.3131	0.273738
0.75644	37.37	36.237	0.27526
0.75648	36.89	36.16	0.276799
0.75652	38.28	36.0822	0.278355
0.75656	35.36	36.0037	0.279927
0.7566	38.81	35.9243	0.281515
0.75664	33.73	35.8441	0.283118
0.75668	38.62	35.7632	0.284736
0.75672	33.25	35.6815	0.28637
0.75676	38.04	35.5991	0.288018
0.7568	32.25	35.5159	0.289681
0.75684	37.99	35.4321	0.291358
0.75688	32.01	35.3476	0.293049
0.75692	37.71	35.2623	0.294753
0.75696	32.11	35.1765	0.296471
0.757	36.46	35.0899	0.298201
0.75704	32.3	35.0028	0.299945
0.75708	36.13	34.915	0.301701
0.75712	32.78	34.8266	0.303469
0.75716	36.27	34.7376	0.305249
0.7572	32.78	34.648	0.307041
0.75724	36.13	34.5578	0.308844
0.75728	32.92	34.4671	0.310658
0.75732	36.75	34.3758	0.312484
0.75736	33.02	34.284	0.31432
0.7574	36.32	34.1917	0.316166
0.75744	34.16	34.0989	0.318023
0.75748	35.36	34.0055	0.319889
0.75752	35.03	33.9117	0.321766
0.75756	33.4	33.8174	0.323651
0.7576	35.46	33.7227	0.325546
0.75764	32.25	33.6275	0.327449
0.75768	36.03	33.5319	0.329361
0.75772	31.24	33.4359	0.331282
0.75776	35.7	33.3395	0.33321
0.7578	30.24	33.2427	0.335145
0.75784	35.27	33.1456	0.337088
0.75788	29.57	33.0481	0.339038
0.75792	34.69	32.9503	0.340995
0.75796	29.38	32.8521	0.342958
0.758	34.02	32.7536	0.344927
0.75804	29.43	32.6549	0.346902
0.75808	33.4	32.5559	0.348883
0.75812	29.52	32.4566	0.350869
0.75816	33.45	32.357	0.35286
0.7582	30.05	32.2572	0.354856
0.75824	33.35	32.1572	0.356857
0.75828	29.95	32.0569	0.358862
0.75832	33.64	31.9565	0.360871
0.75836	30.34	31.8558	0.362884
0.7584	33.45	31.7549	0.364901
0.75844	30.43	31.6539	0.366921
0.75848	33.35	31.5527	0.368945
0.75852	31.48	31.4514	0.370972
0.75856	32.25	31.3499	0.373002
0.7586	32.06	31.2483	0.375034
0.75864	31.1	31.1466	0.377068
0.75868	32.73	31.0447	0.379105
0.75872	29.23	30.9428	0.381144
0.75876	33.25	30.8408	0.383184
0.7588	27.99	30.7387	0.385225
0.75884	32.73	30.6366	0.387268
0.75888	27.18	30.5344	0.389312
0.75892	32.15	30.4322	0.391356
0.75896	26.84	30.33	0.3934
0.759	31.91	30.2278	0.395445
0.75904	26.84	30.1255	0.397489
0.75908	31.39	30.0233	0.399533
0.75912	26.65	29.9212	0.401577
0.75916	30.57	29.819	0.40362
0.7592	27.08	29.7169	0.405662
0.75924	30.86	29.6149	0.407702
0.75928	26.79	29.5129	0.409742
0.75932	30.77	29.411	0.41178
0.75936	27.22	29.3092	0.413816
0.7594	30.67	29.2075	0.41585
0.75944	27.51	29.1059	0.417883
0.75948	31.1	29.0044	0.419913
0.75952	27.75	28.903	0.421941
0.75956	30.19	28.8017	0.423966
0.7596	29.04	28.7006	0.425989
0.75964	29.04	28.5996	0.428009
0.75968	29.66	28.4987	0.430025
0.75972	27.85	28.3981	0.432039
0.75976	29.52	28.2976	0.434049
0.7598	26.41	28.1972	0.436055
0.75984	30.19	28.0971	0.438058
0.75988	25.17	27.9972	0.440057
0.75992	30.29	27.8974	0.442052
0.75996	24.26	27.7979	0.444042
0.76	29.62	27.6986	0.446028
0.76004	24.21	27.5996	0.448008
0.76008	29.38	27.5008	0.449985
0.76012	23.87	27.4022	0.451956
0.76016	28.42	27.3039	0.453921
0.7602	24.11	27.2059	0.455882
0.76024	27.85	27.1082	0.457837
0.76028	24.3	27.0107	0.459786
0.76032	28.13	26.9135	0.46173
0.76036	24.45	26.8166	0.463667
0.7604	28.13	26.7201	0.465599
0.76044	24.35	26.6238	0.467524
0.76048	28.18	26.5278	0.469444
0.76052	25.26	26.4322	0.471357
0.76056	28.23	26.3368	0.473263
0.7606	25.45	26.2418	0.475163
0.76064	26.98	26.1472	0.477056
0.76068	26.7	26.0528	0.478943
0.76072	26.51	25.9589	0.480823
0.76076	26.84	25.8652	0.482696
0.7608	24.5	25.7719	0.484561
0.76084	27.51	25.679	0.48642
0.76088	23.15	25.5865	0.488271
0.76092	27.89	25.4943	0.490114
0.76096	22.48	25.4025	0.49195
0.761	27.18	25.3111	0.493778
0.76104	21.86	25.2201	0.495599
0.76108	26.89	25.1295	0.497411
0.76112	21.86	25.0392	0.499215
0.76116	26.41	24.9494	0.501011
0.7612	21.58	24.8601	0.502799
0.76124	25.74	24.7711	0.504578
0.76128	21.43	24.6825	0.506349
0.76132	25.31	24.5944	0.508111
0.76136	21.77	24.5067	0.509865
0.7614	25.45	24.4195	0.51161
0.76144	22.25	24.3327	0.513346
0.76148	25.84	24.2463	0.515074
0.76152	22.25	24.1604	0.516793
0.76156	25.88	24.0749	0.518503
0.7616	22.82	23.9898	0.520204
0.76164	25.55	23.9052	0.521896
0.76168	23.39	23.821	0.523579
0.76172	24.73	23.7373	0.525254
0.76176	24.06	23.6541	0.526919
0.7618	23.44	23.5713	0.528575
0.76184	24.64	23.4889	0.530222
0.76188	22.39	23.407	0.53186
0.76192	25.21	23.3256	0.533488
0.76196	21.19	23.2446	0.535107
0.762	25.45	23.1641	0.536717
0.76204	20.04	23.0841	0.538317
0.76208	25.17	23.0046	0.539908
0.76212	19.76	22.9255	0.54149
0.76216	24.73	22.8469	0.543061
0.7622	19.18	22.7688	0.544623
0.76224	24.21	22.6912	0.546176
0.76228	18.89	22.6141	0.547718
0.76232	23.15	22.5375	0.549251
0.76236	19.56	22.4613	0.550774
0.7624	23.3	22.3856	0.552287
0.76244	19.76	22.3105	0.553791
0.76248	23.15	22.2358	0.555284
0.76252	20.09	22.1616	0.556768
0.76256	23.78	22.0879	0.558242
0.7626	20.57	22.0147	0.559706
0.76264	24.21	21.9419	0.561161
0.76268	21	21.8697	0.562606
0.76272	23.83	21.7979	0.564041
0.76276	21.05	21.7266	0.565467
0.7628	22.96	21.6558	0.566883
0.76284	22.68	21.5855	0.568289
0.76288	22.01	21.5157	0.569686
0.76292	22.96	21.4463	0.571073
0.76296	20.71	21.3775	0.572451
0.763	24.02	21.3091	0.573818
0.76304	20.57	21.2412	0.575176
0.76308	24.16	21.1738	0.576525
0.76312	18.61	21.1068	0.577863
0.76316	24.02	21.0404	0.579192
0.7632	18.03	20.9745	0.58051
0.76324	22.68	20.909	0.581819
0.76328	17.75	20.8441	0.583118
0.76332	22.53	20.7797	0.584407
0.76336	17.55	20.7157	0.585685
0.7634	21.43	20.6523	0.586954
0.76344	18.03	20.5894	0.588212
0.76348	22.05	20.527	0.58946
0.76352	17.89	20.4651	0.590698
0.76356	22.15	20.4037	0.591926
0.7636	18.51	20.3428	0.593144
0.76364	22.15	20.2825	0.594351
0.76368	18.8	20.2226	0.595548
0.76372	22.39	20.1633	0.596735
0.76376	19.52	20.1044	0.597912
0.7638	21.67	20.0461	0.599078
0.76384	20.14	19.9883	0.600234
0.76388	21.05	19.931	0.60138
0.76392	21	19.8742	0.602516
0.76396	20.19	19.818	0.603641
0.764	21.38	19.7622	0.604756
0.76404	18.89	19.707	0.60586
0.76408	22.2	19.6523	0.606954
0.76412	17.99	19.5981	0.608037
0.76416	22.44	19.5445	0.60911
0.7642	17.03	19.4914	0.610172
0.76424	21.43	19.4388	0.611223
0.76428	16.21	19.3868	0.612263
0.76432	21.24	19.3354	0.613293
0.76436	15.93	19.2844	0.614311
0.7644	20.47	19.2341	0.615319
0.76444	16.12	19.1843	0.616315
0.76448	20.28	19.135	0.6173
0.76452	16.41	19.0863	0.618274
0.76456	20.33	19.0382	0.619237
0.7646	17.08	18.9906	0.620188
0.76464	20.57	18.9436	0.621128
0.76468	16.84	18.8971	0.622057
0.76472	20.76	18.8513	0.622975
0.76476	17.08	18.8059	0.623881
0.7648	20.86	18.7612	0.624776
0.76484	17.17	18.717	0.62566
0.76488	20.33	18.6734	0.626532
0.76492	18.27	18.6304	0.627393
0.76496	19.42	18.5879	0.628242
0.765	19.28	18.546	0.62908
0.76504	18.66	18.5047	0.629906
0.76508	20.33	18.4639	0.630721
0.76512	16.84	18.4238	0.631524
0.76516	20.67	18.3842	0.632316
0.7652	16.12	18.3452	0.633096
0.76524	20.86	18.3068	0.633864
0.76528	15.02	18.269	0.634621
0.76532	20.14	18.2317	0.635366
0.76536	14.92	18.1951	0.636098
0.7654	19.61	18.159	0.636819
0.76544	14.68	18.1236	0.637528
0.76548	19.18	18.0887	0.638225
0.76552	14.73	18.0545	0.63891
0.76556	18.61	18.0208	0.639584
0.7656	15.21	17.9878	0.640245
0.76564	19.04	17.9553	0.640894
0.76568	15.54	17.9235	0.641531
0.76572	19.13	17.8922	0.642156
0.76576	15.78	17.8615	0.642769
0.7658	19.56	17.8315	0.64337
0.76584	15.97	17.802	0.64396
0.76588	19.71	17.7731	0.644538
0.76592	16.84	17.7448	0.645103
0.76596	19.23	17.7171	0.645658
0.766	17.46	17.69	0.6462
0.76604	18.75	17.6635	0.646731
0.76608	19.23	17.6375	0.64725
0.76612	17.99	17.6121	0.647757
0.76616	19.23	17.5874	0.648253
0.7662	16.74	17.5631	0.648737
0.76624	20.38	17.5395	0.649209
0.76628	15.54	17.5165	0.64967
0.76632	19.66	17.494	0.650119
0.76636	14.68	17.4722	0.650557
0.7664	19.66	17.4509	0.650982
0.76644	13.92	17.4302	0.651396
0.76648	19.28	17.4101	0.651798
0.76652	14.73	17.3906	0.652189
0.76656	18.03	17.3716	0.652567
0.7666	14.44	17.3533	0.652934
0.76664	18.7	17.3355	0.653289
0.76668	14.16	17.3184	0.653633
0.76672	18.66	17.3018	0.653964
0.76676	14.59	17.2858	0.654284
0.7668	18.66	17.2704	0.654592
0.76684	15.07	17.2555	0.654889
0.76688	18.7	17.2413	0.655174
0.76692	15.59	17.2276	0.655448
0.76696	19.13	17.2145	0.65571
0.767	16.02	17.202	0.655961
0.76704	18.89	17.19	0.6562
0.76708	17.36	17.1786	0.656429
0.76712	18.94	17.1677	0.656645
0.76716	17.79	17.1574	0.656851
0.7672	17.27	17.1477	0.657046
0.76724	18.99	17.1386	0.657229
0.76728	16.02	17.13	0.657401
0.76732	19.47	17.1219	0.657562
0.76736	14.87	17.1144	0.657712
0.7674	19.37	17.1075	0.65785
0.76744	14.2	17.1011	0.657978
0.76748	19.42	17.0953	0.658094
0.76752	13.92	17.09	0.6582
0.76756	18.61	17.0853	0.658294
0.7676	14.11	17.0811	0.658377
0.76764	18.61	17.0775	0.658449
0.76768	14.06	17.0745	0.65851
0.76772	17.94	17.072	0.65856
0.76776	14.4	17.07	0.658599
0.7678	17.79	17.0686	0.658627
0.76784	14.63	17.0678	0.658644
0.76788	17.99	17.0675	0.658651
0.76792	15.16	17.0677	0.658646
0.76796	18.8	17.0684	0.658631
0.768	15.54	17.0697	0.658605
0.76804	19.37	17.0715	0.658569
0.76808	16.12	17.0739	0.658523
0.76812	18.75	17.0767	0.658466
0.76816	17.12	17.0801	0.658398
0.7682	18.13	17.084	0.658321
0.76824	17.89	17.0884	0.658233
0.76828	17.08	17.0933	0.658135
0.76832	18.51	17.0987	0.658027
0.76836	15.59	17.1046	0.657909
0.7684	19.47	17.111	0.657781
0.76844	14.25	17.1179	0.657642
0.76848	20.28	17.1253	0.657494
0.76852	14.06	17.1332	0.657336
0.76856	18.94	17.1416	0.657168
0.7686	13.92	17.1505	0.656991
0.76864	19.13	17.1598	0.656803
0.76868	13.96	17.1697	0.656606
0.76872	18.27	17.1801	0.656399
0.76876	14.35	17.1909	0.656182
0.7688	18.08	17.2022	0.655956
0.76884	14.11	17.214	0.65572
0.76888	18.13	17.2262	0.655475
0.76892	15.26	17.239	0.655221
0.76896	18.7	17.2522	0.654957
0.769	15.02	17.2658	0.654684
0.76904	19.33	17.2799	0.654402
0.76908	15.93	17.2944	0.654111
0.76912	19.09	17.3094	0.653812
0.76916	16.6	17.3248	0.653503
0.7692	19.04	17.3407	0.653186
0.76924	17.75	17.357	0.652861
0.76928	17.94	17.3736	0.652527
0.76932	17.94	17.3908	0.652185
0.76936	17.27	17.4083	0.651834
0.7694	19.47	17.4262	0.651476
0.76944	16.26	17.4446	0.651109
0.76948	19.71	17.4633	0.650734
0.76952	15.35	17.4824	0.650351
0.76956	20.19	17.502	0.649961
0.7696	15.11	17.5219	0.649562
0.76964	20	17.5422	0.649156
0.76968	14.4	17.5629	0.648742
0.76972	19.76	17.584	0.64832
0.76976	14.49	17.6055	0.64789
0.7698	17.84	17.6273	0.647453
0.76984	15.02	17.6496	0.647009
0.76988	18.8	17.6722	0.646557
0.76992	15.26	17.6951	0.646098
0.76996	18.51	17.7184	0.645631
0.77	15.83	17.7421	0.645158
0.77004	19.33	17.7661	0.644677
0.77008	16.6	17.7905	0.64419
0.77012	19.61	17.8152	0.643696
0.77016	16.65	17.8403	0.643195
0.7702	19.85	17.8656	0.642687
0.77024	17.17	17.8913	0.642173
0.77028	19.37	17.9174	0.641653
0.77032	18.42	17.9437	0.641126
0.77036	18.75	17.9703	0.640594
0.7704	18.7	17.9973	0.640055
0.77044	17.75	18.0245	0.63951
0.77048	20.04	18.052	0.638959
0.77052	16.84	18.0799	0.638403
0.77056	20.95	18.108	0.63784
0.7706	15.78	18.1364	0.637272
0.77064	20.76	18.1651	0.636698
0.77068	15.64	18.1941	0.636119
0.77072	20.43	18.2233	0.635534
0.77076	14.97	18.2528	0.634943
0.7708	19.61	18.2826	0.634347
0.77084	14.92	18.3127	0.633746
0.77088	19.71	18.343	0.633139
0.77092	15.74	18.3736	0.632527
0.77096	19.42	18.4045	0.63191
0.771	16.21	18.4356	0.631288
0.77104	20.04	18.467	0.630661
0.77108	16.79	18.4985	0.630029
0.77112	20	18.5304	0.629392
0.77116	16.74	18.5624	0.628751
0.7712	20.62	18.5947	0.628105
0.77124	17.55	18.6273	0.627455
0.77128	20.47	18.66	0.6268
0.77132	18.13	18.6929	0.626141
0.77136	20.19	18.7261	0.625479
0.7714	19.23	18.7594	0.624812
0.77144	19.28	18.793	0.624141
0.77148	20.38	18.8267	0.623466
0.77152	18.94	18.8606	0.622787
0.77156	21.48	18.8948	0.622105
0.7716	17.41	18.9291	0.621419
0.77164	21.62	18.9635	0.620729
0.77168	16.6	18.9982	0.620036
0.77172	21.58	19.033	0.619339
0.77176	15.88	19.068	0.618639
0.7718	21.19	19.1032	0.617936
0.77184	15.59	19.1386	0.617229
0.77188	20.76	19.1741	0.616518
0.77192	16.26	19.2098	0.615805
0.77196	20.95	19.2456	0.615088
0.772	16.79	19.2816	0.614368
0.77204	20.76	19.3177	0.613645
0.77208	17.32	19.354	0.612919
0.77212	21.19	19.3905	0.61219
0.77216	17.7	19.4271	0.611459
0.7722	21.53	19.4638	0.610724
0.77224	18.03	19.5006	0.609987
0.77228	21.53	19.5376	0.609248
0.77232	18.46	19.5747	0.608506
0.77236	21.67	19.6119	0.607762
0.7724	19.47	19.6493	0.607015
0.77244	21.19	19.6867	0.606266
0.77248	20.81	19.7243	0.605515
0.77252	20.33	19.7619	0.604761
0.77256	22.25	19.7997	0.604006
0.7726	19.37	19.8376	0.603249
0.77264	23.25	19.8755	0.602489
0.77268	18.08	19.9136	0.601728
0.77272	22.82	19.9518	0.600964
0.77276	17.17	19.9901	0.600199
0.7728	22.53	20.0284	0.599431
0.77284	16.79	20.0669	0.598662
0.77288	22.05	20.1055	0.59789
0.77292	16.74	20.1442	0.597117
0.77296	21.43	20.1829	0.596341
0.773	17.36	20.2218	0.595564
0.77304	21.48	20.2608	0.594784
0.77308	17.84	20.2998	0.594003
0.77312	22.01	20.339	0.59322
0.77316	17.79	20.3782	0.592435
0.7732	21.77	20.4176	0.591649
0.77324	18.85	20.457	0.59086
0.77328	22.39	20.4965	0.59007
0.77332	19.09	20.5361	0.589279
0.77336	22.58	20.5757	0.588485
0.7734	19.56	20.6155	0.587691
0.77344	22.25	20.6553	0.586895
0.77348	20.81	20.6951	0.586097
0.77352	22.44	20.7351	0.585298
0.77356	21.77	20.7751	0.584498
0.7736	21.38	20.8152	0.583697
0.77364	22.39	20.8553	0.582894
0.77368	20.62	20.8955	0.58209
0.77372	23.44	20.9358	0.581284
0.77376	19.18	20.9761	0.580478
0.7738	23.87	21.0165	0.57967
0.77384	18.32	21.057	0.57886
0.77388	23.63	21.0975	0.57805
0.77392	17.79	21.1381	0.577238
0.77396	23.39	21.1788	0.576425
0.774	18.08	21.2195	0.57561
0.77404	22.87	21.2603	0.574794
0.77408	18.27	21.3012	0.573977
0.77412	22.63	21.3421	0.573158
0.77416	19.09	21.3831	0.572338
0.7742	22.72	21.4242	0.571517
0.77424	18.94	21.4653	0.570694
0.77428	22.68	21.5065	0.56987
0.77432	19.71	21.5478	0.569044
0.77436	23.44	21.5891	0.568218
0.7744	20	21.6305	0.56739
0.77444	23.44	21.6719	0.566561
0.77448	20.52	21.7134	0.565731
0.77452	23.92	21.755	0.5649
0.77456	21.77	21.7966	0.564068
0.7746	23.3	21.8383	0.563235
0.77464	22.72	21.88	0.562401
0.77468	22.44	21.9217	0.561565
0.77472	23.73	21.9635	0.560729
0.77476	21.29	22.0054	0.559892
0.7748	24.4	22.0473	0.559054
0.77484	20.04	22.0893	0.558214
0.77488	24.73	22.1313	0.557374
0.77492	19.61	22.1734	0.556532
0.77496	24.54	22.2155	0.55569
0.775	18.89	22.2577	0.554846
0.77504	24.16	22.3	0.554001
0.77508	19.13	22.3423	0.553155
0.77512	24.21	22.3846	0.552308
0.77516	19.28	22.427	0.551459
0.7752	24.06	22.4695	0.550609
0.77524	19.8	22.5121	0.549759
0.77528	24.02	22.5547	0.548906
0.77532	20.04	22.5973	0.548053
0.77536	23.92	22.6401	0.547199
0.7754	20.81	22.6828	0.546343
0.77544	24.11	22.7257	0.545487
0.77548	21.14	22.7685	0.544629
0.77552	24.54	22.8115	0.543771
0.77556	22.01	22.8544	0.542911
0.7756	25.17	22.8975	0.542051
0.77564	22.68	22.9405	0.541189
0.77568	24.59	22.9837	0.540327
0.77572	23.97	23.0268	0.539463
0.77576	23.63	23.07	0.538599
0.7758	25.02	23.1133	0.537734
0.77584	22.48	23.1566	0.536868
0.77588	25.64	23.1999	0.536001
0.77592	21.14	23.2433	0.535133
0.77596	25.79	23.2868	0.534264
0.776	20.28	23.3303	0.533395
0.77604	25.6	23.3738	0.532524
0.77608	19.95	23.4174	0.531652
0.77612	25.79	23.4611	0.530779
0.77616	20.04	23.5048	0.529905
0.7762	24.59	23.5485	0.529029
0.77624	20.43	23.5924	0.528153
0.77628	24.78	23.6362	0.527275
0.77632	21.1	23.6802	0.526397
0.77636	24.78	23.7241	0.525517
0.7764	21.43	23.7682	0.524636
0.77644	24.88	23.8123	0.523755
0.77648	21.67	23.8564	0.522872
0.77652	25.21	23.9006	0.521988
0.77656	22.25	23.9448	0.521104
0.7766	25.88	23.9891	0.520218
0.77664	23.35	24.0334	0.519332
0.77668	25.93	24.0778	0.518445
0.77672	24.16	24.1222	0.517557
0.77676	25.74	24.1666	0.516668
0.7768	24.97	24.2111	0.515779
0.77684	24.93	24.2555	0.514889
0.77688	25.93	24.3001	0.513998
0.77692	23.2	24.3446	0.513107
0.77696	26.79	24.3892	0.512215
0.777	22.1	24.4339	0.511323
0.77704	27.18	24.4785	0.51043
0.77708	22.29	24.5232	0.509536
0.77712	27.32	24.5679	0.508641
0.77716	21.43	24.6127	0.507746
0.7772	26.46	24.6575	0.50685
0.77724	21.53	24.7023	0.505953
0.77728	26.7	24.7472	0.505056
0.77732	21.81	24.7921	0.504157
0.77736	26.12	24.8371	0.503258
0.7774	21.96	24.8821	0.502359
0.77744	25.84	24.9271	0.501459
0.77748	23.15	24.9721	0.500558
0.77752	25.98	25.0172	0.499656
0.77756	23.35	25.0623	0.498754
0.7776	26.36	25.1075	0.497851
0.77764	23.87	25.1526	0.496948
0.77768	27.27	25.1978	0.496044
0.77772	24.4	25.243	0.49514
0.77776	27.27	25.2883	0.494235
0.7778	25.45	25.3335	0.49333
0.77784	26.98	25.3788	0.492424
0.77788	26.36	25.4241	0.491519
0.77792	26.27	25.4694	0.490613
0.77796	27.22	25.5147	0.489706
0.778	24.4	25.56	0.488799
0.77804	28.04	25.6054	0.487892
0.77808	23.78	25.6508	0.486985
0.77812	28.56	25.6962	0.486077
0.77816	23.06	25.7416	0.485168
0.7782	28.28	25.787	0.48426
0.77824	23.01	25.8325	0.48335
0.77828	27.65	25.878	0.482441
0.77832	22.82	25.9235	0.48153
0.77836	28.04	25.969	0.480619
0.7784	23.06	26.0146	0.479708
0.77844	27.13	26.0602	0.478796
0.77848	23.39	26.1058	0.477884
0.77852	27.27	26.1515	0.47697
0.77856	23.83	26.1972	0.476057
0.7786	27.32	26.2429	0.475142
0.77864	24.45	26.2886	0.474228
0.77868	27.89	26.3344	0.473312
0.77872	25.17	26.3802	0.472397
0.77876	28.47	26.426	0.47148
0.7788	26.31	26.4718	0.470564
0.77884	28.42	26.5177	0.469646
0.77888	26.46	26.5636	0.468729
0.77892	27.7	26.6095	0.467811
0.77896	27.61	26.6554	0.466893
0.779	26.46	26.7013	0.465974
0.77904	28.28	26.7473	0.465055
0.77908	25.69	26.7932	0.464135
0.77912	29.09	26.8393	0.463215
0.77916	24.69	26.8853	0.462294
0.7792	29.57	26.9313	0.461373
0.77924	24.06	26.9774	0.460451
0.77928	29.86	27.0235	0.459529
0.77932	23.78	27.0697	0.458606
0.77936	28.66	27.1159	0.457683
0.7794	24.06	27.1621	0.456759
0.77944	28.37	27.2083	0.455834
0.77948	24.11	27.2546	0.454908
0.77952	28.18	27.3009	0.453982
0.77956	24.69	27.3472	0.453055
0.7796	28.9	27.3936	0.452128
0.77964	25.07	27.44	0.4512
0.77968	29.09	27.4865	0.450271
0.77972	25.6	27.5329	0.449342
0.77976	29.33	27.5794	0.448412
0.7798	26.41	27.6259	0.447481
0.77984	29.71	27.6725	0.44655
0.77988	26.98	27.719	0.445619
0.77992	29.38	27.7656	0.444687
0.77996	27.37	27.8122	0.443755
0.78	28.8	27.8589	0.442823
0.78004	28.95	27.9055	0.44189
0.78008	27.85	27.9522	0.440957
0.78012	30.19	27.9989	0.440023
0.78016	26.22	28.0456	0.439089
0.7802	30.34	28.0923	0.438154
0.78024	26.12	28.139	0.43722
0.78028	30.86	28.1858	0.436284
0.78032	25.36	28.2326	0.435349
0.78036	30.43	28.2794	0.434413
0.7804	25.02	28.3262	0.433476
0.78044	29.71	28.373	0.432539
0.78048	24.88	28.4199	0.431602
0.78052	29.62	28.4668	0.430664
0.78056	25.64	28.5137	0.429726
0.7806	30.14	28.5606	0.428787
0.78064	25.5	28.6076	0.427848
0.78068	30.1	28.6546	0.426909
0.78072	27.08	28.7015	0.425969
0.78076	30.53	28.7485	0.425029
0.7808	27.22	28.7955	0.424089
0.78084	30.57	28.8426	0.423149
0.78088	27.85	28.8896	0.422208
0.78092	30.96	28.9366	0.421268
0.78096	28.47	28.9836	0.420327
0.781	30.81	29.0307	0.419387
0.78104	29.52	29.0777	0.418446
0.78108	29.62	29.1247	0.417506
0.78112	30.96	29.1717	0.416565
0.78116	29.19	29.2188	0.415625
0.7812	31.68	29.2658	0.414685
0.78124	28.04	29.3128	0.413744
0.78128	32.06	29.3598	0.412804
0.78132	27.13	29.4068	0.411864
0.78136	32.15	29.4538	0.410924
0.7814	26.17	29.5008	0.409983
0.78144	31.53	29.5478	0.409043
0.78148	26.46	29.5949	0.408103
0.78152	31.34	29.6419	0.407162
0.78156	26.41	29.6889	0.406222
0.7816	30.96	29.7359	0.405281
0.78164	27.18	29.783	0.40434
0.78168	31.15	29.83	0.4034
0.78172	27.61	29.8771	0.402459
0.78176	31.2	29.9241	0.401518
0.7818	27.89	29.9712	0.400577
0.78184	31.58	30.0182	0.399636
0.78188	28.28	30.0653	0.398695
0.78192	32.15	30.1123	0.397754
0.78196	28.9	30.1594	0.396813
0.782	32.2	30.2064	0.395872
0.78204	29.52	30.2534	0.394932
0.78208	31.63	30.3004	0.393991
0.78212	31.1	30.3475	0.393051
0.78216	30.34	30.3945	0.392111
0.7822	32.44	30.4415	0.391171
0.78224	29.86	30.4884	0.390231
0.78228	33.21	30.5354	0.389292
0.78232	29.04	30.5824	0.388352
0.78236	33.35	30.6293	0.387413
0.7824	28.18	30.6763	0.386474
0.78244	33.3	30.7232	0.385535
0.78248	27.32	30.7702	0.384596
0.78252	32.78	30.8171	0.383658
0.78256	27.99	30.8641	0.382719
0.7826	32.54	30.911	0.38178
0.78264	27.8	30.9579	0.380842
0.78268	32.01	31.0048	0.379903
0.78272	28.13	31.0518	0.378964
0.78276	32.2	31.0987	0.378026
0.7828	28.9	31.1456	0.377087
0.78284	32.54	31.1926	0.376149
0.78288	29.43	31.2395	0.375211
0.78292	33.16	31.2864	0.374272
0.78296	29.33	31.3333	0.373334
0.783	33.21	31.3802	0.372397
0.78304	30.24	31.4271	0.371459
0.78308	33.21	31.4739	0.370522
0.78312	31.15	31.5208	0.369585
0.78316	32.3	31.5676	0.368648
0.7832	32.25	31.6144	0.367711
0.78324	32.15	31.6612	0.366775
0.78328	33.59	31.708	0.36584
0.78332	31.48	31.7548	0.364904
0.78336	34.36	31.8015	0.363969
0.7834	29.81	31.8483	0.363035
0.78344	34.64	31.895	0.3621
0.78348	29.23	31.9417	0.361166
0.78352	34.83	31.9884	0.360233
0.78356	28.23	32.035	0.359299
0.7836	33.73	32.0817	0.358366
0.78364	28.95	32.1283	0.357434
0.78368	34.02	32.1749	0.356501
0.78372	29.33	32.2216	0.355569
0.78376	34.12	32.2682	0.354637
0.7838	29.47	32.3147	0.353705
0.78384	33.49	32.3613	0.352774
0.78388	30.14	32.4079	0.351842
0.78392	33.59	32.4544	0.350912
0.78396	30.53	32.5009	0.349981
0.784	34.55	32.5474	0.349051
0.78404	30.91	32.5939	0.348122
0.78408	34.74	32.6404	0.347193
0.78412	31.63	32.6868	0.346264
0.78416	34.93	32.7332	0.345336
0.7842	32.54	32.7796	0.344409
0.78424	34.02	32.8259	0.343482
0.78428	33.83	32.8722	0.342555
0.78432	33.11	32.9185	0.34163
0.78436	35.03	32.9648	0.340705
0.7844	32.06	33.011	0.33978
0.78444	35.46	33.0572	0.338856
0.78448	30.96	33.1033	0.337933
0.78452	35.55	33.1495	0.33701
0.78456	30.38	33.1956	0.336088
0.7846	35.74	33.2417	0.335167
0.78464	30.05	33.2877	0.334246
0.78468	35.36	33.3338	0.333325
0.78472	30.34	33.3798	0.332405
0.78476	34.88	33.4258	0.331485
0.7848	30.19	33.4717	0.330566
0.78484	34.93	33.5177	0.329647
0.78488	30.91	33.5636	0.328729
0.78492	34.98	33.6095	0.327811
0.78496	31.2	33.6553	0.326893
0.785	34.93	33.7012	0.325977
0.78504	32.15	33.747	0.32506
0.78508	35.55	33.7928	0.324145
0.78512	32.39	33.8385	0.32323
0.78516	36.08	33.8842	0.322315
0.7852	33.02	33.9299	0.321402
0.78524	35.89	33.9756	0.320489
0.78528	34.12	34.0212	0.319577
0.78532	35.74	34.0667	0.318665
0.78536	35.07	34.1123	0.317755
0.7854	34.12	34.1578	0.316845
0.78544	35.98	34.2032	0.315936
0.78548	32.97	34.2486	0.315028
0.78552	36.94	34.294	0.31412
0.78556	32.58	34.3393	0.313213
0.7856	37.32	34.3846	0.312307
0.78564	31.48	34.4299	0.311402
0.78568	37.18	34.4752	0.310497
0.78572	31.53	34.5204	0.309593
0.78576	36.56	34.5655	0.308689
0.7858	31.15	34.6107	0.307786
0.78584	36.08	34.6558	0.306884
0.78588	31.48	34.7009	0.305982
0.78592	36.03	34.746	0.30508
0.78596	32.25	34.791	0.304179
0.786	35.98	34.8361	0.303279
0.78604	33.06	34.8811	0.302379
0.78608	36.41	34.926	0.30148
0.78612	33.02	34.971	0.300581
0.78616	36.7	35.0159	0.299683
0.7862	33.88	35.0607	0.298785
0.78624	37.37	35.1056	0.297888
0.78628	34.36	35.1504	0.296992
0.78632	37.04	35.1952	0.296096
0.78636	35.6	35.2399	0.295201
0.7864	36.22	35.2846	0.294307
0.78644	36.84	35.3293	0.293414
0.78648	35.36	35.374	0.292521
0.78652	37.66	35.4186	0.291628
0.78656	33.54	35.4632	0.290737
0.7866	37.85	35.5077	0.289845
0.78664	33.25	35.5523	0.288955
0.78668	37.75	35.5968	0.288065
0.78672	33.21	35.6412	0.287175
0.78676	37.71	35.6857	0.286286
0.7868	32.11	35.7302	0.285397
0.78684	37.99	35.7746	0.284509
0.78688	32.87	35.819	0.28362
0.78692	37.47	35.8634	0.282733
0.78696	33.25	35.9077	0.281845
0.787	36.89	35.9521	0.280958
0.78704	32.92	35.9964	0.280071
0.78708	37.52	36.0408	0.279185
0.78712	33.73	36.0851	0.278298
0.78716	37.71	36.1294	0.277412
0.7872	34.21	36.1737	0.276527
0.78724	37.9	36.2179	0.275642
0.78728	34.93	36.2622	0.274757
0.78732	38.81	36.3064	0.273872
0.78736	36.13	36.3506	0.272988
0.7874	37.75	36.3948	0.272105
0.78744	36.61	36.4389	0.271221
0.78748	37.28	36.4831	0.270339
0.78752	37.8	36.5272	0.269457
0.78756	36.13	36.5713	0.268575
0.7876	39	36.6153	0.267693
0.78764	35.03	36.6594	0.266812
0.78768	39.29	36.7034	0.265932
0.78772	33.97	36.7474	0.265051
0.78776	39.48	36.7914	0.264171
0.7878	34.21	36.8354	0.263292
0.78784	39.29	36.8794	0.262412
0.78788	33.69	36.9234	0.261533
0.78792	38.23	36.9673	0.260654
0.78796	33.64	37.0113	0.259775
0.788	38.52	37.0552	0.258896
0.78804	34.4	37.0991	0.258017
0.78808	38.47	37.1431	0.257139
0.78812	34.69	37.187	0.25626
0.78816	38.42	37.2309	0.255382
0.7882	35.31	37.2748	0.254504
0.78824	39.29	37.3187	0.253626
0.78828	35.46	37.3626	0.252748
0.78832	39.57	37.4065	0.25187
0.78836	35.74	37.4503	0.250993
0.7884	39.24	37.4942	0.250116
0.78844	37.23	37.538	0.249239
0.78848	39.19	37.5819	0.248363
0.78852	37.75	37.6257	0.247486
0.78856	38.71	37.6695	0.24661
0.7886	38.76	37.7133	0.245735
0.78864	37.23	37.757	0.244859
0.78868	40.15	37.8008	0.243984
0.78872	36.56	37.8445	0.243109
0.78876	40.29	37.8883	0.242235
0.7888	35.79	37.932	0.24136
0.78884	40.48	37.9757	0.240486
0.78888	34.69	38.0194	0.239611
0.78892	40.53	38.0631	0.238737
0.78896	34.6	38.1068	0.237863
0.789	39.81	38.1505	0.236989
0.78904	34.6	38.1942	0.236115
0.78908	39.76	38.238	0.235241
0.78912	35.7	38.2817	0.234367
0.78916	39.48	38.3254	0.233493
0.7892	35.6	38.3691	0.232619
0.78924	39.57	38.4128	0.231745
0.78928	36.75	38.4565	0.230871
0.78932	40.1	38.5002	0.229997
0.78936	36.17	38.5439	0.229123
0.7894	40.48	38.5876	0.228249
0.78944	37.47	38.6312	0.227375
0.78948	41.06	38.6749	0.226502
0.78952	37.28	38.7186	0.225628
0.78956	40.63	38.7622	0.224755
0.7896	38.81	38.8059	0.223882
0.78964	40.24	38.8495	0.22301
0.78968	40.34	38.8931	0.222137
0.78972	38.86	38.9367	0.221265
0.78976	40.29	38.9803	0.220393
0.7898	37.75	39.0239	0.219522
0.78984	41.63	39.0675	0.21865
0.78988	36.75	39.1111	0.217779
0.78992	41.82	39.1546	0.216907
0.78996	35.55	39.1982	0.216036
0.79	41.39	39.2417	0.215165
0.79004	35.79	39.2853	0.214295
0.79008	41.44	39.3288	0.213424
0.79012	35.74	39.3723	0.212553
0.79016	40.53	39.4159	0.211682
0.7902	36.51	39.4594	0.210812
0.79024	40.87	39.5029	0.209941
0.79028	37.32	39.5464	0.209071
0.79032	40.53	39.59	0.208201
0.79036	37.71	39.6335	0.207331
0.7904	41.11	39.677	0.206461
0.79044	37.61	39.7204	0.205591
0.79048	41.54	39.7639	0.204722
0.79052	38.66	39.8074	0.203853
0.79056	41.63	39.8508	0.202984
0.7906	38.86	39.8942	0.202116
0.79064	42.11	39.9376	0.201248
0.79068	40.1	39.9809	0.200381
0.79072	41.15	40.0243	0.199514
0.79076	41.34	40.0676	0.198648
0.7908	40.39	40.1109	0.197782
0.79084	42.45	40.1541	0.196917
0.79088	39.19	40.1974	0.196053
0.79092	43.35	40.2406	0.195189
0.79096	38.09	40.2837	0.194325
0.791	42.83	40.3269	0.193462
0.79104	36.75	40.37	0.192599
0.79108	42.3	40.4131	0.191737
0.79112	37.42	40.4562	0.190875
0.79116	42.59	40.4993	0.190014
0.7912	37.52	40.5423	0.189153
0.79124	42.06	40.5854	0.188293
0.79128	38.33	40.6284	0.187433
0.79132	42.01	40.6714	0.186573
0.79136	38.14	40.7143	0.185713
0.7914	42.06	40.7573	0.184855
0.79144	38.9	40.8002	0.183996
0.79148	42.49	40.8431	0.183138
0.79152	38.9	40.886	0.18228
0.79156	42.54	40.9288	0.181423
0.7916	39.33	40.9717	0.180567
0.79164	42.88	41.0145	0.179711
0.79168	40.15	41.0572	0.178856
0.79172	42.97	41.1	0.178001
0.79176	41.49	41.1427	0.177147
0.7918	42.78	41.1853	0.176293
0.79184	42.49	41.228	0.17544
0.79188	41.11	41.2706	0.174588
0.79192	43.07	41.3132	0.173736
0.79196	39.72	41.3557	0.172885
0.792	43.69	41.3983	0.172035
0.79204	38.86	41.4408	0.171185
0.79208	44.6	41.4832	0.170335
0.79212	38.52	41.5257	0.169487
0.79216	44.17	41.5681	0.168638
0.7922	37.95	41.6105	0.16779
0.79224	44.03	41.6529	0.166943
0.79228	38.42	41.6952	0.166096
0.79232	43.4	41.7375	0.165249
0.79236	39.09	41.7798	0.164403
0.7924	43.07	41.8221	0.163557
0.79244	38.95	41.8644	0.162712
0.79248	43.12	41.9066	0.161867
0.79252	39.38	41.9489	0.161022
0.79256	43.12	41.9911	0.160178
0.7926	40.67	42.0333	0.159335
0.79264	43.55	42.0754	0.158492
0.79268	40.82	42.1175	0.157649
0.79272	43.55	42.1596	0.156807
0.79276	41.73	42.2017	0.155966
0.7928	44.55	42.2437	0.155125
0.79284	42.01	42.2858	0.154285
0.79288	43.45	42.3277	0.153446
0.79292	42.83	42.3697	0.152607
0.79296	41.97	42.4116	0.151769
0.793	44.41	42.4534	0.150931
0.79304	41.3	42.4953	0.150094
0.79308	45.37	42.5371	0.149258
0.79312	40.63	42.5789	0.148423
0.79316	45.32	42.6206	0.147588
0.7932	40.2	42.6623	0.146754
0.79324	44.65	42.704	0.14592
0.79328	39.48	42.7456	0.145087
0.79332	44.84	42.7872	0.144255
0.79336	39.72	42.8288	0.143423
0.7934	44.65	42.8704	0.142592
0.79344	39.81	42.9119	0.141761
0.79348	44.31	42.9535	0.140931
0.79352	40.72	42.9949	0.140101
0.79356	44.07	43.0364	0.139272
0.7936	41.39	43.0778	0.138443
0.79364	45.32	43.1192	0.137615
0.79368	41.73	43.1606	0.136788
0.79372	44.98	43.2019	0.135961
0.79376	41.82	43.2432	0.135135
0.7938	45.89	43.2845	0.13431
0.79384	42.97	43.3257	0.133485
0.79388	45.32	43.3669	0.132661
0.79392	43.59	43.4081	0.131838
0.79396	43.88	43.4492	0.131015
0.794	44.26	43.4903	0.130193
0.79404	43.69	43.5314	0.129372
0.79408	45.75	43.5724	0.128551
0.79412	41.92	43.6134	0.127731
0.79416	45.8	43.6544	0.126912
0.7942	41.44	43.6954	0.126093
0.79424	46.32	43.7363	0.125274
0.79428	40.82	43.7772	0.124456
0.79432	46.18	43.8181	0.123639
0.79436	40.15	43.8589	0.122821
0.7944	45.94	43.8998	0.122004
0.79444	40.29	43.9406	0.121188
0.79448	45.6	43.9814	0.120371
0.79452	41.15	44.0222	0.119555
0.79456	45.7	44.063	0.11874
0.7946	41.87	44.1038	0.117924
0.79464	45.41	44.1445	0.117109
0.79468	42.54	44.1853	0.116294
0.79472	45.84	44.226	0.11548
0.79476	42.59	44.2667	0.114666
0.7948	46.13	44.3074	0.113852
0.79484	42.49	44.3481	0.113038
0.79488	46.51	44.3888	0.112225
0.79492	43.88	44.4294	0.111412
0.79496	46.51	44.47	0.110599
0.795	44.84	44.5106	0.109787
0.79504	45.03	44.5512	0.108976
0.79508	45.51	44.5918	0.108164
0.79512	43.93	44.6324	0.107353
0.79516	47.04	44.6729	0.106542
0.7952	43.4	44.7134	0.105731
0.79524	47.52	44.7539	0.104921
0.79528	42.21	44.7945	0.104111
0.79532	47.71	44.835	0.103301
0.79536	42.4	44.8754	0.102491
0.7954	47.23	44.9159	0.101681
0.79544	41.92	44.9564	0.100872
0.79548	46.32	44.9969	0.100062
0.79552	41.87	45.0374	0.0992522
0.79556	46.61	45.0779	0.0984424
0.7956	42.45	45.1184	0.0976325
0.79564	46.51	45.1589	0.0968225
0.79568	42.4	45.1994	0.0960123
0.79572	46.85	45.2399	0.0952021
0.79576	42.88	45.2804	0.0943918
0.7958	46.61	45.3209	0.0935813
0.79584	43.74	45.3615	0.0927708
0.79588	47.85	45.402	0.0919601
0.79592	44.98	45.4425	0.0911494
0.79596	47.52	45.4831	0.0903386
0.796	44.98	45.5236	0.0895277
0.79604	47.28	45.5642	0.0887167
0.79608	46.13	45.6047	0.0879056
0.79612	45.41	45.6453	0.0870944
0.79616	47.23	45.6859	0.086283
0.7962	45.27	45.7264	0.0854714
0.79624	48.05	45.767	0.0846596
0.79628	44.22	45.8076	0.0838475
0.79632	48.29	45.8482	0.0830352
0.79636	43.35	45.8889	0.0822225
0.7964	48.48	45.9295	0.0814094
0.79644	43.07	45.9702	0.0805958
0.79648	47.95	46.0109	0.0797817
0.79652	42.11	46.0516	0.0789671
0.79656	47.76	46.0924	0.0781519
0.7966	42.54	46.1332	0.0773361
0.79664	48.09	46.174	0.0765197
0.79668	43.31	46.2149	0.0757026
0.79672	46.71	46.2558	0.0748848
0.79676	43.21	46.2967	0.0740664
0.7968	47.76	46.3376	0.0732473
0.79684	44.07	46.3786	0.0724275
0.79688	47.9	46.4196	0.0716071
0.79692	44.5	46.4607	0.0707862
0.79696	48.24	46.5018	0.0699646
0.797	44.46	46.5429	0.0691425
0.79704	48.67	46.584	0.0683198
0.79708	46.08	46.6252	0.0674967
0.79712	48.09	46.6663	0.066673
0.79716	46.56	46.7076	0.065849
0.7972	47.18	46.7488	0.0650245
0.79724	48.33	46.79	0.0641995
0.79728	46.85	46.8313	0.0633742
0.79732	48.48	46.8726	0.0625485
0.79736	45.17	46.9139	0.0617223
0.7974	50.44	46.9552	0.0608957
0.79744	44.7	46.9966	0.0600687
0.79748	50.1	47.0379	0.0592413
0.79752	44.12	47.0793	0.0584134
0.79756	49.19	47.1207	0.057585
0.7976	44.17	47.1622	0.0567561
0.79764	48.62	47.2037	0.0559267
0.79768	43.98	47.2452	0.0550968
0.79772	48.43	47.2867	0.0542663
0.79776	44.31	47.3282	0.0534353
0.7978	48.57	47.3698	0.0526037
0.79784	45.32	47.4114	0.0517717
0.79788	48.96	47.453	0.0509392
0.79792	45.51	47.4947	0.0501063
0.79796	49.58	47.5364	0.0492729
0.798	45.89	47.578	0.0484391
0.79804	49.34	47.6198	0.047605
0.79808	46.71	47.6615	0.0467705
0.79812	49.15	47.7032	0.0459358
0.79816	46.85	47.745	0.0451007
0.7982	49.05	47.7867	0.0442654
0.79824	47.9	47.8285	0.0434298
0.79828	49.43	47.8703	0.0425941
0.79832	49.34	47.9121	0.0417581
0.79836	47.85	47.9539	0.0409219
0.7984	49.67	47.9957	0.0400855
0.79844	46.85	48.0376	0.0392488
0.79848	51.11	48.0794	0.0384119
0.79852	45.51	48.1213	0.0375748
0.79856	51.4	48.1631	0.0367374
0.7986	44.6	48.205	0.0358996
0.79864	50.73	48.2469	0.0350615
0.79868	44.07	48.2888	0.0342231
0.79872	49.77	48.3308	0.0333842
0.79876	45.13	48.3728	0.032545
0.7988	50.54	48.4147	0.0317053
0.79884	45.13	48.4567	0.0308653
0.79888	49.72	48.4988	0.0300248
0.79892	45.46	48.5408	0.029184
0.79896	49.58	48.5829	0.0283429
0.799	46.47	48.6249	0.0275015
0.79904	50.01	48.667	0.0266597
0.79908	46.85	48.7091	0.0258178
0.79912	50.87	48.7512	0.0249756
0.79916	47.9	48.7933	0.0241333
0.7992	50.97	48.8355	0.0232909
0.79924	48.62	48.8776	0.0224485
0.79928	50.3	48.9197	0.021606
0.79932	50.63	48.9618	0.0207635
0.79936	49.67	49.004	0.019921
0.7994	50.25	49.0461	0.0190785
0.79944	48.91	49.0882	0.018236
0.79948	50.87	49.1303	0.0173935
0.79952	47.9	49.1724	0.0165511
0.79956	51.21	49.2146	0.0157086
0.7996	46.37	49.2567	0.014866
0.79964	50.87	49.2988	0.0140234
0.79968	46.51	49.341	0.0131807
0.79972	51.21	49.3831	0.012338
0.79976	45.65	49.4252	0.0114951
0.7998	50.87	49.4674	0.0106522
0.79984	46.47	49.5095	0.00980913
0.79988	50.97	49.5517	0.00896604
0.79992	47.42	49.5939	0.00812292
0.79996	50.25	49.636	0.00727979
0.8	46.8	49.6782	0.00643668
0.80004	50.68	49.7203	0.00559364
0.80008	47.62	49.7625	0.00475071
0.80012	51.25	49.8046	0.00390795
0.80016	48.81	49.8467	0.00306543
0.8002	52.02	49.8888	0.00222319
0.80024	49.15	49.9309	0.00138129
0.80028	52.4	49.973	0.000539797
0.80032	50.25	50.0151	-0.000301258
0.80036	52.31	50.0571	-0.00114183
0.8004	49.96	50.0991	-0.0019819
0.80044	51.01	50.1411	-0.00282144
0.80048	51.16	50.183	-0.00366044
0.80052	50.1	50.2249	-0.0044989
0.80056	52.88	50.2668	-0.00533681
0.8006	48.72	50.3087	-0.00617417
0.80064	52.83	50.3506	-0.007011
0.80068	47.71	50.3924	-0.00784732
0.80072	53.45	50.4342	-0.00868313
0.80076	46.94	50.4759	-0.00951846
0.8008	52.64	50.5177	-0.0103533
0.80084	47.42	50.5594	-0.0111877
0.80088	52.64	50.6011	-0.0120217
0.80092	47.23	50.6428	-0.0128552
0.80096	51.68	50.6844	-0.0136882
0.801	47.62	50.726	-0.0145209
0.80104	51.54	50.7676	-0.015353
0.80108	48.19	50.8092	-0.0161846
0.80112	52.16	50.8508	-0.0170157
0.80116	48.57	50.8923	-0.0178462
0.8012	53.22	50.9338	-0.0186761
0.80124	49.34	50.9753	-0.0195054
0.80128	52.98	51.0167	-0.0203339
0.80132	50.06	51.0581	-0.0211616
0.80136	53.02	51.0994	-0.0219886
0.8014	50.92	51.1407	-0.0228147
0.80144	53.36	51.182	-0.0236399
0.80148	51.4	51.2232	-0.0244642
0.80152	52.55	51.2644	-0.0252877
0.80156	53.12	51.3055	-0.0261101
0.8016	50.97	51.3466	-0.0269317
0.80164	53.93	51.3876	-0.0277523
0.80168	49.91	51.4286	-0.0285721
0.80172	54.51	51.4695	-0.0293909
0.80176	48.91	51.5104	-0.0302089
0.8018	54.46	51.5513	-0.031026
0.80184	48.48	51.5921	-0.0318424
0.80188	53.84	51.6329	-0.032658
0.80192	48.33	51.6736	-0.0334728
0.80196	53.12	51.7143	-0.034287
0.802	48.33	51.755	-0.0351004
0.80204	53.12	51.7957	-0.0359132
0.80208	49.53	51.8363	-0.0367253
0.80212	53.22	51.8768	-0.0375367
0.80216	49.48	51.9174	-0.0383475
0.8022	53.26	51.9579	-0.0391575
0.80224	49.48	51.9983	-0.0399668
0.80228	53.84	52.0388	-0.0407755
0.80232	49.96	52.0792	-0.0415833
0.80236	53.84	52.1195	-0.0423904
0.8024	51.06	52.1598	-0.0431967
0.80244	54.41	52.2001	-0.0440021
0.80248	51.83	52.2403	-0.0448067
0.80252	53.65	52.2805	-0.0456104
0.80256	51.88	52.3207	-0.0464132
0.8026	52.88	52.3608	-0.0472152
0.80264	53.84	52.4008	-0.0480162
0.80268	52.26	52.4408	-0.0488164
0.80272	55.03	52.4808	-0.0496156
0.80276	51.49	52.5207	-0.050414
0.8028	55.37	52.5606	-0.0512115
0.80284	49.63	52.6004	-0.0520082
0.80288	55.18	52.6402	-0.0528041
0.80292	50.01	52.68	-0.0535991
0.80296	55.08	52.7197	-0.0543935
0.803	49.86	52.7594	-0.0551871
0.80304	54.8	52.799	-0.0559799
0.80308	49.05	52.8386	-0.0567722
0.80312	54.36	52.8782	-0.0575637
0.80316	49.91	52.9177	-0.0583545
0.8032	54.27	52.9572	-0.0591448
0.80324	50.77	52.9967	-0.0599343
0.80328	54.17	53.0362	-0.0607231
0.80332	50.73	53.0756	-0.0615113
0.80336	55.32	53.1149	-0.0622987
0.8034	51.68	53.1543	-0.0630855
0.80344	55.32	53.1936	-0.0638714
0.80348	51.73	53.2328	-0.0646566
0.80352	54.94	53.272	-0.0654409
0.80356	52.26	53.3112	-0.0662245
0.8036	54.84	53.3504	-0.0670072
0.80364	54.13	53.3895	-0.0677891
0.80368	54.8	53.4285	-0.0685702
0.80372	55.08	53.4675	-0.0693504
0.80376	52.59	53.5065	-0.0701298
0.8038	55.66	53.5454	-0.0709084
0.80384	52.11	53.5843	-0.0716863
0.80388	56.33	53.6232	-0.0724633
0.80392	51.64	53.662	-0.0732397
0.80396	55.85	53.7008	-0.0740153
0.804	50.58	53.7395	-0.0747903
0.80404	55.56	53.7782	-0.0755647
0.80408	51.01	53.8169	-0.0763385
0.80412	55.75	53.8556	-0.0771117
0.80416	51.16	53.8942	-0.0778844
0.8042	55.13	53.9328	-0.0786566
0.80424	51.01	53.9714	-0.0794282
0.80428	54.89	54.01	-0.0801994
0.80432	51.68	54.0485	-0.08097
0.80436	55.13	54.087	-0.0817401
0.8044	51.97	54.1255	-0.0825097
0.80444	56.09	54.1639	-0.0832788
0.80448	52.5	54.2024	-0.0840473
0.80452	55.8	54.2408	-0.0848152
0.80456	52.88	54.2791	-0.0855825
0.8046	56.61	54.3175	-0.0863492
0.80464	53.69	54.3558	-0.0871152
0.80468	55.9	54.394	-0.0878805
0.80472	54.56	54.4323	-0.0886452
0.80476	55.13	54.4705	-0.0894092
0.8048	55.9	54.5086	-0.0901725
0.80484	53.55	54.5468	-0.0909352
0.80488	56.61	54.5849	-0.0916972
0.80492	53.22	54.6229	-0.0924585
0.80496	57.33	54.661	-0.0932192
0.805	52.31	54.699	-0.0939794
0.80504	58.15	54.7369	-0.0947389
0.80508	51.16	54.7749	-0.0954979
0.80512	56.81	54.8128	-0.0962563
0.80516	51.97	54.8507	-0.0970142
0.8052	56.9	54.8886	-0.0977717
0.80524	51.68	54.9264	-0.0985286
0.80528	56.57	54.9643	-0.0992852
0.80532	52.45	55.0021	-0.100041
0.80536	56.52	55.0398	-0.100797
0.8054	52.59	55.0776	-0.101552
0.80544	56.18	55.1153	-0.102307
0.80548	52.98	55.153	-0.103061
0.80552	57.09	55.1907	-0.103815
0.80556	54.03	55.2284	-0.104568
0.8056	56.71	55.266	-0.10532
0.80564	54.51	55.3036	-0.106073
0.80568	57.19	55.3412	-0.106824
0.80572	54.46	55.3788	-0.107575
0.80576	56.81	55.4163	-0.108325
0.8058	55.66	55.4538	-0.109075
0.80584	56.23	55.4912	-0.109824
0.80588	56.76	55.5287	-0.110573
0.80592	55.23	55.5661	-0.111321
0.80596	58	55.6034	-0.112069
0.806	53.45	55.6408	-0.112815
0.80604	58.67	55.6781	-0.113562
0.80608	52.69	55.7154	-0.114308
0.80612	58.53	55.7527	-0.115053
0.80616	52.93	55.7899	-0.115798
0.8062	57.33	55.8271	-0.116543
0.80624	53.12	55.8644	-0.117287
0.80628	57.67	55.9016	-0.118031
0.80632	53.02	55.9387	-0.118775
0.80636	56.33	55.9759	-0.119518
0.8064	53.65	56.013	-0.120261
0.80644	56.42	56.0502	-0.121003
0.80648	53.12	56.0873	-0.121745
0.80652	57.57	56.1244	-0.122487
0.80656	54.65	56.1614	-0.123229
0.8066	57.72	56.1985	-0.12397
0.80664	53.89	56.2355	-0.12471
0.80668	58.86	56.2725	-0.12545
0.80672	55.23	56.3095	-0.126189
0.80676	59.29	56.3464	-0.126928
0.8068	55.8	56.3833	-0.127667
0.80684	57.52	56.4202	-0.128404
0.80688	57.52	56.4571	-0.129141
0.80692	56.76	56.4939	-0.129878
0.80696	58.39	56.5307	-0.130613
0.807	55.94	56.5674	-0.131348
0.80704	58.48	56.6041	-0.132083
0.80708	54.75	56.6408	-0.132817
0.80712	58.96	56.6775	-0.13355
0.80716	54.36	56.7141	-0.134283
0.8072	58.58	56.7507	-0.135015
0.80724	54.22	56.7873	-0.135746
0.80728	59.29	56.8239	-0.136477
0.80732	52.64	56.8604	-0.137208
0.80736	59.01	56.8969	-0.137938
0.8074	53.84	56.9334	-0.138668
0.80744	58.39	56.9699	-0.139397
0.80748	54.41	57.0063	-0.140126
0.80752	57.95	57.0427	-0.140854
0.80756	54.89	57.0791	-0.141582
0.8076	58.39	57.1155	-0.142309
0.80764	55.18	57.1518	-0.143036
0.80768	59.63	57.1881	-0.143762
0.80772	55.56	57.2244	-0.144487
0.80776	59.44	57.2606	-0.145212
0.8078	56.81	57.2968	-0.145936
0.80784	59.2	57.333	-0.146659
0.80788	57	57.3691	-0.147382
0.80792	58.86	57.4052	-0.148104
0.80796	57.19	57.4413	-0.148825
0.808	58.05	57.4773	-0.149546
0.80804	59.06	57.5133	-0.150266
0.80808	56.81	57.5492	-0.150985
0.80812	60.06	57.5851	-0.151703
0.80816	55.66	57.621	-0.152421
0.8082	59.82	57.6569	-0.153137
0.80824	55.61	57.6927	-0.153854
0.80828	60.68	57.7285	-0.154569
0.80832	55.61	57.7642	-0.155284
0.80836	60.59	57.7999	-0.155999
0.8084	54.27	57.8356	-0.156713
0.80844	59.53	57.8713	-0.157426
0.80848	54.7	57.907	-0.158139
0.80852	59.44	57.9426	-0.158852
0.80856	54.89	57.9782	-0.159564
0.8086	58.86	58.0138	-0.160276
0.80864	55.42	58.0493	-0.160987
0.80868	58.82	58.0849	-0.161697
0.80872	55.37	58.1204	-0.162408
0.80876	60.01	58.1559	-0.163117
0.8088	56.81	58.1913	-0.163827
0.80884	60.25	58.2268	-0.164535
0.80888	57.14	58.2622	-0.165243
0.80892	59.87	58.2975	-0.165951
0.80896	57.95	58.3329	-0.166658
0.809	59.96	58.3682	-0.167364
0.80904	59.01	58.4035	-0.16807
0.80908	58.67	58.4387	-0.168774
0.80912	60.44	58.4739	-0.169479
0.80916	57.24	58.5091	-0.170182
0.8092	60.83	58.5443	-0.170885
0.80924	57.19	58.5794	-0.171587
0.80928	60.16	58.6144	-0.172289
0.80932	55.85	58.6495	-0.17299
0.80936	60.4	58.6845	-0.17369
0.8094	55.32	58.7195	-0.17439
0.80944	61.35	58.7545	-0.175089
0.80948	54.41	58.7894	-0.175788
0.80952	61.02	58.8243	-0.176486
0.80956	54.6	58.8592	-0.177183
0.8096	59.92	58.894	-0.17788
0.80964	56.71	58.9288	-0.178577
0.80968	60.63	58.9636	-0.179272
0.80972	57.57	58.9983	-0.179967
0.80976	60.68	59.033	-0.180661
0.8098	57.48	59.0677	-0.181354
0.80984	61.02	59.1023	-0.182046
0.80988	57.91	59.1369	-0.182738
0.80992	61.35	59.1714	-0.183428
0.80996	57.91	59.2059	-0.184118
0.81	61.98	59.2403	-0.184807
0.81004	59.06	59.2747	-0.185494
0.81008	60.54	59.309	-0.186181
0.81012	59.39	59.3433	-0.186866
0.81016	60.3	59.3775	-0.18755
0.8102	61.07	59.4117	-0.188234
0.81024	57.95	59.4458	-0.188916
0.81028	62.07	59.4799	-0.189597
0.81032	58.34	59.5139	-0.190277
0.81036	62.55	59.5478	-0.190956
0.8104	57.38	59.5817	-0.191634
0.81044	62.21	59.6156	-0.192311
0.81048	56.71	59.6494	-0.192987
0.81052	62.5	59.6831	-0.193663
0.81056	55.8	59.7168	-0.194337
0.8106	61.83	59.7505	-0.19501
0.81064	55.85	59.7841	-0.195683
0.81068	61.35	59.8177	-0.196355
0.81072	57.62	59.8513	-0.197025
0.81076	61.31	59.8848	-0.197695
0.8108	57.38	59.9182	-0.198365
0.81084	61.64	59.9517	-0.199033
0.81088	57.62	59.985	-0.199701
0.81092	61.88	60.0184	-0.200367
0.81096	58.24	60.0516	-0.201033
0.811	61.88	60.0849	-0.201698
0.81104	58.86	60.1181	-0.202362
0.81108	62.5	60.1512	-0.203025
0.81112	60.01	60.1843	-0.203687
0.81116	61.45	60.2174	-0.204348
0.8112	60.44	60.2504	-0.205008
0.81124	61.02	60.2833	-0.205667
0.81128	62.45	60.3163	-0.206325
0.81132	60.2	60.3491	-0.206982
0.81136	62.93	60.3819	-0.207639
0.8114	58.91	60.4147	-0.208294
0.81144	63.41	60.4474	-0.208949
0.81148	58.29	60.4801	-0.209603
0.81152	63.36	60.5128	-0.210256
0.81156	57.24	60.5454	-0.210908
0.8116	63.08	60.578	-0.21156
0.81164	56.71	60.6106	-0.212211
0.81168	62.31	60.6431	-0.212862
0.81172	57.67	60.6756	-0.213512
0.81176	62.07	60.7081	-0.214162
0.8118	58.19	60.7406	-0.214811
0.81184	61.98	60.773	-0.21546
0.81188	58.58	60.8054	-0.216108
0.81192	62.41	60.8378	-0.216756
0.81196	58.96	60.8702	-0.217404
0.812	61.64	60.9026	-0.218052
0.81204	58.82	60.9349	-0.218699
0.81208	63.84	60.9673	-0.219345
0.81212	59.58	60.9996	-0.219991
0.81216	62.93	61.0319	-0.220637
0.8122	60.78	61.0641	-0.221283
0.81224	62.45	61.0964	-0.221928
0.81228	62.02	61.1286	-0.222573
0.81232	61.78	61.1609	-0.223217
0.81236	62.93	61.1931	-0.223861
0.8124	60.73	61.2253	-0.224505
0.81244	63.41	61.2575	-0.225149
0.81248	59.53	61.2896	-0.225793
0.81252	63.41	61.3218	-0.226436
0.81256	58.62	61.354	-0.227079
0.8126	64.08	61.3861	-0.227723
0.81264	57.62	61.4183	-0.228366
0.81268	63.51	61.4505	-0.22901
0.81272	57.91	61.4827	-0.229653
0.81276	63.08	61.5149	-0.230297
0.8128	58.86	61.5471	-0.230941
0.81284	62.6	61.5793	-0.231585
0.81288	58.86	61.6115	-0.23223
0.81292	62.5	61.6437	-0.232875
0.81296	58.96	61.676	-0.23352
0.813	63.89	61.7083	-0.234165
0.81304	59.29	61.7405	-0.234811
0.81308	63.65	61.7728	-0.235457
0.81312	59.92	61.8051	-0.236103
0.81316	63.84	61.8374	-0.236749
0.8132	61.21	61.8698	-0.237395
0.81324	63.7	61.9021	-0.238042
0.81328	62.26	61.9345	-0.238689
0.81332	63.51	61.9668	-0.239336
0.81336	62.17	61.9992	-0.239984
0.8134	62.79	62.0316	-0.240631
0.81344	63.51	62.064	-0.241279
0.81348	61.11	62.0964	-0.241927
0.81352	63.99	62.1288	-0.242576
0.81356	60.01	62.1612	-0.243225
0.8136	64.51	62.1937	-0.243874
0.81364	59.1	62.2262	-0.244523
0.81368	65.18	62.2587	-0.245174
0.81372	59.34	62.2912	-0.245824
0.81376	63.84	62.3238	-0.246475
0.8138	59.15	62.3564	-0.247127
0.81384	63.89	62.389	-0.24778
0.81388	59.44	62.4216	-0.248433
0.81392	64.13	62.4543	-0.249086
0.81396	59.25	62.487	-0.24974
0.814	63.65	62.5198	-0.250395
0.81404	60.35	62.5525	-0.251051
0.81408	64.18	62.5854	-0.251707
0.81412	60.73	62.6182	-0.252364
0.81416	64.08	62.6511	-0.253021
0.8142	60.73	62.6839	-0.253679
0.81424	64.8	62.7169	-0.254337
0.81428	61.93	62.7498	-0.254996
0.81432	64.46	62.7828	-0.255656
0.81436	62.79	62.8158	-0.256316
0.8144	64.51	62.8488	-0.256976
0.81444	63.79	62.8818	-0.257637
0.81448	62.84	62.9149	-0.258298
0.81452	65.23	62.948	-0.25896
0.81456	62.6	62.9811	-0.259622
0.8146	65.61	63.0143	-0.260285
0.81464	61.07	63.0474	-0.260949
0.81468	65.76	63.0806	-0.261613
0.81472	60.73	63.1139	-0.262277
0.81476	65.28	63.1471	-0.262943
0.8148	59.2	63.1804	-0.263609
0.81484	65.28	63.2138	-0.264276
0.81488	59.73	63.2472	-0.264943
0.81492	64.51	63.2806	-0.265612
0.81496	60.4	63.3141	-0.266281
0.815	64.7	63.3476	-0.266951
0.81504	60.3	63.3811	-0.267622
0.81508	64.9	63.4147	-0.268294
0.81512	60.54	63.4483	-0.268967
0.81516	64.8	63.482	-0.26964
0.8152	61.59	63.5157	-0.270315
0.81524	65.37	63.5495	-0.27099
0.81528	61.78	63.5833	-0.271666
0.81532	65.61	63.6171	-0.272342
0.81536	62.88	63.651	-0.27302
0.8154	64.85	63.6849	-0.273698
0.81544	63.6	63.7188	-0.274376
0.81548	64.8	63.7528	-0.275056
0.81552	64.61	63.7868	-0.275735
0.81556	64.27	63.8208	-0.276416
0.8156	65.9	63.8548	-0.277097
0.81564	62.79	63.8889	-0.277779
0.81568	65.66	63.9231	-0.278461
0.81572	62.12	63.9572	-0.279144
0.81576	66.28	63.9914	-0.279828
0.8158	61.88	64.0256	-0.280512
0.81584	66.57	64.0598	-0.281197
0.81588	60.68	64.0941	-0.281883
0.81592	66.57	64.1285	-0.282569
0.81596	60.63	64.1628	-0.283256
0.816	65.76	64.1972	-0.283944
0.81604	61.5	64.2316	-0.284633
0.81608	65.04	64.2661	-0.285322
0.81612	60.2	64.3006	-0.286012
0.81616	65.95	64.3352	-0.286703
0.8162	61.16	64.3697	-0.287395
0.81624	66.09	64.4043	-0.288087
0.81628	62.84	64.439	-0.288779
0.81632	65.9	64.4736	-0.289473
0.81636	63.6	64.5083	-0.290167
0.8164	65.28	64.543	-0.290861
0.81644	63.79	64.5778	-0.291556
0.81648	66.67	64.6125	-0.292251
0.81652	64.37	64.6473	-0.292946
0.81656	65.61	64.6821	-0.293642
0.8166	64.32	64.7169	-0.294338
0.81664	65.57	64.7517	-0.295034
0.81668	67.38	64.7865	-0.29573
0.81672	64.03	64.8213	-0.296426
0.81676	67	64.8561	-0.297123
0.8168	62.65	64.891	-0.29782
0.81684	68.1	64.9258	-0.298516
0.81688	62.93	64.9607	-0.299213
0.81692	67.43	64.9955	-0.299911
0.81696	61.5	65.0304	-0.300608
0.817	67.29	65.0653	-0.301305
0.81704	61.64	65.1001	-0.302003
0.81708	66.86	65.135	-0.3027
0.81712	62.17	65.1699	-0.303398
0.81716	66.86	65.2048	-0.304096
0.8172	62.36	65.2397	-0.304794
0.81724	66.28	65.2746	-0.305492
0.81728	63.27	65.3095	-0.30619
0.81732	66.71	65.3444	-0.306888
0.81736	63.89	65.3793	-0.307586
0.8174	66.67	65.4142	-0.308284
0.81744	63.94	65.4491	-0.308982
0.81748	67.67	65.484	-0.30968
0.81752	64.13	65.5188	-0.310377
0.81756	66.67	65.5537	-0.311074
0.8176	65.23	65.5885	-0.31177
0.81764	66.57	65.6233	-0.312467
0.81768	66.57	65.6581	-0.313163
0.81772	66.14	65.6929	-0.313858
0.81776	67.96	65.7277	-0.314553
0.8178	64.75	65.7624	-0.315248
0.81784	67.91	65.7971	-0.315941
0.81788	64.56	65.8317	-0.316635
0.81792	68.44	65.8664	-0.317328
0.81796	63.55	65.901	-0.31802
0.818	68.39	65.9356	-0.318712
0.81804	62.17	65.9702	-0.319404
0.81808	67.91	66.0047	-0.320095
0.81812	62.26	66.0392	-0.320785
0.81816	67.24	66.0737	-0.321475
0.8182	63.6	66.1082	-0.322164
0.81824	68.25	66.1426	-0.322853
0.81828	63.41	66.1771	-0.323541
0.81832	67.53	66.2114	-0.324229
0.81836	63.41	66.2458	-0.324915
0.8184	68.44	66.2801	-0.325602
0.81844	64.08	66.3143	-0.326287
0.81848	68.44	66.3486	-0.326971
0.81852	64.46	66.3828	-0.327655
0.81856	68.49	66.4169	-0.328338
0.8186	65.47	66.451	-0.32902
0.81864	68.68	66.485	-0.329701
0.81868	66.47	66.519	-0.33038
0.81872	67.58	66.5529	-0.331059
0.81876	67.43	66.5868	-0.331736
0.8188	67.34	66.6206	-0.332413
0.81884	69.11	66.6544	-0.333088
0.81888	66.33	66.6881	-0.333762
0.81892	69.54	66.7217	-0.334435
0.81896	65.13	66.7553	-0.335107
0.819	69.35	66.7889	-0.335777
0.81904	64.23	66.8223	-0.336447
0.81908	69.35	66.8557	-0.337115
0.81912	64.03	66.8891	-0.337782
0.81916	68.44	66.9224	-0.338448
0.8192	63.99	66.9557	-0.339114
0.81924	68.05	66.9889	-0.339778
0.81928	63.79	67.022	-0.340441
0.81932	68.15	67.0552	-0.341103
0.81936	64.51	67.0882	-0.341764
0.8194	68.72	67.1212	-0.342424
0.81944	64.03	67.1542	-0.343083
0.81948	68.44	67.1871	-0.343741
0.81952	65.47	67.2199	-0.344398
0.81956	69.39	67.2527	-0.345054
0.8196	65.23	67.2854	-0.345708
0.81964	68.82	67.3181	-0.346362
0.81968	66.86	67.3507	-0.347014
0.81972	69.87	67.3832	-0.347664
0.81976	67.14	67.4157	-0.348314
0.8198	69.06	67.4481	-0.348962
0.81984	67.77	67.4804	-0.349609
0.81988	68.63	67.5127	-0.350254
0.81992	70.16	67.5449	-0.350898
0.81996	67.62	67.577	-0.35154
0.82	70.11	67.6091	-0.352182
0.82004	67.19	67.6411	-0.352822
0.82008	70.35	67.673	-0.35346
0.82012	64.66	67.7049	-0.354098
0.82016	69.97	67.7367	-0.354734
0.8202	64.46	67.7684	-0.355369
0.82024	70.3	67.8001	-0.356003
0.82028	65.04	67.8318	-0.356636
0.82032	70.3	67.8634	-0.357268
0.82036	64.13	67.8949	-0.357899
0.8204	69.59	67.9264	-0.358529
0.82044	64.94	67.9579	-0.359158
0.82048	69.35	67.9893	-0.359786
0.82052	65.66	68.0207	-0.360413
0.82056	68.77	68.052	-0.36104
0.8206	66.04	68.0833	-0.361665
0.82064	69.44	68.1145	-0.36229
0.82068	66.52	68.1457	-0.362914
0.82072	69.97	68.1769	-0.363537
0.82076	67.58	68.208	-0.364159
0.8208	70.06	68.239	-0.364781
0.82084	67.34	68.2701	-0.365401
0.82088	69.87	68.301	-0.366021
0.82092	68.87	68.332	-0.366639
0.82096	69.63	68.3629	-0.367257
0.821	69.25	68.3937	-0.367874
0.82104	67.77	68.4245	-0.36849
0.82108	70.93	68.4553	-0.369106
0.82112	66.09	68.486	-0.369721
0.82116	71.45	68.5167	-0.370335
0.8212	65.66	68.5474	-0.370948
0.82124	71.17	68.578	-0.371561
0.82128	65.47	68.6086	-0.372173
0.82132	70.83	68.6392	-0.372785
0.82136	65.61	68.6698	-0.373396
0.8214	70.73	68.7003	-0.374006
0.82144	66.43	68.7308	-0.374617
0.82148	70.02	68.7613	-0.375226
0.82152	65.23	68.7918	-0.375836
0.82156	70.35	68.8223	-0.376445
0.8216	66	68.8527	-0.377054
0.82164	69.87	68.8831	-0.377662
0.82168	65.95	68.9135	-0.37827
0.82172	70.93	68.9439	-0.378878
0.82176	67.34	68.9743	-0.379485
0.8218	70.73	69.0046	-0.380092
0.82184	67.96	69.0349	-0.380699
0.82188	71.07	69.0652	-0.381305
0.82192	67.82	69.0955	-0.38191
0.82196	70.73	69.1258	-0.382516
0.822	69.63	69.156	-0.38312
0.82204	69.73	69.1862	-0.383725
0.82208	70.45	69.2164	-0.384328
0.82212	68.68	69.2466	-0.384932
0.82216	71.98	69.2767	-0.385535
0.8222	67.53	69.3069	-0.386137
0.82224	71.21	69.337	-0.386739
0.82228	66.76	69.367	-0.387341
0.82232	72.17	69.3971	-0.387942
0.82236	66.38	69.4272	-0.388543
0.8224	71.26	69.4572	-0.389144
0.82244	65.66	69.4872	-0.389745
0.82248	71.5	69.5173	-0.390345
0.82252	66.24	69.5473	-0.390945
0.82256	71.12	69.5772	-0.391545
0.8226	67	69.6072	-0.392144
0.82264	70.64	69.6372	-0.392744
0.82268	67.43	69.6671	-0.393343
0.82272	69.87	69.6971	-0.393941
0.82276	68.25	69.727	-0.39454
0.8228	71.6	69.7569	-0.395138
0.82284	68.15	69.7868	-0.395735
0.82288	71.45	69.8166	-0.396332
0.82292	67.91	69.8465	-0.396929
0.82296	71.74	69.8763	-0.397525
0.823	69.35	69.906	-0.398121
0.82304	71.93	69.9358	-0.398716
0.82308	70.78	69.9655	-0.39931
0.82312	70.64	69.9952	-0.399904
0.82316	70.93	70.0249	-0.400497
0.8232	69.54	70.0545	-0.40109
0.82324	72.27	70.0841	-0.401682
0.82328	68.68	70.1137	-0.402273
0.82332	72.84	70.1432	-0.402864
0.82336	67.19	70.1727	-0.403454
0.8234	72.79	70.2022	-0.404043
0.82344	67.34	70.2316	-0.404632
0.82348	72.46	70.261	-0.40522
0.82352	66.86	70.2904	-0.405808
0.82356	72.36	70.3197	-0.406395
0.8236	67.19	70.349	-0.406981
0.82364	72.17	70.3783	-0.407567
0.82368	67.72	70.4076	-0.408152
0.82372	71.69	70.4368	-0.408737
0.82376	67.72	70.466	-0.409321
0.8238	71.88	70.4952	-0.409904
0.82384	68.92	70.5243	-0.410486
0.82388	72.55	70.5534	-0.411068
0.82392	69.25	70.5825	-0.411649
0.82396	72.12	70.6115	-0.41223
0.824	69.01	70.6405	-0.412809
0.82404	72.98	70.6694	-0.413388
0.82408	69.73	70.6983	-0.413965
0.82412	73.22	70.7271	-0.414542
0.82416	70.97	70.7559	-0.415118
0.8242	72.17	70.7847	-0.415693
0.82424	71.74	70.8134	-0.416267
0.82428	70.21	70.842	-0.41684
0.82432	73.51	70.8706	-0.417412
0.82436	69.39	70.8992	-0.417983
0.8244	73.37	70.9277	-0.418554
0.82444	68.49	70.9561	-0.419123
0.82448	72.84	70.9846	-0.419691
0.82452	67.96	71.013	-0.420259
0.82456	74.13	71.0413	-0.420826
0.8246	66.67	71.0696	-0.421392
0.82464	72.98	71.0979	-0.421958
0.82468	67.34	71.1261	-0.422522
0.82472	73.18	71.1543	-0.423086
0.82476	68.63	71.1824	-0.423649
0.8248	71.93	71.2106	-0.424211
0.82484	68.34	71.2386	-0.424773
0.82488	72.89	71.2667	-0.425333
0.82492	69.2	71.2947	-0.425893
0.82496	73.03	71.3226	-0.426452
0.825	70.06	71.3505	-0.42701
0.82504	73.08	71.3784	-0.427567
0.82508	69.83	71.4062	-0.428123
0.82512	74.04	71.4339	-0.428678
0.82516	70.69	71.4616	-0.429232
0.8252	73.18	71.4892	-0.429785
0.82524	72.7	71.5168	-0.430337
0.82528	72.27	71.5444	-0.430887
0.82532	73.37	71.5718	-0.431437
0.82536	70.97	71.5993	-0.431985
0.8254	73.85	71.6266	-0.432532
0.82544	70.26	71.6539	-0.433079
0.82548	74.13	71.6812	-0.433624
0.82552	69.39	71.7084	-0.434168
0.82556	74.42	71.7355	-0.434711
0.8256	69.35	71.7627	-0.435253
0.82564	73.85	71.7897	-0.435794
0.82568	68.34	71.8167	-0.436334
0.82572	73.89	71.8437	-0.436874
0.82576	68.72	71.8706	-0.437412
0.8258	73.37	71.8975	-0.43795
0.82584	68.92	71.9243	-0.438487
0.82588	72.79	71.9511	-0.439023
0.82592	69.73	71.9779	-0.439558
0.82596	73.18	72.0046	-0.440092
0.826	70.35	72.0313	-0.440626
0.82604	73.8	72.0579	-0.441158
0.82608	70.59	72.0845	-0.44169
0.82612	73.03	72.111	-0.442221
0.82616	70.64	72.1375	-0.44275
0.8262	74.85	72.164	-0.443279
0.82624	71.26	72.1904	-0.443807
0.82628	73.8	72.2167	-0.444334
0.82632	72.84	72.243	-0.44486
0.82636	73.51	72.2692	-0.445385
0.8264	73.61	72.2954	-0.445909
0.82644	72.79	72.3216	-0.446432
0.82648	74.47	72.3477	-0.446954
0.82652	70.83	72.3737	-0.447475
0.82656	75.09	72.3998	-0.447995
0.8266	70.88	72.4257	-0.448514
0.82664	74.85	72.4516	-0.449033
0.82668	69.16	72.4775	-0.449551
0.82672	74.32	72.5034	-0.450068
0.82676	68.77	72.5292	-0.450584
0.8268	74.37	72.555	-0.4511
0.82684	69.54	72.5807	-0.451615
0.82688	74.18	72.6065	-0.452129
0.82692	69.54	72.6322	-0.452643
0.82696	73.37	72.6578	-0.453157
0.827	70.26	72.6835	-0.45367
0.82704	73.51	72.7091	-0.454182
0.82708	71.26	72.7347	-0.454694
0.82712	73.94	72.7603	-0.455205
0.82716	71.12	72.7858	-0.455716
0.8272	74.56	72.8113	-0.456226
0.82724	71.02	72.8368	-0.456735
0.82728	74.61	72.8622	-0.457244
0.82732	72.27	72.8876	-0.457752
0.82736	74.9	72.913	-0.458259
0.8274	73.75	72.9383	-0.458766
0.82744	73.51	72.9636	-0.459272
0.82748	73.89	72.9888	-0.459777
0.82752	72.89	73.0141	-0.460281
0.82756	75.47	73.0393	-0.460785
0.8276	71.93	73.0644	-0.461288
0.82764	74.52	73.0895	-0.461791
0.82768	71.69	73.1146	-0.462293
0.82772	75.47	73.1397	-0.462794
0.82776	69.92	73.1647	-0.463295
0.8278	75.23	73.1898	-0.463795
0.82784	69.63	73.2147	-0.464295
0.82788	76.24	73.2397	-0.464794
0.82792	69.49	73.2646	-0.465293
0.82796	75.43	73.2896	-0.465791
0.828	70.35	73.3145	-0.466289
0.82804	74.28	73.3393	-0.466787
0.82808	70.5	73.3642	-0.467284
0.82812	74.61	73.389	-0.467781
0.82816	71.64	73.4138	-0.468277
0.8282	74.95	73.4386	-0.468773
0.82824	71.64	73.4634	-0.469268
0.82828	75.76	73.4881	-0.469763
0.82832	71.79	73.5129	-0.470257
0.82836	75.52	73.5375	-0.470751
0.8284	72.79	73.5622	-0.471244
0.82844	75	73.5868	-0.471737
0.82848	73.89	73.6114	-0.472229
0.82852	74.47	73.636	-0.47272
0.82856	74.18	73.6605	-0.473211
0.8286	74.04	73.685	-0.473701
0.82864	75.04	73.7095	-0.474191
0.82868	72.75	73.734	-0.47468
0.82872	76.62	73.7584	-0.475168
0.82876	71.88	73.7828	-0.475656
0.8288	77.15	73.8072	-0.476143
0.82884	71.21	73.8315	-0.47663
0.82888	76.57	73.8558	-0.477117
0.82892	70.78	73.8801	-0.477603
0.82896	76.05	73.9044	-0.478088
0.829	70.26	73.9287	-0.478574
0.82904	75.28	73.9529	-0.479059
0.82908	70.83	73.9772	-0.479543
0.82912	75.14	74.0014	-0.480028
0.82916	71.55	74.0256	-0.480512
0.8292	75.43	74.0498	-0.480996
0.82924	71.88	74.074	-0.481479
0.82928	76.05	74.0981	-0.481963
0.82932	71.93	74.1223	-0.482446
0.82936	76	74.1464	-0.482928
0.8294	72.7	74.1705	-0.483411
0.82944	77.1	74.1946	-0.483893
0.82948	73.42	74.2187	-0.484374
0.82952	75.86	74.2428	-0.484855
0.82956	73.51	74.2668	-0.485336
0.8296	75.43	74.2908	-0.485817
0.82964	76.48	74.3149	-0.486297
0.82968	74.56	74.3389	-0.486777
0.82972	76.62	74.3628	-0.487257
0.82976	72.98	74.3868	-0.487736
0.8298	76.43	74.4108	-0.488215
0.82984	72.55	74.4347	-0.488694
0.82988	77.1	74.4586	-0.489173
0.82992	71.21	74.4826	-0.489652
0.82996	77.05	74.5065	-0.49013
0.83	71.5	74.5305	-0.490609
0.83004	76.81	74.5544	-0.491088
0.83008	71.21	74.5783	-0.491567
0.83012	76.14	74.6023	-0.492046
0.83016	71.88	74.6263	-0.492525
0.8302	74.76	74.6502	-0.493004
0.83024	71.74	74.6742	-0.493484
0.83028	75.67	74.6982	-0.493964
0.83032	72.41	74.7222	-0.494444
0.83036	75.76	74.7462	-0.494924
0.8304	71.88	74.7702	-0.495405
0.83044	77.96	74.7943	-0.495885
0.83048	73.18	74.8183	-0.496366
0.83052	76.62	74.8423	-0.496847
0.83056	73.75	74.8664	-0.497328
0.8306	76.1	74.8904	-0.497809
0.83064	74.9	74.9145	-0.49829
0.83068	75.9	74.9386	-0.498771
0.83072	75.19	74.9626	-0.499253
0.83076	75.43	74.9867	-0.499734
0.8308	76.24	75.0108	-0.500216
0.83084	74.52	75.0349	-0.500697
0.83088	77.92	75.0589	-0.501179
0.83092	73.51	75.083	-0.501661
0.83096	77.72	75.1071	-0.502143
0.831	72.89	75.1312	-0.502625
0.83104	77.29	75.1553	-0.503107
0.83108	72.17	75.1795	-0.503589
0.83112	77.48	75.2036	-0.504072
0.83116	72.31	75.2277	-0.504555
0.8312	77.48	75.2519	-0.505038
0.83124	71.79	75.2761	-0.505522
0.83128	76.81	75.3003	-0.506005
0.83132	72.17	75.3245	-0.50649
0.83136	76.38	75.3487	-0.506974
0.8314	73.18	75.373	-0.507459
0.83144	76.62	75.3972	-0.507944
0.83148	72.27	75.4215	-0.50843
0.83152	76.91	75.4458	-0.508916
0.83156	74.13	75.4701	-0.509402
0.8316	76.48	75.4944	-0.509888
0.83164	74.23	75.5187	-0.510375
0.83168	78.15	75.5431	-0.510861
0.83172	74.95	75.5674	-0.511348
0.83176	77.15	75.5918	-0.511835
0.8318	75.52	75.6161	-0.512322
0.83184	76.86	75.6405	-0.512809
0.83188	76.67	75.6648	-0.513297
0.83192	76	75.6892	-0.513784
0.83196	78.73	75.7136	-0.514271
0.832	73.61	75.7379	-0.514759
0.83204	78.82	75.7623	-0.515246
0.83208	73.7	75.7867	-0.515734
0.83212	79.35	75.8111	-0.516222
0.83216	73.61	75.8355	-0.51671
0.8322	77.72	75.8599	-0.517198
0.83224	71.98	75.8843	-0.517687
0.83228	77.15	75.9088	-0.518176
0.83232	72.98	75.9332	-0.518665
0.83236	78.01	75.9577	-0.519155
0.8324	72.94	75.9822	-0.519645
0.83244	77.39	76.0068	-0.520135
0.83248	73.03	76.0313	-0.520626
0.83252	77.63	76.0559	-0.521117
0.83256	73.89	76.0804	-0.521609
0.8326	77.58	76.105	-0.522101
0.83264	74.76	76.1297	-0.522593
0.83268	77.77	76.1543	-0.523086
0.83272	74.71	76.1789	-0.523579
0.83276	78.15	76.2036	-0.524072
0.8328	76.48	76.2283	-0.524566
0.83284	78.54	76.253	-0.52506
0.83288	76.34	76.2777	-0.525554
0.83292	77.05	76.3024	-0.526049
0.83296	76.81	76.3272	-0.526544
0.833	76.05	76.3519	-0.527039
0.83304	77.96	76.3767	-0.527534
0.83308	75.04	76.4015	-0.52803
0.83312	80.02	76.4263	-0.528527
0.83316	73.51	76.4512	-0.529024
0.8332	79.02	76.4761	-0.529521
0.83324	73.75	76.501	-0.530019
0.83328	78.54	76.5259	-0.530518
0.83332	74.23	76.5509	-0.531017
0.83336	78.15	76.5759	-0.531517
0.8334	73.22	76.6009	-0.532018
0.83344	77.68	76.6259	-0.532519
0.83348	73.51	76.651	-0.533021
0.83352	78.11	76.6762	-0.533524
0.83356	73.8	76.7014	-0.534027
0.8336	78.25	76.7266	-0.534532
0.83364	73.89	76.7518	-0.535037
0.83368	78.54	76.7771	-0.535543
0.83372	75.04	76.8025	-0.536049
0.83376	78.54	76.8278	-0.536556
0.8338	75.14	76.8532	-0.537064
0.83384	78.63	76.8786	-0.537573
0.83388	75.76	76.9041	-0.538082
0.83392	79.3	76.9296	-0.538592
0.83396	76.62	76.9551	-0.539102
0.834	77.72	76.9807	-0.539614
0.83404	78.25	77.0063	-0.540125
0.83408	76.43	77.0319	-0.540637
0.83412	79.4	77.0575	-0.54115
0.83416	75.62	77.0832	-0.541664
0.8342	80.07	77.1089	-0.542178
0.83424	74.66	77.1346	-0.542693
0.83428	79.54	77.1604	-0.543208
0.83432	74.13	77.1862	-0.543724
0.83436	78.97	77.2121	-0.544241
0.8344	74.47	77.2379	-0.544759
0.83444	78.82	77.2639	-0.545277
0.83448	74.52	77.2898	-0.545796
0.83452	78.2	77.3158	-0.546316
0.83456	74.28	77.3418	-0.546837
0.8346	78.87	77.3679	-0.547358
0.83464	74.32	77.394	-0.54788
0.83468	78.54	77.4202	-0.548403
0.83472	74.8	77.4463	-0.548927
0.83476	80.26	77.4725	-0.549451
0.8348	74.95	77.4988	-0.549976
0.83484	79.16	77.5251	-0.550501
0.83488	76.77	77.5514	-0.551027
0.83492	79.64	77.5777	-0.551553
0.83496	77.87	77.604	-0.55208
0.835	79.21	77.6304	-0.552608
0.83504	78.68	77.6568	-0.553136
0.83508	78.49	77.6832	-0.553664
0.83512	79.06	77.7096	-0.554192
0.83516	77.87	77.7361	-0.554721
0.8352	79.93	77.7625	-0.555251
0.83524	76.24	77.789	-0.555781
0.83528	80.64	77.8155	-0.556311
0.83532	75.67	77.8421	-0.556842
0.83536	80.64	77.8687	-0.557373
0.8354	75.62	77.8952	-0.557905
0.83544	79.73	77.9219	-0.558437
0.83548	74.18	77.9485	-0.558971
0.83552	79.21	77.9752	-0.559504
0.83556	74.71	78.0019	-0.560039
0.8356	80.21	78.0287	-0.560574
0.83564	75.76	78.0555	-0.56111
0.83568	79.21	78.0823	-0.561647
0.83572	75.38	78.1092	-0.562184
0.83576	79.93	78.1361	-0.562722
0.8358	75.43	78.1631	-0.563261
0.83584	78.97	78.19	-0.563801
0.83588	76.29	78.2171	-0.564341
[truncated: 23,003 more rows]

## Sheet: Sheet2
0.9966	51.44	49.966	0.000679069	0.000121503
0.99664	49.91	49.9272	0.00145589	0.000189909
0.99668	52.21	49.8884	0.00223284	0.000257735
0.99672	48.09	49.8495	0.00300991	0.000324972
0.99676	52.35	49.8106	0.00378707	0.000391607
0.9968	47.14	49.7718	0.00456429	0.000457625
0.99684	52.78	49.7329	0.00534155	0.000523012
0.99688	47.23	49.6941	0.00611881	0.000587751
0.99692	51.54	49.6552	0.00689603	0.000651826
0.99696	46.18	49.6163	0.0076732	0.000715218
0.997	51.01	49.5775	0.00845027	0.000777905
0.99704	45.89	49.5386	0.00922723	0.000839868
0.99708	51.21	49.4998	0.0100041	0.000901084
0.99712	46.42	49.461	0.0107808	0.000961531
0.99716	50.25	49.4221	0.0115574	0.00102119
0.9972	46.51	49.3833	0.0123338	0.00108003
0.99724	50.39	49.3445	0.0131102	0.00113805
0.99728	47.33	49.3057	0.0138864	0.00119521
0.99732	50.73	49.2669	0.0146627	0.00125151
0.99736	47.62	49.2281	0.0154389	0.00130694
0.9974	51.21	49.1892	0.0162151	0.00136149
0.99744	47.71	49.1504	0.0169914	0.00141517
0.99748	50.77	49.1116	0.0177678	0.00146798
0.99752	48.14	49.0728	0.0185443	0.00151994
0.99756	51.16	49.034	0.019321	0.00157104
0.9976	49.05	48.9951	0.0200978	0.0016213
0.99764	50.58	48.9563	0.0208748	0.00167072
0.99768	50.01	48.9174	0.021652	0.0017193
0.99772	48.81	48.8785	0.0224294	0.00176705
0.99776	50.63	48.8396	0.023207	0.00181397
0.9978	47.52	48.8008	0.0239848	0.00186007
0.99784	51.25	48.7619	0.0247628	0.00190536
0.99788	46.61	48.723	0.0255409	0.00194984
0.99792	51.73	48.684	0.0263192	0.00199353
0.99796	45.8	48.6451	0.0270975	0.00203644
0.998	50.97	48.6062	0.027876	0.00207857
0.99804	45.37	48.5673	0.0286545	0.00211994
0.99808	51.4	48.5284	0.029433	0.00216056
0.99812	44.89	48.4894	0.0302115	0.00220044
0.99816	49.53	48.4505	0.03099	0.00223959
0.9982	45.65	48.4116	0.0317685	0.00227803
0.99824	49.58	48.3726	0.032547	0.00231575
0.99828	46.13	48.3337	0.0333255	0.00235277
0.99832	49.1	48.2948	0.0341039	0.0023891
0.99836	45.99	48.2559	0.0348824	0.00242475
0.9984	49.72	48.217	0.0356608	0.00245975
0.99844	45.6	48.178	0.0364393	0.0024941
0.99848	49.82	48.1391	0.0372178	0.00252783
0.99852	47.09	48.1002	0.0379965	0.00256095
0.99856	50.1	48.0612	0.0387752	0.00259349
0.9986	47.18	48.0223	0.0395541	0.00262546
0.99864	50.25	47.9833	0.0403332	0.00265689
0.99868	48.14	47.9444	0.0411125	0.0026878
0.99872	49.1	47.9054	0.0418919	0.0027182
0.99876	48.67	47.8664	0.0426716	0.0027481
0.9988	47.18	47.8274	0.0434514	0.00277754
0.99884	50.01	47.7884	0.0442315	0.00280652
0.99888	46.66	47.7494	0.0450117	0.00283506
0.99892	49.91	47.7104	0.045792	0.00286319
0.99896	45.75	47.6714	0.0465725	0.00289092
0.999	50.2	47.6323	0.0473531	0.00291828
0.99904	44.65	47.5933	0.0481338	0.00294528
0.99908	50.63	47.5543	0.0489145	0.00297195
0.99912	44.46	47.5152	0.0496953	0.00299829
0.99916	49.1	47.4762	0.0504761	0.00302431
0.9992	43.55	47.4372	0.0512568	0.00305003
0.99924	49.29	47.3981	0.0520375	0.00307546
0.99928	43.74	47.3591	0.0528181	0.0031006
0.99932	48.67	47.3201	0.0535987	0.00312546
0.99936	44.6	47.281	0.0543793	0.00315005
0.9994	49.15	47.242	0.0551598	0.00317437
0.99944	45.32	47.203	0.0559403	0.00319844
0.99948	48.72	47.164	0.0567208	0.00322226
0.99952	45.22	47.1249	0.0575014	0.00324583
0.99956	49.19	47.0859	0.058282	0.00326916
0.9996	45.94	47.0469	0.0590626	0.00329225
0.99964	49.63	47.0078	0.0598434	0.0033151
0.99968	45.27	46.9688	0.0606242	0.00333771
0.99972	48.96	46.9297	0.0614052	0.00336007
0.99976	46.99	46.8907	0.0621863	0.00338219
0.9998	48	46.8516	0.0629675	0.00340407
0.99984	47.52	46.8126	0.0637488	0.00342571
0.99988	46.9	46.7735	0.0645303	0.00344712
0.99992	48.62	46.7344	0.0653118	0.00346831
0.99996	45.32	46.6953	0.0660934	0.00348931
1	49.53	46.6562	0.0668751	0.00351013
1.00004	44.6	46.6172	0.0676567	0.00353081
1.00008	48.33	46.5781	0.0684384	0.00355139
1.00012	43.74	46.539	0.06922	0.00357189
1.00016	48.72	46.4999	0.0700015	0.00359236
1.0002	43.12	46.4609	0.0707829	0.00361286
1.00024	48.62	46.4218	0.0715641	0.00363342
1.00028	43.02	46.3827	0.0723452	0.00365412
1.00032	47.66	46.3437	0.073126	0.003675
1.00036	42.92	46.3047	0.0739067	0.00369613
1.0004	46.85	46.2656	0.0746872	0.0037176
1.00044	43.93	46.2266	0.0754675	0.00373947
1.00048	47.42	46.1876	0.0762476	0.00376183
1.00052	43.59	46.1486	0.0770275	0.00378476
1.00056	47.04	46.1096	0.0778073	0.00380836
1.0006	44.36	46.0706	0.0785871	0.00383272
1.00064	48.52	46.0317	0.0793667	0.00385794
1.00068	44.6	45.9927	0.0801463	0.00388411
1.00072	48.14	45.9537	0.0809259	0.00391134
1.00076	45.75	45.9147	0.0817056	0.00393972
1.0008	48.05	45.8757	0.0824853	0.00396938
1.00084	46.08	45.8367	0.0832651	0.0040004
1.00088	46.9	45.7978	0.0840449	0.00403292
1.00092	46.8	45.7588	0.0848248	0.00406705
1.00096	46.13	45.7198	0.0856048	0.00410291
1.001	47.62	45.6808	0.0863849	0.00414062
1.00104	44.7	45.6418	0.0871649	0.00418031
1.00108	48.09	45.6027	0.087945	0.00422212
1.00112	43.74	45.5637	0.0887251	0.00426617
1.00116	48	45.5247	0.089505	0.0043126
1.0012	42.78	45.4858	0.0902849	0.00436156
1.00124	48.19	45.4468	0.0910646	0.00441318
1.00128	41.87	45.4078	0.0918441	0.00446761
1.00132	47.28	45.3688	0.0926234	0.00452499
1.00136	42.25	45.3299	0.0934024	0.00458546
1.0014	46.94	45.2909	0.094181	0.00464919
1.00144	42.16	45.252	0.0949594	0.00471633
1.00148	46.61	45.2131	0.0957374	0.00478702
1.00152	42.01	45.1742	0.0965151	0.00486144
1.00156	46.9	45.1354	0.0972924	0.00493974
1.0016	42.49	45.0965	0.0980694	0.00502206
1.00164	46.37	45.0577	0.098846	0.00510857
1.00168	42.97	45.0189	0.0996222	0.00519939
1.00172	46.42	44.9801	0.100398	0.00529467
1.00176	43.5	44.9413	0.101174	0.00539455
1.0018	46.94	44.9026	0.101949	0.00549916
1.00184	44.31	44.8638	0.102724	0.00560865
1.00188	46.61	44.8251	0.103499	0.00572316
1.00192	44.5	44.7863	0.104273	0.00584282
1.00196	45.89	44.7476	0.105047	0.00596778
1.002	45.08	44.7089	0.105821	0.00609818
1.00204	45.08	44.6703	0.106595	0.00623418
1.00208	46.42	44.6316	0.107368	0.00637592
1.00212	44.17	44.5929	0.108141	0.00652356
1.00216	47.28	44.5543	0.108914	0.00667724
1.0022	43.02	44.5157	0.109686	0.00683712
1.00224	47.47	44.4771	0.110458	0.00700332
1.00228	41.44	44.4385	0.11123	0.00717598
1.00232	46.94	44.4	0.112001	0.00735524
1.00236	41.63	44.3614	0.112771	0.00754124
1.0024	46.04	44.323	0.113541	0.00773412
1.00244	40.82	44.2845	0.11431	0.00793405
1.00248	44.89	44.2461	0.115079	0.00814121
1.00252	41.15	44.2077	0.115846	0.00835577
1.00256	45.27	44.1693	0.116614	0.00857792
1.0026	41.82	44.131	0.11738	0.00880782
1.00264	44.84	44.0927	0.118146	0.00904565
1.00268	41.44	44.0545	0.11891	0.00929158
1.00272	45.8	44.0163	0.119675	0.00954577
1.00276	41.73	43.9781	0.120438	0.00980838
1.0028	45.65	43.94	0.121201	0.0100796
1.00284	41.73	43.9019	0.121963	0.0103595
1.00288	45.7	43.8638	0.122724	0.0106484
1.00292	42.25	43.8258	0.123485	0.0109465
1.00296	46.04	43.7877	0.124245	0.0112538
1.003	43.93	43.7498	0.125005	0.0115706
1.00304	45.03	43.7118	0.125764	0.011897
1.00308	44.17	43.6739	0.126522	0.0122333
1.00312	43.79	43.636	0.12728	0.0125797
1.00316	45.17	43.5981	0.128037	0.0129363
1.0032	43.26	43.5603	0.128794	0.0133033
1.00324	46.08	43.5225	0.12955	0.0136809
1.00328	41.3	43.4847	0.130305	0.0140692
1.00332	45.51	43.447	0.13106	0.0144685
1.00336	40.67	43.4093	0.131814	0.0148788
1.0034	46.23	43.3716	0.132568	0.0153004
1.00344	40.29	43.334	0.13332	0.0157334
1.00348	45.65	43.2964	0.134072	0.0161781
1.00352	40.29	43.2588	0.134823	0.0166347
1.00356	44.89	43.2213	0.135574	0.0171032
1.0036	39.96	43.1838	0.136323	0.0175841
1.00364	44.6	43.1464	0.137072	0.0180773
1.00368	40.34	43.109	0.13782	0.0185832
1.00372	44.55	43.0717	0.138567	0.0191019
1.00376	40.44	43.0344	0.139313	0.0196336
1.0038	44.31	42.9971	0.140058	0.0201784
1.00384	41.11	42.9599	0.140803	0.0207366
1.00388	44.74	42.9227	0.141547	0.0213083
1.00392	40.77	42.8855	0.14229	0.0218936
1.00396	44.93	42.8484	0.143032	0.0224929
1.004	41.63	42.8113	0.143773	0.0231063
1.00404	44.89	42.7743	0.144514	0.0237339
1.00408	41.92	42.7373	0.145254	0.0243759
1.00412	44.31	42.7003	0.145994	0.0250327
1.00416	43.35	42.6634	0.146733	0.0257043
1.0042	42.83	42.6265	0.147471	0.0263909
1.00424	44.07	42.5896	0.148208	0.0270928
1.00428	41.92	42.5527	0.148945	0.0278102
1.00432	44.74	42.5159	0.149681	0.0285431
1.00436	40.44	42.4792	0.150417	0.0292919
1.0044	45.08	42.4424	0.151152	0.0300566
1.00444	40.29	42.4057	0.151886	0.0308374
1.00448	44.93	42.3691	0.152619	0.0316345
1.00452	39.19	42.3324	0.153351	0.0324481
1.00456	43.88	42.2959	0.154083	0.0332782
1.0046	39.29	42.2593	0.154813	0.034125
1.00464	43.93	42.2228	0.155543	0.0349887
1.00468	39.05	42.1864	0.156272	0.0358694
1.00472	43.21	42.15	0.157	0.0367674
1.00476	39.53	42.1136	0.157727	0.0376826
1.0048	43.02	42.0773	0.158454	0.0386154
1.00484	39.72	42.0411	0.159179	0.0395658
1.00488	42.88	42.0048	0.159903	0.0405341
1.00492	40	41.9686	0.160627	0.0415203
1.00496	43.59	41.9325	0.16135	0.0425247
1.005	40.1	41.8964	0.162072	0.0435473
1.00504	43.93	41.8603	0.162794	0.0445883
1.00508	40.72	41.8243	0.163514	0.0456479
1.00512	43.45	41.7883	0.164234	0.0467261
1.00516	41.49	41.7523	0.164953	0.0478232
1.0052	42.97	41.7164	0.165672	0.0489391
1.00524	42.73	41.6805	0.16639	0.050074
1.00528	41.97	41.6446	0.167108	0.0512281
1.00532	43.4	41.6088	0.167825	0.0524013
1.00536	40.53	41.5729	0.168541	0.0535938
1.0054	43.59	41.5372	0.169257	0.0548056
1.00544	39.81	41.5014	0.169972	0.0560368
1.00548	44.17	41.4657	0.170686	0.0572875
1.00552	38.57	41.43	0.1714	0.0585577
1.00556	44.07	41.3943	0.172114	0.0598476
1.0056	37.9	41.3587	0.172826	0.0611571
1.00564	43.79	41.3231	0.173538	0.0624863
1.00568	38.19	41.2875	0.174249	0.0638353
1.00572	42.59	41.252	0.17496	0.0652041
1.00576	38.47	41.2165	0.175669	0.0665928
1.0058	43.07	41.1811	0.176379	0.0680012
1.00584	38.14	41.1457	0.177087	0.0694294
1.00588	42.16	41.1103	0.177795	0.0708773
1.00592	38.47	41.0749	0.178502	0.0723448
1.00596	42.73	41.0396	0.179208	0.0738318
1.006	39	41.0043	0.179914	0.0753382
1.00604	42.4	40.9691	0.180619	0.0768639
1.00608	39.57	40.9338	0.181323	0.0784087
1.00612	42.97	40.8986	0.182027	0.0799726
1.00616	39.96	40.8634	0.182731	0.0815553
1.0062	42.54	40.8283	0.183434	0.0831568
1.00624	41.01	40.7932	0.184137	0.0847768
1.00628	42.4	40.758	0.184839	0.0864152
1.00632	42.01	40.7229	0.185541	0.0880718
1.00636	41.54	40.6879	0.186243	0.0897462
1.0064	42.01	40.6528	0.186944	0.0914382
1.00644	39.91	40.6178	0.187644	0.0931474
1.00648	42.64	40.5828	0.188344	0.0948734
1.00652	38.66	40.5478	0.189044	0.0966157
1.00656	43.21	40.5128	0.189743	0.0983737
1.0066	38.33	40.4779	0.190442	0.100147
1.00664	43.16	40.443	0.19114	0.101935
1.00668	36.99	40.4081	0.191838	0.103737
1.00672	42.35	40.3733	0.192535	0.105553
1.00676	37.08	40.3384	0.193231	0.107382
1.0068	41.97	40.3037	0.193927	0.109224
1.00684	36.94	40.2689	0.194621	0.111078
1.00688	41.54	40.2342	0.195316	0.112943
1.00692	37.08	40.1995	0.196009	0.114819
1.00696	41.54	40.1649	0.196702	0.116706
1.007	37.9	40.1303	0.197394	0.118602
1.00704	41.15	40.0958	0.198085	0.120506
1.00708	38.04	40.0612	0.198775	0.122419
1.00712	41.2	40.0267	0.199465	0.124339
1.00716	38.57	39.9923	0.200155	0.126265
1.0072	42.3	39.9578	0.200843	0.128197
1.00724	39.09	39.9234	0.201531	0.130133
1.00728	41.87	39.8891	0.202219	0.132073
1.00732	39.62	39.8547	0.202906	0.134016
1.00736	41.58	39.8204	0.203592	0.13596
1.0074	40.53	39.7861	0.204278	0.137906
1.00744	40.39	39.7518	0.204964	0.139851
1.00748	41.49	39.7176	0.205648	0.141796
1.00752	39	39.6834	0.206333	0.143738
1.00756	41.68	39.6492	0.207016	0.145676
1.0076	37.9	39.615	0.207699	0.147609
1.00764	42.25	39.5809	0.208382	0.149536
1.00768	36.61	39.5468	0.209063	0.151455
1.00772	42.01	39.5128	0.209744	0.153365
1.00776	36.27	39.4788	0.210425	0.155264
1.0078	41.34	39.4448	0.211104	0.157151
1.00784	36.46	39.4109	0.211783	0.159024
1.00788	41.01	39.377	0.21246	0.160881
1.00792	36.32	39.3431	0.213137	0.162722
1.00796	40.48	39.3094	0.213813	0.164544
1.008	36.22	39.2756	0.214488	0.166346
1.00804	40.87	39.2419	0.215162	0.168125
1.00808	36.65	39.2082	0.215835	0.16988
1.00812	40.72	39.1746	0.216508	0.171609
1.00816	36.94	39.141	0.217179	0.17331
1.0082	40.48	39.1075	0.21785	0.174981
1.00824	37.32	39.074	0.21852	0.176619
1.00828	41.3	39.0406	0.219189	0.178222
1.00832	38.23	39.0072	0.219857	0.17979
1.00836	41.3	38.9738	0.220524	0.181318
1.0084	38.42	38.9405	0.221191	0.182806
1.00844	40.24	38.9072	0.221857	0.18425
1.00848	39.91	38.8739	0.222522	0.185649
1.00852	39.24	38.8407	0.223186	0.187
1.00856	40.53	38.8075	0.22385	0.188301
1.0086	38.38	38.7744	0.224513	0.189549
1.00864	40.48	38.7413	0.225175	0.190742
1.00868	37.18	38.7082	0.225836	0.191877
1.00872	41.25	38.6752	0.226496	0.192952
1.00876	35.89	38.6422	0.227155	0.193967
1.0088	40.53	38.6093	0.227814	0.194919
1.00884	35.31	38.5765	0.228471	0.195807
1.00888	40.91	38.5436	0.229127	0.196631
1.00892	35.6	38.5109	0.229782	0.197392
1.00896	40.15	38.4782	0.230437	0.198089
1.009	35.27	38.4455	0.23109	0.198725
1.00904	39.57	38.4129	0.231741	0.199299
1.00908	35.7	38.3804	0.232392	0.199815
1.00912	39.53	38.3479	0.233042	0.200274
1.00916	36.13	38.3155	0.23369	0.200679
1.0092	40	38.2831	0.234337	0.201032
1.00924	35.31	38.2508	0.234984	0.201336
1.00928	39.81	38.2186	0.235629	0.201594
1.00932	36.56	38.1864	0.236273	0.201808
1.00936	40.39	38.1542	0.236915	0.201982
1.0094	37.28	38.1221	0.237557	0.202118
1.00944	39.96	38.0901	0.238198	0.202219
1.00948	38.09	38.0581	0.238838	0.202289
1.00952	39.72	38.0262	0.239477	0.202329
1.00956	39.05	37.9943	0.240114	0.202343
1.0096	37.95	37.9624	0.240751	0.202333
1.00964	39.91	37.9307	0.241387	0.202302
1.00968	36.84	37.8989	0.242021	0.202252
1.00972	40.39	37.8673	0.242655	0.202185
1.00976	36.17	37.8356	0.243287	0.202104
1.0098	40.34	37.8041	0.243918	0.20201
1.00984	35.46	37.7726	0.244548	0.201906
1.00988	39	37.7411	0.245177	0.201793
1.00992	34.12	37.7098	0.245805	0.201674
1.00996	39.05	37.6785	0.246431	0.20155
1.01	35.55	37.6472	0.247055	0.201422
1.01004	38.86	37.6161	0.247679	0.201294
1.01008	34.26	37.585	0.248301	0.201167
1.01012	38.62	37.5539	0.248921	0.201041
1.01016	34.55	37.523	0.249541	0.20092
1.0102	38.33	37.4921	0.250158	0.200804
1.01024	34.93	37.4613	0.250775	0.200696
1.01028	38.9	37.4305	0.25139	0.200595
1.01032	34.98	37.3998	0.252003	0.200503
1.01036	38.71	37.3692	0.252616	0.200423
1.0104	35.65	37.3387	0.253227	0.200354
1.01044	39.43	37.3082	0.253837	0.200297
1.01048	35.98	37.2777	0.254445	0.200255
1.01052	39.14	37.2474	0.255053	0.200228
1.01056	36.8	37.2171	0.255659	0.200217
1.0106	39.14	37.1868	0.256264	0.200222
1.01064	37.95	37.1566	0.256868	0.200246
1.01068	37.71	37.1264	0.257471	0.200288
1.01072	39	37.0963	0.258073	0.200349
1.01076	36.56	37.0663	0.258674	0.200431
1.0108	39.29	37.0363	0.259274	0.200532
1.01084	35.6	37.0064	0.259873	0.200655
1.01088	39.76	36.9765	0.26047	0.200798
1.01092	34.64	36.9467	0.261067	0.200963
1.01096	39.14	36.9169	0.261662	0.20115
1.011	33.78	36.8872	0.262256	0.201358
1.01104	38.86	36.8576	0.262849	0.201587
1.01108	33.64	36.828	0.26344	0.201839
1.01112	38.28	36.7985	0.264031	0.202112
1.01116	33.21	36.769	0.26462	0.202406
1.0112	38.14	36.7396	0.265207	0.202722
1.01124	33.78	36.7103	0.265794	0.203059
1.01128	37.32	36.6811	0.266379	0.203416
1.01132	34.31	36.6519	0.266963	0.203793
1.01136	37.8	36.6227	0.267545	0.20419
1.0114	34.31	36.5937	0.268126	0.204606
1.01144	38.14	36.5647	0.268707	0.20504
1.01148	35.22	36.5357	0.269286	0.205492
1.01152	38.71	36.5068	0.269864	0.205961
1.01156	35.27	36.478	0.27044	0.206445
1.0116	38.66	36.4492	0.271016	0.206945
1.01164	36.13	36.4204	0.271591	0.207458
1.01168	37.8	36.3918	0.272165	0.207984
1.01172	37.23	36.3631	0.272738	0.208523
1.01176	36.56	36.3345	0.27331	0.209072
1.0118	37.95	36.306	0.273881	0.20963
1.01184	36.08	36.2775	0.274451	0.210198
1.01188	38.62	36.249	0.27502	0.210772
1.01192	34.26	36.2206	0.275588	0.211352
1.01196	39.48	36.1923	0.276155	0.211936
1.012	34.12	36.164	0.276721	0.212523
1.01204	38.47	36.1357	0.277286	0.213111
1.01208	33.21	36.1075	0.27785	0.213698
1.01212	37.9	36.0794	0.278412	0.214283
1.01216	33.02	36.0513	0.278974	0.214864
1.0122	37.61	36.0233	0.279534	0.215438
1.01224	32.49	35.9953	0.280094	0.216005
1.01228	37.32	35.9674	0.280652	0.216561
1.01232	33.45	35.9396	0.281209	0.217106
1.01236	36.94	35.9118	0.281764	0.217637
1.0124	33.11	35.8841	0.282319	0.218152
1.01244	37.23	35.8564	0.282872	0.218649
1.01248	33.73	35.8288	0.283425	0.219128
1.01252	37.28	35.8012	0.283976	0.219586
1.01256	34.02	35.7737	0.284526	0.220022
1.0126	37.75	35.7463	0.285074	0.220436
1.01264	34.93	35.7189	0.285622	0.220826
1.01268	38.38	35.6915	0.286169	0.221193
1.01272	35.07	35.6643	0.286715	0.221538
1.01276	37.71	35.637	0.28726	0.22186
1.0128	35.6	35.6098	0.287804	0.222161
1.01284	36.27	35.5827	0.288346	0.222441
1.01288	37.08	35.5556	0.288888	0.222703
1.01292	34.45	35.5285	0.289429	0.222949
1.01296	37.47	35.5015	0.289969	0.22318
1.013	34.4	35.4746	0.290508	0.223398
1.01304	38.57	35.4477	0.291046	0.223606
1.01308	33.4	35.4209	0.291582	0.223806
1.01312	37.66	35.3941	0.292118	0.223999
1.01316	32.15	35.3674	0.292652	0.224189
1.0132	38.04	35.3407	0.293185	0.224376
1.01324	31.87	35.3141	0.293717	0.224562
1.01328	37.08	35.2876	0.294248	0.224748
1.01332	32.06	35.2611	0.294777	0.224937
1.01336	36.7	35.2347	0.295305	0.225129
1.0134	32.97	35.2084	0.295832	0.225326
1.01344	35.46	35.1821	0.296357	0.225529
1.01348	32.63	35.1559	0.296881	0.225738
1.01352	35.84	35.1298	0.297404	0.225956
1.01356	32.87	35.1038	0.297925	0.226183
1.0136	36.51	35.0778	0.298445	0.226421
1.01364	33.83	35.0518	0.298964	0.22667
1.01368	36.84	35.026	0.299481	0.226931
1.01372	33.97	35.0001	0.299997	0.227205
1.01376	37.18	34.9744	0.300512	0.227494
1.0138	34.64	34.9487	0.301026	0.227796
1.01384	36.46	34.9231	0.301538	0.228113
1.01388	34.93	34.8975	0.302049	0.228445
1.01392	35.94	34.872	0.302559	0.228793
1.01396	36.03	34.8466	0.303068	0.229156
1.014	34.12	34.8212	0.303576	0.229534
1.01404	37.08	34.7959	0.304082	0.229929
1.01408	33.4	34.7706	0.304587	0.23034
1.01412	37.13	34.7454	0.305091	0.230767
1.01416	31.68	34.7203	0.305594	0.231211
1.0142	37.52	34.6953	0.306095	0.231671
1.01424	31.68	34.6703	0.306594	0.232148
1.01428	36.89	34.6454	0.307093	0.232642
1.01432	31.48	34.6205	0.307589	0.233152
1.01436	35.98	34.5958	0.308085	0.233677
1.0144	31.2	34.5711	0.308579	0.234218
1.01444	35.89	34.5464	0.309071	0.234774
1.01448	31.68	34.5219	0.309562	0.235344
1.01452	35.65	34.4974	0.310051	0.235927
1.01456	32.35	34.473	0.310539	0.236522
1.0146	35.46	34.4487	0.311025	0.23713
1.01464	32.49	34.4245	0.31151	0.237748
1.01468	35.74	34.4003	0.311994	0.238377
1.01472	33.59	34.3762	0.312476	0.239015
1.01476	35.89	34.3522	0.312956	0.239662
1.0148	32.92	34.3282	0.313436	0.240316
1.01484	36.08	34.3043	0.313913	0.240977
1.01488	33.78	34.2805	0.31439	0.241642
1.01492	36.27	34.2567	0.314865	0.242311
1.01496	34.4	34.233	0.315339	0.242981
1.015	35.94	34.2094	0.315812	0.243653
1.01504	35.03	34.1858	0.316283	0.244323
1.01508	33.83	34.1623	0.316753	0.244991
1.01512	36.37	34.1389	0.317222	0.245656
1.01516	32.15	34.1156	0.317689	0.246315
1.0152	37.08	34.0923	0.318155	0.246969
1.01524	31.58	34.069	0.318619	0.247617
1.01528	36.27	34.0459	0.319082	0.248257
1.01532	30.91	34.0228	0.319544	0.24889
1.01536	35.98	33.9998	0.320004	0.249516
1.0154	30.72	33.9769	0.320462	0.250135
1.01544	36.37	33.954	0.320919	0.250746
1.01548	30.53	33.9313	0.321375	0.251351
1.01552	35.27	33.9086	0.321828	0.251949
1.01556	30.91	33.886	0.322281	0.252542
1.0156	35.12	33.8634	0.322731	0.25313
1.01564	31.44	33.841	0.32318	0.253714
1.01568	34.98	33.8186	0.323627	0.254294
1.01572	31.44	33.7964	0.324073	0.254872
1.01576	34.93	33.7741	0.324517	0.255448
1.0158	31.96	33.752	0.32496	0.256023
1.01584	35.31	33.73	0.325401	0.256597
1.01588	32.97	33.708	0.32584	0.25717
1.01592	35.7	33.6861	0.326278	0.257744
1.01596	32.92	33.6642	0.326715	0.258318
1.016	35.36	33.6425	0.32715	0.258893
1.01604	33.78	33.6208	0.327584	0.259469
1.01608	34.31	33.5992	0.328017	0.260046
1.01612	34.6	33.5776	0.328448	0.260624
1.01616	33.11	33.5561	0.328878	0.261204
1.0162	35.89	33.5347	0.329306	0.261785
1.01624	32.68	33.5133	0.329733	0.262368
1.01628	35.89	33.4921	0.330159	0.262952
1.01632	31.34	33.4709	0.330583	0.263537
1.01636	36.32	33.4497	0.331006	0.264123
1.0164	30.43	33.4287	0.331427	0.26471
1.01644	36.46	33.4077	0.331846	0.265297
1.01648	30.24	33.3868	0.332265	0.265885
1.01652	35.27	33.3659	0.332681	0.266472
1.01656	30.19	33.3452	0.333096	0.267059
1.0166	34.4	33.3245	0.333509	0.267644
1.01664	30.34	33.304	0.333921	0.268229
1.01668	34.36	33.2835	0.334331	0.268812
1.01672	30.43	33.263	0.334739	0.269393
1.01676	33.97	33.2427	0.335146	0.269971
1.0168	30.72	33.2225	0.335551	0.270546
1.01684	34.07	33.2023	0.335954	0.271119
1.01688	31.44	33.1822	0.336356	0.271688
1.01692	34.55	33.1622	0.336756	0.272254
1.01696	32.25	33.1422	0.337155	0.272817
1.017	35.46	33.1224	0.337552	0.273376
1.01704	32.58	33.1026	0.337948	0.273933
1.01708	34.64	33.0829	0.338343	0.274486
1.01712	32.73	33.0632	0.338736	0.275037
1.01716	34.16	33.0436	0.339127	0.275586
1.0172	34.4	33.0241	0.339517	0.276132
1.01724	33.11	33.0047	0.339906	0.276678
1.01728	35.27	32.9853	0.340294	0.277222
1.01732	31.48	32.966	0.34068	0.277766
1.01736	35.5	32.9468	0.341065	0.278311
1.0174	30.67	32.9276	0.341448	0.278855
1.01744	35.74	32.9085	0.34183	0.279401
1.01748	30.29	32.8895	0.34221	0.279949
1.01752	35.07	32.8705	0.342589	0.280497
1.01756	28.9	32.8517	0.342967	0.281048
1.0176	34.36	32.8329	0.343342	0.281601
1.01764	29.57	32.8142	0.343717	0.282156
1.01768	33.97	32.7955	0.344089	0.282713
1.01772	29.47	32.777	0.344461	0.283272
1.01776	33.97	32.7585	0.34483	0.283833
1.0178	29.95	32.7401	0.345198	0.284396
1.01784	34.4	32.7217	0.345565	0.28496
1.01788	30.24	32.7035	0.34593	0.285526
1.01792	34.12	32.6853	0.346294	0.286092
1.01796	31.05	32.6672	0.346656	0.28666
1.018	34.26	32.6491	0.347017	0.287227
1.01804	31.63	32.6312	0.347377	0.287793
1.01808	34.74	32.6132	0.347735	0.288359
1.01812	31.39	32.5954	0.348093	0.288924
1.01816	34.64	32.5776	0.348449	0.289487
1.0182	32.87	32.5598	0.348803	0.290047
1.01824	33.73	32.5421	0.349157	0.290605
1.01828	33.35	32.5245	0.34951	0.29116
1.01832	32.73	32.507	0.349861	0.291712
1.01836	34.21	32.4894	0.350211	0.292259
1.0184	31.87	32.472	0.35056	0.292802
1.01844	34.36	32.4546	0.350909	0.293341
1.01848	30.86	32.4372	0.351255	0.293874
1.01852	35.5	32.4199	0.351601	0.294403
1.01856	29.95	32.4027	0.351946	0.294927
1.0186	34.5	32.3855	0.352289	0.295446
1.01864	29.04	32.3684	0.352631	0.295959
1.01868	34.36	32.3514	0.352972	0.296468
1.01872	28.99	32.3344	0.353312	0.296973
1.01876	33.64	32.3175	0.35365	0.297473
1.0188	29.33	32.3007	0.353987	0.29797
1.01884	33.59	32.2839	0.354323	0.298463
1.01888	29.62	32.2671	0.354657	0.298953
1.01892	33.49	32.2505	0.35499	0.29944
1.01896	30.48	32.2339	0.355322	0.299924
1.019	33.11	32.2173	0.355653	0.300407
1.01904	30.67	32.2009	0.355983	0.300887
1.01908	33.64	32.1845	0.356311	0.301366
1.01912	31.15	32.1681	0.356638	0.301844
1.01916	33.69	32.1518	0.356964	0.30232
1.0192	32.2	32.1355	0.357289	0.302795
1.01924	33.59	32.1193	0.357613	0.30327
1.01928	31.72	32.1032	0.357936	0.303743
1.01932	33.59	32.0871	0.358258	0.304217
1.01936	33.25	32.0711	0.358579	0.30469
1.0194	32.06	32.0551	0.358899	0.305164
1.01944	34.12	32.0391	0.359217	0.305637
1.01948	30	32.0232	0.359535	0.306111
1.01952	34.88	32.0074	0.359852	0.306585
1.01956	30	31.9916	0.360168	0.30706
1.0196	35.6	31.9759	0.360482	0.307536
1.01964	28.99	31.9602	0.360796	0.308012
1.01968	33.78	31.9446	0.361108	0.308489
1.01972	28.18	31.9291	0.361419	0.308966
1.01976	33.54	31.9136	0.361729	0.309444
1.0198	28.52	31.8981	0.362037	0.309923
1.01984	33.06	31.8828	0.362345	0.310401
1.01988	28.09	31.8675	0.362651	0.31088
1.01992	33.4	31.8522	0.362956	0.311358
1.01996	28.9	31.837	0.363259	0.311837
1.02	33.11	31.8219	0.363562	0.312315
1.02004	30.05	31.8068	0.363863	0.312792
1.02008	33.54	31.7918	0.364163	0.313269
1.02012	29.19	31.7769	0.364462	0.313744
1.02016	34.6	31.762	0.36476	0.31422
1.0202	30.72	31.7471	0.365057	0.314694
1.02024	34.45	31.7323	0.365353	0.315167
1.02028	30.91	31.7176	0.365648	0.315641
1.02032	33.88	31.7029	0.365942	0.316113
1.02036	31.53	31.6882	0.366235	0.316585
1.0204	32.82	31.6736	0.366528	0.317057
1.02044	33.4	31.6591	0.366819	0.31753
1.02048	31.96	31.6445	0.367109	0.318002
1.02052	33.59	31.6301	0.367399	0.318474
1.02056	30.43	31.6156	0.367687	0.318948
1.0206	34.07	31.6013	0.367974	0.319421
1.02064	29.95	31.587	0.368261	0.319896
1.02068	34.21	31.5727	0.368546	0.320371
1.02072	28.28	31.5585	0.36883	0.320847
1.02076	34.21	31.5443	0.369113	0.321324
1.0208	28.52	31.5302	0.369395	0.321803
1.02084	32.97	31.5162	0.369676	0.322282
1.02088	28.52	31.5022	0.369955	0.322762
1.02092	32.97	31.4883	0.370233	0.323243
1.02096	28.23	31.4745	0.37051	0.323725
1.021	32.63	31.4607	0.370785	0.324209
1.02104	28.8	31.447	0.371059	0.324693
1.02108	32.87	31.4334	0.371332	0.325178
1.02112	28.95	31.4199	0.371603	0.325665
1.02116	32.58	31.4064	0.371873	0.326152
1.0212	29.19	31.3929	0.372141	0.326641
1.02124	33.02	31.3796	0.372409	0.32713
1.02128	30.24	31.3663	0.372675	0.32762
1.02132	33.3	31.353	0.372939	0.328112
1.02136	30.14	31.3399	0.373203	0.328604
1.0214	32.92	31.3268	0.373465	0.329097
1.02144	31.44	31.3137	0.373726	0.329591
1.02148	32.58	31.3007	0.373985	0.330086
1.02152	32.11	31.2878	0.374244	0.330581
1.02156	32.06	31.275	0.374501	0.331076
1.0216	32.58	31.2622	0.374757	0.331571
1.02164	30.53	31.2494	0.375012	0.332066
1.02168	33.78	31.2368	0.375265	0.332561
1.02172	29.43	31.2242	0.375517	0.333055
1.02176	33.69	31.2116	0.375768	0.333548
1.0218	28.52	31.1991	0.376017	0.33404
1.02184	33.59	31.1868	0.376265	0.334529
1.02188	27.99	31.1744	0.376511	0.335017
1.02192	32.68	31.1622	0.376756	0.335502
1.02196	27.65	31.15	0.377	0.335983
1.022	32.39	31.1379	0.377241	0.336462
1.02204	27.89	31.1259	0.377481	0.336936
1.02208	32.35	31.114	0.37772	0.337406
1.02212	28.28	31.1021	0.377957	0.337872
1.02216	32.39	31.0904	0.378193	0.338332
1.0222	28.95	31.0787	0.378427	0.338788
1.02224	32.78	31.0671	0.378659	0.339238
1.02228	28.52	31.0555	0.37889	0.339684
1.02232	32.82	31.044	0.379119	0.340124
1.02236	29.43	31.0327	0.379347	0.340558
1.0224	32.92	31.0213	0.379573	0.340988
1.02244	29.9	31.0101	0.379798	0.341414
1.02248	32.73	30.9989	0.380022	0.341835
1.02252	30.43	30.9878	0.380244	0.342252
1.02256	32.58	30.9768	0.380465	0.342665
1.0226	32.63	30.9658	0.380684	0.343075
1.02264	30.91	30.9549	0.380903	0.343482
1.02268	32.35	30.944	0.38112	0.343887
1.02272	30.34	30.9332	0.381335	0.34429
1.02276	33.4	30.9225	0.381549	0.344691
1.0228	29.09	30.9119	0.381762	0.345092
1.02284	33.45	30.9013	0.381973	0.345492
1.02288	28.56	30.8908	0.382183	0.345891
1.02292	32.87	30.8804	0.382392	0.346291
1.02296	27.32	30.8701	0.382599	0.346692
1.023	32.87	30.8598	0.382804	0.347093
1.02304	27.61	30.8496	0.383008	0.347496
1.02308	32.44	30.8395	0.383211	0.3479
1.02312	27.18	30.8294	0.383411	0.348305
1.02316	32.39	30.8195	0.383611	0.348713
1.0232	28.61	30.8096	0.383808	0.349122
1.02324	31.58	30.7998	0.384005	0.349533
1.02328	28.09	30.79	0.384199	0.349946
1.02332	32.49	30.7804	0.384393	0.350361
1.02336	28.76	30.7708	0.384584	0.350777
1.0234	32.58	30.7613	0.384775	0.351195
1.02344	28.76	30.7518	0.384964	0.351613
1.02348	32.35	30.7424	0.385151	0.352032
1.02352	29.95	30.7331	0.385337	0.352452
1.02356	32.68	30.7239	0.385522	0.352871
1.0236	30.43	30.7147	0.385706	0.353289
1.02364	32.2	30.7056	0.385888	0.353706
1.02368	30.86	30.6965	0.38607	0.354121
1.02372	31.53	30.6875	0.38625	0.354533
1.02376	32.49	30.6786	0.386428	0.354943
1.0238	30.43	30.6697	0.386606	0.355349
1.02384	33.25	30.6609	0.386782	0.355751
1.02388	29.28	30.6521	0.386958	0.356149
1.02392	33.06	30.6434	0.387131	0.356543
1.02396	28.23	30.6348	0.387304	0.356932
1.024	32.92	30.6262	0.387475	0.357315
1.02404	27.56	30.6177	0.387645	0.357694
1.02408	32.87	30.6093	0.387814	0.358067
1.02412	27.46	30.6009	0.387981	0.358435
1.02416	32.68	30.5926	0.388147	0.358798
1.0242	27.03	30.5844	0.388312	0.359155
1.02424	31.87	30.5763	0.388475	0.359508
1.02428	27.85	30.5682	0.388636	0.359857
1.02432	31.72	30.5602	0.388797	0.360201
1.02436	27.65	30.5522	0.388955	0.360541
1.0244	31.96	30.5444	0.389113	0.360878
1.02444	28.52	30.5366	0.389269	0.361212
1.02448	32.25	30.5288	0.389423	0.361542
1.02452	29.09	30.5212	0.389577	0.36187
1.02456	32.15	30.5136	0.389729	0.362196
1.0246	29.76	30.506	0.389879	0.36252
1.02464	32.73	30.4986	0.390029	0.362843
1.02468	29.86	30.4912	0.390177	0.363165
1.02472	32.2	30.4838	0.390324	0.363485
1.02476	30.91	30.4765	0.39047	0.363805
1.0248	31.1	30.4693	0.390614	0.364125
1.02484	32.3	30.4621	0.390758	0.364445
1.02488	29.71	30.455	0.3909	0.364765
1.02492	32.63	30.448	0.391041	0.365085
1.02496	29.33	30.441	0.39118	0.365406
1.025	32.78	30.4341	0.391319	0.365728
1.02504	27.32	30.4272	0.391456	0.36605
1.02508	32.97	30.4204	0.391591	0.366373
1.02512	27.65	30.4137	0.391725	0.366696
1.02516	32.3	30.4071	0.391858	0.367021
1.0252	26.46	30.4005	0.39199	0.367345
1.02524	31.96	30.394	0.39212	0.36767
1.02528	26.79	30.3876	0.392248	0.367994
1.02532	31.87	30.3813	0.392375	0.368319
1.02536	27.42	30.375	0.3925	0.368642
1.0254	31.63	30.3688	0.392624	0.368965
1.02544	27.65	30.3627	0.392747	0.369285
1.02548	31.68	30.3566	0.392868	0.369604
1.02552	28.42	30.3506	0.392988	0.36992
1.02556	31.82	30.3447	0.393106	0.370233
1.0256	29.09	30.3389	0.393223	0.370543
1.02564	31.91	30.3331	0.393339	0.370848
1.02568	29.57	30.3273	0.393453	0.37115
1.02572	32.54	30.3217	0.393566	0.371447
1.02576	30.38	30.3161	0.393678	0.371739
1.0258	31.82	30.3106	0.393789	0.372027
1.02584	30.67	30.3051	0.393899	0.37231
1.02588	31.24	30.2996	0.394007	0.372588
1.02592	31.39	30.2943	0.394114	0.372862
1.02596	30.57	30.289	0.39422	0.373132
1.026	32.35	30.2837	0.394325	0.373397
1.02604	29.09	30.2785	0.394429	0.373659
1.02608	32.35	30.2734	0.394532	0.373918
1.02612	27.94	30.2684	0.394633	0.374174
1.02616	32.87	30.2634	0.394733	0.374427
1.0262	26.84	30.2584	0.394831	0.374677
1.02624	32.63	30.2536	0.394929	0.374926
1.02628	26.94	30.2488	0.395024	0.375173
1.02632	31.87	30.2441	0.395119	0.375418
1.02636	27.22	30.2394	0.395212	0.375661
1.0264	31.34	30.2348	0.395304	0.375903
1.02644	27.46	30.2303	0.395394	0.376144
1.02648	31.53	30.2259	0.395482	0.376383
1.02652	27.61	30.2215	0.39557	0.37662
1.02656	30.81	30.2172	0.395655	0.376855
1.0266	28.18	30.213	0.39574	0.377088
1.02664	31.29	30.2089	0.395823	0.37732
1.02668	28.56	30.2048	0.395905	0.377549
1.02672	31.68	30.2008	0.395985	0.377776
1.02676	28.95	30.1968	0.396064	0.378001
1.0268	33.11	30.1929	0.396142	0.378224
1.02684	29.62	30.1891	0.396219	0.378444
1.02688	31.87	30.1853	0.396294	0.378663
1.02692	30.67	30.1816	0.396368	0.378879
1.02696	30.57	30.1779	0.396441	0.379092
1.027	31.2	30.1743	0.396513	0.379304
1.02704	29.76	30.1708	0.396584	0.379512
1.02708	33.93	30.1673	0.396654	0.379718
1.02712	28.23	30.1639	0.396722	0.379921
1.02716	32.2	30.1605	0.39679	0.38012
1.0272	27.46	30.1572	0.396856	0.380316
1.02724	32.87	30.154	0.396921	0.380508
1.02728	27.22	30.1508	0.396984	0.380695
1.02732	31.72	30.1477	0.397047	0.380878
1.02736	27.22	30.1446	0.397108	0.381057
1.0274	32.44	30.1416	0.397167	0.38123
1.02744	26.6	30.1387	0.397226	0.381398
1.02748	32.06	30.1359	0.397283	0.38156
1.02752	27.46	30.1331	0.397338	0.381717
1.02756	30.77	30.1304	0.397393	0.381869
1.0276	27.7	30.1277	0.397446	0.382014
1.02764	31.15	30.1251	0.397497	0.382155
1.02768	28.56	30.1226	0.397548	0.38229
1.02772	32.54	30.1202	0.397597	0.38242
1.02776	29.23	30.1178	0.397645	0.382545
1.0278	31.82	30.1154	0.397691	0.382665
1.02784	29.43	30.1132	0.397737	0.382781
1.02788	31.87	30.1109	0.397781	0.382892
1.02792	29.52	30.1088	0.397824	0.382999
1.02796	32.15	30.1067	0.397866	0.383101
1.028	30.48	30.1047	0.397907	0.383199
1.02804	30.81	30.1027	0.397946	0.383292
1.02808	31.58	30.1008	0.397985	0.38338
1.02812	28.99	30.0989	0.398022	0.383463
1.02816	32.01	30.0971	0.398058	0.383541
1.0282	28.04	30.0954	0.398092	0.383614
1.02824	32.39	30.0937	0.398126	0.383681
1.02828	27.99	30.0921	0.398158	0.383742
1.02832	32.11	30.0906	0.398188	0.383797
1.02836	27.75	30.0891	0.398218	0.383846
1.0284	33.11	30.0877	0.398245	0.383888
1.02844	26.84	30.0864	0.398272	0.383924
1.02848	31.87	30.0852	0.398296	0.383953
1.02852	27.27	30.084	0.39832	0.383976
1.02856	31.2	30.0829	0.398341	0.383993
1.0286	26.94	30.0819	0.398362	0.384004
1.02864	32.01	30.081	0.39838	0.384009
1.02868	27.7	30.0801	0.398397	0.384008
1.02872	31.05	30.0794	0.398413	0.384002
1.02876	27.99	30.0787	0.398426	0.38399
1.0288	31.44	30.0781	0.398439	0.383974
1.02884	28.71	30.0775	0.398449	0.383952
1.02888	32.78	30.0771	0.398458	0.383925
1.02892	29.33	30.0767	0.398466	0.383894
1.02896	31.96	30.0764	0.398472	0.383857
1.029	29.9	30.0762	0.398477	0.383816
1.02904	31.34	30.076	0.398479	0.38377
1.02908	30.86	30.076	0.398481	0.383719
				0.383663
