# Supplementary material for: Shear Thickening Fluids in Cork Agglomerates: An Exploration of Advantages and Drawbacks
Source: Preprints.org preprint supplement (doi:10.20944/preprints202304.0004.v1), 2023-04-03
Supplement: Supplementary file 8 [file EN_y_10.xlsx]

## Sheet: data
Time - Voltage - Voltage	Amplitude - Voltage - Voltage
0	547.2
4e-05	554.8
8e-05	546.4
0.00012	554.5
0.00016	547.1
0.0002	553.7
0.00024	547.5
0.00028	553.3
0.00032	548.8
0.00036	552.6
0.0004	549.4
0.00044	553.3
0.00048	549.9
0.00052	553.3
0.00056	550.7
0.0006	553.7
0.00064	551
0.00068	553.3
0.00072	551.7
0.00076	553.1
0.0008	552.4
0.00084	551.6
0.00088	554
0.00092	550.2
0.00096	554.9
0.001	548.8
0.00104	555.1
0.00108	547.3
0.00112	555
0.00116	546.5
0.0012	554.5
0.00124	546.4
0.00128	553.9
0.00132	546.3
0.00136	553.6
0.0014	547.3
0.00144	552.6
0.00148	549
0.00152	552.4
0.00156	549
0.0016	552.6
0.00164	549.7
0.00168	552.7
0.00172	550.4
0.00176	553.1
0.0018	550.9
0.00184	553.5
0.00188	551.8
0.00192	552.1
0.00196	552.2
0.002	551.5
0.00204	553.3
0.00208	549
0.00212	554.5
0.00216	547.8
0.0022	555.7
0.00224	546.5
0.00228	554.9
0.00232	546.1
0.00236	554.4
0.0024	545.6
0.00244	553
0.00248	546.5
0.00252	552.4
0.00256	546.7
0.0026	552.1
0.00264	547.8
0.00268	552.3
0.00272	548.7
0.00276	552.6
0.0028	549.2
0.00284	553.1
0.00288	549.1
0.00292	553.1
0.00296	549.9
0.003	552.6
0.00304	551.4
0.00308	551.7
0.00312	551.8
0.00316	550.2
0.0032	553.3
0.00324	549
0.00328	553.5
0.00332	547.2
0.00336	554.1
0.0034	546.4
0.00344	553.8
0.00348	545.4
0.00352	553.5
0.00356	545.6
0.0036	552.7
0.00364	545.6
0.00368	552
0.00372	546.4
0.00376	552
0.0038	547.2
0.00384	551.9
0.00388	548.5
0.00392	551.8
0.00396	548.5
0.004	552.2
0.00404	549
0.00408	552.1
0.00412	550.2
0.00416	551.8
0.0042	551
0.00424	551
0.00428	552.4
0.00432	549.2
0.00436	552.7
0.0044	548
0.00444	553.2
0.00448	546.5
0.00452	553.4
0.00456	545.6
0.0046	553.5
0.00464	545.1
0.00468	552.1
0.00472	545.4
0.00476	552
0.0048	545.3
0.00484	551.7
0.00488	545.7
0.00492	551.1
0.00496	546.9
0.005	551
0.00504	547.6
0.00508	551.1
0.00512	548.6
0.00516	551.7
0.0052	548.9
0.00524	552.2
0.00528	549.2
0.00532	551.3
0.00536	550.8
0.0054	550.2
0.00544	551.1
0.00548	549.1
0.00552	553.1
0.00556	547.2
0.0056	552.9
0.00564	545.8
0.00568	553.3
0.00572	545.6
0.00576	552.6
0.0058	544.3
0.00584	552.7
0.00588	544.9
0.00592	551
0.00596	545.2
0.006	550.9
0.00604	545.9
0.00608	550.3
0.00612	547.1
0.00616	550.5
0.0062	547.2
0.00624	551
0.00628	548.2
0.00632	551.4
0.00636	548.6
0.0064	551.2
0.00644	549
0.00648	550.3
0.00652	550.2
0.00656	549.6
0.0066	551.7
0.00664	548.3
0.00668	552.2
0.00672	546.6
0.00676	552.5
0.0068	545.7
0.00684	552.7
0.00688	544.5
0.00692	552.1
0.00696	543.9
0.007	551.4
0.00704	544
0.00708	551
0.00712	544.5
0.00716	550.4
0.0072	545.4
0.00724	550.3
0.00728	546.3
0.00732	550.2
0.00736	547
0.0074	550.8
0.00744	547.8
0.00748	550.6
0.00752	547.8
0.00756	550.4
0.0076	548.7
0.00764	550.3
0.00768	549.5
0.00772	548.9
0.00776	550.6
0.0078	547.3
0.00784	551.8
0.00788	545.9
0.00792	551.9
0.00796	544.3
0.008	552.3
0.00804	544.1
0.00808	551.3
0.00812	543.2
0.00816	551
0.0082	543.9
0.00824	550.1
0.00828	544.1
0.00832	549.7
0.00836	544.9
0.0084	549.4
0.00844	546.1
0.00848	549.6
0.00852	546.6
0.00856	549.6
0.0086	547.2
0.00864	550.7
0.00868	547.5
0.00872	550.1
0.00876	548.6
0.0088	549.4
0.00884	549
0.00888	548.8
0.00892	550.3
0.00896	546.6
0.009	551.5
0.00904	545.1
0.00908	552.2
0.00912	543.2
0.00916	551.3
0.0092	542.7
0.00924	550.6
0.00928	542.6
0.00932	549.9
0.00936	543.5
0.0094	549.4
0.00944	543.8
0.00948	549.1
0.00952	545.1
0.00956	548.8
0.0096	545.3
0.00964	549.2
0.00968	546.3
0.00972	549.3
0.00976	546.3
0.0098	549.5
0.00984	547.6
0.00988	548.7
0.00992	548.3
0.00996	548.7
0.01	548.9
0.01004	547.2
0.01008	549.8
0.01012	545.4
0.01016	550.5
0.0102	544.3
0.01024	550.8
0.01028	543
0.01032	550.6
0.01036	542.6
0.0104	550.3
0.01044	542.4
0.01048	549.5
0.01052	542.6
0.01056	548.6
0.0106	543.6
0.01064	548.8
0.01068	544.8
0.01072	548
0.01076	544.9
0.0108	548.1
0.01084	545.8
0.01088	548.6
0.01092	546.2
0.01096	548.8
0.011	546.8
0.01104	548.7
0.01108	547.5
0.01112	548
0.01116	548.6
0.0112	546.1
0.01124	550.1
0.01128	544.9
0.01132	550.3
0.01136	542.9
0.0114	550.1
0.01144	542.3
0.01148	550.2
0.01152	541.5
0.01156	549.6
0.0116	541.3
0.01164	549.1
0.01168	541.7
0.01172	548
0.01176	542.5
0.0118	548.1
0.01184	543.3
0.01188	547.8
0.01192	544.3
0.01196	547.8
0.012	545.2
0.01204	548.9
0.01208	545.5
0.01212	548.6
0.01216	545.4
0.0122	548.3
0.01224	546.7
0.01228	547.2
0.01232	547.5
0.01236	545.7
0.0124	548.8
0.01244	544
0.01248	550.1
0.01252	542
0.01256	550.1
0.0126	541.6
0.01264	549.2
0.01268	540.8
0.01272	548.7
0.01276	541.1
0.0128	548.1
0.01284	541.6
0.01288	546.7
0.01292	542.2
0.01296	547.2
0.013	543.4
0.01304	547.3
0.01308	544.4
0.01312	547.6
0.01316	544.1
0.0132	547.8
0.01324	544.3
0.01328	547.3
0.01332	545.7
0.01336	547.8
0.0134	546
0.01344	545.6
0.01348	546.8
0.01352	544.6
0.01356	548.7
0.0136	542.9
0.01364	549.1
0.01368	541.7
0.01372	548.8
0.01376	540.5
0.0138	548.7
0.01384	539.3
0.01388	548.9
0.01392	540.1
0.01396	546.9
0.014	541.8
0.01404	546.2
0.01408	542.4
0.01412	544.9
0.01416	542.5
0.0142	546
0.01424	543.7
0.01428	547
0.01432	543.4
0.01436	547.8
0.0144	544
0.01444	547.8
0.01448	545.2
0.01452	546.9
0.01456	545.5
0.0146	545.1
0.01464	546.8
0.01468	543.7
0.01472	548.3
0.01476	542.3
0.0148	548.1
0.01484	540.3
0.01488	548.6
0.01492	540.2
0.01496	547.8
0.015	540.1
0.01504	547.3
0.01508	539.6
0.01512	546.5
0.01516	540
0.0152	545.5
0.01524	541.2
0.01528	545.9
0.01532	542.2
0.01536	545.4
0.0154	542.2
0.01544	546
0.01548	543.7
0.01552	546.8
0.01556	543
0.0156	547
0.01564	543.7
0.01568	545.9
0.01572	545.9
0.01576	544.9
0.0158	547.1
0.01584	542.4
0.01588	546.7
0.01592	541.7
0.01596	547.8
0.016	540.2
0.01604	547.3
0.01608	538.9
0.01612	546.7
0.01616	538.7
0.0162	546.8
0.01624	540.1
0.01628	545
0.01632	539.8
0.01636	544.3
0.0164	540.9
0.01644	544.7
0.01648	541.1
0.01652	544.5
0.01656	542.1
0.0166	545.5
0.01664	542.2
0.01668	545.6
0.01672	543.7
0.01676	545.2
0.0168	544.1
0.01684	544.5
0.01688	545
0.01692	542.8
0.01696	545.8
0.017	542
0.01704	546.9
0.01708	540.3
0.01712	547.7
0.01716	538.7
0.0172	547.2
0.01724	537.5
0.01728	546.3
0.01732	538.2
0.01736	545.3
0.0174	539.3
0.01744	545
0.01748	540.6
0.01752	544.3
0.01756	540.8
0.0176	544.8
0.01764	540.5
0.01768	545
0.01772	541.4
0.01776	546.1
0.0178	542.8
0.01784	544.7
0.01788	542.7
0.01792	544
0.01796	543.7
0.018	544
0.01804	544.8
0.01808	542.1
0.01812	545.4
0.01816	541
0.0182	545.6
0.01824	538.9
0.01828	546.3
0.01832	537.5
0.01836	546.3
0.0184	538.8
0.01844	544.7
0.01848	536.2
0.01852	545.6
0.01856	537.5
0.0186	543.9
0.01864	540.1
0.01868	542.8
0.01872	539.7
0.01876	545.2
0.0188	540.3
0.01884	544.7
0.01888	541.8
0.01892	543.6
0.01896	541
0.019	545.1
0.01904	542
0.01908	544.4
0.01912	542.9
0.01916	543.3
0.0192	543.6
0.01924	542.3
0.01928	545.5
0.01932	539.5
0.01936	545.5
0.0194	538.8
0.01944	546.6
0.01948	538.2
0.01952	545.4
0.01956	536.2
0.0196	544.9
0.01964	536.6
0.01968	543.7
0.01972	538.1
0.01976	543.4
0.0198	539
0.01984	542.9
0.01988	539.2
0.01992	543.4
0.01996	540.6
0.02	542.9
0.02004	541.3
0.02008	543.5
0.02012	540.1
0.02016	544.1
0.0202	541
0.02024	543.7
0.02028	541.9
0.02032	542.1
0.02036	542.4
0.0204	541
0.02044	544.6
0.02048	538.5
0.02052	545.6
0.02056	537.8
0.0206	544.8
0.02064	535
0.02068	545.7
0.02072	536.4
0.02076	543.7
0.0208	535.6
0.02084	542.2
0.02088	538.1
0.02092	542.4
0.02096	538
0.021	542.7
0.02104	537.7
0.02108	543.6
0.02112	539.2
0.02116	543.2
0.0212	540.4
0.02124	542.6
0.02128	540.6
0.02132	543.4
0.02136	541.8
0.0214	542.2
0.02144	541.5
0.02148	542
0.02152	542.7
0.02156	539.2
0.0216	543.8
0.02164	538.8
0.02168	544.3
0.02172	537.6
0.02176	545.2
0.0218	536.6
0.02184	543
0.02188	536
0.02192	543.1
0.02196	536.1
0.022	542.8
0.02204	536.1
0.02208	542
0.02212	536.9
0.02216	542.1
0.0222	538.3
0.02224	541.9
0.02228	538.1
0.02232	542.2
0.02236	539.3
0.0224	542.6
0.02244	540.4
0.02248	542.3
0.02252	540.5
0.02256	541.7
0.0226	541.2
0.02264	540.4
0.02268	542.5
0.02272	539
0.02276	543.6
0.0228	536.8
0.02284	543.9
0.02288	536.1
0.02292	543.9
0.02296	534.6
0.023	543.2
0.02304	535.8
0.02308	542.7
0.02312	534.3
0.02316	542.3
0.0232	535.4
0.02324	541.3
0.02328	536.8
0.02332	540.9
0.02336	537.5
0.0234	541.2
0.02344	538
0.02348	542
0.02352	538.1
0.02356	542.5
0.0236	539.6
0.02364	540.3
0.02368	540.1
0.02372	541.3
0.02376	541.1
0.0238	539.4
0.02384	540.8
0.02388	537.8
0.02392	542.1
0.02396	537
0.024	544.3
0.02404	534.5
0.02408	542.8
0.02412	535.1
0.02416	543
0.0242	534.1
0.02424	541.4
0.02428	533.3
0.02432	540.5
0.02436	536.5
0.0244	540.9
0.02444	536.2
0.02448	539.4
0.02452	537.2
0.02456	540.3
0.0246	537.1
0.02464	541
0.02468	538.1
0.02472	541.6
0.02476	538.7
0.0248	541.2
0.02484	539.5
0.02488	539.2
0.02492	539.8
0.02496	538.9
0.025	541.7
0.02504	537.5
0.02508	542.5
0.02512	534.8
0.02516	542.7
0.0252	535.3
0.02524	541.8
0.02528	534.3
0.02532	541.6
0.02536	533.3
0.0254	541.7
0.02544	533.5
0.02548	540.1
0.02552	535
0.02556	539.4
0.0256	535.9
0.02564	539.2
0.02568	536.2
0.02572	539.7
0.02576	537.3
0.0258	540
0.02584	537
0.02588	540.8
0.02592	537.4
0.02596	540.7
0.026	538.8
0.02604	538.8
0.02608	540.3
0.02612	536.8
0.02616	540.8
0.0262	536
0.02624	541.8
0.02628	534
0.02632	541
0.02636	533.7
0.0264	541
0.02644	533.4
0.02648	539.9
0.02652	533.8
0.02656	538.9
0.0266	533.1
0.02664	539.3
0.02668	533.6
0.02672	539.4
0.02676	535.4
0.0268	538.5
0.02684	535.2
0.02688	539.1
0.02692	535.8
0.02696	540.3
0.027	537.2
0.02704	539.2
0.02708	537.1
0.02712	538.5
0.02716	538.1
0.0272	537.3
0.02724	538.8
0.02728	535.3
0.02732	540.2
0.02736	534.7
0.0274	540.7
0.02744	533.2
0.02748	541
0.02752	531.7
0.02756	540.4
0.0276	532.3
0.02764	539.1
0.02768	532.9
0.02772	538.2
0.02776	533.1
0.0278	538.3
0.02784	533.6
0.02788	538.5
0.02792	533.4
0.02796	538.8
0.028	534.5
0.02804	538.5
0.02808	535.3
0.02812	539.4
0.02816	536.2
0.0282	538.1
0.02824	536.9
0.02828	538.6
0.02832	537.9
0.02836	537.5
0.0284	538.6
0.02844	536.8
0.02848	539.3
0.02852	534.1
0.02856	539.3
0.0286	532.5
0.02864	540.6
0.02868	531.6
0.02872	539.7
0.02876	531.3
0.0288	538.7
0.02884	531.2
0.02888	538.4
0.02892	532.8
0.02896	537.1
0.029	533
0.02904	537.7
0.02908	534.1
0.02912	538
0.02916	533.9
0.0292	537.7
0.02924	534.3
0.02928	538
0.02932	535.4
0.02936	537.5
0.0294	536.2
0.02944	536.7
0.02948	536.5
0.02952	535.6
0.02956	538.5
0.0296	533.7
0.02964	538.8
0.02968	532.7
0.02972	539
0.02976	531.2
0.0298	538.8
0.02984	530.5
0.02988	537.9
0.02992	530.4
0.02996	537.6
0.03	530.9
0.03004	536.9
0.03008	531.7
0.03012	536.3
0.03016	532.6
0.0302	536.1
0.03024	533.1
0.03028	536.8
0.03032	534.1
0.03036	536.4
0.0304	533.5
0.03044	537.5
0.03048	534.2
0.03052	536.9
0.03056	535.3
0.0306	535.6
0.03064	536.7
0.03068	534
0.03072	537.7
0.03076	533
0.0308	538.2
0.03084	531.4
0.03088	538.5
0.03092	530.1
0.03096	537.1
0.031	530.3
0.03104	537.1
0.03108	529.4
0.03112	536.8
0.03116	529.8
0.0312	536.1
0.03124	530.8
0.03128	535.6
0.03132	531.2
0.03136	535.8
0.0314	532.6
0.03144	535.4
0.03148	532.6
0.03152	536
0.03156	533.4
0.0316	535.4
0.03164	534.2
0.03168	536.3
0.03172	534.6
0.03176	535
0.0318	535.4
0.03184	533.2
0.03188	536.1
0.03192	531.1
0.03196	537.4
0.032	530.5
0.03204	537.7
0.03208	528.3
0.03212	536.9
0.03216	528.6
0.0322	536.4
0.03224	529.2
0.03228	535.5
0.03232	529.7
0.03236	534.4
0.0324	530.5
0.03244	535
0.03248	530.8
0.03252	534.6
0.03256	531.6
0.0326	535
0.03264	532
0.03268	534.9
0.03272	532.7
0.03276	535.7
0.0328	533.5
0.03284	534.7
0.03288	534.6
0.03292	533.5
0.03296	535.1
0.033	531.6
0.03304	535.7
0.03308	530.5
0.03312	536.3
0.03316	529.4
0.0332	536.1
0.03324	527.9
0.03328	536
0.03332	527.9
0.03336	535.5
0.0334	527.6
0.03344	534.7
0.03348	528.2
0.03352	533.9
0.03356	529.7
0.0336	533.7
0.03364	530.2
0.03368	533.7
0.03372	530.9
0.03376	534.7
0.0338	531
0.03384	534.3
0.03388	532.1
0.03392	534.3
0.03396	533
0.034	533.2
0.03404	533.3
0.03408	531.8
0.03412	534.9
0.03416	530.3
0.0342	535
0.03424	528.9
0.03428	536.2
0.03432	527.2
0.03436	535.1
0.0344	527.3
0.03444	534.3
0.03448	527.3
0.03452	533.7
0.03456	527
0.0346	533.3
0.03464	527.7
0.03468	533.4
0.03472	528.7
0.03476	533.3
0.0348	529.2
0.03484	533
0.03488	530.5
0.03492	533.3
0.03496	530.6
0.035	533.1
0.03504	531.5
0.03508	532.8
0.03512	531.5
0.03516	532
0.0352	533
0.03524	530.4
0.03528	534.1
0.03532	529.4
0.03536	534.7
0.0354	527.3
0.03544	534.4
0.03548	526.4
0.03552	534.8
0.03556	526.2
0.0356	533.3
0.03564	526.4
0.03568	532.3
0.03572	526.1
0.03576	532.7
0.0358	527.8
0.03584	532.3
0.03588	528.1
0.03592	532.1
0.03596	528.8
0.036	532.1
0.03604	528.9
0.03608	532.5
0.03612	529.9
0.03616	532.5
0.0362	530.4
0.03624	532.1
0.03628	531.5
0.03632	530.8
0.03636	532
0.0364	529.2
0.03644	533.9
0.03648	527.5
0.03652	533.6
0.03656	526.6
0.0366	533.7
0.03664	525.8
0.03668	533.2
0.03672	524.9
0.03676	532.5
0.0368	525.2
0.03684	532
0.03688	525.9
0.03692	531.8
0.03696	526.5
0.037	531.1
0.03704	527.1
0.03708	531.3
0.03712	528.4
0.03716	531.3
0.0372	528.6
0.03724	531.7
0.03728	529.3
0.03732	531.7
0.03736	529.6
0.0374	530.6
0.03744	530.7
0.03748	529.9
0.03752	531.8
0.03756	527.6
0.0376	532.5
0.03764	526.6
0.03768	532.8
0.03772	525.4
0.03776	533.1
0.0378	524.7
0.03784	531.7
0.03788	524
0.03792	531.3
0.03796	524.6
0.038	531.3
0.03804	525
0.03808	530.4
0.03812	525.7
0.03816	530
0.0382	526.9
0.03824	530
0.03828	527.1
0.03832	530.6
0.03836	527.5
0.0384	530.5
0.03844	528.1
0.03848	530.5
0.03852	528.7
0.03856	530
0.0386	529.9
0.03864	528.8
0.03868	531.1
0.03872	527.4
0.03876	531.9
0.0388	525.4
0.03884	532.1
0.03888	524.4
0.03892	532
0.03896	523
0.039	531.1
0.03904	523.4
0.03908	530.6
0.03912	523.8
0.03916	529.9
0.0392	524.3
0.03924	529.3
0.03928	524.9
0.03932	529.5
0.03936	525.5
0.0394	529.4
0.03944	526.3
0.03948	529.8
0.03952	526.8
0.03956	529.7
0.0396	527.8
0.03964	530
0.03968	528.2
0.03972	529
0.03976	529.6
0.0398	527.5
0.03984	529.8
0.03988	526
0.03992	530.8
0.03996	524.5
0.04	531.5
0.04004	523.1
0.04008	531.4
0.04012	522.4
0.04016	530.3
0.0402	522.3
0.04024	529.3
0.04028	522.6
0.04032	528.8
0.04036	523.9
0.0404	528.6
0.04044	524.6
0.04048	528.7
0.04052	524.9
0.04056	528.6
0.0406	525.5
0.04064	528.9
0.04068	526.1
0.04072	529.2
0.04076	526.6
0.0408	528.8
0.04084	527.3
0.04088	527.6
0.04092	528.8
0.04096	526
0.041	529.3
0.04104	524.4
0.04108	530.3
0.04112	523.2
0.04116	530
0.0412	522.3
0.04124	530
0.04128	522
0.04132	529.2
0.04136	521.7
0.0414	528.3
0.04144	522.1
0.04148	528
0.04152	522.4
0.04156	528
0.0416	523.6
0.04164	527.7
0.04168	524.2
0.04172	527.7
0.04176	524.6
0.0418	528.2
0.04184	525.6
0.04188	528
0.04192	526.3
0.04196	527.5
0.042	526.7
0.04204	527
0.04208	527.3
0.04212	525.8
0.04216	528.5
0.0422	524.2
0.04224	529.2
0.04228	522.4
0.04232	529.4
0.04236	521.3
0.0424	528.9
0.04244	521.1
0.04248	528.2
0.04252	521.2
0.04256	527.6
0.0426	520.9
0.04264	527.1
0.04268	521.7
0.04272	526.7
0.04276	522.7
0.0428	526.5
0.04284	523.4
0.04288	526.8
0.04292	524.3
0.04296	527
0.043	524.5
0.04304	527.1
0.04308	525.2
0.04312	526.9
0.04316	526.3
0.0432	525.9
0.04324	526.9
0.04328	524.7
0.04332	527.5
0.04336	523.2
0.0434	528.7
0.04344	521.7
0.04348	528.6
0.04352	520.4
0.04356	528.2
0.0436	519.4
0.04364	527.2
0.04368	519.9
0.04372	526.6
0.04376	520.4
0.0438	526.2
0.04384	521.1
0.04388	525.8
0.04392	521.8
0.04396	525.6
0.044	522.7
0.04404	526
0.04408	523.4
0.04412	526.8
0.04416	523.8
0.0442	526.5
0.04424	524.2
0.04428	525.5
0.04432	525.4
0.04436	524.4
0.0444	526.5
0.04444	523.2
0.04448	527.1
0.04452	521.3
0.04456	527.4
0.0446	520.4
0.04464	527.1
0.04468	519.2
0.04472	526.7
0.04476	518.7
0.0448	526.4
0.04484	518.8
0.04488	525.8
0.04492	519.3
0.04496	525.3
0.045	520.5
0.04504	524.7
0.04508	521.2
0.04512	524.7
0.04516	522.1
0.0452	525
0.04524	522
0.04528	525.7
0.04532	522.9
0.04536	525.1
0.0454	523.6
0.04544	525.5
0.04548	524.5
0.04552	523.5
0.04556	525.4
0.0456	522.1
0.04564	526.5
0.04568	520.3
0.04572	527
0.04576	519.1
0.0458	526.9
0.04584	518.3
0.04588	525.9
0.04592	518.1
0.04596	525.3
0.046	518.2
0.04604	524.7
0.04608	519
0.04612	524.1
0.04616	519.5
0.0462	524
0.04624	519.9
0.04628	523.9
0.04632	521
0.04636	524.5
0.0464	521.5
0.04644	524.4
0.04648	521.8
0.04652	524.4
0.04656	523
0.0466	523.8
0.04664	523.7
0.04668	522.5
0.04672	524.7
0.04676	520.9
0.0468	526
0.04684	519
0.04688	526.1
0.04692	517.7
0.04696	525.5
0.047	517.6
0.04704	524.7
0.04708	516.7
0.04712	524.1
0.04716	517
0.0472	523.4
0.04724	517.9
0.04728	523.1
0.04732	519.1
0.04736	522.8
0.0474	519.8
0.04744	523.7
0.04748	520.2
0.04752	523.3
0.04756	520.6
0.0476	523.8
0.04764	521.4
0.04768	523.4
0.04772	522.3
0.04776	521.9
0.0478	523.5
0.04784	520.7
0.04788	524.4
0.04792	519.4
0.04796	524.4
0.048	517.8
0.04804	524.8
0.04808	516.7
0.04812	524.5
0.04816	516.4
0.0482	523.8
0.04824	515.9
0.04828	523.2
0.04832	516.8
0.04836	522.8
0.0484	517
0.04844	522.4
0.04848	518.1
0.04852	521.8
0.04856	518.8
0.0486	522.4
0.04864	519.8
0.04868	522.6
0.04872	519.7
0.04876	522.6
0.0488	520.7
0.04884	521.7
0.04888	521.1
0.04892	521.4
0.04896	522.4
0.049	519.3
0.04904	523.2
0.04908	517.6
0.04912	523.7
0.04916	516.4
0.0492	523.9
0.04924	515.7
0.04928	523.5
0.04932	514.8
0.04936	522.3
0.0494	515.5
0.04944	521.4
0.04948	515.7
0.04952	521.2
0.04956	516.5
0.0496	521
0.04964	517.4
0.04968	520.7
0.04972	517.6
0.04976	521.6
0.0498	518.7
0.04984	521.6
0.04988	519.1
0.04992	521.2
0.04996	519.7
0.05	520.7
0.05004	520.6
0.05008	520.1
0.05012	521.6
0.05016	518.1
0.0502	522.4
0.05024	516.2
0.05028	523
0.05032	514.9
0.05036	522.4
0.0504	514
0.05044	521.8
0.05048	514.1
0.05052	522.1
0.05056	514.3
0.0506	520.5
0.05064	514.9
0.05068	519.8
0.05072	515.8
0.05076	520
0.0508	516.5
0.05084	520.2
0.05088	516.4
0.05092	520.4
0.05096	517.7
0.051	520.5
0.05104	518.3
0.05108	520.3
0.05112	519.4
0.05116	519.4
0.0512	519.8
0.05124	518
0.05128	521
0.05132	516.3
0.05136	521.9
0.0514	515.1
0.05144	521.7
0.05148	513.6
0.05152	521.4
0.05156	512.7
0.0516	520.5
0.05164	513.2
0.05168	520
0.05172	513.9
0.05176	519.7
0.0518	514
0.05184	519.2
0.05188	515
0.05192	518.4
0.05196	515.4
0.052	519.4
0.05204	515.9
0.05208	519.4
0.05212	516.5
0.05216	519.3
0.0522	517.3
0.05224	519.3
0.05228	518.1
0.05232	518.1
0.05236	519.4
0.0524	516.2
0.05244	520.3
0.05248	514.6
0.05252	520.7
0.05256	513.7
0.0526	520.6
0.05264	512.1
0.05268	520.3
0.05272	511.7
0.05276	519.4
0.0528	512.3
0.05284	518.7
0.05288	512.8
0.05292	518.6
0.05296	512.8
0.053	517.9
0.05304	513.8
0.05308	518.2
0.05312	515
0.05316	518.5
0.0532	515.8
0.05324	518.1
0.05328	515.4
0.05332	518.1
0.05336	517
0.0534	517.6
0.05344	517.7
0.05348	516.5
0.05352	518
0.05356	514.7
0.0536	518.9
0.05364	513.2
0.05368	519.6
0.05372	512.4
0.05376	519.4
0.0538	511.2
0.05384	519
0.05388	510.9
0.05392	518.3
0.05396	511.3
0.054	517.6
0.05404	511.6
0.05408	517.3
0.05412	512.2
0.05416	516.7
0.0542	513
0.05424	517.6
0.05428	513.9
0.05432	517.5
0.05436	514.3
0.0544	517.5
0.05444	515.2
0.05448	517
0.05452	515.1
0.05456	516.4
0.0546	517.2
0.05464	514.6
0.05468	518
0.05472	512.8
0.05476	518.4
0.0548	511.9
0.05484	518.4
0.05488	510.7
0.05492	518.4
0.05496	510.1
0.055	517.5
0.05504	509.7
0.05508	516.9
0.05512	510.2
0.05516	516
0.0552	511
0.05524	515.9
0.05528	511.5
0.05532	515.5
0.05536	512.4
0.0554	515.8
0.05544	512.8
0.05548	516
0.05552	513.6
0.05556	516.5
0.0556	514
0.05564	515.6
0.05568	514.6
0.05572	515
0.05576	515.7
0.0558	513.6
0.05584	517.1
0.05588	510.8
0.05592	517.1
0.05596	510.7
0.056	517.5
0.05604	509.2
0.05608	517
0.05612	508.8
0.05616	516.1
0.0562	509
0.05624	515.3
0.05628	509.6
0.05632	514.5
0.05636	509.8
0.0564	514.7
0.05644	510.5
0.05648	514.7
0.05652	511.3
0.05656	514.9
0.0566	511.9
0.05664	514.8
0.05668	512.6
0.05672	514.6
0.05676	512.8
0.0568	514.7
0.05684	513.9
0.05688	513.6
0.05692	514.5
0.05696	511.9
0.057	515.9
0.05704	510.9
0.05708	516.6
0.05712	508.9
0.05716	516.2
0.0572	507.5
0.05724	515.9
0.05728	507.5
0.05732	514.7
0.05736	507.4
0.0574	514.2
0.05744	508.6
0.05748	513.9
0.05752	509.1
0.05756	513.5
0.0576	510
0.05764	513.5
0.05768	510.4
0.05772	513.8
0.05776	510.6
0.0578	514.4
0.05784	511.3
0.05788	514.1
0.05792	512.5
0.05796	513.3
0.058	513.3
0.05804	511.4
0.05808	514.3
0.05812	510.4
0.05816	514.9
0.0582	508.6
0.05824	515
0.05828	507.4
0.05832	515.1
0.05836	507.4
0.0584	514.3
0.05844	505.8
0.05848	513.7
0.05852	506.5
0.05856	513.1
0.0586	507.9
0.05864	512.7
0.05868	507.8
0.05872	512.6
0.05876	509.5
0.0588	512.9
0.05884	509.6
0.05888	512.4
0.05892	510.2
0.05896	512.8
0.059	510.8
0.05904	512.5
0.05908	511.9
0.05912	511.7
0.05916	512.8
0.0592	510.7
0.05924	513.4
0.05928	508.6
0.05932	513.9
0.05936	507.1
0.0594	514.1
0.05944	505.6
0.05948	513.7
0.05952	505.4
0.05956	512.5
0.0596	505.2
0.05964	512
0.05968	506
0.05972	511.3
0.05976	506.7
0.0598	511.8
0.05984	507.7
0.05988	511.4
0.05992	508.5
0.05996	512.1
0.06	508.8
0.06004	511.7
0.06008	509.3
0.06012	511.5
0.06016	510
0.0602	511.3
0.06024	511.1
0.06028	509.8
0.06032	512.2
0.06036	507.8
0.0604	512.9
0.06044	507
0.06048	512.7
0.06052	505.1
0.06056	512.6
0.0606	504.5
0.06064	512.3
0.06068	504.4
0.06072	511.2
0.06076	504.4
0.0608	511.7
0.06084	505.3
0.06088	510.6
0.06092	505.7
0.06096	510.3
0.061	506.7
0.06104	510.7
0.06108	507.3
0.06112	510.3
0.06116	507.5
0.0612	511.2
0.06124	508.7
0.06128	511.1
0.06132	509
0.06136	509.6
0.0614	511.1
0.06144	508
0.06148	511.3
0.06152	506.9
0.06156	511.8
0.0616	505.2
0.06164	511.9
0.06168	504.2
0.06172	511.5
0.06176	503.9
0.0618	510.7
0.06184	504.1
0.06188	510.3
0.06192	503.2
0.06196	510.2
0.062	504.2
0.06204	509
0.06208	505.1
0.06212	509.6
0.06216	505.7
0.0622	509.6
0.06224	506.8
0.06228	509.9
0.06232	507.2
0.06236	509.6
0.0624	507.5
0.06244	509.5
0.06248	508.3
0.06252	508
0.06256	509.5
0.0626	506.8
0.06264	510.2
0.06268	505.2
0.06272	510.8
0.06276	504
0.0628	510.9
0.06284	502.4
0.06288	510.4
0.06292	502.4
0.06296	509.7
0.063	502.3
0.06304	508.8
0.06308	503
0.06312	508.6
0.06316	503.5
0.0632	508
0.06324	504.1
0.06328	508.1
0.06332	505.3
0.06336	508.5
0.0634	505.3
0.06344	508.4
0.06348	506.6
0.06352	508.5
0.06356	507.2
0.0636	507.4
0.06364	507.9
0.06368	506.4
0.06372	508.8
0.06376	504.9
0.0638	509.3
0.06384	503.8
0.06388	509.7
0.06392	501.4
0.06396	509.7
0.064	501.6
0.06404	508.9
0.06408	501
0.06412	508.5
0.06416	501.6
0.0642	507.4
0.06424	502.4
0.06428	507.1
0.06432	502.9
0.06436	507.2
0.0644	503.3
0.06444	507.1
0.06448	504
0.06452	507.8
0.06456	505.1
0.0646	507.7
0.06464	505.1
0.06468	507.5
0.06472	506.5
0.06476	505.6
0.0648	507.3
0.06484	504.3
0.06488	508.2
0.06492	503.1
0.06496	508.9
0.065	501.5
0.06504	508.6
0.06508	500.7
0.06512	508.1
0.06516	500.1
0.0652	507.5
0.06524	499.9
0.06528	506.6
0.06532	500.5
0.06536	505.7
0.0654	500.8
0.06544	505.8
0.06548	502.9
0.06552	506.2
0.06556	502.6
0.0656	506.3
0.06564	503.6
0.06568	506.4
0.06572	503.9
0.06576	506.3
0.0658	505
0.06584	505.4
0.06588	505.3
0.06592	504.5
0.06596	506.9
0.066	502.9
0.06604	507.7
0.06608	500.8
0.06612	507.6
0.06616	499.4
0.0662	507.2
0.06624	498.9
0.06628	506.9
0.06632	499
0.06636	506
0.0664	499.2
0.06644	504.8
0.06648	499.8
0.06652	504.7
0.06656	500.6
0.0666	504.7
0.06664	501.3
0.06668	505.2
0.06672	502.4
0.06676	505.3
0.0668	502.9
0.06684	505.1
0.06688	503.6
0.06692	504.7
0.06696	504.3
0.067	503.4
0.06704	505.2
0.06708	502.1
0.06712	506
0.06716	500.4
0.0672	505.9
0.06724	499.6
0.06728	506.2
0.06732	498
0.06736	506
0.0674	497.6
0.06744	505.2
0.06748	497.8
0.06752	504.3
0.06756	499
0.0676	503.6
0.06764	499.5
0.06768	503.7
0.06772	500.1
0.06776	503.4
0.0678	500.4
0.06784	504
0.06788	501
0.06792	504.1
0.06796	501.4
0.068	504
0.06804	502.8
0.06808	503
0.06812	503.7
0.06816	501.8
0.0682	504.5
0.06824	500
0.06828	505.3
0.06832	498.7
0.06836	505.4
0.0684	497.5
0.06844	505.2
0.06848	497.1
0.06852	504.6
0.06856	496.7
0.0686	503.8
0.06864	496.6
0.06868	503.3
0.06872	497.7
0.06876	502.5
0.0688	498.2
0.06884	502.9
0.06888	499.5
0.06892	502.2
0.06896	499.9
0.069	502.9
0.06904	500.7
0.06908	502.8
0.06912	501
0.06916	502.4
0.0692	501.5
0.06924	501.3
0.06928	502.5
0.06932	500.2
0.06936	503.5
0.0694	498.3
0.06944	504.9
0.06948	496.6
0.06952	504.1
0.06956	495.8
0.0696	503.4
0.06964	495.3
0.06968	502.9
0.06972	495.6
0.06976	501.7
0.0698	496
0.06984	501.7
0.06988	496.9
0.06992	501.8
0.06996	497
0.07	501.1
0.07004	498.1
0.07008	501.3
0.07012	498
0.07016	501.7
0.0702	499.1
0.07024	501.6
0.07028	499.7
0.07032	500.8
0.07036	500.8
0.0704	499.7
0.07044	501.7
0.07048	498.1
0.07052	501.8
0.07056	496.2
0.0706	503.2
0.07064	495.5
0.07068	502.9
0.07072	494.3
0.07076	502.4
0.0708	494
0.07084	501.5
0.07088	494.4
0.07092	501.1
0.07096	494.9
0.071	500.1
0.07104	495.5
0.07108	500.1
0.07112	495.9
0.07116	499.7
0.0712	497.8
0.07124	500
0.07128	497
0.07132	500
0.07136	497.5
0.0714	500.8
0.07144	498.7
0.07148	499.1
0.07152	499.5
0.07156	498.2
0.0716	501.3
0.07164	496.1
0.07168	500.6
0.07172	495.1
0.07176	501.3
0.0718	493.6
0.07184	501.2
0.07188	492.9
0.07192	500.4
0.07196	492.9
0.072	500
0.07204	493.5
0.07208	499.2
0.07212	493.6
0.07216	498.7
0.0722	494.6
0.07224	498.7
0.07228	494.8
0.07232	498.8
0.07236	496.3
0.0724	498.9
0.07244	495.9
0.07248	499.8
0.07252	497.7
0.07256	498.2
0.0726	498.4
0.07264	497.6
0.07268	498.8
0.07272	495.8
0.07276	499.4
0.0728	494.4
0.07284	500.1
0.07288	493.2
0.07292	500
0.07296	491.8
0.073	500.1
0.07304	491.4
0.07308	499.3
0.07312	491.3
0.07316	497.7
0.0732	492.2
0.07324	497.7
0.07328	493.1
0.07332	497
0.07336	493.5
0.0734	497.7
0.07344	494
0.07348	497.8
0.07352	494.6
0.07356	497.7
0.0736	495.6
0.07364	497.2
0.07368	496.7
0.07372	496.7
0.07376	497.9
0.0738	495.9
0.07384	498.1
0.07388	494
0.07392	498.8
0.07396	492.5
0.074	499.1
0.07404	490.9
0.07408	498.5
0.07412	490.5
0.07416	498
0.0742	490.2
0.07424	497.7
0.07428	490.2
0.07432	496
0.07436	490.9
0.0744	496.1
0.07444	492.1
0.07448	495.7
0.07452	492.8
0.07456	495.7
0.0746	493.6
0.07464	497
0.07468	493.8
0.07472	496.5
0.07476	494.2
0.0748	496.2
0.07484	495
0.07488	495.3
0.07492	496.5
0.07496	493.3
0.075	496.9
0.07504	491.4
0.07508	497.8
0.07512	491.2
0.07516	497.3
0.0752	489.5
0.07524	497.3
0.07528	488.8
0.07532	496.6
0.07536	488.7
0.0754	495.5
0.07544	489.9
0.07548	495.4
0.07552	490.2
0.07556	494.7
0.0756	491.5
0.07564	494.4
0.07568	491.5
0.07572	494.9
0.07576	492
0.0758	494.9
0.07584	492.9
0.07588	495
0.07592	493
0.07596	494.5
0.076	494.4
0.07604	492.8
0.07608	495.4
0.07612	491.8
0.07616	495.5
0.0762	490
0.07624	495.9
0.07628	489.1
0.07632	496.1
0.07636	487.3
0.0764	495.5
0.07644	487.3
0.07648	495
0.07652	487.7
0.07656	494.1
0.0766	488
0.07664	493.3
0.07668	489.1
0.07672	493.1
0.07676	489.8
0.0768	493.6
0.07684	490.4
0.07688	493.6
0.07692	490.5
0.07696	493.5
0.077	491.9
0.07704	493.7
0.07708	492.6
0.07712	492.7
0.07716	493.1
0.0772	490.9
0.07724	494.6
0.07728	490.2
0.07732	494.7
0.07736	488.4
0.0774	494.7
0.07744	487.2
0.07748	494.7
0.07752	486.6
0.07756	493.8
0.0776	486
0.07764	493.3
0.07768	486.3
0.07772	493.1
0.07776	487.2
0.0778	492.4
0.07784	487.6
0.07788	491.9
0.07792	488.5
0.07796	492.3
0.078	488.9
0.07804	492
0.07808	489.9
0.07812	492.4
0.07816	490.8
0.0782	491.5
0.07824	490.9
0.07828	491
0.07832	492.6
0.07836	489.3
0.0784	493.3
0.07844	488.2
0.07848	493.4
0.07852	486.2
0.07856	493.3
0.0786	485.8
0.07864	492.8
0.07868	485.1
0.07872	491.6
0.07876	485.2
0.0788	490.9
0.07884	486.1
0.07888	490.9
0.07892	486.5
0.07896	491.4
0.079	487.2
0.07904	490.3
0.07908	487
0.07912	491.4
0.07916	487.5
0.0792	490.6
0.07924	489.1
0.07928	491.2
0.07932	489.7
0.07936	490.3
0.0794	490.5
0.07944	489.3
0.07948	491.5
0.07952	487.6
0.07956	492.4
0.0796	485.6
0.07964	492.4
0.07968	484.7
0.07972	492.4
0.07976	484.1
0.0798	491.2
0.07984	483.6
0.07988	491
0.07992	483.9
[truncated: 98,001 more rows]

## Sheet: Sheet1
		100	50
time	data	butfilt1	Strain
0.288	41.01	38.1005	0.237989
0.28804	35.17	38.0222	0.239555
0.28808	40.34	37.943	0.24114
0.28812	34.55	37.8629	0.242742
0.28816	39.62	37.7819	0.244362
0.2882	34.6	37.7	0.245999
0.28824	39.09	37.6173	0.247654
0.28828	34.6	37.5338	0.249325
0.28832	38.95	37.4494	0.251012
0.28836	34.98	37.3642	0.252716
0.2884	38.47	37.2783	0.254435
0.28844	34.93	37.1915	0.25617
0.28848	38.71	37.104	0.25792
0.28852	35.03	37.0158	0.259685
0.28856	39	36.9268	0.261465
0.2886	35.74	36.837	0.263259
0.28864	38.9	36.7466	0.265067
0.28868	36.17	36.6555	0.26689
0.28872	37.99	36.5637	0.268726
0.28876	36.99	36.4713	0.270575
0.2888	36.46	36.3781	0.272437
0.28884	37.56	36.2844	0.274312
0.28888	35.6	36.19	0.2762
0.28892	38.14	36.095	0.278099
0.28896	34.5	35.9995	0.28001
0.289	38.14	35.9033	0.281933
0.28904	33.21	35.8066	0.283867
0.28908	38.38	35.7094	0.285812
0.28912	32.44	35.6116	0.287767
0.28916	37.37	35.5134	0.289733
0.2892	31.96	35.4146	0.291708
0.28924	36.7	35.3153	0.293693
0.28928	31.29	35.2156	0.295688
0.28932	35.98	35.1154	0.297691
0.28936	31.96	35.0148	0.299703
0.2894	35.84	34.9138	0.301724
0.28944	32.06	34.8124	0.303752
0.28948	36.13	34.7106	0.305789
0.28952	32.39	34.6083	0.307833
0.28956	35.79	34.5057	0.309885
0.2896	32.54	34.4028	0.311944
0.28964	35.89	34.2995	0.31401
0.28968	33.35	34.1959	0.316083
0.28972	35.74	34.0919	0.318162
0.28976	33.4	33.9876	0.320247
0.2898	35.03	33.8831	0.322339
0.28984	34.26	33.7782	0.324436
0.28988	34.16	33.6731	0.326539
0.28992	34.93	33.5677	0.328646
0.28996	32.63	33.462	0.330759
0.29	35.46	33.3561	0.332877
0.29004	31.2	33.25	0.334999
0.29008	35.46	33.1437	0.337126
0.29012	30.14	33.0372	0.339256
0.29016	35.12	32.9305	0.34139
0.2902	29.43	32.8236	0.343527
0.29024	34.5	32.7166	0.345668
0.29028	29.28	32.6094	0.347811
0.29032	33.83	32.5021	0.349957
0.29036	28.99	32.3947	0.352105
0.2904	33.06	32.2872	0.354256
0.29044	29.52	32.1796	0.356408
0.29048	32.82	32.0719	0.358562
0.29052	29.14	31.9641	0.360718
0.29056	33.06	31.8563	0.362874
0.2906	29.19	31.7484	0.365032
0.29064	33.25	31.6405	0.367191
0.29068	29.43	31.5325	0.36935
0.29072	33.25	31.4245	0.37151
0.29076	30.19	31.3165	0.37367
0.2908	32.68	31.2085	0.37583
0.29084	30.43	31.1005	0.37799
0.29088	32.49	30.9925	0.38015
0.29092	30.96	30.8845	0.38231
0.29096	31.05	30.7766	0.384469
0.291	31.72	30.6686	0.386627
0.29104	30.1	30.5608	0.388784
0.29108	32.58	30.453	0.39094
0.29112	28.71	30.3453	0.393094
0.29116	32.68	30.2376	0.395247
0.2912	27.18	30.1301	0.397398
0.29124	32.15	30.0227	0.399547
0.29128	26.46	29.9153	0.401693
0.29132	32.2	29.8081	0.403837
0.29136	26.07	29.7011	0.405979
0.2914	30.67	29.5941	0.408117
0.29144	26.12	29.4874	0.410252
0.29148	30.38	29.3808	0.412384
0.29152	26.17	29.2744	0.414513
0.29156	30.24	29.1681	0.416638
0.2916	26.46	29.0621	0.418759
0.29164	30.29	28.9562	0.420876
0.29168	26.75	28.8506	0.422989
0.29172	30	28.7451	0.425097
0.29176	26.84	28.6399	0.427202
0.2918	30.43	28.5349	0.429302
0.29184	27.03	28.4302	0.431397
0.29188	30.29	28.3256	0.433487
0.29192	27.42	28.2214	0.435573
0.29196	29.52	28.1173	0.437653
0.292	28.37	28.0136	0.439728
0.29204	27.7	27.9101	0.441798
0.29208	29.23	27.8069	0.443863
0.29212	27.18	27.7039	0.445921
0.29216	29.66	27.6013	0.447974
0.2922	25.12	27.4989	0.450021
0.29224	29.62	27.3969	0.452062
0.29228	24.35	27.2952	0.454096
0.29232	28.76	27.1938	0.456124
0.29236	23.78	27.0927	0.458146
0.2924	28.42	26.992	0.46016
0.29244	23.3	26.8916	0.462168
0.29248	27.85	26.7916	0.464168
0.29252	22.77	26.6919	0.466162
0.29256	27.75	26.5926	0.468148
0.2926	23.3	26.4937	0.470126
0.29264	27.13	26.3951	0.472097
0.29268	23.3	26.297	0.474061
0.29272	27.37	26.1992	0.476016
0.29276	23.63	26.1018	0.477964
0.2928	27.22	26.0048	0.479904
0.29284	23.97	25.9082	0.481837
0.29288	27.61	25.812	0.483761
0.29292	24.64	25.7161	0.485677
0.29296	27.22	25.6207	0.487585
0.293	24.93	25.5257	0.489485
0.29304	26.51	25.4311	0.491377
0.29308	25.45	25.337	0.493261
0.29312	25.45	25.2432	0.495136
0.29316	26.17	25.1498	0.497003
0.2932	24.35	25.0569	0.498862
0.29324	27.08	24.9644	0.500711
0.29328	22.72	24.8724	0.502553
0.29332	27.03	24.7807	0.504385
0.29336	21.58	24.6895	0.506209
0.2934	26.79	24.5988	0.508024
0.29344	20.95	24.5085	0.50983
0.29348	26.12	24.4186	0.511628
0.29352	20.81	24.3292	0.513416
0.29356	25.26	24.2403	0.515194
0.2936	20.62	24.1518	0.516964
0.29364	25.07	24.0638	0.518725
0.29368	20.95	23.9762	0.520476
0.29372	24.69	23.8891	0.522218
0.29376	21.48	23.8025	0.523951
0.2938	24.97	23.7163	0.525674
0.29384	21.24	23.6306	0.527388
0.29388	25.07	23.5454	0.529093
0.29392	21.67	23.4606	0.530789
0.29396	25.36	23.3763	0.532475
0.294	22.01	23.2924	0.534152
0.29404	24.78	23.209	0.53582
0.29408	22.77	23.1261	0.537478
0.29412	24.45	23.0436	0.539127
0.29416	23.44	22.9616	0.540768
0.2942	23.49	22.8801	0.542398
0.29424	24.3	22.799	0.54402
0.29428	22.01	22.7184	0.545632
0.29432	25.17	22.6382	0.547235
0.29436	21.1	22.5586	0.548829
0.2944	25.07	22.4793	0.550413
0.29444	19.95	22.4006	0.551988
0.29448	24.59	22.3223	0.553554
0.29452	19.23	22.2445	0.55511
0.29456	24.3	22.1672	0.556656
0.2946	18.94	22.0904	0.558193
0.29464	23.68	22.014	0.55972
0.29468	18.89	21.9381	0.561238
0.29472	23.73	21.8627	0.562746
0.29476	19.13	21.7878	0.564244
0.2948	23.11	21.7134	0.565733
0.29484	19.52	21.6394	0.567212
0.29488	23.39	21.5659	0.568681
0.29492	19.56	21.493	0.570141
0.29496	23.39	21.4205	0.571591
0.295	20.28	21.3485	0.573031
0.29504	23.3	21.2769	0.574461
0.29508	20.09	21.2059	0.575882
0.29512	23.15	21.1354	0.577293
0.29516	21	21.0653	0.578694
0.2952	22.72	20.9957	0.580086
0.29524	21.62	20.9266	0.581467
0.29528	21.53	20.858	0.582839
0.29532	22.25	20.7899	0.584201
0.29536	20.28	20.7223	0.585553
0.2954	23.06	20.6552	0.586896
0.29544	18.94	20.5886	0.588228
0.29548	23.49	20.5225	0.58955
0.29552	18.13	20.4569	0.590861
0.29556	22.82	20.3919	0.592163
0.2956	16.98	20.3273	0.593454
0.29564	22.2	20.2633	0.594735
0.29568	16.79	20.1997	0.596005
0.29572	21.53	20.1368	0.597265
0.29576	16.74	20.0743	0.598514
0.2958	21.19	20.0124	0.599752
0.29584	17.08	19.951	0.60098
0.29588	21.05	19.8901	0.602197
0.29592	17.51	19.8298	0.603403
0.29596	21.48	19.7701	0.604599
0.296	17.55	19.7108	0.605783
0.29604	21.67	19.6521	0.606957
0.29608	18.03	19.594	0.60812
0.29612	21.48	19.5364	0.609272
0.29616	18.13	19.4793	0.610413
0.2962	21.34	19.4228	0.611544
0.29624	19.52	19.3668	0.612663
0.29628	20.91	19.3114	0.613771
0.29632	19.95	19.2566	0.614869
0.29636	19.52	19.2022	0.615955
0.2964	21	19.1485	0.617031
0.29644	18.51	19.0953	0.618095
0.29648	21.14	19.0426	0.619148
0.29652	17.03	18.9905	0.62019
0.29656	21.48	18.939	0.62122
0.2966	16.74	18.888	0.622239
0.29664	20.95	18.8377	0.623247
0.29668	15.26	18.7879	0.624242
0.29672	20.47	18.7387	0.625227
0.29676	15.4	18.69	0.626199
0.2968	20.14	18.642	0.62716
0.29684	15.35	18.5945	0.628109
0.29688	19.76	18.5477	0.629046
0.29692	15.45	18.5014	0.629972
0.29696	19.61	18.4557	0.630885
0.297	15.78	18.4107	0.631786
0.29704	19.71	18.3662	0.632676
0.29708	16.41	18.3223	0.633553
0.29712	19.71	18.2791	0.634419
0.29716	16.41	18.2364	0.635272
0.2972	19.76	18.1943	0.636114
0.29724	16.84	18.1528	0.636943
0.29728	20.04	18.112	0.63776
0.29732	17.79	18.0717	0.638566
0.29736	19.37	18.032	0.639359
0.2974	18.27	17.993	0.640141
0.29744	18.13	17.9545	0.64091
0.29748	19.66	17.9166	0.641667
0.29752	16.93	17.8794	0.642412
0.29756	20	17.8427	0.643145
0.2976	15.74	17.8067	0.643866
0.29764	20.24	17.7713	0.644575
0.29768	14.87	17.7364	0.645271
0.29772	20.09	17.7022	0.645955
0.29776	14.35	17.6686	0.646627
0.2978	19.23	17.6357	0.647287
0.29784	14.06	17.6033	0.647934
0.29788	18.85	17.5716	0.648568
0.29792	14.73	17.5405	0.64919
0.29796	18.42	17.51	0.6498
0.298	14.4	17.4801	0.650397
0.29804	18.37	17.4509	0.650982
0.29808	14.78	17.4223	0.651554
0.29812	18.66	17.3943	0.652114
0.29816	15.02	17.3669	0.652662
0.2982	18.75	17.3402	0.653197
0.29824	15.78	17.314	0.65372
0.29828	18.89	17.2885	0.654231
0.29832	16.07	17.2635	0.654729
0.29836	19.33	17.2392	0.655215
0.2984	16.93	17.2155	0.655689
0.29844	18.56	17.1924	0.656151
0.29848	17.75	17.1699	0.656601
0.29852	17.41	17.148	0.657039
0.29856	18.56	17.1267	0.657465
0.2986	16.31	17.1061	0.657879
0.29864	19.33	17.086	0.658281
0.29868	15.16	17.0665	0.65867
0.29872	19.56	17.0476	0.659048
0.29876	14.3	17.0293	0.659414
0.2988	19.9	17.0116	0.659767
0.29884	13.73	16.9946	0.660109
0.29888	18.56	16.9781	0.660438
0.29892	13.2	16.9622	0.660756
0.29896	18.32	16.947	0.661061
0.299	13.87	16.9323	0.661354
0.29904	18.13	16.9182	0.661636
0.29908	13.87	16.9048	0.661905
0.29912	18.03	16.8919	0.662162
0.29916	14.3	16.8796	0.662408
0.2992	17.94	16.8679	0.662642
0.29924	15.11	16.8568	0.662863
0.29928	18.32	16.8463	0.663074
0.29932	15.35	16.8364	0.663272
0.29936	18.37	16.8271	0.663459
0.2994	15.11	16.8183	0.663634
0.29944	18.66	16.8101	0.663798
0.29948	16.41	16.8025	0.663951
0.29952	18.32	16.7954	0.664092
0.29956	17.32	16.7889	0.664222
0.2996	17.55	16.783	0.664341
0.29964	18.08	16.7776	0.664448
0.29968	16.41	16.7728	0.664544
0.29972	19.04	16.7685	0.66463
0.29976	14.63	16.7648	0.664704
0.2998	19.18	16.7617	0.664767
0.29984	14.2	16.7591	0.664819
0.29988	19.09	16.757	0.66486
0.29992	13.58	16.7555	0.66489
0.29996	18.51	16.7546	0.664909
0.3	13.25	16.7541	0.664917
0.30004	18.18	16.7543	0.664914
0.30008	13.63	16.755	0.664901
0.30012	18.13	16.7562	0.664876
0.30016	13.87	16.758	0.664841
0.3002	17.79	16.7603	0.664795
0.30024	14.25	16.7631	0.664738
0.30028	18.13	16.7665	0.664671
0.30032	15.02	16.7703	0.664593
0.30036	18.32	16.7747	0.664505
0.3004	15.4	16.7797	0.664407
0.30044	18.42	16.7851	0.664298
0.30048	15.5	16.791	0.66418
0.30052	18.85	16.7975	0.664051
0.30056	16.98	16.8044	0.663912
0.3006	18.08	16.8118	0.663763
0.30064	17.32	16.8198	0.663605
0.30068	17.12	16.8282	0.663437
0.30072	18.13	16.8371	0.663259
0.30076	16.12	16.8464	0.663071
0.3008	18.94	16.8563	0.662874
0.30084	15.26	16.8666	0.662667
0.30088	19.33	16.8775	0.662451
0.30092	13.92	16.8888	0.662225
0.30096	18.99	16.9005	0.66199
0.301	13.96	16.9127	0.661745
0.30104	18.51	16.9254	0.661491
0.30108	13.58	16.9386	0.661228
0.30112	18.22	16.9522	0.660955
0.30116	13.92	16.9663	0.660673
0.3012	18.03	16.9809	0.660382
0.30124	14.44	16.9959	0.660082
0.30128	17.99	17.0113	0.659773
0.30132	14.83	17.0272	0.659456
0.30136	18.18	17.0436	0.659129
0.3014	15.11	17.0603	0.658794
0.30144	19.28	17.0775	0.65845
0.30148	15.45	17.0951	0.658097
0.30152	19.13	17.1132	0.657737
0.30156	16.21	17.1316	0.657368
0.3016	19.18	17.1505	0.65699
0.30164	17.27	17.1697	0.656605
0.30168	18.27	17.1894	0.656212
0.30172	18.32	17.2095	0.655811
0.30176	17.55	17.2299	0.655402
0.3018	18.94	17.2508	0.654985
0.30184	16.07	17.272	0.65456
0.30188	19.9	17.2936	0.654128
0.30192	15.3	17.3156	0.653688
0.30196	19.61	17.3379	0.653241
0.302	14.73	17.3607	0.652786
0.30204	19.66	17.3838	0.652324
0.30208	13.96	17.4073	0.651854
0.30212	19.33	17.4311	0.651377
0.30216	14.2	17.4553	0.650893
0.3022	18.75	17.4799	0.650402
0.30224	14.25	17.5049	0.649903
0.30228	18.66	17.5302	0.649397
0.30232	14.78	17.5558	0.648884
0.30236	18.99	17.5818	0.648364
0.3024	15.26	17.6081	0.647838
0.30244	18.56	17.6348	0.647305
0.30248	15.78	17.6618	0.646765
0.30252	19.33	17.6891	0.646218
0.30256	16.31	17.7167	0.645665
0.3026	19.76	17.7447	0.645106
0.30264	16.79	17.7729	0.644541
0.30268	19.61	17.8015	0.64397
0.30272	17.89	17.8304	0.643393
0.30276	19.18	17.8595	0.64281
0.3028	18.85	17.889	0.642221
0.30284	18.37	17.9187	0.641626
0.30288	20.14	17.9487	0.641026
0.30292	17.03	17.979	0.640421
0.30296	20.81	18.0095	0.63981
0.303	16.12	18.0403	0.639194
0.30304	20.52	18.0714	0.638572
0.30308	15.21	18.1027	0.637945
0.30312	20.62	18.1344	0.637313
0.30316	14.97	18.1662	0.636675
0.3032	20.09	18.1984	0.636033
0.30324	15.02	18.2307	0.635385
0.30328	19.76	18.2634	0.634733
0.30332	15.59	18.2962	0.634075
0.30336	19.56	18.3294	0.633413
0.3034	15.74	18.3627	0.632746
0.30344	19.66	18.3963	0.632074
0.30348	16.6	18.4301	0.631398
0.30352	20	18.4642	0.630717
0.30356	16.5	18.4984	0.630031
0.3036	20.47	18.5329	0.629341
0.30364	17.08	18.5676	0.628648
0.30368	20.86	18.6025	0.62795
0.30372	18.03	18.6376	0.627247
0.30376	20.52	18.6729	0.626541
0.3038	18.8	18.7084	0.625832
0.30384	19.95	18.7441	0.625118
0.30388	19.71	18.78	0.624401
0.30392	19.13	18.816	0.62368
0.30396	20.62	18.8522	0.622955
0.304	17.99	18.8886	0.622227
0.30404	21.24	18.9252	0.621496
0.30408	16.93	18.962	0.620761
0.30412	21.58	18.9989	0.620022
0.30416	16.55	19.036	0.61928
0.3042	21.43	19.0732	0.618535
0.30424	16.07	19.1106	0.617787
0.30428	20.95	19.1482	0.617036
0.30432	16.12	19.186	0.616281
0.30436	20.67	19.2239	0.615523
0.3044	16.31	19.2619	0.614762
0.30444	20.62	19.3001	0.613998
0.30448	16.65	19.3385	0.613231
0.30452	20.57	19.377	0.612461
0.30456	17.41	19.4156	0.611688
0.3046	21.1	19.4544	0.610912
0.30464	17.75	19.4933	0.610134
0.30468	21.38	19.5323	0.609353
0.30472	18.27	19.5715	0.60857
0.30476	21.72	19.6108	0.607784
0.3048	19.13	19.6502	0.606996
0.30484	21.62	19.6897	0.606205
0.30488	20	19.7294	0.605413
0.30492	21	19.7691	0.604618
0.30496	20.95	19.8089	0.603821
0.305	20.09	19.8489	0.603022
0.30504	22.2	19.8889	0.602222
0.30508	18.89	19.9291	0.601419
0.30512	22.44	19.9693	0.600614
0.30516	17.84	20.0096	0.599807
0.3052	22.48	20.0501	0.598999
0.30524	17.51	20.0906	0.598188
0.30528	22.68	20.1312	0.597376
0.30532	16.93	20.1719	0.596561
0.30536	22.15	20.2127	0.595745
0.3054	17.08	20.2536	0.594927
0.30544	21.72	20.2946	0.594108
0.30548	17.17	20.3357	0.593286
0.30552	21.62	20.3769	0.592463
0.30556	17.94	20.4181	0.591638
0.3056	21.72	20.4594	0.590811
0.30564	18.08	20.5008	0.589983
0.30568	22.05	20.5423	0.589154
0.30572	18.56	20.5839	0.588322
0.30576	22.44	20.6255	0.58749
0.3058	18.85	20.6672	0.586656
0.30584	22.92	20.709	0.585821
0.30588	20.24	20.7508	0.584985
0.30592	22.53	20.7926	0.584147
0.30596	21.14	20.8346	0.583309
0.306	22.25	20.8765	0.582469
0.30604	22.05	20.9186	0.581629
0.30608	21.14	20.9606	0.580787
0.30612	23.01	21.0027	0.579945
0.30616	20.38	21.0449	0.579102
0.3062	23.83	21.0871	0.578258
0.30624	19.13	21.1294	0.577413
0.30628	23.87	21.1716	0.576567
0.30632	18.42	21.214	0.575721
0.30636	23.78	21.2563	0.574873
0.3064	18.13	21.2988	0.574025
0.30644	23.11	21.3412	0.573176
0.30648	18.08	21.3837	0.572326
0.30652	22.96	21.4262	0.571475
0.30656	18.56	21.4688	0.570623
0.3066	23.06	21.5114	0.569771
0.30664	18.8	21.5541	0.568918
0.30668	22.82	21.5968	0.568064
0.30672	19.66	21.6395	0.567209
0.30676	23.11	21.6823	0.566354
0.3068	19.85	21.7251	0.565498
0.30684	23.54	21.7679	0.564642
0.30688	20.47	21.8107	0.563785
0.30692	24.02	21.8536	0.562928
0.30696	20.95	21.8965	0.56207
0.307	23.92	21.9394	0.561212
0.30704	22.29	21.9823	0.560354
0.30708	23.11	22.0253	0.559495
0.30712	23.2	22.0682	0.558636
0.30716	22.25	22.1112	0.557777
0.3072	24.26	22.1541	0.556917
0.30724	20.76	22.1971	0.556058
0.30728	25.02	22.2401	0.555198
0.30732	19.85	22.2831	0.554338
0.30736	24.97	22.3261	0.553477
0.3074	19.52	22.3692	0.552617
0.30744	24.73	22.4122	0.551756
0.30748	19.61	22.4553	0.550895
0.30752	24.21	22.4983	0.550033
0.30756	19.33	22.5414	0.549171
0.3076	23.92	22.5845	0.548309
0.30764	19.76	22.6277	0.547447
0.30768	23.78	22.6708	0.546584
0.30772	20	22.7139	0.545721
0.30776	24.26	22.7571	0.544858
0.3078	20.67	22.8002	0.543995
0.30784	24.35	22.8434	0.543132
0.30788	21.34	22.8866	0.542268
0.30792	24.93	22.9298	0.541405
0.30796	21.86	22.9729	0.540541
0.308	24.93	23.0161	0.539678
0.30804	22.96	23.0593	0.538814
0.30808	24.59	23.1025	0.537951
0.30812	23.35	23.1456	0.537087
0.30816	24.21	23.1888	0.536224
0.3082	24.69	23.232	0.535361
0.30824	23.3	23.2751	0.534498
0.30828	25.36	23.3182	0.533635
0.30832	22.15	23.3614	0.532772
0.30836	25.79	23.4045	0.53191
0.3084	21.53	23.4476	0.531047
0.30844	26.03	23.4908	0.530185
0.30848	20.71	23.5339	0.529322
0.30852	25.69	23.577	0.52846
0.30856	20.09	23.6201	0.527597
0.3086	25.69	23.6633	0.526735
0.30864	20.86	23.7064	0.525872
0.30868	25.31	23.7495	0.525009
0.30872	20.71	23.7927	0.524146
0.30876	24.97	23.8358	0.523284
0.3088	21.43	23.879	0.522421
0.30884	24.78	23.9221	0.521558
0.30888	21.77	23.9653	0.520695
0.30892	25.4	24.0084	0.519832
0.30896	22.25	24.0516	0.518969
0.309	25.88	24.0947	0.518106
0.30904	22.68	24.1379	0.517243
0.30908	26.55	24.181	0.51638
0.30912	23.78	24.2241	0.515517
0.30916	25.84	24.2673	0.514655
0.3092	24.45	24.3104	0.513792
0.30924	25.45	24.3535	0.51293
0.30928	25.98	24.3966	0.512068
0.30932	23.97	24.4397	0.511206
0.30936	27.08	24.4828	0.510345
0.3094	23.2	24.5258	0.509483
0.30944	27.37	24.5689	0.508622
0.30948	22.44	24.612	0.507761
0.30952	27.27	24.655	0.506899
0.30956	21.72	24.6981	0.506038
0.3096	26.75	24.7411	0.505177
0.30964	21.62	24.7842	0.504316
0.30968	26.36	24.8273	0.503455
0.30972	21.96	24.8703	0.502594
0.30976	26.12	24.9134	0.501732
0.3098	21.67	24.9565	0.500871
0.30984	26.7	24.9995	0.500009
0.30988	22.2	25.0426	0.499148
0.30992	26.03	25.0857	0.498286
0.30996	23.06	25.1288	0.497424
0.31	26.75	25.1719	0.496562
0.31004	23.78	25.215	0.4957
0.31008	26.94	25.2581	0.494838
0.31012	24.26	25.3012	0.493977
0.31016	27.03	25.3443	0.493115
0.3102	24.93	25.3874	0.492253
0.31024	27.18	25.4304	0.491391
0.31028	25.45	25.4735	0.49053
0.31032	26.65	25.5166	0.489668
0.31036	26.65	25.5597	0.488807
0.3104	25.69	25.6027	0.487945
0.31044	27.75	25.6458	0.487084
0.31048	24.16	25.6888	0.486223
0.31052	28.42	25.7319	0.485362
0.31056	23.73	25.775	0.484501
0.3106	28.28	25.818	0.48364
0.31064	22.77	25.8611	0.482778
0.31068	28.56	25.9041	0.481917
0.31072	22.77	25.9472	0.481056
0.31076	27.51	25.9903	0.480194
0.3108	22.96	26.0334	0.479333
0.31084	27.13	26.0765	0.478471
0.31088	23.49	26.1196	0.477608
0.31092	26.79	26.1627	0.476746
0.31096	23.83	26.2058	0.475884
0.311	27.61	26.249	0.475021
0.31104	24.26	26.2921	0.474158
0.31108	27.85	26.3353	0.473295
0.31112	24.45	26.3784	0.472431
0.31116	28.61	26.4216	0.471568
0.3112	24.78	26.4648	0.470705
0.31124	28.66	26.5079	0.469841
0.31128	25.79	26.5511	0.468977
0.31132	28.37	26.5943	0.468114
0.31136	26.65	26.6375	0.46725
0.3114	27.65	26.6807	0.466386
0.31144	28.04	26.7239	0.465523
0.31148	26.94	26.7671	0.464659
0.31152	28.9	26.8103	0.463795
0.31156	25.64	26.8534	0.462931
0.3116	29.28	26.8966	0.462067
0.31164	24.59	26.9399	0.461203
0.31168	29.52	26.9831	0.460339
0.31172	23.92	27.0263	0.459474
0.31176	29.14	27.0695	0.45861
0.3118	24.21	27.1128	0.457745
0.31184	28.71	27.156	0.456879
0.31188	24.26	27.1993	0.456014
0.31192	28.42	27.2426	0.455148
0.31196	24.45	27.2859	0.454282
0.312	28.61	27.3292	0.453415
0.31204	24.88	27.3726	0.452548
0.31208	28.18	27.4159	0.451681
0.31212	25.36	27.4593	0.450814
0.31216	29.04	27.5027	0.449946
0.3122	25.5	27.5461	0.449078
0.31224	29.57	27.5895	0.448209
0.31228	26.94	27.633	0.447341
0.31232	29.66	27.6764	0.446472
0.31236	26.7	27.7198	0.445603
0.3124	29.47	27.7633	0.444734
0.31244	28.09	27.8068	0.443865
0.31248	29.47	27.8502	0.442995
0.31252	29.33	27.8937	0.442126
0.31256	27.85	27.9372	0.441256
0.3126	30.24	27.9807	0.440387
0.31264	26.55	28.0242	0.439517
0.31268	30.53	28.0677	0.438646
0.31272	25.69	28.1112	0.437776
0.31276	30.81	28.1548	0.436905
0.3128	25.21	28.1983	0.436034
0.31284	30.38	28.2419	0.435162
0.31288	24.78	28.2855	0.43429
0.31292	30.24	28.3291	0.433418
0.31296	25.12	28.3728	0.432545
0.313	29.66	28.4164	0.431672
0.31304	25.6	28.4601	0.430798
0.31308	29.81	28.5038	0.429923
0.31312	26.12	28.5476	0.429048
0.31316	29.95	28.5914	0.428173
0.3132	26.51	28.6352	0.427297
0.31324	30.1	28.679	0.426421
0.31328	27.13	28.7228	0.425544
0.31332	30.48	28.7667	0.424666
0.31336	27.7	28.8106	0.423788
0.3134	30.53	28.8545	0.42291
0.31344	28.28	28.8984	0.422032
0.31348	30.57	28.9424	0.421153
0.31352	29.43	28.9863	0.420273
0.31356	29.66	29.0303	0.419394
0.3136	30.91	29.0743	0.418513
0.31364	28.61	29.1184	0.417633
0.31368	31.29	29.1624	0.416752
0.31372	27.56	29.2065	0.41587
0.31376	31.53	29.2506	0.414989
0.3138	26.65	29.2947	0.414106
0.31384	31.68	29.3388	0.413223
0.31388	26.17	29.383	0.41234
0.31392	31.68	29.4272	0.411456
0.31396	26.12	29.4715	0.410571
0.314	31.15	29.5157	0.409685
0.31404	26.55	29.56	0.408799
0.31408	31.05	29.6044	0.407913
0.31412	26.89	29.6487	0.407025
0.31416	30.96	29.6931	0.406137
0.3142	27.51	29.7376	0.405248
0.31424	30.86	29.782	0.404359
0.31428	27.75	29.8265	0.403469
0.31432	31.29	29.8711	0.402578
0.31436	28.23	29.9156	0.401687
0.3144	32.06	29.9602	0.400795
0.31444	29.19	30.0048	0.399903
0.31448	31.91	30.0495	0.39901
0.31452	29.62	30.0942	0.398117
0.31456	31.72	30.1388	0.397223
0.3146	30.72	30.1836	0.396329
0.31464	31.1	30.2283	0.395434
0.31468	31.72	30.2731	0.394539
0.31472	29.71	30.3178	0.393643
0.31476	32.78	30.3627	0.392747
0.3148	28.66	30.4075	0.39185
0.31484	32.87	30.4524	0.390953
0.31488	27.7	30.4973	0.390055
0.31492	33.11	30.5422	0.389156
0.31496	27.61	30.5871	0.388257
0.315	32.63	30.6321	0.387357
0.31504	27.51	30.6772	0.386457
0.31508	32.15	30.7222	0.385555
0.31512	27.61	30.7673	0.384653
0.31516	32.15	30.8125	0.38375
0.3152	27.89	30.8577	0.382847
0.31524	31.96	30.9029	0.381942
0.31528	28.47	30.9481	0.381037
0.31532	31.82	30.9934	0.380131
0.31536	28.95	31.0388	0.379225
0.3154	32.87	31.0841	0.378318
0.31544	29.71	31.1295	0.37741
0.31548	33.06	31.1749	0.376501
0.31552	30.57	31.2204	0.375592
0.31556	33.06	31.2659	0.374683
0.3156	30.96	31.3114	0.373773
0.31564	32.87	31.3569	0.372862
0.31568	32.15	31.4025	0.371951
0.31572	31.44	31.448	0.371039
0.31576	33.25	31.4937	0.370127
0.3158	30.48	31.5393	0.369214
0.31584	33.83	31.5849	0.368301
0.31588	29.57	31.6306	0.367387
0.31592	34.12	31.6763	0.366473
0.31596	29.28	31.7221	0.365558
0.316	34.16	31.7678	0.364643
0.31604	28.76	31.8136	0.363727
0.31608	33.88	31.8595	0.362811
0.31612	28.76	31.9053	0.361893
0.31616	33.78	31.9512	0.360976
0.3162	28.76	31.9971	0.360057
0.31624	33.25	32.0431	0.359138
0.31628	29.28	32.0891	0.358218
0.31632	33.25	32.1351	0.357298
0.31636	29.66	32.1811	0.356377
0.3164	33.49	32.2272	0.355456
0.31644	30.29	32.2733	0.354534
0.31648	34.12	32.3194	0.353611
0.31652	30.91	32.3656	0.352688
0.31656	34.31	32.4118	0.351765
0.3166	31.44	32.4579	0.350841
0.31664	34.31	32.5041	0.349917
0.31668	32.3	32.5504	0.348993
0.31672	34.16	32.5966	0.348068
0.31676	33.21	32.6428	0.347143
0.3168	33.25	32.6891	0.346218
0.31684	34.64	32.7354	0.345292
0.31688	31.91	32.7817	0.344367
0.31692	35.6	32.828	0.343441
0.31696	30.72	32.8743	0.342515
0.317	35.65	32.9206	0.341588
0.31704	30.19	32.9669	0.340662
0.31708	35.5	33.0133	0.339734
0.31712	30	33.0596	0.338807
0.31716	35.12	33.106	0.337879
0.3172	30	33.1524	0.336951
0.31724	34.55	33.1989	0.336023
0.31728	30.34	33.2453	0.335094
0.31732	34.64	33.2918	0.334165
0.31736	30.62	33.3383	0.333235
0.3174	34.74	33.3848	0.332305
0.31744	31.05	33.4313	0.331375
0.31748	34.98	33.4778	0.330444
0.31752	31.2	33.5243	0.329513
0.31756	35.27	33.5709	0.328582
0.3176	32.44	33.6175	0.32765
0.31764	35.74	33.6641	0.326719
0.31768	32.97	33.7107	0.325787
0.31772	35.7	33.7572	0.324855
0.31776	33.64	33.8038	0.323923
0.3178	35.22	33.8505	0.322991
0.31784	34.64	33.8971	0.322059
0.31788	34.64	33.9437	0.321126
0.31792	35.46	33.9903	0.320194
0.31796	33.35	34.0369	0.319262
0.318	36.46	34.0835	0.318329
0.31804	32.49	34.1302	0.317396
0.31808	36.89	34.1768	0.316463
0.31812	31.48	34.2235	0.31553
0.31816	36.65	34.2701	0.314597
0.3182	30.96	34.3168	0.313664
0.31824	36.46	34.3635	0.31273
0.31828	31.24	34.4102	0.311796
0.31832	36.13	34.4569	0.310861
0.31836	31.29	34.5037	0.309927
0.3184	35.79	34.5504	0.308991
0.31844	32.06	34.5972	0.308056
0.31848	35.65	34.644	0.30712
0.31852	32.35	34.6908	0.306184
0.31856	35.94	34.7376	0.305248
0.3186	32.87	34.7844	0.304311
0.31864	36.37	34.8313	0.303374
0.31868	33.25	34.8782	0.302437
0.31872	36.61	34.925	0.301499
0.31876	33.78	34.9719	0.300562
0.3188	36.99	35.0188	0.299624
0.31884	34.79	35.0657	0.298686
0.31888	36.7	35.1126	0.297748
0.31892	35.5	35.1595	0.29681
0.31896	35.5	35.2064	0.295872
0.319	36.94	35.2533	0.294934
0.31904	34.88	35.3002	0.293995
0.31908	37.71	35.3472	0.293057
0.31912	33.45	35.3941	0.292118
0.31916	38.19	35.441	0.29118
0.3192	32.68	35.488	0.290241
0.31924	37.8	35.5349	0.289302
0.31928	32.35	35.5819	0.288363
0.31932	37.47	35.6288	0.287423
0.31936	32.44	35.6758	0.286484
0.3194	37.13	35.7228	0.285544
0.31944	32.58	35.7698	0.284604
0.31948	37.23	35.8168	0.283663
0.31952	33.11	35.8639	0.282723
0.31956	36.7	35.9109	0.281782
0.3196	33.3	35.958	0.280841
0.31964	37.56	36.005	0.2799
0.31968	33.97	36.0521	0.278958
0.31972	37.52	36.0992	0.278017
0.31976	34.6	36.1462	0.277075
0.3198	38.04	36.1933	0.276134
0.31984	35.07	36.2404	0.275193
0.31988	38.38	36.2874	0.274251
0.31992	36.03	36.3345	0.27331
0.31996	38.33	36.3815	0.272369
0.32	36.46	36.4286	0.271429
0.32004	37.23	36.4756	0.270488
0.32008	37.9	36.5226	0.269548
0.32012	36.32	36.5696	0.268608
0.32016	38.71	36.6166	0.267668
0.3202	35.27	36.6636	0.266728
0.32024	39.43	36.7106	0.265789
0.32028	34.12	36.7575	0.26485
0.32032	39.67	36.8045	0.263911
0.32036	33.88	36.8514	0.262972
0.3204	39.05	36.8983	0.262033
0.32044	33.4	36.9453	0.261095
0.32048	38.9	36.9922	0.260156
0.32052	33.93	37.0391	0.259218
0.32056	38.42	37.086	0.25828
0.3206	34.31	37.1329	0.257342
0.32064	38.33	37.1798	0.256404
0.32068	34.64	37.2267	0.255467
0.32072	38.28	37.2735	0.254529
0.32076	35.31	37.3204	0.253592
0.3208	38.81	37.3672	0.252655
0.32084	35.7	37.4141	0.251719
0.32088	39.53	37.4609	0.250783
0.32092	36.08	37.5077	0.249847
0.32096	39.76	37.5544	0.248912
0.321	37.08	37.6012	0.247977
0.32104	39.43	37.6479	0.247042
0.32108	38.19	37.6946	0.246108
0.32112	38.52	37.7412	0.245175
0.32116	38.9	37.7879	0.244243
0.3212	37.85	37.8345	0.24331
0.32124	39.91	37.8811	0.242379
0.32128	36.61	37.9276	0.241448
0.32132	40.48	37.9741	0.240518
0.32136	35.94	38.0206	0.239588
0.3214	40.67	38.0671	0.238658
0.32144	35.41	38.1135	0.237729
0.32148	40.34	38.1599	0.236801
0.32152	34.93	38.2063	0.235873
0.32156	39.81	38.2527	0.234946
0.3216	35.07	38.2991	0.234019
0.32164	39.62	38.3454	0.233092
0.32168	35.46	38.3917	0.232166
0.32172	39.76	38.438	0.23124
0.32176	36.03	38.4842	0.230315
0.3218	39.81	38.5305	0.22939
0.32184	36.51	38.5767	0.228466
0.32188	40.34	38.6229	0.227543
0.32192	37.08	38.669	0.226619
0.32196	40.48	38.7152	0.225697
0.322	37.47	38.7612	0.224775
0.32204	41.15	38.8073	0.223854
0.32208	38.04	38.8533	0.222933
0.32212	40.82	38.8993	0.222014
0.32216	39.09	38.9453	0.221095
0.3222	39.43	38.9912	0.220176
0.32224	39.81	39.0371	0.219259
0.32228	39.05	39.0829	0.218342
0.32232	41.2	39.1287	0.217426
0.32236	38.28	39.1745	0.216511
0.3224	42.68	39.2202	0.215596
0.32244	37.04	39.2659	0.214683
0.32248	41.63	39.3115	0.213769
0.32252	36.51	39.3571	0.212857
0.32256	41.78	39.4027	0.211945
0.3226	36.17	39.4483	0.211034
0.32264	41.11	39.4938	0.210123
0.32268	36.65	39.5393	0.209213
0.32272	40.67	39.5848	0.208304
0.32276	36.27	39.6303	0.207395
0.3228	41.15	39.6757	0.206487
0.32284	37.28	39.7211	0.205579
0.32288	41.25	39.7664	0.204671
0.32292	37.23	39.8118	0.203765
0.32296	41.49	39.8571	0.202859
0.323	38.23	39.9023	0.201953
0.32304	41.44	39.9476	0.201048
0.32308	38.76	39.9928	0.200144
0.32312	41.97	40.038	0.199241
0.32316	39.62	40.0831	0.198338
0.3232	41.68	40.1282	0.197436
0.32324	39.76	40.1732	0.196535
0.32328	41.39	40.2183	0.195635
0.32332	40.96	40.2632	0.194735
0.32336	40.53	40.3082	0.193837
0.3234	42.16	40.3531	0.192939
0.32344	39.67	40.3979	0.192042
0.32348	42.68	40.4427	0.191145
0.32352	38.47	40.4875	0.19025
0.32356	43.21	40.5323	0.189355
0.3236	37.8	40.577	0.188461
0.32364	43.21	40.6216	0.187568
0.32368	37.23	40.6663	0.186675
0.32372	42.78	40.7109	0.185783
0.32376	37.52	40.7554	0.184891
0.3238	42.59	40.8	0.184001
0.32384	37.52	40.8445	0.18311
0.32388	42.25	40.889	0.182221
0.32392	38.28	40.9334	0.181332
0.32396	42.06	40.9778	0.180443
0.324	39	41.0222	0.179556
0.32404	42.21	41.0666	0.178669
0.32408	39.19	41.1109	0.177782
0.32412	43.4	41.1552	0.176897
0.32416	39.53	41.1994	0.176012
0.3242	43.07	41.2436	0.175128
0.32424	40.72	41.2878	0.174244
0.32428	43.12	41.3319	0.173362
0.32432	41.25	41.376	0.17248
0.32436	42.83	41.42	0.1716
0.3244	42.45	41.464	0.17072
0.32444	41.63	41.508	0.169841
0.32448	43.59	41.5519	0.168963
0.32452	40.15	41.5957	0.168085
0.32456	43.93	41.6396	0.167209
0.3246	40.1	41.6833	0.166333
0.32464	44.17	41.7271	0.165459
0.32468	39	41.7708	0.164584
0.32472	44.22	41.8144	0.163711
0.32476	38.38	41.8581	0.162838
0.3248	43.88	41.9017	0.161966
0.32484	38.76	41.9452	0.161095
0.32488	43.5	41.9888	0.160225
0.32492	39.05	42.0323	0.159355
0.32496	43.35	42.0757	0.158485
0.325	39.24	42.1192	0.157616
0.32504	43.5	42.1626	0.156748
0.32508	39.86	42.206	0.155881
0.32512	43.69	42.2493	0.155014
0.32516	40.39	42.2926	0.154148
0.3252	43.83	42.3358	0.153283
0.32524	40.53	42.3791	0.152419
0.32528	44.36	42.4223	0.151555
0.32532	42.06	42.4654	0.150692
0.32536	44.03	42.5085	0.14983
0.3254	42.3	42.5515	0.148969
0.32544	43.64	42.5945	0.148109
0.32548	43.26	42.6375	0.14725
0.32552	43.35	42.6804	0.146392
0.32556	44.46	42.7233	0.145534
0.3256	42.21	42.7661	0.144678
0.32564	44.89	42.8089	0.143823
0.32568	40.77	42.8516	0.142968
0.32572	45.89	42.8943	0.142115
0.32576	39.96	42.9369	0.141262
0.3258	45.51	42.9795	0.14041
0.32584	39	43.022	0.139559
0.32588	45.27	43.0645	0.138709
0.32592	40	43.107	0.13786
0.32596	44.5	43.1494	0.137011
0.326	40.24	43.1918	0.136164
0.32604	44.7	43.2342	0.135317
0.32608	40.58	43.2765	0.134471
0.32612	44.31	43.3187	0.133625
0.32616	41.15	43.3609	0.132781
0.3262	45.17	43.4031	0.131938
0.32624	41.92	43.4452	0.131095
0.32628	45.37	43.4873	0.130254
0.32632	41.87	43.5293	0.129413
0.32636	45.65	43.5713	0.128574
0.3264	42.78	43.6132	0.127735
0.32644	45.75	43.6551	0.126898
0.32648	43.45	43.6969	0.126062
0.32652	45.22	43.7387	0.125227
0.32656	44.79	43.7804	0.124393
0.3266	44.26	43.822	0.12356
0.32664	45.84	43.8636	0.122728
0.32668	42.78	43.9051	0.121898
0.32672	46.66	43.9466	0.121068
0.32676	42.54	43.988	0.12024
0.3268	46.75	44.0294	0.119413
0.32684	41.54	44.0707	0.118587
0.32688	46.85	44.1119	0.117761
0.32692	40.96	44.1532	0.116937
0.32696	46.66	44.1943	0.116113
0.327	40.91	44.2355	0.115291
0.32704	45.99	44.2765	0.114469
0.32708	41.44	44.3176	0.113648
0.32712	45.51	44.3586	0.112828
0.32716	41.63	44.3996	0.112009
0.3272	45.6	44.4405	0.11119
0.32724	42.4	44.4814	0.110372
0.32728	45.89	44.5222	0.109555
0.32732	42.88	44.5631	0.108739
0.32736	46.08	44.6038	0.107923
0.3274	43.07	44.6446	0.107108
0.32744	46.61	44.6853	0.106294
0.32748	44.03	44.726	0.105481
0.32752	46.8	44.7666	0.104669
0.32756	44.7	44.8072	0.103857
0.3276	46.42	44.8477	0.103046
0.32764	45.75	44.8882	0.102236
0.32768	45.41	44.9287	0.101427
0.32772	46.51	44.9691	0.100618
0.32776	44.5	45.0095	0.09981
0.3278	47.47	45.0499	0.0990027
0.32784	43.02	45.0902	0.098196
0.32788	47.95	45.1305	0.0973898
0.32792	42.54	45.1708	0.0965842
0.32796	47.9	45.2111	0.095779
0.328	41.58	45.2513	0.0949742
0.32804	47.38	45.2915	0.0941697
0.32808	42.16	45.3317	0.0933655
0.32812	46.9	45.3719	0.0925615
0.32816	42.4	45.4121	0.0917577
0.3282	46.9	45.4523	0.0909541
0.32824	42.73	45.4925	0.0901507
0.32828	46.8	45.5326	0.0893473
0.32832	43.16	45.5728	0.0885441
0.32836	47.09	45.613	0.087741
0.3284	43.64	45.6531	0.0869379
0.32844	47.28	45.6933	0.0861349
0.32848	43.98	45.7334	0.0853321
0.32852	47.57	45.7735	0.0845293
0.32856	44.84	45.8137	0.0837266
0.3286	47.23	45.8538	0.0829239
0.32864	45.6	45.8939	0.0821214
0.32868	47.52	45.9341	0.081319
0.32872	46.37	45.9742	0.0805166
0.32876	46.32	46.0143	0.0797142
0.3288	47.38	46.0544	0.0789119
0.32884	45.8	46.0945	0.0781096
0.32888	48.29	46.1346	0.0773072
0.32892	44.12	46.1748	0.0765048
0.32896	48.91	46.2149	0.0757022
0.329	43.35	46.255	0.0748995
0.32904	48.76	46.2952	0.0740966
0.32908	42.59	46.3353	0.0732935
0.32912	48.38	46.3755	0.0724901
0.32916	42.68	46.4157	0.0716863
0.3292	47.9	46.4559	0.0708822
0.32924	43.12	46.4961	0.0700777
0.32928	48.09	46.5364	0.0692729
0.32932	43.4	46.5766	0.0684677
0.32936	47.57	46.6169	0.0676621
0.3294	44.46	46.6572	0.0668562
0.32944	47.95	46.6975	0.0660499
0.32948	44.65	46.7378	0.0652433
0.32952	48.76	46.7782	0.0644364
0.32956	45.51	46.8185	0.0636292
0.3296	48.52	46.8589	0.0628218
0.32964	46.04	46.8993	0.0620141
0.32968	49	46.9397	0.0612063
0.32972	46.8	46.9801	0.0603983
0.32976	48.76	47.0205	0.0595902
0.3298	47.33	47.0609	0.0587819
0.32984	47.38	47.1013	0.0579734
0.32988	48.81	47.1418	0.0571648
0.32992	46.66	47.1822	0.056356
0.32996	49.63	47.2227	0.055547
0.33	45.22	47.2631	0.0547377
0.33004	50.06	47.3036	0.0539283
0.33008	44.31	47.3441	0.0531186
0.33012	49.72	47.3846	0.0523086
0.33016	44.17	47.4251	0.0514982
0.3302	49.15	47.4656	0.0506875
0.33024	44.17	47.5062	0.0498764
0.33028	48.76	47.5468	0.0490649
0.33032	43.93	47.5873	0.0482531
0.33036	49.05	47.628	0.0474408
0.3304	44.55	47.6686	0.0466282
0.33044	48.86	47.7092	0.0458152
0.33048	45.08	47.7499	0.0450018
0.33052	48.81	47.7906	0.0441882
0.33056	45.8	47.8313	0.0433743
0.3306	49.82	47.872	0.0425602
0.33064	46.18	47.9127	0.0417459
0.33068	49.72	47.9534	0.0409315
0.33072	47.18	47.9941	0.040117
0.33076	50.25	48.0349	0.0393025
0.3308	47.95	48.0756	0.038488
0.33084	49.34	48.1163	0.0376735
0.33088	49.39	48.157	0.0368592
0.33092	48.48	48.1978	0.0360449
0.33096	49.82	48.2385	0.0352307
0.331	47.57	48.2792	0.0344166
0.33104	51.16	48.3199	0.0336026
0.33108	46.32	48.3606	0.0327887
0.33112	51.11	48.4013	0.0319749
0.33116	45.7	48.4419	0.0311612
0.3312	51.11	48.4826	0.0303475
0.33124	45.27	48.5233	0.0295339
0.33128	50.82	48.564	0.0287204
0.33132	44.98	48.6047	0.0279068
0.33136	50.3	48.6453	0.0270933
0.3314	45.41	48.686	0.0262797
0.33144	50.3	48.7267	0.0254662
0.33148	46.32	48.7674	0.0246528
0.33152	49.86	48.808	0.0238394
0.33156	46.47	48.8487	0.023026
0.3316	50.39	48.8894	0.0222128
0.33164	46.71	48.93	0.0213997
0.33168	50.92	48.9707	0.0205868
0.33172	47.62	49.0113	0.0197742
0.33176	51.25	49.0519	0.0189617
0.3318	48.33	49.0925	0.0181496
0.33184	51.21	49.1331	0.0173378
0.33188	49.15	49.1737	0.0165264
0.33192	50.2	49.2142	0.0157153
0.33196	50.1	49.2548	0.0149045
0.332	49.58	49.2953	0.0140942
0.33204	51.49	49.3358	0.0132843
0.33208	48.38	49.3763	0.0124747
0.33212	51.59	49.4167	0.0116655
0.33216	47.57	49.4572	0.0108567
0.3322	52.35	49.4976	0.0100482
0.33224	46.47	49.538	0.00924005
0.33228	52.21	49.5784	0.00843215
0.33232	46.42	49.6188	0.00762453
0.33236	51.73	49.6591	0.00681715
0.3324	46.27	49.6995	0.00600999
0.33244	51.21	49.7398	0.00520305
0.33248	46.37	49.7802	0.00439633
0.33252	51.4	49.8205	0.00358981
0.33256	47.33	49.8608	0.00278352
0.3326	51.35	49.9011	0.00197747
0.33264	48	49.9414	0.00117166
0.33268	51.21	49.9817	0.00036614
0.33272	47.76	50.022	-0.000439082
0.33276	51.59	50.0622	-0.00124397
0.3328	48.67	50.1024	-0.0020485
0.33284	51.92	50.1426	-0.00285264
0.33288	49.29	50.1828	-0.00365635
0.33292	52.02	50.223	-0.00445961
0.33296	50.39	50.2631	-0.00526238
0.333	51.54	50.3032	-0.00606466
0.33304	50.82	50.3433	-0.00686641
0.33308	50.44	50.3834	-0.00766765
0.33312	52.31	50.4234	-0.00846836
0.33316	49.91	50.4634	-0.00926854
0.3332	53.26	50.5034	-0.0100682
0.33324	48.96	50.5434	-0.0108674
0.33328	53.22	50.5833	-0.0116661
0.33332	47.81	50.6232	-0.0124643
0.33336	53.07	50.6631	-0.0132621
0.3334	47.66	50.703	-0.0140595
0.33344	52.78	50.7428	-0.0148565
0.33348	47.23	50.7827	-0.0156532
0.33352	52.64	50.8225	-0.0164495
0.33356	47.76	50.8623	-0.0172455
0.3336	52.07	50.9021	-0.0180412
0.33364	47.95	50.9418	-0.0188366
0.33368	52.5	50.9816	-0.0196316
0.33372	48.96	51.0213	-0.0204262
0.33376	52.5	51.061	-0.0212205
0.3338	49.15	51.1007	-0.0220144
0.33384	52.88	51.1404	-0.0228079
0.33388	49.86	51.18	-0.0236009
0.33392	53.12	51.2197	-0.0243934
0.33396	50.3	51.2593	-0.0251855
0.334	53.31	51.2988	-0.025977
0.33404	51.16	51.3384	-0.026768
0.33408	52.83	51.3779	-0.0275584
0.33412	51.97	51.4174	-0.0283483
0.33416	51.73	51.4569	-0.0291376
0.3342	53.65	51.4963	-0.0299264
0.33424	50.77	51.5357	-0.0307147
0.33428	54.27	51.5751	-0.0315024
0.33432	49.29	51.6145	-0.0322896
0.33436	54.32	51.6538	-0.0330764
0.3344	48.72	51.6931	-0.0338628
0.33444	54.22	51.7324	-0.0346488
0.33448	48.43	51.7717	-0.0354344
0.33452	53.69	51.811	-0.0362197
0.33456	48.86	51.8502	-0.0370047
0.3346	53.65	51.8895	-0.0377895
0.33464	48.81	51.9287	-0.0385739
0.33468	52.78	51.9679	-0.0393581
0.33472	49.24	52.0071	-0.040142
0.33476	53.45	52.0463	-0.0409257
0.3348	49.86	52.0855	-0.0417091
0.33484	53.65	52.1246	-0.0424921
0.33488	50.3	52.1637	-0.0432749
0.33492	53.5	52.2029	-0.0440574
0.33496	50.49	52.242	-0.0448394
0.335	54.7	52.2811	-0.0456211
0.33504	51.11	52.3201	-0.0464024
0.33508	54.65	52.3592	-0.0471833
0.33512	52.02	52.3982	-0.0479636
0.33516	53.74	52.4372	-0.0487436
0.3352	53.31	52.4762	-0.049523
0.33524	52.93	52.5151	-0.050302
0.33528	54.27	52.554	-0.0510806
0.33532	51.78	52.5929	-0.0518586
0.33536	54.94	52.6318	-0.0526363
0.3354	51.11	52.6707	-0.0534135
0.33544	55.51	52.7095	-0.0541904
0.33548	49.58	52.7483	-0.0549669
0.33552	55.47	52.7872	-0.0557431
0.33556	49.82	52.826	-0.0565191
0.3356	54.99	52.8647	-0.0572947
0.33564	49.77	52.9035	-0.0580702
0.33568	54.56	52.9423	-0.0588455
0.33572	49.63	52.981	-0.0596206
0.33576	54.36	53.0198	-0.0603955
0.3358	50.68	53.0585	-0.0611703
0.33584	54.03	53.0972	-0.0619449
0.33588	50.87	53.136	-0.0627194
0.33592	54.36	53.1747	-0.0634937
0.33596	51.11	53.2134	-0.0642678
0.336	54.89	53.2521	-0.0650417
0.33604	52.07	53.2908	-0.0658153
0.33608	55.42	53.3294	-0.0665888
0.33612	52.55	53.3681	-0.0673619
0.33616	54.89	53.4067	-0.0681348
0.3362	53.26	53.4454	-0.0689073
0.33624	54.7	53.484	-0.0696796
0.33628	54.32	53.5226	-0.0704516
0.33632	53.93	53.5612	-0.0712232
0.33636	55.42	53.5997	-0.0719946
0.3364	52.83	53.6383	-0.0727657
0.33644	56.04	53.6768	-0.0735365
0.33648	51.68	53.7154	-0.0743071
0.33652	56.18	53.7539	-0.0750775
0.33656	50.87	53.7924	-0.0758477
0.3366	56.23	53.8309	-0.0766178
0.33664	50.77	53.8694	-0.0773877
0.33668	55.75	53.9079	-0.0781576
0.33672	50.97	53.9464	-0.0789275
0.33676	55.61	53.9849	-0.0796973
0.3368	50.82	54.0234	-0.0804671
0.33684	55.08	54.0618	-0.0812368
0.33688	51.3	54.1003	-0.0820066
0.33692	55.42	54.1388	-0.0827763
0.33696	52.11	54.1773	-0.083546
0.337	55.51	54.2158	-0.0843157
0.33704	52.21	54.2543	-0.0850852
0.33708	56.14	54.2927	-0.0858547
0.33712	52.78	54.3312	-0.0866241
0.33716	56.47	54.3697	-0.0873933
0.3372	53.89	54.4081	-0.0881623
0.33724	56.52	54.4466	-0.0889311
0.33728	54.32	54.485	-0.0896997
0.33732	55.27	54.5234	-0.0904681
0.33736	55.32	54.5618	-0.0912363
0.3374	54.89	54.6002	-0.0920043
0.33744	56.57	54.6386	-0.0927721
0.33748	53.26	54.677	-0.0935396
0.33752	57.43	54.7153	-0.094307
0.33756	52.21	54.7537	-0.0950742
0.3376	57.43	54.7921	-0.0958413
0.33764	51.92	54.8304	-0.0966083
0.33768	57.14	54.8688	-0.0973752
0.33772	51.64	54.9071	-0.0981421
0.33776	57.09	54.9454	-0.0989089
0.3378	51.83	54.9838	-0.0996757
0.33784	56.23	55.0221	-0.100442
0.33788	52.07	55.0605	-0.101209
0.33792	56.09	55.0988	-0.101976
0.33796	52.35	55.1371	-0.102743
0.338	56.09	55.1755	-0.103509
0.33804	52.98	55.2138	-0.104276
0.33808	56.61	55.2521	-0.105043
0.33812	53.55	55.2905	-0.105809
0.33816	57.33	55.3288	-0.106576
0.3382	53.74	55.3671	-0.107342
0.33824	57.62	55.4054	-0.108108
0.33828	54.94	55.4437	-0.108873
0.33832	57.24	55.4819	-0.109639
0.33836	55.56	55.5202	-0.110404
0.3384	56.42	55.5584	-0.111168
0.33844	56.71	55.5966	-0.111933
0.33848	55.75	55.6348	-0.112697
0.33852	57.67	55.673	-0.11346
0.33856	54.99	55.7112	-0.114223
0.3386	58.19	55.7493	-0.114986
0.33864	53.84	55.7875	-0.115749
0.33868	58.43	55.8256	-0.116511
0.33872	53.26	55.8637	-0.117273
0.33876	58.05	55.9018	-0.118035
0.3388	52.35	55.9398	-0.118797
0.33884	58	55.9779	-0.119558
0.33888	52.59	56.016	-0.12032
0.33892	57.52	56.054	-0.121081
0.33896	53.12	56.0921	-0.121842
0.339	56.9	56.1301	-0.122602
0.33904	53.5	56.1681	-0.123363
0.33908	57.38	56.2062	-0.124123
0.33912	53.55	56.2442	-0.124883
0.33916	58.34	56.2822	-0.125643
0.3392	54.41	56.3201	-0.126403
0.33924	58.48	56.3581	-0.127162
0.33928	54.89	56.3961	-0.127921
0.33932	58.48	56.434	-0.12868
0.33936	56.04	56.4719	-0.129438
0.3394	58.62	56.5098	-0.130195
0.33944	56.37	56.5476	-0.130952
0.33948	57.86	56.5855	-0.131709
0.33952	57	56.6233	-0.132465
0.33956	56.71	56.661	-0.133221
0.3396	58.91	56.6988	-0.133976
0.33964	55.47	56.7365	-0.134731
0.33968	59.06	56.7742	-0.135485
0.33972	54.51	56.8119	-0.136239
0.33976	59.96	56.8496	-0.136992
0.3398	54.17	56.8872	-0.137745
0.33984	58.96	56.9249	-0.138497
0.33988	53.93	56.9625	-0.139249
0.33992	58.72	57	-0.140001
0.33996	54.13	57.0376	-0.140752
0.34	58.58	57.0752	-0.141503
0.34004	54.27	57.1127	-0.142254
0.34008	58.1	57.1502	-0.143004
0.34012	54.75	57.1877	-0.143754
0.34016	58.43	57.2252	-0.144504
0.3402	54.84	57.2626	-0.145253
0.34024	58.86	57.3001	-0.146002
0.34028	55.32	57.3375	-0.14675
0.34032	59.1	57.3749	-0.147498
0.34036	56.28	57.4123	-0.148245
0.3404	59.06	57.4496	-0.148992
0.34044	56.95	57.4869	-0.149739
0.34048	59.73	57.5242	-0.150484
0.34052	57.33	57.5615	-0.151229
0.34056	59.2	57.5987	-0.151974
0.3406	58.29	57.6359	-0.152718
0.34064	57.67	57.673	-0.153461
0.34068	59.44	57.7102	-0.154203
0.34072	56.76	57.7473	-0.154945
0.34076	60.35	57.7843	-0.155687
0.3408	55.66	57.8214	-0.156427
0.34084	60.92	57.8584	-0.157168
0.34088	54.99	57.8954	-0.157907
0.34092	60.16	57.9323	-0.158646
0.34096	54.22	57.9692	-0.159385
0.341	60.16	58.0062	-0.160123
0.34104	54.27	58.043	-0.160861
0.34108	59.63	58.0799	-0.161598
0.34112	54.94	58.1167	-0.162335
0.34116	59.1	58.1536	-0.163071
0.3412	55.42	58.1904	-0.163807
0.34124	59.15	58.2271	-0.164543
0.34128	56.57	58.2639	-0.165278
0.34132	59.87	58.3006	-0.166012
0.34136	56.37	58.3373	-0.166746
0.3414	60.25	58.374	-0.167479
0.34144	56.81	58.4106	-0.168212
0.34148	60.83	58.4472	-0.168943
0.34152	57.28	58.4837	-0.169675
0.34156	60.35	58.5202	-0.170405
0.3416	58.48	58.5567	-0.171134
0.34164	59.49	58.5932	-0.171863
0.34168	59.82	58.6296	-0.172591
0.34172	59.15	58.6659	-0.173318
0.34176	60.97	58.7022	-0.174045
0.3418	57.91	58.7385	-0.17477
0.34184	61.45	58.7747	-0.175495
0.34188	56.37	58.8109	-0.176218
0.34192	61.45	58.8471	-0.176941
0.34196	56.42	58.8832	-0.177664
0.342	61.11	58.9193	-0.178385
0.34204	55.94	58.9553	-0.179106
0.34208	60.97	58.9913	-0.179826
0.34212	55.9	59.0273	-0.180545
0.34216	60.54	59.0632	-0.181264
0.3422	55.61	59.0991	-0.181982
0.34224	60.54	59.135	-0.1827
0.34228	56.47	59.1708	-0.183416
0.34232	60.83	59.2066	-0.184132
0.34236	56.85	59.2424	-0.184848
0.3424	60.35	59.2781	-0.185563
0.34244	57.19	59.3138	-0.186276
0.34248	61.45	59.3495	-0.18699
0.34252	58	59.3851	-0.187702
0.34256	61.59	59.4207	-0.188413
0.3426	58.67	59.4562	-0.189124
0.34264	61.5	59.4917	-0.189834
0.34268	59.73	59.5271	-0.190543
0.34272	60.78	59.5625	-0.19125
0.34276	60.59	59.5979	-0.191957
0.3428	60.01	59.6332	-0.192663
0.34284	61.31	59.6684	-0.193368
0.34288	58.58	59.7036	-0.194073
0.34292	62.41	59.7388	-0.194776
0.34296	57.43	59.7739	-0.195478
0.343	62.6	59.809	-0.19618
0.34304	56.81	59.844	-0.196881
0.34308	62.36	59.879	-0.197581
0.34312	56.57	59.914	-0.19828
0.34316	61.83	59.9489	-0.198978
0.3432	56.81	59.9838	-0.199676
0.34324	61.45	60.0187	-0.200373
0.34328	57.52	60.0535	-0.20107
0.34332	61.4	60.0883	-0.201765
0.34336	57.57	60.123	-0.202461
0.3434	61.4	60.1577	-0.203155
0.34344	57.81	60.1924	-0.203849
0.34348	61.69	60.2271	-0.204542
0.34352	58.39	60.2617	-0.205234
0.34356	62.74	60.2963	-0.205925
0.3436	58.62	60.3308	-0.206616
0.34364	62.69	60.3653	-0.207306
0.34368	59.68	60.3998	-0.207995
0.34372	62.12	60.4342	-0.208683
0.34376	60.59	60.4685	-0.209371
0.3438	61.69	60.5029	-0.210058
0.34384	61.78	60.5372	-0.210743
0.34388	60.78	60.5714	-0.211428
0.34392	62.6	60.6056	-0.212113
0.34396	59.87	60.6398	-0.212796
0.344	63.12	60.6739	-0.213479
0.34404	58.43	60.708	-0.214161
0.34408	63.75	60.7421	-0.214842
0.34412	57.76	60.7761	-0.215523
0.34416	63.55	60.8101	-0.216203
0.3442	57.48	60.8441	-0.216882
0.34424	62.88	60.8781	-0.217561
0.34428	57.81	60.912	-0.21824
0.34432	62.26	60.9459	-0.218918
0.34436	57.86	60.9798	-0.219596
0.3444	62.31	61.0137	-0.220274
0.34444	58.58	61.0476	-0.220951
0.34448	62.31	61.0814	-0.221628
0.34452	58.86	61.1152	-0.222304
0.34456	62.21	61.149	-0.222981
0.3446	59.2	61.1828	-0.223657
0.34464	63.12	61.2166	-0.224332
0.34468	59.96	61.2504	-0.225007
0.34472	63.22	61.2841	-0.225682
0.34476	60.49	61.3178	-0.226357
0.3448	63.08	61.3515	-0.227031
0.34484	61.4	61.3852	-0.227704
0.34488	62.41	61.4189	-0.228378
0.34492	62.12	61.4525	-0.22905
0.34496	61.59	61.4862	-0.229723
0.345	63.32	61.5198	-0.230395
0.34504	60.35	61.5534	-0.231067
0.34508	64.08	61.587	-0.231739
0.34512	59.06	61.6205	-0.23241
0.34516	64.56	61.6541	-0.233082
0.3452	58.86	61.6876	-0.233753
0.34524	63.94	61.7212	-0.234424
0.34528	58.39	61.7547	-0.235095
0.34532	63.75	61.7883	-0.235765
0.34536	58.58	61.8218	-0.236436
0.3454	62.65	61.8554	-0.237107
0.34544	59.2	61.8889	-0.237778
0.34548	63.36	61.9224	-0.238449
0.34552	59.34	61.956	-0.239119
0.34556	63.27	61.9895	-0.23979
0.3456	59.58	62.0231	-0.240461
0.34564	63.75	62.0566	-0.241132
0.34568	60.25	62.0901	-0.241803
0.34572	63.84	62.1237	-0.242474
0.34576	60.92	62.1572	-0.243144
0.3458	64.08	62.1907	-0.243815
0.34584	61.5	62.2243	-0.244485
0.34588	63.7	62.2578	-0.245156
0.34592	62.93	62.2913	-0.245826
0.34596	63.46	62.3248	-0.246496
0.346	63.51	62.3583	-0.247166
0.34604	62.17	62.3918	-0.247836
0.34608	64.51	62.4253	-0.248506
0.34612	61.02	62.4588	-0.249175
0.34616	64.9	62.4923	-0.249845
0.3462	60.06	62.5257	-0.250515
0.34624	64.9	62.5592	-0.251184
0.34628	59.77	62.5927	-0.251854
0.34632	64.75	62.6262	-0.252524
0.34636	59.39	62.6597	-0.253194
0.3464	64.42	62.6932	-0.253864
0.34644	59.39	62.7267	-0.254534
0.34648	63.99	62.7602	-0.255204
0.34652	59.92	62.7937	-0.255875
0.34656	63.94	62.8273	-0.256545
0.3466	60.2	62.8608	-0.257216
0.34664	64.18	62.8944	-0.257887
0.34668	60.78	62.9279	-0.258558
0.34672	64.46	62.9615	-0.259229
0.34676	61.02	62.995	-0.259901
0.3468	64.7	63.0286	-0.260572
0.34684	61.69	63.0622	-0.261243
0.34688	65.04	63.0957	-0.261915
0.34692	62.45	63.1293	-0.262586
0.34696	64.66	63.1629	-0.263257
0.347	63.6	63.1964	-0.263928
0.34704	64.08	63.23	-0.264599
0.34708	64.42	63.2635	-0.26527
0.34712	62.79	63.297	-0.265941
0.34716	65.76	63.3306	-0.266611
0.3472	61.78	63.3641	-0.267282
0.34724	66.04	63.3976	-0.267952
0.34728	60.97	63.4311	-0.268623
0.34732	65.71	63.4646	-0.269293
0.34736	60.4	63.4981	-0.269963
0.3474	65.33	63.5317	-0.270633
0.34744	60.54	63.5652	-0.271303
0.34748	64.56	63.5987	-0.271973
0.34752	60.73	63.6322	-0.272643
0.34756	64.9	63.6657	-0.273313
0.3476	60.97	63.6992	-0.273983
0.34764	64.85	63.7326	-0.274653
0.34768	61.07	63.7661	-0.275323
0.34772	65.04	63.7996	-0.275992
0.34776	61.74	63.8331	-0.276662
0.3478	65.66	63.8666	-0.277331
0.34784	62.21	63.9	-0.278
0.34788	66.14	63.9334	-0.278669
0.34792	63.03	63.9668	-0.279337
0.34796	65.57	64.0002	-0.280005
0.348	63.99	64.0336	-0.280672
0.34804	65.28	64.067	-0.281339
0.34808	64.94	64.1003	-0.282006
0.34812	64.66	64.1336	-0.282672
0.34816	65.61	64.1669	-0.283337
0.3482	63.84	64.2001	-0.284002
0.34824	66.14	64.2333	-0.284666
0.34828	63.12	64.2665	-0.28533
0.34832	66.52	64.2997	-0.285993
0.34836	62.26	64.3328	-0.286656
0.3484	66.91	64.3659	-0.287318
0.34844	61.4	64.399	-0.28798
0.34848	67.05	64.432	-0.288641
0.34852	61.21	64.4651	-0.289301
0.34856	66.04	64.4981	-0.289961
0.3486	61.31	64.5311	-0.290621
0.34864	65.95	64.564	-0.29128
0.34868	61.88	64.5969	-0.291939
0.34872	66	64.6299	-0.292597
0.34876	62.31	64.6627	-0.293255
0.3488	65.85	64.6956	-0.293912
0.34884	62.88	64.7284	-0.294568
0.34888	66.43	64.7612	-0.295224
0.34892	63.41	64.794	-0.29588
0.34896	67	64.8267	-0.296534
0.349	63.99	64.8594	-0.297188
0.34904	66.91	64.8921	-0.297841
0.34908	64.75	64.9247	-0.298494
0.34912	66.52	64.9573	-0.299145
0.34916	65.61	64.9898	-0.299796
0.3492	65.95	65.0223	-0.300446
0.34924	66.62	65.0548	-0.301095
0.34928	64.46	65.0872	-0.301744
0.34932	67.38	65.1196	-0.302392
0.34936	63.32	65.1519	-0.303038
0.3494	67.62	65.1842	-0.303685
0.34944	62.6	65.2165	-0.30433
0.34948	67.43	65.2488	-0.304975
0.34952	61.93	65.281	-0.305619
0.34956	67.58	65.3132	-0.306263
0.3496	61.69	65.3453	-0.306906
0.34964	67	65.3774	-0.307549
0.34968	62.69	65.4095	-0.308191
0.34972	66.38	65.4416	-0.308832
0.34976	62.5	65.4736	-0.309473
0.3498	66.57	65.5057	-0.310113
0.34984	63.32	65.5376	-0.310753
0.34988	67.34	65.5696	-0.311392
0.34992	63.55	65.6015	-0.31203
0.34996	66.86	65.6334	-0.312668
0.35	64.18	65.6653	-0.313305
0.35004	67.91	65.6971	-0.313942
0.35008	64.9	65.7289	-0.314577
0.35012	68.29	65.7606	-0.315212
0.35016	65.37	65.7923	-0.315846
0.3502	66.62	65.824	-0.31648
0.35024	66.33	65.8556	-0.317112
0.35028	66.76	65.8872	-0.317743
0.35032	67.29	65.9187	-0.318374
0.35036	65.04	65.9502	-0.319004
0.3504	68.63	65.9817	-0.319633
0.35044	64.42	66.0131	-0.320261
0.35048	68.96	66.0444	-0.320889
0.35052	63.22	66.0758	-0.321516
0.35056	68.96	66.1071	-0.322142
0.3506	63.12	66.1383	-0.322767
0.35064	68.01	66.1696	-0.323391
0.35068	63.22	66.2008	-0.324015
0.35072	68.15	66.2319	-0.324639
0.35076	63.51	66.2631	-0.325261
0.3508	67.62	66.2942	-0.325884
0.35084	63.79	66.3253	-0.326505
0.35088	67.91	66.3563	-0.327126
0.35092	64.03	66.3873	-0.327746
0.35096	67.43	66.4183	-0.328366
0.351	64.37	66.4493	-0.328985
0.35104	68.25	66.4802	-0.329604
0.35108	64.8	66.5111	-0.330222
0.35112	68.49	66.542	-0.330839
0.35116	65.95	66.5728	-0.331456
0.3512	68.96	66.6036	-0.332072
0.35124	66.04	66.6343	-0.332687
0.35128	67.82	66.6651	-0.333302
0.35132	68.01	66.6958	-0.333915
0.35136	66.76	66.7264	-0.334529
0.3514	69.35	66.7571	-0.335141
0.35144	65.8	66.7877	-0.335753
0.35148	69.35	66.8182	-0.336365
0.35152	64.61	66.8488	-0.336975
0.35156	69.63	66.8793	-0.337586
0.3516	63.6	66.9098	-0.338196
0.35164	69.44	66.9403	-0.338805
0.35168	63.03	66.9707	-0.339414
0.35172	68.39	67.0011	-0.340023
0.35176	63.84	67.0316	-0.340631
0.3518	68.58	67.062	-0.341239
0.35184	63.79	67.0924	-0.341847
0.35188	68.05	67.1227	-0.342455
0.35192	64.61	67.1531	-0.343062
0.35196	68.01	67.1835	-0.343669
0.352	64.56	67.2138	-0.344276
0.35204	69.2	67.2441	-0.344882
0.35208	65.85	67.2744	-0.345489
0.35212	69.25	67.3047	-0.346094
0.35216	66.28	67.335	-0.3467
0.3522	69.63	67.3652	-0.347305
0.35224	66.14	67.3955	-0.347909
0.35228	68.77	67.4257	-0.348513
0.35232	67.14	67.4558	-0.349117
0.35236	69.25	67.486	-0.34972
0.3524	68.1	67.5161	-0.350323
0.35244	68.1	67.5462	-0.350925
0.35248	69.39	67.5763	-0.351527
0.35252	66.71	67.6064	-0.352128
0.35256	70.69	67.6364	-0.352729
0.3526	65.42	67.6665	-0.353329
0.35264	70.06	67.6965	-0.35393
0.35268	64.56	67.7265	-0.354529
0.35272	70.35	67.7564	-0.355129
0.35276	64.27	67.7864	-0.355728
0.3528	69.44	67.8164	-0.356327
0.35284	64.37	67.8463	-0.356926
0.35288	69.35	67.8762	-0.357525
0.35292	65.18	67.9062	-0.358123
0.35296	69.49	67.9361	-0.358722
0.353	65.61	67.966	-0.35932
0.35304	68.72	67.9959	-0.359918
0.35308	65.28	68.0258	-0.360516
0.35312	69.97	68.0557	-0.361113
0.35316	66.57	68.0855	-0.361711
0.3532	70.4	68.1154	-0.362308
0.35324	66.38	68.1452	-0.362905
0.35328	70.5	68.1751	-0.363501
0.35332	66.91	68.2049	-0.364098
0.35336	70.26	68.2347	-0.364693
0.3534	68.01	68.2644	-0.365289
0.35344	69.25	68.2942	-0.365884
0.35348	68.72	68.324	-0.366479
0.35352	67.72	68.3537	-0.367074
0.35356	70.26	68.3834	-0.367668
0.3536	67.58	68.4131	-0.368261
0.35364	70.93	68.4427	-0.368855
0.35368	66.47	68.4724	-0.369448
0.35372	71.5	68.502	-0.370041
0.35376	66.33	68.5317	-0.370634
0.3538	71.36	68.5613	-0.371226
0.35384	65.52	68.5909	-0.371818
0.35388	70.5	68.6205	-0.37241
0.35392	64.99	68.6501	-0.373002
0.35396	70.97	68.6797	-0.373594
0.354	65.28	68.7093	-0.374185
0.35404	70.06	68.7388	-0.374777
0.35408	66.33	68.7684	-0.375368
0.35412	70.35	68.798	-0.375959
0.35416	66.76	68.8275	-0.37655
0.3542	70.06	68.8571	-0.377141
0.35424	66.47	68.8866	-0.377732
0.35428	70.16	68.9162	-0.378323
0.35432	67.96	68.9457	-0.378914
0.35436	71.55	68.9752	-0.379504
0.3544	68.29	69.0047	-0.380094
0.35444	70.69	69.0342	-0.380684
0.35448	69.11	69.0637	-0.381274
0.35452	70.5	69.0932	-0.381864
0.35456	69.54	69.1226	-0.382453
0.3546	69.25	69.1521	-0.383042
0.35464	71.6	69.1815	-0.383631
0.35468	68.01	69.211	-0.384219
0.35472	71.88	69.2404	-0.384808
0.35476	65.85	69.2698	-0.385396
0.3548	72.36	69.2992	-0.385985
0.35484	65.71	69.3287	-0.386573
0.35488	72.22	69.3581	-0.387161
0.35492	65.47	69.3875	-0.38775
0.35496	71.41	69.4169	-0.388338
0.355	66.19	69.4463	-0.388927
0.35504	70.78	69.4758	-0.389515
0.35508	66.57	69.5052	-0.390104
0.35512	70.59	69.5346	-0.390692
0.35516	67	69.5641	-0.391281
0.3552	70.88	69.5935	-0.39187
0.35524	67.05	69.6229	-0.392459
0.35528	71.41	69.6524	-0.393048
0.35532	67.05	69.6818	-0.393636
0.35536	71.41	69.7113	-0.394225
0.3554	68.44	69.7407	-0.394814
0.35544	71.93	69.7701	-0.395403
0.35548	68.96	69.7996	-0.395991
0.35552	71.31	69.829	-0.396579
0.35556	70.45	69.8584	-0.397167
0.3556	70.16	69.8878	-0.397755
0.35564	71.02	69.9171	-0.398343
0.35568	69.59	69.9465	-0.39893
0.35572	72.27	69.9759	-0.399517
0.35576	69.3	70.0052	-0.400104
0.3558	72.51	70.0345	-0.40069
0.35584	68.15	70.0638	-0.401277
0.35588	72.51	70.0931	-0.401863
0.35592	66.71	70.1224	-0.402449
0.35596	72.79	70.1517	-0.403034
0.356	66.76	70.181	-0.40362
0.35604	72.31	70.2103	-0.404205
0.35608	66.71	70.2395	-0.40479
0.35612	71.36	70.2688	-0.405375
0.35616	67.34	70.298	-0.40596
0.3562	72.22	70.3272	-0.406545
0.35624	67.14	70.3565	-0.407129
0.35628	71.41	70.3857	-0.407713
0.35632	68.29	70.4149	-0.408297
0.35636	72.36	70.4441	-0.408881
0.3564	69.25	70.4732	-0.409464
0.35644	72.27	70.5024	-0.410047
0.35648	69.2	70.5315	-0.41063
0.35652	72.55	70.5606	-0.411212
0.35656	69.92	70.5897	-0.411794
0.3566	72.7	70.6187	-0.412375
0.35664	70.3	70.6478	-0.412955
0.35668	71.74	70.6768	-0.413535
0.35672	71.93	70.7057	-0.414115
0.35676	70.4	70.7347	-0.414694
0.3568	72.79	70.7636	-0.415272
0.35684	69.39	70.7925	-0.41585
0.35688	73.61	70.8213	-0.416427
0.35692	68.01	70.8502	-0.417004
0.35696	73.65	70.879	-0.41758
0.357	68.72	70.9078	-0.418155
0.35704	72.84	70.9365	-0.41873
0.35708	67.72	70.9652	-0.419305
0.35712	72.94	70.9939	-0.419879
0.35716	68.05	71.0226	-0.420452
0.3572	72.51	71.0513	-0.421025
0.35724	67.86	71.0799	-0.421598
0.35728	72.65	71.1085	-0.42217
0.35732	68.2	71.1371	-0.422742
0.35736	72.89	71.1657	-0.423313
0.3574	68.49	71.1942	-0.423884
0.35744	73.32	71.2227	-0.424454
0.35748	69.2	71.2512	-0.425023
0.35752	73.61	71.2796	-0.425592
0.35756	70.35	71.308	-0.42616
0.3576	73.18	71.3364	-0.426728
0.35764	71.79	71.3647	-0.427294
0.35768	72.7	71.393	-0.42786
0.35772	71.74	71.4213	-0.428425
0.35776	72.22	71.4495	-0.42899
0.3578	73.32	71.4777	-0.429553
0.35784	71.12	71.5058	-0.430116
0.35788	73.08	71.5339	-0.430678
0.35792	69.44	71.562	-0.43124
0.35796	74.32	71.59	-0.431801
0.358	68.72	71.618	-0.432361
0.35804	74.28	71.646	-0.43292
0.35808	68.77	71.6739	-0.433479
0.35812	73.56	71.7018	-0.434037
0.35816	68.63	71.7297	-0.434594
0.3582	73.46	71.7575	-0.435151
0.35824	68.49	71.7854	-0.435707
0.35828	73.13	71.8131	-0.436263
0.35832	69.63	71.8409	-0.436818
0.35836	73.18	71.8686	-0.437372
0.3584	69.54	71.8963	-0.437926
0.35844	73.51	71.924	-0.43848
0.35848	69.68	71.9516	-0.439032
0.35852	74.52	71.9792	-0.439584
0.35856	70.54	72.0068	-0.440135
0.3586	74.32	72.0343	-0.440686
0.35864	71.21	72.0618	-0.441235
0.35868	74.28	72.0892	-0.441784
0.35872	71.6	72.1166	-0.442332
0.35876	73.37	72.144	-0.44288
0.3588	72.6	72.1713	-0.443426
0.35884	73.03	72.1986	-0.443972
0.35888	73.61	72.2259	-0.444517
0.35892	71.21	72.2531	-0.445062
0.35896	74.52	72.2803	-0.445605
0.359	70.54	72.3074	-0.446148
0.35904	74.04	72.3345	-0.44669
0.35908	70.11	72.3616	-0.447232
0.35912	75.04	72.3887	-0.447773
0.35916	68.77	72.4157	-0.448314
0.3592	74.18	72.4427	-0.448853
0.35924	69.25	72.4696	-0.449393
0.35928	73.99	72.4966	-0.449932
0.35932	69.11	72.5235	-0.45047
0.35936	74.09	72.5504	-0.451008
0.3594	70.11	72.5773	-0.451545
0.35944	74.61	72.6041	-0.452082
0.35948	71.12	72.6309	-0.452618
0.35952	74.32	72.6577	-0.453154
0.35956	71.07	72.6845	-0.453689
0.3596	74.52	72.7112	-0.454224
0.35964	72.12	72.7379	-0.454758
0.35968	74.04	72.7646	-0.455292
0.35972	71.93	72.7912	-0.455824
0.35976	74.76	72.8178	-0.456357
0.3598	71.5	72.8444	-0.456888
0.35984	74.09	72.871	-0.457419
0.35988	74.09	72.8975	-0.45795
0.35992	73.18	72.924	-0.45848
0.35996	74.37	72.9505	-0.459009
0.36	72.41	72.9769	-0.459538
0.36004	75.28	73.0033	-0.460066
0.36008	70.97	73.0297	-0.460594
0.36012	74.95	73.0561	-0.461121
0.36016	70.64	73.0824	-0.461648
0.3602	74.71	73.1087	-0.462175
0.36024	70.26	73.135	-0.462701
0.36028	75.67	73.1613	-0.463227
0.36032	69.78	73.1876	-0.463752
0.36036	74.9	73.2139	-0.464277
0.3604	70.54	73.2401	-0.464802
0.36044	74.8	73.2664	-0.465327
0.36048	70.21	73.2926	-0.465852
0.36052	74.95	73.3188	-0.466376
0.36056	70.93	73.345	-0.4669
0.3606	74.04	73.3712	-0.467424
0.36064	70.5	73.3974	-0.467947
0.36068	75.38	73.4235	-0.46847
0.36072	72.31	73.4497	-0.468993
0.36076	75.9	73.4758	-0.469516
0.3608	72.6	73.5019	-0.470038
0.36084	75.52	73.528	-0.470559
0.36088	73.8	73.554	-0.471081
0.36092	74.09	73.5801	-0.471602
0.36096	75.38	73.6061	-0.472122
0.361	73.42	73.6321	-0.472642
0.36104	75.86	73.6581	-0.473162
0.36108	72.46	73.6841	-0.473681
0.36112	75.95	73.71	-0.4742
0.36116	71.21	73.7359	-0.474719
0.3612	76.48	73.7619	-0.475237
0.36124	70.59	73.7878	-0.475755
0.36128	76.24	73.8137	-0.476273
0.36132	70.73	73.8395	-0.476791
0.36136	75.33	73.8654	-0.477308
0.3614	71.55	73.8913	-0.477825
0.36144	74.95	73.9171	-0.478343
0.36148	70.73	73.943	-0.47886
0.36152	75.19	73.9688	-0.479376
0.36156	71.26	73.9947	-0.479893
0.3616	74.8	74.0205	-0.48041
0.36164	71.88	74.0463	-0.480926
0.36168	76.24	74.0721	-0.481442
0.36172	72.27	74.0979	-0.481958
0.36176	76.24	74.1237	-0.482474
0.3618	72.98	74.1495	-0.482989
0.36184	75.57	74.1752	-0.483505
0.36188	73.46	74.201	-0.484019
0.36192	75.9	74.2267	-0.484534
0.36196	73.75	74.2524	-0.485048
0.362	75.62	74.2781	-0.485562
0.36204	75.67	74.3037	-0.486075
0.36208	74.76	74.3294	-0.486588
0.36212	76.29	74.355	-0.487101
0.36216	72.94	74.3806	-0.487613
0.3622	77.87	74.4062	-0.488125
0.36224	71.98	74.4318	-0.488636
0.36228	76.77	74.4574	-0.489148
0.36232	71.55	74.4829	-0.489659
0.36236	76.77	74.5085	-0.490169
0.3624	71.79	74.534	-0.49068
0.36244	76.1	74.5595	-0.491191
0.36248	71.02	74.5851	-0.491701
0.36252	75.76	74.6106	-0.492211
0.36256	71.55	74.6361	-0.492721
0.3626	76.29	74.6616	-0.493231
0.36264	72.7	74.6871	-0.493741
0.36268	75.47	74.7126	-0.494251
0.36272	71.93	74.738	-0.494761
0.36276	76.38	74.7635	-0.49527
0.3628	72.55	74.789	-0.49578
0.36284	76.86	74.8144	-0.496289
0.36288	74.13	74.8399	-0.496798
0.36292	77.34	74.8653	-0.497306
0.36296	74.42	74.8907	-0.497815
0.363	76.38	74.9161	-0.498322
0.36304	75.14	74.9415	-0.49883
0.36308	76.72	74.9669	-0.499338
0.36312	76.34	74.9922	-0.499845
0.36316	75.33	75.0176	-0.500351
0.3632	76.81	75.0429	-0.500858
0.36324	73.56	75.0682	-0.501364
0.36328	77.53	75.0935	-0.50187
0.36332	72.98	75.1188	-0.502376
0.36336	77.72	75.1441	-0.502881
0.3634	72.51	75.1693	-0.503387
0.36344	77.29	75.1946	-0.503892
0.36348	71.88	75.2199	-0.504397
0.36352	77.29	75.2451	-0.504903
0.36356	71.74	75.2704	-0.505408
0.3636	77.01	75.2957	-0.505914
0.36364	72.79	75.321	-0.506419
0.36368	76.72	75.3463	-0.506925
0.36372	73.08	75.3715	-0.507431
0.36376	76.19	75.3968	-0.507937
0.3638	73.32	75.4221	-0.508443
0.36384	77.2	75.4474	-0.508949
0.36388	74.37	75.4728	-0.509455
0.36392	77.87	75.4981	-0.509962
0.36396	73.32	75.5234	-0.510468
0.364	77.63	75.5487	-0.510974
0.36404	75.09	75.5741	-0.511481
0.36408	77.68	75.5994	-0.511988
0.36412	75.19	75.6247	-0.512494
0.36416	76.86	75.6501	-0.513001
0.3642	77.29	75.6754	-0.513508
0.36424	75.14	75.7008	-0.514016
0.36428	77.92	75.7261	-0.514523
0.36432	74.37	75.7515	-0.515031
0.36436	78.01	75.7769	-0.515538
0.3644	72.65	75.8023	-0.516047
0.36444	78.82	75.8278	-0.516555
0.36448	72.7	75.8532	-0.517064
0.36452	78.3	75.8787	-0.517574
0.36456	72.46	75.9042	-0.518084
0.3646	77.48	75.9297	-0.518594
0.36464	73.03	75.9553	-0.519105
0.36468	77.01	75.9809	-0.519617
0.36472	73.03	76.0065	-0.52013
0.36476	76.72	76.0321	-0.520643
0.3648	73.56	76.0578	-0.521156
0.36484	77.58	76.0835	-0.52167
0.36488	73.27	76.1093	-0.522185
0.36492	77.63	76.135	-0.522701
0.36496	74.18	76.1609	-0.523217
0.365	77.63	76.1867	-0.523734
0.36504	75	76.2126	-0.524251
0.36508	78.11	76.2384	-0.524769
0.36512	74.61	76.2644	-0.525287
0.36516	78.2	76.2903	-0.525806
0.3652	76.62	76.3163	-0.526325
0.36524	77.96	76.3422	-0.526845
0.36528	77.2	76.3683	-0.527365
0.36532	76.14	76.3943	-0.527886
0.36536	78.39	76.4203	-0.528407
0.3654	74.56	76.4464	-0.528928
0.36544	78.44	76.4725	-0.52945
0.36548	74.04	76.4986	-0.529973
0.36552	79.4	76.5248	-0.530495
0.36556	73.51	76.5509	-0.531019
0.3656	79.06	76.5771	-0.531543
0.36564	72.55	76.6034	-0.532067
0.36568	78.39	76.6296	-0.532592
0.36572	73.32	76.6559	-0.533118
0.36576	77.87	76.6822	-0.533644
0.3658	72.98	76.7085	-0.534171
0.36584	77.63	76.7349	-0.534698
0.36588	73.8	76.7613	-0.535226
0.36592	78.3	76.7877	-0.535754
0.36596	74.9	76.8141	-0.536282
0.366	78.54	76.8406	-0.536811
0.36604	75.04	76.867	-0.53734
0.36608	78.59	76.8935	-0.537869
0.36612	75.9	76.9199	-0.538399
0.36616	78.73	76.9464	-0.538928
0.3662	76.57	76.9729	-0.539458
0.36624	79.26	76.9994	-0.539987
0.36628	77.1	77.0258	-0.540517
0.36632	78.35	77.0523	-0.541046
0.36636	78.01	77.0788	-0.541576
0.3664	77.01	77.1052	-0.542105
0.36644	79.16	77.1317	-0.542634
0.36648	76	77.1581	-0.543163
0.36652	79.88	77.1846	-0.543692
0.36656	74.42	77.211	-0.54422
0.3666	79.83	77.2374	-0.544749
0.36664	74.28	77.2638	-0.545277
0.36668	79.59	77.2903	-0.545805
0.36672	74.37	77.3167	-0.546333
0.36676	79.11	77.3431	-0.546861
0.3668	73.99	77.3694	-0.547389
0.36684	78.82	77.3958	-0.547916
0.36688	74.61	77.4222	-0.548444
0.36692	79.02	77.4485	-0.548971
0.36696	75.52	77.4749	-0.549498
0.367	78.49	77.5012	-0.550025
0.36704	75.71	77.5276	-0.550551
0.36708	79.93	77.5539	-0.551077
0.36712	76.34	77.5801	-0.551603
0.36716	79.45	77.6064	-0.552128
0.3672	76.62	77.6327	-0.552653
0.36724	79.73	77.6589	-0.553178
0.36728	77.01	77.6851	-0.553701
0.36732	79.4	77.7112	-0.554225
0.36736	78.73	77.7374	-0.554748
0.3674	78.97	77.7635	-0.55527
0.36744	79.06	77.7896	-0.555792
0.36748	78.2	77.8156	-0.556313
0.36752	78.92	77.8417	-0.556833
0.36756	76	77.8677	-0.557354
0.3676	80.6	77.8937	-0.557873
0.36764	75.28	77.9196	-0.558393
0.36768	80.98	77.9456	-0.558911
0.36772	74.8	77.9715	-0.55943
0.36776	79.83	77.9974	-0.559948
0.3678	74.95	78.0233	-0.560466
0.36784	80.55	78.0491	-0.560983
0.36788	74.76	78.075	-0.5615
[truncated: 22,803 more rows]

## Sheet: Sheet2
0.52816	51.64	49.984	0.000319331	0.000248466
0.5282	47.04	49.9446	0.0011083	0.000712771
0.52824	51.35	49.9051	0.00189819	0.001189
0.52828	47.04	49.8655	0.00268902	0.0016773
0.52832	51.4	49.826	0.0034808	0.00217782
0.52836	47.42	49.7863	0.00427355	0.0026907
0.5284	51.54	49.7466	0.00506731	0.00321609
0.52844	48.24	49.7069	0.00586211	0.00375413
0.52848	51.4	49.6671	0.00665797	0.00430496
0.52852	48.81	49.6273	0.00745492	0.00486872
0.52856	51.73	49.5873	0.008253	0.00544555
0.5286	49.63	49.5474	0.00905222	0.0060356
0.52864	51.16	49.5074	0.00985261	0.00663901
0.52868	50.3	49.4673	0.0106542	0.00725592
0.52872	49.77	49.4272	0.0114569	0.00788649
0.52876	50.82	49.387	0.0122608	0.00853084
0.5288	48.52	49.3467	0.0130658	0.00918911
0.52884	51.92	49.3064	0.013872	0.00986143
0.52888	48.24	49.266	0.0146792	0.0105479
0.52892	51.88	49.2256	0.0154876	0.0112488
0.52896	46.23	49.1852	0.016297	0.011964
0.529	52.11	49.1446	0.0171074	0.0126939
0.52904	45.99	49.1041	0.0179188	0.0134384
0.52908	50.92	49.0634	0.0187311	0.0141977
0.52912	45.94	49.0228	0.0195443	0.014972
0.52916	50.63	48.9821	0.0203583	0.0157613
0.5292	46.04	48.9413	0.0211732	0.0165658
0.52924	49.96	48.9006	0.021989	0.0173856
0.52928	46.27	48.8597	0.0228055	0.0182207
0.52932	50.2	48.8189	0.0236229	0.0190714
0.52936	46.32	48.7779	0.024441	0.0199376
0.5294	50.3	48.737	0.02526	0.0208196
0.52944	46.23	48.696	0.0260797	0.0217174
0.52948	50.97	48.655	0.0269003	0.022631
0.52952	46.94	48.6139	0.0277218	0.0235606
0.52956	50.68	48.5728	0.028544	0.0245063
0.5296	47.9	48.5316	0.0293672	0.0254682
0.52964	49.96	48.4904	0.0301912	0.0264463
0.52968	48.24	48.4492	0.0310161	0.0274407
0.52972	49.63	48.4079	0.0318418	0.0284515
0.52976	49.43	48.3666	0.0326684	0.0294788
0.5298	48.81	48.3252	0.0334959	0.0305226
0.52984	49.72	48.2838	0.0343242	0.0315829
0.52988	47.42	48.2423	0.0351532	0.0326599
0.52992	50.68	48.2008	0.0359831	0.0337536
0.52996	46.27	48.1593	0.0368137	0.034864
0.53	50.49	48.1178	0.0376449	0.0359912
0.53004	45.08	48.0762	0.0384768	0.0371352
0.53008	50.3	48.0345	0.0393093	0.038296
0.53012	45.08	47.9929	0.0401424	0.0394736
0.53016	50.06	47.9512	0.0409759	0.0406681
0.5302	44.46	47.9095	0.04181	0.0418795
0.53024	49.63	47.8678	0.0426445	0.0431077
0.53028	44.7	47.826	0.0434795	0.0443527
0.53032	49.34	47.7843	0.0443148	0.0456146
0.53036	44.79	47.7425	0.0451506	0.0468932
0.5304	48.76	47.7007	0.0459867	0.0481886
0.53044	45.32	47.6588	0.0468233	0.0495007
0.53048	48.86	47.617	0.0476602	0.0508295
0.53052	46.04	47.5751	0.0484976	0.0521748
0.53056	48.76	47.5332	0.0493353	0.0535366
0.5306	46.42	47.4913	0.0501735	0.0549149
0.53064	49.29	47.4494	0.0510122	0.0563095
0.53068	46.32	47.4074	0.0518513	0.0577204
0.53072	49.86	47.3655	0.0526909	0.0591474
0.53076	47.42	47.3235	0.0535309	0.0605904
0.5308	48.67	47.2814	0.0543714	0.0620494
0.53084	47.66	47.2394	0.0552124	0.063524
0.53088	48.05	47.1973	0.0560539	0.0650143
0.53092	49.15	47.1552	0.0568957	0.0665201
0.53096	45.75	47.1131	0.057738	0.0680411
0.531	49.29	47.071	0.0585806	0.0695771
0.53104	45.27	47.0288	0.0594235	0.0711281
0.53108	49.53	46.9867	0.0602667	0.0726938
0.53112	44.12	46.9445	0.0611101	0.0742739
0.53116	49.39	46.9023	0.0619537	0.0758681
0.5312	43.79	46.8601	0.0627974	0.0774764
0.53124	48.86	46.8179	0.0636412	0.0790983
0.53128	43.35	46.7757	0.0644851	0.0807336
0.53132	48.33	46.7336	0.065329	0.082382
0.53136	43.83	46.6914	0.0661728	0.0840432
0.5314	47.85	46.6492	0.0670166	0.0857169
0.53144	44.07	46.607	0.0678604	0.0874026
0.53148	47.52	46.5648	0.0687041	0.0891001
0.53152	44.26	46.5226	0.0695477	0.0908089
0.53156	48.14	46.4804	0.0703912	0.0925286
0.5316	44.12	46.4383	0.0712347	0.0942589
0.53164	48.19	46.3961	0.0720781	0.0959991
0.53168	44.6	46.3539	0.0729214	0.097749
0.53172	48.24	46.3118	0.0737647	0.099508
0.53176	46.27	46.2696	0.0746079	0.101276
0.5318	47.9	46.2274	0.0754511	0.103051
0.53184	46.32	46.1853	0.0762943	0.104834
0.53188	47.62	46.1431	0.0771374	0.106624
0.53192	47.23	46.101	0.0779805	0.10842
0.53196	46.42	46.0588	0.0788234	0.110222
0.532	47.66	46.0167	0.0796663	0.112029
0.53204	44.98	45.9746	0.080509	0.11384
0.53208	48.76	45.9324	0.0813514	0.115655
0.53212	43.88	45.8903	0.0821937	0.117472
0.53216	48.43	45.8482	0.0830356	0.119291
0.5322	42.83	45.8061	0.0838772	0.121112
0.53224	48.48	45.7641	0.0847183	0.122933
0.53228	42.25	45.7221	0.085559	0.124753
0.53232	47.33	45.68	0.0863991	0.126572
0.53236	42.16	45.6381	0.0872386	0.128389
0.5324	47.18	45.5961	0.0880775	0.130202
0.53244	42.35	45.5542	0.0889158	0.132011
0.53248	46.66	45.5123	0.0897534	0.133815
0.53252	42.78	45.4705	0.0905903	0.135613
0.53256	46.66	45.4287	0.0914264	0.137402
0.5326	43.59	45.3869	0.0922618	0.139184
0.53264	46.51	45.3452	0.0930965	0.140955
0.53268	43.5	45.3035	0.0939305	0.142716
0.53272	46.99	45.2618	0.0947637	0.144464
0.53276	43.74	45.2202	0.0955963	0.146199
0.5328	47.14	45.1786	0.096428	0.147919
0.53284	44.36	45.137	0.0972591	0.149623
0.53288	47.09	45.0955	0.0980894	0.151309
0.53292	44.5	45.054	0.0989191	0.152976
0.53296	46.08	45.0126	0.0997479	0.154623
0.533	45.94	44.9712	0.100576	0.156248
0.53304	44.84	44.9298	0.101403	0.157849
0.53308	47.18	44.8885	0.10223	0.159425
0.53312	43.59	44.8472	0.103056	0.160974
0.53316	47.47	44.806	0.10388	0.162495
0.5332	42.35	44.7648	0.104704	0.163986
0.53324	47.04	44.7236	0.105527	0.165445
0.53328	41.49	44.6825	0.106349	0.16687
0.53332	47.33	44.6415	0.10717	0.16826
0.53336	41.15	44.6005	0.10799	0.169612
0.5334	46.42	44.5596	0.108808	0.170925
0.53344	41.15	44.5187	0.109626	0.172197
0.53348	45.84	44.4779	0.110442	0.173427
0.53352	41.2	44.4372	0.111257	0.174612
0.53356	45.13	44.3965	0.11207	0.175753
0.5336	41.58	44.3559	0.112883	0.176848
0.53364	45.8	44.3153	0.113694	0.177897
0.53368	42.21	44.2748	0.114504	0.1789
0.53372	45.89	44.2344	0.115313	0.179856
0.53376	42.45	44.194	0.11612	0.180767
0.5338	45.89	44.1537	0.116927	0.181633
0.53384	42.64	44.1134	0.117732	0.182456
0.53388	45.56	44.0732	0.118536	0.183237
0.53392	43.45	44.0331	0.119339	0.183977
0.53396	45.56	43.993	0.12014	0.184678
0.534	44.12	43.9529	0.120941	0.185343
0.53404	45.03	43.913	0.121741	0.185972
0.53408	44.7	43.8731	0.122539	0.186568
0.53412	44.31	43.8332	0.123336	0.187134
0.53416	45.56	43.7934	0.124132	0.187671
0.5342	42.68	43.7536	0.124927	0.188181
0.53424	45.89	43.714	0.125721	0.188667
0.53428	41.44	43.6743	0.126513	0.18913
0.53432	45.84	43.6348	0.127305	0.189574
0.53436	40.24	43.5953	0.128095	0.189999
0.5344	46.08	43.5558	0.128883	0.190408
0.53444	40.29	43.5165	0.129671	0.190802
0.53448	45.75	43.4772	0.130457	0.191184
0.53452	40	43.4379	0.131241	0.191555
0.53456	44.79	43.3988	0.132024	0.191917
0.5346	39.91	43.3597	0.132806	0.19227
0.53464	44.55	43.3207	0.133586	0.192617
0.53468	41.06	43.2817	0.134365	0.192959
0.53472	44.07	43.2429	0.135143	0.193298
0.53476	41.63	43.204	0.135919	0.193633
0.5348	44.36	43.1653	0.136694	0.193967
0.53484	41.3	43.1266	0.137467	0.194301
0.53488	44.89	43.088	0.13824	0.194636
0.53492	41.63	43.0495	0.139011	0.194972
0.53496	44.93	43.011	0.13978	0.195312
0.535	42.11	42.9726	0.140549	0.195654
0.53504	44.7	42.9342	0.141316	0.196002
0.53508	42.92	42.8959	0.142082	0.196354
0.53512	43.59	42.8576	0.142847	0.196713
0.53516	44.12	42.8194	0.143611	0.197079
0.5352	42.64	42.7813	0.144374	0.197452
0.53524	44.84	42.7432	0.145135	0.197833
0.53528	41.87	42.7052	0.145896	0.198222
0.53532	44.98	42.6672	0.146655	0.198621
0.53536	40.05	42.6293	0.147413	0.19903
0.5354	45.46	42.5915	0.14817	0.199448
0.53544	39.72	42.5537	0.148925	0.199878
0.53548	44.89	42.516	0.14968	0.200318
0.53552	39.33	42.4784	0.150433	0.200769
0.53556	43.93	42.4408	0.151184	0.201232
0.5356	39.14	42.4033	0.151935	0.201706
0.53564	43.69	42.3658	0.152684	0.202192
0.53568	38.9	42.3284	0.153432	0.20269
0.53572	44.12	42.2911	0.154178	0.2032
0.53576	39.48	42.2539	0.154923	0.203722
0.5358	43.59	42.2167	0.155667	0.204255
0.53584	40.15	42.1795	0.156409	0.204799
0.53588	43.74	42.1425	0.15715	0.205355
0.53592	40.96	42.1055	0.15789	0.205922
0.53596	43.79	42.0685	0.158629	0.206499
0.536	41.06	42.0317	0.159367	0.207085
0.53604	44.03	41.9948	0.160104	0.207682
0.53608	41.44	41.9581	0.160839	0.208287
0.53612	43.35	41.9213	0.161573	0.2089
0.53616	41.92	41.8847	0.162307	0.20952
0.5362	42.64	41.8481	0.163039	0.210147
0.53624	42.97	41.8115	0.16377	0.21078
0.53628	41.39	41.775	0.1645	0.211417
0.53632	43.88	41.7386	0.165229	0.212058
0.53636	40.53	41.7022	0.165956	0.212702
0.5364	44.36	41.6658	0.166683	0.213348
0.53644	39.09	41.6296	0.167409	0.213994
0.53648	44.31	41.5933	0.168133	0.214639
0.53652	38.52	41.5572	0.168856	0.215283
0.53656	43.5	41.5211	0.169578	0.215923
0.5366	38.23	41.4851	0.170299	0.216559
0.53664	43.4	41.4491	0.171018	0.217189
0.53668	37.75	41.4132	0.171736	0.217814
0.53672	42.64	41.3773	0.172453	0.218431
0.53676	38.23	41.3416	0.173169	0.21904
0.5368	42.45	41.3059	0.173883	0.21964
0.53684	38.9	41.2702	0.174596	0.220231
0.53688	42.68	41.2346	0.175307	0.220813
0.53692	39.38	41.1991	0.176018	0.221386
0.53696	42.45	41.1636	0.176727	0.221949
0.537	39.19	41.1282	0.177435	0.222503
0.53704	43.16	41.0929	0.178142	0.223047
0.53708	39.72	41.0576	0.178848	0.223581
0.53712	43.55	41.0224	0.179553	0.224106
0.53716	40.39	40.9872	0.180256	0.224622
0.5372	42.83	40.952	0.180959	0.225127
0.53724	41.15	40.917	0.181661	0.225624
0.53728	41.49	40.8819	0.182361	0.22611
0.53732	42.16	40.847	0.183061	0.226587
0.53736	40.58	40.812	0.18376	0.227055
0.5374	43.21	40.7771	0.184457	0.227514
0.53744	39.43	40.7423	0.185154	0.227964
0.53748	43.88	40.7075	0.185849	0.228406
0.53752	38.47	40.6728	0.186544	0.228839
0.53756	43.02	40.6381	0.187237	0.229265
0.5376	37.75	40.6035	0.18793	0.229684
0.53764	42.68	40.569	0.188621	0.230096
0.53768	37.9	40.5345	0.18931	0.230503
0.53772	42.11	40.5001	0.189999	0.230904
0.53776	37.28	40.4657	0.190686	0.231301
0.5378	41.87	40.4314	0.191372	0.231694
0.53784	37.08	40.3971	0.192057	0.232084
0.53788	41.78	40.363	0.192741	0.232471
0.53792	37.95	40.3289	0.193423	0.232857
0.53796	41.82	40.2948	0.194103	0.233241
0.538	37.99	40.2609	0.194783	0.233625
0.53804	41.78	40.2269	0.195461	0.234008
0.53808	38.47	40.1931	0.196138	0.23439
0.53812	41.82	40.1593	0.196814	0.234772
0.53816	39	40.1256	0.197488	0.235154
0.5382	42.11	40.0919	0.198161	0.235536
0.53824	39.72	40.0583	0.198833	0.235916
0.53828	41.49	40.0248	0.199504	0.236297
0.53832	40.24	39.9913	0.200174	0.236676
0.53836	41.01	39.9579	0.200842	0.237055
0.5384	41.25	39.9245	0.20151	0.237432
0.53844	39.76	39.8912	0.202176	0.237807
0.53848	41.82	39.858	0.20284	0.238181
0.53852	38.28	39.8248	0.203504	0.238553
0.53856	42.21	39.7917	0.204166	0.238922
0.5386	37.13	39.7587	0.204827	0.239289
0.53864	42.25	39.7257	0.205486	0.239654
0.53868	36.7	39.6928	0.206144	0.240016
0.53872	41.49	39.66	0.2068	0.240375
0.53876	36.41	39.6272	0.207456	0.240732
0.5388	41.63	39.5945	0.208109	0.241087
0.53884	36.22	39.5619	0.208761	0.241439
0.53888	40.24	39.5294	0.209411	0.241789
0.53892	36.65	39.497	0.21006	0.242136
0.53896	40.72	39.4646	0.210708	0.242482
0.539	36.75	39.4323	0.211353	0.242825
0.53904	40.63	39.4001	0.211997	0.243166
0.53908	37.08	39.368	0.21264	0.243504
0.53912	41.15	39.3359	0.213281	0.24384
0.53916	37.18	39.304	0.213921	0.244173
0.5392	40.91	39.272	0.214559	0.244503
0.53924	38.62	39.2402	0.215196	0.244829
0.53928	41.3	39.2084	0.215831	0.245152
0.53932	38.09	39.1767	0.216466	0.245471
0.53936	40.2	39.1451	0.217098	0.245786
0.5394	38.95	39.1135	0.21773	0.246096
0.53944	39.81	39.082	0.21836	0.246402
0.53948	40.67	39.0506	0.218989	0.246704
0.53952	38.47	39.0192	0.219616	0.247
0.53956	41.15	38.9879	0.220242	0.247293
0.5396	37.71	38.9566	0.220867	0.24758
0.53964	41.34	38.9255	0.221491	0.247864
0.53968	36.17	38.8943	0.222113	0.248143
0.53972	41.49	38.8633	0.222734	0.248419
0.53976	35.89	38.8323	0.223354	0.248692
0.5398	40.67	38.8014	0.223972	0.248961
0.53984	35.46	38.7706	0.224589	0.249228
0.53988	40.39	38.7398	0.225204	0.249492
0.53992	35.74	38.7091	0.225818	0.249754
0.53996	40.05	38.6784	0.226431	0.250014
0.54	36.03	38.6479	0.227043	0.250273
0.54004	39.57	38.6174	0.227653	0.250531
0.54008	36.37	38.5869	0.228261	0.250787
0.54012	40.2	38.5566	0.228869	0.251042
0.54016	36.41	38.5262	0.229475	0.251297
0.5402	40.1	38.496	0.23008	0.25155
0.54024	36.94	38.4658	0.230684	0.251803
0.54028	40.24	38.4357	0.231286	0.252054
0.54032	37.37	38.4056	0.231888	0.252305
0.54036	40.72	38.3756	0.232488	0.252555
0.5404	37.56	38.3456	0.233088	0.252805
0.54044	39.72	38.3157	0.233686	0.253053
0.54048	38.66	38.2858	0.234283	0.2533
0.54052	39	38.256	0.23488	0.253546
0.54056	40.29	38.2262	0.235475	0.253792
0.5406	37.8	38.1965	0.23607	0.254036
0.54064	40.39	38.1669	0.236663	0.25428
0.54068	36.13	38.1372	0.237255	0.254523
0.54072	40.87	38.1077	0.237847	0.254765
0.54076	35.17	38.0781	0.238437	0.255007
0.5408	41.15	38.0487	0.239026	0.255248
0.54084	34.45	38.0193	0.239615	0.255489
0.54088	39.91	37.9899	0.240202	0.255729
0.54092	34.79	37.9606	0.240788	0.255969
0.54096	39.33	37.9314	0.241373	0.256209
0.541	35.41	37.9022	0.241957	0.256449
0.54104	39.09	37.873	0.242539	0.25669
0.54108	35.31	37.8439	0.243121	0.25693
0.54112	39.09	37.8149	0.243701	0.257171
0.54116	35.6	37.786	0.244281	0.257413
0.5412	39.19	37.757	0.244859	0.257655
0.54124	35.55	37.7282	0.245437	0.257899
0.54128	39.24	37.6994	0.246013	0.258143
0.54132	35.74	37.6706	0.246588	0.258388
0.54136	39.43	37.6419	0.247162	0.258635
0.5414	36.41	37.6132	0.247736	0.258884
0.54144	40.05	37.5846	0.248308	0.259135
0.54148	37.52	37.556	0.24888	0.259387
0.54152	38.9	37.5275	0.249451	0.259642
0.54156	38.19	37.499	0.250021	0.259899
0.5416	37.56	37.4705	0.25059	0.260159
0.54164	39.09	37.4421	0.251158	0.260421
0.54168	36.37	37.4137	0.251726	0.260686
0.54172	39.24	37.3854	0.252293	0.260955
0.54176	35.31	37.3571	0.252858	0.261226
0.5418	39.96	37.3288	0.253423	0.2615
0.54184	34.36	37.3006	0.253988	0.261777
0.54188	40.53	37.2725	0.254551	0.262058
0.54192	33.64	37.2443	0.255113	0.262341
0.54196	39	37.2163	0.255675	0.262627
0.542	33.54	37.1882	0.256235	0.262917
0.54204	39.05	37.1603	0.256795	0.263209
0.54208	34.12	37.1323	0.257354	0.263505
0.54212	38.52	37.1044	0.257912	0.263804
0.54216	35.22	37.0766	0.258469	0.264106
0.5422	38.14	37.0488	0.259025	0.26441
0.54224	34.88	37.021	0.25958	0.264718
0.54228	38.14	36.9933	0.260134	0.26503
0.54232	35.07	36.9656	0.260688	0.265344
0.54236	39.09	36.938	0.261241	0.265662
0.5424	35.46	36.9103	0.261793	0.265984
0.54244	38.76	36.8828	0.262345	0.266309
0.54248	35.94	36.8552	0.262895	0.266639
0.54252	38.95	36.8277	0.263446	0.266972
0.54256	36.37	36.8002	0.263995	0.267309
0.5426	38.42	36.7728	0.264544	0.26765
0.54264	37.47	36.7454	0.265093	0.267996
0.54268	37.52	36.718	0.265641	0.268345
0.54272	38.52	36.6906	0.266188	0.268698
0.54276	35.74	36.6633	0.266735	0.269055
0.5428	39.33	36.6359	0.267281	0.269415
0.54284	34.4	36.6087	0.267827	0.269778
0.54288	39.53	36.5814	0.268371	0.270145
0.54292	33.73	36.5542	0.268916	0.270513
0.54296	38.76	36.527	0.269459	0.270885
0.543	33.4	36.4999	0.270002	0.271258
0.54304	37.75	36.4728	0.270544	0.271634
0.54308	33.45	36.4457	0.271085	0.27201
0.54312	37.66	36.4187	0.271626	0.272389
0.54316	33.4	36.3917	0.272165	0.272768
0.5432	37.47	36.3648	0.272704	0.273148
0.54324	33.97	36.3379	0.273242	0.273529
0.54328	37.52	36.311	0.273779	0.273911
0.54332	33.93	36.2842	0.274316	0.274294
0.54336	37.95	36.2574	0.274852	0.274677
0.5434	34.12	36.2307	0.275387	0.275061
0.54344	38.23	36.204	0.275921	0.275446
0.54348	34.74	36.1773	0.276454	0.275832
0.54352	38.04	36.1506	0.276987	0.276218
0.54356	35.36	36.124	0.27752	0.276605
0.5436	37.85	36.0974	0.278051	0.276993
0.54364	36.13	36.0709	0.278582	0.277381
0.54368	37.28	36.0444	0.279113	0.277771
0.54372	37.08	36.0179	0.279643	0.278161
0.54376	36.13	35.9914	0.280172	0.278552
0.5438	38.09	35.9649	0.280701	0.278945
0.54384	34.98	35.9385	0.281229	0.279338
0.54388	38.28	35.9122	0.281757	0.279733
0.54392	33.59	35.8858	0.282284	0.28013
0.54396	38.71	35.8595	0.28281	0.280528
0.544	32.68	35.8332	0.283336	0.280929
0.54404	38.14	35.807	0.28386	0.281332
0.54408	32.15	35.7808	0.284385	0.281739
0.54412	37.95	35.7546	0.284908	0.282149
0.54416	32.3	35.7285	0.28543	0.282563
0.5442	36.99	35.7024	0.285952	0.282981
0.54424	32.49	35.6764	0.286473	0.283404
0.54428	36.99	35.6504	0.286993	0.283832
0.54432	33.11	35.6244	0.287512	0.284265
0.54436	37.18	35.5985	0.28803	0.284703
0.5444	33.54	35.5726	0.288548	0.285147
0.54444	36.8	35.5468	0.289065	0.285597
0.54448	33.59	35.521	0.289581	0.286051
0.54452	36.99	35.4952	0.290096	0.28651
0.54456	34.21	35.4695	0.290611	0.286975
0.5446	37.66	35.4437	0.291125	0.287443
0.54464	35.03	35.4181	0.291638	0.287916
0.54468	37.08	35.3924	0.292151	0.288392
0.54472	35.6	35.3668	0.292663	0.288871
0.54476	36.27	35.3413	0.293175	0.289353
0.5448	36.7	35.3157	0.293686	0.289837
0.54484	34.93	35.2902	0.294196	0.290322
0.54488	37.28	35.2647	0.294706	0.290809
0.54492	33.93	35.2392	0.295215	0.291297
0.54496	37.71	35.2138	0.295724	0.291786
0.545	32.73	35.1884	0.296232	0.292275
0.54504	37.9	35.1631	0.296739	0.292765
0.54508	32.15	35.1377	0.297245	0.293255
0.54512	37.18	35.1125	0.297751	0.293745
0.54516	31.87	35.0872	0.298256	0.294237
0.5452	36.89	35.062	0.29876	0.294728
0.54524	31.44	35.0369	0.299263	0.295221
0.54528	36.17	35.0117	0.299765	0.295714
0.54532	32.15	34.9866	0.300267	0.296208
0.54536	36.41	34.9616	0.300768	0.296703
0.5454	32.44	34.9366	0.301268	0.2972
0.54544	36.56	34.9116	0.301767	0.297697
0.54548	32.44	34.8867	0.302266	0.298196
0.54552	36.46	34.8618	0.302763	0.298695
0.54556	33.21	34.837	0.30326	0.299196
0.5456	36.51	34.8122	0.303756	0.299699
0.54564	33.64	34.7874	0.304252	0.300203
0.54568	36.89	34.7626	0.304747	0.300708
0.54572	34.21	34.7379	0.305241	0.301214
0.54576	36.41	34.7132	0.305735	0.301722
0.5458	34.98	34.6886	0.306228	0.302231
0.54584	35.41	34.6639	0.306721	0.302742
0.54588	36.13	34.6393	0.307213	0.303255
0.54592	34.5	34.6148	0.307705	0.303769
0.54596	36.84	34.5902	0.308196	0.304285
0.546	33.35	34.5657	0.308686	0.304802
0.54604	37.28	34.5412	0.309176	0.305322
0.54608	31.82	34.5168	0.309665	0.305843
0.54612	37.28	34.4924	0.310153	0.306366
0.54616	31.24	34.468	0.310641	0.30689
0.5462	36.8	34.4436	0.311127	0.307415
0.54624	31.2	34.4193	0.311614	0.307942
0.54628	36.13	34.3951	0.312099	0.308469
0.54632	31.48	34.3708	0.312583	0.308997
0.54636	35.65	34.3467	0.313067	0.309524
0.5464	31.53	34.3225	0.31355	0.310051
0.54644	35.5	34.2984	0.314032	0.310577
0.54648	31.82	34.2744	0.314513	0.311101
0.54652	35.55	34.2504	0.314993	0.311624
0.54656	32.3	34.2264	0.315472	0.312145
0.5466	35.98	34.2025	0.315951	0.312663
0.54664	32.25	34.1786	0.316428	0.313179
0.54668	36.08	34.1547	0.316905	0.313693
0.54672	33.11	34.1309	0.317381	0.314203
0.54676	36.17	34.1072	0.317857	0.314711
0.5468	33.54	34.0834	0.318331	0.315216
0.54684	35.79	34.0597	0.318805	0.315719
0.54688	34.55	34.0361	0.319278	0.316219
0.54692	34.5	34.0125	0.319751	0.316717
0.54696	35.46	33.9889	0.320222	0.317214
0.547	33.16	33.9653	0.320693	0.317709
0.54704	36.27	33.9418	0.321163	0.318202
0.54708	32.11	33.9184	0.321632	0.318694
0.54712	36.65	33.895	0.322101	0.319186
0.54716	31.44	33.8716	0.322568	0.319678
0.5472	36.22	33.8483	0.323035	0.320169
0.54724	30.53	33.825	0.3235	0.32066
0.54728	35.94	33.8018	0.323965	0.321152
0.54732	30.34	33.7786	0.324428	0.321644
0.54736	35.31	33.7555	0.324891	0.322138
0.5474	30.19	33.7324	0.325352	0.322633
0.54744	35.17	33.7094	0.325812	0.323129
0.54748	30.48	33.6864	0.326272	0.323627
0.54752	34.83	33.6635	0.32673	0.324127
0.54756	30.81	33.6407	0.327187	0.32463
0.5476	35.17	33.6179	0.327643	0.325135
0.54764	31.53	33.5951	0.328098	0.325643
0.54768	35.17	33.5724	0.328551	0.326154
0.54772	32.35	33.5498	0.329004	0.326668
0.54776	35.7	33.5272	0.329456	0.327186
0.5478	32.63	33.5046	0.329907	0.327707
0.54784	35.22	33.4821	0.330358	0.328232
0.54788	33.3	33.4597	0.330807	0.32876
0.54792	34.45	33.4372	0.331255	0.329292
0.54796	34.21	33.4149	0.331703	0.329827
0.548	33.73	33.3925	0.33215	0.330365
0.54804	35.17	33.3702	0.332595	0.330906
0.54808	32.58	33.348	0.33304	0.331449
0.54812	35.74	33.3258	0.333484	0.331995
0.54816	31.53	33.3036	0.333928	0.332543
0.5482	35.84	33.2815	0.33437	0.333092
0.54824	30.53	33.2594	0.334811	0.333642
0.54828	35.5	33.2374	0.335252	0.334193
0.54832	30.19	33.2155	0.335691	0.334744
0.54836	35.31	33.1935	0.336129	0.335295
0.5484	29.9	33.1717	0.336566	0.335846
0.54844	34.74	33.1499	0.337003	0.336396
0.54848	30.29	33.1281	0.337438	0.336946
0.54852	34.4	33.1064	0.337872	0.337495
0.54856	30.38	33.0848	0.338304	0.338043
0.5486	34.4	33.0632	0.338736	0.33859
0.54864	30.62	33.0417	0.339167	0.339136
0.54868	34.4	33.0202	0.339597	0.339682
0.54872	31.1	32.9987	0.340025	0.340227
0.54876	34.74	32.9774	0.340453	0.340772
0.5488	31.82	32.956	0.340879	0.341316
0.54884	34.21	32.9348	0.341305	0.34186
0.54888	31.77	32.9135	0.34173	0.342404
0.54892	35.22	32.8923	0.342153	0.342948
0.54896	32.82	32.8712	0.342576	0.343492
0.549	34.16	32.8501	0.342998	0.344037
0.54904	33.93	32.829	0.343419	0.344582
0.54908	33.25	32.808	0.343839	0.345128
0.54912	34.69	32.7871	0.344258	0.345675
0.54916	31.63	32.7662	0.344677	0.346222
0.5492	35.22	32.7453	0.345094	0.34677
0.54924	30.62	32.7245	0.34551	0.347319
0.54928	35.36	32.7037	0.345926	0.347869
0.54932	29.76	32.683	0.34634	0.348419
0.54936	35.27	32.6623	0.346753	0.34897
0.5494	29.38	32.6417	0.347165	0.349522
0.54944	34.12	32.6212	0.347576	0.350075
0.54948	29.19	32.6007	0.347986	0.350629
0.54952	34.4	32.5803	0.348395	0.351183
0.54956	29.14	32.5599	0.348802	0.351739
0.5496	33.69	32.5396	0.349208	0.352294
0.54964	30	32.5193	0.349613	0.352851
0.54968	33.64	32.4991	0.350017	0.353408
0.54972	30.05	32.479	0.35042	0.353966
0.54976	33.93	32.4589	0.350821	0.354525
0.5498	30.91	32.4389	0.351221	0.355083
0.54984	34.31	32.419	0.351621	0.355643
0.54988	30.91	32.3991	0.352019	0.356202
0.54992	34.12	32.3792	0.352416	0.356761
0.54996	31.53	32.3594	0.352812	0.35732
0.55	34.02	32.3397	0.353207	0.357879
0.55004	32.3	32.32	0.353601	0.358437
0.55008	33.78	32.3003	0.353994	0.358995
0.55012	33.4	32.2807	0.354386	0.359552
0.55016	32.06	32.2611	0.354777	0.360108
0.5502	34.45	32.2416	0.355167	0.360662
0.55024	31.48	32.2222	0.355556	0.361216
0.55028	34.83	32.2028	0.355944	0.361768
0.55032	30.19	32.1834	0.356331	0.36232
0.55036	34.69	32.1641	0.356717	0.362869
0.5504	29.23	32.1449	0.357102	0.363418
0.55044	34.5	32.1257	0.357485	0.363965
0.55048	29.23	32.1066	0.357868	0.364511
0.55052	34.07	32.0876	0.358249	0.365055
0.55056	28.66	32.0686	0.358629	0.365599
0.5506	33.3	32.0496	0.359008	0.366142
0.55064	29.57	32.0308	0.359385	0.366684
0.55068	33.59	32.012	0.359761	0.367225
0.55072	29.28	31.9932	0.360136	0.367765
0.55076	33.49	31.9745	0.360509	0.368305
0.5508	29.81	31.9559	0.360881	0.368844
0.55084	33.4	31.9374	0.361252	0.369383
0.55088	30.14	31.9189	0.361621	0.369922
0.55092	34.02	31.9005	0.36199	0.370459
0.55096	30.24	31.8822	0.362357	0.370997
0.551	33.54	31.8639	0.362722	0.371533
0.55104	31.15	31.8457	0.363087	0.372069
0.55108	33.45	31.8275	0.36345	0.372604
0.55112	32.15	31.8094	0.363812	0.373138
0.55116	32.63	31.7914	0.364172	0.37367
0.5512	32.97	31.7734	0.364531	0.374201
0.55124	31.29	31.7555	0.36489	0.374731
0.55128	33.73	31.7377	0.365246	0.375258
0.55132	30.05	31.7199	0.365602	0.375784
0.55136	34.6	31.7022	0.365956	0.376307
0.5514	29.23	31.6846	0.366308	0.376828
0.55144	34.12	31.667	0.366659	0.377346
0.55148	28.42	31.6495	0.367009	0.37786
0.55152	33.97	31.6321	0.367357	0.378372
0.55156	28.52	31.6148	0.367704	0.37888
0.5516	33.64	31.5975	0.368049	0.379385
0.55164	28.47	31.5804	0.368393	0.379886
0.55168	33.06	31.5633	0.368735	0.380382
0.55172	28.28	31.5463	0.369075	0.380874
0.55176	32.68	31.5293	0.369413	0.381361
0.5518	29.52	31.5125	0.36975	0.381842
0.55184	32.3	31.4957	0.370086	0.382319
0.55188	29.43	31.479	0.37042	0.38279
0.55192	33.02	31.4624	0.370752	0.383254
0.55196	29.57	31.4459	0.371082	0.383713
0.552	33.45	31.4294	0.371411	0.384166
0.55204	30.38	31.4131	0.371738	0.384612
0.55208	33.59	31.3968	0.372064	0.385052
0.55212	30.86	31.3806	0.372388	0.385485
0.55216	33.16	31.3644	0.372711	0.385911
0.5522	31.44	31.3484	0.373032	0.38633
0.55224	31.68	31.3324	0.373352	0.386743
0.55228	33.06	31.3165	0.37367	0.387149
0.55232	30.43	31.3007	0.373987	0.387549
0.55236	33.49	31.2849	0.374302	0.387941
0.5524	29.52	31.2692	0.374615	0.388328
0.55244	33.49	31.2537	0.374927	0.388708
0.55248	28.18	31.2382	0.375237	0.389081
0.55252	33.93	31.2227	0.375545	0.389449
0.55256	28.28	31.2074	0.375852	0.38981
0.5526	33.45	31.1922	0.376157	0.390166
0.55264	27.8	31.177	0.37646	0.390516
0.55268	32.78	31.1619	0.376761	0.39086
0.55272	27.85	31.147	0.377061	0.391198
0.55276	32.68	31.1321	0.377359	0.391531
0.5528	28.04	31.1173	0.377654	0.391859
0.55284	31.96	31.1026	0.377948	0.392181
0.55288	28.52	31.088	0.378241	0.392498
0.55292	32.35	31.0734	0.378531	0.39281
0.55296	28.8	31.059	0.37882	0.393117
0.553	32.44	31.0447	0.379107	0.393419
0.55304	29.33	31.0304	0.379392	0.393717
0.55308	32.87	31.0162	0.379676	0.394009
0.55312	29.76	31.0021	0.379958	0.394298
0.55316	32.92	30.9881	0.380238	0.394582
0.5532	31.05	30.9741	0.380517	0.394861
0.55324	32.54	30.9603	0.380794	0.395137
0.55328	31.63	30.9465	0.38107	0.395409
0.55332	31.48	30.9328	0.381345	0.395676
0.55336	32.78	30.9191	0.381617	0.39594
0.5534	30.57	30.9056	0.381889	0.3962
0.55344	33.21	30.8921	0.382159	0.396456
0.55348	29.04	30.8787	0.382427	0.396708
0.55352	33.35	30.8653	0.382694	0.396957
0.55356	28.23	30.8521	0.382959	0.397201
0.5536	33.64	30.8389	0.383222	0.397442
0.55364	27.94	30.8258	0.383484	0.397678
0.55368	33.11	30.8128	0.383745	0.39791
0.55372	27.32	30.7998	0.384004	0.398138
0.55376	32.3	30.787	0.384261	0.398362
0.5538	27.61	30.7742	0.384516	0.398582
0.55384	32.06	30.7615	0.384769	0.398798
0.55388	27.75	30.7489	0.385021	0.399009
0.55392	32.2	30.7364	0.385272	0.399217
0.55396	28.13	30.724	0.38552	0.39942
0.554	32.06	30.7117	0.385767	0.39962
0.55404	28.66	30.6994	0.386012	0.399816
0.55408	32.01	30.6872	0.386256	0.400009
0.55412	29.33	30.6751	0.386498	0.400198
0.55416	32.73	30.6631	0.386738	0.400384
0.5542	29.71	30.6511	0.386977	0.400567
0.55424	32.73	30.6393	0.387215	0.400747
0.55428	30.05	30.6275	0.387451	0.400924
0.55432	31.87	30.6157	0.387685	0.401098
0.55436	31.58	30.6041	0.387918	0.401269
0.5544	31.2	30.5925	0.38815	0.401437
0.55444	32.63	30.581	0.38838	0.401602
0.55448	29.95	30.5696	0.388609	0.401764
0.55452	32.92	30.5582	0.388836	0.401923
0.55456	28.99	30.5469	0.389062	0.402079
0.5546	33.25	30.5357	0.389286	0.402232
0.55464	28.13	30.5246	0.389509	0.402381
0.55468	32.82	30.5135	0.38973	0.402527
0.55472	27.89	30.5025	0.38995	0.402669
0.55476	32.25	30.4916	0.390168	0.402808
0.5548	27.08	30.4808	0.390384	0.402944
0.55484	31.87	30.4701	0.390598	0.403075
0.55488	27.32	30.4594	0.390811	0.403204
0.55492	31.96	30.4489	0.391022	0.403328
0.55496	27.42	30.4384	0.391231	0.40345
0.555	31.58	30.4281	0.391439	0.403567
0.55504	28.23	30.4178	0.391645	0.403681
0.55508	31.96	30.4076	0.391849	0.403791
0.55512	28.13	30.3975	0.392051	0.403898
0.55516	32.35	30.3874	0.392252	0.404
0.5552	28.61	30.3775	0.392451	0.404099
0.55524	32.25	30.3676	0.392648	0.404193
0.55528	29.43	30.3578	0.392843	0.404283
0.55532	32.63	30.3481	0.393037	0.404369
0.55536	29.95	30.3385	0.39323	0.404449
0.5554	31.58	30.329	0.393421	0.404525
0.55544	31.39	30.3195	0.39361	0.404595
0.55548	30.77	30.3101	0.393797	0.40466
0.55552	31.87	30.3008	0.393983	0.404719
0.55556	29.47	30.2916	0.394168	0.404773
0.5556	32.87	30.2825	0.39435	0.40482
0.55564	28.18	30.2734	0.394531	0.404862
0.55568	33.02	30.2645	0.394711	0.404897
0.55572	27.13	30.2556	0.394888	0.404926
0.55576	32.92	30.2468	0.395064	0.404949
0.5558	27.27	30.2381	0.395238	0.404965
0.55584	31.91	30.2295	0.39541	0.404975
0.55588	26.94	30.221	0.39558	0.40498
0.55592	32.06	30.2126	0.395748	0.404978
0.55596	26.89	30.2043	0.395914	0.40497
0.556	31.68	30.1961	0.396078	0.404957
0.55604	27.08	30.188	0.396241	0.404938
0.55608	31.15	30.1799	0.396401	0.404913
0.55612	27.89	30.172	0.396559	0.404882
0.55616	31.34	30.1642	0.396716	0.404846
0.5562	28.42	30.1565	0.39687	0.404804
0.55624	31.96	30.1489	0.397023	0.404756
0.55628	28.47	30.1413	0.397174	0.404702
0.55632	31.68	30.1339	0.397322	0.404643
0.55636	29.23	30.1265	0.397469	0.404577
0.5564	32.2	30.1193	0.397615	0.404506
0.55644	29.9	30.1121	0.397758	0.404428
0.55648	31.34	30.105	0.3979	0.404344
0.55652	30.81	30.098	0.398039	0.404253
0.55656	30.29	30.0911	0.398177	0.404155
0.5566	32.2	30.0843	0.398314	0.404051
0.55664	28.95	30.0776	0.398448	0.403941
0.55668	32.58	30.071	0.398581	0.403823
0.55672	27.94	30.0644	0.398712	0.403699
0.55676	32.92	30.058	0.398841	0.403568
0.5568	26.94	30.0516	0.398968	0.40343
0.55684	32.01	30.0454	0.399093	0.403286
0.55688	26.94	30.0392	0.399216	0.403135
0.55692	31.77	30.0331	0.399337	0.402977
0.55696	27.22	30.0272	0.399456	0.402812
0.557	31.39	30.0213	0.399574	0.40264
0.55704	26.94	30.0156	0.399689	0.402462
0.55708	31.2	30.0099	0.399802	0.402277
0.55712	27.51	30.0043	0.399913	0.402085
0.55716	31.29	29.9989	0.400023	0.401886
0.5572	28.18	29.9935	0.40013	0.40168
0.55724	31.44	29.9882	0.400235	0.401466
0.55728	28.09	29.9831	0.400339	0.401246
0.55732	31.87	29.978	0.40044	0.401018
0.55736	28.9	29.973	0.40054	0.400782
0.5574	31.96	29.9681	0.400638	0.400539
0.55744	29.33	29.9633	0.400734	0.400288
0.55748	31.82	29.9586	0.400828	0.400029
0.55752	29.71	29.954	0.40092	0.399763
0.55756	30.77	29.9495	0.40101	0.399488
0.5576	31.24	29.945	0.401099	0.399205
0.55764	30.38	29.9407	0.401186	0.398915
0.55768	31.82	29.9364	0.401271	0.398616
0.55772	28.47	29.9323	0.401354	0.398309
0.55776	32.25	29.9282	0.401436	0.397994
0.5578	27.56	29.9242	0.401515	0.397672
0.55784	32.73	29.9204	0.401593	0.397342
0.55788	26.94	29.9166	0.401668	0.397004
0.55792	32.15	29.9129	0.401742	0.396659
0.55796	26.51	29.9093	0.401813	0.396306
0.558	31.68	29.9059	0.401883	0.395946
0.55804	26.7	29.9025	0.40195	0.395578
0.55808	31.68	29.8992	0.402016	0.395204
0.55812	26.79	29.8961	0.402079	0.394822
0.55816	30.72	29.893	0.40214	0.394434
0.5582	27.32	29.89	0.402199	0.394039
0.55824	30.91	29.8872	0.402256	0.393636
0.55828	28.04	29.8844	0.402311	0.393227
0.55832	31.29	29.8818	0.402364	0.392811
0.55836	28.04	29.8793	0.402415	0.392389
0.5584	31.82	29.8768	0.402464	0.391959
0.55844	28.37	29.8745	0.402511	0.391523
0.55848	31.72	29.8722	0.402556	0.39108
0.55852	29.47	29.8701	0.402599	0.390631
0.55856	31.53	29.868	0.40264	0.390175
0.5586	29.81	29.866	0.40268	0.389712
0.55864	30.72	29.8641	0.402717	0.389242
0.55868	31.2	29.8624	0.402753	0.388766
0.55872	29.52	29.8607	0.402787	0.388284
0.55876	31.53	29.8591	0.402819	0.387796
0.5588	28.56	29.8576	0.402849	0.387301
0.55884	32.15	29.8562	0.402877	0.386799
0.55888	27.22	29.8548	0.402903	0.386292
0.55892	32.06	29.8536	0.402928	0.385778
0.55896	27.18	29.8525	0.40295	0.385259
0.559	31.96	29.8515	0.402971	0.384733
0.55904	26.36	29.8505	0.402989	0.384202
0.55908	31.2	29.8497	0.403006	0.383665
0.55912	26.55	29.849	0.403021	0.383123
0.55916	31.72	29.8483	0.403033	0.382575
0.5592	26.65	29.8478	0.403044	0.382022
0.55924	31.1	29.8474	0.403053	0.381464
0.55928	27.18	29.847	0.40306	0.380901
0.55932	31.29	29.8468	0.403065	0.380333
0.55936	27.51	29.8466	0.403068	0.37976
0.5594	31.77	29.8465	0.403069	0.379183
				0.378602
