# Supplementary material for: Shear Thickening Fluids in Cork Agglomerates: An Exploration of Advantages and Drawbacks
Source: Preprints.org preprint supplement (doi:10.20944/preprints202304.0004.v1), 2023-04-03
Supplement: Supplementary file 9 [file CG_x_20.xlsx]

## Sheet: data
Time - Force (Bridge) - Force	Amplitude - Force (Bridge) - Force	data
0	35.64	-35.64		-1
4e-05	33.94	-33.94
8e-05	32.63	-32.63
0.00012	30.93	-30.93
0.00016	31.57	-31.57
0.0002	16.02	-16.02
0.00024	28.07	-28.07
0.00028	13.59	-13.59
0.00032	32.58	-32.58
0.00036	21.59	-21.59
0.0004	25.9	-25.9
0.00044	15.76	-15.76
0.00048	12.75	-12.75
0.00052	21.97	-21.97
0.00056	32.49	-32.49
0.0006	32.92	-32.92
0.00064	27.26	-27.26
0.00068	17.35	-17.35
0.00072	16.36	-16.36
0.00076	35.09	-35.09
0.0008	24.51	-24.51
0.00084	27.23	-27.23
0.00088	27.23	-27.23
0.00092	27.81	-27.81
0.00096	19.77	-19.77
0.001	34.48	-34.48
0.00104	37.75	-37.75
0.00108	31.48	-31.48
0.00112	19.34	-19.34
0.00116	28.62	-28.62
0.0012	36.97	-36.97
0.00124	15.67	-15.67
0.00128	27.4	-27.4
0.00132	31.91	-31.91
0.00136	20.67	-20.67
0.0014	26.91	-26.91
0.00144	28.13	-28.13
0.00148	10.55	-10.55
0.00152	34.6	-34.6
0.00156	25.58	-25.58
0.0016	19.05	-19.05
0.00164	1.999	-1.999
0.00168	23.59	-23.59
0.00172	32.69	-32.69
0.00176	15.41	-15.41
0.0018	42.66	-42.66
0.00184	26.48	-26.48
0.00188	35.03	-35.03
0.00192	17.75	-17.75
0.00196	23.88	-23.88
0.002	39.17	-39.17
0.00204	42.72	-42.72
0.00208	21.45	-21.45
0.00212	-14.39	14.39
0.00216	15.67	-15.67
0.0022	40.99	-40.99
0.00224	30.32	-30.32
0.00228	3.097	-3.097
0.00232	-41.29	41.29
0.00236	13.91	-13.91
0.0024	28.82	-28.82
0.00244	-26.41	26.41
0.00248	-57.62	57.62
0.00252	-15.77	15.77
0.00256	9.311	-9.311
0.0026	-1.845	1.845
0.00264	-21.47	21.47
0.00268	-27.54	27.54
0.00272	13.56	-13.56
0.00276	-10.51	10.51
0.0028	-38.75	38.75
0.00284	8.618	-8.618
0.00288	17.14	-17.14
0.00292	-13.43	13.43
0.00296	-37.94	37.94
0.003	-28.2	28.2
0.00304	12.03	-12.03
0.00308	-10.14	10.14
0.00312	-16.76	16.76
0.00316	-29.94	29.94
0.0032	2.404	-2.404
0.00324	26.91	-26.91
0.00328	19.17	-19.17
0.00332	13.73	-13.73
0.00336	-2.22	2.22
0.0034	30.26	-30.26
0.00344	22.09	-22.09
0.00348	19.77	-19.77
0.00352	6.017	-6.017
0.00356	6.71	-6.71
0.0036	23.65	-23.65
0.00364	20.44	-20.44
0.00368	18.79	-18.79
0.00372	15.55	-15.55
0.00376	18.96	-18.96
0.0038	23.7	-23.7
0.00384	-2.885	2.885
0.00388	7.086	-7.086
0.00392	37.17	-37.17
0.00396	31.85	-31.85
0.004	37.06	-37.06
0.00404	11.59	-11.59
0.00408	4.08	-4.08
0.00412	669.8m	-0.6698
0.00416	-19.85	19.85
0.0042	-2.856	2.856
0.00424	19.28	-19.28
0.00428	28.18	-28.18
0.00432	34.34	-34.34
0.00436	6.306	-6.306
0.0044	7.288	-7.288
0.00444	987.7m	-0.9877
0.00448	3.733	-3.733
0.00452	23.47	-23.47
0.00456	-15.25	15.25
0.0046	43.53	-43.53
0.00464	21.88	-21.88
0.00468	25.81	-25.81
0.00472	25.44	-25.44
0.00476	-24.45	24.45
0.0048	22.2	-22.2
0.00484	-23.83m	0.02383
0.00488	9.803	-9.803
0.00492	10.76	-10.76
0.00496	13.42	-13.42
0.005	26.28	-26.28
0.00504	13.68	-13.68
0.00508	15.24	-15.24
0.00512	17.29	-17.29
0.00516	24.63	-24.63
0.0052	20.52	-20.52
0.00524	-7.22	7.22
0.00528	323m	-0.323
0.00532	28.33	-28.33
0.00536	12.69	-12.69
0.0054	21.16	-21.16
0.00544	21.02	-21.02
0.00548	4.918	-4.918
0.00552	19.8	-19.8
0.00556	24.05	-24.05
0.0056	40.03	-40.03
0.00564	40.26	-40.26
0.00568	16.28	-16.28
0.00572	23.3	-23.3
0.00576	29.83	-29.83
0.0058	29.22	-29.22
0.00584	24.72	-24.72
0.00588	14.54	-14.54
0.00592	41.91	-41.91
0.00596	7.057	-7.057
0.006	30.87	-30.87
0.00604	9.6	-9.6
0.00608	27.84	-27.84
0.00612	14.63	-14.63
0.00616	19.11	-19.11
0.0062	25.35	-25.35
0.00624	24.6	-24.6
0.00628	27.87	-27.87
0.00632	25.9	-25.9
0.00636	44.4	-44.4
0.0064	25.58	-25.58
0.00644	28.18	-28.18
0.00648	45.09	-45.09
0.00652	25.15	-25.15
0.00656	38.56	-38.56
0.0066	38.67	-38.67
0.00664	38.27	-38.27
0.00668	45.9	-45.9
0.00672	13.27	-13.27
0.00676	39.31	-39.31
0.0068	39.89	-39.89
0.00684	41.13	-41.13
0.00688	21.57	-21.57
0.00692	26.45	-26.45
0.00696	12.43	-12.43
0.007	38.99	-38.99
0.00704	19.08	-19.08
0.00708	31.02	-31.02
0.00712	39.28	-39.28
0.00716	29.08	-29.08
0.0072	38.33	-38.33
0.00724	15.67	-15.67
0.00728	37.81	-37.81
0.00732	42.32	-42.32
0.00736	35.73	-35.73
0.0074	29.51	-29.51
0.00744	39.11	-39.11
0.00748	21.65	-21.65
0.00752	32.03	-32.03
0.00756	30.03	-30.03
0.0076	16.8	-16.8
0.00764	43.73	-43.73
0.00768	35.18	-35.18
0.00772	32.32	-32.32
0.00776	36.54	-36.54
0.0078	39.57	-39.57
0.00784	35.9	-35.9
0.00788	40.29	-40.29
0.00792	15.79	-15.79
0.00796	35.52	-35.52
0.008	31.91	-31.91
0.00804	36.22	-36.22
0.00808	31.45	-31.45
0.00812	30.12	-30.12
0.00816	32.69	-32.69
0.0082	31.68	-31.68
0.00824	21.71	-21.71
0.00828	16.25	-16.25
0.00832	42.49	-42.49
0.00836	27.4	-27.4
0.0084	25.67	-25.67
0.00844	35.67	-35.67
0.00848	15.87	-15.87
0.00852	31.74	-31.74
0.00856	51.33	-51.33
0.0086	42.66	-42.66
0.00864	40.5	-40.5
0.00868	35.55	-35.55
0.00872	20.35	-20.35
0.00876	38.39	-38.39
0.0088	36.57	-36.57
0.00884	37.49	-37.49
0.00888	41.07	-41.07
0.00892	64.69	-64.69
0.00896	52.32	-52.32
0.009	27.66	-27.66
0.00904	34.2	-34.2
0.00908	34.31	-34.31
0.00912	32.69	-32.69
0.00916	10.5	-10.5
0.0092	50.61	-50.61
0.00924	35.55	-35.55
0.00928	31.88	-31.88
0.00932	26.45	-26.45
0.00936	22.89	-22.89
0.0094	47.2	-47.2
0.00944	28.41	-28.41
0.00948	39.28	-39.28
0.00952	26.68	-26.68
0.00956	34.51	-34.51
0.0096	35.18	-35.18
0.00964	16.57	-16.57
0.00968	22.92	-22.92
0.00972	26.33	-26.33
0.00976	43.88	-43.88
0.0098	49.92	-49.92
0.00984	26.48	-26.48
0.00988	29.34	-29.34
0.00992	37.66	-37.66
0.00996	25.38	-25.38
0.01	21.22	-21.22
0.01004	47.84	-47.84
0.01008	27.84	-27.84
0.01012	35.87	-35.87
0.01016	40.58	-40.58
0.0102	44.69	-44.69
0.01024	48.27	-48.27
0.01028	46.68	-46.68
0.01032	45.35	-45.35
0.01036	43.39	-43.39
0.0104	38.91	-38.91
0.01044	43.27	-43.27
0.01048	38.33	-38.33
0.01052	31.02	-31.02
0.01056	48.65	-48.65
0.0106	28.1	-28.1
0.01064	32.2	-32.2
0.01068	30.26	-30.26
0.01072	41.33	-41.33
0.01076	26.39	-26.39
0.0108	36.88	-36.88
0.01084	22.17	-22.17
0.01088	37.32	-37.32
0.01092	42.49	-42.49
0.01096	42.23	-42.23
0.011	32.49	-32.49
0.01104	27.46	-27.46
0.01108	37.2	-37.2
0.01112	38.33	-38.33
0.01116	35.55	-35.55
0.0112	25.18	-25.18
0.01124	36.62	-36.62
0.01128	49.19	-49.19
0.01132	35.9	-35.9
0.01136	36.25	-36.25
0.0114	25.87	-25.87
0.01144	46.42	-46.42
0.01148	27.11	-27.11
0.01152	27.81	-27.81
0.01156	27.46	-27.46
0.0116	36.94	-36.94
0.01164	40.52	-40.52
0.01168	46.59	-46.59
0.01172	28.94	-28.94
0.01176	41.62	-41.62
0.0118	40.26	-40.26
0.01184	21.71	-21.71
0.01188	29.86	-29.86
0.01192	35.15	-35.15
0.01196	41.91	-41.91
0.012	31.51	-31.51
0.01204	47.2	-47.2
0.01208	32.35	-32.35
0.01212	88.12	-88.12
0.01216	84.05	-84.05
0.0122	61.94	-61.94
0.01224	89.37	-89.37
0.01228	117.3	-117.3
0.01232	65.23	-65.23
0.01236	27.03	-27.03
0.0124	77.75	-77.75
0.01244	74.57	-74.57
0.01248	60.15	-60.15
0.01252	60.35	-60.35
0.01256	68.73	-68.73
0.0126	89.05	-89.05
0.01264	78.56	-78.56
0.01268	51.36	-51.36
0.01272	70.84	-70.84
0.01276	74.43	-74.43
0.0128	71.22	-71.22
0.01284	49.51	-49.51
0.01288	66.07	-66.07
0.01292	86.16	-86.16
0.01296	82.4	-82.4
0.013	71.71	-71.71
0.01304	38.59	-38.59
0.01308	74.14	-74.14
0.01312	67.46	-67.46
0.01316	76.3	-76.3
0.0132	42.14	-42.14
0.01324	52.37	-52.37
0.01328	83.15	-83.15
0.01332	62.43	-62.43
0.01336	45.99	-45.99
0.0134	60.35	-60.35
0.01344	84.25	-84.25
0.01348	64.8	-64.8
0.01352	44.22	-44.22
0.01356	55.47	-55.47
0.0136	85.44	-85.44
0.01364	63.36	-63.36
0.01368	40.81	-40.81
0.01372	44.31	-44.31
0.01376	68.53	-68.53
0.0138	88.41	-88.41
0.01384	66.13	-66.13
0.01388	25.58	-25.58
0.01392	55.99	-55.99
0.01396	70.73	-70.73
0.014	69.34	-69.34
0.01404	68.67	-68.67
0.01408	70.61	-70.61
0.01412	45.9	-45.9
0.01416	66.71	-66.71
0.0142	46.88	-46.88
0.01424	64.71	-64.71
0.01428	72.34	-72.34
0.01432	70.32	-70.32
0.01436	67.06	-67.06
0.0144	37.37	-37.37
0.01444	39.54	-39.54
0.01448	61.25	-61.25
0.01452	49.72	-49.72
0.01456	79.17	-79.17
0.0146	68.79	-68.79
0.01464	39.05	-39.05
0.01468	66.1	-66.1
0.01472	56.48	-56.48
0.01476	70.96	-70.96
0.0148	75.35	-75.35
0.01484	70.99	-70.99
0.01488	58.56	-58.56
0.01492	45.55	-45.55
0.01496	54.34	-54.34
0.015	40.61	-40.61
0.01504	45.15	-45.15
0.01508	45.24	-45.24
0.01512	68.15	-68.15
0.01516	50.52	-50.52
0.0152	66.56	-66.56
0.01524	73.07	-73.07
0.01528	66.13	-66.13
0.01532	74.05	-74.05
0.01536	47.11	-47.11
0.0154	53.41	-53.41
0.01544	55.73	-55.73
0.01548	43.62	-43.62
0.01552	37.23	-37.23
0.01556	46.88	-46.88
0.0156	54.86	-54.86
0.01564	45.81	-45.81
0.01568	21.45	-21.45
0.01572	43.62	-43.62
0.01576	34.37	-34.37
0.0158	42.61	-42.61
0.01584	51.62	-51.62
0.01588	41.25	-41.25
0.01592	39.11	-39.11
0.01596	26.77	-26.77
0.016	37.95	-37.95
0.01604	39.51	-39.51
0.01608	52.26	-52.26
0.01612	55.76	-55.76
0.01616	61.33	-61.33
0.0162	39.66	-39.66
0.01624	51.54	-51.54
0.01628	44.17	-44.17
0.01632	28.3	-28.3
0.01636	44.37	-44.37
0.0164	34.8	-34.8
0.01644	44.05	-44.05
0.01648	21.65	-21.65
0.01652	40.41	-40.41
0.01656	32.63	-32.63
0.0166	25.87	-25.87
0.01664	32.2	-32.2
0.01668	27.89	-27.89
0.01672	61.51	-61.51
0.01676	43.18	-43.18
0.0168	55.12	-55.12
0.01684	34.48	-34.48
0.01688	55.52	-55.52
0.01692	15.24	-15.24
0.01696	37.69	-37.69
0.017	33.91	-33.91
0.01704	34.66	-34.66
0.01708	19.34	-19.34
0.01712	26.13	-26.13
0.01716	28.62	-28.62
0.0172	19.11	-19.11
0.01724	37.35	-37.35
0.01728	45.61	-45.61
0.01732	29.28	-29.28
0.01736	31.04	-31.04
0.0174	17.98	-17.98
0.01744	29.54	-29.54
0.01748	41.42	-41.42
0.01752	30.24	-30.24
0.01756	38.24	-38.24
0.0176	20.9	-20.9
0.01764	34.14	-34.14
0.01768	35.12	-35.12
0.01772	35.03	-35.03
0.01776	25.41	-25.41
0.0178	28.62	-28.62
0.01784	29.28	-29.28
0.01788	35.93	-35.93
0.01792	31.54	-31.54
0.01796	49.17	-49.17
0.018	21.22	-21.22
0.01804	23.42	-23.42
0.01808	33.04	-33.04
0.01812	20.32	-20.32
0.01816	47.49	-47.49
0.0182	3.82	-3.82
0.01824	8.126	-8.126
0.01828	32.46	-32.46
0.01832	33.67	-33.67
0.01836	35.18	-35.18
0.0184	30.09	-30.09
0.01844	21.68	-21.68
0.01848	29.98	-29.98
0.01852	39.43	-39.43
0.01856	25.58	-25.58
0.0186	31.8	-31.8
0.01864	20.29	-20.29
0.01868	23.39	-23.39
0.01872	21.28	-21.28
0.01876	6.103	-6.103
0.0188	21.39	-21.39
0.01884	13.18	-13.18
0.01888	23.07	-23.07
0.01892	17.66	-17.66
0.01896	31.8	-31.8
0.019	24.77	-24.77
0.01904	29.6	-29.6
0.01908	14.4	-14.4
0.01912	9.282	-9.282
0.01916	20.55	-20.55
0.0192	36.62	-36.62
0.01924	25.47	-25.47
0.01928	24.46	-24.46
0.01932	25.87	-25.87
0.01936	37.52	-37.52
0.0194	31.16	-31.16
0.01944	27.03	-27.03
0.01948	41.71	-41.71
0.01952	25.38	-25.38
0.01956	16.71	-16.71
0.0196	30	-30
0.01964	23.3	-23.3
0.01968	32.17	-32.17
0.01972	23.42	-23.42
0.01976	36.1	-36.1
0.0198	31.8	-31.8
0.01984	24.48	-24.48
0.01988	12.26	-12.26
0.01992	25.96	-25.96
0.01996	29.54	-29.54
0.02	27.72	-27.72
0.02004	44.28	-44.28
0.02008	26.48	-26.48
0.02012	31.62	-31.62
0.02016	9.514	-9.514
0.0202	30.26	-30.26
0.02024	23.82	-23.82
0.02028	29.05	-29.05
0.02032	32.26	-32.26
0.02036	27.87	-27.87
0.0204	5.67	-5.67
0.02044	15.06	-15.06
0.02048	17.69	-17.69
0.02052	27.98	-27.98
0.02056	3.849	-3.849
0.0206	10.67	-10.67
0.02064	27.06	-27.06
0.02068	22.06	-22.06
0.02072	36.57	-36.57
0.02076	25.06	-25.06
0.0208	30.18	-30.18
0.02084	15.47	-15.47
0.02088	18.15	-18.15
0.02092	42.32	-42.32
0.02096	17.58	-17.58
0.021	23.88	-23.88
0.02104	25.73	-25.73
0.02108	24.89	-24.89
0.02112	23.82	-23.82
0.02116	22.84	-22.84
0.0212	29.57	-29.57
0.02124	12.2	-12.2
0.02128	16.85	-16.85
0.02132	34.31	-34.31
0.02136	29.8	-29.8
0.0214	20.55	-20.55
0.02144	40.03	-40.03
0.02148	23.88	-23.88
0.02152	27.95	-27.95
0.02156	23.62	-23.62
0.0216	19.86	-19.86
0.02164	11.59	-11.59
0.02168	17.89	-17.89
0.02172	24.31	-24.31
0.02176	23.42	-23.42
0.0218	27.49	-27.49
0.02184	5.814	-5.814
0.02188	17.14	-17.14
0.02192	12.06	-12.06
0.02196	26.71	-26.71
0.022	21.83	-21.83
0.02204	18.27	-18.27
0.02208	-7.509	7.509
0.02212	-6.989	6.989
0.02216	44.34	-44.34
0.0222	21.71	-21.71
0.02224	62.88m	-0.06288
0.02228	-61.44	61.44
0.02232	-18.2	18.2
0.02236	48.93	-48.93
0.0224	3.3	-3.3
0.02244	-31.15	31.15
0.02248	9.947	-9.947
0.02252	-5.804	5.804
0.02256	-12.57	12.57
0.0226	-30.98	30.98
0.02264	-10.46	10.46
0.02268	24.86	-24.86
0.02272	-20.02	20.02
0.02276	-22.02	22.02
0.0228	-17.83	17.83
0.02284	19.86	-19.86
0.02288	-5.949	5.949
0.02292	-20.75	20.75
0.02296	-10.25	10.25
0.023	20.32	-20.32
0.02304	-81.63m	0.08163
0.02308	-22.48	22.48
0.02312	-8.232	8.232
0.02316	20.32	-20.32
0.0232	-12.54	12.54
0.02324	-14.82	14.82
0.02328	-10.66	10.66
0.02332	14.2	-14.2
0.02336	19.08	-19.08
0.0234	12.4	-12.4
0.02344	9.398	-9.398
0.02348	6.306	-6.306
0.02352	17.95	-17.95
0.02356	2.259	-2.259
0.0236	21.36	-21.36
0.02364	-5.255	5.255
0.02368	13.13	-13.13
0.02372	22.87	-22.87
0.02376	16.02	-16.02
0.0238	18.65	-18.65
0.02384	11.77	-11.77
0.02388	17.95	-17.95
0.02392	6.392	-6.392
0.02396	6.652	-6.652
0.024	13.82	-13.82
0.02404	31.42	-31.42
0.02408	26.22	-26.22
0.02412	14.89	-14.89
0.02416	323m	-0.323
0.0242	7.404	-7.404
0.02424	2.462	-2.462
0.02428	15.76	-15.76
0.02432	25.18	-25.18
0.02436	18.5	-18.5
0.0244	18.99	-18.99
0.02444	12.23	-12.23
0.02448	3.04	-3.04
0.02452	2.751	-2.751
0.02456	13.7	-13.7
0.0246	1.566	-1.566
0.02464	27.81	-27.81
0.02468	-1.584	1.584
0.02472	11.1	-11.1
0.02476	16.8	-16.8
0.0248	11.13	-11.13
0.02484	13.99	-13.99
0.02488	22.95	-22.95
0.02492	16.05	-16.05
0.02496	-919.8m	0.9198
0.025	14.31	-14.31
0.02504	25.84	-25.84
0.02508	24.46	-24.46
0.02512	22.75	-22.75
0.02516	44.72	-44.72
0.0252	40.55	-40.55
0.02524	11.42	-11.42
0.02528	30.09	-30.09
0.02532	38.41	-38.41
0.02536	18.62	-18.62
0.0254	10.67	-10.67
0.02544	18.5	-18.5
0.02548	25.09	-25.09
0.02552	45.78	-45.78
0.02556	9.138	-9.138
0.0256	30.29	-30.29
0.02564	35.61	-35.61
0.02568	47.4	-47.4
0.02572	21.25	-21.25
0.02576	45.76	-45.76
0.0258	21.13	-21.13
0.02584	43.15	-43.15
0.02588	12.52	-12.52
0.02592	26.62	-26.62
0.02596	19.37	-19.37
0.026	41.1	-41.1
0.02604	42.89	-42.89
0.02608	10.03	-10.03
0.02612	11.28	-11.28
0.02616	25.73	-25.73
0.0262	25.32	-25.32
0.02624	30.26	-30.26
0.02628	28.88	-28.88
0.02632	35.58	-35.58
0.02636	24.83	-24.83
0.0264	26.42	-26.42
0.02644	7.664	-7.664
0.02648	30.81	-30.81
0.02652	42.98	-42.98
0.02656	32.58	-32.58
0.0266	32.84	-32.84
0.02664	15.18	-15.18
0.02668	43.44	-43.44
0.02672	36.71	-36.71
0.02676	34.66	-34.66
0.0268	31.31	-31.31
0.02684	37.98	-37.98
0.02688	46.74	-46.74
0.02692	33.67	-33.67
0.02696	5.034	-5.034
0.027	21.42	-21.42
0.02704	22.37	-22.37
0.02708	28.04	-28.04
0.02712	51.77	-51.77
0.02716	41.62	-41.62
0.0272	30.12	-30.12
0.02724	39.57	-39.57
0.02728	40	-40
0.02732	59.05	-59.05
0.02736	45.99	-45.99
0.0274	23.42	-23.42
0.02744	32.78	-32.78
0.02748	16.07	-16.07
0.02752	28.33	-28.33
0.02756	34.6	-34.6
0.0276	30.38	-30.38
0.02764	10.09	-10.09
0.02768	39.43	-39.43
0.02772	57.23	-57.23
0.02776	31.45	-31.45
0.0278	49.6	-49.6
0.02784	34.89	-34.89
0.02788	39.66	-39.66
0.02792	54.25	-54.25
0.02796	42.84	-42.84
0.028	37.66	-37.66
0.02804	11.48	-11.48
0.02808	26.42	-26.42
0.02812	39.48	-39.48
0.02816	37.58	-37.58
0.0282	35.81	-35.81
0.02824	44.14	-44.14
0.02828	45.03	-45.03
0.02832	25.52	-25.52
0.02836	50.21	-50.21
0.0284	34.95	-34.95
0.02844	38.13	-38.13
0.02848	36.65	-36.65
0.02852	36.94	-36.94
0.02856	30.26	-30.26
0.0286	27.69	-27.69
0.02864	46.68	-46.68
0.02868	34.89	-34.89
0.02872	36.42	-36.42
0.02876	11.59	-11.59
0.0288	37.52	-37.52
0.02884	38.41	-38.41
0.02888	38.04	-38.04
0.02892	39.2	-39.2
0.02896	37.95	-37.95
0.029	44.92	-44.92
0.02904	27.75	-27.75
0.02908	25.32	-25.32
0.02912	33.39	-33.39
0.02916	28.82	-28.82
0.0292	45.67	-45.67
0.02924	31.85	-31.85
0.02928	33.5	-33.5
0.02932	28.33	-28.33
0.02936	20.81	-20.81
0.0294	22.98	-22.98
0.02944	42.72	-42.72
0.02948	18.42	-18.42
0.02952	22.89	-22.89
0.02956	44.86	-44.86
0.0296	33.39	-33.39
0.02964	27.95	-27.95
0.02968	26.36	-26.36
0.02972	42.09	-42.09
0.02976	43.18	-43.18
0.0298	27.98	-27.98
0.02984	34.66	-34.66
0.02988	38.91	-38.91
0.02992	28.5	-28.5
0.02996	21.97	-21.97
0.03	45.21	-45.21
0.03004	33.96	-33.96
0.03008	16.1	-16.1
0.03012	33.13	-33.13
0.03016	38.67	-38.67
0.0302	27.26	-27.26
0.03024	26.88	-26.88
0.03028	27.2	-27.2
0.03032	31.74	-31.74
0.03036	35.47	-35.47
0.0304	36.45	-36.45
0.03044	33.88	-33.88
0.03048	33.5	-33.5
0.03052	47.89	-47.89
0.03056	31.57	-31.57
0.0306	34.74	-34.74
0.03064	31.94	-31.94
0.03068	32.29	-32.29
0.03072	14.66	-14.66
0.03076	55.67	-55.67
0.0308	32.75	-32.75
0.03084	30.64	-30.64
0.03088	41.28	-41.28
0.03092	27.32	-27.32
0.03096	32.89	-32.89
0.031	31.33	-31.33
0.03104	38.27	-38.27
0.03108	34.22	-34.22
0.03112	44.46	-44.46
0.03116	32.55	-32.55
0.0312	37.06	-37.06
0.03124	27.78	-27.78
0.03128	39.4	-39.4
0.03132	34.89	-34.89
0.03136	51.68	-51.68
0.0314	38.21	-38.21
0.03144	33.13	-33.13
0.03148	32.75	-32.75
0.03152	43.24	-43.24
0.03156	17.72	-17.72
0.0316	20.73	-20.73
0.03164	38.76	-38.76
0.03168	49.11	-49.11
0.03172	28.41	-28.41
0.03176	31.83	-31.83
0.0318	37.75	-37.75
0.03184	28.13	-28.13
0.03188	28.88	-28.88
0.03192	20.61	-20.61
0.03196	42.87	-42.87
0.032	29.86	-29.86
0.03204	30.21	-30.21
0.03208	48.76	-48.76
0.03212	49.19	-49.19
0.03216	57.26	-57.26
0.0322	119.4	-119.4
0.03224	90.29	-90.29
0.03228	57.29	-57.29
0.03232	43.73	-43.73
0.03236	76.85	-76.85
0.0324	104.7	-104.7
0.03244	98.44	-98.44
0.03248	50.96	-50.96
0.03252	36.88	-36.88
0.03256	64.95	-64.95
0.0326	96.8	-96.8
0.03264	49.19	-49.19
0.03268	72.43	-72.43
0.03272	93.88	-93.88
0.03276	82.66	-82.66
0.0328	59.22	-59.22
0.03284	69.4	-69.4
0.03288	87.46	-87.46
0.03292	103.8	-103.8
0.03296	88.38	-88.38
0.033	62.06	-62.06
0.03304	47.32	-47.32
0.03308	53.56	-53.56
0.03312	89.22	-89.22
0.03316	59.4	-59.4
0.0332	62.34	-62.34
0.03324	76.91	-76.91
0.03328	78.96	-78.96
0.03332	68.56	-68.56
0.03336	41.13	-41.13
0.0334	59.63	-59.63
0.03344	57.92	-57.92
0.03348	56.02	-56.02
0.03352	31.62	-31.62
0.03356	64.89	-64.89
0.0336	83.27	-83.27
0.03364	81.48	-81.48
0.03368	44.11	-44.11
0.03372	57.43	-57.43
0.03376	54.17	-54.17
0.0338	85.41	-85.41
0.03384	70.32	-70.32
0.03388	57.2	-57.2
0.03392	35.06	-35.06
0.03396	42.17	-42.17
0.034	76.65	-76.65
0.03404	61.3	-61.3
0.03408	63.36	-63.36
0.03412	67.2	-67.2
0.03416	65.06	-65.06
0.0342	64.11	-64.11
0.03424	80.47	-80.47
0.03428	43.27	-43.27
0.03432	62.58	-62.58
0.03436	31.74	-31.74
0.0344	48.41	-48.41
0.03444	50.38	-50.38
0.03448	87.81	-87.81
0.03452	100.3	-100.3
0.03456	73.76	-73.76
0.0346	55.24	-55.24
0.03464	33.65	-33.65
0.03468	51.94	-51.94
0.03472	60.18	-60.18
0.03476	75.93	-75.93
0.0348	79.69	-79.69
0.03484	57.32	-57.32
0.03488	61.8	-61.8
0.03492	46.82	-46.82
0.03496	58.5	-58.5
0.035	70.55	-70.55
0.03504	35.93	-35.93
0.03508	47.14	-47.14
0.03512	48.18	-48.18
0.03516	44.95	-44.95
0.0352	56.07	-56.07
0.03524	42.49	-42.49
0.03528	65.5	-65.5
0.03532	55.58	-55.58
0.03536	50.35	-50.35
0.0354	42.81	-42.81
0.03544	61.33	-61.33
0.03548	47.72	-47.72
0.03552	47.98	-47.98
0.03556	49.11	-49.11
0.0356	47.37	-47.37
0.03564	48.65	-48.65
0.03568	34.31	-34.31
0.03572	52.69	-52.69
0.03576	47.46	-47.46
0.0358	41.02	-41.02
0.03584	14.28	-14.28
0.03588	42.69	-42.69
0.03592	24.98	-24.98
0.03596	48.79	-48.79
0.036	46.85	-46.85
0.03604	39.17	-39.17
0.03608	22.32	-22.32
0.03612	26.45	-26.45
0.03616	49.28	-49.28
0.0362	51.42	-51.42
0.03624	55.81	-55.81
0.03628	38.33	-38.33
0.03632	50.38	-50.38
0.03636	46.28	-46.28
0.0364	26.31	-26.31
0.03644	42.95	-42.95
0.03648	54.92	-54.92
0.03652	30.81	-30.81
0.03656	44.17	-44.17
0.0366	23.73	-23.73
0.03664	39.11	-39.11
0.03668	21.94	-21.94
0.03672	48.76	-48.76
0.03676	42.14	-42.14
0.0368	34.31	-34.31
0.03684	40.47	-40.47
0.03688	46.39	-46.39
0.03692	37.89	-37.89
0.03696	21.88	-21.88
0.037	65.78	-65.78
0.03704	31.07	-31.07
0.03708	25.38	-25.38
0.03712	29.89	-29.89
0.03716	26.97	-26.97
0.0372	32.4	-32.4
0.03724	30.61	-30.61
0.03728	36.51	-36.51
0.03732	25.78	-25.78
0.03736	26.83	-26.83
0.0374	54.54	-54.54
0.03744	25.24	-25.24
0.03748	39.22	-39.22
0.03752	26.13	-26.13
0.03756	33.15	-33.15
0.0376	42.75	-42.75
0.03764	28.99	-28.99
0.03768	22.61	-22.61
0.03772	12.29	-12.29
0.03776	56.48	-56.48
0.0378	8.386	-8.386
0.03784	52.49	-52.49
0.03788	43.47	-43.47
0.03792	11.65	-11.65
0.03796	28.47	-28.47
0.038	30.38	-30.38
0.03804	42.66	-42.66
0.03808	21.22	-21.22
0.03812	33.5	-33.5
0.03816	22.69	-22.69
0.0382	23.82	-23.82
0.03824	20.58	-20.58
0.03828	21.51	-21.51
0.03832	24.66	-24.66
0.03836	18.5	-18.5
0.0384	15	-15
0.03844	26.02	-26.02
0.03848	29.6	-29.6
0.03852	31.8	-31.8
0.03856	33.67	-33.67
0.0386	27.61	-27.61
0.03864	20.29	-20.29
0.03868	23.15	-23.15
0.03872	16.05	-16.05
0.03876	14.95	-14.95
0.0388	26.62	-26.62
0.03884	37.26	-37.26
0.03888	10.84	-10.84
0.03892	40.32	-40.32
0.03896	12.06	-12.06
0.039	26.65	-26.65
0.03904	31.02	-31.02
0.03908	28.59	-28.59
0.03912	29.95	-29.95
0.03916	13.16	-13.16
0.0392	30.18	-30.18
0.03924	29.14	-29.14
0.03928	47.06	-47.06
0.03932	7.779	-7.779
0.03936	25.24	-25.24
0.0394	23.13	-23.13
0.03944	18.85	-18.85
0.03948	14.74	-14.74
0.03952	26.05	-26.05
0.03956	20.32	-20.32
0.0396	27.55	-27.55
0.03964	23.5	-23.5
0.03968	34.43	-34.43
0.03972	26.05	-26.05
0.03976	25.18	-25.18
0.0398	21.51	-21.51
0.03984	24.2	-24.2
0.03988	35.41	-35.41
0.03992	27.35	-27.35
0.03996	24.89	-24.89
0.04	35.06	-35.06
0.04004	24.25	-24.25
0.04008	16.77	-16.77
0.04012	16.48	-16.48
0.04016	39.57	-39.57
0.0402	4.976	-4.976
0.04024	22.49	-22.49
0.04028	39.08	-39.08
0.04032	26.91	-26.91
0.04036	25.09	-25.09
0.0404	4.311	-4.311
0.04044	33.79	-33.79
0.04048	44.14	-44.14
0.04052	13.68	-13.68
0.04056	34.02	-34.02
0.0406	47.98	-47.98
0.04064	16.1	-16.1
0.04068	28.18	-28.18
0.04072	32.46	-32.46
0.04076	37.75	-37.75
0.0408	32.09	-32.09
0.04084	16.8	-16.8
0.04088	24.37	-24.37
0.04092	23.21	-23.21
0.04096	17.63	-17.63
0.041	14.28	-14.28
0.04104	1.537	-1.537
0.04108	31.13	-31.13
0.04112	39.66	-39.66
0.04116	21.36	-21.36
0.0412	4.658	-4.658
0.04124	35.12	-35.12
0.04128	23.99	-23.99
0.04132	28.36	-28.36
0.04136	20.35	-20.35
0.0414	41.83	-41.83
0.04144	27.29	-27.29
0.04148	35.58	-35.58
0.04152	39.05	-39.05
0.04156	35.67	-35.67
0.0416	34.4	-34.4
0.04164	6.566	-6.566
0.04168	17.35	-17.35
0.04172	36.45	-36.45
0.04176	27	-27
0.0418	31.71	-31.71
0.04184	34.57	-34.57
0.04188	24.28	-24.28
0.04192	30.73	-30.73
0.04196	25.29	-25.29
0.042	32.81	-32.81
0.04204	21.31	-21.31
0.04208	12.55	-12.55
0.04212	13.94	-13.94
0.04216	-4.764	4.764
0.0422	32.11	-32.11
0.04224	2.346	-2.346
0.04228	-15.66	15.66
0.04232	-42.54	42.54
0.04236	-41.76	41.76
0.0424	13.65	-13.65
0.04244	62.88m	-0.06288
0.04248	-21.38	21.38
0.04252	15.76	-15.76
0.04256	120.7m	-0.1207
0.0426	-16.87	16.87
0.04264	-39.53	39.53
0.04268	-28.64	28.64
0.04272	-2.683	2.683
0.04276	-14.07	14.07
0.0428	-20.57	20.57
0.04284	13.76	-13.76
0.04288	-25.89	25.89
0.04292	-7.162	7.162
0.04296	-3.983	3.983
0.043	-833.1m	0.8331
0.04304	-12.28	12.28
0.04308	-33.58	33.58
0.04312	27.52	-27.52
0.04316	-19.56	19.56
0.0432	6.479	-6.479
0.04324	-25.6	25.6
0.04328	-20.51	20.51
0.04332	51.33	-51.33
0.04336	12.4	-12.4
0.0434	10.99	-10.99
0.04344	4.86	-4.86
0.04348	-6.324	6.324
0.04352	3.213	-3.213
0.04356	18.39	-18.39
0.0436	13.91	-13.91
0.04364	6.306	-6.306
0.04368	17.35	-17.35
0.04372	-5.342	5.342
0.04376	5.583	-5.583
0.0438	7.519	-7.519
0.04384	36.13	-36.13
0.04388	21.85	-21.85
0.04392	16.31	-16.31
0.04396	13.91	-13.91
0.044	29.74	-29.74
0.04404	25.99	-25.99
0.04408	21.02	-21.02
0.04412	-7.423	7.423
0.04416	14.54	-14.54
0.0442	12.87	-12.87
0.04424	19.6	-19.6
0.04428	17.78	-17.78
0.04432	4.976	-4.976
0.04436	24.46	-24.46
0.0444	23.53	-23.53
0.04444	18.47	-18.47
0.04448	-29.62	29.62
0.04452	28.79	-28.79
0.04456	21.28	-21.28
0.0446	17.14	-17.14
0.04464	-6.584	6.584
0.04468	-7.885	7.885
0.04472	120.7m	-0.1207
0.04476	28.73	-28.73
0.0448	9.86	-9.86
0.04484	380.8m	-0.3808
0.04488	21.1	-21.1
0.04492	11.68	-11.68
0.04496	33.18	-33.18
0.045	-1.035	1.035
0.04504	24.11	-24.11
0.04508	26.65	-26.65
0.04512	27.35	-27.35
0.04516	22.29	-22.29
0.0452	-717.5m	0.7175
0.04524	37.14	-37.14
0.04528	5.121	-5.121
0.04532	17.4	-17.4
0.04536	-11.41	11.41
0.0454	16.94	-16.94
0.04544	15.61	-15.61
0.04548	14.74	-14.74
0.04552	18.13	-18.13
0.04556	48.04	-48.04
0.0456	35.32	-35.32
0.04564	20.41	-20.41
0.04568	37.63	-37.63
0.04572	45.84	-45.84
0.04576	16.25	-16.25
0.0458	12.58	-12.58
0.04584	17.26	-17.26
0.04588	20.41	-20.41
0.04592	30.03	-30.03
0.04596	37.26	-37.26
0.046	30.67	-30.67
0.04604	6.045	-6.045
0.04608	37.55	-37.55
0.04612	22.63	-22.63
0.04616	18.96	-18.96
0.0462	27.72	-27.72
0.04624	30.61	-30.61
0.04628	42.75	-42.75
0.04632	20.29	-20.29
0.04636	21.45	-21.45
0.0464	23.21	-23.21
0.04644	48.88	-48.88
0.04648	15.84	-15.84
0.04652	49.31	-49.31
0.04656	22.63	-22.63
0.0466	39.08	-39.08
0.04664	30.99	-30.99
0.04668	47.92	-47.92
0.04672	28.79	-28.79
0.04676	28.33	-28.33
0.0468	57.98	-57.98
0.04684	25.24	-25.24
0.04688	34.95	-34.95
0.04692	21.33	-21.33
0.04696	55.41	-55.41
0.047	29.69	-29.69
0.04704	36.77	-36.77
0.04708	40.52	-40.52
0.04712	-4.821	4.821
0.04716	21.16	-21.16
0.0472	11.13	-11.13
0.04724	35.64	-35.64
0.04728	37.63	-37.63
0.04732	12.92	-12.92
0.04736	26.36	-26.36
0.0474	30.41	-30.41
0.04744	47.72	-47.72
0.04748	35.18	-35.18
0.04752	31.16	-31.16
0.04756	39.48	-39.48
0.0476	32.49	-32.49
0.04764	35.84	-35.84
0.04768	40.29	-40.29
0.04772	41.56	-41.56
0.04776	24.37	-24.37
0.0478	43.1	-43.1
0.04784	5.207	-5.207
0.04788	55.52	-55.52
0.04792	34.05	-34.05
0.04796	35.09	-35.09
0.048	29.57	-29.57
0.04804	24.22	-24.22
0.04808	46.68	-46.68
0.04812	33.41	-33.41
0.04816	34.95	-34.95
0.0482	25.47	-25.47
0.04824	34.89	-34.89
0.04828	37.03	-37.03
0.04832	37.17	-37.17
0.04836	41.48	-41.48
0.0484	19.2	-19.2
0.04844	12.95	-12.95
0.04848	39.34	-39.34
0.04852	46.77	-46.77
0.04856	13.01	-13.01
0.0486	43.62	-43.62
0.04864	42.23	-42.23
0.04868	45.47	-45.47
0.04872	22.69	-22.69
0.04876	32.26	-32.26
0.0488	49.25	-49.25
0.04884	38.15	-38.15
0.04888	25.7	-25.7
0.04892	33.99	-33.99
0.04896	15.84	-15.84
0.049	33.39	-33.39
0.04904	32.35	-32.35
0.04908	40.09	-40.09
0.04912	41.91	-41.91
0.04916	33.82	-33.82
0.0492	42.37	-42.37
0.04924	36.19	-36.19
0.04928	37.61	-37.61
0.04932	39.2	-39.2
0.04936	23.27	-23.27
0.0494	46.33	-46.33
0.04944	39.8	-39.8
0.04948	32.95	-32.95
0.04952	29.69	-29.69
0.04956	43.62	-43.62
0.0496	45.87	-45.87
0.04964	36.97	-36.97
0.04968	13.76	-13.76
0.04972	17.75	-17.75
0.04976	42.09	-42.09
0.0498	21.65	-21.65
0.04984	23.82	-23.82
0.04988	31.71	-31.71
0.04992	28.36	-28.36
0.04996	27.63	-27.63
0.05	22.37	-22.37
0.05004	30.76	-30.76
0.05008	44.11	-44.11
0.05012	39.57	-39.57
0.05016	32.89	-32.89
0.0502	40.87	-40.87
0.05024	27.4	-27.4
0.05028	31.85	-31.85
0.05032	31.22	-31.22
0.05036	31.51	-31.51
0.0504	30.81	-30.81
0.05044	48.36	-48.36
0.05048	29.4	-29.4
0.05052	29.46	-29.46
0.05056	50.55	-50.55
0.0506	41.56	-41.56
0.05064	36.8	-36.8
0.05068	32.55	-32.55
0.05072	23.96	-23.96
0.05076	34.43	-34.43
0.0508	46.97	-46.97
0.05084	39.14	-39.14
0.05088	36.22	-36.22
0.05092	42.37	-42.37
0.05096	9.976	-9.976
0.051	23.96	-23.96
0.05104	43.7	-43.7
0.05108	44.86	-44.86
0.05112	24.92	-24.92
0.05116	32.95	-32.95
0.0512	36.62	-36.62
0.05124	31.85	-31.85
0.05128	32.35	-32.35
0.05132	43.7	-43.7
0.05136	45.24	-45.24
0.0514	23.47	-23.47
0.05144	37.92	-37.92
0.05148	33.41	-33.41
0.05152	43.24	-43.24
0.05156	32.37	-32.37
0.0516	31.19	-31.19
0.05164	30.76	-30.76
0.05168	35.87	-35.87
0.05172	43.36	-43.36
0.05176	25.7	-25.7
0.0518	31.74	-31.74
0.05184	40.87	-40.87
0.05188	29.92	-29.92
0.05192	31.45	-31.45
0.05196	41.54	-41.54
0.052	43.93	-43.93
0.05204	45.15	-45.15
0.05208	60.73	-60.73
0.05212	93.33	-93.33
0.05216	36.51	-36.51
0.0522	83.07	-83.07
0.05224	92.46	-92.46
0.05228	49.05	-49.05
0.05232	41.56	-41.56
0.05236	96.3	-96.3
0.0524	95.32	-95.32
0.05244	37.49	-37.49
0.05248	42.63	-42.63
0.05252	85.29	-85.29
0.05256	90.06	-90.06
0.0526	67.81	-67.81
0.05264	26.42	-26.42
0.05268	60.78	-60.78
0.05272	82.4	-82.4
0.05276	100.3	-100.3
0.0528	48.73	-48.73
0.05284	57.49	-57.49
0.05288	78.7	-78.7
0.05292	85.55	-85.55
0.05296	54.66	-54.66
0.053	71.25	-71.25
0.05304	60.99	-60.99
0.05308	70.12	-70.12
0.05312	52.58	-52.58
0.05316	56.71	-56.71
0.0532	71.71	-71.71
0.05324	92.26	-92.26
0.05328	98.79	-98.79
0.05332	43.82	-43.82
0.05336	30.84	-30.84
0.0534	62.78	-62.78
0.05344	74.28	-74.28
0.05348	41.56	-41.56
0.05352	50.09	-50.09
0.05356	87.98	-87.98
0.0536	101.6	-101.6
0.05364	99.83	-99.83
0.05368	68.21	-68.21
0.05372	48.93	-48.93
0.05376	46.13	-46.13
0.0538	68.59	-68.59
0.05384	60.93	-60.93
0.05388	79.17	-79.17
0.05392	71.1	-71.1
0.05396	72.46	-72.46
0.054	40	-40
0.05404	37.69	-37.69
0.05408	59.19	-59.19
0.05412	62.46	-62.46
0.05416	85.81	-85.81
0.0542	83.73	-83.73
0.05424	31.74	-31.74
0.05428	57.32	-57.32
0.05432	62.37	-62.37
0.05436	65.21	-65.21
0.0544	83.27	-83.27
0.05444	58.33	-58.33
0.05448	70.76	-70.76
0.05452	61.8	-61.8
0.05456	34.25	-34.25
0.0546	77.32	-77.32
0.05464	65.47	-65.47
0.05468	90.78	-90.78
0.05472	64.05	-64.05
0.05476	70.76	-70.76
0.0548	55.93	-55.93
0.05484	47.35	-47.35
0.05488	74.77	-74.77
0.05492	43.47	-43.47
0.05496	68.59	-68.59
0.055	42.87	-42.87
0.05504	56.04	-56.04
0.05508	37.4	-37.4
0.05512	45.47	-45.47
0.05516	49.02	-49.02
0.0552	60.73	-60.73
0.05524	46.02	-46.02
0.05528	45.26	-45.26
0.05532	57.95	-57.95
0.05536	45.58	-45.58
0.0554	38.39	-38.39
0.05544	21.65	-21.65
0.05548	46.85	-46.85
0.05552	45.76	-45.76
0.05556	61.77	-61.77
0.0556	61.19	-61.19
0.05564	49.72	-49.72
0.05568	43.27	-43.27
0.05572	38.01	-38.01
0.05576	53.53	-53.53
0.0558	58.73	-58.73
0.05584	44.95	-44.95
0.05588	49.14	-49.14
0.05592	18.76	-18.76
0.05596	34.2	-34.2
0.056	44.98	-44.98
0.05604	45.73	-45.73
0.05608	67.78	-67.78
0.05612	41.39	-41.39
0.05616	49.8	-49.8
0.0562	30.61	-30.61
0.05624	33.3	-33.3
0.05628	38.88	-38.88
0.05632	51.1	-51.1
0.05636	36.22	-36.22
0.0564	29.8	-29.8
0.05644	27.03	-27.03
0.05648	45.7	-45.7
0.05652	58.93	-58.93
0.05656	14.57	-14.57
0.0566	42.26	-42.26
0.05664	32.06	-32.06
0.05668	37.43	-37.43
0.05672	31.42	-31.42
0.05676	20.61	-20.61
0.0568	37.23	-37.23
0.05684	45.81	-45.81
0.05688	45.78	-45.78
0.05692	33.36	-33.36
0.05696	24.89	-24.89
0.057	51.3	-51.3
0.05704	37.46	-37.46
0.05708	48.13	-48.13
0.05712	22.63	-22.63
0.05716	36.94	-36.94
0.0572	37.92	-37.92
0.05724	29.86	-29.86
0.05728	38.79	-38.79
0.05732	7.577	-7.577
0.05736	39.51	-39.51
0.0574	44.92	-44.92
0.05744	12.81	-12.81
0.05748	21.74	-21.74
0.05752	30.44	-30.44
0.05756	35.76	-35.76
0.0576	32.14	-32.14
0.05764	30	-30
0.05768	42.43	-42.43
0.05772	29.25	-29.25
0.05776	29.63	-29.63
0.0578	18.24	-18.24
0.05784	27.2	-27.2
0.05788	15.52	-15.52
0.05792	29.25	-29.25
0.05796	11.97	-11.97
0.058	35.61	-35.61
0.05804	49.51	-49.51
0.05808	22.81	-22.81
0.05812	34.83	-34.83
0.05816	46.25	-46.25
0.0582	18.99	-18.99
0.05824	16.91	-16.91
0.05828	16.74	-16.74
0.05832	32.89	-32.89
0.05836	39.22	-39.22
0.0584	16.22	-16.22
0.05844	38.82	-38.82
0.05848	16.94	-16.94
0.05852	12.4	-12.4
0.05856	30.26	-30.26
0.0586	12.55	-12.55
0.05864	34.74	-34.74
0.05868	20.73	-20.73
0.05872	11.59	-11.59
0.05876	33.1	-33.1
0.0588	44.54	-44.54
0.05884	35.32	-35.32
0.05888	17.37	-17.37
0.05892	25.41	-25.41
0.05896	23.42	-23.42
0.059	24.4	-24.4
0.05904	17.55	-17.55
0.05908	25.24	-25.24
0.05912	29.66	-29.66
0.05916	26.94	-26.94
0.0592	14.48	-14.48
0.05924	18.07	-18.07
0.05928	22.35	-22.35
0.05932	20.15	-20.15
0.05936	22.17	-22.17
0.0594	21.97	-21.97
0.05944	23.42	-23.42
0.05948	24.11	-24.11
0.05952	8.126	-8.126
0.05956	18.85	-18.85
0.0596	31.16	-31.16
0.05964	25.5	-25.5
0.05968	15.24	-15.24
0.05972	34.92	-34.92
0.05976	15.79	-15.79
0.0598	10.35	-10.35
0.05984	37.37	-37.37
0.05988	15.21	-15.21
0.05992	25.12	-25.12
0.05996	23.62	-23.62
0.06	29.31	-29.31
0.06004	10.32	-10.32
0.06008	18.44	-18.44
0.06012	35.67	-35.67
0.06016	32.63	-32.63
0.0602	24.69	-24.69
0.06024	16.13	-16.13
0.06028	32.35	-32.35
0.06032	23.04	-23.04
0.06036	16.83	-16.83
0.0604	35.84	-35.84
0.06044	33.7	-33.7
0.06048	24.92	-24.92
0.06052	34.83	-34.83
0.06056	27	-27
0.0606	27.61	-27.61
0.06064	30.18	-30.18
0.06068	20.7	-20.7
0.06072	24.95	-24.95
0.06076	26.25	-26.25
0.0608	27.92	-27.92
0.06084	8.04	-8.04
0.06088	4.254	-4.254
0.06092	26.65	-26.65
0.06096	24.28	-24.28
0.061	37.23	-37.23
0.06104	26.33	-26.33
0.06108	29.28	-29.28
0.06112	35.24	-35.24
0.06116	36.59	-36.59
0.0612	40.93	-40.93
0.06124	32.17	-32.17
0.06128	26.65	-26.65
0.06132	23.15	-23.15
0.06136	35.7	-35.7
0.0614	22	-22
0.06144	26.31	-26.31
0.06148	23.76	-23.76
0.06152	35.96	-35.96
0.06156	27.11	-27.11
0.0616	34.14	-34.14
0.06164	10.47	-10.47
0.06168	27.09	-27.09
0.06172	40.67	-40.67
0.06176	28.91	-28.91
0.0618	36.68	-36.68
0.06184	19.98	-19.98
0.06188	14.08	-14.08
0.06192	40.24	-40.24
0.06196	13.13	-13.13
0.062	50.76	-50.76
0.06204	18.79	-18.79
0.06208	26.74	-26.74
0.06212	37.11	-37.11
0.06216	5.583	-5.583
0.0622	-30.63	30.63
0.06224	5.496	-5.496
0.06228	22.89	-22.89
0.06232	-16.58	16.58
0.06236	-23.03	23.03
0.0624	1.277	-1.277
0.06244	-9.706	9.706
0.06248	-23.84	23.84
0.06252	-39.3	39.3
0.06256	-5.573	5.573
0.0626	52.43	-52.43
0.06264	9.889	-9.889
0.06268	2.982	-2.982
0.06272	-37.45	37.45
0.06276	-5.66	5.66
0.0628	-919.8m	0.9198
0.06284	-20.66	20.66
0.06288	-804.2m	0.8042
0.06292	-5.717	5.717
0.06296	35.99	-35.99
0.063	-29.1	29.1
0.06304	-45.72	45.72
0.06308	-16.09	16.09
0.06312	7.028	-7.028
0.06316	24.6	-24.6
0.0632	17.84	-17.84
0.06324	3.444	-3.444
0.06328	-43.29	43.29
0.06332	-9.764	9.764
0.06336	32.35	-32.35
0.0634	13.7	-13.7
0.06344	21.71	-21.71
0.06348	17.98	-17.98
0.06352	27.46	-27.46
0.06356	9.311	-9.311
0.0636	15.35	-15.35
0.06364	5.641	-5.641
0.06368	7.028	-7.028
0.06372	29.98	-29.98
0.06376	18.3	-18.3
0.0638	22.84	-22.84
0.06384	9.109	-9.109
0.06388	7.837	-7.837
0.06392	-5.717	5.717
0.06396	27.72	-27.72
0.064	24.89	-24.89
0.06404	32.95	-32.95
0.06408	3.242	-3.242
0.06412	-9.937	9.937
0.06416	-7.943	7.943
0.0642	45.52	-45.52
0.06424	16.07	-16.07
0.06428	15.96	-15.96
0.06432	37.81	-37.81
0.06436	-14.01	14.01
0.0644	22.89	-22.89
0.06444	38.24	-38.24
0.06448	29.28	-29.28
0.06452	31.31	-31.31
0.06456	8.126	-8.126
0.0646	14.51	-14.51
0.06464	17.72	-17.72
0.06468	7.519	-7.519
0.06472	-12.34	12.34
0.06476	29.51	-29.51
0.0648	34.4	-34.4
0.06484	18.18	-18.18
0.06488	28.27	-28.27
0.06492	9.571	-9.571
0.06496	13.76	-13.76
0.065	22.69	-22.69
0.06504	22.06	-22.06
0.06508	4.138	-4.138
0.06512	3.473	-3.473
0.06516	26.8	-26.8
0.0652	11.25	-11.25
0.06524	23.88	-23.88
0.06528	20.55	-20.55
0.06532	-659.7m	0.6597
0.06536	4.427	-4.427
0.0654	11.71	-11.71
0.06544	36.16	-36.16
0.06548	4.514	-4.514
0.06552	44.92	-44.92
0.06556	18.88	-18.88
0.0656	39.6	-39.6
0.06564	17.49	-17.49
0.06568	15.29	-15.29
0.06572	14.74	-14.74
0.06576	18.27	-18.27
0.0658	28.68	-28.68
0.06584	26.45	-26.45
0.06588	49.45	-49.45
0.06592	15.9	-15.9
0.06596	-3.781	3.781
0.066	23.91	-23.91
0.06604	32.32	-32.32
0.06608	19.77	-19.77
0.06612	43.33	-43.33
0.06616	29.11	-29.11
0.0662	57.89	-57.89
0.06624	35.15	-35.15
0.06628	15.47	-15.47
0.06632	34.02	-34.02
0.06636	46.45	-46.45
0.0664	32.55	-32.55
0.06644	40	-40
0.06648	24.83	-24.83
0.06652	22.23	-22.23
0.06656	22.32	-22.32
0.0666	20.21	-20.21
0.06664	46.39	-46.39
0.06668	35.7	-35.7
0.06672	27.78	-27.78
0.06676	17.58	-17.58
0.0668	43.85	-43.85
0.06684	30.81	-30.81
0.06688	29.54	-29.54
0.06692	11.22	-11.22
0.06696	26.57	-26.57
0.067	38.1	-38.1
0.06704	29.02	-29.02
0.06708	27.55	-27.55
0.06712	39.83	-39.83
0.06716	30.32	-30.32
0.0672	47.17	-47.17
0.06724	14.08	-14.08
0.06728	22.78	-22.78
0.06732	38.53	-38.53
0.06736	21.16	-21.16
0.0674	53.56	-53.56
0.06744	20.52	-20.52
0.06748	24.66	-24.66
0.06752	39.8	-39.8
0.06756	33.67	-33.67
0.0676	28.85	-28.85
0.06764	25.96	-25.96
0.06768	23.53	-23.53
0.06772	50.47	-50.47
0.06776	31.83	-31.83
0.0678	28.18	-28.18
0.06784	24.98	-24.98
0.06788	39.83	-39.83
0.06792	26.83	-26.83
0.06796	44.4	-44.4
0.068	33.44	-33.44
0.06804	26.33	-26.33
0.06808	30.84	-30.84
0.06812	44.08	-44.08
0.06816	30.99	-30.99
0.0682	39.89	-39.89
0.06824	39.86	-39.86
0.06828	30.9	-30.9
0.06832	34.48	-34.48
0.06836	37.49	-37.49
0.0684	45.47	-45.47
0.06844	39.72	-39.72
0.06848	17.03	-17.03
0.06852	35.52	-35.52
0.06856	18.59	-18.59
0.0686	35.29	-35.29
0.06864	30.61	-30.61
0.06868	43.41	-43.41
0.06872	32.11	-32.11
0.06876	30.06	-30.06
0.0688	36.42	-36.42
0.06884	37.29	-37.29
0.06888	27.89	-27.89
0.06892	36.33	-36.33
0.06896	27.81	-27.81
0.069	20.41	-20.41
0.06904	25.7	-25.7
0.06908	26.33	-26.33
0.06912	46.36	-46.36
0.06916	43.96	-43.96
0.0692	36.54	-36.54
0.06924	32.35	-32.35
0.06928	51.65	-51.65
0.06932	25.32	-25.32
0.06936	35.73	-35.73
0.0694	30.7	-30.7
0.06944	39.98	-39.98
0.06948	28.96	-28.96
0.06952	27.23	-27.23
0.06956	53.67	-53.67
0.0696	45.18	-45.18
0.06964	30.67	-30.67
0.06968	35.32	-35.32
0.06972	29.54	-29.54
0.06976	27.95	-27.95
0.0698	15.15	-15.15
0.06984	25.73	-25.73
0.06988	20.41	-20.41
0.06992	36.91	-36.91
0.06996	38.07	-38.07
0.07	43.13	-43.13
0.07004	32.78	-32.78
0.07008	38.91	-38.91
0.07012	24.51	-24.51
0.07016	23.3	-23.3
0.0702	28.01	-28.01
0.07024	38.62	-38.62
0.07028	39.89	-39.89
0.07032	35.7	-35.7
0.07036	47.4	-47.4
0.0704	50.64	-50.64
0.07044	42.32	-42.32
0.07048	34.46	-34.46
0.07052	37.32	-37.32
0.07056	35.7	-35.7
0.0706	29.48	-29.48
0.07064	25.55	-25.55
0.07068	42.17	-42.17
0.07072	42.26	-42.26
0.07076	34.98	-34.98
0.0708	22.35	-22.35
0.07084	35.81	-35.81
0.07088	36.74	-36.74
0.07092	45.41	-45.41
0.07096	32.4	-32.4
0.071	36.1	-36.1
0.07104	41.3	-41.3
0.07108	20.61	-20.61
0.07112	39.02	-39.02
0.07116	34.63	-34.63
0.0712	31.36	-31.36
0.07124	46.56	-46.56
0.07128	41.59	-41.59
0.07132	42.4	-42.4
0.07136	40.73	-40.73
0.0714	24.92	-24.92
0.07144	40.26	-40.26
0.07148	52.69	-52.69
0.07152	50.21	-50.21
0.07156	32.69	-32.69
0.0716	33.59	-33.59
0.07164	42.17	-42.17
0.07168	36.1	-36.1
0.07172	35.81	-35.81
0.07176	28.41	-28.41
0.0718	46.1	-46.1
0.07184	31.31	-31.31
0.07188	40.12	-40.12
0.07192	43.44	-43.44
0.07196	35.18	-35.18
0.072	30.93	-30.93
0.07204	39.48	-39.48
0.07208	61.68	-61.68
0.07212	51.97	-51.97
0.07216	56.39	-56.39
0.0722	88.99	-88.99
0.07224	100.1	-100.1
0.07228	52.78	-52.78
0.07232	26.31	-26.31
0.07236	71.74	-71.74
0.0724	72.4	-72.4
0.07244	57.55	-57.55
0.07248	65.78	-65.78
0.07252	63.65	-63.65
0.07256	77.03	-77.03
0.0726	71.59	-71.59
0.07264	34.37	-34.37
0.07268	64.77	-64.77
0.07272	91.8	-91.8
0.07276	101.7	-101.7
0.0728	105.3	-105.3
0.07284	43.96	-43.96
0.07288	40.21	-40.21
0.07292	69.43	-69.43
0.07296	86.39	-86.39
0.073	64.22	-64.22
0.07304	75.49	-75.49
0.07308	90.61	-90.61
0.07312	77.14	-77.14
0.07316	55.12	-55.12
0.0732	43.04	-43.04
0.07324	67.66	-67.66
0.07328	82.14	-82.14
0.07332	89.14	-89.14
0.07336	66.71	-66.71
0.0734	58.67	-58.67
0.07344	36.62	-36.62
0.07348	61.91	-61.91
0.07352	67.03	-67.03
0.07356	80.21	-80.21
0.0736	51.33	-51.33
0.07364	60.99	-60.99
0.07368	57.84	-57.84
0.07372	77.72	-77.72
0.07376	74.4	-74.4
0.0738	72	-72
0.07384	89.14	-89.14
0.07388	35.67	-35.67
0.07392	52.89	-52.89
0.07396	65.93	-65.93
0.074	49.08	-49.08
0.07404	70.67	-70.67
0.07408	24.77	-24.77
0.07412	53.85	-53.85
0.07416	54.74	-54.74
0.0742	74.63	-74.63
0.07424	62.29	-62.29
0.07428	64.8	-64.8
0.07432	62.58	-62.58
0.07436	56.8	-56.8
0.0744	29.95	-29.95
0.07444	52.37	-52.37
0.07448	63.93	-63.93
0.07452	81.48	-81.48
0.07456	61.51	-61.51
0.0746	51.68	-51.68
0.07464	79.37	-79.37
0.07468	55.32	-55.32
0.07472	33.94	-33.94
0.07476	67.75	-67.75
0.0748	57.43	-57.43
0.07484	86.54	-86.54
0.07488	44.11	-44.11
0.07492	74.34	-74.34
0.07496	56.16	-56.16
0.075	74.8	-74.8
0.07504	36.1	-36.1
0.07508	36.71	-36.71
0.07512	80.84	-80.84
0.07516	41.13	-41.13
0.0752	69.17	-69.17
0.07524	38.13	-38.13
0.07528	34.37	-34.37
0.07532	82.37	-82.37
0.07536	56.13	-56.13
0.0754	33.33	-33.33
0.07544	20.96	-20.96
0.07548	47.92	-47.92
0.07552	51.82	-51.82
0.07556	58.85	-58.85
0.0756	61.88	-61.88
0.07564	67.86	-67.86
0.07568	63.73	-63.73
0.07572	38.3	-38.3
0.07576	41.83	-41.83
0.0758	30.99	-30.99
0.07584	15.81	-15.81
0.07588	49.02	-49.02
0.07592	45.24	-45.24
0.07596	62.06	-62.06
0.076	47.84	-47.84
0.07604	43.36	-43.36
0.07608	40.96	-40.96
0.07612	62.43	-62.43
0.07616	24.6	-24.6
0.0762	37.29	-37.29
0.07624	22.43	-22.43
0.07628	57.37	-57.37
0.07632	42.49	-42.49
0.07636	60.47	-60.47
0.0764	29.11	-29.11
0.07644	37.49	-37.49
0.07648	40.41	-40.41
0.07652	22.95	-22.95
0.07656	42.98	-42.98
0.0766	28.65	-28.65
0.07664	42.23	-42.23
0.07668	42.98	-42.98
0.07672	25.87	-25.87
0.07676	8.849	-8.849
0.0768	41.1	-41.1
0.07684	50.7	-50.7
0.07688	44.14	-44.14
0.07692	17.66	-17.66
0.07696	46.59	-46.59
0.077	19.8	-19.8
0.07704	19.83	-19.83
0.07708	47.95	-47.95
0.07712	6.045	-6.045
0.07716	17.49	-17.49
0.0772	48.33	-48.33
0.07724	49.89	-49.89
0.07728	9.282	-9.282
0.07732	44.08	-44.08
0.07736	15.55	-15.55
0.0774	30.67	-30.67
0.07744	34.11	-34.11
0.07748	21.57	-21.57
0.07752	25.18	-25.18
0.07756	22	-22
0.0776	43.3	-43.3
0.07764	18.21	-18.21
0.07768	9.311	-9.311
0.07772	33.15	-33.15
0.07776	22.81	-22.81
0.0778	33.62	-33.62
0.07784	55.06	-55.06
0.07788	12.09	-12.09
0.07792	24.22	-24.22
0.07796	28.65	-28.65
0.078	33.88	-33.88
0.07804	39.51	-39.51
0.07808	21.33	-21.33
0.07812	18.82	-18.82
0.07816	28.24	-28.24
0.0782	37.17	-37.17
0.07824	25.18	-25.18
0.07828	44.66	-44.66
0.07832	34.22	-34.22
0.07836	21.88	-21.88
0.0784	22.81	-22.81
0.07844	32.95	-32.95
0.07848	24.74	-24.74
0.07852	24.14	-24.14
0.07856	9.889	-9.889
0.0786	30.24	-30.24
0.07864	40.93	-40.93
0.07868	11.16	-11.16
0.07872	18.62	-18.62
0.07876	14.22	-14.22
0.0788	38.79	-38.79
0.07884	14.51	-14.51
0.07888	8.011	-8.011
0.07892	17.98	-17.98
0.07896	22.46	-22.46
0.079	23.56	-23.56
0.07904	26.33	-26.33
0.07908	30.76	-30.76
0.07912	21.57	-21.57
0.07916	29.8	-29.8
0.0792	33.94	-33.94
0.07924	49.43	-49.43
0.07928	18.47	-18.47
0.07932	18.47	-18.47
0.07936	42.55	-42.55
0.0794	28.36	-28.36
0.07944	23.99	-23.99
0.07948	17.75	-17.75
0.07952	24.17	-24.17
0.07956	28.76	-28.76
0.0796	20.99	-20.99
0.07964	19.92	-19.92
0.07968	11.19	-11.19
0.07972	39.31	-39.31
0.07976	30.9	-30.9
0.0798	18.3	-18.3
0.07984	26.36	-26.36
0.07988	31.8	-31.8
0.07992	22	-22
[truncated: 98,001 more rows]

## Sheet: Sheet1
		100	2500
time	data	butfilt1	Stress
0.472	99.7	996.441	0.398577
0.47204	52.97	1009.09	0.403634
0.47208	6.498	1021.6	0.408641
0.47212	204.2	1033.98	0.413591
0.47216	202.3	1046.2	0.418481
0.4722	1362	1058.26	0.423304
0.47224	3644	1070.14	0.428055
0.47228	5180	1081.82	0.432728
0.47232	7093	1093.3	0.43732
0.47236	8182	1104.56	0.441825
0.4724	9091	1115.6	0.44624
0.47244	9057	1126.41	0.450563
0.47248	7552	1136.98	0.454794
0.47252	7897	1147.33	0.458931
0.47256	7373	1157.44	0.462977
0.4726	5782	1167.33	0.466934
0.47264	5404	1177.01	0.470804
0.47268	4130	1186.48	0.474593
0.47272	2361	1195.76	0.478304
0.47276	1103	1204.86	0.481943
0.4728	335.6	1213.79	0.485515
0.47284	350	1222.56	0.489025
0.47288	228.8	1231.2	0.492479
0.47292	138.9	1239.7	0.495881
0.47296	506.8	1248.09	0.499237
0.473	505.4	1256.38	0.502551
0.47304	70.25	1264.57	0.505829
0.47308	126.8	1272.68	0.509074
0.47312	348.7	1280.73	0.512291
0.47316	153.9	1288.71	0.515484
0.4732	465.4	1296.64	0.518657
0.47324	941.4	1304.53	0.521814
0.47328	236.6	1312.4	0.524958
0.47332	-4.6	1320.24	0.528094
0.47336	311	1328.06	0.531225
0.4734	-486.3	1335.88	0.534354
0.47344	-740.6	1343.71	0.537483
0.47348	-78.18	1351.54	0.540616
0.47352	-96.25	1359.39	0.543756
0.47356	-182.3	1367.26	0.546904
0.4736	252.9	1375.16	0.550063
0.47364	199	1383.09	0.553234
0.47368	-41.91	1391.05	0.556419
0.47372	232.9	1399.05	0.55962
0.47376	136.3	1407.09	0.562836
0.4738	285.3	1415.18	0.566071
0.47384	712.1	1423.31	0.569323
0.47388	686.7	1431.49	0.572594
0.47392	563.4	1439.71	0.575885
0.47396	600.3	1447.99	0.579196
0.474	249.2	1456.31	0.582526
0.47404	119.4	1464.69	0.585876
0.47408	289.3	1473.12	0.589247
0.47412	216	1481.59	0.592636
0.47416	186.5	1490.11	0.596045
0.4742	581.6	1498.68	0.599472
0.47424	1093	1507.29	0.602917
0.47428	1382	1515.95	0.606378
0.47432	1890	1524.64	0.609855
0.47436	2443	1533.36	0.613345
0.4744	2423	1542.12	0.616849
0.47444	2450	1550.91	0.620365
0.47448	2443	1559.73	0.623892
0.47452	2013	1568.58	0.62743
0.47456	1658	1577.45	0.630979
0.4746	989.3	1586.34	0.634536
0.47464	585.4	1595.26	0.638104
0.47468	531.9	1604.2	0.641679
0.47472	221.9	1613.16	0.645263
0.47476	356.8	1622.13	0.648854
0.4748	1247	1631.13	0.652451
0.47484	1562	1640.13	0.656052
0.47488	1836	1649.14	0.659657
0.47492	2365	1658.16	0.663264
0.47496	2739	1667.18	0.666871
0.475	3996	1676.2	0.670479
0.47504	5558	1685.21	0.674085
0.47508	5804	1694.22	0.677689
0.47512	6112	1703.23	0.681291
0.47516	6600	1712.23	0.684891
0.4752	6078	1721.23	0.688492
0.47524	5751	1730.24	0.692094
0.47528	4972	1739.25	0.695702
0.47532	4010	1748.29	0.699317
0.47536	3471	1757.36	0.702944
0.4754	2357	1766.47	0.706588
0.47544	1350	1775.63	0.710252
0.47548	277.5	1784.85	0.713942
0.47552	-751.2	1794.15	0.717661
0.47556	-1010	1803.54	0.721414
0.4756	-992.1	1813.01	0.725206
0.47564	-920.6	1822.6	0.729038
0.47568	-154.7	1832.29	0.732916
0.47572	451.5	1842.1	0.73684
0.47576	721.7	1852.03	0.740814
0.4758	1085	1862.1	0.744839
0.47584	1146	1872.3	0.748918
0.47588	1073	1882.63	0.753053
0.47592	1122	1893.11	0.757244
0.47596	1381	1903.73	0.761493
0.476	892.8	1914.51	0.765803
0.47604	423.8	1925.43	0.770174
0.47608	355.3	1936.52	0.774606
0.47612	-401.8	1947.76	0.779103
0.47616	-908.9	1959.16	0.783662
0.4762	-535.7	1970.72	0.788286
0.47624	2.336	1982.43	0.792974
0.47628	683.9	1994.31	0.797725
0.47632	1456	2006.35	0.802538
0.47636	2257	2018.53	0.807413
0.4764	2778	2030.87	0.812349
0.47644	2803	2043.36	0.817343
0.47648	3024	2055.99	0.822396
0.47652	3170	2068.76	0.827506
0.47656	3325	2081.68	0.832672
0.4766	3810	2094.74	0.837895
0.47664	3850	2107.93	0.843173
0.47668	3468	2121.27	0.848506
0.47672	3347	2134.74	0.853896
0.47676	2845	2148.35	0.859341
0.4768	2445	2162.11	0.864843
0.47684	2514	2176.01	0.870402
0.47688	2284	2190.05	0.876019
0.47692	2570	2204.24	0.881695
0.47696	2987	2218.58	0.887431
0.477	2839	2233.07	0.893227
0.47704	2965	2247.71	0.899084
0.47708	2978	2262.51	0.905004
0.47712	2904	2277.47	0.910988
0.47716	3179	2292.59	0.917036
0.4772	3055	2307.88	0.923152
0.47724	3128	2323.34	0.929335
0.47728	3181	2338.97	0.935588
0.47732	2963	2354.78	0.941912
0.47736	2885	2370.78	0.94831
0.4774	2497	2386.96	0.954783
0.47744	2237	2403.34	0.961334
0.47748	2015	2419.91	0.967965
0.47752	1458	2436.69	0.974677
0.47756	1068	2453.68	0.981473
0.4776	804.4	2470.89	0.988354
0.47764	424.3	2488.31	0.995323
0.47768	309	2505.95	1.00238
0.47772	263.9	2523.82	1.00953
0.47776	301.5	2541.91	1.01676
0.4778	510	2560.23	1.02409
0.47784	652.6	2578.78	1.03151
0.47788	845.9	2597.55	1.03902
0.47792	1263	2616.55	1.04662
0.47796	1716	2635.77	1.05431
0.478	2249	2655.2	1.06208
0.47804	2933	2674.86	1.06994
0.47808	3456	2694.73	1.07789
0.47812	3924	2714.81	1.08592
0.47816	4337	2735.09	1.09404
0.4782	4522	2755.58	1.10223
0.47824	4581	2776.27	1.11051
0.47828	4504	2797.17	1.11887
0.47832	4366	2818.26	1.12731
0.47836	4167	2839.56	1.13583
0.4784	3918	2861.06	1.14443
0.47844	3690	2882.77	1.15311
0.47848	3449	2904.68	1.16187
0.47852	3139	2926.8	1.17072
0.47856	2849	2949.12	1.17965
0.4786	2528	2971.66	1.18867
0.47864	2241	2994.42	1.19777
0.47868	1950	3017.39	1.20696
0.47872	1834	3040.58	1.21623
0.47876	1834	3063.99	1.2256
0.4788	1884	3087.63	1.23505
0.47884	2243	3111.48	1.24459
0.47888	2581	3135.56	1.25422
0.47892	2744	3159.86	1.26394
0.47896	3131	3184.38	1.27375
0.479	3427	3209.12	1.28365
0.47904	3467	3234.08	1.29363
0.47908	3534	3259.26	1.30371
0.47912	3552	3284.67	1.31387
0.47916	3541	3310.29	1.32411
0.4792	3449	3336.12	1.33445
0.47924	3282	3362.18	1.34487
0.47928	3155	3388.45	1.35538
0.47932	2929	3414.95	1.36598
0.47936	2696	3441.66	1.37666
0.4794	2620	3468.58	1.38743
0.47944	2561	3495.73	1.39829
0.47948	2554	3523.09	1.40923
0.47952	2556	3550.66	1.42026
0.47956	2611	3578.44	1.43138
0.4796	2609	3606.44	1.44257
0.47964	2596	3634.64	1.45385
0.47968	2801	3663.04	1.46522
0.47972	3024	3691.64	1.47666
0.47976	3257	3720.44	1.48818
0.4798	3562	3749.44	1.49978
0.47984	3871	3778.62	1.51145
0.47988	4091	3807.99	1.52319
0.47992	4151	3837.53	1.53501
0.47996	4246	3867.25	1.5469
0.48	4292	3897.15	1.55886
0.48004	4260	3927.21	1.57088
0.48008	4178	3957.43	1.58297
0.48012	3967	3987.82	1.59513
0.48016	3734	4018.36	1.60734
0.4802	3463	4049.05	1.61962
0.48024	3271	4079.9	1.63196
0.48028	3093	4110.89	1.64436
0.48032	3031	4142.02	1.65681
0.48036	3096	4173.29	1.66932
0.4804	3150	4204.69	1.68188
0.48044	3164	4236.21	1.69449
0.48048	3277	4267.86	1.70714
0.48052	3401	4299.62	1.71985
0.48056	3549	4331.49	1.73259
0.4806	3763	4363.45	1.74538
0.48064	3978	4395.51	1.75821
0.48068	4178	4427.66	1.77106
0.48072	4445	4459.88	1.78395
0.48076	4700	4492.17	1.79687
0.4808	4882	4524.53	1.80981
0.48084	5062	4556.93	1.82277
0.48088	5247	4589.39	1.83575
0.48092	5350	4621.88	1.84875
0.48096	5393	4654.4	1.86176
0.481	5350	4686.95	1.87478
0.48104	5171	4719.52	1.88781
0.48108	4939	4752.09	1.90084
0.48112	4675	4784.68	1.91387
0.48116	4398	4817.26	1.9269
0.4812	4176	4849.83	1.93993
0.48124	4053	4882.4	1.95296
0.48128	3971	4914.94	1.96597
0.48132	4009	4947.45	1.97898
0.48136	4174	4979.93	1.99197
0.4814	4286	5012.37	2.00495
0.48144	4425	5044.76	2.0179
0.48148	4605	5077.09	2.03083
0.48152	4762	5109.35	2.04374
0.48156	4930	5141.53	2.05661
0.4816	5114	5173.64	2.06945
0.48164	5252	5205.65	2.08226
0.48168	5305	5237.55	2.09502
0.48172	5410	5269.35	2.10774
0.48176	5520	5301.02	2.12041
0.4818	5594	5332.57	2.13303
0.48184	5616	5363.98	2.14559
0.48188	5558	5395.24	2.1581
0.48192	5457	5426.35	2.17054
0.48196	5383	5457.29	2.18292
0.482	5290	5488.06	2.19523
0.48204	5129	5518.65	2.20746
0.48208	5017	5549.06	2.21962
0.48212	4916	5579.26	2.2317
0.48216	4876	5609.26	2.2437
0.4822	4764	5639.04	2.25561
0.48224	4778	5668.59	2.26744
0.48228	4853	5697.91	2.27916
0.48232	4978	5726.98	2.29079
0.48236	5101	5755.79	2.30232
0.4824	5216	5784.34	2.31374
0.48244	5433	5812.61	2.32504
0.48248	5691	5840.59	2.33624
0.48252	5805	5868.27	2.34731
0.48256	5897	5895.63	2.35825
0.4826	5862	5922.67	2.36907
0.48264	5855	5949.37	2.37975
0.48268	5912	5975.73	2.39029
0.48272	5948	6001.73	2.40069
0.48276	5933	6027.35	2.41094
0.4828	5908	6052.59	2.42104
0.48284	5929	6077.44	2.43098
0.48288	6007	6101.88	2.44075
0.48292	6088	6125.9	2.45036
0.48296	6155	6149.49	2.4598
0.483	6180	6172.64	2.46906
0.48304	6214	6195.34	2.47814
0.48308	6253	6217.57	2.48703
0.48312	6255	6239.32	2.49573
0.48316	6307	6260.58	2.50423
0.4832	6330	6281.34	2.51254
0.48324	6406	6301.59	2.52064
0.48328	6551	6321.31	2.52852
0.48332	6734	6340.49	2.5362
0.48336	6909	6359.13	2.54365
0.4834	6999	6377.2	2.55088
0.48344	7158	6394.71	2.55788
0.48348	7228	6411.63	2.56465
0.48352	7305	6427.95	2.57118
0.48356	7274	6443.68	2.57747
0.4836	7268	6458.78	2.58351
0.48364	7202	6473.27	2.58931
0.48368	7146	6487.12	2.59485
0.48372	7062	6500.33	2.60013
0.48376	6953	6512.88	2.60515
0.4838	6851	6524.78	2.60991
0.48384	6767	6536.01	2.6144
0.48388	6708	6546.56	2.61862
0.48392	6653	6556.42	2.62257
0.48396	6620	6565.59	2.62624
0.484	6601	6574.06	2.62962
0.48404	6614	6581.82	2.63273
0.48408	6648	6588.86	2.63554
0.48412	6727	6595.17	2.63807
0.48416	6851	6600.75	2.6403
0.4842	6941	6605.59	2.64224
0.48424	7102	6609.68	2.64387
0.48428	7318	6613.01	2.6452
0.48432	7503	6615.57	2.64623
0.48436	7693	6617.36	2.64694
0.4844	7913	6618.37	2.64735
0.48444	8086	6618.59	2.64744
0.48448	8184	6618.02	2.64721
0.48452	8228	6616.65	2.64666
0.48456	8142	6614.48	2.64579
0.4846	8018	6611.5	2.6446
0.48464	7853	6607.71	2.64309
0.48468	7634	6603.11	2.64124
0.48472	7468	6597.69	2.63908
0.48476	7348	6591.46	2.63658
0.4848	7218	6584.4	2.63376
0.48484	7178	6576.52	2.63061
0.48488	7200	6567.82	2.62713
0.48492	7243	6558.29	2.62332
0.48496	7336	6547.94	2.61918
0.485	7407	6536.76	2.6147
0.48504	7559	6524.76	2.6099
0.48508	7732	6511.93	2.60477
0.48512	7853	6498.28	2.59931
0.48516	8036	6483.81	2.59352
0.4852	8140	6468.51	2.58741
0.48524	8221	6452.4	2.58096
0.48528	8232	6435.47	2.57419
0.48532	8228	6417.72	2.56709
0.48536	8123	6399.17	2.55967
0.4854	7997	6379.82	2.55193
0.48544	7776	6359.66	2.54387
0.48548	7484	6338.72	2.53549
0.48552	7206	6316.99	2.5268
0.48556	6917	6294.49	2.51779
0.4856	6613	6271.21	2.50848
0.48564	6325	6247.18	2.49887
0.48568	6134	6222.39	2.48896
0.48572	6019	6196.86	2.47874
0.48576	6027	6170.59	2.46824
0.4858	6131	6143.59	2.45744
0.48584	6278	6115.87	2.44635
0.48588	6504	6087.44	2.43498
0.48592	6795	6058.31	2.42332
0.48596	7100	6028.48	2.41139
0.486	7356	5997.96	2.39918
0.48604	7556	5966.76	2.38671
0.48608	7708	5934.9	2.37396
0.48612	7726	5902.38	2.36095
0.48616	7697	5869.21	2.34768
0.4862	7609	5835.4	2.33416
0.48624	7495	5800.97	2.32039
0.48628	7302	5765.93	2.30637
0.48632	7074	5730.3	2.29212
0.48636	6776	5694.08	2.27763
0.4864	6468	5657.29	2.26292
0.48644	6134	5619.95	2.24798
0.48648	5844	5582.07	2.23283
0.48652	5560	5543.68	2.21747
0.48656	5321	5504.77	2.20191
0.4866	5167	5465.38	2.18615
0.48664	5080	5425.51	2.17021
0.48668	5018	5385.19	2.15408
0.48672	5042	5344.42	2.13777
0.48676	5133	5303.23	2.12129
0.4868	5316	5261.63	2.10465
0.48684	5490	5219.63	2.08785
0.48688	5617	5177.25	2.0709
0.48692	5772	5134.5	2.0538
0.48696	5868	5091.4	2.03656
0.487	5869	5047.97	2.01919
0.48704	5814	5004.23	2.00169
0.48708	5668	4960.18	1.98407
0.48712	5418	4915.84	1.96634
0.48716	5178	4871.24	1.9485
0.4872	4892	4826.39	1.93056
0.48724	4589	4781.31	1.91252
0.48728	4296	4736.01	1.8944
0.48732	4088	4690.51	1.87621
0.48736	3888	4644.84	1.85793
0.4874	3754	4598.99	1.8396
0.48744	3653	4553	1.8212
0.48748	3593	4506.88	1.80275
0.48752	3600	4460.65	1.78426
0.48756	3636	4414.31	1.76572
0.4876	3678	4367.89	1.74716
0.48764	3764	4321.4	1.72856
0.48768	3836	4274.85	1.70994
0.48772	3910	4228.27	1.69131
0.48776	4023	4181.66	1.67266
0.4878	4058	4135.03	1.65401
0.48784	4115	4088.41	1.63536
0.48788	4131	4041.81	1.61672
0.48792	4119	3995.23	1.59809
0.48796	4027	3948.7	1.57948
0.488	3891	3902.23	1.56089
0.48804	3689	3855.83	1.54233
0.48808	3451	3809.51	1.5238
0.48812	3208	3763.3	1.50532
0.48816	2962	3717.2	1.48688
0.4882	2759	3671.23	1.46849
0.48824	2597	3625.4	1.45016
0.48828	2492	3579.72	1.43189
0.48832	2426	3534.21	1.41369
0.48836	2393	3488.88	1.39555
0.4884	2375	3443.75	1.3775
0.48844	2338	3398.81	1.35952
0.48848	2387	3354.09	1.34164
0.48852	2396	3309.59	1.32384
0.48856	2462	3265.32	1.30613
0.4886	2508	3221.3	1.28852
0.48864	2515	3177.54	1.27101
0.48868	2518	3134.03	1.25361
0.48872	2499	3090.79	1.23632
0.48876	2466	3047.84	1.21914
0.4888	2437	3005.17	1.20207
0.48884	2396	2962.8	1.18512
0.48888	2304	2920.73	1.16829
0.48892	2212	2878.98	1.15159
0.48896	2053	2837.54	1.13502
0.489	1863	2796.43	1.11857
0.48904	1647	2755.65	1.10226
0.48908	1462	2715.21	1.08609
0.48912	1297	2675.12	1.07005
0.48916	1148	2635.38	1.05415
0.4892	1023	2595.99	1.0384
0.48924	994	2556.97	1.02279
0.48928	1004	2518.31	1.00732
0.48932	1070	2480.01	0.992005
0.48936	1265	2442.09	0.976836
0.4894	1458	2404.54	0.961815
0.48944	1707	2367.36	0.946943
0.48948	1930	2330.55	0.932222
0.48952	2101	2294.13	0.91765
0.48956	2243	2258.07	0.90323
0.4896	2319	2222.4	0.888959
0.48964	2364	2187.1	0.87484
0.48968	2348	2152.18	0.860873
0.48972	2303	2117.64	0.847056
0.48976	2243	2083.48	0.833392
0.4898	2212	2049.7	0.81988
0.48984	2155	2016.3	0.806521
0.48988	2065	1983.29	0.793315
0.48992	1969	1950.66	0.780262
0.48996	1863	1918.41	0.767363
0.49	1744	1886.55	0.754619
0.49004	1620	1855.07	0.742029
0.49008	1485	1823.99	0.729595
0.49012	1343	1793.29	0.717316
0.49016	1232	1762.98	0.705192
0.4902	1153	1733.06	0.693225
0.49024	1107	1703.54	0.681415
0.49028	1128	1674.4	0.66976
0.49032	1179	1645.66	0.658262
0.49036	1279	1617.3	0.64692
0.4904	1358	1589.34	0.635735
0.49044	1434	1561.76	0.624704
0.49048	1459	1534.57	0.61383
0.49052	1504	1507.78	0.603111
0.49056	1509	1481.37	0.592546
0.4906	1545	1455.34	0.582136
0.49064	1570	1429.7	0.571881
0.49068	1494	1404.45	0.56178
0.49072	1431	1379.58	0.551832
0.49076	1234	1355.09	0.542038
0.4908	994.5	1330.99	0.532397
0.49084	818.2	1307.27	0.522909
0.49088	637.2	1283.93	0.513574
0.49092	558.6	1260.98	0.504391
0.49096	501.5	1238.4	0.495359
0.491	425.8	1216.2	0.486479
0.49104	368.7	1194.37	0.477749
0.49108	267.6	1172.92	0.469169
0.49112	176.1	1151.84	0.460737
0.49116	150.1	1131.13	0.452452
0.4912	161.1	1110.78	0.444314
0.49124	215.8	1090.8	0.43632
0.49128	410.3	1071.17	0.428469
0.49132	607.7	1051.9	0.420759
0.49136	839.2	1032.97	0.413189
0.4914	1124	1014.39	0.405757
0.49144	1391	996.15	0.39846
0.49148	1562	978.243	0.391297
0.49152	1703	960.665	0.384266
0.49156	1726	943.413	0.377365
0.4916	1655	926.482	0.370593
0.49164	1559	909.869	0.363947
0.49168	1426	893.569	0.357428
0.49172	1314	877.58	0.351032
0.49176	1186	861.899	0.34476
0.4918	1047	846.522	0.338609
0.49184	906.8	831.447	0.332579
0.49188	766.7	816.672	0.326669
0.49192	620.4	802.193	0.320877
0.49196	486.4	788.007	0.315203
0.492	424.5	774.113	0.309645
0.49204	362.5	760.507	0.304203
0.49208	378.7	747.186	0.298874
0.49212	453.3	734.147	0.293659
0.49216	472.1	721.387	0.288555
0.4922	557.8	708.902	0.283561
0.49224	619.8	696.689	0.278676
0.49228	670.6	684.744	0.273898
0.49232	700.9	673.064	0.269226
0.49236	728	661.646	0.264658
0.4924	751.1	650.484	0.260194
0.49244	758.7	639.577	0.255831
0.49248	698.2	628.92	0.251568
0.49252	653.2	618.51	0.247404
0.49256	581.3	608.343	0.243337
0.4926	424.1	598.417	0.239367
0.49264	299.4	588.727	0.235491
0.49268	175.3	579.269	0.231708
0.49272	40.72	570.042	0.228017
0.49276	-40.18	561.039	0.224416
0.4928	-40.5	552.259	0.220903
0.49284	-37.17	543.695	0.217478
0.49288	45.63	535.344	0.214138
0.49292	158.4	527.201	0.21088
0.49296	282.8	519.261	0.207705
0.493	376.5	511.52	0.204608
0.49304	469.9	503.971	0.201588
0.49308	515.9	496.61	0.198644
0.49312	571.4	489.432	0.195773
0.49316	636.5	482.431	0.192972
0.4932	738	475.602	0.190241
0.49324	825	468.94	0.187576
0.49328	965	462.44	0.184976
0.49332	1105	456.098	0.182439
0.49336	1311	449.908	0.179963
0.4934	1392	443.867	0.177547
0.49344	1422	437.969	0.175188
0.49348	1388	432.212	0.172885
0.49352	1326	426.592	0.170637
0.49356	1242	421.107	0.168443
0.4936	1123	415.753	0.166301
0.49364	960.5	410.529	0.164211
0.49368	767.5	405.431	0.162173
0.49372	558.9	400.46	0.160184
0.49376	372	395.613	0.158245
0.4938	261.1	390.888	0.156355
0.49384	121.4	386.284	0.154514
0.49388	91.15	381.799	0.15272
0.49392	78.92	377.432	0.150973
0.49396	125.9	373.181	0.149272
0.494	183.6	369.043	0.147617
0.49404	235.7	365.018	0.146007
0.49408	295.8	361.102	0.144441
0.49412	272.1	357.294	0.142918
0.49416	234.1	353.591	0.141437
0.4942	199	349.992	0.139997
0.49424	230.5	346.494	0.138597
0.49428	269.5	343.094	0.137238
0.49432	287.2	339.79	0.135916
0.49436	332.5	336.581	0.134632
0.4944	371.3	333.463	0.133385
0.49444	374.4	330.434	0.132174
0.49448	332.5	327.492	0.130997
0.49452	336.8	324.634	0.129854
0.49456	352.5	321.858	0.128743
0.4946	253	319.162	0.127665
0.49464	222.9	316.543	0.126617
0.49468	173.9	313.998	0.125599
0.49472	125.9	311.526	0.124611
0.49476	131.3	309.124	0.12365
0.4948	149.4	306.789	0.122716
0.49484	196.5	304.519	0.121808
0.49488	270.7	302.311	0.120924
0.49492	339.5	300.162	0.120065
0.49496	409.6	298.07	0.119228
0.495	473.3	296.031	0.118412
0.49504	532.1	294.043	0.117617
0.49508	602.6	292.105	0.116842
0.49512	669.7	290.212	0.116085
0.49516	691.7	288.362	0.115345
0.4952	750.8	286.555	0.114622
0.49524	761.9	284.786	0.113914
0.49528	785.1	283.055	0.113222
0.49532	751.5	281.36	0.112544
0.49536	689.5	279.698	0.111879
0.4954	633.1	278.07	0.111228
0.49544	586.7	276.474	0.110589
0.49548	504.4	274.908	0.109963
0.49552	424.2	273.372	0.109349
0.49556	342.8	271.864	0.108746
0.4956	245.3	270.385	0.108154
0.49564	189.9	268.934	0.107574
0.49568	158.5	267.509	0.107004
0.49572	107.7	266.11	0.106444
0.49576	108.9	264.737	0.105895
0.4958	166	263.387	0.105355
0.49584	249.6	262.061	0.104824
0.49588	323.7	260.758	0.104303
0.49592	440.1	259.475	0.10379
0.49596	506.3	258.214	0.103286
0.496	553.8	256.972	0.102789
0.49604	578.5	255.749	0.1023
0.49608	558.7	254.545	0.101818
0.49612	565.3	253.358	0.101343
0.49616	479.4	252.189	0.100875
0.4962	382	251.036	0.100415
0.49624	267.1	249.901	0.0999603
0.49628	235.8	248.782	0.0995128
0.49632	159.8	247.68	0.099072
0.49636	134.8	246.594	0.0986377
0.4964	148.1	245.525	0.0982099
0.49644	159.3	244.471	0.0977885
0.49648	205.5	243.434	0.0973734
0.49652	251.7	242.411	0.0969646
0.49656	233.5	241.405	0.0965618
0.4966	268.5	240.413	0.0961651
0.49664	247.7	239.435	0.0957741
0.49668	178.6	238.472	0.0953889
0.49672	152.7	237.523	0.0950093
0.49676	139.9	236.588	0.0946352
0.4968	135.8	235.666	0.0942665
0.49684	138.3	234.757	0.0939029
0.49688	227.8	233.861	0.0935444
0.49692	264	232.977	0.0931908
0.49696	329.3	232.104	0.0928418
0.497	366.3	231.243	0.0924972
0.49704	334.2	230.393	0.0921571
0.49708	324.8	229.553	0.0918211
0.49712	218.8	228.723	0.0914892
0.49716	132.1	227.903	0.0911612
0.4972	38.4	227.092	0.090837
0.49724	-39.31	226.291	0.0905165
0.49728	-84.66	225.499	0.0901995
0.49732	-98.93	224.715	0.0898859
0.49736	-41.56	223.938	0.0895753
0.4974	39.44	223.169	0.0892674
0.49744	102.2	222.405	0.088962
0.49748	169.3	221.647	0.0886587
0.49752	209.2	220.893	0.088357
0.49756	262.4	220.142	0.0880566
0.4976	229.5	219.393	0.0877571
0.49764	227	218.645	0.087458
0.49768	128.1	217.898	0.087159
0.49772	106	217.149	0.0868597
0.49776	88	216.399	0.0865597
0.4978	78.14	215.646	0.0862585
0.49784	128.1	214.889	0.0859557
0.49788	209.7	214.127	0.0856508
0.49792	317.1	213.359	0.0853434
0.49796	383.3	212.582	0.085033
0.498	471.7	211.798	0.0847191
0.49804	500	211.003	0.0844012
0.49808	514	210.198	0.0840791
0.49812	515.2	209.381	0.0837523
0.49816	505.5	208.551	0.0834205
0.4982	463.2	207.709	0.0830836
0.49824	452.7	206.853	0.0827412
0.49828	444.3	205.983	0.0823932
0.49832	426.9	205.099	0.0820395
0.49836	444.2	204.2	0.08168
0.4984	434.9	203.287	0.0813146
0.49844	425	202.358	0.0809434
0.49848	404.2	201.416	0.0805663
0.49852	378.8	200.458	0.0801834
0.49856	339.2	199.487	0.0797948
0.4986	312.2	198.501	0.0794006
0.49864	276.3	197.502	0.0790009
0.49868	253.1	196.49	0.0785959
0.49872	238.7	195.465	0.0781859
0.49876	230.3	194.427	0.0777708
0.4988	248	193.378	0.077351
0.49884	293.5	192.317	0.0769267
0.49888	326.8	191.245	0.0764979
0.49892	344.7	190.163	0.0760651
0.49896	353.2	189.071	0.0756283
0.499	337.1	187.97	0.0751879
0.49904	334.4	186.86	0.0747442
0.49908	306.7	185.743	0.0742974
0.49912	243.4	184.62	0.0738479
0.49916	200.5	183.49	0.0733961
0.4992	165	182.356	0.0729423
0.49924	109.5	181.217	0.0724869
0.49928	78.58	180.076	0.0720303
0.49932	27.48	178.932	0.0715727
0.49936	11.3	177.786	0.0711146
0.4994	12.88	176.641	0.0706562
0.49944	10.2	175.495	0.0701979
0.49948	52.16	174.35	0.0697399
0.49952	71.55	173.206	0.0692824
0.49956	88.26	172.064	0.0688257
0.4996	101.1	170.925	0.0683699
0.49964	80.22	169.788	0.0679153
0.49968	50.86	168.655	0.067462
0.49972	41.58	167.526	0.0670102
0.49976	32.08	166.4	0.06656
0.4998	24.62	165.279	0.0661116
0.49984	26.24	164.162	0.065665
0.49988	53.72	163.051	0.0652203
0.49992	82.88	161.944	0.0647776
0.49996	80.2	160.842	0.0643369
0.5	106.9	159.746	0.0638983
0.50004	101.9	158.654	0.0634617
0.50008	90.92	157.568	0.0630272
0.50012	78.9	156.487	0.0625948
0.50016	88.03	155.411	0.0621644
0.5002	98.14	154.34	0.0617361
0.50024	90.34	153.274	0.0613097
0.50028	101.1	152.213	0.0608853
0.50032	90.05	151.157	0.0604627
0.50036	117.2	150.105	0.060042
0.5004	128.3	149.057	0.059623
0.50044	136	148.014	0.0592056
0.50048	189.8	146.975	0.0587899
0.50052	232.5	145.939	0.0583756
0.50056	245.6	144.907	0.0579628
0.5006	232.6	143.878	0.0575514
0.50064	218.1	142.853	0.0571412
0.50068	190.9	141.831	0.0567323
0.50072	177	140.812	0.0563247
0.50076	190.1	139.796	0.0559183
0.5008	178.9	138.783	0.0555132
0.50084	214.5	137.773	0.0551092
0.50088	250.9	136.766	0.0547066
0.50092	301.1	135.763	0.0543051
0.50096	326.8	134.762	0.053905
0.501	315.4	133.765	0.0535062
0.50104	314.4	132.772	0.0531089
0.50108	299.1	131.783	0.0527131
0.50112	283.7	130.798	0.0523191
0.50116	253.6	129.817	0.051927
0.5012	233.5	128.842	0.051537
0.50124	165.6	127.873	0.0511493
0.50128	143.4	126.91	0.0507641
0.50132	87.65	125.954	0.0503818
0.50136	54.59	125.006	0.0500025
0.5014	38.87	124.066	0.0496265
0.50144	46.38	123.135	0.049254
0.50148	30.72	122.213	0.0488852
0.50152	18.2	121.301	0.0485203
0.50156	21.96	120.399	0.0481596
0.5016	17.83	119.508	0.0478032
0.50164	-4.369	118.628	0.0474512
0.50168	27.94	117.759	0.0471038
0.50172	20.75	116.903	0.0467611
0.50176	53.9	116.058	0.0464232
0.5018	85.77	115.226	0.0460902
0.50184	72.28	114.406	0.0457623
0.50188	46.06	113.598	0.0454394
0.50192	26.5	112.804	0.0451216
0.50196	11.79	112.023	0.0448091
0.502	3.261	111.254	0.0445018
0.50204	9.561	110.499	0.0441998
0.50208	19.94	109.758	0.043903
0.50212	49.94	109.029	0.0436116
0.50216	39.88	108.313	0.0433254
0.5022	32.39	107.611	0.0430445
0.50224	62.94	106.922	0.0427687
0.50228	85.02	106.245	0.0424981
0.50232	101	105.582	0.0422327
0.50236	75.25	104.931	0.0419722
0.5024	87.83	104.292	0.0417168
0.50244	106.1	103.666	0.0414662
0.50248	95.72	103.051	0.0412205
0.50252	76.84	102.449	0.0409796
0.50256	15.77	101.858	0.0407434
0.5026	42.25	101.279	0.0405118
0.50264	64.7	100.712	0.0402847
0.50268	108.5	100.155	0.0400621
0.50272	101.3	99.6096	0.0398438
0.50276	119.2	99.0746	0.0396298
0.5028	161.4	98.5499	0.03942
0.50284	144.7	98.0354	0.0392142
0.50288	108.4	97.5308	0.0390123
0.50292	29.39	97.0359	0.0388144
0.50296	79.3	96.5505	0.0386202
0.503	67.74	96.0743	0.0384297
0.50304	62.68	95.6072	0.0382429
0.50308	31.09	95.1489	0.0380596
0.50312	38.32	94.6992	0.0378797
0.50316	3.001	94.2577	0.0377031
0.5032	-9.571	93.8242	0.0375297
0.50324	-21.33	93.3982	0.0373593
0.50328	43.75	92.9795	0.0371918
0.50332	85.57	92.5677	0.0370271
0.50336	105.2	92.1622	0.0368649
0.5034	87.57	91.7626	0.0367051
0.50344	113.9	91.3686	0.0365474
0.50348	63.64	90.9796	0.0363918
0.50352	49.79	90.5952	0.0362381
0.50356	39.24	90.2149	0.036086
0.5036	10.25	89.8383	0.0359353
0.50364	12.68	89.465	0.035786
0.50368	26.7	89.0943	0.0356377
0.50372	33.46	88.7258	0.0354903
0.50376	40.54	88.3588	0.0353435
0.5038	-4.109	87.9928	0.0351971
0.50384	33.17	87.6272	0.0350509
0.50388	46.01	87.2613	0.0349045
0.50392	76.93	86.8945	0.0347578
0.50396	137.7	86.526	0.0346104
0.504	183.6	86.1552	0.0344621
0.50404	250.3	85.7815	0.0343126
0.50408	290.5	85.4042	0.0341617
0.50412	311.5	85.0227	0.0340091
0.50416	347.6	84.6366	0.0338546
0.5042	357.7	84.2455	0.0336982
0.50424	389	83.8491	0.0335396
0.50428	377.8	83.4473	0.0333789
0.50432	371.8	83.0399	0.0332159
0.50436	364.4	82.627	0.0330508
0.5044	348.7	82.2088	0.0328835
0.50444	330.9	81.7857	0.0327143
0.50448	319.4	81.3579	0.0325431
0.50452	262.6	80.9259	0.0323704
0.50456	189.4	80.4905	0.0321962
0.5046	109.3	80.0521	0.0320208
0.50464	62.19	79.6114	0.0318446
0.50468	-10.09	79.1693	0.0316677
0.50472	-68.88	78.7264	0.0314906
0.50476	-82.58	78.2833	0.0313133
0.5048	-56.59	77.8406	0.0311363
0.50484	-19.25	77.399	0.0309596
0.50488	21.99	76.9589	0.0307835
0.50492	64.62	76.5207	0.0306083
0.50496	92.25	76.085	0.030434
0.505	110.7	75.6522	0.0302609
0.50504	125.3	75.2226	0.030089
0.50508	103.4	74.7968	0.0299187
0.50512	73.03	74.3752	0.0297501
0.50516	30.89	73.9583	0.0295833
0.5052	5.515	73.5466	0.0294187
0.50524	-46.62	73.1406	0.0292562
0.50528	-57.84	72.7406	0.0290962
0.50532	-40.67	72.347	0.0289388
0.50536	-35.5	71.9603	0.0287841
0.5054	5.631	71.5806	0.0286322
0.50544	11.01	71.2083	0.0284833
0.50548	41.01	70.8436	0.0283374
0.50552	49.7	70.4866	0.0281946
0.50556	87.42	70.1376	0.028055
0.5056	92.36	69.7967	0.0279187
0.50564	73.03	69.4642	0.0277857
0.50568	59.56	69.1402	0.0276561
0.50572	48.17	68.825	0.02753
0.50576	16.35	68.5187	0.0274075
0.5058	0.6019	68.2214	0.0272886
0.50584	9.041	67.9335	0.0271734
0.50588	-9.831	67.6549	0.027062
0.50592	30.98	67.3858	0.0269543
0.50596	21.67	67.1264	0.0268506
0.506	29.47	66.8766	0.0267506
0.50604	14.27	66.6365	0.0266546
0.50608	-5.814	66.4062	0.0265625
0.50612	-10.26	66.1856	0.0264742
0.50616	5.688	65.9747	0.0263899
0.5062	41.84	65.7736	0.0263094
0.50624	49.56	65.5821	0.0262329
0.50628	52.16	65.4002	0.0261601
0.50632	54.21	65.2278	0.0260911
0.50636	58.09	65.0647	0.0260259
0.5064	26.15	64.9109	0.0259644
0.50644	-7.548	64.7663	0.0259065
0.50648	1.556	64.6308	0.0258523
0.50652	-28.7	64.5043	0.0258017
0.50656	-23.94	64.3864	0.0257546
0.5066	-11.25	64.2772	0.0257109
0.50664	-23.1	64.1762	0.0256705
0.50668	17.97	64.0833	0.0256333
0.50672	29.36	63.9982	0.0255993
0.50676	39.33	63.9204	0.0255682
0.5068	38.46	63.8498	0.0255399
0.50684	65.05	63.7859	0.0255144
0.50688	63.78	63.7284	0.0254914
0.50692	31.21	63.677	0.0254708
0.50696	11.18	63.6312	0.0254525
0.507	17.6	63.5907	0.0254363
0.50704	-20.76	63.5552	0.0254221
0.50708	-13.33	63.5241	0.0254096
0.50712	-15.26	63.4971	0.0253988
0.50716	-17.32	63.4737	0.0253895
0.5072	-8.386	63.4534	0.0253813
0.50724	12.36	63.4356	0.0253742
0.50728	51.87	63.4198	0.0253679
0.50732	97.65	63.4054	0.0253621
0.50736	86.84	63.3918	0.0253567
0.5074	143.9	63.3785	0.0253514
0.50744	194.2	63.3648	0.0253459
0.50748	273.5	63.3504	0.0253401
0.50752	309.2	63.3346	0.0253338
0.50756	315.1	63.3171	0.0253269
0.5076	294.6	63.2977	0.0253191
0.50764	240.7	63.276	0.0253104
0.50768	163.3	63.2521	0.0253008
0.50772	82.54	63.2257	0.0252903
0.50776	41.7	63.197	0.0252788
0.5078	-44.83	63.1659	0.0252664
0.50784	-10.79	63.1325	0.025253
0.50788	-35.21	63.0966	0.0252386
0.50792	-33.18	63.0582	0.0252233
0.50796	-16.83	63.0171	0.0252069
0.508	-21.13	62.9734	0.0251893
0.50804	36.29	62.9266	0.0251707
0.50808	78.78	62.8768	0.0251507
0.50812	69.53	62.8236	0.0251294
0.50816	56.9	62.7668	0.0251067
0.5082	43.32	62.7062	0.0250825
0.50824	-6.855	62.6416	0.0250566
0.50828	-39.66	62.5728	0.0250291
0.50832	-66.07	62.4994	0.0249998
0.50836	-63.88	62.4212	0.0249685
0.5084	-35.24	62.3379	0.0249352
0.50844	-5.699	62.249	0.0248996
0.50848	6.295	62.1542	0.0248617
0.50852	36.99	62.0529	0.0248212
0.50856	57.42	61.9448	0.0247779
0.5086	35.86	61.8292	0.0247317
0.50864	50.25	61.7057	0.0246823
0.50868	41.7	61.5738	0.0246295
0.50872	16.9	61.433	0.0245732
0.50876	0.4573	61.2828	0.0245131
0.5088	6.7	61.1226	0.024449
0.50884	-13.85	60.9518	0.0243807
0.50888	6.093	60.7699	0.024308
0.50892	30.86	60.5763	0.0242305
0.50896	32.97	60.3704	0.0241481
0.509	65.14	60.1514	0.0240606
0.50904	96.32	59.9187	0.0239675
0.50908	100.5	59.6718	0.0238687
0.50912	98.78	59.4099	0.023764
0.50916	56.55	59.1324	0.023653
0.5092	14.53	58.8388	0.0235355
0.50924	3.116	58.5283	0.0234113
0.50928	19.33	58.2005	0.0232802
0.50932	60.25	57.8545	0.0231418
0.50936	104.7	57.4898	0.0229959
0.5094	123.3	57.1057	0.0228423
0.50944	129.9	56.7015	0.0226806
0.50948	127.3	56.2768	0.0225107
0.50952	120	55.8307	0.0223323
0.50956	146.9	55.3629	0.0221452
0.5096	137.7	54.8727	0.0219491
0.50964	134.6	54.3598	0.0217439
0.50968	108.4	53.8235	0.0215294
0.50972	92.45	53.2634	0.0213054
0.50976	140.6	52.6792	0.0210717
0.5098	171.1	52.0705	0.0208282
0.50984	208	51.4369	0.0205748
0.50988	230.2	50.7781	0.0203112
0.50992	203.3	50.0938	0.0200375
0.50996	219.1	49.3839	0.0197536
0.51	208.1	48.6483	0.0194593
0.51004	200	47.8868	0.0191547
0.51008	208.6	47.0996	0.0188398
0.51012	186.4	46.2866	0.0185146
0.51016	180.5	45.4481	0.0181792
0.5102	190.4	44.5842	0.0178337
0.51024	229.2	43.6951	0.017478
0.51028	230.3	42.7812	0.0171125
0.51032	246.7	41.8429	0.0167372
0.51036	243.9	40.8806	0.0163522
0.5104	284.4	39.8948	0.0159579
0.51044	240.5	38.8862	0.0155545
0.51048	199.9	37.8555	0.0151422
0.51052	152.8	36.8035	0.0147214
0.51056	89.76	35.731	0.0142924
0.5106	31.9	34.6389	0.0138556
0.51064	-13.68	33.5281	0.0134112
0.51068	-36.85	32.3996	0.0129598
0.51072	-91.71	31.2543	0.0125017
0.51076	-105	30.0929	0.0120372
0.5108	-97.03	28.9165	0.0115666
0.51084	-43.59	27.7256	0.0110902
0.51088	-4.803	26.5211	0.0106085
0.51092	31.44	25.3038	0.0101215
0.51096	68.09	24.0741	0.00962966
0.511	84.33	22.833	0.0091332
0.51104	104.6	21.581	0.00863241
0.51108	54.13	20.319	0.00812759
0.51112	26.73	19.0476	0.00761903
0.51116	-21.8	17.7676	0.00710705
0.5112	-66.97	16.4799	0.00659196
0.51124	-83.99	15.1851	0.00607405
0.51128	-63.67	13.8841	0.00555362
0.51132	-57.69	12.5774	0.00503095
0.51136	-29.37	11.2658	0.0045063
0.5114	14.36	9.94983	0.00397993
0.51144	18.52	8.63022	0.00345209
0.51148	34.62	7.30755	0.00292302
0.51152	59.44	5.98244	0.00239298
0.51156	38.95	4.65554	0.00186222
0.5116	23.03	3.32749	0.001331
0.51164	12.16	1.99897	0.000799586
0.51168	-19.22	0.670632	0.000268253
0.51172	-56.59	-0.656833	-0.000262733
0.51176	-74.02	-1.98276	-0.000793106
0.5118	-58.36	-3.30651	-0.00132261
0.51184	-60.87	-4.62746	-0.00185098
0.51188	-21.45	-5.945	-0.002378
0.51192	6.816	-7.25855	-0.00290342
0.51196	67.31	-8.56753	-0.00342701
0.512	21.41	-9.87136	-0.00394854
0.51204	1.642	-11.1694	-0.00446778
0.51208	-20.06	-12.4612	-0.00498446
0.51212	2.654	-13.7459	-0.00549835
0.51216	-27.75	-15.023	-0.00600919
0.5122	-74.89	-16.2919	-0.00651674
0.51224	-68.27	-17.5519	-0.00702075
0.51228	-76.54	-18.8025	-0.00752098
0.51232	-123.9	-20.043	-0.0080172
0.51236	-104.1	-21.273	-0.00850919
0.5124	-94.57	-22.4919	-0.00899675
0.51244	-19.05	-23.6992	-0.00947967
0.51248	49.36	-24.8944	-0.00995777
0.51252	51.58	-26.0772	-0.0104309
0.51256	-1.797	-27.2469	-0.0108988
0.5126	-58.1	-28.4032	-0.0113613
0.51264	-11.83	-29.5454	-0.0118182
0.51268	-84.19	-30.6731	-0.0122692
0.51272	-144.8	-31.7858	-0.0127143
0.51276	-176.7	-32.8829	-0.0131531
0.5128	-170.9	-33.964	-0.0135856
0.51284	-185.1	-35.0288	-0.0140115
0.51288	-190.1	-36.0768	-0.0144307
0.51292	-127.2	-37.1078	-0.0148431
0.51296	-88.47	-38.1216	-0.0152486
0.513	33.12	-39.118	-0.0156472
0.51304	87.62	-40.0968	-0.0160387
0.51308	74.99	-41.0577	-0.0164231
0.51312	61.73	-42.0006	-0.0168002
0.51316	16.01	-42.9251	-0.01717
0.5132	-81.85	-43.831	-0.0175324
0.51324	-146.6	-44.7178	-0.0178871
0.51328	-147.5	-45.5853	-0.0182341
0.51332	-203.5	-46.4332	-0.0185733
0.51336	-103.6	-47.2612	-0.0189045
0.5134	-35.87	-48.0691	-0.0192276
0.51344	-41.48	-48.8567	-0.0195427
0.51348	-15.18	-49.6238	-0.0198495
0.51352	-8.704	-50.3703	-0.0201481
0.51356	30.08	-51.0959	-0.0204384
0.5136	70.46	-51.8005	-0.0207202
0.51364	24.42	-52.4837	-0.0209935
0.51368	-17.81	-53.1453	-0.0212581
0.51372	-34.86	-53.785	-0.021514
0.51376	-84.8	-54.4025	-0.021761
0.5138	-130	-54.9973	-0.0219989
0.51384	-163.9	-55.5692	-0.0222277
0.51388	-125.3	-56.1179	-0.0224472
0.51392	-109.8	-56.6432	-0.0226573
0.51396	-101.4	-57.1447	-0.0228579
0.514	-35.12	-57.6222	-0.0230489
0.51404	-61.74	-58.0757	-0.0232303
0.51408	-64.37	-58.5047	-0.0234019
0.51412	-57.89	-58.9093	-0.0235637
0.51416	-121.1	-59.2891	-0.0237156
0.5142	-178.3	-59.644	-0.0238576
0.51424	-153.8	-59.9738	-0.0239895
0.51428	-147.6	-60.2783	-0.0241113
0.51432	-155.2	-60.5576	-0.024223
0.51436	-162.7	-60.8115	-0.0243246
0.5144	-183.9	-61.0399	-0.024416
0.51444	-157.1	-61.2431	-0.0244972
0.51448	-159.7	-61.4209	-0.0245684
0.51452	-166.2	-61.5736	-0.0246294
0.51456	-108.5	-61.7012	-0.0246805
0.5146	-40.78	-61.804	-0.0247216
0.51464	-31.85	-61.8822	-0.0247529
0.51468	-53.62	-61.9359	-0.0247743
0.51472	-25.52	-61.9653	-0.0247861
0.51476	-107.2	-61.9706	-0.0247883
0.5148	-136.1	-61.9521	-0.0247808
0.51484	-142.6	-61.9099	-0.0247639
0.51488	-154.2	-61.8442	-0.0247377
0.51492	-108.3	-61.7552	-0.0247021
0.51496	-84.14	-61.6434	-0.0246574
0.515	-69.31	-61.5089	-0.0246036
0.51504	-57.55	-61.3521	-0.0245408
0.51508	-43.5	-61.1732	-0.0244693
0.51512	-67.98	-60.9727	-0.0243891
0.51516	-61.62	-60.7508	-0.0243003
0.5152	-37.87	-60.5079	-0.0242032
0.51524	-20.64	-60.2442	-0.0240977
0.51528	-41.45	-59.96	-0.023984
0.51532	-63.56	-59.6557	-0.0238623
0.51536	-94.34	-59.3315	-0.0237326
0.5154	-116.9	-58.9877	-0.0235951
0.51544	-130.3	-58.6247	-0.0234499
0.51548	-134.1	-58.2427	-0.0232971
0.51552	-92.86	-57.842	-0.0231368
0.51556	-69.05	-57.4232	-0.0229693
0.5156	-64.97	-56.9865	-0.0227946
0.51564	-104.9	-56.5323	-0.0226129
0.51568	-130.8	-56.0611	-0.0224244
0.51572	-101.5	-55.5732	-0.0222293
0.51576	-88.53	-55.0692	-0.0220277
0.5158	-85.84	-54.5495	-0.0218198
0.51584	-66.36	-54.0146	-0.0216058
0.51588	-50.29	-53.4649	-0.021386
0.51592	-48.85	-52.901	-0.0211604
0.51596	-94.57	-52.3233	-0.0209293
0.516	-123.3	-51.7324	-0.020693
0.51604	-109.9	-51.1288	-0.0204515
0.51608	-80.35	-50.513	-0.0202052
0.51612	-75.49	-49.8856	-0.0199542
0.51616	-96.1	-49.2471	-0.0196989
0.5162	-67.26	-48.5982	-0.0194393
0.51624	-61.04	-47.9395	-0.0191758
0.51628	-70.09	-47.2715	-0.0189086
0.51632	-33.39	-46.5948	-0.0186379
0.51636	-40.76	-45.9102	-0.0183641
0.5164	-8.444	-45.2182	-0.0180873
0.51644	3.058	-44.5195	-0.0178078
0.51648	4.966	-43.8146	-0.0175258
0.51652	5.226	-43.1041	-0.0172416
0.51656	-17.63	-42.3886	-0.0169554
0.5166	-24.02	-41.6687	-0.0166675
0.51664	-16.68	-40.9448	-0.0163779
0.51668	-18.44	-40.2176	-0.016087
0.51672	-10.81	-39.4875	-0.015795
0.51676	-15.18	-38.7551	-0.015502
0.5168	25.43	-38.0208	-0.0152083
0.51684	39.88	-37.2852	-0.0149141
0.51688	26.67	-36.5486	-0.0146194
0.51692	30.66	-35.8116	-0.0143246
0.51696	1.469	-35.0746	-0.0140298
0.517	4.446	-34.3379	-0.0137352
0.51704	26.93	-33.6019	-0.0134408
0.51708	-6.45	-32.8669	-0.0131468
0.51712	-13.65	-32.1334	-0.0128534
0.51716	-10.35	-31.4016	-0.0125606
0.5172	-26.28	-30.6718	-0.0122687
0.51724	-33.91	-29.9443	-0.0119777
0.51728	-24.86	-29.2195	-0.0116878
0.51732	-20.29	-28.4976	-0.0113991
0.51736	9.735	-27.779	-0.0111116
0.5174	25.77	-27.0639	-0.0108256
0.51744	6.873	-26.3526	-0.010541
0.51748	53.69	-25.6454	-0.0102581
0.51752	27.39	-24.9425	-0.00997699
0.51756	6.758	-24.2441	-0.00969765
0.5176	-4.6	-23.5505	-0.0094202
0.51764	-4.976	-22.8618	-0.00914472
0.51768	-18.33	-22.1782	-0.00887129
0.51772	-21.59	-21.4999	-0.00859997
0.51776	-27.46	-20.8271	-0.00833083
0.5178	-1.074	-20.1598	-0.00806393
0.51784	-1.826	-19.4984	-0.00779935
0.51788	25.11	-18.8428	-0.00753714
0.51792	10.02	-18.1934	-0.00727737
0.51796	20.98	-17.5502	-0.00702009
0.518	24.27	-16.9134	-0.00676536
0.51804	19.42	-16.283	-0.00651322
0.51808	2.972	-15.6593	-0.0062637
0.51812	6.787	-15.0421	-0.00601684
0.51816	-3.069	-14.4317	-0.00577268
0.5182	-14.74	-13.8281	-0.00553123
0.51824	-10.84	-13.2313	-0.00529252
0.51828	0.255	-12.6415	-0.00505658
0.51832	-4.629	-12.0586	-0.00482343
0.51836	-13.79	-11.4827	-0.00459309
0.5184	14.65	-10.9139	-0.00436558
0.51844	19.47	-10.3523	-0.00414092
0.51848	10.2	-9.79782	-0.00391913
0.51852	31.41	-9.25054	-0.00370022
0.51856	20.72	-8.71049	-0.00348419
0.5186	7.076	-8.17766	-0.00327106
0.51864	3.232	-7.65206	-0.00306082
0.51868	-5.005	-7.13367	-0.00285347
0.51872	10.86	-6.62248	-0.00264899
0.51876	17.54	-6.11848	-0.00244739
0.5188	15.66	-5.62162	-0.00224865
0.51884	31.32	-5.1319	-0.00205276
0.51888	9.185	-4.64924	-0.0018597
0.51892	29.01	-4.17362	-0.00166945
0.51896	11.53	-3.70495	-0.00148198
0.519	28.14	-3.24318	-0.00129727
0.51904	-4.282	-2.7882	-0.00111528
0.51908	22.62	-2.33995	-0.000935979
0.51912	-0.8143	-1.89831	-0.000759324
0.51916	-24.51	-1.46319	-0.000585278
0.5192	-23.99	-1.0345	-0.0004138
0.51924	-21.65	-0.612132	-0.000244853
0.51928	-24.57	-0.196006	-7.84025e-05
0.51932	-2.23	0.213955	8.55818e-05
0.51936	4.272	0.617821	0.000247128
0.5194	12.51	1.01566	0.000406264
0.51944	27.22	1.40754	0.000563016
0.51948	17.42	1.79354	0.000717415
0.51952	24.82	2.17373	0.000869493
0.51956	12.57	2.54822	0.00101929
0.5196	25.17	2.91708	0.00116683
0.51964	9.157	3.28043	0.00131217
0.51968	-38.1	3.63838	0.00145535
0.51972	-24.05	3.99102	0.00159641
0.51976	-27.17	4.33846	0.00173538
0.5198	-45.24	4.68078	0.00187231
0.51984	-38.56	5.01805	0.00200722
0.51988	-9.022	5.35032	0.00214013
0.51992	34.65	5.67764	0.00227105
0.51996	55.46	6.00003	0.00240001
0.52	66.81	6.31756	0.00252702
0.52004	60.89	6.63028	0.00265211
0.52008	40.11	6.93827	0.00277531
0.52012	15.92	7.24163	0.00289665
0.52016	4.388	7.54049	0.0030162
0.5202	-0.323	7.83496	0.00313398
0.52024	-40.84	8.12516	0.00325006
0.52028	-30.03	8.4112	0.00336448
0.52032	-36.02	8.69319	0.00347728
0.52036	-7.606	8.97121	0.00358848
0.5204	11.61	9.24533	0.00369813
0.52044	-3.907	9.5156	0.00380624
0.52048	9.099	9.7821	0.00391284
0.52052	6.382	10.0449	0.00401795
0.52056	0.8042	10.304	0.00412159
0.5206	-7.635	10.5595	0.00422379
0.52064	-15.55	10.8114	0.00432455
0.52068	-24.51	11.0598	0.00442391
0.52072	-24.6	11.3047	0.00452186
0.52076	-31.48	11.5461	0.00461843
0.5208	-22.61	11.784	0.0047136
0.52084	-3.444	12.0184	0.00480737
0.52088	12.57	12.2494	0.00489974
0.52092	39.01	12.4767	0.00499069
0.52096	59.01	12.7005	0.00508021
0.521	43.29	12.9207	0.00516829
0.52104	22.8	13.1373	0.00525493
0.52108	1.006	13.3503	0.00534013
0.52112	18.69	13.5597	0.00542389
0.52116	2.769	13.7655	0.00550622
0.5212	3.55	13.9678	0.00558711
0.52124	12.39	14.1665	0.00566658
0.52128	17.48	14.3615	0.00574462
0.52132	46.03	14.5531	0.00582123
0.52136	30.98	14.741	0.00589641
0.5214	-7.519	14.9254	0.00597017
0.52144	-41.54	15.1063	0.00604251
0.52148	-3.936	15.2836	0.00611344
0.52152	-35.84	15.4574	0.00618295
0.52156	-10.99	15.6276	0.00625103
0.5216	22.94	15.7942	0.00631766
0.52164	6.642	15.9571	0.00638284
0.52168	12.25	16.1163	0.00644653
0.52172	21.12	16.2718	0.00650872
0.52176	17.68	16.4235	0.00656939
0.5218	8.29	16.5713	0.00662852
0.52184	34.53	16.7152	0.00668608
0.52188	6.873	16.8552	0.00674206
0.52192	16.47	16.9911	0.00679643
0.52196	8.752	17.123	0.00684918
0.522	8.058	17.2507	0.00690029
0.52204	-24.63	17.3743	0.00694972
0.52208	-37.69	17.4937	0.00699746
0.52212	9.59	17.6087	0.00704348
0.52216	31.58	17.7193	0.00708774
0.5222	15.75	17.8255	0.0071302
0.52224	25.02	17.927	0.00717082
0.52228	80.4	18.0239	0.00720957
0.52232	82.54	18.116	0.00724641
0.52236	46.96	18.2033	0.00728131
0.5224	3.636	18.2857	0.00731426
0.52244	-11.13	18.3631	0.00734524
0.52248	44.62	18.4356	0.00737424
0.52252	33.61	18.5031	0.00740123
0.52256	28.72	18.5655	0.00742621
0.5226	-9.976	18.6229	0.00744916
0.52264	22.86	18.6751	0.00747006
0.52268	58.81	18.7223	0.00748891
0.52272	62.94	18.7642	0.00750568
0.52276	37.68	18.801	0.00752038
0.5228	21.93	18.8325	0.007533
0.52284	43.64	18.8588	0.00754354
0.52288	72.16	18.88	0.007552
0.52292	56.18	18.896	0.00755839
0.52296	36.67	18.9068	0.00756273
0.523	18.78	18.9126	0.00756502
0.52304	22.05	18.9133	0.00756531
0.52308	35.02	18.909	0.0075636
0.52312	-11.05	18.8998	0.00755992
0.52316	42.71	18.8858	0.0075543
0.5232	56.41	18.8669	0.00754676
0.52324	33.49	18.8433	0.00753733
0.52328	15.34	18.8151	0.00752603
0.52332	56.47	18.7823	0.00751291
0.52336	38.75	18.745	0.00749799
0.5234	39.68	18.7033	0.00748131
0.52344	-21.83	18.6573	0.00746292
0.52348	-16.88	18.6071	0.00744285
0.52352	13.32	18.5529	0.00742115
0.52356	-8.936	18.4946	0.00739785
0.5236	23.55	18.4325	0.00737298
0.52364	-19.92	18.3664	0.00734658
0.52368	15.02	18.2967	0.00731867
0.52372	0.8909	18.2232	0.00728927
0.52376	19.94	18.146	0.0072584
0.5238	50.69	18.0652	0.00722609
0.52384	49.65	17.9809	0.00719237
0.52388	44.27	17.8931	0.00715724
0.52392	39.56	17.8019	0.00712076
0.52396	13.64	17.7073	0.00708294
0.524	6.209	17.6096	0.00704382
0.52404	-2.057	17.5086	0.00700345
0.52408	-13.33	17.4046	0.00696185
0.52412	-1.335	17.2976	0.00691906
0.52416	-10.32	17.1878	0.0068751
0.5242	6.584	17.075	0.00683
0.52424	1.787	16.9595	0.00678379
0.52428	34.13	16.8412	0.00673647
0.52432	6.469	16.7202	0.00668807
0.52436	44.13	16.5965	0.00663861
0.5244	40.98	16.4702	0.0065881
0.52444	9.446	16.3414	0.00653656
0.52448	13.46	16.21	0.00648402
0.52452	28.75	16.0763	0.0064305
0.52456	27.13	15.9401	0.00637604
0.5246	43.81	15.8016	0.00632064
0.52464	4.301	15.6609	0.00626435
0.52468	2.452	15.518	0.00620719
0.52472	2.047	15.373	0.00614919
0.52476	-1.999	15.2259	0.00609038
0.5248	6.555	15.077	0.00603078
0.52484	35.83	14.9261	0.00597043
0.52488	28.29	14.7733	0.00590934
0.52492	43.09	14.6188	0.00584754
0.52496	26.58	14.4626	0.00578505
0.525	4.128	14.3048	0.00572191
0.52504	3.463	14.1454	0.00565816
0.52508	7.307	13.9845	0.00559381
0.52512	6.006	13.8223	0.00552891
0.52516	1.845	13.6587	0.00546349
0.5252	25.2	13.4939	0.00539756
0.52524	7.076	13.3279	0.00533116
0.52528	16.24	13.1608	0.00526432
0.52532	25.72	12.9927	0.00519706
0.52536	-14.14	12.8235	0.00512942
0.5254	5.399	12.6535	0.00506141
0.52544	8.983	12.4827	0.00499307
0.52548	-7.375	12.3111	0.00492443
0.52552	3.983	12.1387	0.00485549
0.52556	-0.3519	11.9657	0.00478629
0.5256	21.84	11.7921	0.00471685
0.52564	5.746	11.6179	0.00464718
0.52568	-42.58	11.4432	0.0045773
0.52572	-18.76	11.2681	0.00450722
0.52576	-14.11	11.0924	0.00443696
0.5258	20.28	10.9163	0.00436653
0.52584	0.8331	10.7398	0.00429591
0.52588	20.11	10.5628	0.00422513
0.52592	-1.566	10.3854	0.00415417
0.52596	5.139	10.2076	0.00408304
0.526	-17.09	10.0293	0.00401174
0.52604	-3.271	9.85066	0.00394026
0.52608	-3.473	9.67152	0.00386861
0.52612	-3.473	9.49193	0.00379677
0.52616	10.54	9.31185	0.00372474
0.5262	-23.42	9.13126	0.0036525
0.52624	21.61	8.95013	0.00358005
0.52628	0.5729	8.76842	0.00350737
0.52632	3.752	8.58609	0.00343444
0.52636	-7.837	8.40311	0.00336125
0.5264	20.02	8.21944	0.00328778
0.52644	53.17	8.03502	0.00321401
0.52648	61.47	7.84984	0.00313993
0.52652	41.64	7.66385	0.00306554
0.52656	17.6	7.47706	0.00299082
0.5266	7.596	7.28947	0.00291579
0.52664	25.11	7.10109	0.00284044
0.52668	60.6	6.91195	0.00276478
0.52672	56.64	6.72207	0.00268883
0.52676	50.98	6.53148	0.00261259
0.5268	43.58	6.34027	0.00253611
0.52684	42.77	6.1485	0.0024594
0.52688	38.09	5.95627	0.00238251
0.52692	32.83	5.76369	0.00230547
0.52696	35.92	5.57088	0.00222835
0.527	-22.35	5.37797	0.00215119
0.52704	-43.5	5.18511	0.00207404
0.52708	-54.34	4.99242	0.00199697
0.52712	-53.41	4.80001	0.00192
0.52716	-39.05	4.60798	0.00184319
0.5272	1.671	4.4164	0.00176656
0.52724	4.619	4.22533	0.00169013
0.52728	4.59	4.03481	0.00161393
0.52732	36.7	3.84491	0.00153796
0.52736	4.012	3.65567	0.00146227
0.5274	2.509	3.46715	0.00138686
0.52744	0.1972	3.27942	0.00131177
0.52748	-6.999	3.09254	0.00123702
0.52752	36.84	2.90657	0.00116263
0.52756	-20.06	2.72158	0.00108863
0.5276	-64.19	2.53762	0.00101505
0.52764	-60.61	2.35476	0.000941904
0.52768	-73.33	2.17303	0.00086921
0.52772	-109.4	1.99243	0.00079697
0.52776	-55.55	1.81294	0.000725175
0.5278	14.94	1.63451	0.000653803
0.52784	-11.77	1.45706	0.000582824
0.52788	41.79	1.28051	0.000512205
0.52792	48.98	1.10478	0.000441913
0.52796	-7.346	0.929807	0.000371923
0.528	-68.85	0.755521	0.000302208
0.52804	-37.66	0.58186	0.000232744
0.52808	-42	0.408746	0.000163498
0.52812	-53.3	0.23608	9.4432e-05
0.52816	39.79	0.0637486	2.54994e-05
0.5282	57.62	-0.10837	-4.33481e-05
0.52824	19.56	-0.280392	-0.000112157
0.52828	56.06	-0.45242	-0.000180968
0.52832	77.71	-0.624536	-0.000249814
0.52836	42.08	-0.796804	-0.000318722
0.5284	16.67	-0.969266	-0.000387706
0.52844	5.949	-1.14194	-0.000456777
0.52848	-11.36	-1.31485	-0.00052594
0.52852	31.12	-1.488	-0.0005952
0.52856	30.8	-1.66139	-0.000664557
0.5286	-4.571	-1.83503	-0.000734014
0.52864	-19.43	-2.00891	-0.000803565
0.52868	-8.329	-2.18302	-0.000873208
0.52872	-7.577	-2.35735	-0.000942939
0.52876	-8.444	-2.53189	-0.00101276
0.5288	14.04	-2.70666	-0.00108266
0.52884	-48.01	-2.88163	-0.00115265
0.52888	-43.5	-3.05683	-0.00122273
0.52892	-46.68	-3.23226	-0.0012929
0.52896	-50.64	-3.40795	-0.00136318
0.529	-24.89	-3.58395	-0.00143358
0.52904	-13.79	-3.76032	-0.00150413
0.52908	-32.2	-3.93714	-0.00157485
0.52912	-2.751	-4.11447	-0.00164579
0.52916	32.77	-4.2924	-0.00171696
0.5292	11.32	-4.47102	-0.00178841
0.52924	19.85	-4.65041	-0.00186016
0.52928	29.42	-4.83062	-0.00193225
0.52932	22.19	-5.01171	-0.00200469
0.52936	9.417	-5.19374	-0.0020775
0.5294	13.29	-5.37673	-0.00215069
0.52944	1.267	-5.56071	-0.00222428
0.52948	-1.797	-5.7457	-0.00229828
0.52952	12.77	-5.93172	-0.00237269
0.52956	-1.71	-6.11879	-0.00244752
0.5296	-40.21	-6.30691	-0.00252276
0.52964	-27.61	-6.49609	-0.00259844
0.52968	-57.43	-6.68636	-0.00267454
0.52972	-34.14	-6.87775	-0.0027511
0.52976	-7.375	-7.07029	-0.00282812
0.5298	12.1	-7.26406	-0.00290562
0.52984	26.64	-7.45909	-0.00298364
0.52988	39.68	-7.65544	-0.00306218
0.52992	37.02	-7.85314	-0.00314126
0.52996	13	-8.05222	-0.00322089
0.53	-9.774	-8.25268	-0.00330107
0.53004	-32.75	-8.45452	-0.00338181
0.53008	-43.76	-8.65773	-0.00346309
0.53012	-20.15	-8.86232	-0.00354493
0.53016	15.89	-9.0683	-0.00362732
0.5302	2.018	-9.27569	-0.00371028
0.53024	12.91	-9.4845	-0.0037938
0.53028	14.19	-9.69474	-0.0038779
0.53032	-1.277	-9.9064	-0.00396256
0.53036	-8.271	-10.1195	-0.00404779
0.5304	18.32	-10.334	-0.00413358
0.53044	12.22	-10.5498	-0.00421992
0.53048	5.833	-10.767	-0.00430681
0.53052	17.54	-10.9856	-0.00439422
0.53056	-0.901	-11.2054	-0.00448214
0.5306	-23.39	-11.4264	-0.00457056
0.53064	-38.56	-11.6486	-0.00465944
0.53068	-59.66	-11.8719	-0.00474877
0.53072	-27.89	-12.0963	-0.00483853
0.53076	-3.676	-12.3218	-0.00492871
0.5308	7.047	-12.5483	-0.00501931
0.53084	30.57	-12.7758	-0.0051103
0.53088	46.67	-13.0042	-0.00520169
0.53092	29.99	-13.2336	-0.00529345
0.53096	0.862	-13.4639	-0.00538555
0.531	-5.323	-13.6949	-0.00547796
0.53104	-9.542	-13.9266	-0.00557064
0.53108	-40.93	-14.1589	-0.00566356
0.53112	-35.78	-14.3917	-0.00575668
0.53116	4.504	-14.6249	-0.00584996
0.5312	0.862	-14.8584	-0.00594337
0.53124	-13.82	-15.0922	-0.00603688
0.53128	-1.97	-15.3261	-0.00613045
0.53132	0.7753	-15.5601	-0.00622404
0.53136	0.4284	-15.794	-0.00631761
0.5314	8.868	-16.0278	-0.00641111
0.53144	13.17	-16.2613	-0.00650452
0.53148	26.84	-16.4944	-0.00659777
0.53152	27.94	-16.727	-0.00669081
0.53156	-20.38	-16.959	-0.00678358
0.5316	-45.06	-17.1901	-0.00687602
0.53164	-36.97	-17.4202	-0.00696806
0.53168	-32.03	-17.6491	-0.00705965
0.53172	-3.502	-17.8768	-0.00715071
0.53176	10.54	-18.103	-0.0072412
0.5318	19.82	-18.3276	-0.00733104
0.53184	42.6	-18.5505	-0.00742018
0.53188	29.19	-18.7714	-0.00750855
0.53192	20.28	-18.9902	-0.00759607
0.53196	-1.884	-19.2066	-0.00768264
0.532	-81.59	-19.4205	-0.00776819
0.53204	-112	-19.6315	-0.00785261
0.53208	-64.86	-19.8396	-0.00793582
0.53212	-16.54	-20.0444	-0.00801776
0.53216	-26.1	-20.2459	-0.00809835
0.5322	-80.52	-20.4438	-0.00817752
0.53224	-57.84	-20.6381	-0.00825522
0.53228	-16.94	-20.8285	-0.00833139
0.53232	-61.33	-21.015	-0.00840598
0.53236	-20.35	-21.1974	-0.00847895
0.5324	-1.161	-21.3756	-0.00855024
0.53244	41.41	-21.5495	-0.00861982
0.53248	2.683	-21.7191	-0.00868762
0.53252	-44.11	-21.884	-0.00875362
0.53256	-47.06	-22.0443	-0.00881773
0.5326	-38.56	-22.1998	-0.00887991
0.53264	-86.97	-22.3503	-0.00894011
0.53268	-72.72	-22.4957	-0.00899828
0.53272	-79.69	-22.6359	-0.00905438
0.53276	-42.89	-22.7709	-0.00910837
0.5328	7.769	-22.9006	-0.00916024
0.53284	1.989	-23.0249	-0.00920995
0.53288	-18.53	-23.1437	-0.0092575
0.53292	-56.04	-23.2571	-0.00930284
0.53296	-45.99	-23.3649	-0.00934595
0.533	-13.65	-23.467	-0.00938681
0.53304	-30.47	-23.5635	-0.0094254
0.53308	-46.88	-23.6543	-0.0094617
0.53312	-38.93	-23.7392	-0.00949568
0.53316	-70.47	-23.8183	-0.00952734
0.5332	-38.79	-23.8916	-0.00955665
0.53324	-60.41	-23.959	-0.00958361
0.53328	-49.14	-24.0205	-0.00960821
0.53332	-61.33	-24.0762	-0.00963047
0.53336	-33.56	-24.1259	-0.00965037
0.5334	3.723	-24.1698	-0.00966794
0.53344	13.69	-24.2079	-0.00968318
0.53348	12.45	-24.2402	-0.0096961
0.53352	-12.55	-24.2667	-0.0097067
0.53356	-44.31	-24.2874	-0.00971498
0.5336	-98.99	-24.3023	-0.00972094
0.53364	-50.78	-24.3114	-0.00972457
0.53368	-62.26	-24.3147	-0.00972589
0.53372	-23.79	-24.3123	-0.00972492
0.53376	-33.59	-24.3041	-0.00972166
0.5338	-47.43	-24.2903	-0.00971613
0.53384	-35.15	-24.2709	-0.00970837
0.53388	-10.9	-24.246	-0.00969839
0.53392	-2.982	-24.2156	-0.00968623
0.53396	-32.26	-24.1797	-0.00967189
0.534	-33.73	-24.1385	-0.00965541
0.53404	-13.85	-24.092	-0.00963682
0.53408	21.67	-24.0403	-0.00961612
0.53412	-39.05	-23.9834	-0.00959335
0.53416	-67.81	-23.9213	-0.00956852
0.5342	-102.5	-23.8541	-0.00954165
0.53424	-75.26	-23.7819	-0.00951277
0.53428	-60.67	-23.7048	-0.00948191
0.53432	-34.74	-23.6228	-0.00944912
0.53436	33.23	-23.5361	-0.00941445
0.5344	35.83	-23.4449	-0.00937795
0.53444	54.27	-23.3491	-0.00933965
0.53448	50.4	-23.249	-0.0092996
0.53452	19.36	-23.1445	-0.00925781
0.53456	-1.739	-23.0358	-0.0092143
0.5346	-38.3	-22.9227	-0.00916907
0.53464	-40.99	-22.8053	-0.00912213
0.53468	-94.02	-22.6837	-0.00907348
0.53472	-62.78	-22.5578	-0.00902312
0.53476	-48.44	-22.4277	-0.00897108
0.5348	-30.47	-22.2934	-0.00891738
0.53484	-23.33	-22.1551	-0.00886203
0.53488	-37.98	-22.0127	-0.00880508
0.53492	13.93	-21.8664	-0.00874654
0.53496	57.86	-21.7161	-0.00868645
0.535	62.88	-21.5621	-0.00862484
0.53504	44.53	-21.4043	-0.0085617
0.53508	16.82	-21.2426	-0.00849705
0.53512	-78.12	-21.0772	-0.00843087
0.53516	-70.55	-20.9079	-0.00836316
0.5352	-95.06	-20.7348	-0.00829391
0.53524	-37.75	-20.5578	-0.00822311
0.53528	-23.65	-20.377	-0.00815078
0.53532	1.729	-20.1923	-0.00807694
0.53536	18.2	-20.004	-0.00800158
0.5354	35.02	-19.8118	-0.00792473
0.53544	49.44	-19.616	-0.00784639
0.53548	-2.317	-19.4164	-0.00776655
0.53552	-47.35	-19.213	-0.0076852
0.53556	-140.6	-19.0058	-0.00760234
0.5356	-140	-18.7949	-0.00751795
0.53564	-116.5	-18.5801	-0.00743204
0.53568	-130	-18.3616	-0.00734464
0.53572	-117.5	-18.1395	-0.00725579
0.53576	-50.73	-17.9139	-0.00716555
0.5358	-7.548	-17.685	-0.00707399
0.53584	36.18	-17.453	-0.00698119
0.53588	50.11	-17.218	-0.00688722
0.53592	10.28	-16.9804	-0.00679215
0.53596	22.02	-16.7401	-0.00669604
0.536	53.92	-16.4974	-0.00659896
0.53604	-19.86	-16.2524	-0.00650095
0.53608	-61.97	-16.0051	-0.00640204
0.53612	-42.72	-15.7557	-0.00630229
0.53616	-86.13	-15.5043	-0.00620174
0.5362	-84.63	-15.2511	-0.00610044
0.53624	-7.664	-14.9961	-0.00599845
0.53628	8.839	-14.7396	-0.00589584
0.53632	14.65	-14.4817	-0.00579269
0.53636	65.37	-14.2226	-0.00568905
0.5364	69.42	-13.9625	-0.00558499
0.53644	41.53	-13.7014	-0.00548055
0.53648	58.92	-13.4395	-0.00537578
0.53652	10.11	-13.1768	-0.00527071
0.53656	-47	-12.9134	-0.00516535
0.5366	-13.59	-12.6493	-0.00505972
0.53664	-47.61	-12.3846	-0.00495385
0.53668	-81.13	-12.1193	-0.00484774
0.53672	-25.61	-11.8536	-0.00474142
0.53676	-0.9299	-11.5873	-0.00463494
0.5368	-3.04	-11.3208	-0.00452831
0.53684	11.09	-11.054	-0.00442159
0.53688	-7.49	-10.787	-0.0043148
0.53692	-11.16	-10.5199	-0.00420797
0.53696	-5.294	-10.2528	-0.00410114
0.537	-21.42	-9.98583	-0.00399433
0.53704	-34.14	-9.71895	-0.00388758
0.53708	-10.84	-9.4523	-0.00378092
0.53712	-14.54	-9.18596	-0.00367438
0.53716	-6.479	-8.92001	-0.003568
0.5372	-12.52	-8.65455	-0.00346182
0.53724	-24.74	-8.38967	-0.00335587
0.53728	3.694	-8.12546	-0.00325018
0.53732	-36.45	-7.86202	-0.00314481
0.53736	-30.44	-7.59944	-0.00303978
0.5374	-18.96	-7.33784	-0.00293514
0.53744	-13.27	-7.07732	-0.00283093
0.53748	9.532	-6.818	-0.0027272
0.53752	17.74	-6.56	-0.002624
0.53756	32.25	-6.30343	-0.00252137
0.5376	35.51	-6.0484	-0.00241936
0.53764	3.839	-5.79499	-0.00231799
0.53768	17.71	-5.54328	-0.00221731
0.53772	25.23	-5.29334	-0.00211733
0.53776	-7.49	-5.04523	-0.00201809
0.5378	-31.31	-4.799	-0.0019196
0.53784	-16.65	-4.5547	-0.00182188
0.53788	-4.976	-4.3124	-0.00172496
0.53792	-43.44	-4.07215	-0.00162886
0.53796	3.781	-3.83403	-0.00153361
0.538	4.041	-3.59811	-0.00143924
0.53804	34.21	-3.36446	-0.00134578
0.53808	43.17	-3.13315	-0.00125326
0.53812	27.88	-2.90424	-0.0011617
0.53816	55.51	-2.67778	-0.00107111
0.5382	33.98	-2.45378	-0.000981514
0.53824	23.29	-2.23226	-0.000892906
0.53828	-16.54	-2.01322	-0.000805286
0.53832	-12.35	-1.79662	-0.000718649
0.53836	-7.693	-1.58247	-0.000632989
0.5384	-27.78	-1.37076	-0.000548302
0.53844	-38.7	-1.16147	-0.000464587
0.53848	-1.017	-0.954614	-0.000381845
0.53852	1.874	-0.750207	-0.000300083
0.53856	26.99	-0.548263	-0.000219305
0.5386	24.59	-0.348796	-0.000139518
0.53864	22.36	-0.151812	-6.07248e-05
0.53868	62.48	0.0426929	1.70772e-05
0.53872	29.65	0.234736	9.38945e-05
0.53876	35.57	0.424352	0.000169741
0.5388	19.36	0.611589	0.000244636
0.53884	6.122	0.796508	0.000318603
0.53888	-27.69	0.979175	0.00039167
0.53892	3.232	1.15966	0.000463864
0.53896	20.92	1.33803	0.000535211
0.539	-0.2652	1.51434	0.000605738
0.53904	2.307	1.68868	0.00067547
0.53908	10.98	1.86109	0.000744437
0.53912	22.91	2.03166	0.000812666
0.53916	30.05	2.20047	0.000880187
0.5392	-2.433	2.36759	0.000947034
0.53924	1.18	2.5331	0.00101324
0.53928	-10.03	2.69711	0.00107885
0.53932	-19.17	2.8597	0.00114388
0.53936	-21.1	3.02096	0.00120838
0.5394	-22.03	3.18095	0.00127238
0.53944	3.579	3.33975	0.0013359
0.53948	15.43	3.49741	0.00139897
0.53952	24.27	3.65401	0.0014616
0.53956	38.06	3.80959	0.00152383
0.5396	45.11	3.96423	0.00158569
0.53964	-5.265	4.11802	0.00164721
0.53968	-0.4675	4.27105	0.00170842
0.53972	-2.086	4.42341	0.00176936
0.53976	4.388	4.57519	0.00183008
0.5398	4.128	4.7265	0.0018906
0.53984	-13.1	4.87742	0.00195097
0.53988	-33.94	5.02804	0.00201122
0.53992	-6.681	5.17844	0.00207138
0.53996	22.34	5.32869	0.00213148
0.54	4.128	5.47887	0.00219155
0.54004	58.23	5.62904	0.00225161
0.54008	55.02	5.77927	0.00231171
0.54012	34.1	5.92967	0.00237187
0.54016	-51.22	6.08033	0.00243213
0.5402	-63.76	6.23137	0.00249255
0.54024	-20.9	6.38288	0.00255315
0.54028	-102.3	6.53493	0.00261397
0.54032	-129.4	6.68758	0.00267503
0.54036	-20.15	6.84083	0.00273633
0.5404	-2.635	6.99467	0.00279787
0.54044	-1.681	7.14906	0.00285962
0.54048	107.4	7.30394	0.00292158
0.54052	114	7.45927	0.00298371
0.54056	99.5	7.61505	0.00304602
0.5406	179.8	7.7713	0.00310852
0.54064	117.7	7.92809	0.00317124
0.54068	19.27	8.08554	0.00323422
0.54072	65.34	8.24383	0.00329753
0.54076	-28.15	8.40312	0.00336125
0.5408	-187.3	8.56361	0.00342544
0.54084	-142.5	8.72545	0.00349018
0.54088	-127.8	8.88877	0.00355551
0.54092	-145.4	9.05362	0.00362145
0.54096	-7.953	9.21998	0.00368799
0.541	66.61	9.38783	0.00375513
0.54104	72.19	9.55709	0.00382284
0.54108	134.3	9.72773	0.00389109
0.54112	157	9.89973	0.00395989
0.54116	40.14	10.0731	0.00402925
0.5412	33.23	10.2479	0.00409918
0.54124	3.319	10.4243	0.00416973
0.54128	-95.09	10.6023	0.00424094
0.54132	-100.1	10.7821	0.00431283
0.54136	-69.95	10.9636	0.00438545
0.5414	-135.1	11.1469	0.00445878
0.54144	-112.6	11.332	0.00453282
0.54148	15.34	11.5188	0.00460754
0.54152	29.73	11.7073	0.0046829
0.54156	80.17	11.8971	0.00475886
0.5416	154.9	12.0884	0.00483536
0.54164	124.1	12.281	0.00491239
0.54168	94.41	12.4748	0.00498992
0.54172	85.8	12.6699	0.00506796
0.54176	-56.19	12.8663	0.00514652
0.5418	-122	13.0641	0.00522563
0.54184	-81.22	13.2633	0.0053053
0.54188	-116.8	13.4638	0.00538553
0.54192	-124.4	13.6657	0.00546629
0.54196	8.723	13.8689	0.00554755
0.542	38.23	14.0732	0.00562926
0.54204	23.75	14.2784	0.00571136
0.54208	71.9	14.4845	0.00579379
0.54212	61.24	14.6912	0.0058765
0.54216	85.54	14.8986	0.00595944
0.5422	116.4	15.1064	0.00604257
0.54224	35.95	15.3147	0.00612586
0.54228	-18.01	15.5233	0.00620931
0.54232	11.53	15.7322	0.00629289
0.54236	-27.63	15.9415	0.00637659
0.5424	-119.7	16.151	0.0064604
0.54244	-26.22	16.3607	0.00654428
0.54248	36.44	16.5705	0.00662821
0.54252	53.09	16.7803	0.00671213
0.54256	119	16.99	0.006796
0.5426	192	17.1994	0.00687978
0.54264	135.1	17.4086	0.00696345
0.54268	141.6	17.6176	0.00704702
0.54272	74.36	17.8263	0.00713051
0.54276	-46.13	18.0348	0.00721394
0.5428	10.83	18.2434	0.00729736
0.54284	-52.29	18.4521	0.00738082
0.54288	-57.69	18.6609	0.00746436
0.54292	-31.04	18.87	0.00754799
0.54296	7.509	19.0793	0.00763173
0.543	-32.92	19.289	0.0077156
0.54304	5.949	19.499	0.0077996
0.54308	73.98	19.7093	0.00788373
0.54312	107.8	19.92	0.00796799
0.54316	105.2	20.131	0.00805238
0.5432	134.6	20.3423	0.00813693
0.54324	77.71	20.5542	0.00822167
0.54328	26.96	20.7666	0.00830664
0.54332	-64.95	20.9797	0.0083919
0.54336	-77.23	21.1937	0.0084775
0.5434	-99.43	21.4087	0.00856348
0.54344	-64.8	21.6247	0.00864988
0.54348	-57.98	21.8418	0.00873671
0.54352	-10.41	22.0599	0.00882397
0.54356	101.6	22.2791	0.00891164
0.5436	27.08	22.4993	0.00899972
0.54364	58.38	22.7204	0.00908818
0.54368	99.21	22.9426	0.00917703
0.54372	116.4	23.1657	0.00926626
0.54376	51.38	23.3897	0.0093559
0.5438	55.95	23.6149	0.00944595
0.54384	35.6	23.8411	0.00953645
0.54388	-22.46	24.0686	0.00962744
0.54392	-44.17	24.2974	0.00971894
0.54396	-79.71	24.5275	0.00981099
0.544	-78.27	24.759	0.00990359
0.54404	-26.19	24.9919	0.00999676
0.54408	-72.2	25.2262	0.0100905
0.54412	-8.358	25.4618	0.0101847
0.54416	53.2	25.6987	0.0102795
0.5442	51.01	25.9366	0.0103747
0.54424	48.78	26.1756	0.0104703
0.54428	91.38	26.4156	0.0105662
0.54432	62.45	26.6564	0.0106626
0.54436	54.16	26.8981	0.0107592
0.5444	77.94	27.1405	0.0108562
0.54444	-8.936	27.3837	0.0109535
0.54448	-30.38	27.6277	0.0110511
0.54452	14.82	27.8723	0.0111489
0.54456	-46.3	28.1176	0.011247
0.5446	-73.18	28.3635	0.0113454
0.54464	4.995	28.61	0.011444
0.54468	-17.46	28.8568	0.0115427
0.54472	-54.28	29.104	0.0116416
0.54476	53.17	29.3512	0.0117405
0.5448	5.486	29.5985	0.0118394
0.54484	109.6	29.8455	0.0119382
0.54488	112.8	30.0921	0.0120369
0.54492	55.43	30.3383	0.0121353
0.54496	14.13	30.5837	0.0122335
0.545	20.28	30.8284	0.0123314
0.54504	-3.011	31.0723	0.0124289
0.54508	-39.72	31.3151	0.012526
0.54512	-47.06	31.5568	0.0126227
0.54516	-21.51	31.7972	0.0127189
0.5452	-27.58	32.0361	0.0128144
0.54524	23.55	32.2733	0.0129093
0.54528	91.41	32.5085	0.0130034
0.54532	14.62	32.7416	0.0130967
0.54536	40.57	32.9724	0.013189
0.5454	49.85	33.2005	0.0132802
0.54544	25.05	33.4258	0.0133703
0.54548	-4.658	33.6481	0.0134592
0.54552	-16.77	33.8671	0.0135469
0.54556	-50.29	34.0827	0.0136331
0.5456	-28.68	34.2944	0.0137178
0.54564	-15.81	34.5022	0.0138009
0.54568	-25.26	34.7055	0.0138822
0.54572	-5.063	34.9043	0.0139617
0.54576	35.14	35.0979	0.0140392
0.5458	29.04	35.2862	0.0141145
0.54584	49.91	35.4687	0.0141875
0.54588	102	35.6451	0.0142581
0.54592	17.1	35.815	0.014326
0.54596	34.39	35.9781	0.0143912
0.546	19.01	36.1339	0.0144536
0.54604	-35.06	36.2823	0.0145129
0.54608	-57.37	36.4226	0.0145691
0.54612	-23.1	36.5547	0.0146219
0.54616	-28.47	36.6781	0.0146712
0.5462	11.15	36.7923	0.0147169
0.54624	39.13	36.8969	0.0147588
0.54628	28.38	36.9914	0.0147965
0.54632	43.17	37.0752	0.0148301
0.54636	57.42	37.148	0.0148592
0.5464	0.3995	37.2093	0.0148837
0.54644	-12.29	37.2585	0.0149034
0.54648	28.29	37.2952	0.0149181
0.54652	-0.1496	37.3189	0.0149276
0.54656	-22.06	37.329	0.0149316
0.5466	-5.092	37.325	0.01493
0.54664	28.84	37.3064	0.0149226
0.54668	64.7	37.2727	0.0149091
0.54672	144.9	37.2231	0.0148893
0.54676	196.6	37.1573	0.0148629
0.5468	206.1	37.0747	0.0148299
0.54684	280.9	36.9748	0.0147899
0.54688	304.9	36.8573	0.0147429
0.54692	239.3	36.7219	0.0146888
0.54696	213.5	36.5684	0.0146273
0.547	187.9	36.3966	0.0145587
0.54704	282.5	36.2067	0.0144827
0.54708	284.8	35.9985	0.0143994
0.54712	190.4	35.7722	0.0143089
0.54716	211.8	35.5281	0.0142113
0.5472	118.3	35.2665	0.0141066
0.54724	86.09	34.9876	0.013995
0.54728	172.2	34.6919	0.0138767
0.54732	144.7	34.3797	0.0137519
0.54736	239.8	34.0516	0.0136207
0.5474	233.7	33.7081	0.0134833
0.54744	99.41	33.3498	0.0133399
0.54748	47.34	32.9773	0.0131909
0.54752	-72.58	32.5913	0.0130365
0.54756	-171.5	32.1925	0.012877
0.5476	-102	31.7816	0.0127126
0.54764	-70.81	31.3591	0.0125436
0.54768	-104.7	30.9256	0.0123702
0.54772	-27.14	30.4815	0.0121926
0.54776	25.05	30.0273	0.0120109
0.5478	-44.92	29.5635	0.0118254
0.54784	81	29.0904	0.0116362
0.54788	88.61	28.6084	0.0114434
0.54792	3.839	28.1179	0.0112472
0.54796	95.17	27.6194	0.0110478
0.548	75.08	27.1133	0.0108453
0.54804	-47.17	26.6	0.01064
0.54808	-75.61	26.0799	0.010432
0.54812	-29.46	25.5535	0.0102214
0.54816	-138	25.0211	0.0100085
0.5482	-80.52	24.4832	0.00979329
0.54824	-11.54	23.94	0.00957601
0.54828	-14.37	23.3919	0.00935675
0.54832	43.29	22.839	0.00913558
0.54836	88.26	22.2816	0.00891262
0.5484	66.12	21.7199	0.00868796
0.54844	101.6	21.1543	0.0084617
0.54848	123.5	20.5849	0.00823397
0.54852	22.39	20.0122	0.00800489
0.54856	-1.71	19.4365	0.0077746
0.5486	10.43	18.8581	0.00754323
0.54864	-69.51	18.2773	0.00731094
0.54868	-103.6	17.6946	0.00707785
0.54872	-13.59	17.1102	0.00684408
0.54876	-19.43	16.5244	0.00660975
0.5488	-38.56	15.9374	0.00637496
0.54884	23.72	15.3495	0.0061398
0.54888	33.64	14.7609	0.00590436
0.54892	-0.6698	14.1718	0.00566873
0.54896	30.75	13.5825	0.00543301
0.549	10.43	12.9932	0.00519727
0.54904	-35.47	12.404	0.00496161
0.54908	19.56	11.8153	0.00472611
0.54912	-15.55	11.2272	0.00449087
0.54916	-72.11	10.6399	0.00425596
0.5492	-65.47	10.0537	0.00402146
0.54924	-29.14	9.4686	0.00378744
0.54928	-75.09	8.88488	0.00355395
0.54932	-12.58	8.30261	0.00332104
0.54936	-4.311	7.72188	0.00308875
0.5494	-13.79	7.14279	0.00285711
0.54944	8.983	6.56539	0.00262616
0.54948	57.05	5.98977	0.00239591
0.54952	23.49	5.41599	0.0021664
0.54956	34.33	4.84415	0.00193766
0.5496	-3.126	4.27432	0.00170973
0.54964	-86.85	3.70662	0.00148265
0.54968	-37.06	3.14114	0.00125646
0.54972	-10.38	2.57794	0.00103118
0.54976	-70.35	2.01709	0.000806835
0.5498	-74.19	1.45862	0.000583446
0.54984	-6.999	0.902539	0.000361016
0.54988	-3.965	0.348858	0.000139543
0.54992	0.6308	-0.202443	-8.0977e-05
0.54996	20.69	-0.751379	-0.000300552
0.55	38.4	-1.29797	-0.000519186
0.55004	61.67	-1.84221	-0.000736883
0.55008	65.63	-2.38409	-0.000953638
0.55012	61.44	-2.92359	-0.00116944
0.55016	23.46	-3.46064	-0.00138426
0.5502	-1.537	-3.99517	-0.00159807
0.55024	-32.61	-4.52708	-0.00181083
0.55028	-71.04	-5.05628	-0.00202251
0.55032	-38.65	-5.58269	-0.00223308
0.55036	-41.48	-6.10626	-0.0024425
0.5504	-40.7	-6.62693	-0.00265077
0.55044	8.81	-7.14468	-0.00285787
0.55048	40.8	-7.65946	-0.00306379
0.55052	42.1	-8.17126	-0.00326851
0.55056	16.18	-8.68003	-0.00347201
0.5506	13.58	-9.18571	-0.00367429
0.55064	15.31	-9.68823	-0.00387529
0.55068	5.977	-10.1875	-0.004075
0.55072	-4.716	-10.6834	-0.00427337
0.55076	-52.69	-11.1759	-0.00447037
0.5508	-34.37	-11.6649	-0.00466596
0.55084	-23.42	-12.1502	-0.0048601
0.55088	-69.28	-12.6319	-0.00505276
0.55092	-54.51	-13.1098	-0.00524392
0.55096	-28.5	-13.5839	-0.00543355
0.551	-22.37	-14.0541	-0.00562165
0.55104	-1.97	-14.5205	-0.00580819
0.55108	11.21	-14.9829	-0.00599318
0.55112	41.64	-15.4415	-0.00617659
0.55116	33.98	-15.896	-0.00635841
0.5512	0.3417	-16.3465	-0.00653861
0.55124	-11.45	-16.7929	-0.00671717
0.55128	-3.502	-17.2351	-0.00689404
0.55132	-17.69	-17.673	-0.0070692
0.55136	-36.88	-18.1065	-0.00724261
0.5514	-33.1	-18.5356	-0.00741423
0.55144	-10.58	-18.96	-0.00758402
0.55148	-6.306	-19.3799	-0.00775194
0.55152	3.694	-19.7949	-0.00791798
0.55156	2.914	-20.2052	-0.00808208
0.5516	18.67	-20.6105	-0.0082442
0.55164	1.035	-21.0108	-0.00840431
0.55168	14.82	-21.4059	-0.00856235
0.55172	-7.201	-21.7957	-0.00871827
0.55176	4.85	-22.18	-0.00887202
0.5518	-10.96	-22.5588	-0.00902352
0.55184	-29.54	-22.9318	-0.00917271
0.55188	-13.56	-23.2988	-0.00931953
[truncated: 23,003 more rows]

## Sheet: Sheet2
0.69192	10.75	0.0897349	3.58939e-05
0.69196	-59.31	0.6313	0.00025252
0.692	-34.66	1.19372	0.000477488
0.69204	-25.03	1.77745	0.00071098
0.69208	-20.12	2.38294	0.000953174
0.69212	-27.63	3.01061	0.00120424
0.69216	17.39	3.66089	0.00146436
0.6922	34.33	4.3342	0.00173368
0.69224	-11.02	5.03096	0.00201238
0.69228	-18.68	5.75158	0.00230063
0.69232	8.087	6.49649	0.0025986
0.69236	28.75	7.2661	0.00290644
0.6924	0.6597	8.06083	0.00322433
0.69244	-22.98	8.88109	0.00355244
0.69248	-19.54	9.72729	0.00389092
0.69252	3.925	10.5998	0.00423994
0.69256	-55.41	11.4992	0.00459966
0.6926	-54.11	12.4256	0.00497023
0.69264	-52.32	13.3795	0.0053518
0.69268	14.56	14.3613	0.0057445
0.69272	43.95	15.3712	0.00614847
0.69276	18.49	16.4095	0.00656382
0.6928	-22.78	17.4767	0.00699068
0.69284	-9.456	18.573	0.00742919
0.69288	18.35	19.6986	0.00787946
0.69292	-28.13	20.854	0.00834162
0.69296	-26.83	22.0394	0.00881577
0.693	-48.39	23.2551	0.00930204
0.69304	-31.45	24.5013	0.00980052
0.69308	-37.17	25.7783	0.0103113
0.69312	1.845	27.0862	0.0108345
0.69316	8.579	28.4253	0.0113701
0.6932	2.48	29.7957	0.0119183
0.69324	9.677	31.1975	0.012479
0.69328	6.642	32.6311	0.0130524
0.69332	-20.35	34.0964	0.0136385
0.69336	40.17	35.5936	0.0142374
0.6934	68.72	37.1228	0.0148491
0.69344	63.52	38.6842	0.0154737
0.69348	51.12	40.2779	0.0161111
0.69352	39.97	41.9039	0.0167616
0.69356	74.85	43.5625	0.017425
0.6936	42.54	45.2538	0.0181015
0.69364	-1.363	46.9779	0.0187912
0.69368	-24.37	48.735	0.019494
0.69372	-44.89	50.5252	0.0202101
0.69376	-15.03	52.3486	0.0209395
0.6938	14.73	54.2053	0.0216821
0.69384	2.856	56.0953	0.0224381
0.69388	-2.086	58.0186	0.0232074
0.69392	-4.022	59.9752	0.0239901
0.69396	1.671	61.9651	0.0247861
0.694	25.77	63.9883	0.0255953
0.69404	64.76	66.0447	0.0264179
0.69408	90.43	68.1341	0.0272537
0.69412	81.35	70.2566	0.0281026
0.69416	29.73	72.412	0.0289648
0.6942	-29.4	74.6003	0.0298401
0.69424	-78.88	76.8213	0.0307285
0.69428	-111.3	79.0749	0.0316299
0.69432	-91.88	81.3609	0.0325443
0.69436	14.3	83.679	0.0334716
0.6944	35.89	86.0289	0.0344116
0.69444	112.4	88.4102	0.0353641
0.69448	116.8	90.8227	0.0363291
0.69452	111.1	93.2657	0.0373063
0.69456	97.16	95.7392	0.0382957
0.6946	64.01	98.2425	0.039297
0.69464	13.61	100.775	0.0403102
0.69468	-48.3	103.338	0.041335
0.69472	-38.53	105.928	0.0423714
0.69476	-75.29	108.548	0.043419
0.6948	-89.25	111.195	0.0444778
0.69484	-45.73	113.869	0.0455474
0.69488	-22.46	116.569	0.0466277
0.69492	14.97	119.295	0.0477182
0.69496	51.44	122.047	0.0488187
0.695	99.56	124.822	0.0499288
0.69504	137.4	127.621	0.0510483
0.69508	160.2	130.442	0.0521767
0.69512	124.3	133.284	0.0533137
0.69516	48.61	136.147	0.0544589
0.6952	12.19	139.03	0.055612
0.69524	-19.89	141.932	0.0567727
0.69528	-37.61	144.851	0.0579405
0.69532	-29.46	147.788	0.0591151
0.69536	13.17	150.74	0.060296
0.6954	72.57	153.707	0.0614827
0.69544	90.54	156.687	0.0626747
0.69548	105.8	159.679	0.0638716
0.69552	100.3	162.682	0.0650729
0.69556	95.57	165.695	0.066278
0.6956	69.88	168.716	0.0674864
0.69564	60.72	171.744	0.0686975
0.69568	52.97	174.777	0.0699109
0.69572	33.58	177.815	0.0711259
0.69576	26.9	180.855	0.0723419
0.6958	47.1	183.896	0.0735583
0.69584	43.87	186.936	0.0747745
0.69588	11.76	189.974	0.0759898
0.69592	45.8	193.009	0.0772035
0.69596	42.88	196.037	0.078415
0.696	14.99	199.058	0.0796234
0.69604	-0.7854	202.07	0.080828
0.69608	44.53	205.07	0.0820281
0.69612	2.741	208.057	0.0832227
0.69616	0.7753	211.028	0.0844111
0.6962	-19.22	213.981	0.0855923
0.69624	-49.89	216.914	0.0867655
0.69628	0.05273	219.824	0.0879297
0.69632	10.89	222.71	0.0890838
0.69636	48.43	225.567	0.090227
0.6964	120.7	228.395	0.091358
0.69644	144.2	231.19	0.0924759
0.69648	121.5	233.949	0.0935794
0.69652	141.2	236.669	0.0946676
0.69656	134.7	239.348	0.0957392
0.6966	83.69	241.983	0.0967931
0.69664	39.39	244.57	0.097828
0.69668	7.943	247.107	0.0988429
0.69672	-27.98	249.591	0.0998365
0.69676	-61.8	252.019	0.100807
0.6968	-72.6	254.386	0.101755
0.69684	-123.2	256.691	0.102676
0.69688	-115.4	258.928	0.103571
0.69692	-64.63	261.095	0.104438
0.69696	135.9	263.188	0.105275
0.697	705.9	265.203	0.106081
0.69704	1234	267.136	0.106854
0.69708	1720	268.982	0.107593
0.69712	2420	270.74	0.108296
0.69716	2792	272.405	0.108962
0.6972	2609	273.977	0.109591
0.69724	2504	275.453	0.110181
0.69728	2363	276.835	0.110734
0.69732	2176	278.122	0.111249
0.69736	2042	279.317	0.111727
0.6974	1734	280.421	0.112168
0.69744	1407	281.437	0.112575
0.69748	953.4	282.37	0.112948
0.69752	385.8	283.224	0.11329
0.69756	130.6	284.002	0.113601
0.6976	18.67	284.709	0.113884
0.69764	-34.89	285.349	0.11414
0.69768	129.8	285.927	0.114371
0.69772	229.7	286.447	0.114579
0.69776	208.4	286.912	0.114765
0.6978	175.1	287.328	0.114931
0.69784	123.2	287.697	0.115079
0.69788	-3.618	288.024	0.11521
0.69792	-2.057	288.313	0.115325
0.69796	74.3	288.568	0.115427
0.698	87.59	288.792	0.115517
0.69804	15.54	288.989	0.115596
0.69808	-100.9	289.162	0.115665
0.69812	-228.2	289.315	0.115726
0.69816	-259.6	289.451	0.11578
0.6982	-257	289.572	0.115829
0.69824	-195.8	289.683	0.115873
0.69828	-122.7	289.785	0.115914
0.69832	-48.56	289.881	0.115953
0.69836	87.39	289.973	0.115989
0.6984	201.2	290.064	0.116026
0.69844	209.1	290.155	0.116062
0.69848	209.4	290.248	0.116099
0.69852	160.4	290.345	0.116138
0.69856	54.53	290.449	0.116179
0.6986	8.174	290.56	0.116224
0.69864	86.52	290.682	0.116273
0.69868	77.05	290.815	0.116326
0.69872	-14.74	290.961	0.116384
0.69876	-13.01	291.122	0.116449
0.6988	7.307	291.298	0.116519
0.69884	-14.74	291.492	0.116597
0.69888	38.9	291.705	0.116682
0.69892	131.1	291.936	0.116775
0.69896	128.7	292.189	0.116875
0.699	81.79	292.462	0.116985
0.69904	206.2	292.758	0.117103
0.69908	176.5	293.076	0.11723
0.69912	11.96	293.417	0.117367
0.69916	31.24	293.783	0.117513
0.6992	113.6	294.173	0.117669
0.69924	67.28	294.589	0.117835
0.69928	102.9	295.029	0.118012
0.69932	182.1	295.495	0.118198
0.69936	130.1	295.987	0.118395
0.6994	117.1	296.505	0.118602
0.69944	98.4	297.049	0.11882
0.69948	23.29	297.618	0.119047
0.69952	44.04	298.214	0.119286
0.69956	48.9	298.835	0.119534
0.6996	82.05	299.482	0.119793
0.69964	94.1	300.153	0.120061
0.69968	2.567	300.849	0.12034
0.69972	17.88	301.569	0.120627
0.69976	37.36	302.312	0.120925
0.6998	52.28	303.077	0.121231
0.69984	38.09	303.864	0.121546
0.69988	57.16	304.671	0.121868
0.69992	110.3	305.498	0.122199
0.69996	78.32	306.343	0.122537
0.7	-11.74	307.205	0.122882
0.70004	107.9	308.082	0.123233
0.70008	228.4	308.973	0.123589
0.70012	283.3	309.877	0.123951
0.70016	381	310.791	0.124317
0.7002	419	311.715	0.124686
0.70024	463.5	312.646	0.125059
0.70028	381.5	313.584	0.125434
0.70032	255.9	314.526	0.12581
0.70036	259.6	315.471	0.126188
0.7004	314.9	316.418	0.126567
0.70044	294	317.364	0.126946
0.70048	357.2	318.31	0.127324
0.70052	399.1	319.252	0.127701
0.70056	332.9	320.19	0.128076
0.7006	358.7	321.122	0.128449
0.70064	388.7	322.046	0.128818
0.70068	422.3	322.962	0.129185
0.70072	507.7	323.867	0.129547
0.70076	648.7	324.76	0.129904
0.7008	753.4	325.641	0.130256
0.70084	869.3	326.507	0.130603
0.70088	959.3	327.359	0.130943
0.70092	1052	328.194	0.131278
0.70096	1114	329.013	0.131605
0.701	1154	329.815	0.131926
0.70104	1213	330.6	0.13224
0.70108	1175	331.369	0.132548
0.70112	1036	332.123	0.132849
0.70116	915.6	332.862	0.133145
0.7012	700.1	333.588	0.133435
0.70124	440.7	334.302	0.133721
0.70128	230.8	335.007	0.134003
0.70132	16.61	335.703	0.134281
0.70136	-127.1	336.392	0.134557
0.7014	-217.7	337.077	0.134831
0.70144	-278	337.758	0.135103
0.70148	-233.5	338.436	0.135375
0.70152	-96.77	339.114	0.135645
0.70156	-3.849	339.79	0.135916
0.7016	171.4	340.466	0.136187
0.70164	289.8	341.143	0.136457
0.70168	334.1	341.82	0.136728
0.70172	345.6	342.499	0.136999
0.70176	306.5	343.178	0.137271
0.7018	192.8	343.86	0.137544
0.70184	59.44	344.543	0.137817
0.70188	-18.85	345.229	0.138091
0.70192	-133.3	345.916	0.138367
0.70196	-178.1	346.606	0.138643
0.702	-136.5	347.298	0.138919
0.70204	-42.55	347.992	0.139197
0.70208	32.28	348.687	0.139475
0.70212	135.2	349.382	0.139753
0.70216	266.2	350.076	0.14003
0.7022	325	350.769	0.140308
0.70224	296.6	351.459	0.140584
0.70228	302.4	352.146	0.140858
0.70232	295.8	352.828	0.141131
0.70236	184.4	353.504	0.141402
0.7024	85.83	354.174	0.14167
0.70244	-16.59	354.836	0.141934
0.70248	-47.98	355.488	0.142195
0.70252	-8.647	356.13	0.142452
0.70256	102	356.76	0.142704
0.7026	186.7	357.376	0.14295
0.70264	193	357.976	0.143191
0.70268	277.1	358.559	0.143424
0.70272	332.6	359.122	0.143649
0.70276	367.2	359.664	0.143866
0.7028	350.2	360.182	0.144073
0.70284	427.5	360.675	0.14427
0.70288	731.6	361.14	0.144456
0.70292	911.5	361.577	0.144631
0.70296	1122	361.982	0.144793
0.703	1444	362.354	0.144942
0.70304	1639	362.693	0.145077
0.70308	1734	362.996	0.145199
0.70312	1711	363.265	0.145306
0.70316	1576	363.499	0.1454
0.7032	1421	363.699	0.14548
0.70324	1277	363.866	0.145546
0.70328	1125	364.001	0.1456
0.70332	984.2	364.107	0.145643
0.70336	840.3	364.186	0.145675
0.7034	692.3	364.241	0.145696
0.70344	486.6	364.273	0.145709
0.70348	282.8	364.287	0.145715
0.70352	69.33	364.284	0.145714
0.70356	-92.92	364.268	0.145707
0.7036	-188.5	364.241	0.145697
0.70364	-191.5	364.207	0.145683
0.70368	-130.7	364.167	0.145667
0.70372	-102.6	364.123	0.145649
0.70376	-33.41	364.078	0.145631
0.7038	23.72	364.033	0.145613
0.70384	161.1	363.99	0.145596
0.70388	241.2	363.95	0.14558
0.70392	324.5	363.916	0.145566
0.70396	347.5	363.887	0.145555
0.704	326.7	363.865	0.145546
0.70404	172.9	363.853	0.145541
0.70408	6.729	363.851	0.14554
0.70412	-129.9	363.859	0.145544
0.70416	-246.6	363.88	0.145552
0.7042	-239.7	363.915	0.145566
0.70424	-191.4	363.963	0.145585
0.70428	-62.26	364.025	0.14561
0.70432	28.75	364.101	0.145641
0.70436	197.2	364.193	0.145677
0.7044	224	364.298	0.145719
0.70444	317.2	364.418	0.145767
0.70448	327.7	364.551	0.14582
0.70452	309	364.698	0.145879
0.70456	246.4	364.859	0.145944
0.7046	155.9	365.033	0.146013
0.70464	96.44	365.219	0.146088
0.70468	7.769	365.418	0.146167
0.70472	-15.5	365.628	0.146251
0.70476	-67.72	365.85	0.14634
0.7048	-50.09	366.081	0.146432
0.70484	37.6	366.322	0.146529
0.70488	114.7	366.571	0.146628
0.70492	179.6	366.826	0.14673
0.70496	276.2	367.087	0.146835
0.705	390	367.352	0.146941
0.70504	402.2	367.619	0.147047
0.70508	431.5	367.887	0.147155
0.70512	553.3	368.154	0.147262
0.70516	588.6	368.419	0.147368
0.7052	654.8	368.681	0.147472
0.70524	776	368.938	0.147575
0.70528	772.3	369.189	0.147676
0.70532	825	369.433	0.147773
0.70536	831.9	369.669	0.147868
0.7054	810.7	369.897	0.147959
0.70544	802.7	370.116	0.148046
0.70548	782.8	370.326	0.14813
0.70552	749.7	370.526	0.14821
0.70556	826.7	370.716	0.148286
0.7056	838.6	370.897	0.148359
0.70564	823	371.07	0.148428
0.70568	882.9	371.233	0.148493
0.70572	858.2	371.389	0.148556
0.70576	801.1	371.539	0.148615
0.7058	783.7	371.682	0.148673
0.70584	691.9	371.821	0.148729
0.70588	643	371.957	0.148783
0.70592	550.4	372.092	0.148837
0.70596	417.8	372.227	0.148891
0.706	360.7	372.364	0.148945
0.70604	226.7	372.504	0.149002
0.70608	153.9	372.65	0.14906
0.70612	118.1	372.803	0.149121
0.70616	80.95	372.965	0.149186
0.7062	49.47	373.137	0.149255
0.70624	25.57	373.321	0.149328
0.70628	2.047	373.517	0.149407
0.70632	-6.595	373.728	0.149491
0.70636	26.27	373.954	0.149581
0.7064	-19.89	374.195	0.149678
0.70644	13	374.453	0.149781
0.70648	89.1	374.728	0.149891
0.70652	77.1	375.021	0.150008
0.70656	104.2	375.331	0.150133
0.7066	121.8	375.66	0.150264
0.70664	72.71	376.006	0.150402
0.70668	52.83	376.371	0.150548
0.70672	30.86	376.753	0.150701
0.70676	35.98	377.152	0.150861
0.7068	56.32	377.569	0.151027
0.70684	60.95	378.002	0.151201
0.70688	82.91	378.45	0.15138
0.70692	115.3	378.914	0.151566
0.70696	137.9	379.392	0.151757
0.707	146.1	379.882	0.151953
0.70704	193.3	380.385	0.152154
0.70708	250	380.898	0.152359
0.70712	334.4	381.42	0.152568
0.70716	424.2	381.95	0.15278
0.7072	554.7	382.487	0.152995
0.70724	659.1	383.028	0.153211
0.70728	695.9	383.574	0.15343
0.70732	778.4	384.122	0.153649
0.70736	785.8	384.673	0.153869
0.7074	804.1	385.223	0.154089
0.70744	798.9	385.774	0.15431
0.70748	705.6	386.325	0.15453
0.70752	593	386.874	0.15475
0.70756	570.2	387.422	0.154969
0.7076	577.3	387.969	0.155187
0.70764	538.7	388.513	0.155405
0.70768	542.5	389.056	0.155623
0.70772	612.8	389.598	0.155839
0.70776	637.4	390.138	0.156055
0.7078	637.2	390.676	0.15627
0.70784	635.4	391.213	0.156485
0.70788	645.9	391.749	0.1567
0.70792	633.9	392.285	0.156914
0.70796	614.8	392.82	0.157128
0.708	606.5	393.357	0.157343
0.70804	589.6	393.895	0.157558
0.70808	564.9	394.435	0.157774
0.70812	542.5	394.978	0.157991
0.70816	467.4	395.526	0.15821
0.7082	374.6	396.079	0.158431
0.70824	293.9	396.637	0.158655
0.70828	216.3	397.203	0.158881
0.70832	133.8	397.778	0.159111
0.70836	52.16	398.361	0.159344
0.7084	-11.94	398.954	0.159582
0.70844	-47.61	399.558	0.159823
0.70848	-82.43	400.173	0.160069
0.70852	-103.7	400.799	0.16032
0.70856	-62.17	401.437	0.160575
0.7086	12.6	402.086	0.160834
0.70864	84.3	402.747	0.161099
0.70868	166.9	403.418	0.161367
0.70872	197.4	404.1	0.16164
0.70876	196.6	404.792	0.161917
0.7088	180.7	405.493	0.162197
0.70884	143.1	406.202	0.162481
0.70888	133.4	406.919	0.162768
0.70892	82.22	407.642	0.163057
0.70896	132.9	408.371	0.163348
0.709	248	409.104	0.163642
0.70904	362.9	409.84	0.163936
0.70908	517.3	410.577	0.164231
0.70912	652.3	411.314	0.164526
0.70916	786.9	412.05	0.16482
0.7092	871.6	412.784	0.165114
0.70924	890.2	413.514	0.165406
0.70928	905	414.24	0.165696
0.70932	842.7	414.961	0.165984
0.70936	768.8	415.676	0.16627
0.7094	662.9	416.384	0.166554
0.70944	606.7	417.087	0.166835
0.70948	548.3	417.782	0.167113
0.70952	523.4	418.472	0.167389
0.70956	535.5	419.154	0.167662
0.7096	535.2	419.83	0.167932
0.70964	553	420.499	0.1682
0.70968	542.5	421.162	0.168465
0.70972	521.9	421.819	0.168728
0.70976	485.8	422.47	0.168988
0.7098	489.8	423.115	0.169246
0.70984	478.5	423.754	0.169502
0.70988	546.3	424.389	0.169755
0.70992	600	425.018	0.170007
0.70996	648.5	425.644	0.170257
0.71	721.2	426.265	0.170506
0.71004	758.8	426.883	0.170753
0.71008	749.5	427.498	0.170999
0.71012	700.5	428.111	0.171245
0.71016	631.6	428.724	0.171489
0.7102	519.6	429.336	0.171734
0.71024	431	429.95	0.17198
0.71028	351.6	430.566	0.172226
0.71032	293.2	431.185	0.172474
0.71036	219.6	431.808	0.172723
0.7104	158.4	432.438	0.172975
0.71044	120.7	433.074	0.173229
0.71048	49.56	433.717	0.173487
0.71052	15.14	434.368	0.173747
0.71056	17.68	435.028	0.174011
0.7106	14.39	435.697	0.174279
0.71064	37.74	436.376	0.17455
0.71068	61.24	437.064	0.174826
0.71072	86.41	437.761	0.175105
0.71076	118.9	438.468	0.175387
0.7108	157	439.184	0.175673
0.71084	226.5	439.908	0.175963
0.71088	288.2	440.639	0.176256
0.71092	347.7	441.378	0.176551
0.71096	481.6	442.124	0.176849
0.711	553.6	442.874	0.17715
0.71104	560.7	443.63	0.177452
0.71108	632.3	444.39	0.177756
0.71112	711.7	445.154	0.178061
0.71116	694.6	445.92	0.178368
0.7112	678	446.689	0.178675
0.71124	708.9	447.459	0.178984
0.71128	701.1	448.232	0.179293
0.71132	649.5	449.006	0.179602
0.71136	603.5	449.781	0.179913
0.7114	578.9	450.558	0.180223
0.71144	489.7	451.337	0.180535
0.71148	414	452.116	0.180847
0.71152	406.2	452.898	0.181159
0.71156	381.8	453.681	0.181472
0.7116	368.1	454.466	0.181786
0.71164	407.4	455.252	0.182101
0.71168	486.3	456.041	0.182416
0.71172	559.5	456.831	0.182732
0.71176	600.6	457.623	0.183049
0.7118	679.5	458.417	0.183367
0.71184	762.7	459.214	0.183685
0.71188	771.5	460.012	0.184005
0.71192	781.6	460.813	0.184325
0.71196	767.4	461.617	0.184647
0.712	795.6	462.424	0.18497
0.71204	779	463.236	0.185294
0.71208	704.1	464.053	0.185621
0.71212	665.3	464.876	0.18595
0.71216	598.3	465.706	0.186282
0.7122	555.1	466.544	0.186618
0.71224	503.7	467.391	0.186957
0.71228	373.8	468.249	0.1873
0.71232	294.9	469.119	0.187648
0.71236	236.6	470.001	0.188001
0.7124	133.9	470.898	0.188359
0.71244	24.5	471.809	0.188724
0.71248	-21.8	472.737	0.189095
0.71252	-0.9588	473.681	0.189472
0.71256	-29.31	474.642	0.189857
0.7126	-72.72	475.62	0.190248
0.71264	-27.2	476.616	0.190647
0.71268	8.954	477.63	0.191052
0.71272	139.9	478.66	0.191464
0.71276	200.3	479.708	0.191883
0.7128	270.1	480.771	0.192308
0.71284	335.6	481.85	0.19274
0.71288	442.9	482.943	0.193177
0.71292	536.3	484.051	0.19362
0.71296	623.4	485.17	0.194068
0.713	681.6	486.302	0.194521
0.71304	733	487.446	0.194978
0.71308	778.8	488.599	0.19544
0.71312	728.5	489.763	0.195905
0.71316	705.2	490.936	0.196374
0.7132	657.4	492.117	0.196847
0.71324	670	493.308	0.197323
0.71328	626.4	494.506	0.197802
0.71332	569.1	495.713	0.198285
0.71336	520	496.927	0.198771
0.7134	463.1	498.15	0.19926
0.71344	458.8	499.38	0.199752
0.71348	461.3	500.617	0.200247
0.71352	436.3	501.862	0.200745
0.71356	451.6	503.114	0.201246
0.7136	504.8	504.373	0.201749
0.71364	542.5	505.639	0.202256
0.71368	590.5	506.912	0.202765
0.71372	638.2	508.191	0.203276
0.71376	679	509.476	0.20379
0.7138	726.3	510.768	0.204307
0.71384	730.7	512.065	0.204826
0.71388	713.4	513.369	0.205348
0.71392	690.7	514.68	0.205872
0.71396	665.5	515.997	0.206399
0.714	598.3	517.321	0.206928
0.71404	541.7	518.652	0.207461
0.71408	473.5	519.99	0.207996
0.71412	422.9	521.337	0.208535
0.71416	354.6	522.692	0.209077
0.7142	291.9	524.055	0.209622
0.71424	224	525.428	0.210171
0.71428	188	526.809	0.210724
0.71432	221.7	528.2	0.21128
0.71436	173.9	529.599	0.21184
0.7144	178.5	531.007	0.212403
0.71444	190.1	532.424	0.21297
0.71448	206.2	533.849	0.213539
0.71452	263.4	535.281	0.214112
0.71456	328.9	536.719	0.214688
0.7146	393.7	538.163	0.215265
0.71464	462.8	539.612	0.215845
0.71468	562	541.065	0.216426
0.71472	622.3	542.52	0.217008
0.71476	689	543.978	0.217591
0.7148	790.3	545.436	0.218174
0.71484	819.1	546.894	0.218757
0.71488	885.6	548.35	0.21934
0.71492	869.9	549.806	0.219922
0.71496	872.1	551.258	0.220503
0.715	878.6	552.709	0.221083
0.71504	816.2	554.155	0.221662
0.71508	785.5	555.599	0.22224
0.71512	727.6	557.039	0.222816
0.71516	677.4	558.476	0.22339
0.7152	644.8	559.909	0.223964
0.71524	628.4	561.339	0.224536
0.71528	579.9	562.765	0.225106
0.71532	570.6	564.189	0.225676
0.71536	581.1	565.61	0.226244
0.7154	529.6	567.027	0.226811
0.71544	536.8	568.443	0.227377
0.71548	535	569.855	0.227942
0.71552	579.8	571.266	0.228506
0.71556	571.4	572.675	0.22907
0.7156	611.3	574.081	0.229632
0.71564	648.3	575.486	0.230194
0.71568	651.2	576.889	0.230755
0.71572	683.5	578.29	0.231316
0.71576	673.6	579.69	0.231876
0.7158	704.1	581.089	0.232436
0.71584	622.9	582.488	0.232995
0.71588	591.2	583.885	0.233554
0.71592	516.9	585.283	0.234113
0.71596	446.4	586.681	0.234673
0.716	444.1	588.08	0.235232
0.71604	398.1	589.48	0.235792
0.71608	338.3	590.88	0.236352
0.71612	313.7	592.282	0.236913
0.71616	288.5	593.685	0.237474
0.7162	274	595.089	0.238036
0.71624	276.8	596.494	0.238598
0.71628	286.7	597.9	0.23916
0.71632	309.3	599.306	0.239722
0.71636	353.6	600.712	0.240285
0.7164	374.8	602.116	0.240847
0.71644	443.6	603.519	0.241408
0.71648	488.3	604.919	0.241968
0.71652	567.1	606.315	0.242526
0.71656	666.6	607.707	0.243083
0.7166	737.6	609.093	0.243637
0.71664	815.2	610.473	0.244189
0.71668	904.4	611.845	0.244738
0.71672	973.8	613.209	0.245283
0.71676	1037	614.563	0.245825
0.7168	1041	615.908	0.246363
0.71684	1014	617.244	0.246897
0.71688	994.5	618.568	0.247427
0.71692	958.8	619.883	0.247953
0.71696	891.9	621.187	0.248475
0.717	831.3	622.481	0.248992
0.71704	771.7	623.765	0.249506
0.71708	714	625.04	0.250016
0.71712	660.4	626.306	0.250522
0.71716	642	627.563	0.251025
0.7172	589.5	628.812	0.251525
0.71724	586.4	630.053	0.252021
0.71728	578.1	631.288	0.252515
0.71732	566.7	632.515	0.253006
0.71736	535.6	633.737	0.253495
0.7174	545	634.953	0.253981
0.71744	574	636.163	0.254465
0.71748	577.4	637.368	0.254947
0.71752	566.4	638.569	0.255428
0.71756	585.4	639.765	0.255906
0.7176	592.2	640.957	0.256383
0.71764	569.9	642.145	0.256858
0.71768	583.4	643.329	0.257332
0.71772	563.9	644.51	0.257804
0.71776	557.4	645.688	0.258275
0.7178	532.9	646.862	0.258745
0.71784	531.6	648.033	0.259213
0.71788	476.3	649.201	0.25968
0.71792	476.4	650.366	0.260147
0.71796	443.2	651.528	0.260611
0.718	430.8	652.687	0.261075
0.71804	435.7	653.843	0.261537
0.71808	419	654.994	0.261998
0.71812	463.4	656.142	0.262457
0.71816	476.5	657.285	0.262914
0.7182	516.8	658.423	0.263369
0.71824	551.1	659.555	0.263822
0.71828	581.3	660.681	0.264272
0.71832	647.4	661.799	0.26472
0.71836	700.7	662.91	0.265164
0.7184	764.1	664.012	0.265605
0.71844	816.7	665.105	0.266042
0.71848	875.1	666.187	0.266475
0.71852	936.8	667.259	0.266904
0.71856	981.3	668.319	0.267328
0.7186	980.5	669.368	0.267747
0.71864	1022	670.405	0.268162
0.71868	1000	671.429	0.268572
0.71872	1004	672.442	0.268977
0.71876	993.3	673.441	0.269377
0.7188	951.2	674.429	0.269772
0.71884	901.7	675.405	0.270162
0.71888	885.7	676.37	0.270548
0.71892	830.3	677.324	0.27093
0.71896	760.1	678.268	0.271307
0.719	734.2	679.202	0.271681
0.71904	687.6	680.127	0.272051
0.71908	662	681.044	0.272418
0.71912	638.4	681.954	0.272781
0.71916	596.5	682.856	0.273143
0.7192	611.5	683.753	0.273501
0.71924	622.5	684.645	0.273858
0.71928	606.7	685.532	0.274213
0.71932	634.8	686.414	0.274566
0.71936	621.9	687.293	0.274917
0.7194	630.8	688.169	0.275268
0.71944	606.5	689.043	0.275617
0.71948	581.2	689.915	0.275966
0.71952	561.3	690.785	0.276314
0.71956	539.3	691.654	0.276662
0.7196	526.4	692.523	0.277009
0.71964	525.8	693.391	0.277357
0.71968	510.2	694.26	0.277704
0.71972	488.3	695.128	0.278051
0.71976	495.6	695.996	0.278399
0.7198	482.8	696.865	0.278746
0.71984	479	697.734	0.279094
0.71988	476.8	698.603	0.279441
0.71992	517.4	699.472	0.279789
0.71996	533.1	700.341	0.280136
0.72	561.7	701.208	0.280483
0.72004	604.4	702.075	0.28083
0.72008	619.3	702.94	0.281176
0.72012	686.6	703.802	0.281521
0.72016	714.7	704.661	0.281865
0.7202	797.2	705.517	0.282207
0.72024	853	706.369	0.282548
0.72028	923.6	707.217	0.282887
0.72032	974.9	708.059	0.283224
0.72036	1014	708.897	0.283559
0.7204	1009	709.728	0.283891
0.72044	1018	710.554	0.284221
0.72048	1031	711.373	0.284549
0.72052	1004	712.187	0.284875
0.72056	991.8	712.996	0.285198
0.7206	957.1	713.799	0.285519
0.72064	910.4	714.597	0.285839
0.72068	853.9	715.39	0.286156
0.72072	819.4	716.18	0.286472
0.72076	763.2	716.967	0.286787
0.7208	698.1	717.752	0.287101
0.72084	667.9	718.534	0.287414
0.72088	626.3	719.316	0.287726
0.72092	580.1	720.097	0.288039
0.72096	567.5	720.879	0.288352
0.721	555.4	721.662	0.288665
0.72104	546.2	722.445	0.288978
0.72108	544.6	723.231	0.289293
0.72112	553	724.02	0.289608
0.72116	570.4	724.81	0.289924
0.7212	605.5	725.604	0.290242
0.72124	645.9	726.401	0.29056
0.72128	642.1	727.201	0.29088
0.72132	674.5	728.004	0.291202
0.72136	667.7	728.811	0.291525
0.7214	689.9	729.622	0.291849
0.72144	665.8	730.436	0.292174
0.72148	641.5	731.253	0.292501
0.72152	643.8	732.075	0.29283
0.72156	630.1	732.899	0.29316
0.7216	600.9	733.728	0.293491
0.72164	607.4	734.559	0.293824
0.72168	601.1	735.394	0.294158
0.72172	615.8	736.231	0.294493
0.72176	615.9	737.072	0.294829
0.7218	613.6	737.915	0.295166
0.72184	649.4	738.759	0.295504
0.72188	658.5	739.606	0.295842
0.72192	667.8	740.453	0.296181
0.72196	701.1	741.301	0.296521
0.722	704.8	742.15	0.29686
0.72204	760.7	742.997	0.297199
0.72208	779.3	743.844	0.297538
0.72212	850.7	744.69	0.297876
0.72216	890.4	745.533	0.298213
0.7222	874.1	746.374	0.29855
0.72224	940.6	747.213	0.298885
0.72228	958.3	748.048	0.299219
0.72232	972.5	748.879	0.299552
0.72236	905.8	749.707	0.299883
0.7224	942.3	750.531	0.300212
0.72244	920.6	751.35	0.30054
0.72248	911.4	752.166	0.300867
0.72252	848.5	752.979	0.301191
0.72256	783.5	753.787	0.301515
0.7226	752.8	754.592	0.301837
0.72264	725.4	755.393	0.302157
0.72268	693.1	756.192	0.302477
0.72272	648.4	756.987	0.302795
0.72276	662.1	757.78	0.303112
0.7228	650.1	758.569	0.303428
0.72284	611.5	759.357	0.303743
0.72288	572.2	760.141	0.304057
0.72292	587.6	760.923	0.304369
0.72296	643.3	761.702	0.304681
0.723	660.6	762.479	0.304991
0.72304	654.4	763.252	0.305301
0.72308	653	764.022	0.305609
0.72312	712.2	764.788	0.305915
0.72316	732.9	765.55	0.30622
0.7232	785.6	766.308	0.306523
0.72324	774.5	767.061	0.306824
0.72328	824	767.808	0.307123
0.72332	836	768.551	0.30742
0.72336	833.7	769.287	0.307715
0.7234	815.4	770.018	0.308007
0.72344	811.9	770.742	0.308297
0.72348	827.1	771.459	0.308584
0.72352	797.3	772.169	0.308868
0.72356	792.9	772.872	0.309149
0.7236	735	773.568	0.309427
0.72364	728.7	774.256	0.309702
0.72368	735	774.936	0.309974
0.72372	728.1	775.607	0.310243
0.72376	773.2	776.271	0.310508
0.7238	733.4	776.925	0.31077
0.72384	755.8	777.571	0.311028
0.72388	769.6	778.207	0.311283
0.72392	791.9	778.834	0.311534
0.72396	836.5	779.451	0.31178
0.724	851.4	780.057	0.312023
0.72404	894.6	780.653	0.312261
0.72408	863.4	781.239	0.312495
0.72412	904.8	781.813	0.312725
0.72416	928	782.376	0.31295
0.7242	945.1	782.927	0.313171
0.72424	949.8	783.468	0.313387
0.72428	926.2	783.996	0.313599
0.72432	919.3	784.514	0.313806
0.72436	883.1	785.02	0.314008
0.7244	850.9	785.515	0.314206
0.72444	813.1	786	0.3144
0.72448	775.4	786.473	0.314589
0.72452	751	786.937	0.314775
0.72456	724.7	787.39	0.314956
0.7246	673.4	787.833	0.315133
0.72464	676.3	788.266	0.315306
0.72468	656.4	788.689	0.315476
0.72472	651.8	789.103	0.315641
0.72476	667.4	789.508	0.315803
0.7248	683.6	789.903	0.315961
0.72484	693.2	790.289	0.316115
0.72488	706.4	790.664	0.316266
0.72492	731.6	791.031	0.316412
0.72496	749.8	791.387	0.316555
0.725	784.5	791.733	0.316693
0.72504	812.7	792.069	0.316827
0.72508	848.5	792.394	0.316958
0.72512	849.4	792.709	0.317083
0.72516	863.6	793.012	0.317205
0.7252	914.9	793.305	0.317322
0.72524	895.3	793.587	0.317435
0.72528	914	793.857	0.317543
0.72532	897.1	794.116	0.317647
0.72536	897.1	794.364	0.317746
0.7254	871.4	794.601	0.31784
0.72544	823	794.827	0.317931
0.72548	798.6	795.041	0.318016
0.72552	794.1	795.245	0.318098
0.72556	779	795.438	0.318175
0.7256	778.4	795.62	0.318248
0.72564	725	795.792	0.318317
0.72568	732.6	795.954	0.318382
0.72572	748.4	796.105	0.318442
0.72576	772.3	796.246	0.318499
0.7258	767.4	796.378	0.318551
0.72584	754.8	796.498	0.318599
0.72588	777.7	796.609	0.318644
0.72592	758	796.71	0.318684
0.72596	789.6	796.801	0.31872
0.726	782.6	796.882	0.318753
0.72604	791.2	796.952	0.318781
0.72608	798.6	797.013	0.318805
0.72612	791.4	797.063	0.318825
0.72616	807.5	797.104	0.318841
0.7262	799	797.134	0.318854
0.72624	816	797.154	0.318862
0.72628	804	797.164	0.318865
0.72632	783.3	797.163	0.318865
0.72636	762.4	797.153	0.318861
0.7264	777.2	797.132	0.318853
0.72644	778.2	797.101	0.31884
0.72648	795.4	797.059	0.318824
0.72652	741.5	797.008	0.318803
0.72656	763.9	796.945	0.318778
0.7266	774	796.873	0.318749
0.72664	779.2	796.79	0.318716
0.72668	778.9	796.696	0.318678
0.72672	778.1	796.592	0.318637
0.72676	801.3	796.476	0.318591
0.7268	820.3	796.35	0.31854
0.72684	851.7	796.213	0.318485
0.72688	838.3	796.065	0.318426
0.72692	851.9	795.905	0.318362
0.72696	842.2	795.734	0.318294
0.727	872.7	795.552	0.318221
0.72704	886.9	795.359	0.318143
0.72708	860.4	795.154	0.318062
0.72712	855.9	794.938	0.317975
0.72716	848	794.711	0.317884
0.7272	843.6	794.473	0.317789
0.72724	838.3	794.223	0.317689
0.72728	820	793.963	0.317585
0.72732	807.4	793.693	0.317477
0.72736	789.4	793.412	0.317365
0.7274	833.9	793.12	0.317248
0.72744	770.3	792.818	0.317127
0.72748	755.8	792.507	0.317003
0.72752	764.6	792.185	0.316874
0.72756	741.4	791.854	0.316742
0.7276	736.1	791.514	0.316605
0.72764	737.1	791.164	0.316465
0.72768	737.1	790.804	0.316322
0.72772	740.8	790.436	0.316174
0.72776	740.7	790.059	0.316023
0.7278	743	789.672	0.315869
0.72784	750.4	789.277	0.315711
0.72788	759.7	788.872	0.315549
0.72792	740.8	788.459	0.315383
0.72796	755.2	788.036	0.315214
0.728	742.7	787.604	0.315042
0.72804	738	787.164	0.314865
0.72808	738.5	786.714	0.314685
0.72812	731.4	786.255	0.314502
0.72816	737	785.786	0.314314
0.7282	759.8	785.308	0.314123
0.72824	764.9	784.82	0.313928
0.72828	733.1	784.323	0.313729
0.72832	767.8	783.815	0.313526
0.72836	768.5	783.297	0.313319
0.7284	786	782.769	0.313108
0.72844	771.4	782.231	0.312892
0.72848	814.1	781.681	0.312673
0.72852	801.3	781.121	0.312448
0.72856	816.7	780.55	0.31222
0.7286	816.3	779.967	0.311987
0.72864	833.6	779.373	0.311749
0.72868	842.1	778.767	0.311507
0.72872	854.3	778.149	0.31126
0.72876	860.6	777.52	0.311008
0.7288	878.4	776.878	0.310751
0.72884	889.6	776.225	0.31049
0.72888	843.1	775.56	0.310224
0.72892	858.3	774.883	0.309953
0.72896	852.1	774.193	0.309677
0.729	823.1	773.493	0.309397
0.72904	793.8	772.78	0.309112
0.72908	786.2	772.056	0.308822
0.72912	763.7	771.321	0.308528
0.72916	752.7	770.574	0.30823
0.7292	751.5	769.817	0.307927
0.72924	781.7	769.049	0.307619
0.72928	759.2	768.27	0.307308
0.72932	757.5	767.48	0.306992
0.72936	757.1	766.68	0.306672
0.7294	755.6	765.87	0.306348
0.72944	761.9	765.05	0.30602
0.72948	760.1	764.22	0.305688
0.72952	786.5	763.38	0.305352
0.72956	766.4	762.531	0.305012
0.7296	783.9	761.672	0.304669
0.72964	779.1	760.803	0.304321
0.72968	782.1	759.926	0.30397
0.72972	784.9	759.039	0.303616
0.72976	774.7	758.144	0.303258
0.7298	756.8	757.24	0.302896
0.72984	749.7	756.327	0.302531
0.72988	736.6	755.406	0.302163
0.72992	723.5	754.477	0.301791
0.72996	711.5	753.54	0.301416
0.73	688.7	752.596	0.301038
0.73004	676.1	751.643	0.300657
0.73008	685.9	750.684	0.300273
0.73012	701.5	749.716	0.299887
0.73016	697.3	748.742	0.299497
0.7302	697.2	747.76	0.299104
0.73024	714	746.771	0.298708
0.73028	759.5	745.775	0.29831
0.73032	768.2	744.771	0.297909
0.73036	773.2	743.761	0.297504
0.7304	796.7	742.743	0.297097
0.73044	795.9	741.718	0.296687
0.73048	822.1	740.685	0.296274
0.73052	807.1	739.646	0.295858
0.73056	802.4	738.6	0.29544
0.7306	828.6	737.547	0.295019
0.73064	808.4	736.487	0.294595
0.73068	804.8	735.42	0.294168
0.73072	781.5	734.348	0.293739
0.73076	747.1	733.269	0.293308
0.7308	734.6	732.185	0.292874
0.73084	694.4	731.095	0.292438
0.73088	670.4	730	0.292
0.73092	663	728.899	0.29156
0.73096	640	727.794	0.291118
0.731	625.9	726.685	0.290674
0.73104	618.2	725.571	0.290228
0.73108	613.2	724.452	0.289781
0.73112	635	723.33	0.289332
0.73116	638.4	722.203	0.288881
0.7312	658.6	721.072	0.288429
0.73124	664.3	719.937	0.287975
0.73128	721.4	718.798	0.287519
0.73132	725.4	717.655	0.287062
0.73136	768	716.507	0.286603
0.7314	777.7	715.354	0.286142
0.73144	811.2	714.198	0.285679
0.73148	819.4	713.036	0.285215
0.73152	818.6	711.871	0.284748
0.73156	819.5	710.701	0.28428
0.7316	820.5	709.526	0.28381
0.73164	813.2	708.348	0.283339
0.73168	815.4	707.165	0.282866
0.73172	768.9	705.979	0.282391
0.73176	747.6	704.789	0.281916
0.7318	739.5	703.596	0.281438
0.73184	718	702.4	0.28096
0.73188	674.1	701.201	0.280481
0.73192	655.3	700.001	0.28
0.73196	661.4	698.798	0.279519
0.732	622.2	697.594	0.279038
0.73204	561.2	696.388	0.278555
0.73208	589.3	695.182	0.278073
0.73212	631.1	693.974	0.27759
0.73216	605.7	692.766	0.277106
0.7322	602.7	691.557	0.276623
0.73224	640.5	690.348	0.276139
0.73228	688	689.139	0.275655
0.73232	718.5	687.929	0.275171
0.73236	691.1	686.719	0.274687
0.7324	677.7	685.508	0.274203
0.73244	716.6	684.298	0.273719
0.73248	745.8	683.087	0.273235
0.73252	694.5	681.877	0.272751
0.73256	686.4	680.666	0.272267
0.7326	673.1	679.456	0.271782
0.73264	667.9	678.246	0.271298
0.73268	712.4	677.037	0.270815
0.73272	640.9	675.828	0.270331
0.73276	641.9	674.619	0.269848
0.7328	616.8	673.411	0.269365
0.73284	635	672.204	0.268882
0.73288	613.5	670.998	0.268399
0.73292	589.7	669.793	0.267917
0.73296	580.2	668.589	0.267436
0.733	574.8	667.386	0.266954
0.73304	598.8	666.183	0.266473
0.73308	616.1	664.981	0.265993
0.73312	646.1	663.78	0.265512
0.73316	633.1	662.58	0.265032
0.7332	701.4	661.38	0.264552
0.73324	678.2	660.18	0.264072
0.73328	679.8	658.981	0.263592
0.73332	703.5	657.781	0.263112
0.73336	748.7	656.582	0.262633
0.7334	737	655.382	0.262153
0.73344	727.6	654.182	0.261673
0.73348	724.3	652.982	0.261193
0.73352	715.9	651.781	0.260713
0.73356	738	650.581	0.260232
0.7336	680.7	649.38	0.259752
0.73364	669.9	648.179	0.259272
0.73368	650	646.979	0.258792
0.73372	657.2	645.778	0.258311
0.73376	644.6	644.578	0.257831
0.7338	623	643.378	0.257351
0.73384	576.7	642.179	0.256872
0.73388	563.6	640.98	0.256392
0.73392	579.5	639.782	0.255913
0.73396	557.7	638.585	0.255434
0.734	558.3	637.388	0.254955
0.73404	580.1	636.193	0.254477
0.73408	595	634.998	0.253999
0.73412	620.4	633.803	0.253521
0.73416	610.6	632.61	0.253044
0.7342	643.4	631.417	0.252567
0.73424	632.1	630.224	0.25209
0.73428	666.7	629.032	0.251613
0.73432	643.5	627.84	0.251136
0.73436	663.8	626.648	0.250659
0.7344	687.2	625.457	0.250183
0.73444	707.1	624.266	0.249706
0.73448	704.7	623.074	0.24923
0.73452	649.9	621.883	0.248753
0.73456	660.3	620.692	0.248277
0.7346	621.3	619.502	0.247801
0.73464	606.6	618.312	0.247325
0.73468	597	617.122	0.246849
0.73472	572.6	615.932	0.246373
0.73476	559.1	614.743	0.245897
0.7348	555	613.555	0.245422
0.73484	532.5	612.367	0.244947
0.73488	546.1	611.18	0.244472
0.73492	548.7	609.993	0.243997
0.73496	547.2	608.807	0.243523
0.735	559.5	607.621	0.243048
0.73504	530.6	606.435	0.242574
0.73508	572.2	605.25	0.2421
0.73512	596.9	604.065	0.241626
0.73516	612.2	602.879	0.241152
0.7352	637.3	601.693	0.240677
0.73524	677.2	600.507	0.240203
0.73528	701.3	599.319	0.239728
0.73532	666.6	598.132	0.239253
0.73536	670.8	596.943	0.238777
0.7354	688.4	595.753	0.238301
0.73544	678.9	594.563	0.237825
0.73548	669.6	593.371	0.237348
0.73552	644.6	592.179	0.236871
0.73556	633.5	590.985	0.236394
0.7356	625.2	589.791	0.235916
0.73564	636.5	588.596	0.235439
0.73568	617.9	587.401	0.234961
0.73572	588	586.206	0.234482
0.73576	581	585.01	0.234004
0.7358	543.8	583.814	0.233526
0.73584	535	582.618	0.233047
0.73588	539.1	581.423	0.232569
0.73592	532.4	580.228	0.232091
0.73596	541.2	579.033	0.231613
0.736	538.9	577.839	0.231136
0.73604	535.3	576.645	0.230658
0.73608	509.1	575.452	0.230181
0.73612	526.9	574.26	0.229704
0.73616	552.5	573.069	0.229227
0.7362	561.6	571.878	0.228751
0.73624	554	570.688	0.228275
0.73628	552.8	569.498	0.227799
0.73632	581.2	568.309	0.227324
0.73636	577.7	567.121	0.226848
0.7364	557.1	565.933	0.226373
0.73644	540.7	564.746	0.225898
0.73648	534.6	563.559	0.225424
0.73652	538.2	562.373	0.224949
0.73656	522.2	561.188	0.224475
