# Supplementary material for: Shear Thickening Fluids in Cork Agglomerates: An Exploration of Advantages and Drawbacks
Source: Preprints.org preprint supplement (doi:10.20944/preprints202304.0004.v1), 2023-04-03
Supplement: Supplementary file 10 [file CG_y_20.xlsx]

## Sheet: data
Time - Force (Bridge) - Force	Amplitude - Force (Bridge) - Force	data
0	49.86	-49.86		-1
4e-05	49.17	-49.17
8e-05	19.83	-19.83
0.00012	14.66	-14.66
0.00016	44.28	-44.28
0.0002	52.08	-52.08
0.00024	29.08	-29.08
0.00028	35.26	-35.26
0.00032	46.59	-46.59
0.00036	35.61	-35.61
0.0004	34.54	-34.54
0.00044	37.89	-37.89
0.00048	28.07	-28.07
0.00052	24.98	-24.98
0.00056	50.52	-50.52
0.0006	35.52	-35.52
0.00064	34.17	-34.17
0.00068	34.4	-34.4
0.00072	18.27	-18.27
0.00076	45.5	-45.5
0.0008	8.849	-8.849
0.00084	46.36	-46.36
0.00088	24.72	-24.72
0.00092	38.79	-38.79
0.00096	22.46	-22.46
0.001	30.12	-30.12
0.00104	24.86	-24.86
0.00108	41.28	-41.28
0.00112	43.53	-43.53
0.00116	35.78	-35.78
0.0012	20.58	-20.58
0.00124	32.14	-32.14
0.00128	50.35	-50.35
0.00132	39.98	-39.98
0.00136	37.43	-37.43
0.0014	42.78	-42.78
0.00144	41.97	-41.97
0.00148	26.39	-26.39
0.00152	40.29	-40.29
0.00156	31.83	-31.83
0.0016	56.1	-56.1
0.00164	29.72	-29.72
0.00168	35.38	-35.38
0.00172	36.83	-36.83
0.00176	23.04	-23.04
0.0018	38.15	-38.15
0.00184	26.51	-26.51
0.00188	44.17	-44.17
0.00192	36.88	-36.88
0.00196	28.79	-28.79
0.002	49.22	-49.22
0.00204	43.53	-43.53
0.00208	48.91	-48.91
0.00212	47.72	-47.72
0.00216	16.59	-16.59
0.0022	25.64	-25.64
0.00224	34.83	-34.83
0.00228	37.49	-37.49
0.00232	40.12	-40.12
0.00236	33.01	-33.01
0.0024	36.42	-36.42
0.00244	18.33	-18.33
0.00248	39.86	-39.86
0.00252	49.89	-49.89
0.00256	48.79	-48.79
0.0026	34.25	-34.25
0.00264	5.756	-5.756
0.00268	32.92	-32.92
0.00272	47.2	-47.2
0.00276	46.56	-46.56
0.0028	50.26	-50.26
0.00284	33.3	-33.3
0.00288	31.13	-31.13
0.00292	17.11	-17.11
0.00296	32.81	-32.81
0.003	37.09	-37.09
0.00304	29.31	-29.31
0.00308	45.44	-45.44
0.00312	30.67	-30.67
0.00316	44.48	-44.48
0.0032	33.5	-33.5
0.00324	29.89	-29.89
0.00328	24.4	-24.4
0.00332	28.96	-28.96
0.00336	46.28	-46.28
0.0034	35.06	-35.06
0.00344	39.63	-39.63
0.00348	27.87	-27.87
0.00352	16.19	-16.19
0.00356	53.44	-53.44
0.0036	24.08	-24.08
0.00364	15.41	-15.41
0.00368	51.82	-51.82
0.00372	39.25	-39.25
0.00376	45	-45
0.0038	16.85	-16.85
0.00384	20.44	-20.44
0.00388	19.77	-19.77
0.00392	43.59	-43.59
0.00396	21.25	-21.25
0.004	36.3	-36.3
0.00404	35.5	-35.5
0.00408	57.46	-57.46
0.00412	55.61	-55.61
0.00416	23.04	-23.04
0.0042	44.31	-44.31
0.00424	8.675	-8.675
0.00428	33.5	-33.5
0.00432	35.09	-35.09
0.00436	39.46	-39.46
0.0044	43.79	-43.79
0.00444	31.1	-31.1
0.00448	22.06	-22.06
0.00452	44.74	-44.74
0.00456	33.82	-33.82
0.0046	33.79	-33.79
0.00464	38.1	-38.1
0.00468	31.71	-31.71
0.00472	37.11	-37.11
0.00476	56.51	-56.51
0.0048	95.06	-95.06
0.00484	54.66	-54.66
0.00488	66.8	-66.8
0.00492	93.9	-93.9
0.00496	86.8	-86.8
0.005	55.38	-55.38
0.00504	27.61	-27.61
0.00508	66.65	-66.65
0.00512	101.6	-101.6
0.00516	73.62	-73.62
0.0052	61.85	-61.85
0.00524	41.51	-41.51
0.00528	76.62	-76.62
0.00532	76.04	-76.04
0.00536	78.12	-78.12
0.0054	27.72	-27.72
0.00544	75.9	-75.9
0.00548	112.9	-112.9
0.00552	78.85	-78.85
0.00556	60.09	-60.09
0.0056	39.6	-39.6
0.00564	81.39	-81.39
0.00568	77.32	-77.32
0.00572	109.3	-109.3
0.00576	62.92	-62.92
0.0058	52.37	-52.37
0.00584	50.26	-50.26
0.00588	69.51	-69.51
0.00592	57.84	-57.84
0.00596	49.6	-49.6
0.006	82.55	-82.55
0.00604	82.6	-82.6
0.00608	39.95	-39.95
0.00612	32.09	-32.09
0.00616	62.29	-62.29
0.0062	73.91	-73.91
0.00624	89.54	-89.54
0.00628	49.45	-49.45
0.00632	68.04	-68.04
0.00636	45.15	-45.15
0.0064	81.88	-81.88
0.00644	75.81	-75.81
0.00648	73.1	-73.1
0.00652	23.1	-23.1
0.00656	29.74	-29.74
0.0066	68.56	-68.56
0.00664	80.99	-80.99
0.00668	77.03	-77.03
0.00672	94.22	-94.22
0.00676	57.17	-57.17
0.0068	33.76	-33.76
0.00684	49.02	-49.02
0.00688	62.89	-62.89
0.00692	81.48	-81.48
0.00696	57.63	-57.63
0.007	67.14	-67.14
0.00704	61.94	-61.94
0.00708	45.18	-45.18
0.00712	35.26	-35.26
0.00716	59.95	-59.95
0.0072	57.61	-57.61
0.00724	83.62	-83.62
0.00728	60.18	-60.18
0.00732	55.26	-55.26
0.00736	56.16	-56.16
0.0074	65.15	-65.15
0.00744	80.35	-80.35
0.00748	51.54	-51.54
0.00752	36.62	-36.62
0.00756	30.61	-30.61
0.0076	42.92	-42.92
0.00764	80.18	-80.18
0.00768	72.95	-72.95
0.00772	40.24	-40.24
0.00776	78.7	-78.7
0.0078	21.83	-21.83
0.00784	62.98	-62.98
0.00788	56.88	-56.88
0.00792	45.21	-45.21
0.00796	72.66	-72.66
0.008	29.37	-29.37
0.00804	48.56	-48.56
0.00808	46.16	-46.16
0.00812	68.47	-68.47
0.00816	51.3	-51.3
0.0082	68.79	-68.79
0.00824	69.95	-69.95
0.00828	67.92	-67.92
0.00832	44.74	-44.74
0.00836	37.92	-37.92
0.0084	55.58	-55.58
0.00844	34.74	-34.74
0.00848	54.51	-54.51
0.00852	53.33	-53.33
0.00856	42.11	-42.11
0.0086	28.65	-28.65
0.00864	33.76	-33.76
0.00868	34.05	-34.05
0.00872	56.82	-56.82
0.00876	47.61	-47.61
0.0088	36.1	-36.1
0.00884	45.44	-45.44
0.00888	33.99	-33.99
0.00892	33.56	-33.56
0.00896	43.67	-43.67
0.009	51.19	-51.19
0.00904	37.58	-37.58
0.00908	49.4	-49.4
0.00912	29.48	-29.48
0.00916	24.37	-24.37
0.0092	45.67	-45.67
0.00924	28.36	-28.36
0.00928	30.58	-30.58
0.00932	35.55	-35.55
0.00936	44.57	-44.57
0.0094	23.94	-23.94
0.00944	37.06	-37.06
0.00948	36.88	-36.88
0.00952	46.1	-46.1
0.00956	35.12	-35.12
0.0096	43.96	-43.96
0.00964	47.03	-47.03
0.00968	42.98	-42.98
0.00972	35.29	-35.29
0.00976	34.86	-34.86
0.0098	23.73	-23.73
0.00984	47.23	-47.23
0.00988	18.94	-18.94
0.00992	34.48	-34.48
0.00996	33.13	-33.13
0.01	31.33	-31.33
0.01004	36.07	-36.07
0.01008	16.19	-16.19
0.01012	36.02	-36.02
0.01016	42.46	-42.46
0.0102	55.61	-55.61
0.01024	38.73	-38.73
0.01028	41.1	-41.1
0.01032	42.14	-42.14
0.01036	28.15	-28.15
0.0104	23.47	-23.47
0.01044	25.96	-25.96
0.01048	14.51	-14.51
0.01052	52.08	-52.08
0.01056	48.67	-48.67
0.0106	39.48	-39.48
0.01064	26.88	-26.88
0.01068	25.32	-25.32
0.01072	30.12	-30.12
0.01076	19.6	-19.6
0.0108	31.25	-31.25
0.01084	23.7	-23.7
0.01088	13.01	-13.01
0.01092	30.18	-30.18
0.01096	23.88	-23.88
0.011	20.21	-20.21
0.01104	28.59	-28.59
0.01108	23.53	-23.53
0.01112	22.43	-22.43
0.01116	23.13	-23.13
0.0112	380.8m	-0.3808
0.01124	-399.5m	0.3995
0.01128	14.83	-14.83
0.01132	21.42	-21.42
0.01136	24.05	-24.05
0.0114	15.93	-15.93
0.01144	17.66	-17.66
0.01148	31.02	-31.02
0.01152	19.69	-19.69
0.01156	32.72	-32.72
0.0116	21.77	-21.77
0.01164	13.85	-13.85
0.01168	31.77	-31.77
0.01172	32.92	-32.92
0.01176	35.61	-35.61
0.0118	19.89	-19.89
0.01184	27.2	-27.2
0.01188	36.07	-36.07
0.01192	26.74	-26.74
0.01196	33.13	-33.13
0.012	18.5	-18.5
0.01204	23.91	-23.91
0.01208	22.14	-22.14
0.01212	27.03	-27.03
0.01216	15.7	-15.7
0.0122	29.28	-29.28
0.01224	27.32	-27.32
0.01228	5.496	-5.496
0.01232	19.11	-19.11
0.01236	10.96	-10.96
0.0124	25.09	-25.09
0.01244	21.19	-21.19
0.01248	30.09	-30.09
0.01252	15.09	-15.09
0.01256	18.56	-18.56
0.0126	18.62	-18.62
0.01264	11.45	-11.45
0.01268	18.56	-18.56
0.01272	20	-20
0.01276	31.22	-31.22
0.0128	24.05	-24.05
0.01284	13.79	-13.79
0.01288	22.06	-22.06
0.01292	21.31	-21.31
0.01296	13.42	-13.42
0.013	21.07	-21.07
0.01304	15.12	-15.12
0.01308	32.43	-32.43
0.01312	20.06	-20.06
0.01316	22.29	-22.29
0.0132	16.8	-16.8
0.01324	24.4	-24.4
0.01328	44.57	-44.57
0.01332	10.67	-10.67
0.01336	29.98	-29.98
0.0134	12.81	-12.81
0.01344	27.06	-27.06
0.01348	25.35	-25.35
0.01352	9.398	-9.398
0.01356	15.41	-15.41
0.0136	30.73	-30.73
0.01364	37.75	-37.75
0.01368	18.47	-18.47
0.01372	29.54	-29.54
0.01376	33.24	-33.24
0.0138	11.07	-11.07
0.01384	23.96	-23.96
0.01388	45.44	-45.44
0.01392	24.02	-24.02
0.01396	40.87	-40.87
0.014	21.13	-21.13
0.01404	21.83	-21.83
0.01408	26.48	-26.48
0.01412	34.77	-34.77
0.01416	22.52	-22.52
0.0142	39.77	-39.77
0.01424	33.7	-33.7
0.01428	44.83	-44.83
0.01432	33.7	-33.7
0.01436	27.87	-27.87
0.0144	24.57	-24.57
0.01444	27.2	-27.2
0.01448	28.96	-28.96
0.01452	26.25	-26.25
0.01456	17.78	-17.78
0.0146	31.65	-31.65
0.01464	34.25	-34.25
0.01468	30.87	-30.87
0.01472	32.11	-32.11
0.01476	17.84	-17.84
0.0148	-6.064	6.064
0.01484	20.15	-20.15
0.01488	19.48	-19.48
0.01492	26.77	-26.77
0.01496	-25.14	25.14
0.015	-17.02	17.02
0.01504	23.82	-23.82
0.01508	-22.19	22.19
0.01512	-32.19	32.19
0.01516	-31.82	31.82
0.0152	10.93	-10.93
0.01524	9.225	-9.225
0.01528	-3.665	3.665
0.01532	6.19	-6.19
0.01536	4.398	-4.398
0.0154	-31.84	31.84
0.01544	-24.01	24.01
0.01548	5.149	-5.149
0.01552	33.99	-33.99
0.01556	12.09	-12.09
0.0156	13.13	-13.13
0.01564	-6.006	6.006
0.01568	7.462	-7.462
0.01572	29.57	-29.57
0.01576	6.999	-6.999
0.0158	10.21	-10.21
0.01584	-10.05	10.05
0.01588	25.67	-25.67
0.01592	29.98	-29.98
0.01596	2.866	-2.866
0.016	16.45	-16.45
0.01604	3.271	-3.271
0.01608	12.63	-12.63
0.01612	-10.49	10.49
0.01616	23.47	-23.47
0.0162	3.358	-3.358
0.01624	12.78	-12.78
0.01628	20.78	-20.78
0.01632	11.48	-11.48
0.01636	23.18	-23.18
0.0164	1.797	-1.797
0.01644	14.05	-14.05
0.01648	9.831	-9.831
0.01652	1.046	-1.046
0.01656	14.63	-14.63
0.0166	13.42	-13.42
0.01664	16.25	-16.25
0.01668	1.335	-1.335
0.01672	12.43	-12.43
0.01676	2.606	-2.606
0.0168	7.548	-7.548
0.01684	26.13	-26.13
0.01688	32.37	-32.37
0.01692	4.34	-4.34
0.01696	12.17	-12.17
0.017	3.907	-3.907
0.01704	10.79	-10.79
0.01708	37.43	-37.43
0.01712	11.07	-11.07
0.01716	19.69	-19.69
0.0172	843.2m	-0.8432
0.01724	-890.9m	0.8909
0.01728	-13.09	13.09
0.01732	4.196	-4.196
0.01736	5.149	-5.149
0.0174	-486.2m	0.4862
0.01744	37.84	-37.84
0.01748	4.803	-4.803
0.01752	31.65	-31.65
0.01756	11.45	-11.45
0.0176	15.96	-15.96
0.01764	37.66	-37.66
0.01768	-4.446	4.446
0.01772	8.618	-8.618
0.01776	35.55	-35.55
0.0178	22.2	-22.2
0.01784	19.95	-19.95
0.01788	37.69	-37.69
0.01792	33.91	-33.91
0.01796	28.62	-28.62
0.018	5.872	-5.872
0.01804	21.33	-21.33
0.01808	41.68	-41.68
0.01812	19.05	-19.05
0.01816	31.36	-31.36
0.0182	17.06	-17.06
0.01824	27.03	-27.03
0.01828	47.81	-47.81
0.01832	24.51	-24.51
0.01836	30.21	-30.21
0.0184	26.1	-26.1
0.01844	29.77	-29.77
0.01848	3.878	-3.878
0.01852	27.84	-27.84
0.01856	28.36	-28.36
0.0186	14.37	-14.37
0.01864	49.66	-49.66
0.01868	35.12	-35.12
0.01872	33.18	-33.18
0.01876	25.09	-25.09
0.0188	20.15	-20.15
0.01884	18.07	-18.07
0.01888	32.03	-32.03
0.01892	33.24	-33.24
0.01896	35.03	-35.03
0.019	-8.636	8.636
0.01904	24.37	-24.37
0.01908	29.28	-29.28
0.01912	34.92	-34.92
0.01916	19.25	-19.25
0.0192	35.38	-35.38
0.01924	14.77	-14.77
0.01928	43.56	-43.56
0.01932	33.94	-33.94
0.01936	24.4	-24.4
0.0194	33.44	-33.44
0.01944	29.02	-29.02
0.01948	23.88	-23.88
0.01952	20.58	-20.58
0.01956	37.11	-37.11
0.0196	24.37	-24.37
0.01964	44.43	-44.43
0.01968	18.39	-18.39
0.01972	35.03	-35.03
0.01976	41.65	-41.65
0.0198	43.62	-43.62
0.01984	13.85	-13.85
0.01988	16.71	-16.71
0.01992	36.28	-36.28
0.01996	36.1	-36.1
0.02	26.13	-26.13
0.02004	48.59	-48.59
0.02008	28.36	-28.36
0.02012	27.55	-27.55
0.02016	46.68	-46.68
0.0202	39.11	-39.11
0.02024	25.93	-25.93
0.02028	38.7	-38.7
0.02032	20.84	-20.84
0.02036	21.36	-21.36
0.0204	32.43	-32.43
0.02044	32.58	-32.58
0.02048	30.99	-30.99
0.02052	54.17	-54.17
0.02056	32.23	-32.23
0.0206	33.39	-33.39
0.02064	22.81	-22.81
0.02068	34.22	-34.22
0.02072	43.88	-43.88
0.02076	35.84	-35.84
0.0208	42.63	-42.63
0.02084	25.35	-25.35
0.02088	41.45	-41.45
0.02092	26.42	-26.42
0.02096	41.13	-41.13
0.021	28.65	-28.65
0.02104	40.5	-40.5
0.02108	48.27	-48.27
0.02112	34.17	-34.17
0.02116	15.84	-15.84
0.0212	45.9	-45.9
0.02124	31.62	-31.62
0.02128	19.25	-19.25
0.02132	37.03	-37.03
0.02136	27.87	-27.87
0.0214	32.58	-32.58
0.02144	23.15	-23.15
0.02148	21.16	-21.16
0.02152	32.66	-32.66
0.02156	35.9	-35.9
0.0216	30.64	-30.64
0.02164	47	-47
0.02168	18.1	-18.1
0.02172	36.33	-36.33
0.02176	26.65	-26.65
0.0218	22.92	-22.92
0.02184	42.29	-42.29
0.02188	35.7	-35.7
0.02192	33.5	-33.5
0.02196	33.36	-33.36
0.022	52.03	-52.03
0.02204	22.63	-22.63
0.02208	22.14	-22.14
0.02212	35.32	-35.32
0.02216	17.43	-17.43
0.0222	40.18	-40.18
0.02224	51.39	-51.39
0.02228	20.99	-20.99
0.02232	40.06	-40.06
0.02236	35.58	-35.58
0.0224	43.3	-43.3
0.02244	34.77	-34.77
0.02248	23.85	-23.85
0.02252	36.88	-36.88
0.02256	47.58	-47.58
0.0226	25.64	-25.64
0.02264	37.89	-37.89
0.02268	48.67	-48.67
0.02272	25.99	-25.99
0.02276	28.96	-28.96
0.0228	27.2	-27.2
0.02284	41.19	-41.19
0.02288	30	-30
0.02292	23.99	-23.99
0.02296	30.03	-30.03
0.023	42.32	-42.32
0.02304	34.02	-34.02
0.02308	36.91	-36.91
0.02312	23.91	-23.91
0.02316	19.74	-19.74
0.0232	26.33	-26.33
0.02324	25	-25
0.02328	34.25	-34.25
0.02332	36.62	-36.62
0.02336	47.66	-47.66
0.0234	30.15	-30.15
0.02344	22.23	-22.23
0.02348	35.52	-35.52
0.02352	36.71	-36.71
0.02356	40.38	-40.38
0.0236	36.65	-36.65
0.02364	33.59	-33.59
0.02368	38.93	-38.93
0.02372	43.67	-43.67
0.02376	40.64	-40.64
0.0238	29.57	-29.57
0.02384	33.21	-33.21
0.02388	26.74	-26.74
0.02392	10.53	-10.53
0.02396	31.74	-31.74
0.024	36.54	-36.54
0.02404	45.32	-45.32
0.02408	57	-57
0.02412	38.93	-38.93
0.02416	28.59	-28.59
0.0242	37.43	-37.43
0.02424	36.42	-36.42
0.02428	39.69	-39.69
0.02432	36.8	-36.8
0.02436	33.79	-33.79
0.0244	36.51	-36.51
0.02444	23.39	-23.39
0.02448	19.57	-19.57
0.02452	25.9	-25.9
0.02456	36.19	-36.19
0.0246	32.4	-32.4
0.02464	28.24	-28.24
0.02468	25.76	-25.76
0.02472	18.79	-18.79
0.02476	64.14	-64.14
0.0248	90.12	-90.12
0.02484	51.16	-51.16
0.02488	86.68	-86.68
0.02492	74.43	-74.43
0.02496	89.43	-89.43
0.025	63.21	-63.21
0.02504	34.77	-34.77
0.02508	79.74	-79.74
0.02512	96.01	-96.01
0.02516	77.89	-77.89
0.0252	38.96	-38.96
0.02524	43.76	-43.76
0.02528	63.7	-63.7
0.02532	101.7	-101.7
0.02536	78.96	-78.96
0.0254	60.47	-60.47
0.02544	99.83	-99.83
0.02548	72.66	-72.66
0.02552	48.85	-48.85
0.02556	34.08	-34.08
0.0256	76.51	-76.51
0.02564	97.78	-97.78
0.02568	96.85	-96.85
0.02572	47.43	-47.43
0.02576	65.58	-65.58
0.0258	83.41	-83.41
0.02584	61.85	-61.85
0.02588	30.41	-30.41
0.02592	83.38	-83.38
0.02596	83.36	-83.36
0.026	98.82	-98.82
0.02604	56.77	-56.77
0.02608	21.62	-21.62
0.02612	63.56	-63.56
0.02616	74.11	-74.11
0.0262	66.62	-66.62
0.02624	55.5	-55.5
0.02628	74.71	-74.71
0.02632	70.12	-70.12
0.02636	64.8	-64.8
0.0264	82.14	-82.14
0.02644	74.28	-74.28
0.02648	4.716	-4.716
0.02652	62.6	-62.6
0.02656	63.04	-63.04
0.0266	87.08	-87.08
0.02664	30.73	-30.73
0.02668	30.15	-30.15
0.02672	93.15	-93.15
0.02676	62.14	-62.14
0.0268	82.17	-82.17
0.02684	61.28	-61.28
0.02688	47.81	-47.81
0.02692	43.21	-43.21
0.02696	27.63	-27.63
0.027	58.04	-58.04
0.02704	77.95	-77.95
0.02708	102.2	-102.2
0.02712	47.69	-47.69
0.02716	65.7	-65.7
0.0272	41.91	-41.91
0.02724	46.33	-46.33
0.02728	55.76	-55.76
0.02732	69.83	-69.83
0.02736	94.92	-94.92
0.0274	70.32	-70.32
0.02744	40.18	-40.18
0.02748	58.15	-58.15
0.02752	50.87	-50.87
0.02756	53.67	-53.67
0.0276	65.09	-65.09
0.02764	34.05	-34.05
0.02768	47.87	-47.87
0.02772	37.03	-37.03
0.02776	70.7	-70.7
0.0278	49.95	-49.95
0.02784	65.21	-65.21
0.02788	62.08	-62.08
0.02792	52.17	-52.17
0.02796	49.83	-49.83
0.028	56.97	-56.97
0.02804	54.98	-54.98
0.02808	37.49	-37.49
0.02812	54.77	-54.77
0.02816	57.37	-57.37
0.0282	49.72	-49.72
0.02824	9.774	-9.774
0.02828	29.83	-29.83
0.02832	36.59	-36.59
0.02836	42.78	-42.78
0.0284	80.29	-80.29
0.02844	58.13	-58.13
0.02848	32.84	-32.84
0.02852	38.13	-38.13
0.02856	54.69	-54.69
0.0286	22.61	-22.61
0.02864	38.65	-38.65
0.02868	49.11	-49.11
0.02872	42.61	-42.61
0.02876	55.06	-55.06
0.0288	29.6	-29.6
0.02884	29.6	-29.6
0.02888	24.66	-24.66
0.02892	44.43	-44.43
0.02896	33.91	-33.91
0.029	48.65	-48.65
0.02904	54.63	-54.63
0.02908	41.83	-41.83
0.02912	26.33	-26.33
0.02916	25.26	-25.26
0.0292	56.19	-56.19
0.02924	44.69	-44.69
0.02928	26.8	-26.8
0.02932	30.78	-30.78
0.02936	62.63	-62.63
0.0294	33.65	-33.65
0.02944	47.43	-47.43
0.02948	35.67	-35.67
0.02952	7.606	-7.606
0.02956	54.89	-54.89
0.0296	41.59	-41.59
0.02964	40.06	-40.06
0.02968	34.69	-34.69
0.02972	41.16	-41.16
0.02976	29.8	-29.8
0.0298	22.49	-22.49
0.02984	38.21	-38.21
0.02988	30.26	-30.26
0.02992	52.81	-52.81
0.02996	36.68	-36.68
0.03	37.26	-37.26
0.03004	54.05	-54.05
0.03008	33.91	-33.91
0.03012	43.7	-43.7
0.03016	46.16	-46.16
0.0302	22.58	-22.58
0.03024	19.54	-19.54
0.03028	34.6	-34.6
0.03032	12.2	-12.2
0.03036	33.44	-33.44
0.0304	41.19	-41.19
0.03044	22.61	-22.61
0.03048	37.52	-37.52
0.03052	36.13	-36.13
0.03056	17.4	-17.4
0.0306	37.95	-37.95
0.03064	21.13	-21.13
0.03068	41.16	-41.16
0.03072	19.14	-19.14
0.03076	17.03	-17.03
0.0308	38.07	-38.07
0.03084	21.36	-21.36
0.03088	45.35	-45.35
0.03092	21.65	-21.65
0.03096	15.67	-15.67
0.031	30.61	-30.61
0.03104	21.68	-21.68
0.03108	24.74	-24.74
0.03112	45.5	-45.5
0.03116	13.39	-13.39
0.0312	48.56	-48.56
0.03124	42.2	-42.2
0.03128	5.438	-5.438
0.03132	33.07	-33.07
0.03136	8.271	-8.271
0.0314	20.93	-20.93
0.03144	25.44	-25.44
0.03148	19.31	-19.31
0.03152	18.39	-18.39
0.03156	17.11	-17.11
0.0316	22.43	-22.43
0.03164	26.88	-26.88
0.03168	1.826	-1.826
0.03172	19.2	-19.2
0.03176	12.17	-12.17
0.0318	32.78	-32.78
0.03184	31.71	-31.71
0.03188	26.77	-26.77
0.03192	12.95	-12.95
0.03196	14.31	-14.31
0.032	18.68	-18.68
0.03204	13.16	-13.16
0.03208	11.33	-11.33
0.03212	21.1	-21.1
0.03216	41.71	-41.71
0.0322	29.63	-29.63
0.03224	26.28	-26.28
0.03228	24.77	-24.77
0.03232	13.94	-13.94
0.03236	20.44	-20.44
0.0324	17.87	-17.87
0.03244	26.88	-26.88
0.03248	14.28	-14.28
0.03252	17.69	-17.69
0.03256	30.84	-30.84
0.0326	10.41	-10.41
0.03264	22.26	-22.26
0.03268	11.25	-11.25
0.03272	16.8	-16.8
0.03276	31.02	-31.02
0.0328	9.398	-9.398
0.03284	37.09	-37.09
0.03288	26.74	-26.74
0.03292	8.097	-8.097
0.03296	29.17	-29.17
0.033	21.85	-21.85
0.03304	37.98	-37.98
0.03308	36.91	-36.91
0.03312	16.1	-16.1
0.03316	48.41	-48.41
0.0332	13.42	-13.42
0.03324	20.73	-20.73
0.03328	19.8	-19.8
0.03332	23.85	-23.85
0.03336	36.3	-36.3
0.0334	40.61	-40.61
0.03344	26.85	-26.85
0.03348	18.62	-18.62
0.03352	34.02	-34.02
0.03356	1.277	-1.277
0.0336	36.83	-36.83
0.03364	19.37	-19.37
0.03368	24.57	-24.57
0.03372	21.77	-21.77
0.03376	21.25	-21.25
0.0338	28.39	-28.39
0.03384	36.22	-36.22
0.03388	30.03	-30.03
0.03392	24.14	-24.14
0.03396	29.51	-29.51
0.034	43.53	-43.53
0.03404	31.8	-31.8
0.03408	14.51	-14.51
0.03412	31.85	-31.85
0.03416	38.33	-38.33
0.0342	20.7	-20.7
0.03424	23.47	-23.47
0.03428	34.89	-34.89
0.03432	21.62	-21.62
0.03436	33.39	-33.39
0.0344	18.91	-18.91
0.03444	18.47	-18.47
0.03448	19.63	-19.63
0.03452	21.91	-21.91
0.03456	33.3	-33.3
0.0346	36.39	-36.39
0.03464	18.82	-18.82
0.03468	36.07	-36.07
0.03472	11.13	-11.13
0.03476	27.66	-27.66
0.0348	23.59	-23.59
0.03484	16.05	-16.05
0.03488	1.652	-1.652
0.03492	-14.68	14.68
0.03496	26.45	-26.45
0.035	31.54	-31.54
0.03504	-21.3	21.3
0.03508	-39.21	39.21
0.03512	-24.82	24.82
0.03516	8.415	-8.415
0.0352	3.184	-3.184
0.03524	-21.3	21.3
0.03528	-26.38	26.38
0.03532	2.202	-2.202
0.03536	11.68	-11.68
0.0354	6.71	-6.71
0.03544	-30.02	30.02
0.03548	-14.04	14.04
0.03552	18.56	-18.56
0.03556	15.47	-15.47
0.0356	3.242	-3.242
0.03564	-2.018	2.018
0.03568	19.31	-19.31
0.03572	23.1	-23.1
0.03576	14.74	-14.74
0.0358	22.23	-22.23
0.03584	2.866	-2.866
0.03588	15.81	-15.81
0.03592	-5.891	5.891
0.03596	14.22	-14.22
0.036	-977.6m	0.9776
0.03604	27.23	-27.23
0.03608	9.253	-9.253
0.03612	-1.238	1.238
0.03616	-8.376	8.376
0.0362	8.762	-8.762
0.03624	16.05	-16.05
0.03628	-312.8m	0.3128
0.03632	33.59	-33.59
0.03636	-1.18	1.18
0.0364	23.68	-23.68
0.03644	-3.319	3.319
0.03648	19.34	-19.34
0.03652	10.06	-10.06
0.03656	13.07	-13.07
0.0366	22.75	-22.75
0.03664	7.115	-7.115
0.03668	18.18	-18.18
0.03672	26.8	-26.8
0.03676	1.797	-1.797
0.0368	18.36	-18.36
0.03684	5.073m	-0.005073
0.03688	17.03	-17.03
0.03692	3.993	-3.993
0.03696	18.3	-18.3
0.037	21.42	-21.42
0.03704	36.57	-36.57
0.03708	23.91	-23.91
0.03712	14.72	-14.72
0.03716	9.918	-9.918
0.0372	5.583	-5.583
0.03724	23.82	-23.82
0.03728	12.11	-12.11
0.03732	15.03	-15.03
0.03736	2.288	-2.288
0.0374	23.13	-23.13
0.03744	19.11	-19.11
0.03748	6.017	-6.017
0.03752	29.63	-29.63
0.03756	30.18	-30.18
0.0376	16.51	-16.51
0.03764	12.81	-12.81
0.03768	24.77	-24.77
0.03772	41.94	-41.94
0.03776	16.28	-16.28
0.0378	843.2m	-0.8432
0.03784	14.92	-14.92
0.03788	34.28	-34.28
0.03792	24.11	-24.11
0.03796	19.2	-19.2
0.038	7.23	-7.23
0.03804	21.13	-21.13
0.03808	36.83	-36.83
0.03812	21.57	-21.57
0.03816	26.54	-26.54
0.0382	20.5	-20.5
0.03824	12.11	-12.11
0.03828	22.92	-22.92
0.03832	20.12	-20.12
0.03836	15.87	-15.87
0.0384	32.49	-32.49
0.03844	28.68	-28.68
0.03848	32.95	-32.95
0.03852	17.03	-17.03
0.03856	11.74	-11.74
0.0386	24.86	-24.86
0.03864	26.1	-26.1
0.03868	23.07	-23.07
0.03872	19.14	-19.14
0.03876	35	-35
0.0388	38.59	-38.59
0.03884	27.75	-27.75
0.03888	31.45	-31.45
0.03892	43.93	-43.93
0.03896	31.07	-31.07
0.039	31.36	-31.36
0.03904	7.375	-7.375
0.03908	24.69	-24.69
0.03912	27.09	-27.09
0.03916	24.05	-24.05
0.0392	26.65	-26.65
0.03924	22.52	-22.52
0.03928	43.79	-43.79
0.03932	20.24	-20.24
0.03936	29.2	-29.2
0.0394	11.94	-11.94
0.03944	39.14	-39.14
0.03948	30.64	-30.64
0.03952	20.29	-20.29
0.03956	39.6	-39.6
0.0396	48.62	-48.62
0.03964	13.39	-13.39
0.03968	34.31	-34.31
0.03972	13.53	-13.53
0.03976	43.56	-43.56
0.0398	19.22	-19.22
0.03984	28.96	-28.96
0.03988	41.77	-41.77
0.03992	17.37	-17.37
0.03996	43.39	-43.39
0.04	26.71	-26.71
0.04004	21.91	-21.91
0.04008	27.58	-27.58
0.04012	29.11	-29.11
0.04016	43.36	-43.36
0.0402	19.28	-19.28
0.04024	45.38	-45.38
0.04028	25.99	-25.99
0.04032	24.95	-24.95
0.04036	42.61	-42.61
0.0404	37.03	-37.03
0.04044	21.05	-21.05
0.04048	28.47	-28.47
0.04052	46.97	-46.97
0.04056	43.39	-43.39
0.0406	20.32	-20.32
0.04064	44.8	-44.8
0.04068	44.46	-44.46
0.04072	15.93	-15.93
0.04076	14.92	-14.92
0.0408	27.26	-27.26
0.04084	48.36	-48.36
0.04088	27.4	-27.4
0.04092	43.82	-43.82
0.04096	26.39	-26.39
0.041	45.24	-45.24
0.04104	24.14	-24.14
0.04108	32.63	-32.63
0.04112	28.79	-28.79
0.04116	36.83	-36.83
0.0412	36.65	-36.65
0.04124	36.28	-36.28
0.04128	30.35	-30.35
0.04132	19.54	-19.54
0.04136	46.25	-46.25
0.0414	29.98	-29.98
0.04144	22.92	-22.92
0.04148	39.22	-39.22
0.04152	25.61	-25.61
0.04156	39.77	-39.77
0.0416	41.65	-41.65
0.04164	31.48	-31.48
0.04168	39.11	-39.11
0.04172	26.48	-26.48
0.04176	23.3	-23.3
0.0418	22.4	-22.4
0.04184	36.54	-36.54
0.04188	8.271	-8.271
0.04192	42.43	-42.43
0.04196	45.03	-45.03
0.042	33.96	-33.96
0.04204	19.6	-19.6
0.04208	38.21	-38.21
0.04212	29.28	-29.28
0.04216	20.32	-20.32
0.0422	48.85	-48.85
0.04224	27.03	-27.03
0.04228	26.25	-26.25
0.04232	50.52	-50.52
0.04236	28.85	-28.85
0.0424	33.24	-33.24
0.04244	39.22	-39.22
0.04248	25.09	-25.09
0.04252	30.9	-30.9
0.04256	33.82	-33.82
0.0426	41.88	-41.88
0.04264	38.33	-38.33
0.04268	25.41	-25.41
0.04272	21.02	-21.02
0.04276	25.9	-25.9
0.0428	27.17	-27.17
0.04284	64.69	-64.69
0.04288	26.85	-26.85
0.04292	27.81	-27.81
0.04296	32.75	-32.75
0.043	43.21	-43.21
0.04304	42.2	-42.2
0.04308	22.23	-22.23
0.04312	47.95	-47.95
0.04316	33.24	-33.24
0.0432	23.01	-23.01
0.04324	24.74	-24.74
0.04328	31.16	-31.16
0.04332	35.15	-35.15
0.04336	22.66	-22.66
0.0434	49.31	-49.31
0.04344	43.91	-43.91
0.04348	39.92	-39.92
0.04352	34.43	-34.43
0.04356	33.04	-33.04
0.0436	38.79	-38.79
0.04364	25.5	-25.5
0.04368	31.25	-31.25
0.04372	45.61	-45.61
0.04376	31.91	-31.91
0.0438	32.87	-32.87
0.04384	26.68	-26.68
0.04388	26.48	-26.48
0.04392	37.14	-37.14
0.04396	32.35	-32.35
0.044	29.43	-29.43
0.04404	25.9	-25.9
0.04408	35.41	-35.41
0.04412	42.26	-42.26
0.04416	41.07	-41.07
0.0442	33.15	-33.15
0.04424	40	-40
0.04428	52.89	-52.89
0.04432	31.62	-31.62
0.04436	33.15	-33.15
0.0444	49.54	-49.54
0.04444	46.94	-46.94
0.04448	28.39	-28.39
0.04452	28.24	-28.24
0.04456	25.12	-25.12
0.0446	18.91	-18.91
0.04464	28.7	-28.7
0.04468	30.7	-30.7
0.04472	33.94	-33.94
0.04476	35.32	-35.32
0.0448	75.29	-75.29
0.04484	54.8	-54.8
0.04488	71.42	-71.42
0.04492	85	-85
0.04496	79.45	-79.45
0.045	55.9	-55.9
0.04504	77.81	-77.81
0.04508	89.51	-89.51
0.04512	74.77	-74.77
0.04516	76.62	-76.62
0.0452	79.48	-79.48
0.04524	76.19	-76.19
0.04528	41.02	-41.02
0.04532	59.02	-59.02
0.04536	91.39	-91.39
0.0454	93.41	-93.41
0.04544	74.71	-74.71
0.04548	46.94	-46.94
0.04552	64.8	-64.8
0.04556	87.84	-87.84
0.0456	87.66	-87.66
0.04564	47.87	-47.87
0.04568	49.8	-49.8
0.04572	81.68	-81.68
0.04576	83.44	-83.44
0.0458	61.68	-61.68
0.04584	50.9	-50.9
0.04588	75	-75
0.04592	78.91	-78.91
0.04596	79.95	-79.95
0.046	75.78	-75.78
0.04604	29.95	-29.95
0.04608	45.38	-45.38
0.04612	55.58	-55.58
0.04616	73.1	-73.1
0.0462	53.21	-53.21
0.04624	59.25	-59.25
0.04628	97.95	-97.95
0.04632	82.14	-82.14
0.04636	35.78	-35.78
0.0464	44.54	-44.54
0.04644	80.38	-80.38
0.04648	90.38	-90.38
0.04652	71.16	-71.16
0.04656	60.84	-60.84
0.0466	39.63	-39.63
0.04664	75.84	-75.84
0.04668	47.29	-47.29
0.04672	60.7	-60.7
0.04676	85.84	-85.84
0.0468	69.77	-69.77
0.04684	55.41	-55.41
0.04688	20.93	-20.93
0.04692	45.29	-45.29
0.04696	50.7	-50.7
0.047	85.23	-85.23
0.04704	70.87	-70.87
0.04708	60.61	-60.61
0.04712	80.64	-80.64
0.04716	58.21	-58.21
0.0472	39.77	-39.77
0.04724	47.17	-47.17
0.04728	85.26	-85.26
0.04732	61.88	-61.88
0.04736	59.37	-59.37
0.0474	31.62	-31.62
0.04744	43.62	-43.62
0.04748	61.91	-61.91
0.04752	49.72	-49.72
0.04756	65.29	-65.29
0.0476	42.84	-42.84
0.04764	52.52	-52.52
0.04768	50.29	-50.29
0.04772	57.23	-57.23
0.04776	57.26	-57.26
0.0478	45.61	-45.61
0.04784	58.3	-58.3
0.04788	52.81	-52.81
0.04792	78.12	-78.12
0.04796	60.12	-60.12
0.048	55.9	-55.9
0.04804	53.33	-53.33
0.04808	59.34	-59.34
0.04812	48.82	-48.82
0.04816	25.96	-25.96
0.0482	49.77	-49.77
0.04824	39.72	-39.72
0.04828	39.46	-39.46
0.04832	17.98	-17.98
0.04836	57.03	-57.03
0.0484	37.09	-37.09
0.04844	73.85	-73.85
0.04848	44.74	-44.74
0.04852	37.78	-37.78
0.04856	53.39	-53.39
0.0486	28.21	-28.21
0.04864	37.78	-37.78
0.04868	32.14	-32.14
0.04872	44.74	-44.74
0.04876	44.98	-44.98
0.0488	33.44	-33.44
0.04884	33.21	-33.21
0.04888	52.84	-52.84
0.04892	13.96	-13.96
0.04896	37.14	-37.14
0.049	55.09	-55.09
0.04904	44.28	-44.28
0.04908	31.83	-31.83
0.04912	35.41	-35.41
0.04916	34.74	-34.74
0.0492	22.17	-22.17
0.04924	39.25	-39.25
0.04928	40.78	-40.78
0.04932	35.18	-35.18
0.04936	37.14	-37.14
0.0494	36.57	-36.57
0.04944	38.96	-38.96
0.04948	52.06	-52.06
0.04952	19.43	-19.43
0.04956	23.13	-23.13
0.0496	18.15	-18.15
0.04964	64.74	-64.74
0.04968	32.46	-32.46
0.04972	30.52	-30.52
0.04976	42.32	-42.32
0.0498	37.52	-37.52
0.04984	42.69	-42.69
0.04988	20.15	-20.15
0.04992	26.51	-26.51
0.04996	31.04	-31.04
0.05	57.58	-57.58
0.05004	41.36	-41.36
0.05008	35.32	-35.32
0.05012	33.76	-33.76
0.05016	45.18	-45.18
0.0502	34.8	-34.8
0.05024	41.02	-41.02
0.05028	13.99	-13.99
0.05032	38.18	-38.18
0.05036	31.62	-31.62
0.0504	40.15	-40.15
0.05044	23.27	-23.27
0.05048	29.22	-29.22
0.05052	30	-30
0.05056	12.66	-12.66
0.0506	51.74	-51.74
0.05064	29.83	-29.83
0.05068	37.75	-37.75
0.05072	4.86	-4.86
0.05076	26.05	-26.05
0.0508	17.61	-17.61
0.05084	28.39	-28.39
0.05088	22.58	-22.58
0.05092	12.37	-12.37
0.05096	29.98	-29.98
0.051	34.51	-34.51
0.05104	28.65	-28.65
0.05108	20.38	-20.38
0.05112	28.39	-28.39
0.05116	13.88	-13.88
0.0512	27.55	-27.55
0.05124	12.84	-12.84
0.05128	15.96	-15.96
0.05132	19.31	-19.31
0.05136	33.53	-33.53
0.0514	25.35	-25.35
0.05144	15.67	-15.67
0.05148	17.81	-17.81
0.05152	21.68	-21.68
0.05156	8.3	-8.3
0.0516	21.05	-21.05
0.05164	16.91	-16.91
0.05168	30.76	-30.76
0.05172	34.51	-34.51
0.05176	2.028	-2.028
0.0518	33.62	-33.62
0.05184	24.25	-24.25
0.05188	16.13	-16.13
0.05192	22.23	-22.23
0.05196	14.54	-14.54
0.052	26.51	-26.51
0.05204	11.97	-11.97
0.05208	41.85	-41.85
0.05212	22.43	-22.43
0.05216	34.48	-34.48
0.0522	16.85	-16.85
0.05224	21.91	-21.91
0.05228	16.65	-16.65
0.05232	12.58	-12.58
0.05236	3.907	-3.907
0.0524	17.43	-17.43
0.05244	30.73	-30.73
0.05248	28.3	-28.3
0.05252	35.44	-35.44
0.05256	18.73	-18.73
0.0526	37.32	-37.32
0.05264	40.7	-40.7
0.05268	14.37	-14.37
0.05272	13.7	-13.7
0.05276	32.49	-32.49
0.0528	34.8	-34.8
0.05284	24.63	-24.63
0.05288	36.71	-36.71
0.05292	31.68	-31.68
0.05296	25.06	-25.06
0.053	30.12	-30.12
0.05304	24.08	-24.08
0.05308	30.78	-30.78
0.05312	24.34	-24.34
0.05316	24.57	-24.57
0.0532	19.43	-19.43
0.05324	31.59	-31.59
0.05328	7.259	-7.259
0.05332	25.35	-25.35
0.05336	21.91	-21.91
0.0534	37.11	-37.11
0.05344	15.24	-15.24
0.05348	34.95	-34.95
0.05352	52.92	-52.92
0.05356	16.31	-16.31
0.0536	36.25	-36.25
0.05364	14.28	-14.28
0.05368	17.26	-17.26
0.05372	29.31	-29.31
0.05376	41.13	-41.13
0.0538	21.22	-21.22
0.05384	38.18	-38.18
0.05388	37.4	-37.4
0.05392	28.39	-28.39
0.05396	29.46	-29.46
0.054	19.14	-19.14
0.05404	21.1	-21.1
0.05408	15.44	-15.44
0.05412	24.22	-24.22
0.05416	23.56	-23.56
0.0542	29.4	-29.4
0.05424	23.7	-23.7
0.05428	28.82	-28.82
0.05432	25.93	-25.93
0.05436	24.08	-24.08
0.0544	46.02	-46.02
0.05444	19.72	-19.72
0.05448	24.66	-24.66
0.05452	31.42	-31.42
0.05456	12.87	-12.87
0.0546	32	-32
0.05464	30.21	-30.21
0.05468	20.58	-20.58
0.05472	32.26	-32.26
0.05476	7.924	-7.924
0.0548	13.44	-13.44
0.05484	23.36	-23.36
0.05488	34.02	-34.02
0.05492	31.19	-31.19
0.05496	-19.94	19.94
0.055	-38.87	38.87
0.05504	27.89	-27.89
0.05508	35.64	-35.64
0.05512	14.34	-14.34
0.05516	-24.5	24.5
0.0552	-18.12	18.12
0.05524	1.797	-1.797
0.05528	-3.81	3.81
0.05532	-19.59	19.59
0.05536	-29.24	29.24
0.0554	24.14	-24.14
0.05544	8.907	-8.907
0.05548	-22.08	22.08
0.05552	-34.18	34.18
0.05556	-15.72	15.72
0.0556	11.28	-11.28
0.05564	-31.58	31.58
0.05568	21.45	-21.45
0.05572	12.2	-12.2
0.05576	13.1	-13.1
0.0558	-804.2m	0.8042
0.05584	15.12	-15.12
0.05588	25.06	-25.06
0.05592	4.745	-4.745
0.05596	2.606	-2.606
0.056	9.08	-9.08
0.05604	16.31	-16.31
0.05608	-4.793	4.793
0.05612	-3.608	3.608
0.05616	54.43	-54.43
0.0562	6.797	-6.797
0.05624	11.22	-11.22
0.05628	612m	-0.612
0.05632	13.82	-13.82
0.05636	35.24	-35.24
0.0564	1.017	-1.017
0.05644	22.46	-22.46
0.05648	3.733	-3.733
0.05652	-2.423	2.423
0.05656	39.48	-39.48
0.0566	45.55	-45.55
0.05664	9.08	-9.08
0.05668	-5.255	5.255
0.05672	14.08	-14.08
0.05676	11.45	-11.45
0.0568	3.618	-3.618
0.05684	19.51	-19.51
0.05688	25.61	-25.61
0.05692	17.4	-17.4
0.05696	4.08	-4.08
0.057	25.47	-25.47
0.05704	25.55	-25.55
0.05708	13.68	-13.68
0.05712	17.84	-17.84
0.05716	-19.21	19.21
0.0572	16.59	-16.59
0.05724	14.63	-14.63
0.05728	31.85	-31.85
0.05732	30	-30
0.05736	23.47	-23.47
0.0574	17.29	-17.29
0.05744	1.103	-1.103
0.05748	28.04	-28.04
0.05752	-7.798	7.798
0.05756	11.1	-11.1
0.0576	17.81	-17.81
0.05764	15.03	-15.03
0.05768	17.09	-17.09
0.05772	7.259	-7.259
0.05776	7.606	-7.606
0.0578	17.29	-17.29
0.05784	20.47	-20.47
0.05788	35.21	-35.21
0.05792	23.18	-23.18
0.05796	18.3	-18.3
0.058	15	-15
0.05804	25.38	-25.38
0.05808	37.92	-37.92
0.05812	36.59	-36.59
0.05816	5.93	-5.93
0.0582	30.7	-30.7
0.05824	10.21	-10.21
0.05828	8.849	-8.849
0.05832	21.8	-21.8
0.05836	21.65	-21.65
0.0584	36.94	-36.94
0.05844	15.76	-15.76
0.05848	30.41	-30.41
0.05852	29.66	-29.66
0.05856	22.35	-22.35
0.0586	22.49	-22.49
0.05864	785.4m	-0.7854
0.05868	22.09	-22.09
0.05872	17.26	-17.26
0.05876	27.35	-27.35
0.0588	7.201	-7.201
0.05884	22.35	-22.35
0.05888	43.99	-43.99
0.05892	25.73	-25.73
0.05896	21.85	-21.85
0.059	19.11	-19.11
0.05904	32.92	-32.92
0.05908	32.89	-32.89
0.05912	21.54	-21.54
0.05916	11.88	-11.88
0.0592	27.03	-27.03
0.05924	35.21	-35.21
0.05928	24.77	-24.77
0.05932	23.27	-23.27
0.05936	25.09	-25.09
0.0594	54.86	-54.86
0.05944	26.94	-26.94
0.05948	10.35	-10.35
0.05952	32.23	-32.23
0.05956	34.05	-34.05
0.0596	36.94	-36.94
0.05964	40.96	-40.96
0.05968	30.87	-30.87
0.05972	36.28	-36.28
0.05976	28.15	-28.15
0.0598	38.99	-38.99
0.05984	14.48	-14.48
0.05988	31.88	-31.88
0.05992	32.92	-32.92
0.05996	26.57	-26.57
0.06	27.06	-27.06
0.06004	11.33	-11.33
0.06008	38.76	-38.76
0.06012	37.81	-37.81
0.06016	45.12	-45.12
0.0602	39.74	-39.74
0.06024	29.83	-29.83
0.06028	31.88	-31.88
0.06032	32.14	-32.14
0.06036	48.73	-48.73
0.0604	26.71	-26.71
0.06044	37	-37
0.06048	29.51	-29.51
0.06052	32.78	-32.78
0.06056	19.22	-19.22
0.0606	44.51	-44.51
0.06064	42.89	-42.89
0.06068	21.19	-21.19
0.06072	42.87	-42.87
0.06076	36.51	-36.51
0.0608	32	-32
0.06084	32.84	-32.84
0.06088	33.94	-33.94
0.06092	37.43	-37.43
0.06096	8.473	-8.473
0.061	25.47	-25.47
0.06104	35.76	-35.76
0.06108	45	-45
0.06112	29.95	-29.95
0.06116	42.03	-42.03
0.0612	32.32	-32.32
0.06124	51.97	-51.97
0.06128	44.43	-44.43
0.06132	29.28	-29.28
0.06136	18.99	-18.99
0.0614	23.1	-23.1
0.06144	40.41	-40.41
0.06148	38.79	-38.79
0.06152	33.3	-33.3
0.06156	28.5	-28.5
0.0616	33.3	-33.3
0.06164	36.85	-36.85
0.06168	18.47	-18.47
0.06172	27.52	-27.52
0.06176	15.06	-15.06
0.0618	32.26	-32.26
0.06184	33.18	-33.18
0.06188	37.98	-37.98
0.06192	20.09	-20.09
0.06196	32.89	-32.89
0.062	44.86	-44.86
0.06204	31.71	-31.71
0.06208	25.84	-25.84
0.06212	34.77	-34.77
0.06216	29.51	-29.51
0.0622	29.34	-29.34
0.06224	30.78	-30.78
0.06228	42.4	-42.4
0.06232	36.57	-36.57
0.06236	25.78	-25.78
0.0624	43.04	-43.04
0.06244	22.52	-22.52
0.06248	49.05	-49.05
0.06252	22.89	-22.89
0.06256	37.17	-37.17
0.0626	38.62	-38.62
0.06264	40.55	-40.55
0.06268	17.84	-17.84
0.06272	32.84	-32.84
0.06276	20.96	-20.96
0.0628	47.63	-47.63
0.06284	26.8	-26.8
0.06288	39.2	-39.2
0.06292	35.12	-35.12
0.06296	23.36	-23.36
0.063	27.58	-27.58
0.06304	24.51	-24.51
0.06308	45.52	-45.52
0.06312	46.88	-46.88
0.06316	24.98	-24.98
0.0632	29.8	-29.8
0.06324	22.03	-22.03
0.06328	31.1	-31.1
0.06332	28.21	-28.21
0.06336	29.28	-29.28
0.0634	33.62	-33.62
0.06344	32.43	-32.43
0.06348	42.84	-42.84
0.06352	25.24	-25.24
0.06356	53.76	-53.76
0.0636	34.83	-34.83
0.06364	33.13	-33.13
0.06368	28.62	-28.62
0.06372	42.43	-42.43
0.06376	47.17	-47.17
0.0638	43.73	-43.73
0.06384	34.25	-34.25
0.06388	35.99	-35.99
0.06392	31.31	-31.31
0.06396	16.59	-16.59
0.064	49.51	-49.51
0.06404	36.02	-36.02
0.06408	35.67	-35.67
0.06412	28.85	-28.85
0.06416	14.48	-14.48
0.0642	36.94	-36.94
0.06424	40.7	-40.7
0.06428	30.15	-30.15
0.06432	44.98	-44.98
0.06436	26.19	-26.19
0.0644	35.06	-35.06
0.06444	31.8	-31.8
0.06448	32.52	-32.52
0.06452	56.28	-56.28
0.06456	30.76	-30.76
0.0646	27.26	-27.26
0.06464	25.55	-25.55
0.06468	42.58	-42.58
0.06472	36.57	-36.57
0.06476	25.61	-25.61
0.0648	50.87	-50.87
0.06484	74.83	-74.83
0.06488	116.2	-116.2
0.06492	91.39	-91.39
0.06496	42.95	-42.95
0.065	47.78	-47.78
0.06504	77.6	-77.6
0.06508	110.6	-110.6
0.06512	68.3	-68.3
0.06516	42.26	-42.26
0.0652	62.6	-62.6
0.06524	94.83	-94.83
0.06528	98.44	-98.44
0.06532	59.43	-59.43
0.06536	60.15	-60.15
0.0654	55.87	-55.87
0.06544	70.81	-70.81
0.06548	77.98	-77.98
0.06552	103	-103
0.06556	48.62	-48.62
0.0656	40.55	-40.55
0.06564	50.7	-50.7
0.06568	100.1	-100.1
0.06572	106	-106
0.06576	64.97	-64.97
0.0658	53.21	-53.21
0.06584	12	-12
0.06588	67.89	-67.89
0.06592	79.89	-79.89
0.06596	107.4	-107.4
0.066	39.37	-39.37
0.06604	42.43	-42.43
0.06608	56.91	-56.91
0.06612	58.04	-58.04
0.06616	70.35	-70.35
0.0662	56.33	-56.33
0.06624	59.95	-59.95
0.06628	68.96	-68.96
0.06632	72.58	-72.58
0.06636	79.05	-79.05
0.0664	81.88	-81.88
0.06644	79.63	-79.63
0.06648	49.22	-49.22
0.06652	29.72	-29.72
0.06656	64.17	-64.17
0.0666	73.73	-73.73
0.06664	72.58	-72.58
0.06668	69.11	-69.11
0.06672	81.68	-81.68
0.06676	51.68	-51.68
0.0668	25.87	-25.87
0.06684	61.91	-61.91
0.06688	66.77	-66.77
0.06692	81.39	-81.39
0.06696	59.48	-59.48
0.067	41.88	-41.88
0.06704	55.93	-55.93
0.06708	60.03	-60.03
0.06712	75.32	-75.32
0.06716	55.24	-55.24
0.0672	30.81	-30.81
0.06724	65.03	-65.03
0.06728	49.31	-49.31
0.06732	72.03	-72.03
0.06736	89.14	-89.14
0.0674	66.74	-66.74
0.06744	66.02	-66.02
0.06748	70.38	-70.38
0.06752	62.58	-62.58
0.06756	52.78	-52.78
0.0676	84.86	-84.86
0.06764	64.51	-64.51
0.06768	58.3	-58.3
0.06772	47.87	-47.87
0.06776	50.96	-50.96
0.0678	63.91	-63.91
0.06784	14.8	-14.8
0.06788	63.21	-63.21
0.06792	52.69	-52.69
0.06796	71.19	-71.19
0.068	35.09	-35.09
0.06804	79.57	-79.57
0.06808	74.97	-74.97
0.06812	59.6	-59.6
0.06816	44.28	-44.28
0.0682	13.94	-13.94
0.06824	43.13	-43.13
0.06828	33.73	-33.73
0.06832	55.87	-55.87
0.06836	51.97	-51.97
0.0684	42.14	-42.14
0.06844	44.63	-44.63
0.06848	31.13	-31.13
0.06852	49.89	-49.89
0.06856	19.11	-19.11
0.0686	45.47	-45.47
0.06864	43.85	-43.85
0.06868	52.69	-52.69
0.06872	50.15	-50.15
0.06876	46.28	-46.28
0.0688	47.46	-47.46
0.06884	48.07	-48.07
0.06888	33.3	-33.3
0.06892	24.74	-24.74
0.06896	47.92	-47.92
0.069	46.85	-46.85
0.06904	57.32	-57.32
0.06908	36.13	-36.13
0.06912	19.08	-19.08
0.06916	35.15	-35.15
0.0692	38.76	-38.76
0.06924	40.64	-40.64
0.06928	30.24	-30.24
0.06932	35.55	-35.55
0.06936	55.84	-55.84
0.0694	31.04	-31.04
0.06944	42.46	-42.46
0.06948	33.47	-33.47
0.06952	33.85	-33.85
0.06956	21.85	-21.85
0.0696	73.33	-73.33
0.06964	29.86	-29.86
0.06968	25.06	-25.06
0.06972	43.13	-43.13
0.06976	41.16	-41.16
0.0698	40.18	-40.18
0.06984	33.53	-33.53
0.06988	38.93	-38.93
0.06992	19.4	-19.4
0.06996	39.89	-39.89
0.07	29.25	-29.25
0.07004	49.11	-49.11
0.07008	27.98	-27.98
0.07012	30.52	-30.52
0.07016	31.48	-31.48
0.0702	4.687	-4.687
0.07024	22.35	-22.35
0.07028	23.47	-23.47
0.07032	45.52	-45.52
0.07036	44.57	-44.57
0.0704	23.62	-23.62
0.07044	17.84	-17.84
0.07048	43.18	-43.18
0.07052	18.36	-18.36
0.07056	45.81	-45.81
0.0706	8.936	-8.936
0.07064	31.04	-31.04
0.07068	28.96	-28.96
0.07072	32.84	-32.84
0.07076	34.02	-34.02
0.0708	17.2	-17.2
0.07084	20.81	-20.81
0.07088	27.46	-27.46
0.07092	27.26	-27.26
0.07096	17.75	-17.75
0.071	31.77	-31.77
0.07104	29.74	-29.74
0.07108	33.67	-33.67
0.07112	24.57	-24.57
0.07116	18.59	-18.59
0.0712	25.84	-25.84
0.07124	15.41	-15.41
0.07128	39.69	-39.69
0.07132	34.98	-34.98
0.07136	28.18	-28.18
0.0714	33.18	-33.18
0.07144	36.94	-36.94
0.07148	11.1	-11.1
0.07152	42.37	-42.37
0.07156	33.73	-33.73
0.0716	-4.07	4.07
0.07164	10.09	-10.09
0.07168	23.62	-23.62
0.07172	11.74	-11.74
0.07176	34.25	-34.25
0.0718	17.75	-17.75
0.07184	15.38	-15.38
0.07188	178.5m	-0.1785
0.07192	34.6	-34.6
0.07196	31.28	-31.28
0.072	20.5	-20.5
0.07204	32.63	-32.63
0.07208	27.55	-27.55
0.07212	39.02	-39.02
0.07216	40.52	-40.52
0.0722	30.9	-30.9
0.07224	16.57	-16.57
0.07228	24.92	-24.92
0.07232	24.6	-24.6
0.07236	21.74	-21.74
0.0724	16.05	-16.05
0.07244	49.63	-49.63
0.07248	27.43	-27.43
0.07252	34.2	-34.2
0.07256	22.35	-22.35
0.0726	21.19	-21.19
0.07264	25.26	-25.26
0.07268	15.44	-15.44
0.07272	26.54	-26.54
0.07276	9.369	-9.369
0.0728	37.29	-37.29
0.07284	37.09	-37.09
0.07288	38.44	-38.44
0.07292	25.67	-25.67
0.07296	28.13	-28.13
0.073	38.13	-38.13
0.07304	11.71	-11.71
0.07308	22.14	-22.14
0.07312	20.87	-20.87
0.07316	20	-20
0.0732	27.43	-27.43
0.07324	24.05	-24.05
0.07328	30.35	-30.35
0.07332	26.68	-26.68
0.07336	37.98	-37.98
0.0734	25.93	-25.93
0.07344	39.25	-39.25
0.07348	33.76	-33.76
0.07352	24.77	-24.77
0.07356	22.55	-22.55
0.0736	37.98	-37.98
0.07364	22.69	-22.69
0.07368	15.76	-15.76
0.07372	35.15	-35.15
0.07376	41.8	-41.8
0.0738	5.756	-5.756
0.07384	40.06	-40.06
0.07388	28.3	-28.3
0.07392	49.66	-49.66
0.07396	16.22	-16.22
0.074	40.64	-40.64
0.07404	30.58	-30.58
0.07408	25.24	-25.24
0.07412	21.74	-21.74
0.07416	16.25	-16.25
0.0742	20.93	-20.93
0.07424	33.33	-33.33
0.07428	28.44	-28.44
0.07432	13.5	-13.5
0.07436	23.04	-23.04
0.0744	22.2	-22.2
0.07444	24.8	-24.8
0.07448	23.15	-23.15
0.07452	33.88	-33.88
0.07456	39.05	-39.05
0.0746	33.24	-33.24
0.07464	30.12	-30.12
0.07468	25.58	-25.58
0.07472	15.9	-15.9
0.07476	22.09	-22.09
0.0748	18.73	-18.73
0.07484	25.81	-25.81
0.07488	6.739	-6.739
0.07492	-22.77	22.77
0.07496	38.1	-38.1
0.075	13.53	-13.53
0.07504	-21.35	21.35
0.07508	-45.05	45.05
0.07512	-13.69	13.69
0.07516	34.74	-34.74
0.0752	6.537	-6.537
0.07524	-14.76	14.76
0.07528	-48.72	48.72
0.07532	-15.51	15.51
0.07536	18.62	-18.62
0.0754	-10.02	10.02
0.07544	265.2m	-0.2652
0.07548	-26.84	26.84
0.07552	16.1	-16.1
0.07556	-18.46	18.46
0.0756	-42.57	42.57
0.07564	-9.648	9.648
0.07568	5.699	-5.699
0.07572	22.17	-22.17
0.07576	-29.1	29.1
0.0758	-26.12	26.12
0.07584	-21.76	21.76
0.07588	30.93	-30.93
0.07592	14.54	-14.54
0.07596	-3.81	3.81
0.076	1.017	-1.017
0.07604	23.13	-23.13
0.07608	30.96	-30.96
0.07612	1.855	-1.855
0.07616	-8.607	8.607
0.0762	16.22	-16.22
0.07624	12.87	-12.87
0.07628	16.48	-16.48
0.07632	12.46	-12.46
0.07636	-4.475	4.475
0.0764	-2.163	2.163
0.07644	24.4	-24.4
0.07648	22.52	-22.52
0.07652	-2.336	2.336
0.07656	-20.57	20.57
0.0766	9.369	-9.369
0.07664	47.63	-47.63
0.07668	22.17	-22.17
0.07672	-3.492	3.492
0.07676	-13.32	13.32
0.0768	15.58	-15.58
0.07684	8.618	-8.618
0.07688	6.623	-6.623
0.07692	7.028	-7.028
0.07696	27.95	-27.95
0.077	14.34	-14.34
0.07704	37.75	-37.75
0.07708	22.29	-22.29
0.07712	11.94	-11.94
0.07716	3.618	-3.618
0.0772	10.44	-10.44
0.07724	28.39	-28.39
0.07728	27.26	-27.26
0.07732	-4.417	4.417
0.07736	21.88	-21.88
0.0774	34.46	-34.46
0.07744	17.26	-17.26
0.07748	24.28	-24.28
0.07752	4.745	-4.745
0.07756	28.15	-28.15
0.0776	27.89	-27.89
0.07764	-2.018	2.018
0.07768	17.61	-17.61
0.07772	12.81	-12.81
0.07776	28.41	-28.41
0.0778	10.09	-10.09
0.07784	28.82	-28.82
0.07788	17.37	-17.37
0.07792	4.889	-4.889
0.07796	43.41	-43.41
0.078	25.7	-25.7
0.07804	22.84	-22.84
0.07808	8.155	-8.155
0.07812	18.39	-18.39
0.07816	25.93	-25.93
0.0782	19.54	-19.54
0.07824	5.178	-5.178
0.07828	28.01	-28.01
0.07832	47.4	-47.4
0.07836	24.02	-24.02
0.0784	37	-37
0.07844	8.473	-8.473
0.07848	25.03	-25.03
0.07852	24.77	-24.77
0.07856	-659.7m	0.6597
0.0786	14.86	-14.86
0.07864	22.09	-22.09
0.07868	25.21	-25.21
0.07872	18.94	-18.94
0.07876	35.21	-35.21
0.0788	28.44	-28.44
0.07884	25.9	-25.9
0.07888	25.96	-25.96
0.07892	20.52	-20.52
0.07896	16.25	-16.25
0.079	9.803	-9.803
0.07904	38.76	-38.76
0.07908	25.78	-25.78
0.07912	46.02	-46.02
0.07916	29.37	-29.37
0.0792	34.37	-34.37
0.07924	42.4	-42.4
0.07928	20.47	-20.47
0.07932	30.38	-30.38
0.07936	16.59	-16.59
0.0794	50.18	-50.18
0.07944	37.72	-37.72
0.07948	50.99	-50.99
0.07952	38.67	-38.67
0.07956	30.47	-30.47
0.0796	26.22	-26.22
0.07964	12.69	-12.69
0.07968	48.13	-48.13
0.07972	26.19	-26.19
0.07976	23.27	-23.27
0.0798	16.42	-16.42
0.07984	29.54	-29.54
0.07988	16.51	-16.51
0.07992	19.11	-19.11
[truncated: 98,001 more rows]

## Sheet: Sheet1
		100	2500
time	data	butfilt1	Stress
0.549	981.8	1474.34	0.589735
0.54904	3328	1478.48	0.591393
0.54908	4400	1482.46	0.592983
0.54912	5594	1486.26	0.594503
0.54916	7416	1489.87	0.595949
0.5492	7815	1493.3	0.597321
0.54924	8480	1496.54	0.598617
0.54928	8047	1499.59	0.599836
0.54932	7156	1502.45	0.600981
0.54936	7126	1505.13	0.602053
0.5494	5367	1507.64	0.603055
0.54944	4666	1509.98	0.603991
0.54948	4503	1512.16	0.604866
0.54952	2512	1514.21	0.605684
0.54956	1797	1516.13	0.606451
0.5496	1316	1517.93	0.607172
0.54964	274.8	1519.64	0.607854
0.54968	521	1521.25	0.608502
0.54972	643.3	1522.8	0.609121
0.54976	516.7	1524.29	0.609717
0.5498	923.2	1525.74	0.610295
0.54984	923.2	1527.15	0.61086
0.54988	835.1	1528.54	0.611417
0.54992	623	1529.93	0.61197
0.54996	185.3	1531.31	0.612526
0.55	42.28	1532.72	0.613087
0.55004	210.9	1534.15	0.613659
0.55008	394.8	1535.61	0.614245
0.55012	121.3	1537.13	0.61485
0.55016	362.9	1538.69	0.615478
0.5502	413.9	1540.33	0.616131
0.55024	-796.8	1542.03	0.616813
0.55028	-794.9	1543.82	0.617528
0.55032	-254.3	1545.69	0.618278
0.55036	-628.5	1547.66	0.619065
0.5504	-225.1	1549.73	0.619892
0.55044	561.8	1551.9	0.62076
0.55048	588.8	1554.18	0.621672
0.55052	495.3	1556.57	0.622627
0.55056	533.8	1559.07	0.623628
0.5506	369.8	1561.69	0.624676
0.55064	488.7	1564.43	0.62577
0.55068	628.1	1567.28	0.626913
0.55072	758.3	1570.26	0.628105
0.55076	900.2	1573.36	0.629345
0.5508	643.1	1576.58	0.630634
0.55084	350.9	1579.93	0.631972
0.55088	260.4	1583.4	0.63336
0.55092	-91.36	1586.99	0.634796
0.55096	-294.7	1590.7	0.63628
0.551	45.89	1594.53	0.637812
0.55104	539.4	1598.48	0.639391
0.55108	1186	1602.54	0.641015
0.55112	1889	1606.71	0.642683
0.55116	2507	1610.98	0.644393
0.5512	3054	1615.36	0.646145
0.55124	3122	1619.84	0.647936
0.55128	3080	1624.41	0.649766
0.55132	3185	1629.08	0.651634
0.55136	2622	1633.85	0.653539
0.5514	2322	1638.7	0.655481
0.55144	1965	1643.65	0.657459
0.55148	1354	1648.69	0.659474
0.55152	1206	1653.81	0.661525
0.55156	955.4	1659.03	0.663613
0.5516	838.8	1664.34	0.665737
0.55164	1021	1669.74	0.667896
0.55168	1178	1675.23	0.670091
0.55172	1784	1680.8	0.67232
0.55176	2238	1686.46	0.674584
0.5518	2822	1692.2	0.676882
0.55184	3765	1698.03	0.679213
0.55188	4342	1703.94	0.681577
0.55192	4823	1709.93	0.683974
0.55196	5190	1716.01	0.686405
0.552	5228	1722.17	0.68887
0.55204	4814	1728.43	0.691371
0.55208	4223	1734.78	0.693911
0.55212	3545	1741.23	0.696491
0.55216	2509	1747.79	0.699114
0.5522	1543	1754.46	0.701784
0.55224	735.2	1761.26	0.704504
0.55228	-113.2	1768.19	0.707277
0.55232	-614	1775.27	0.710106
0.55236	-767.8	1782.49	0.712994
0.5524	-1052	1789.86	0.715944
0.55244	-900.7	1797.39	0.718957
0.55248	-234.3	1805.09	0.722035
0.55252	444.3	1812.95	0.72518
0.55256	1088	1820.98	0.728392
0.5526	1619	1829.18	0.731672
0.55264	1823	1837.55	0.73502
0.55268	1714	1846.09	0.738437
0.55272	1268	1854.81	0.741924
0.55276	836.8	1863.7	0.74548
0.5528	359.2	1872.77	0.749107
0.55284	-68.91	1882.01	0.752804
0.55288	415.4	1891.43	0.756572
0.55292	1039	1901.02	0.760409
0.55296	1302	1910.79	0.764316
0.553	2281	1920.73	0.768292
0.55304	3095	1930.84	0.772335
0.55308	3543	1941.12	0.776446
0.55312	3936	1951.56	0.780624
0.55316	3693	1962.17	0.784868
0.5532	3745	1972.95	0.789178
0.55324	4117	1983.89	0.793556
0.55328	3558	1995	0.798
0.55332	3184	2006.28	0.802513
0.55336	3117	2017.74	0.807094
0.5534	2880	2029.37	0.811747
0.55344	2386	2041.18	0.816471
0.55348	1545	2053.17	0.82127
0.55352	1344	2065.36	0.826143
0.55356	1122	2077.73	0.831093
0.5536	631.5	2090.3	0.836122
0.55364	691.2	2103.08	0.84123
0.55368	843.6	2116.05	0.846419
0.55372	935.9	2129.23	0.85169
0.55376	1117	2142.61	0.857043
0.5538	1594	2156.2	0.862479
0.55384	1925	2170	0.867999
0.55388	2043	2184	0.873601
0.55392	2349	2198.22	0.879288
0.55396	2639	2212.65	0.885059
0.554	2638	2227.28	0.890913
0.55404	2706	2242.13	0.896852
0.55408	2931	2257.19	0.902876
0.55412	2953	2272.46	0.908986
0.55416	2884	2287.95	0.91518
0.5542	2761	2303.65	0.921462
0.55424	2555	2319.57	0.92783
0.55428	2213	2335.72	0.934286
0.55432	1939	2352.08	0.940831
0.55436	1883	2368.66	0.947465
0.5544	1593	2385.47	0.95419
0.55444	1379	2402.51	0.961005
0.55448	1315	2419.78	0.967911
0.55452	1192	2437.27	0.97491
0.55456	1064	2455	0.982
0.5546	1218	2472.96	0.989182
0.55464	1572	2491.14	0.996456
0.55468	1961	2509.55	1.00382
0.55472	2340	2528.19	1.01128
0.55476	2904	2547.06	1.01882
0.5548	3337	2566.15	1.02646
0.55484	3563	2585.46	1.03418
0.55488	3818	2604.99	1.042
0.55492	3945	2624.75	1.0499
0.55496	3968	2644.72	1.05789
0.555	3926	2664.91	1.06597
0.55504	3823	2685.33	1.07413
0.55508	3526	2705.97	1.08239
0.55512	3263	2726.82	1.09073
0.55516	3047	2747.91	1.09916
0.5552	2716	2769.22	1.10769
0.55524	2378	2790.77	1.11631
0.55528	2142	2812.54	1.12502
0.55532	1945	2834.55	1.13382
0.55536	1739	2856.79	1.14272
0.5554	1563	2879.27	1.15171
0.55544	1460	2902	1.1608
0.55548	1453	2924.95	1.16998
0.55552	1517	2948.15	1.17926
0.55556	1677	2971.59	1.18863
0.5556	1839	2995.26	1.1981
0.55564	2201	3019.17	1.20767
0.55568	2593	3043.31	1.21732
0.55572	2982	3067.68	1.22707
0.55576	3345	3092.28	1.23691
0.5558	3658	3117.1	1.24684
0.55584	3892	3142.15	1.25686
0.55588	4016	3167.42	1.26697
0.55592	4085	3192.9	1.27716
0.55596	3974	3218.61	1.28744
0.556	3774	3244.52	1.29781
0.55604	3588	3270.66	1.30826
0.55608	3278	3297	1.3188
0.55612	3028	3323.56	1.32942
0.55616	2832	3350.32	1.34013
0.5562	2680	3377.3	1.35092
0.55624	2532	3404.49	1.36179
0.55628	2379	3431.88	1.37275
0.55632	2266	3459.48	1.38379
0.55636	2252	3487.28	1.39491
0.5564	2340	3515.29	1.40612
0.55644	2452	3543.49	1.4174
0.55648	2693	3571.89	1.42876
0.55652	2959	3600.48	1.44019
0.55656	3179	3629.25	1.4517
0.5566	3419	3658.2	1.46328
0.55664	3721	3687.33	1.47493
0.55668	4033	3716.64	1.48665
0.55672	4329	3746.11	1.49844
0.55676	4577	3775.74	1.5103
0.5568	4727	3805.53	1.52221
0.55684	4789	3835.47	1.53419
0.55688	4876	3865.56	1.54622
0.55692	4840	3895.8	1.55832
0.55696	4571	3926.18	1.57047
0.557	4272	3956.7	1.58268
0.55704	4022	3987.36	1.59494
0.55708	3710	4018.15	1.60726
0.55712	3454	4049.08	1.61963
0.55716	3254	4080.14	1.63206
0.5572	3035	4111.32	1.64453
0.55724	2899	4142.63	1.65705
0.55728	2874	4174.07	1.66963
0.55732	2917	4205.61	1.68225
0.55736	3003	4237.27	1.69491
0.5574	3219	4269.04	1.70762
0.55744	3401	4300.92	1.72037
0.55748	3657	4332.88	1.73315
0.55752	3933	4364.94	1.74598
0.55756	4226	4397.09	1.75883
0.5576	4473	4429.31	1.77172
0.55764	4726	4461.6	1.78464
0.55768	4909	4493.95	1.79758
0.55772	5030	4526.36	1.81055
0.55776	5037	4558.83	1.82353
0.5578	4966	4591.33	1.83653
0.55784	4828	4623.88	1.84955
0.55788	4591	4656.46	1.86258
0.55792	4364	4689.07	1.87563
0.55796	4044	4721.7	1.88868
0.558	3752	4754.34	1.90173
0.55804	3535	4786.99	1.9148
0.55808	3423	4819.64	1.92786
0.55812	3415	4852.29	1.94092
0.55816	3525	4884.92	1.95397
0.5582	3780	4917.54	1.96701
0.55824	4063	4950.12	1.98005
0.55828	4383	4982.66	1.99307
0.55832	4762	5015.16	2.00606
0.55836	5106	5047.59	2.01904
0.5584	5467	5079.96	2.03198
0.55844	5742	5112.25	2.0449
0.55848	6002	5144.45	2.05778
0.55852	6196	5176.55	2.07062
0.55856	6358	5208.55	2.08342
0.5586	6403	5240.43	2.09617
0.55864	6317	5272.19	2.10888
0.55868	6173	5303.81	2.12153
0.55872	5966	5335.3	2.13412
0.55876	5699	5366.64	2.14665
0.5588	5435	5397.82	2.15913
0.55884	5152	5428.85	2.17154
0.55888	4831	5459.71	2.18388
0.55892	4561	5490.39	2.19616
0.55896	4351	5520.89	2.20836
0.559	4166	5551.21	2.22048
0.55904	4028	5581.32	2.23253
0.55908	4035	5611.24	2.24449
0.55912	4118	5640.94	2.25637
0.55916	4264	5670.41	2.26816
0.5592	4506	5699.65	2.27986
0.55924	4760	5728.65	2.29146
0.55928	5003	5757.39	2.30295
0.55932	5264	5785.86	2.31434
0.55936	5475	5814.05	2.32562
0.5594	5665	5841.95	2.33678
0.55944	5793	5869.55	2.34782
0.55948	5963	5896.82	2.35873
0.55952	6084	5923.77	2.36951
0.55956	6148	5950.38	2.38015
0.5596	6199	5976.63	2.39065
0.55964	6244	6002.52	2.40101
0.55968	6296	6028.02	2.41121
0.55972	6358	6053.14	2.42126
0.55976	6423	6077.85	2.43114
0.5598	6482	6102.15	2.44086
0.55984	6487	6126.02	2.45041
0.55988	6476	6149.46	2.45978
0.55992	6411	6172.44	2.46898
0.55996	6357	6194.96	2.47799
0.56	6340	6217.01	2.48681
0.56004	6324	6238.58	2.49543
0.56008	6367	6259.65	2.50386
0.56012	6419	6280.22	2.51209
0.56016	6596	6300.27	2.52011
0.5602	6672	6319.79	2.52791
0.56024	6809	6338.77	2.53551
0.56028	6866	6357.2	2.54288
0.56032	6917	6375.08	2.55003
0.56036	6919	6392.38	2.55695
0.5604	6926	6409.1	2.56364
0.56044	6889	6425.23	2.57009
0.56048	6866	6440.76	2.57631
0.56052	6833	6455.69	2.58227
0.56056	6762	6469.99	2.588
0.5606	6744	6483.66	2.59347
0.56064	6739	6496.7	2.59868
0.56068	6723	6509.09	2.60364
0.56072	6711	6520.83	2.60833
0.56076	6720	6531.9	2.61276
0.5608	6729	6542.3	2.61692
0.56084	6726	6552.01	2.6208
0.56088	6733	6561.04	2.62442
0.56092	6762	6569.37	2.62775
0.56096	6837	6576.99	2.63079
0.561	6930	6583.89	2.63356
0.56104	7080	6590.07	2.63603
0.56108	7262	6595.52	2.63821
0.56112	7405	6600.23	2.64009
0.56116	7571	6604.2	2.64168
0.5612	7785	6607.4	2.64296
0.56124	7965	6609.85	2.64394
0.56128	8130	6611.53	2.64461
0.56132	8186	6612.43	2.64497
0.56136	8192	6612.56	2.64502
0.5614	8064	6611.9	2.64476
0.56144	7896	6610.45	2.64418
0.56148	7724	6608.21	2.64328
0.56152	7487	6605.17	2.64207
0.56156	7340	6601.34	2.64054
0.5616	7232	6596.71	2.63868
0.56164	7144	6591.28	2.63651
0.56168	7127	6585.04	2.63402
0.56172	7152	6578	2.6312
0.56176	7176	6570.15	2.62806
0.5618	7219	6561.5	2.6246
0.56184	7268	6552.04	2.62082
0.56188	7347	6541.77	2.61671
0.56192	7442	6530.69	2.61228
0.56196	7544	6518.81	2.60752
0.562	7595	6506.11	2.60245
0.56204	7642	6492.61	2.59705
0.56208	7659	6478.31	2.59132
0.56212	7662	6463.2	2.58528
0.56216	7663	6447.29	2.57892
0.5622	7653	6430.58	2.57223
0.56224	7594	6413.08	2.56523
0.56228	7556	6394.78	2.55791
0.56232	7455	6375.7	2.55028
0.56236	7352	6355.83	2.54233
0.5624	7233	6335.19	2.53408
0.56244	7144	6313.78	2.52551
0.56248	7040	6291.59	2.51664
0.56252	6961	6268.65	2.50746
0.56256	6960	6244.95	2.49798
0.5626	6968	6220.51	2.4882
0.56264	7007	6195.33	2.47813
0.56268	7064	6169.41	2.46776
0.56272	7135	6142.77	2.45711
0.56276	7188	6115.41	2.44616
0.5628	7256	6087.34	2.43494
0.56284	7222	6058.58	2.42343
0.56288	7191	6029.12	2.41165
0.56292	7115	5998.98	2.39959
0.56296	6976	5968.17	2.38727
0.563	6867	5936.7	2.37468
0.56304	6779	5904.58	2.36183
0.56308	6698	5871.83	2.34873
0.56312	6613	5838.45	2.33538
0.56316	6590	5804.45	2.32178
0.5632	6537	5769.86	2.30794
0.56324	6476	5734.67	2.29387
0.56328	6385	5698.91	2.27957
0.56332	6289	5662.59	2.26504
0.56336	6200	5625.72	2.25029
0.5634	6094	5588.32	2.23533
0.56344	5986	5550.39	2.22016
0.56348	5846	5511.96	2.20478
0.56352	5720	5473.04	2.18922
0.56356	5641	5433.64	2.17346
0.5636	5554	5393.78	2.15751
0.56364	5567	5353.46	2.14139
0.56368	5569	5312.72	2.12509
0.56372	5583	5271.56	2.10862
0.56376	5595	5230	2.092
0.5638	5592	5188.04	2.07522
0.56384	5562	5145.72	2.05829
0.56388	5514	5103.04	2.04122
0.56392	5432	5060.02	2.02401
0.56396	5354	5016.67	2.00667
0.564	5263	4973.01	1.9892
0.56404	5160	4929.06	1.97162
0.56408	5065	4884.83	1.95393
0.56412	4951	4840.34	1.93614
0.56416	4883	4795.61	1.91824
0.5642	4775	4750.65	1.90026
0.56424	4686	4705.47	1.88219
0.56428	4577	4660.1	1.86404
0.56432	4472	4614.55	1.84582
0.56436	4322	4568.84	1.82754
0.5644	4172	4522.99	1.80919
0.56444	4048	4477	1.7908
0.56448	3906	4430.9	1.77236
0.56452	3821	4384.7	1.75388
0.56456	3768	4338.42	1.73537
0.5646	3727	4292.07	1.71683
0.56464	3756	4245.67	1.69827
0.56468	3765	4199.23	1.67969
0.56472	3794	4152.77	1.66111
0.56476	3787	4106.31	1.64252
0.5648	3773	4059.85	1.62394
0.56484	3722	4013.41	1.60537
0.56488	3675	3967.02	1.58681
0.56492	3598	3920.67	1.56827
0.56496	3515	3874.38	1.54975
0.565	3417	3828.18	1.53127
0.56504	3285	3782.06	1.51283
0.56508	3130	3736.06	1.49442
0.56512	2983	3690.17	1.47607
0.56516	2996	3644.41	1.45777
0.5652	2850	3598.8	1.43952
0.56524	2699	3553.35	1.42134
0.56528	2605	3508.07	1.40323
0.56532	2564	3462.97	1.38519
0.56536	2464	3418.07	1.36723
0.5654	2322	3373.37	1.34935
0.56544	2257	3328.88	1.33155
0.56548	2202	3284.63	1.31385
0.56552	2186	3240.61	1.29624
0.56556	2231	3196.83	1.27873
0.5656	2215	3153.32	1.26133
0.56564	2221	3110.06	1.24402
0.56568	2231	3067.08	1.22683
0.56572	2276	3024.38	1.20975
0.56576	2280	2981.97	1.19279
0.5658	2269	2939.85	1.17594
0.56584	2191	2898.04	1.15922
0.56588	2153	2856.54	1.14262
0.56592	2070	2815.36	1.12614
0.56596	1936	2774.5	1.1098
0.566	1845	2733.96	1.09359
0.56604	1774	2693.77	1.07751
0.56608	1775	2653.91	1.06156
0.56612	1822	2614.4	1.04576
0.56616	1825	2575.24	1.0301
0.5662	1864	2536.43	1.01457
0.56624	1839	2497.98	0.999194
0.56628	1829	2459.9	0.983959
0.56632	1838	2422.18	0.968871
0.56636	1894	2384.83	0.95393
0.5664	2007	2347.85	0.939138
0.56644	2019	2311.24	0.924497
0.56648	2048	2275.01	0.910006
0.56652	2032	2239.17	0.895667
0.56656	2023	2203.7	0.881481
0.5666	2067	2168.62	0.867449
0.56664	2074	2133.93	0.853572
0.56668	2035	2099.63	0.839851
0.56672	2020	2065.72	0.826286
0.56676	2001	2032.2	0.812879
0.5668	1931	1999.08	0.799631
0.56684	1857	1966.35	0.786542
0.56688	1754	1934.03	0.773613
0.56692	1568	1902.11	0.760845
0.56696	1350	1870.6	0.74824
0.567	1194	1839.49	0.735796
0.56704	1120	1808.79	0.723517
0.56708	1074	1778.5	0.711401
0.56712	1042	1748.62	0.699449
0.56716	1028	1719.16	0.687662
0.5672	1073	1690.1	0.67604
0.56724	1094	1661.46	0.664584
0.56728	1126	1633.23	0.653292
0.56732	1104	1605.41	0.642166
0.56736	1042	1578.01	0.631204
0.5674	980	1551.02	0.620407
0.56744	897.5	1524.44	0.609775
0.56748	805.7	1498.27	0.599307
0.56752	780.3	1472.51	0.589002
0.56756	726.9	1447.15	0.57886
0.5676	713.3	1422.2	0.568881
0.56764	694	1397.66	0.559063
0.56768	669.1	1373.51	0.549405
0.56772	695.4	1349.77	0.539907
0.56776	729.1	1326.42	0.530568
0.5678	783.7	1303.46	0.521385
0.56784	774.1	1280.89	0.512358
0.56788	825.6	1258.71	0.503485
0.56792	797.8	1236.91	0.494764
0.56796	866.7	1215.49	0.486195
0.568	910.2	1194.44	0.477775
0.56804	986.7	1173.76	0.469503
0.56808	1088	1153.44	0.461377
0.56812	1173	1133.49	0.453395
0.56816	1283	1113.89	0.445556
0.5682	1357	1094.64	0.437857
0.56824	1424	1075.74	0.430296
0.56828	1475	1057.18	0.422873
0.56832	1481	1038.96	0.415585
0.56836	1446	1021.08	0.408431
0.5684	1378	1003.52	0.401409
0.56844	1311	986.296	0.394518
0.56848	1196	969.392	0.387757
0.56852	1072	952.808	0.381123
0.56856	943.9	936.54	0.374616
0.5686	880.8	920.586	0.368234
0.56864	821.7	904.942	0.361977
0.56868	774	889.604	0.355842
0.56872	717	874.57	0.349828
0.56876	683.3	859.836	0.343934
0.5688	641.6	845.399	0.338159
0.56884	579.1	831.254	0.332502
0.56888	521	817.4	0.32696
0.56892	450.8	803.831	0.321532
0.56896	420.9	790.544	0.316218
0.569	386.3	777.536	0.311014
0.56904	388.3	764.801	0.305921
0.56908	394.5	752.337	0.300935
0.56912	489.5	740.138	0.296055
0.56916	548.4	728.199	0.29128
0.5692	589.5	716.517	0.286607
0.56924	629	705.087	0.282035
0.56928	657.5	693.904	0.277561
0.56932	717.6	682.962	0.273185
0.56936	749.3	672.258	0.268903
0.5694	736.7	661.787	0.264715
0.56944	720.1	651.543	0.260617
0.56948	691.7	641.523	0.256609
0.56952	688.2	631.72	0.252688
0.56956	717.5	622.132	0.248853
0.5696	764.8	612.752	0.245101
0.56964	841.7	603.577	0.241431
0.56968	895.5	594.602	0.237841
0.56972	958	585.823	0.234329
0.56976	995.9	577.234	0.230894
0.5698	1022	568.833	0.227533
0.56984	1052	560.614	0.224246
0.56988	1016	552.575	0.22103
0.56992	974.9	544.711	0.217884
0.56996	901.6	537.019	0.214808
0.57	831.6	529.496	0.211798
0.57004	785.9	522.138	0.208855
0.57008	697.8	514.942	0.205977
0.57012	672.7	507.907	0.203163
0.57016	626.1	501.028	0.200411
0.5702	635.8	494.303	0.197721
0.57024	625	487.729	0.195092
0.57028	634.5	481.303	0.192521
0.57032	627.9	475.024	0.19001
0.57036	589.1	468.888	0.187555
0.5704	554.6	462.893	0.185157
0.57044	512.5	457.036	0.182814
0.57048	493.9	451.315	0.180526
0.57052	483	445.728	0.178291
0.57056	471.6	440.271	0.176109
0.5706	502.6	434.944	0.173978
0.57064	558.7	429.743	0.171897
0.57068	614.8	424.667	0.169867
0.57072	649.2	419.712	0.167885
0.57076	656.3	414.878	0.165951
0.5708	660.6	410.16	0.164064
0.57084	603.2	405.559	0.162224
0.57088	576.5	401.071	0.160428
0.57092	498.2	396.695	0.158678
0.57096	404	392.43	0.156972
0.571	331.2	388.272	0.155309
0.57104	262.9	384.222	0.153689
0.57108	253	380.276	0.15211
0.57112	256.5	376.434	0.150574
0.57116	257.7	372.693	0.149077
0.5712	281.8	369.051	0.14762
0.57124	361.1	365.507	0.146203
0.57128	397.4	362.058	0.144823
0.57132	429.2	358.704	0.143481
0.57136	458.7	355.44	0.142176
0.5714	502.7	352.267	0.140907
0.57144	483	349.182	0.139673
0.57148	435.3	346.182	0.138473
0.57152	404	343.267	0.137307
0.57156	353.8	340.435	0.136174
0.5716	340.8	337.683	0.135073
0.57164	326.7	335.011	0.134004
0.57168	312.2	332.416	0.132966
0.57172	340.2	329.897	0.131959
0.57176	306.3	327.452	0.130981
0.5718	269.8	325.079	0.130032
0.57184	242.3	322.777	0.129111
0.57188	198.8	320.544	0.128217
0.57192	134.4	318.378	0.127351
0.57196	93.81	316.277	0.126511
0.572	63.95	314.239	0.125696
0.57204	77.13	312.263	0.124905
0.57208	105.3	310.347	0.124139
0.57212	164.5	308.487	0.123395
0.57216	223.9	306.682	0.122673
0.5722	318.6	304.93	0.121972
0.57224	389.4	303.229	0.121291
0.57228	461.1	301.575	0.12063
0.57232	509.5	299.967	0.119987
0.57236	538.6	298.402	0.119361
0.5724	583.2	296.879	0.118751
0.57244	542.2	295.394	0.118158
0.57248	501.9	293.947	0.117579
0.57252	476.4	292.536	0.117014
0.57256	435.6	291.158	0.116463
0.5726	363.7	289.812	0.115925
0.57264	358.3	288.497	0.115399
0.57268	328.2	287.21	0.114884
0.57272	330.7	285.95	0.11438
0.57276	330.3	284.715	0.113886
0.5728	335.6	283.505	0.113402
0.57284	345.8	282.317	0.112927
0.57288	354.6	281.151	0.11246
0.57292	351.3	280.003	0.112001
0.57296	354.1	278.874	0.11155
0.573	374.4	277.761	0.111104
0.57304	373.1	276.664	0.110665
0.57308	435.5	275.58	0.110232
0.57312	487.1	274.509	0.109804
0.57316	548	273.449	0.10938
0.5732	611.5	272.4	0.10896
0.57324	650.8	271.36	0.108544
0.57328	693.2	270.327	0.108131
0.57332	640.5	269.303	0.107721
0.57336	601.7	268.285	0.107314
0.5734	495.7	267.273	0.106909
0.57344	400.2	266.268	0.106507
0.57348	309.4	265.268	0.106107
0.57352	250.8	264.274	0.10571
0.57356	206.2	263.286	0.105314
0.5736	191.8	262.302	0.104921
0.57364	182.8	261.324	0.10453
0.57368	215.8	260.351	0.10414
0.57372	207.8	259.382	0.103753
0.57376	242.2	258.418	0.103367
0.5738	249.6	257.457	0.102983
0.57384	251.2	256.501	0.1026
0.57388	221.5	255.548	0.102219
0.57392	173.1	254.598	0.101839
0.57396	127.6	253.651	0.10146
0.574	56.76	252.707	0.101083
0.57404	-9.86	251.764	0.100706
0.57408	-53.01	250.823	0.100329
0.57412	-36.36	249.884	0.0999535
0.57416	-21.07	248.945	0.0995778
0.5742	-2.866	248.005	0.0992019
0.57424	55.57	247.064	0.0988255
0.57428	101.9	246.12	0.0984481
0.57432	167.7	245.173	0.0980693
0.57436	182.5	244.222	0.0976887
0.5744	200.9	243.264	0.0973058
0.57444	208.7	242.3	0.0969201
0.57448	221.4	241.328	0.0965311
0.57452	221.1	240.346	0.0961383
0.57456	231.4	239.353	0.0957413
0.5746	311.9	238.349	0.0953395
0.57464	370.4	237.331	0.0949324
0.57468	461.1	236.299	0.0945196
0.57472	520.7	235.251	0.0941005
0.57476	594.2	234.187	0.0936748
0.5748	598.6	233.105	0.0932421
0.57484	592.4	232.005	0.092802
0.57488	565.2	230.886	0.0923543
0.57492	487.4	229.747	0.0918987
0.57496	446.2	228.588	0.0914351
0.575	398.6	227.408	0.0909634
0.57504	413	226.209	0.0904834
0.57508	418.3	224.988	0.0899951
0.57512	432	223.746	0.0894986
0.57516	445.6	222.484	0.0889937
0.5752	477.3	221.201	0.0884805
0.57524	490	219.898	0.0879592
0.57528	519.4	218.574	0.0874297
0.57532	548.8	217.231	0.0868923
0.57536	583.5	215.868	0.0863472
0.5754	536.2	214.487	0.0857947
0.57544	527.1	213.087	0.0852349
0.57548	494.2	211.671	0.0846684
0.57552	378.7	210.239	0.0840955
0.57556	324.8	208.792	0.0835167
0.5756	296.9	207.331	0.0829324
0.57564	311.8	205.858	0.0823432
0.57568	283.8	204.374	0.0817496
0.57572	254.2	202.88	0.0811521
0.57576	243.6	201.378	0.0805513
0.5758	209.2	199.869	0.0799477
0.57584	97.8	198.355	0.0793419
0.57588	99.79	196.836	0.0787344
0.57592	57.57	195.315	0.0781259
0.57596	11.12	193.792	0.0775167
0.576	-49.74	192.269	0.0769076
0.57604	-20.67	190.747	0.0762988
0.57608	-26.16	189.227	0.0756909
0.57612	-23.7	187.711	0.0750843
0.57616	24.68	186.198	0.0744794
0.5762	75.11	184.691	0.0738764
0.57624	143.7	183.19	0.0732758
0.57628	187.5	181.695	0.0726778
0.57632	197.4	180.207	0.0720828
0.57636	203.4	178.727	0.071491
0.5764	176.4	177.257	0.0709027
0.57644	98.14	175.796	0.0703182
0.57648	63.92	174.345	0.0697379
0.57652	-10.87	172.905	0.069162
0.57656	-68.79	171.477	0.0685908
0.5766	-83.21	170.061	0.0680244
0.57664	-52.43	168.658	0.0674632
0.57668	26.9	167.268	0.0669073
0.57672	73	165.892	0.0663568
0.57676	95.17	164.529	0.0658118
0.5768	95.48	163.181	0.0652724
0.57684	134	161.847	0.0647388
0.57688	152.2	160.527	0.0642109
0.57692	170.7	159.222	0.0636888
0.57696	105.5	157.932	0.0631727
0.577	110.7	156.656	0.0626625
0.57704	52.25	155.396	0.0621583
0.57708	13.2	154.151	0.0616602
0.57712	-43.39	152.921	0.0611682
0.57716	-84.31	151.706	0.0606823
0.5772	-66.04	150.506	0.0602025
0.57724	-26.59	149.322	0.0597287
0.57728	7.567	148.152	0.0592608
0.57732	102.1	146.997	0.0587987
0.57736	190.5	145.856	0.0583424
0.5774	182	144.729	0.0578915
0.57744	233.2	143.615	0.0574461
0.57748	214	142.515	0.0570059
0.57752	189.6	141.427	0.0565708
0.57756	103.1	140.352	0.0561407
0.5776	18.06	139.289	0.0557156
0.57764	-28.5	138.238	0.0552952
0.57768	-36.19	137.199	0.0548795
0.57772	-8.993	136.171	0.0544683
0.57776	-18.68	135.154	0.0540614
0.5778	88.81	134.147	0.0536587
0.57784	99.27	133.149	0.0532598
0.57788	195.1	132.161	0.0528645
0.57792	201.1	131.182	0.0524727
0.57796	185.1	130.21	0.052084
0.578	149.4	129.246	0.0516983
0.57804	113.1	128.288	0.0513154
0.57808	121.1	127.337	0.0509349
0.57812	82.88	126.392	0.0505568
0.57816	132.3	125.452	0.0501808
0.5782	192.6	124.517	0.0498066
0.57824	267.7	123.585	0.0494341
0.57828	341.2	122.658	0.0490631
0.57832	409.1	121.733	0.0486933
0.57836	377.1	120.812	0.0483247
0.5784	377.4	119.893	0.0479571
0.57844	291.7	118.976	0.0475904
0.57848	220.4	118.062	0.0472247
0.57852	173.7	117.15	0.0468599
0.57856	169.9	116.24	0.046496
0.5786	163.3	115.333	0.0461332
0.57864	156.2	114.428	0.0457713
0.57868	205	113.526	0.0454104
0.57872	239.1	112.627	0.0450507
0.57876	303.3	111.73	0.0446922
0.5788	317.6	110.837	0.0443349
0.57884	278.7	109.948	0.043979
0.57888	273.3	109.062	0.0436247
0.57892	209.4	108.18	0.0432721
0.57896	129.4	107.303	0.0429213
0.579	65.02	106.432	0.0425727
0.57904	12.65	105.566	0.0422265
0.57908	16.5	104.707	0.0418828
0.57912	-43.21	103.855	0.0415419
0.57916	-21.97	103.01	0.0412039
0.5792	-3.387	102.172	0.040869
0.57924	32.91	101.343	0.0405374
0.57928	30.46	100.523	0.0402091
0.57932	57.16	99.7109	0.0398844
0.57936	86.55	98.9081	0.0395632
0.5794	67.25	98.1145	0.0392458
0.57944	75.14	97.3305	0.0389322
0.57948	37.39	96.5562	0.0386225
0.57952	3.665	95.7918	0.0383167
0.57956	4.475	95.0376	0.0380151
0.5796	15.08	94.2937	0.0377175
0.57964	8.723	93.5603	0.0374241
0.57968	10.78	92.8373	0.0371349
0.57972	35.28	92.125	0.03685
0.57976	7.654	91.4232	0.0365693
0.5798	36.67	90.7321	0.0362928
0.57984	3.087	90.0516	0.0360206
0.57988	5.168	89.3816	0.0357526
0.57992	-3.387	88.722	0.0354888
0.57996	19.13	88.0727	0.0352291
0.58	10.49	87.4336	0.0349735
0.58004	34.13	86.8046	0.0347218
0.58008	3.001	86.1852	0.0344741
0.58012	42.34	85.5754	0.0342302
0.58016	48.23	84.9749	0.03399
0.5802	20.6	84.3833	0.0337533
0.58024	6.902	83.8005	0.0335202
0.58028	47.34	83.2259	0.0332904
0.58032	34.97	82.6594	0.0330638
0.58036	14.19	82.1005	0.0328402
0.5804	29.21	81.5488	0.0326195
0.58044	15.05	81.0039	0.0324016
0.58048	37.34	80.4654	0.0321862
0.58052	37.13	79.9328	0.0319731
0.58056	31.01	79.4057	0.0317623
0.5806	34.18	78.8835	0.0315534
0.58064	61.73	78.3656	0.0313463
0.58068	82.33	77.8517	0.0311407
0.58072	81.29	77.3411	0.0309364
0.58076	66.18	76.8333	0.0307333
0.5808	63.23	76.3277	0.0305311
0.58084	72.02	75.8238	0.0303295
0.58088	49.16	75.3212	0.0301285
0.58092	39.53	74.8191	0.0299276
0.58096	35.05	74.317	0.0297268
0.581	6.44	73.8145	0.0295258
0.58104	2.538	73.3108	0.0293243
0.58108	-29.8	72.8053	0.0291221
0.58112	-64.45	72.2975	0.028919
0.58116	-52.75	71.7865	0.0287146
0.5812	0.7753	71.2717	0.0285087
0.58124	63.32	70.7523	0.0283009
0.58128	158.8	70.2275	0.028091
0.58132	228.5	69.6965	0.0278786
0.58136	335.4	69.1584	0.0276634
0.5814	392.7	68.6127	0.0274451
0.58144	423.4	68.0586	0.0272235
0.58148	426.5	67.4958	0.0269983
0.58152	385	66.9238	0.0267695
0.58156	345.4	66.3425	0.026537
0.5816	300	65.7517	0.0263007
0.58164	238	65.1516	0.0260606
0.58168	172	64.5421	0.0258169
0.58172	183.3	63.9236	0.0255694
0.58176	186.6	63.2962	0.0253185
0.5818	191.7	62.6602	0.0250641
0.58184	200.7	62.0159	0.0248064
0.58188	216.6	61.3639	0.0245456
0.58192	188.1	60.7044	0.0242818
0.58196	141.5	60.0381	0.0240152
0.582	74.18	59.3654	0.0237461
0.58204	37.19	58.6869	0.0234747
0.58208	33.75	58.0032	0.0232013
0.58212	-2.086	57.315	0.022926
0.58216	-17.95	56.6227	0.0226491
0.5822	1.122	55.9269	0.0223708
0.58224	25.28	55.2282	0.0220913
0.58228	-2.664	54.527	0.0218108
0.58232	50.2	53.8239	0.0215296
0.58236	50.83	53.1193	0.0212477
0.5824	61.61	52.4137	0.0209655
0.58244	64.5	51.7075	0.020683
0.58248	35.95	51.0013	0.0204005
0.58252	25.43	50.2954	0.0201182
0.58256	-17.52	49.5904	0.0198362
0.5826	-27.95	48.8867	0.0195547
0.58264	-49.31	48.1848	0.0192739
0.58268	1.96	47.4849	0.018994
0.58272	-11.94	46.7876	0.018715
0.58276	26.29	46.0931	0.0184372
0.5828	62.16	45.4018	0.0181607
0.58284	54.18	44.7139	0.0178856
0.58288	29.36	44.0298	0.0176119
0.58292	21.09	43.3499	0.01734
0.58296	18.49	42.6744	0.0170698
0.583	10.28	42.0037	0.0168015
0.58304	-6.306	41.3379	0.0165352
0.58308	-27.4	40.6775	0.016271
0.58312	-20.99	40.0227	0.0160091
0.58316	-30.5	39.3737	0.0157495
0.5832	-19.4	38.7307	0.0154923
0.58324	-71.45	38.094	0.0152376
0.58328	-76.65	37.4636	0.0149854
0.58332	17.83	36.8397	0.0147359
0.58336	19.73	36.2224	0.014489
0.5834	66.81	35.6118	0.0142447
0.58344	89.94	35.0078	0.0140031
0.58348	64.5	34.4107	0.0137643
0.58352	19.85	33.8205	0.0135282
0.58356	-9.803	33.2372	0.0132949
0.5836	-18.24	32.6611	0.0130644
0.58364	-10.99	32.0921	0.0128368
0.58368	-6.71	31.5303	0.0126121
0.58372	14.53	30.9758	0.0123903
0.58376	17.08	30.4286	0.0121714
0.5838	15.2	29.8888	0.0119555
0.58384	-3.213	29.3563	0.0117425
0.58388	3.492	28.8311	0.0115325
0.58392	11.47	28.3134	0.0113253
0.58396	9.879	27.803	0.0111212
0.584	17.02	27.2999	0.01092
0.58404	19.04	26.8041	0.0107216
0.58408	17.91	26.3157	0.0105263
0.58412	8.058	25.8344	0.0103338
0.58416	3.319	25.3605	0.0101442
0.5842	-14.28	24.8936	0.00995746
0.58424	-34.46	24.434	0.00977359
0.58428	-53.36	23.9813	0.00959253
0.58432	-48.99	23.5357	0.00941427
0.58436	11.09	23.0968	0.00923874
0.5844	-15.5	22.6647	0.00906589
0.58444	26.21	22.2392	0.00889566
0.58448	72.51	21.82	0.00872799
0.58452	66.99	21.407	0.0085628
0.58456	64.85	21.0001	0.00840005
0.5846	72.74	20.5992	0.00823968
0.58464	37.8	20.2041	0.00808164
0.58468	20.95	19.8147	0.00792589
0.58472	22.71	19.431	0.00777241
0.58476	-29.34	19.0529	0.00762116
0.5848	-95.61	18.6802	0.00747209
0.58484	-62.6	18.3129	0.00732518
0.58488	-100.5	17.9509	0.00718035
0.58492	-110	17.5938	0.00703753
0.58496	-27.29	17.2416	0.00689664
0.585	45.54	16.8939	0.00675756
0.58504	73.14	16.5505	0.00662019
0.58508	89.5	16.211	0.00648442
0.58512	57.22	15.8753	0.00635013
0.58516	57.22	15.5431	0.00621724
0.5852	2.452	15.2142	0.00608566
0.58524	-102.9	14.8883	0.00595531
0.58528	-168	14.5652	0.00582609
0.58532	-97.49	14.2447	0.0056979
0.58536	-57.17	13.9265	0.00557061
0.5854	-98.33	13.6102	0.00544409
0.58544	-63.7	13.2954	0.00531817
0.58548	-24.2	12.9817	0.00519267
0.58552	-11.02	12.6685	0.00506741
0.58556	45.63	12.3555	0.0049422
0.5856	39.62	12.0421	0.00481684
0.58564	15.31	11.7278	0.00469113
0.58568	-4.889	11.4122	0.0045649
0.58572	14.16	11.0949	0.00443794
0.58576	6.238	10.7752	0.00431007
0.5858	-14.43	10.4527	0.00418109
0.58584	-67.29	10.1271	0.00405082
0.58588	-93.47	9.79764	0.00391906
0.58592	-53.47	9.46396	0.00378558
0.58596	-17.06	9.12547	0.00365019
0.586	-8.849	8.78158	0.00351263
0.58604	-54.63	8.4317	0.00337268
0.58608	46.5	8.07523	0.00323009
0.58612	18.49	7.71155	0.00308462
0.58616	-15.52	7.34004	0.00293602
0.5862	25.8	6.9601	0.00278404
0.58624	28.29	6.5711	0.00262844
0.58628	117	6.17245	0.00246898
0.58632	220.3	5.76356	0.00230542
0.58636	214.3	5.34389	0.00213756
0.5864	253.1	4.91297	0.00196519
0.58644	278.5	4.47042	0.00178817
0.58648	283.2	4.01595	0.00160638
0.58652	238.2	3.54939	0.00141976
0.58656	243.4	3.07067	0.00122827
0.5866	201.6	2.5798	0.00103192
0.58664	209.3	2.0769	0.000830758
0.58668	208.1	1.56217	0.000624868
0.58672	103.2	1.0359	0.000414359
0.58676	92.97	0.498428	0.000199371
0.5868	30.46	-0.0498358	-1.99343e-05
0.58684	25.31	-0.608461	-0.000243384
0.58688	32.8	-1.17699	-0.000470797
0.58692	24.88	-1.75496	-0.000701986
0.58696	-13.33	-2.3419	-0.00093676
0.587	25.37	-2.93731	-0.00117492
0.58704	58.23	-3.54071	-0.00141628
0.58708	51.29	-4.15158	-0.00166063
0.58712	27.25	-4.76942	-0.00190777
0.58716	-23.15	-5.39368	-0.00215747
0.5872	-19.92	-6.02382	-0.00240953
0.58724	24.73	-6.65927	-0.00266371
0.58728	29.1	-7.2995	-0.0029198
0.58732	52.54	-7.94394	-0.00317757
0.58736	60.69	-8.59201	-0.0034368
0.5874	50.89	-9.24313	-0.00369725
0.58744	23.29	-9.89666	-0.00395866
0.58748	-6.392	-10.552	-0.00422079
0.58752	-21.62	-11.2084	-0.00448336
0.58756	-74.22	-11.8653	-0.00474612
0.5876	-41.33	-12.522	-0.0050088
0.58764	-19.8	-13.1779	-0.00527116
0.58768	-22.46	-13.8323	-0.00553293
0.58772	-18.07	-14.4847	-0.00579388
0.58776	-38.36	-15.1344	-0.00605375
0.5878	-71.36	-15.7808	-0.00631231
0.58784	-85.47	-16.4233	-0.00656931
0.58788	-39.2	-17.0613	-0.00682452
0.58792	-29.31	-17.6943	-0.00707771
0.58796	-5.814	-18.3217	-0.00732867
0.588	19.04	-18.943	-0.00757718
0.58804	-43.91	-19.5575	-0.00782302
0.58808	-43.41	-20.1649	-0.00806596
0.58812	-38.5	-20.7645	-0.00830579
0.58816	-51.74	-21.3557	-0.00854229
0.5882	-48.99	-21.9381	-0.00877524
0.58824	-34.89	-22.5111	-0.00900444
0.58828	-20.76	-23.0742	-0.00922969
0.58832	-36.3	-23.6269	-0.00945076
0.58836	-52.08	-24.1687	-0.00966747
0.5884	-56.22	-24.699	-0.00987962
0.58844	-55.7	-25.2175	-0.010087
0.58848	-38.62	-25.7236	-0.0102894
0.58852	-9.34	-26.2168	-0.0104867
0.58856	-37.72	-26.6966	-0.0106787
0.5886	-18.13	-27.1627	-0.0108651
0.58864	-32.61	-27.6146	-0.0110458
0.58868	-62.98	-28.0517	-0.0112207
0.58872	-46.91	-28.4736	-0.0113894
0.58876	-54.95	-28.8798	-0.0115519
0.5888	-115.6	-29.27	-0.011708
0.58884	-102.6	-29.6437	-0.0118575
0.58888	-92.34	-30.0005	-0.0120002
0.58892	-94.83	-30.34	-0.012136
0.58896	-55.76	-30.6618	-0.0122647
0.589	-113.2	-30.9657	-0.0123863
0.58904	-122.2	-31.2514	-0.0125005
0.58908	-76.51	-31.5185	-0.0126074
0.58912	-136.2	-31.7668	-0.0127067
0.58916	-177.4	-31.9961	-0.0127985
0.5892	-93.7	-32.2063	-0.0128825
0.58924	-95.15	-32.3971	-0.0129589
0.58928	-133	-32.5686	-0.0130274
0.58932	-135	-32.7205	-0.0130882
0.58936	-135.9	-32.853	-0.0131412
0.5894	-147.6	-32.9659	-0.0131864
0.58944	-135.8	-33.0594	-0.0132238
0.58948	-139.5	-33.1336	-0.0132534
0.58952	-140.6	-33.1885	-0.0132754
0.58956	-129.4	-33.2244	-0.0132897
0.5896	-130.6	-33.2414	-0.0132966
0.58964	-139	-33.2399	-0.013296
0.58968	-123.6	-33.2201	-0.013288
0.58972	-119.2	-33.1823	-0.0132729
0.58976	-121.7	-33.127	-0.0132508
0.5898	-99.54	-33.0546	-0.0132218
0.58984	-115.8	-32.9654	-0.0131862
0.58988	-84.8	-32.86	-0.013144
0.58992	-96.62	-32.7388	-0.0130955
0.58996	-68.85	-32.6025	-0.013041
0.59	-75.78	-32.4515	-0.0129806
0.59004	-86.97	-32.2864	-0.0129145
0.59008	-48.67	-32.1077	-0.0128431
0.59012	-31.28	-31.9162	-0.0127665
0.59016	14.94	-31.7123	-0.0126849
0.5902	45.57	-31.4968	-0.0125987
0.59024	97.45	-31.2701	-0.012508
0.59028	130.1	-31.0328	-0.0124131
0.59032	119.4	-30.7855	-0.0123142
0.59036	131.3	-30.5286	-0.0122114
0.5904	133.3	-30.2624	-0.012105
0.59044	86.61	-29.9873	-0.0119949
0.59048	63.84	-29.7036	-0.0118814
0.59052	24.94	-29.4114	-0.0117646
0.59056	46.87	-29.111	-0.0116444
0.5906	50.92	-28.8025	-0.011521
0.59064	23.23	-28.486	-0.0113944
0.59068	36.84	-28.1616	-0.0112646
0.59072	19.53	-27.8293	-0.0111317
0.59076	33.92	-27.4893	-0.0109957
0.5908	-16.88	-27.1415	-0.0108566
0.59084	-30.84	-26.786	-0.0107144
0.59088	-76.56	-26.4227	-0.0105691
0.59092	-110	-26.0517	-0.0104207
0.59096	-116.1	-25.6729	-0.0102691
0.591	-162.3	-25.2864	-0.0101146
0.59104	-151.3	-24.8924	-0.00995695
0.59108	-126.2	-24.4909	-0.00979635
0.59112	-109	-24.0821	-0.00963284
0.59116	-89.34	-23.6663	-0.00946653
0.5912	-51.39	-23.2438	-0.0092975
0.59124	-29.22	-22.8147	-0.00912588
0.59128	-33.53	-22.3795	-0.00895178
0.59132	-19.54	-21.9383	-0.00877533
0.59136	-30.03	-21.4916	-0.00859665
0.5914	-20.96	-21.0396	-0.00841586
0.59144	-28.91	-20.5827	-0.00823309
0.59148	-60.24	-20.1211	-0.00804846
0.59152	-18.21	-19.6552	-0.0078621
0.59156	-37	-19.1854	-0.00767414
0.5916	-26.94	-18.7118	-0.00748472
0.59164	5.11	-18.2349	-0.00729396
0.59168	4.59	-17.755	-0.00710201
0.59172	9.185	-17.2725	-0.00690899
0.59176	8.434	-16.7876	-0.00671504
0.5918	0.544	-16.3007	-0.00652028
0.59184	-0.3519	-15.8121	-0.00632482
0.59188	7.191	-15.322	-0.0061288
0.59192	17.54	-14.8308	-0.00593232
0.59196	-5.814	-14.3387	-0.00573549
0.592	-8.155	-13.8461	-0.00553843
0.59204	-6.248	-13.3531	-0.00534124
0.59208	22.28	-12.8601	-0.00514402
0.59212	10.98	-12.3672	-0.00494689
0.59216	16.76	-11.8748	-0.00474992
0.5922	47.28	-11.3831	-0.00455322
0.59224	40.51	-10.8922	-0.00435688
0.59228	41.81	-10.4025	-0.00416098
0.59232	19.79	-9.91397	-0.00396559
0.59236	35.4	-9.42692	-0.00377077
0.5924	5.746	-8.94145	-0.00357658
0.59244	-17.2	-8.45769	-0.00338308
0.59248	-1.219	-7.97579	-0.00319031
0.59252	-31.51	-7.49585	-0.00299834
0.59256	-14.22	-7.01801	-0.0028072
0.5926	8.694	-6.5424	-0.00261696
0.59264	27.28	-6.06915	-0.00242766
0.59268	5.457	-5.59839	-0.00223936
0.59272	19.56	-5.13025	-0.0020521
0.59276	63.03	-4.66483	-0.00186593
0.5928	13.43	-4.20222	-0.00168089
0.59284	3.839	-3.74252	-0.00149701
0.59288	-3.3	-3.2858	-0.00131432
0.59292	-54.98	-2.83212	-0.00113285
0.59296	-70.15	-2.38156	-0.000952622
0.593	-32.84	-1.9342	-0.000773681
0.59304	-49.02	-1.49017	-0.000596067
0.59308	-18.39	-1.04958	-0.000419831
0.59312	18.35	-0.612573	-0.000245029
0.59316	55.57	-0.1793	-7.17198e-05
0.5932	51.64	0.250104	0.000100042
0.59324	57.45	0.675516	0.000270207
0.59328	60.98	1.09684	0.000438734
0.59332	40.72	1.51398	0.000605593
0.59336	29.85	1.9269	0.000770759
0.5934	-21.88	2.33554	0.000934216
0.59344	-42.69	2.73987	0.00109595
0.59348	-44.22	3.13985	0.00125594
0.59352	-29.48	3.53541	0.00141416
0.59356	0.4573	3.92649	0.0015706
0.5936	-1.768	4.313	0.0017252
0.59364	38.35	4.69486	0.00187794
0.59368	72.39	5.07197	0.00202879
0.59372	65.57	5.44427	0.00217771
0.59376	80.51	5.8117	0.00232468
0.5938	46.06	6.17423	0.00246969
0.59384	20.86	6.53187	0.00261275
0.59388	27.94	6.88463	0.00275385
0.59392	15.31	7.23252	0.00289301
0.59396	-14.69	7.57558	0.00303023
0.594	-21.57	7.91383	0.00316553
0.59404	-21.71	8.24731	0.00329893
0.59408	-14.22	8.57603	0.00343041
0.59412	-22.03	8.89999	0.00355999
0.59416	9.503	9.21917	0.00368767
0.5942	23.61	9.53358	0.00381343
0.59424	30.11	9.84319	0.00393727
0.59428	51.64	10.148	0.00405919
0.59432	14.36	10.448	0.00417919
0.59436	10.78	10.7432	0.00429726
0.5944	-22.55	11.0335	0.00441342
0.59444	-8.762	11.3191	0.00452765
0.59448	-29.77	11.5999	0.00463998
0.59452	-36.39	11.876	0.00475038
0.59456	-14.57	12.1471	0.00485886
0.5946	-18.65	12.4135	0.00496539
0.59464	-13.7	12.6749	0.00506995
0.59468	-27.63	12.9313	0.00517251
0.59472	-10.44	13.1826	0.00527305
0.59476	6.469	13.4288	0.00537152
0.5948	38.64	13.6697	0.00546789
0.59484	21.21	13.9053	0.00556212
0.59488	19.47	14.1354	0.00565416
0.59492	26.67	14.36	0.00574398
0.59496	39.27	14.5789	0.00583155
0.595	-18.59	14.792	0.00591682
0.59504	-28.96	14.9994	0.00599977
0.59508	-30.47	15.2009	0.00608035
0.59512	-9.514	15.3963	0.00615853
0.59516	17.74	15.5856	0.00623425
0.5952	7.625	15.7687	0.00630747
0.59524	15.43	15.9453	0.00637813
0.59528	58.32	16.1154	0.00644617
0.59532	61.99	16.2789	0.00651155
0.59536	58.78	16.4355	0.0065742
0.5954	106.8	16.5853	0.00663411
0.59544	66.9	16.728	0.00669122
0.59548	50.89	16.8638	0.00674552
0.59552	22.88	16.9925	0.006797
0.59556	43.23	17.1141	0.00684564
0.5956	23.03	17.2286	0.00689145
0.59564	1.874	17.336	0.00693441
0.59568	-26.97	17.4363	0.00697454
0.59572	45.37	17.5295	0.00701181
0.59576	36.55	17.6156	0.00704624
0.5958	48.55	17.6945	0.0070778
0.59584	15.86	17.7663	0.0071065
0.59588	71.06	17.8309	0.00713235
0.59592	86.26	17.8883	0.00715533
0.59596	120.5	17.9387	0.00717548
0.596	107.3	17.982	0.00719281
0.59604	67.83	18.0184	0.00720735
0.59608	28.12	18.0479	0.00721916
0.59612	-1.826	18.0707	0.00722829
0.59616	-37.89	18.087	0.00723481
0.5962	-43.18	18.0969	0.00723876
0.59624	19.01	18.1005	0.0072402
0.59628	8.983	18.0979	0.00723917
0.59632	13.32	18.0893	0.00723572
0.59636	33.92	18.0747	0.00722987
0.5964	27.13	18.0542	0.00722167
0.59644	50.4	18.0279	0.00721116
0.59648	47.86	17.996	0.00719838
0.59652	30.86	17.9585	0.00718338
0.59656	21.41	17.9155	0.00716621
0.5966	43.84	17.8673	0.00714692
0.59664	19.13	17.8139	0.00712556
0.59668	-64.86	17.7555	0.0071022
0.59672	-66.02	17.6922	0.00707688
0.59676	-30.09	17.6241	0.00704965
0.5968	-35.5	17.5514	0.00702055
0.59684	42.57	17.474	0.0069896
0.59688	72.68	17.392	0.00695682
0.59692	83.17	17.3056	0.00692223
0.59696	78.9	17.2147	0.00688586
0.597	105.5	17.1194	0.00684776
0.59704	66.15	17.0199	0.00680797
0.59708	-18.27	16.9164	0.00676655
0.59712	5.486	16.8089	0.00672356
0.59716	-49.25	16.6977	0.00667908
0.5972	-55.76	16.5829	0.00663317
0.59724	-44.74	16.4647	0.00658587
0.59728	-49.4	16.3431	0.00653723
0.59732	-34.34	16.2182	0.00648728
0.59736	2.394	16.0901	0.00643604
0.5974	-30.96	15.9588	0.00638353
0.59744	38.38	15.8244	0.00632975
0.59748	68.29	15.6868	0.00627472
0.59752	72.83	15.5461	0.00621845
0.59756	84.39	15.4024	0.00616094
0.5976	62.39	15.2556	0.00610224
0.59764	32.86	15.1059	0.00604236
0.59768	19.39	14.9534	0.00598135
0.59772	-4.311	14.7981	0.00591926
0.59776	-38.1	14.6403	0.00585613
0.5978	-31.25	14.48	0.005792
0.59784	-1.132	14.3173	0.00572691
0.59788	9.677	14.1522	0.00566088
0.59792	25.25	13.9849	0.00559395
0.59796	2.885	13.8154	0.00552614
0.598	14.39	13.6437	0.00545748
0.59804	-9.687	13.47	0.00538798
0.59808	-11.48	13.2942	0.00531768
0.59812	-3.993	13.1165	0.00524659
0.59816	5.226	12.9369	0.00517474
0.5982	17.19	12.7553	0.00510213
0.59824	17.94	12.572	0.00502879
0.59828	17.34	12.3868	0.00495472
0.59832	45.4	12.1999	0.00487994
0.59836	33	12.0112	0.00480447
0.5984	22.71	11.8208	0.00472833
0.59844	71.64	11.6289	0.00465154
0.59848	39.97	11.4353	0.00457414
0.59852	59.5	11.2404	0.00449615
0.59856	41.5	11.044	0.00441761
0.5986	22.77	10.8465	0.00433858
0.59864	40.05	10.6478	0.00425911
0.59868	13.43	10.4481	0.00417924
0.59872	-49.45	10.2476	0.00409904
0.59876	-69.05	10.0464	0.00401857
0.5988	-65.23	9.84466	0.00393787
0.59884	-62.06	9.64243	0.00385697
0.59888	-34.22	9.43979	0.00377591
0.59892	15.54	9.23677	0.00369471
0.59896	61.38	9.03342	0.00361337
0.599	66.12	8.82975	0.0035319
0.59904	70.74	8.62581	0.00345032
0.59908	45.77	8.42166	0.00336866
0.59912	42.97	8.2174	0.00328696
0.59916	14.88	8.01312	0.00320525
0.5992	20.51	7.80893	0.00312357
0.59924	-5.988	7.60496	0.00304199
0.59928	-16.31	7.40133	0.00296053
0.59932	-37.78	7.19816	0.00287926
0.59936	-83.91	6.99555	0.00279822
0.5994	-79.51	6.79359	0.00271743
0.59944	-41.8	6.59233	0.00263693
0.59948	-17.17	6.3918	0.00255672
0.59952	-1.248	6.19202	0.00247681
0.59956	36.99	5.99298	0.00239719
0.5996	64.68	5.79467	0.00231787
0.59964	66.58	5.59711	0.00223885
0.59968	51.12	5.40032	0.00216013
0.59972	34.5	5.20435	0.00208174
0.59976	5.746	5.00927	0.00200371
0.5998	-22.63	4.81515	0.00192606
0.59984	-16.39	4.62206	0.00184882
0.59988	-43.79	4.43008	0.00177203
0.59992	-47.14	4.23927	0.00169571
0.59996	-48.73	4.04966	0.00161986
0.6	-23.79	3.86127	0.00154451
0.60004	-8.329	3.67412	0.00146965
0.60008	-4.311	3.4882	0.00139528
0.60012	14.16	3.30348	0.00132139
0.60016	37.65	3.11997	0.00124799
0.6002	68.52	2.93764	0.00117506
0.60024	45.89	2.75651	0.0011026
0.60028	39.21	2.57659	0.00103063
0.60032	0.862	2.39792	0.00095917
0.60036	-37.4	2.22057	0.000888228
0.6004	-23.91	2.04458	0.000817831
0.60044	-64.22	1.86998	0.000747993
0.60048	-73.53	1.69682	0.000678727
0.60052	-30.73	1.52508	0.000610032
0.60056	-48.04	1.35475	0.000541902
0.6006	-29.11	1.1858	0.00047432
0.60064	-14.43	1.01816	0.000407264
0.60068	20.57	0.851773	0.000340709
0.60072	23.09	0.686564	0.000274626
0.60076	50.37	0.52247	0.000208988
0.6008	16.04	0.359433	0.000143773
0.60084	30.05	0.197411	7.89643e-05
0.60088	11.3	0.0363706	1.45482e-05
0.60092	-3.849	-0.123711	-4.94846e-05
0.60096	-15.52	-0.282855	-0.000113142
0.601	-45.84	-0.441081	-0.000176432
0.60104	-36.71	-0.598418	-0.000239367
0.60108	-25.84	-0.754907	-0.000301963
0.60112	-20.29	-0.910604	-0.000364242
0.60116	-0.03397	-1.06557	-0.00042623
0.6012	11.24	-1.21989	-0.000487955
0.60124	30.05	-1.37361	-0.000549446
0.60128	27.34	-1.52682	-0.000610729
0.60132	9.503	-1.67957	-0.000671828
0.60136	6.006	-1.8319	-0.000732761
0.6014	-3.762	-1.98386	-0.000793545
0.60144	-23.79	-2.13549	-0.000854195
0.60148	-15.93	-2.28682	-0.000914729
0.60152	-7.086	-2.43791	-0.000975165
0.60156	-5.785	-2.58881	-0.00103552
0.6016	-8.242	-2.73956	-0.00109582
0.60164	-2.635	-2.89022	-0.00115609
0.60168	8.405	-3.04086	-0.00121634
0.60172	-18.62	-3.19152	-0.00127661
0.60176	6.411	-3.34227	-0.00133691
0.6018	4.821	-3.49315	-0.00139726
0.60184	1.845	-3.64423	-0.00145769
0.60188	-17.89	-3.79555	-0.00151822
0.60192	-7.635	-3.94718	-0.00157887
0.60196	-25.7	-4.09915	-0.00163966
0.602	-12.52	-4.25154	-0.00170062
0.60204	-2.317	-4.40441	-0.00176176
0.60208	-13.53	-4.55782	-0.00182313
0.60212	5.197	-4.71184	-0.00188473
0.60216	1.035	-4.86654	-0.00194661
0.6022	7.972	-5.02199	-0.00200879
0.60224	5.891	-5.17825	-0.0020713
0.60228	15.83	-5.33538	-0.00213415
0.60232	5.255	-5.49344	-0.00219738
0.60236	-23.39	-5.65247	-0.00226099
0.6024	6.44	-5.81253	-0.00232501
0.60244	-31.13	-5.97366	-0.00238946
0.60248	-11.97	-6.1359	-0.00245436
0.60252	-10.58	-6.29932	-0.00251973
0.60256	0.1394	-6.46396	-0.00258559
0.6026	4.764	-6.62989	-0.00265196
0.60264	3.579	-6.79716	-0.00271887
0.60268	2.105	-6.96583	-0.00278633
0.60272	6.209	-7.13593	-0.00285437
0.60276	-0.6409	-7.30752	-0.00292301
0.6028	-5.294	-7.48063	-0.00299225
0.60284	-0.7565	-7.6553	-0.00306212
0.60288	-2.722	-7.83156	-0.00313263
0.60292	-7.375	-8.00946	-0.00320378
0.60296	-11.33	-8.18901	-0.0032756
0.603	-17.87	-8.37025	-0.0033481
0.60304	-18.76	-8.55322	-0.00342129
0.60308	-10.03	-8.73795	-0.00349518
0.60312	15.49	-8.92447	-0.00356979
0.60316	27.31	-9.11282	-0.00364513
0.6032	20.17	-9.30303	-0.00372121
0.60324	18.98	-9.49511	-0.00379804
0.60328	1.267	-9.68908	-0.00387563
0.60332	29.42	-9.88491	-0.00395397
0.60336	6.151	-10.0826	-0.00403304
0.6034	-5.063	-10.2821	-0.00411286
0.60344	-0.8432	-10.4835	-0.00419339
0.60348	-36.68	-10.6866	-0.00427463
0.60352	-12.29	-10.8914	-0.00435656
0.60356	-2.317	-11.0979	-0.00443917
0.6036	1.44	-11.3061	-0.00452245
0.60364	14.82	-11.516	-0.00460639
0.60368	1.44	-11.7274	-0.00469095
0.60372	27.05	-11.9404	-0.00477614
0.60376	9.995	-12.1548	-0.00486193
0.6038	-9.687	-12.3707	-0.00494828
0.60384	-20.21	-12.5879	-0.00503517
0.60388	-38.53	-12.8064	-0.00512257
0.60392	-12.63	-13.0261	-0.00521045
0.60396	-25.67	-13.247	-0.00529879
0.604	-18.27	-13.4689	-0.00538755
0.60404	-3.04	-13.6918	-0.00547671
0.60408	20.14	-13.9156	-0.00556625
0.60412	30.28	-14.1403	-0.00565613
0.60416	26.47	-14.3658	-0.00574634
0.6042	37.48	-14.5921	-0.00583682
0.60424	26.84	-14.8189	-0.00592754
0.60428	2.22	-15.0461	-0.00601845
0.60432	19.79	-15.2737	-0.00610948
0.60436	-9.745	-15.5014	-0.00620057
0.6044	-21.51	-15.7292	-0.00629166
0.60444	-16.97	-15.9567	-0.00638268
0.60448	-30.5	-16.1839	-0.00647356
0.60452	-27.43	-16.4106	-0.00656424
0.60456	-32.03	-16.6366	-0.00665465
0.6046	-2.491	-16.8618	-0.00674472
0.60464	1.006	-17.086	-0.0068344
0.60468	6.18	-17.309	-0.00692362
0.60472	30.25	-17.5308	-0.00701231
0.60476	18.32	-17.751	-0.0071004
0.6048	17.02	-17.9695	-0.00718782
0.60484	7.712	-18.1862	-0.00727448
0.60488	-14.46	-18.4007	-0.00736029
0.60492	-49.14	-18.6129	-0.00744516
0.60496	-54.45	-18.8225	-0.00752901
0.605	-62	-19.0293	-0.00761174
0.60504	-44.74	-19.2332	-0.00769327
0.60508	-63.33	-19.4338	-0.00777352
0.60512	-65.64	-19.6311	-0.00785243
0.60516	11.73	-19.8248	-0.00792992
0.6052	-17.87	-20.0148	-0.00800594
0.60524	-68.79	-20.201	-0.00808042
0.60528	-20.61	-20.3833	-0.0081533
0.60532	-25.93	-20.5613	-0.00822453
0.60536	-89.37	-20.7351	-0.00829405
0.6054	-135.5	-20.9045	-0.00836181
0.60544	-94.83	-21.0694	-0.00842776
0.60548	-79.05	-21.2297	-0.00849189
0.60552	-44.95	-21.3854	-0.00855418
0.60556	-5.352	-21.5365	-0.00861462
0.6056	-34.37	-21.683	-0.0086732
0.60564	10.08	-21.8248	-0.00872993
0.60568	36.9	-21.962	-0.0087848
0.60572	-81.28	-22.0945	-0.0088378
0.60576	-76.77	-22.2223	-0.00888893
0.6058	-51.02	-22.3454	-0.00893818
0.60584	-64.8	-22.4639	-0.00898555
0.60588	2.191	-22.5776	-0.00903104
0.60592	59.53	-22.6867	-0.00907468
0.60596	-21.02	-22.7911	-0.00911646
0.606	-16.54	-22.891	-0.00915638
0.60604	18.98	-22.9861	-0.00919445
0.60608	-46.65	-23.0766	-0.00923065
0.60612	-15.26	-23.1625	-0.00926498
0.60616	118.6	-23.2436	-0.00929743
0.6062	39.13	-23.32	-0.00932798
0.60624	17.71	-23.3915	-0.00935661
0.60628	-30	-23.4582	-0.00938327
0.60632	-86.71	-23.5198	-0.00940792
0.60636	-45.35	-23.5763	-0.00943052
0.6064	-33.79	-23.6276	-0.00945103
0.60644	-89.57	-23.6735	-0.00946942
0.60648	-113.7	-23.7141	-0.00948565
0.60652	-52.06	-23.7493	-0.00949971
0.60656	-87.46	-23.779	-0.00951159
0.6066	-86.54	-23.8032	-0.00952129
0.60664	-27.61	-23.822	-0.00952881
0.60668	-55.5	-23.8354	-0.00953417
0.60672	-47.98	-23.8435	-0.0095374
0.60676	15.77	-23.8462	-0.0095385
0.6068	-18.3	-23.8438	-0.00953751
0.60684	-37.69	-23.8361	-0.00953445
0.60688	-24.34	-23.8234	-0.00952934
0.60692	-63.47	-23.8055	-0.00952221
0.60696	-100.1	-23.7827	-0.00951307
0.607	-31.85	-23.7549	-0.00950196
0.60704	3.203	-23.7223	-0.00948892
0.60708	14.1	-23.685	-0.00947398
0.60712	50.86	-23.643	-0.00945719
0.60716	44.5	-23.5964	-0.00943857
0.6072	-15.38	-23.5453	-0.00941814
0.60724	18.69	-23.4898	-0.00939591
0.60728	-7.057	-23.4298	-0.0093719
0.60732	-43.41	-23.3653	-0.00934611
0.60736	9.792	-23.2963	-0.00931853
0.6074	-19.28	-23.2229	-0.00928917
0.60744	-11.62	-23.145	-0.00925802
0.60748	-6.739	-23.0627	-0.00922508
0.60752	-34.22	-22.9758	-0.00919034
0.60756	-71.77	-22.8845	-0.0091538
0.6076	-91.54	-22.7886	-0.00911545
0.60764	-67.03	-22.6882	-0.00907529
0.60768	-83.3	-22.5834	-0.00903334
0.60772	-6.045	-22.474	-0.00898962
0.60776	61.99	-22.3604	-0.00894414
0.6078	47.8	-22.2423	-0.00889694
0.60784	6.729	-22.12	-0.00884801
0.60788	29.73	-21.9934	-0.00879738
0.60792	-38.65	-21.8626	-0.00874503
0.60796	-81.01	-21.7274	-0.00869096
0.608	-54.08	-21.5879	-0.00863515
0.60804	-60.52	-21.4441	-0.00857762
0.60808	-49.95	-21.2959	-0.00851837
0.60812	-38.88	-21.1435	-0.00845741
0.60816	-43.53	-20.9869	-0.00839475
0.6082	-31.48	-20.826	-0.00833041
0.60824	-23.1	-20.6611	-0.00826443
0.60828	-38.18	-20.492	-0.00819681
0.60832	-33.5	-20.319	-0.0081276
0.60836	21.79	-20.142	-0.00805681
0.6084	29.97	-19.9612	-0.00798447
0.60844	38.72	-19.7765	-0.00791061
0.60848	0.05273	-19.5881	-0.00783523
0.60852	-27.11	-19.3959	-0.00775836
0.60856	-109.6	-19.2	-0.00767999
0.6086	-122	-19.0004	-0.00760014
0.60864	-59.51	-18.7971	-0.00751882
0.60868	-32.95	-18.5902	-0.00743607
0.60872	18.38	-18.3798	-0.00735193
0.60876	35.11	-18.1661	-0.00726643
0.6088	14.5	-17.949	-0.00717961
0.60884	24.94	-17.7288	-0.0070915
0.60888	-1.277	-17.5053	-0.00700214
0.60892	-44.4	-17.2788	-0.00691153
0.60896	-36.22	-17.0492	-0.0068197
0.609	3.752	-16.8166	-0.00672666
0.60904	-17	-16.5811	-0.00663244
0.60908	-12	-16.3426	-0.00653705
0.60912	-29.57	-16.1013	-0.00644051
0.60916	-43.79	-15.8571	-0.00634285
0.6092	-44.08	-15.6102	-0.00624408
0.60924	-5.467	-15.3606	-0.00614424
0.60928	-2.78	-15.1084	-0.00604334
0.60932	-15.21	-14.8536	-0.00594142
0.60936	35.51	-14.5963	-0.0058385
0.6094	75.69	-14.3365	-0.00573461
0.60944	42.42	-14.0744	-0.00562976
0.60948	3.579	-13.8099	-0.00552395
0.60952	-56.97	-13.543	-0.00541719
0.60956	-74.74	-13.2737	-0.00530947
0.6096	-79.11	-13.002	-0.00520079
0.60964	-66.94	-12.7279	-0.00509116
0.60968	-18.36	-12.4515	-0.00498061
0.60972	28.17	-12.1729	-0.00486914
0.60976	58.58	-11.892	-0.0047568
0.6098	18.9	-11.609	-0.0046436
0.60984	27.51	-11.3239	-0.00452955
0.60988	-8.531	-11.0366	-0.00441466
0.60992	-21.13	-10.7473	-0.00429893
0.60996	-6.566	-10.4559	-0.00418236
0.61	-7.462	-10.1624	-0.00406496
0.61004	-24.14	-9.86682	-0.00394673
0.61008	-13.36	-9.56914	-0.00382766
0.61012	-22.17	-9.26939	-0.00370776
0.61016	-53.65	-8.96758	-0.00358703
0.6102	-60.38	-8.66371	-0.00346548
0.61024	-65.99	-8.35782	-0.00334313
0.61028	-11.33	-8.04997	-0.00321999
0.61032	34.91	-7.74023	-0.00309609
0.61036	44.13	-7.42865	-0.00297146
0.6104	25.63	-7.1153	-0.00284612
0.61044	40.69	-6.80021	-0.00272009
0.61048	-6.652	-6.48342	-0.00259337
0.61052	-37.06	-6.16493	-0.00246597
0.61056	-54.66	-5.84477	-0.00233791
0.6106	-49.25	-5.52294	-0.00220918
0.61064	-10.76	-5.19949	-0.0020798
0.61068	40.66	-4.87447	-0.00194979
0.61072	32.08	-4.54793	-0.00181917
0.61076	67.16	-4.2199	-0.00168796
0.6108	19.45	-3.89042	-0.00155617
0.61084	-2.086	-3.55947	-0.00142379
0.61088	-24.69	-3.22706	-0.00129082
0.61092	-25.84	-2.89317	-0.00115727
0.61096	7.74	-2.5578	-0.00102312
0.611	29.91	-2.22096	-0.000888382
0.61104	65.25	-1.88262	-0.00075305
0.61108	15.95	-1.54279	-0.000617117
0.61112	11.61	-1.20143	-0.00048057
0.61116	-30.55	-0.858483	-0.000343393
0.6112	-32.49	-0.513919	-0.000205568
0.61124	-19.28	-0.167696	-6.70783e-05
0.61128	5.255	0.180216	7.20863e-05
0.61132	52.33	0.52984	0.000211936
0.61136	51.7	0.881205	0.000352482
0.6114	21.44	1.23435	0.000493741
0.61144	-1.103	1.58934	0.000635736
0.61148	-48.96	1.94623	0.000778492
0.61152	-45.35	2.30509	0.000922035
0.61156	-34.34	2.66596	0.00106638
0.6116	-9.658	3.02887	0.00121155
0.61164	37.94	3.39385	0.00135754
0.61168	53.2	3.76091	0.00150436
0.61172	58.52	4.13008	0.00165203
0.61176	39.04	4.50141	0.00180056
0.6118	16.12	4.87495	0.00194998
0.61184	-33.21	5.25078	0.00210031
0.61188	-37.43	5.62897	0.00225159
0.61192	-11.94	6.00959	0.00240384
0.61196	28	6.3927	0.00255708
0.612	43.14	6.77834	0.00271134
0.61204	27.34	7.16657	0.00286663
0.61208	1.469	7.55746	0.00302298
0.61212	-35.12	7.95107	0.00318043
0.61216	-23.96	8.34748	0.00333899
0.6122	-38.47	8.74672	0.00349869
0.61224	-10.44	9.14886	0.00365954
0.61228	62.94	9.55391	0.00382156
0.61232	69.21	9.9619	0.00398476
0.61236	60.54	10.3729	0.00414915
0.6124	42.1	10.7869	0.00431476
0.61244	-7.837	11.204	0.00448161
0.61248	-39.72	11.6244	0.00464974
0.61252	-38.76	12.048	0.00481919
0.61256	-16.71	12.4749	0.00498997
0.6126	-24.4	12.9053	0.00516211
0.61264	-10.32	13.3391	0.00533562
0.61268	-2.924	13.7763	0.00551051
0.61272	-1.999	14.217	0.00568678
0.61276	-16.74	14.6611	0.00586443
0.6128	-8.936	15.1087	0.00604347
0.61284	11.3	15.5597	0.00622388
0.61288	45.63	16.0141	0.00640565
0.61292	70.05	16.4719	0.00658878
0.61296	91.58	16.9331	0.00677326
0.613	51.55	17.3977	0.00695909
0.61304	-0.005073	17.8657	0.00714629
0.61308	-85.99	18.3372	0.00733487
0.61312	-133.3	18.8121	0.00752484
0.61316	-121.4	19.2905	0.0077162
0.6132	-99.31	19.7723	0.00790892
0.61324	-56.16	20.2574	0.00810296
0.61328	39.88	20.7456	0.00829826
0.61332	64.7	21.2368	0.00849473
0.61336	66.73	21.7308	0.00869232
0.6134	76.9	22.2274	0.00889096
0.61344	56.03	22.7264	0.00909057
0.61348	22.25	23.2278	0.00929112
0.61352	32.51	23.7314	0.00949254
0.61356	36.58	24.237	0.0096948
0.6136	9.503	24.7446	0.00989785
0.61364	39.65	25.2541	0.0101016
0.61368	41.01	25.7653	0.0103061
0.61372	-9.687	26.2781	0.0105113
0.61376	-6.884	26.7925	0.010717
0.6138	3.925	27.3083	0.0109233
0.61384	-5.612	27.8254	0.0111301
0.61388	43.66	28.3435	0.0113374
0.61392	92.05	28.8627	0.0115451
0.61396	79.94	29.3827	0.0117531
0.614	35.83	29.9035	0.0119614
0.61404	37.8	30.4249	0.0121699
0.61408	-36.68	30.9467	0.0123787
0.61412	-87.52	31.469	0.0125876
0.61416	-100.6	31.9916	0.0127966
0.6142	-80.7	32.5142	0.0130057
0.61424	-12.35	33.0367	0.0132147
0.61428	38.69	33.5588	0.0134235
0.61432	39.85	34.0803	0.0136321
0.61436	32.39	34.6008	0.0138403
0.6144	54.99	35.1201	0.014048
0.61444	22.31	35.6379	0.0142552
0.61448	0.5151	36.1539	0.0144615
0.61452	-19.69	36.6678	0.0146671
0.61456	-15.64	37.1793	0.0148717
0.6146	4.59	37.6881	0.0150752
0.61464	4.243	38.1939	0.0152775
0.61468	-21.31	38.6963	0.0154785
0.61472	-40.58	39.1949	0.015678
0.61476	-26.42	39.6894	0.0158757
0.6148	-42.29	40.1793	0.0160717
0.61484	-15	40.6641	0.0162657
0.61488	25.08	41.1435	0.0164574
0.61492	54.3	41.6169	0.0166468
0.61496	28.46	42.0838	0.0168335
0.615	20.63	42.5436	0.0170175
0.61504	16.79	42.996	0.0171984
0.61508	-25.9	43.4403	0.0173761
0.61512	-24.89	43.876	0.0175504
0.61516	-20.44	44.3026	0.017721
0.6152	-18.15	44.7194	0.0178878
0.61524	-9.86	45.1259	0.0180504
0.61528	12.88	45.5215	0.0182086
0.61532	23.14	45.9054	0.0183622
0.61536	74.76	46.2771	0.0185108
0.6154	22.71	46.6357	0.0186543
0.61544	-8.502	46.9808	0.0187923
0.61548	6.151	47.3115	0.0189246
0.61552	36.38	47.6272	0.0190509
0.61556	88.98	47.9272	0.0191709
0.6156	42.8	48.2107	0.0192843
0.61564	54.04	48.4771	0.0193908
0.61568	25.57	48.7256	0.0194903
0.61572	25.46	48.9556	0.0195822
0.61576	-22.89	49.1663	0.0196665
0.6158	-128.5	49.3569	0.0197428
0.61584	-40.44	49.5268	0.0198107
0.61588	29.68	49.6751	0.01987
0.61592	26.9	49.8009	0.0199204
0.61596	9.908	49.9034	0.0199614
0.616	51.99	49.9818	0.0199927
0.61604	114.9	50.035	0.020014
0.61608	64.53	50.0624	0.0200249
0.61612	93.49	50.0629	0.0200252
0.61616	95.54	50.0357	0.0200143
0.6162	72.1	49.98	0.019992
0.61624	92.94	49.895	0.019958
0.61628	73.23	49.7798	0.0199119
0.61632	149.5	49.6336	0.0198535
0.61636	246	49.4558	0.0197823
0.6164	310.2	49.2454	0.0196982
0.61644	312	49.002	0.0196008
0.61648	434.8	48.7248	0.0194899
0.61652	533.5	48.4136	0.0193654
0.61656	542.6	48.0679	0.0192272
0.6166	531.5	47.6877	0.0190751
0.61664	526.3	47.273	0.0189092
0.61668	472.8	46.8242	0.0187297
0.61672	437.1	46.3417	0.0185367
0.61676	335.3	45.8262	0.0183305
0.6168	254.5	45.2783	0.0181113
0.61684	244.1	44.699	0.0178796
0.61688	220	44.0893	0.0176357
0.61692	99.7	43.4502	0.0173801
0.61696	37.51	42.783	0.0171132
0.617	119.3	42.0886	0.0168354
0.61704	117.5	41.3684	0.0165473
0.61708	-36.28	40.6234	0.0162494
0.61712	-15.03	39.855	0.015942
0.61716	22.62	39.0642	0.0156257
0.6172	-80.12	38.2523	0.0153009
0.61724	-17.52	37.4204	0.0149682
0.61728	60.37	36.5697	0.0146279
0.61732	68.43	35.7012	0.0142805
0.61736	70.2	34.816	0.0139264
0.6174	86.18	33.9154	0.0135662
0.61744	-35	33.0004	0.0132002
0.61748	-58.41	32.0721	0.0128288
0.61752	-33.53	31.1317	0.0124527
0.61756	-99.25	30.1803	0.0120721
0.6176	-13.94	29.2188	0.0116875
0.61764	72.77	28.2485	0.0112994
0.61768	11.96	27.2702	0.0109081
0.61772	12.94	26.2849	0.010514
0.61776	12.74	25.2937	0.0101175
0.6178	10.8	24.2976	0.00971905
0.61784	60.66	23.2976	0.00931903
0.61788	108	22.2946	0.00891785
0.61792	109.6	21.2897	0.00851589
0.61796	128.5	20.284	0.00811359
0.618	46.12	19.2784	0.00771137
0.61804	-40.5	18.2742	0.00730967
0.61808	-75.55	17.2724	0.00690895
0.61812	-97.26	16.2741	0.00650963
0.61816	-132.5	15.2804	0.00611215
0.6182	-82.78	14.2923	0.00571691
0.61824	37.34	13.3108	0.0053243
0.61828	-5.641	12.3368	0.00493471
0.61832	3.897	11.3712	0.0045485
0.61836	11.06	10.4151	0.00416604
0.6184	41.53	9.46928	0.00378771
0.61844	-1.566	8.5347	0.00341388
0.61848	-4.225	7.61231	0.00304492
0.61852	58.43	6.70303	0.00268121
0.61856	-55.06	5.8078	0.00232312
0.6186	-34.34	4.92756	0.00197102
0.61864	-34.46	4.06323	0.00162529
0.61868	-89.43	3.21573	0.00128629
0.61872	-103	2.38594	0.000954376
0.61876	-44.77	1.57472	0.000629887
0.6188	-105.8	0.782887	0.000313155
0.61884	-131.6	0.0112381	4.49522e-06
0.61888	-92.32	-0.739479	-0.000295792
0.61892	-100.7	-1.46856	-0.000587422
0.61896	-168	-2.17533	-0.000870131
0.619	-138.3	-2.85918	-0.00114367
0.61904	-134.5	-3.51954	-0.00140782
0.61908	-192.5	-4.15592	-0.00166237
0.61912	-178.6	-4.76785	-0.00190714
0.61916	-200.7	-5.35497	-0.00214199
0.6192	-225.4	-5.91697	-0.00236679
0.61924	-202.4	-6.45362	-0.00258145
0.61928	-174	-6.96476	-0.00278591
0.61932	-201	-7.45034	-0.00298014
0.61936	-162	-7.91036	-0.00316414
0.6194	-210.2	-8.34488	-0.00333795
0.61944	-252.5	-8.75405	-0.00350162
0.61948	-204.2	-9.13811	-0.00365524
0.61952	-207.7	-9.49736	-0.00379894
0.61956	-215.8	-9.8322	-0.00393288
0.6196	-218.2	-10.1431	-0.00405724
0.61964	-197.9	-10.4306	-0.00417225
0.61968	-189.7	-10.6954	-0.00427816
0.61972	-199.9	-10.9381	-0.00437526
0.61976	-189.7	-11.1596	-0.00446386
0.6198	-179.5	-11.3608	-0.00454431
0.61984	-171.8	-11.5424	-0.00461697
0.61988	-154.7	-11.7056	-0.00468225
0.61992	-81.88	-11.8514	-0.00474058
0.61996	-83.93	-11.981	-0.00479238
0.62	-53.21	-12.0953	-0.00483813
0.62004	-0.323	-12.1957	-0.0048783
0.62008	34.85	-12.2834	-0.00491334
0.62012	116.7	-12.3594	-0.00494375
0.62016	155.5	-12.4249	-0.00496997
0.6202	177	-12.4812	-0.00499246
0.62024	209.5	-12.5291	-0.00501163
0.62028	226.9	-12.5697	-0.00502787
0.62032	222.2	-12.6039	-0.00504154
0.62036	252.3	-12.6324	-0.00505295
0.6204	215.8	-12.6559	-0.00506237
0.62044	211.1	-12.6751	-0.00507005
0.62048	217.2	-12.6905	-0.0050762
0.62052	214.4	-12.7024	-0.00508096
0.62056	210.9	-12.7112	-0.00508447
0.6206	198.7	-12.7171	-0.00508683
0.62064	192.5	-12.7202	-0.00508809
0.62068	139.7	-12.7207	-0.00508827
0.62072	106.3	-12.7184	-0.00508737
0.62076	75.37	-12.7134	-0.00508535
0.6208	32.83	-12.7054	-0.00508217
0.62084	-12.81	-12.6944	-0.00507776
0.62088	-35.5	-12.6801	-0.00507204
0.62092	-106.4	-12.6624	-0.00506495
0.62096	-105.8	-12.641	-0.00505642
0.621	-107.4	-12.616	-0.00504639
0.62104	-115.4	-12.587	-0.00503482
0.62108	-138.5	-12.5542	-0.00502169
0.62112	-128.2	-12.5174	-0.00500698
0.62116	-131.9	-12.4768	-0.00499071
0.6212	-128.6	-12.4323	-0.0049729
0.62124	-136	-12.384	-0.00495361
0.62128	-103.5	-12.3322	-0.0049329
0.62132	-111.7	-12.2771	-0.00491084
0.62136	-108.1	-12.2189	-0.00488756
0.6214	-89.28	-12.1579	-0.00486315
0.62144	-65.18	-12.0944	-0.00483775
0.62148	-49.77	-12.0288	-0.0048115
0.62152	-52.08	-11.9614	-0.00478456
0.62156	-17.03	-11.8927	-0.00475708
0.6216	-15.55	-11.8231	-0.00472922
0.62164	-0.2363	-11.7529	-0.00470115
0.62168	17.91	-11.6826	-0.00467304
0.62172	23	-11.6126	-0.00464504
0.62176	26.67	-11.5433	-0.00461732
0.6218	10.17	-11.4751	-0.00459003
0.62184	17.57	-11.4083	-0.00456332
0.62188	7.365	-11.3433	-0.00453733
0.62192	31.15	-11.2805	-0.00451221
0.62196	37.19	-11.2202	-0.00448809
0.622	1.411	-11.1627	-0.0044651
0.62204	46.01	-11.1084	-0.00444336
0.62208	73.98	-11.0575	-0.00442299
0.62212	54.65	-11.0103	-0.00440411
0.62216	65.05	-10.967	-0.0043868
0.6222	73.95	-10.9279	-0.00437116
0.62224	57.39	-10.8932	-0.00435726
0.62228	53.72	-10.8629	-0.00434517
0.62232	46.18	-10.8373	-0.00433493
0.62236	38.09	-10.8165	-0.00432659
0.6224	37.22	-10.8004	-0.00432018
0.62244	17.8	-10.7893	-0.00431572
0.62248	16.84	-10.7831	-0.00431322
0.62252	11.73	-10.7818	-0.00431271
0.62256	31.9	-10.7855	-0.00431418
0.6226	15.86	-10.7941	-0.00431765
0.62264	-4.311	-10.8078	-0.0043231
0.62268	-12.52	-10.8263	-0.00433053
0.62272	-19.02	-10.8499	-0.00433994
0.62276	-4.889	-10.8783	-0.00435131
0.6228	-0.06288	-10.9116	-0.00436464
0.62284	-9.716	-10.9498	-0.00437991
0.62288	-8.184	-10.9928	-0.00439713
0.62292	9.677	-11.0407	-0.00441627
0.62296	8.174	-11.0933	-0.00443732
0.623	-14.2	-11.1507	-0.00446029
0.62304	-4.629	-11.2128	-0.00448513
0.62308	-0.5831	-11.2796	-0.00451185
0.62312	-6.768	-11.3511	-0.00454042
0.62316	-3.069	-11.4271	-0.00457083
0.6232	12.16	-11.5076	-0.00460304
0.62324	-4.976	-11.5926	-0.00463705
0.62328	-1.161	-11.6821	-0.00467283
0.62332	10.72	-11.7759	-0.00471034
0.62336	-6.017	-11.8739	-0.00474957
0.6234	-19.8	-11.9762	-0.00479048
0.62344	-7.808	-12.0826	-0.00483304
0.62348	1.787	-12.193	-0.00487721
0.62352	-16.68	-12.3074	-0.00492298
0.62356	-4.225	-12.4257	-0.0049703
0.6236	-13.16	-12.5478	-0.00501913
0.62364	-0.09178	-12.6736	-0.00506945
0.62368	4.937	-12.8031	-0.00512122
0.62372	-22.37	-12.936	-0.00517441
0.62376	-0.9299	-13.0724	-0.00522896
0.6238	-5.814	-13.2121	-0.00528486
0.62384	-5.959	-13.3551	-0.00534205
0.62388	-3.444	-13.5012	-0.00540049
0.62392	-18.73	-13.6504	-0.00546015
0.62396	8.174	-13.8024	-0.00552098
0.624	1.874	-13.9573	-0.00558293
0.62404	-5.063	-14.1149	-0.00564597
0.62408	-6.508	-14.2751	-0.00571003
0.62412	4.561	-14.4377	-0.00577508
0.62416	-7.779	-14.6026	-0.00584105
0.6242	-25.52	-14.7697	-0.0059079
0.62424	-9.34	-14.9389	-0.00597556
0.62428	-27.09	-15.11	-0.006044
0.62432	-15.96	-15.2828	-0.00611314
0.62436	-19.83	-15.4573	-0.00618294
0.6244	-5.641	-15.6333	-0.00625334
0.62444	-6.739	-15.8107	-0.00632429
0.62448	10.89	-15.9894	-0.00639575
0.62452	15.08	-16.1691	-0.00646764
0.62456	14.56	-16.3498	-0.00653991
0.6246	2.972	-16.5312	-0.0066125
0.62464	4.272	-16.7133	-0.00668533
0.62468	3.376	-16.8959	-0.00675834
0.62472	-19.48	-17.0786	-0.00683145
0.62476	-27.49	-17.2614	-0.00690458
0.6248	-9.774	-17.4441	-0.00697765
0.62484	-31.88	-17.6265	-0.00705059
0.62488	-9.716	-17.8083	-0.00712331
0.62492	3.868	-17.9894	-0.00719575
0.62496	-1.392	-18.1695	-0.00726781
0.625	10.8	-18.3486	-0.00733943
0.62504	30.17	-18.5263	-0.00741051
0.62508	11.58	-18.7024	-0.00748097
0.62512	-25.58	-18.8768	-0.00755071
0.62516	-23.59	-19.0491	-0.00761963
0.6252	-2.057	-19.2191	-0.00768764
0.62524	-22.95	-19.3866	-0.00775463
0.62528	-64.08	-19.5513	-0.00782051
0.62532	-85.96	-19.7129	-0.00788517
0.62536	-45.21	-19.8713	-0.00794852
0.6254	-100.4	-20.0262	-0.00801047
0.62544	-75.7	-20.1774	-0.00807096
0.62548	-30.58	-20.3248	-0.00812991
0.62552	1.613	-20.4681	-0.00818726
0.62556	11.15	-20.6074	-0.00824295
0.6256	-6.508	-20.7423	-0.00829692
0.62564	-55.15	-20.8728	-0.00834911
0.62568	-47.81	-20.9986	-0.00839946
0.62572	-55.81	-21.1197	-0.0084479
0.62576	-74.05	-21.2359	-0.00849437
0.6258	-67.75	-21.3471	-0.00853883
0.62584	-47.92	-21.4531	-0.00858123
0.62588	-73.24	-21.5538	-0.00862153
0.62592	-53.27	-21.6493	-0.00865971
0.62596	-74.05	-21.7394	-0.00869574
0.626	-0.1785	-21.824	-0.0087296
0.62604	12.48	-21.9032	-0.00876128
0.62608	-33.36	-21.9769	-0.00879076
0.62612	-6.739	-22.0451	-0.00881803
0.62616	-23.59	-22.1076	-0.00884306
0.6262	-49.72	-22.1646	-0.00886584
0.62624	-61.39	-22.2159	-0.00888636
0.62628	-63.85	-22.2615	-0.00890459
0.62632	-16.88	-22.3013	-0.00892053
0.62636	-12.11	-22.3354	-0.00893418
0.6264	-36.74	-22.3638	-0.00894553
0.62644	-38.1	-22.3864	-0.00895457
0.62648	-3.762	-22.4033	-0.00896131
0.62652	41.53	-22.4143	-0.00896574
0.62656	-25.44	-22.4196	-0.00896786
0.6266	-6.537	-22.4191	-0.00896765
0.62664	-55.35	-22.4128	-0.00896512
0.62668	-51.82	-22.4006	-0.00896023
0.62672	-66.07	-22.3825	-0.00895299
0.62676	-66.07	-22.3585	-0.00894339
0.6268	-101.8	-22.3286	-0.00893143
0.62684	-54.4	-22.2928	-0.00891712
0.62688	-32.81	-22.2512	-0.00890049
0.62692	-13.21	-22.2039	-0.00888155
0.62696	37.65	-22.1508	-0.00886033
0.627	40.43	-22.0921	-0.00883686
0.62704	52.88	-22.0279	-0.00881115
0.62708	-6.219	-21.958	-0.00878321
0.62712	-10.7	-21.8826	-0.00875304
0.62716	-82.92	-21.8016	-0.00872063
0.6272	-74.51	-21.715	-0.00868599
0.62724	-61.59	-21.6228	-0.0086491
0.62728	-113.1	-21.525	-0.00860998
0.62732	-79.63	-21.4216	-0.00856865
0.62736	-41.16	-21.3128	-0.00852514
0.6274	-13.16	-21.1987	-0.00847947
0.62744	-3.329	-21.0793	-0.0084317
0.62748	-28.21	-20.9547	-0.00838187
0.62752	70.92	-20.825	-0.00833001
0.62756	-11.57	-20.6904	-0.00827615
0.6276	6.642	-20.5508	-0.00822034
0.62764	-22.35	-20.4064	-0.00816258
0.62768	-83.76	-20.2573	-0.00810291
0.62772	-39.66	-20.1033	-0.00804134
0.62776	-71.3	-19.9448	-0.0079779
0.6278	-96.36	-19.7816	-0.00791264
0.62784	-90.12	-19.614	-0.00784558
0.62788	-48.91	-19.442	-0.00777679
0.62792	-28.62	-19.2658	-0.00770633
0.62796	7.451	-19.0857	-0.00763426
0.628	40.28	-18.9016	-0.00756065
0.62804	44.59	-18.7139	-0.00748557
0.62808	48.98	-18.5227	-0.00740907
0.62812	6.411	-18.328	-0.0073312
0.62816	18.14	-18.13	-0.007252
0.6282	-46.54	-17.9287	-0.0071715
0.62824	-73.96	-17.7243	-0.00708973
0.62828	-104.7	-17.5168	-0.00700673
0.62832	-101.9	-17.3063	-0.00692253
0.62836	-87.32	-17.093	-0.0068372
0.6284	-36.42	-16.877	-0.00675079
0.62844	24.68	-16.6585	-0.00666339
0.62848	83.32	-16.4377	-0.00657507
0.62852	84.33	-16.2147	-0.00648589
0.62856	94.21	-15.9898	-0.00639593
0.6286	66.67	-15.7631	-0.00630522
0.62864	9.532	-15.5345	-0.00621379
0.62868	-37.69	-15.3041	-0.00612166
0.62872	-60.93	-15.0721	-0.00602883
0.62876	-63.01	-14.8383	-0.00593533
0.6288	-42.69	-14.6029	-0.00584117
0.62884	-23.27	-14.366	-0.00574638
0.62888	-27.69	-14.1275	-0.00565099
[truncated: 23,003 more rows]

## Sheet: Sheet2
0.76952	21.15	0.393573	0.000157429
0.76956	25.34	1.26697	0.000506786
0.7696	48.78	2.1545	0.000861802
0.76964	36.12	3.0563	0.00122252
0.76968	19.45	3.97246	0.00158898
0.76972	12.83	4.90313	0.00196125
0.76976	3.694	5.84845	0.00233938
0.7698	-0.7276	6.80855	0.00272342
0.76984	-22.43	7.78357	0.00311343
0.76988	16.58	8.77367	0.00350947
0.76992	-5.843	9.77896	0.00391158
0.76996	27.54	10.7996	0.00431983
0.77	54.94	11.8356	0.00473426
0.77004	20.95	12.8873	0.00515493
0.77008	41.96	13.9547	0.00558189
0.77012	45.49	15.038	0.00601521
0.77016	23.93	16.1374	0.00645495
0.7702	3.983	17.2529	0.00690118
0.77024	23.38	18.3849	0.00735397
0.77028	20.14	19.5335	0.00781339
0.77032	-4.543	20.6988	0.00827951
0.77036	-7.028	21.881	0.00875241
0.7704	32.97	23.0803	0.00923214
0.77044	26.9	24.2969	0.00971876
0.77048	46.58	25.5309	0.0102124
0.77052	42.48	26.7824	0.010713
0.77056	41.9	28.0517	0.0112207
0.7706	66.61	29.3389	0.0117355
0.77064	49.01	30.6441	0.0122577
0.77068	48.81	31.9677	0.0127871
0.77072	25.17	33.3097	0.0133239
0.77076	16.93	34.6704	0.0138682
0.7708	11.64	36.0501	0.01442
0.77084	3.665	37.4487	0.0149795
0.77088	22.13	38.8667	0.0155467
0.77092	-11.22	40.3041	0.0161216
0.77096	30.75	41.7611	0.0167045
0.771	48.14	43.2379	0.0172952
0.77104	42.48	44.7346	0.0178938
0.77108	40.49	46.2513	0.0185005
0.77112	43.84	47.7883	0.0191153
0.77116	27.86	49.3455	0.0197382
0.7712	15.4	50.9233	0.0203693
0.77124	36.73	52.5216	0.0210087
0.77128	39.21	54.1407	0.0216563
0.77132	29.94	55.7806	0.0223123
0.77136	37.91	57.4415	0.0229766
0.7714	26.41	59.1234	0.0236493
0.77144	30.37	60.8264	0.0243305
0.77148	14.91	62.5505	0.0250202
0.77152	31.41	64.296	0.0257184
0.77156	57.48	66.0627	0.0264251
0.7716	60.08	67.8508	0.0271403
0.77164	49.13	69.6602	0.0278641
0.77168	68.32	71.491	0.0285964
0.77172	77.65	73.3432	0.0293373
0.77176	72.59	75.2168	0.0300867
0.7718	72.22	77.1118	0.0308447
0.77184	55.25	79.0283	0.0316113
0.77188	64.47	80.9662	0.0323865
0.77192	68.95	82.9256	0.0331702
0.77196	89.47	84.9064	0.0339625
0.772	74.65	86.9086	0.0347634
0.77204	91.29	88.9323	0.0355729
0.77208	87.33	90.9774	0.0363909
0.77212	75.54	93.0439	0.0372175
0.77216	76.03	95.1318	0.0380527
0.7722	73.29	97.241	0.0388964
0.77224	78.4	99.3716	0.0397487
0.77228	54.3	101.524	0.0406094
0.77232	93.49	103.697	0.0414787
0.77236	98.43	105.891	0.0423564
0.7724	82.65	108.107	0.0432426
0.77244	71.76	110.343	0.0441372
0.77248	79.73	112.601	0.0450403
0.77252	71.03	114.879	0.0459516
0.77256	67.51	117.178	0.0468713
0.7726	66.76	119.498	0.0477992
0.77264	62.16	121.838	0.0487353
0.77268	71.44	124.199	0.0496795
0.77272	59.24	126.58	0.0506318
0.77276	58.69	128.98	0.0515921
0.7728	68.52	131.4	0.0525602
0.77284	74.1	133.84	0.053536
0.77288	105.1	136.299	0.0545196
0.77292	114.8	138.777	0.0555106
0.77296	98.52	141.273	0.056509
0.773	115.5	143.787	0.0575147
0.77304	69.53	146.319	0.0585275
0.77308	53.84	148.868	0.0595472
0.77312	25.72	151.434	0.0605737
0.77316	29.76	154.017	0.0616069
0.7732	49.04	156.616	0.0626465
0.77324	87.19	159.231	0.0636923
0.77328	92.16	161.86	0.064744
0.77332	94.15	164.504	0.0658016
0.77336	113.1	167.161	0.0668646
0.7734	98.92	169.832	0.0679328
0.77344	110.5	172.515	0.069006
0.77348	120.3	175.209	0.0700838
0.77352	122.5	177.915	0.071166
0.77356	134.6	180.631	0.0722522
0.7736	124.4	183.356	0.0733423
0.77364	67.13	186.089	0.0744357
0.77368	39.27	188.831	0.0755322
0.77372	29.68	191.579	0.0766315
0.77376	41.15	194.333	0.0777332
0.7738	60.57	197.092	0.0788368
0.77384	97.22	199.855	0.079942
0.77388	143.1	202.621	0.0810483
0.77392	139.5	205.388	0.0821552
0.77396	154.2	208.156	0.0832623
0.774	154.7	210.923	0.0843692
0.77404	123.2	213.688	0.0854752
0.77408	108.5	216.45	0.0865799
0.77412	102.6	219.207	0.0876829
0.77416	117.6	221.959	0.0887835
0.7742	96.99	224.703	0.0898812
0.77424	95.98	227.439	0.0909755
0.77428	80.34	230.164	0.0920657
0.77432	109.2	232.878	0.0931513
0.77436	117.5	235.579	0.0942316
0.7744	144.5	238.265	0.095306
0.77444	159.5	240.934	0.0963738
0.77448	162.3	243.586	0.0974343
0.77452	190.2	246.217	0.0984868
0.77456	167.4	248.827	0.0995307
0.7746	164.5	251.413	0.100565
0.77464	168.9	253.974	0.101589
0.77468	152	256.507	0.102603
0.77472	137.3	259.012	0.103605
0.77476	130.1	261.485	0.104594
0.7748	122.5	263.926	0.10557
0.77484	119.4	266.331	0.106532
0.77488	151.8	268.699	0.10748
0.77492	142.5	271.028	0.108411
0.77496	154.8	273.315	0.109326
0.775	173.1	275.559	0.110223
0.77504	180.3	277.756	0.111102
0.77508	194.6	279.905	0.111962
0.77512	199.2	282.003	0.112801
0.77516	224.9	284.048	0.113619
0.7752	208.3	286.037	0.114415
0.77524	226.3	287.968	0.115187
0.77528	282.5	289.838	0.115935
0.77532	316.3	291.646	0.116658
0.77536	332.2	293.387	0.117355
0.7754	344.6	295.06	0.118024
0.77544	521.5	296.663	0.118665
0.77548	892.5	298.192	0.119277
0.77552	1261	299.646	0.119858
0.77556	1563	301.023	0.120409
0.7756	1792	302.319	0.120928
0.77564	1994	303.536	0.121414
0.77568	2026	304.671	0.121868
0.77572	1940	305.725	0.12229
0.77576	1825	306.699	0.12268
0.7758	1679	307.593	0.123037
0.77584	1510	308.411	0.123364
0.77588	1282	309.153	0.123661
0.77592	964.8	309.823	0.123929
0.77596	681	310.425	0.12417
0.776	473.2	310.962	0.124385
0.77604	250.7	311.438	0.124575
0.77608	89.59	311.856	0.124742
0.77612	57.13	312.22	0.124888
0.77616	53.92	312.534	0.125014
0.7762	26.79	312.802	0.125121
0.77624	58.61	313.027	0.125211
0.77628	69.13	313.212	0.125285
0.77632	13.41	313.361	0.125344
0.77636	-64.54	313.477	0.125391
0.7764	-101.4	313.563	0.125425
0.77644	-96.01	313.623	0.125449
0.77648	-71.25	313.657	0.125463
0.77652	-53.62	313.67	0.125468
0.77656	-35.96	313.664	0.125466
0.7766	-16.51	313.641	0.125457
0.77664	-14.95	313.604	0.125441
0.77668	-4.889	313.553	0.125421
0.77672	9.503	313.492	0.125397
0.77676	-12.66	313.422	0.125369
0.7768	10.17	313.344	0.125338
0.77684	84.18	313.26	0.125304
0.77688	89.47	313.172	0.125269
0.77692	79.88	313.081	0.125232
0.77696	68.09	312.988	0.125195
0.777	31.35	312.894	0.125157
0.77704	72.54	312.8	0.12512
0.77708	111.8	312.707	0.125083
0.77712	125.4	312.616	0.125047
0.77716	119	312.528	0.125011
0.7772	160.5	312.444	0.124977
0.77724	145.3	312.363	0.124945
0.77728	98.17	312.287	0.124915
0.77732	101	312.215	0.124886
0.77736	141.3	312.149	0.12486
0.7774	116.1	312.088	0.124835
0.77744	117	312.034	0.124813
0.77748	116.3	311.985	0.124794
0.77752	96.84	311.942	0.124777
0.77756	120	311.905	0.124762
0.7776	101	311.874	0.12475
0.77764	48.87	311.849	0.12474
0.77768	102.7	311.83	0.124732
0.77772	119.8	311.815	0.124726
0.77776	97.62	311.805	0.124722
0.7778	98.95	311.799	0.12472
0.77784	123.6	311.797	0.124719
0.77788	102.4	311.797	0.124719
0.77792	135.3	311.8	0.12472
0.77796	168.2	311.803	0.124721
0.778	126.8	311.807	0.124723
0.77804	163.5	311.81	0.124724
0.77808	238.9	311.812	0.124725
0.77812	327.2	311.811	0.124724
0.77816	462.5	311.805	0.124722
0.7782	629.4	311.795	0.124718
0.77824	779	311.778	0.124711
0.77828	928.7	311.755	0.124702
0.77832	1020	311.723	0.124689
0.77836	1044	311.683	0.124673
0.7784	1086	311.635	0.124654
0.77844	1082	311.578	0.124631
0.77848	1043	311.513	0.124605
0.77852	936.7	311.441	0.124576
0.77856	866.1	311.362	0.124545
0.7786	700.2	311.278	0.124511
0.77864	558	311.19	0.124476
0.77868	380.8	311.1	0.12444
0.77872	231.4	311.009	0.124404
0.77876	91.47	310.919	0.124368
0.7788	8.29	310.832	0.124333
0.77884	-18.21	310.749	0.1243
0.77888	-35.87	310.672	0.124269
0.77892	10.8	310.602	0.124241
0.77896	30.17	310.54	0.124216
0.779	59.79	310.487	0.124195
0.77904	106.2	310.445	0.124178
0.77908	122.1	310.414	0.124166
0.77912	133.7	310.395	0.124158
0.77916	99.01	310.389	0.124156
0.7792	57.88	310.397	0.124159
0.77924	17.77	310.418	0.124167
0.77928	13.9	310.454	0.124182
0.77932	-10.38	310.504	0.124202
0.77936	-28.33	310.57	0.124228
0.7794	-5.785	310.65	0.12426
0.77944	24.85	310.746	0.124298
0.77948	31.96	310.857	0.124343
0.77952	63.69	310.982	0.124393
0.77956	119.8	311.121	0.124449
0.7796	172.2	311.275	0.12451
0.77964	211.3	311.441	0.124576
0.77968	264.3	311.62	0.124648
0.77972	320.3	311.811	0.124724
0.77976	322.6	312.013	0.124805
0.7798	346.9	312.226	0.124891
0.77984	340.8	312.449	0.12498
0.77988	353	312.682	0.125073
0.77992	410.9	312.923	0.125169
0.77996	448.7	313.172	0.125269
0.78	477.9	313.428	0.125371
0.78004	537.1	313.692	0.125477
0.78008	505.2	313.962	0.125585
0.78012	512.6	314.238	0.125695
0.78016	543.6	314.52	0.125808
0.7802	558.9	314.807	0.125923
0.78024	583	315.1	0.12604
0.78028	629.1	315.399	0.126159
0.78032	618.2	315.702	0.126281
0.78036	634.1	316.012	0.126405
0.7804	581.5	316.328	0.126531
0.78044	552.3	316.65	0.12666
0.78048	519.9	316.979	0.126792
0.78052	492.8	317.316	0.126926
0.78056	444	317.661	0.127064
0.7806	419.4	318.015	0.127206
0.78064	365.3	318.38	0.127352
0.78068	248	318.755	0.127502
0.78072	214.1	319.142	0.127657
0.78076	154.5	319.541	0.127817
0.7808	103.7	319.954	0.127982
0.78084	59.65	320.382	0.128153
0.78088	59.53	320.824	0.128329
0.78092	5.717	321.281	0.128513
0.78096	19.3	321.755	0.128702
0.781	45.49	322.245	0.128898
0.78104	12.57	322.751	0.1291
0.78108	99.18	323.274	0.12931
0.78112	98.61	323.813	0.129525
0.78116	132.1	324.37	0.129748
0.7812	164.3	324.942	0.129977
0.78124	151.7	325.531	0.130212
0.78128	90.69	326.135	0.130454
0.78132	84.44	326.755	0.130702
0.78136	91.55	327.389	0.130956
0.7814	12.42	328.038	0.131215
0.78144	41.06	328.701	0.13148
0.78148	26.73	329.376	0.13175
0.78152	31.21	330.063	0.132025
0.78156	70.66	330.761	0.132305
0.7816	173.8	331.469	0.132588
0.78164	244.1	332.185	0.132874
0.78168	322.6	332.909	0.133163
0.78172	434	333.638	0.133455
0.78176	466.2	334.371	0.133748
0.7818	524.9	335.108	0.134043
0.78184	644.7	335.846	0.134338
0.78188	706.3	336.585	0.134634
0.78192	732.6	337.324	0.13493
0.78196	782.3	338.061	0.135224
0.782	786.4	338.796	0.135519
0.78204	770	339.529	0.135812
0.78208	725.2	340.259	0.136103
0.78212	667	340.985	0.136394
0.78216	603.9	341.708	0.136683
0.7822	564.7	342.427	0.136971
0.78224	536.8	343.143	0.137257
0.78228	476.2	343.856	0.137542
0.78232	386.9	344.566	0.137827
0.78236	343.3	345.274	0.13811
0.7824	286.1	345.98	0.138392
0.78244	223.9	346.684	0.138674
0.78248	180.8	347.387	0.138955
0.78252	211.7	348.089	0.139236
0.78256	224	348.79	0.139516
0.7826	273.9	349.491	0.139796
0.78264	339	350.191	0.140076
0.78268	337.1	350.891	0.140356
0.78272	361.5	351.591	0.140636
0.78276	404.2	352.29	0.140916
0.7828	421.5	352.99	0.141196
0.78284	436.6	353.689	0.141476
0.78288	464.9	354.389	0.141756
0.78292	488.4	355.09	0.142036
0.78296	493.1	355.791	0.142316
0.783	452.1	356.493	0.142597
0.78304	391.2	357.196	0.142878
0.78308	348.4	357.901	0.143161
0.78312	317.6	358.608	0.143443
0.78316	255.7	359.318	0.143727
0.7832	210.6	360.03	0.144012
0.78324	181	360.746	0.144298
0.78328	177.9	361.464	0.144586
0.78332	179	362.187	0.144875
0.78336	197.4	362.913	0.145165
0.7834	203.6	363.642	0.145457
0.78344	213.9	364.376	0.14575
0.78348	218.8	365.112	0.146045
0.78352	259	365.853	0.146341
0.78356	278.6	366.597	0.146639
0.7836	294.5	367.343	0.146937
0.78364	355.7	368.093	0.147237
0.78368	418	368.845	0.147538
0.78372	481.4	369.599	0.14784
0.78376	512.4	370.355	0.148142
0.7838	536.9	371.112	0.148445
0.78384	508.9	371.871	0.148749
0.78388	497.7	372.632	0.149053
0.78392	491	373.393	0.149357
0.78396	449.7	374.156	0.149662
0.784	435.2	374.92	0.149968
0.78404	407.7	375.685	0.150274
0.78408	383.1	376.452	0.150581
0.78412	336.3	377.22	0.150888
0.78416	300.1	377.99	0.151196
0.7842	292.2	378.761	0.151504
0.78424	242.2	379.534	0.151814
0.78428	246.6	380.309	0.152123
0.78432	273.5	381.085	0.152434
0.78436	301.1	381.862	0.152745
0.7844	332.5	382.641	0.153057
0.78444	357.9	383.422	0.153369
0.78448	393.8	384.203	0.153681
0.78452	446.1	384.985	0.153994
0.78456	466.3	385.768	0.154307
0.7846	502.7	386.551	0.15462
0.78464	538.6	387.335	0.154934
0.78468	580.6	388.119	0.155247
0.78472	604.5	388.903	0.155561
0.78476	616.4	389.687	0.155875
0.7848	606.9	390.472	0.156189
0.78484	575.5	391.258	0.156503
0.78488	542.5	392.044	0.156818
0.78492	496.4	392.832	0.157133
0.78496	452.5	393.621	0.157448
0.785	430.5	394.413	0.157765
0.78504	403.5	395.207	0.158083
0.78508	335.1	396.005	0.158402
0.78512	315	396.806	0.158722
0.78516	276.6	397.611	0.159045
0.7852	278.5	398.422	0.159369
0.78524	242.9	399.237	0.159695
0.78528	195	400.058	0.160023
0.78532	177.2	400.884	0.160354
0.78536	278	401.717	0.160687
0.7854	297.9	402.555	0.161022
0.78544	277	403.4	0.16136
0.78548	286.1	404.251	0.1617
0.78552	381.4	405.108	0.162043
0.78556	447	405.972	0.162389
0.7856	450.6	406.842	0.162737
0.78564	455	407.718	0.163087
0.78568	473.9	408.6	0.16344
0.78572	515.2	409.488	0.163795
0.78576	492.4	410.382	0.164153
0.7858	482	411.282	0.164513
0.78584	515.1	412.189	0.164875
0.78588	482.1	413.102	0.165241
0.78592	438.7	414.021	0.165608
0.78596	423	414.947	0.165979
0.786	419.9	415.88	0.166352
0.78604	449.4	416.821	0.166728
0.78608	430.4	417.768	0.167107
0.78612	417.4	418.723	0.167489
0.78616	420.1	419.686	0.167874
0.7862	460.4	420.657	0.168263
0.78624	459.5	421.636	0.168654
0.78628	453	422.623	0.169049
0.78632	473.7	423.619	0.169448
0.78636	445.4	424.624	0.16985
0.7864	502	425.638	0.170255
0.78644	443	426.662	0.170665
0.78648	431.2	427.695	0.171078
0.78652	426.6	428.739	0.171496
0.78656	432.3	429.793	0.171917
0.7866	377	430.858	0.172343
0.78664	315.1	431.934	0.172774
0.78668	295.7	433.022	0.173209
0.78672	258	434.121	0.173648
0.78676	310.1	435.232	0.174093
0.7868	267.2	436.355	0.174542
0.78684	225.7	437.491	0.174996
0.78688	218.9	438.638	0.175455
0.78692	238.9	439.797	0.175919
0.78696	270.8	440.969	0.176388
0.787	263.5	442.152	0.176861
0.78704	260.5	443.346	0.177338
0.78708	277	444.552	0.177821
0.78712	300.9	445.767	0.178307
0.78716	322.7	446.993	0.178797
0.7872	371.8	448.229	0.179292
0.78724	441.3	449.473	0.179789
0.78728	476.5	450.726	0.18029
0.78732	462.3	451.986	0.180794
0.78736	497.9	453.253	0.181301
0.7874	501.3	454.526	0.181811
0.78744	504.6	455.806	0.182322
0.78748	539.6	457.09	0.182836
0.78752	524.6	458.378	0.183351
0.78756	503.7	459.671	0.183868
0.7876	504.5	460.967	0.184387
0.78764	510.9	462.266	0.184906
0.78768	517.1	463.568	0.185427
0.78772	501.8	464.871	0.185948
0.78776	520.6	466.176	0.18647
0.7878	480	467.482	0.186993
0.78784	534.8	468.789	0.187515
0.78788	546.1	470.095	0.188038
0.78792	564.7	471.402	0.188561
0.78796	601.8	472.709	0.189083
0.788	599.5	474.014	0.189606
0.78804	641	475.319	0.190127
0.78808	626.1	476.622	0.190649
0.78812	654.7	477.924	0.19117
0.78816	667.4	479.224	0.19169
0.7882	671.1	480.523	0.192209
0.78824	652.6	481.821	0.192728
0.78828	671.7	483.117	0.193247
0.78832	607.3	484.413	0.193765
0.78836	573	485.707	0.194283
0.7884	513.2	487.001	0.1948
0.78844	465.8	488.295	0.195318
0.78848	424.6	489.589	0.195836
0.78852	412.3	490.883	0.196353
0.78856	368.3	492.179	0.196872
0.7886	339.6	493.476	0.19739
0.78864	323.8	494.774	0.19791
0.78868	310.9	496.074	0.19843
0.78872	324.7	497.376	0.19895
0.78876	328.7	498.679	0.199472
0.7888	361.2	499.985	0.199994
0.78884	365.6	501.292	0.200517
0.78888	426.2	502.601	0.20104
0.78892	453	503.911	0.201564
0.78896	479	505.222	0.202089
0.789	506.5	506.535	0.202614
0.78904	531.4	507.848	0.203139
0.78908	535.9	509.161	0.203665
0.78912	533.7	510.475	0.20419
0.78916	575.5	511.789	0.204716
0.7892	590.3	513.103	0.205241
0.78924	605.4	514.416	0.205767
0.78928	597.4	515.729	0.206292
0.78932	590.1	517.041	0.206816
0.78936	586.6	518.352	0.207341
0.7894	592.5	519.663	0.207865
0.78944	571.6	520.972	0.208389
0.78948	552.6	522.281	0.208912
0.78952	564.5	523.589	0.209435
0.78956	557.2	524.895	0.209958
0.7896	566.5	526.201	0.21048
0.78964	555.6	527.506	0.211002
0.78968	555.9	528.81	0.211524
0.78972	552.1	530.114	0.212046
0.78976	562.2	531.417	0.212567
0.7898	570.7	532.72	0.213088
0.78984	577.3	534.022	0.213609
0.78988	586.3	535.324	0.214129
0.78992	546.5	536.625	0.21465
0.78996	574.5	537.927	0.215171
0.79	571.8	539.229	0.215692
0.79004	534	540.531	0.216213
0.79008	508	541.834	0.216734
0.79012	513.5	543.138	0.217255
0.79016	494.8	544.443	0.217777
0.7902	499.5	545.748	0.218299
0.79024	491.1	547.055	0.218822
0.79028	473.7	548.363	0.219345
0.79032	451.2	549.673	0.219869
0.79036	423.3	550.984	0.220394
0.7904	435.1	552.297	0.220919
0.79044	442.1	553.611	0.221444
0.79048	410.3	554.927	0.221971
0.79052	441	556.244	0.222497
0.79056	427.8	557.562	0.223025
0.7906	460.8	558.881	0.223552
0.79064	469.5	560.201	0.22408
0.79068	457	561.521	0.224609
0.79072	511.7	562.842	0.225137
0.79076	509.6	564.162	0.225665
0.7908	535.6	565.481	0.226192
0.79084	559.8	566.799	0.22672
0.79088	581.9	568.116	0.227246
0.79092	620.5	569.431	0.227772
0.79096	637.9	570.743	0.228297
0.791	674.7	572.053	0.228821
0.79104	674.1	573.359	0.229344
0.79108	691.7	574.662	0.229865
0.79112	685.8	575.961	0.230384
0.79116	716.6	577.256	0.230902
0.7912	743.4	578.546	0.231419
0.79124	744.1	579.832	0.231933
0.79128	764.3	581.114	0.232446
0.79132	735.1	582.391	0.232956
0.79136	763.5	583.663	0.233465
0.7914	722.2	584.931	0.233973
0.79144	731.5	586.195	0.234478
0.79148	709.6	587.455	0.234982
0.79152	693.4	588.711	0.235484
0.79156	651.1	589.963	0.235985
0.7916	630.7	591.213	0.236485
0.79164	617.9	592.46	0.236984
0.79168	590.9	593.705	0.237482
0.79172	567.9	594.948	0.237979
0.79176	547.3	596.19	0.238476
0.7918	553.9	597.43	0.238972
0.79184	535.4	598.671	0.239468
0.79188	525.3	599.911	0.239964
0.79192	554.7	601.151	0.24046
0.79196	545.4	602.392	0.240957
0.792	527.5	603.634	0.241453
0.79204	525.1	604.877	0.241951
0.79208	537.2	606.121	0.242448
0.79212	531.4	607.367	0.242947
0.79216	526.6	608.615	0.243446
0.7922	537	609.864	0.243946
0.79224	535.6	611.116	0.244446
0.79228	540.1	612.37	0.244948
0.79232	548.2	613.627	0.245451
0.79236	532.1	614.885	0.245954
0.7924	508	616.146	0.246459
0.79244	523.3	617.41	0.246964
0.79248	507.3	618.676	0.24747
0.79252	503.5	619.944	0.247977
0.79256	501.5	621.214	0.248485
0.7926	518.3	622.486	0.248994
0.79264	539.5	623.759	0.249504
0.79268	538	625.034	0.250014
0.79272	538.5	626.31	0.250524
0.79276	556.5	627.587	0.251035
0.7928	580	628.864	0.251546
0.79284	618.9	630.141	0.252056
0.79288	651.9	631.418	0.252567
0.79292	671.1	632.694	0.253077
0.79296	691.9	633.968	0.253587
0.793	694.4	635.241	0.254096
0.79304	714.8	636.511	0.254605
0.79308	732.5	637.78	0.255112
0.79312	705.4	639.045	0.255618
0.79316	717.8	640.308	0.256123
0.7932	711.5	641.567	0.256627
0.79324	707.5	642.822	0.257129
0.79328	696.4	644.074	0.25763
0.79332	676.6	645.322	0.258129
0.79336	663.2	646.566	0.258626
0.7934	633.1	647.805	0.259122
0.79344	637.2	649.04	0.259616
0.79348	633.1	650.271	0.260108
0.79352	613.4	651.497	0.260599
0.79356	630.6	652.718	0.261087
0.7936	658	653.934	0.261573
0.79364	661.8	655.144	0.262058
0.79368	663	656.35	0.26254
0.79372	676.2	657.55	0.26302
0.79376	697.8	658.744	0.263498
0.7938	726.4	659.932	0.263973
0.79384	743.5	661.114	0.264446
0.79388	735.2	662.29	0.264916
0.79392	749.4	663.46	0.265384
0.79396	756.7	664.624	0.26585
0.794	745.4	665.781	0.266312
0.79404	720.4	666.932	0.266773
0.79408	703.1	668.077	0.267231
0.79412	683.6	669.215	0.267686
0.79416	670.7	670.347	0.268139
0.7942	673	671.473	0.268589
0.79424	641.3	672.593	0.269037
0.79428	641.5	673.708	0.269483
0.79432	633.7	674.816	0.269926
0.79436	634.9	675.919	0.270367
0.7944	635.2	677.015	0.270806
0.79444	652.4	678.106	0.271243
0.79448	677.2	679.192	0.271677
0.79452	694.6	680.271	0.272109
0.79456	697.8	681.345	0.272538
0.7946	727.8	682.414	0.272965
0.79464	742.3	683.476	0.27339
0.79468	765.9	684.533	0.273813
0.79472	770.9	685.584	0.274234
0.79476	771.5	686.63	0.274652
0.7948	757.4	687.67	0.275068
0.79484	768.6	688.705	0.275482
0.79488	755.3	689.735	0.275894
0.79492	704.3	690.76	0.276304
0.79496	677.8	691.781	0.276712
0.795	649.1	692.797	0.277119
0.79504	640.2	693.808	0.277523
0.79508	595.3	694.816	0.277926
0.79512	589.3	695.82	0.278328
0.79516	576	696.821	0.278728
0.7952	549	697.818	0.279127
0.79524	592.2	698.811	0.279524
0.79528	603.1	699.801	0.27992
0.79532	623.7	700.788	0.280315
0.79536	620.4	701.771	0.280708
0.7954	651	702.75	0.2811
0.79544	722.3	703.726	0.28149
0.79548	777.8	704.697	0.281879
0.79552	756	705.665	0.282266
0.79556	793.5	706.628	0.282651
0.7956	802.4	707.588	0.283035
0.79564	774.6	708.542	0.283417
0.79568	772.8	709.493	0.283797
0.79572	789	710.439	0.284176
0.79576	804.9	711.381	0.284552
0.7958	746.7	712.318	0.284927
0.79584	737.7	713.251	0.285301
0.79588	699.4	714.181	0.285672
0.79592	704.7	715.106	0.286042
0.79596	625	716.027	0.286411
0.796	613.3	716.944	0.286778
0.79604	626	717.858	0.287143
0.79608	618.9	718.768	0.287507
0.79612	620	719.674	0.28787
0.79616	616.2	720.577	0.288231
0.7962	643	721.476	0.28859
0.79624	667.4	722.37	0.288948
0.79628	712.6	723.261	0.289304
0.79632	718.5	724.147	0.289659
0.79636	738.6	725.029	0.290012
0.7964	787.7	725.906	0.290362
0.79644	786.1	726.778	0.290711
0.79648	805.5	727.645	0.291058
0.79652	819.3	728.507	0.291403
0.79656	796.7	729.364	0.291746
0.7966	838.3	730.216	0.292086
0.79664	796.5	731.062	0.292425
0.79668	775.2	731.902	0.292761
0.79672	758.4	732.738	0.293095
0.79676	772.8	733.568	0.293427
0.7968	750.2	734.393	0.293757
0.79684	727.8	735.212	0.294085
0.79688	697.4	736.027	0.294411
0.79692	646.3	736.836	0.294735
0.79696	646.2	737.641	0.295056
0.797	670.8	738.44	0.295376
0.79704	708.2	739.235	0.295694
0.79708	697.5	740.025	0.29601
0.79712	707.3	740.809	0.296324
0.79716	751.2	741.588	0.296635
0.7972	758.5	742.362	0.296945
0.79724	788.3	743.131	0.297252
0.79728	810.4	743.895	0.297558
0.79732	836	744.653	0.297861
0.79736	860.2	745.405	0.298162
0.7974	874.4	746.152	0.298461
0.79744	888.8	746.894	0.298758
0.79748	875.7	747.631	0.299052
0.79752	858.8	748.362	0.299345
0.79756	833.7	749.088	0.299635
0.7976	823.9	749.81	0.299924
0.79764	770.7	750.528	0.300211
0.79768	745.2	751.241	0.300496
0.79772	750.6	751.951	0.30078
0.79776	727.6	752.657	0.301063
0.7978	707.2	753.36	0.301344
0.79784	682.2	754.06	0.301624
0.79788	639.4	754.758	0.301903
0.79792	652.1	755.454	0.302182
0.79796	626.7	756.148	0.302459
0.798	637.6	756.839	0.302736
0.79804	663.7	757.529	0.303012
0.79808	663.5	758.218	0.303287
0.79812	697.6	758.905	0.303562
0.79816	679.2	759.59	0.303836
0.7982	713.9	760.274	0.30411
0.79824	734.5	760.956	0.304382
0.79828	764	761.636	0.304655
0.79832	770.2	762.315	0.304926
0.79836	780.5	762.992	0.305197
0.7984	784.8	763.667	0.305467
0.79844	784.5	764.34	0.305736
0.79848	800.8	765.01	0.306004
0.79852	746.7	765.679	0.306272
0.79856	743.3	766.346	0.306538
0.7986	737	767.01	0.306804
0.79864	723.2	767.672	0.307069
0.79868	744.4	768.332	0.307333
0.79872	724.2	768.989	0.307596
0.79876	719.9	769.644	0.307858
0.7988	754.7	770.296	0.308118
0.79884	747.6	770.946	0.308378
0.79888	731.5	771.592	0.308637
0.79892	723.2	772.236	0.308894
0.79896	735.7	772.876	0.30915
0.799	742.7	773.513	0.309405
0.79904	763.4	774.146	0.309658
0.79908	763.4	774.776	0.30991
0.79912	775.2	775.401	0.31016
0.79916	790.6	776.023	0.310409
0.7992	765.7	776.639	0.310656
0.79924	802.6	777.252	0.310901
0.79928	781.5	777.859	0.311144
0.79932	795.4	778.461	0.311384
0.79936	812.1	779.058	0.311623
0.7994	812.4	779.649	0.31186
0.79944	794.9	780.235	0.312094
0.79948	754.4	780.815	0.312326
0.79952	746.4	781.389	0.312556
0.79956	751.9	781.957	0.312783
0.7996	759.5	782.518	0.313007
0.79964	779	783.073	0.313229
0.79968	812	783.621	0.313448
0.79972	804.9	784.161	0.313665
0.79976	817	784.695	0.313878
0.7998	793.5	785.221	0.314088
0.79984	801.2	785.74	0.314296
0.79988	831.6	786.25	0.3145
0.79992	839.4	786.753	0.314701
0.79996	851.6	787.248	0.314899
0.8	842	787.735	0.315094
0.80004	852.9	788.213	0.315285
0.80008	858.5	788.682	0.315473
0.80012	877	789.144	0.315657
0.80016	837.7	789.596	0.315838
0.8002	856.6	790.04	0.316016
0.80024	845.2	790.476	0.31619
0.80028	836.9	790.903	0.316361
0.80032	830.4	791.322	0.316529
0.80036	813.5	791.732	0.316693
0.8004	788.9	792.135	0.316854
0.80044	782.5	792.529	0.317011
0.80048	806.2	792.915	0.317166
0.80052	821.9	793.293	0.317317
0.80056	809.6	793.664	0.317465
0.8006	804.5	794.026	0.317611
0.80064	791.2	794.382	0.317753
0.80068	795.2	794.73	0.317892
0.80072	820.5	795.07	0.318028
0.80076	820.8	795.404	0.318162
0.8008	799.1	795.73	0.318292
0.80084	824.7	796.05	0.31842
0.80088	817.5	796.363	0.318545
0.80092	828.8	796.67	0.318668
0.80096	804.5	796.97	0.318788
0.801	791.3	797.264	0.318906
0.80104	808.2	797.552	0.319021
0.80108	775.7	797.835	0.319134
0.80112	798.1	798.112	0.319245
0.80116	739.3	798.383	0.319353
0.8012	751.3	798.649	0.31946
0.80124	737.9	798.91	0.319564
0.80128	732.3	799.166	0.319667
0.80132	751.8	799.418	0.319767
0.80136	732.5	799.664	0.319866
0.8014	710.9	799.906	0.319963
0.80144	726.1	800.144	0.320058
0.80148	749	800.377	0.320151
0.80152	745.7	800.605	0.320242
0.80156	748.3	800.828	0.320331
0.8016	757.9	801.047	0.320419
0.80164	777	801.261	0.320504
0.80168	777.6	801.47	0.320588
0.80172	783.4	801.674	0.32067
0.80176	817.7	801.873	0.320749
0.8018	810.9	802.067	0.320827
0.80184	828.8	802.255	0.320902
0.80188	828.6	802.438	0.320975
0.80192	820.4	802.615	0.321046
0.80196	813.2	802.787	0.321115
0.802	825.2	802.952	0.321181
0.80204	832.3	803.112	0.321245
0.80208	820.2	803.266	0.321306
0.80212	801.4	803.414	0.321366
0.80216	794.4	803.556	0.321422
0.8022	790.3	803.691	0.321476
0.80224	781.9	803.821	0.321528
0.80228	767.4	803.944	0.321577
0.80232	763.9	804.06	0.321624
0.80236	768.5	804.171	0.321668
0.8024	785.8	804.274	0.32171
0.80244	800.4	804.371	0.321748
0.80248	812	804.461	0.321785
0.80252	806.4	804.544	0.321818
0.80256	824.6	804.621	0.321848
0.8026	851.2	804.69	0.321876
0.80264	828.5	804.751	0.3219
0.80268	852.7	804.805	0.321922
0.80272	863.9	804.852	0.321941
0.80276	887.4	804.891	0.321956
0.8028	898.6	804.923	0.321969
0.80284	886.4	804.946	0.321979
0.80288	867.1	804.963	0.321985
0.80292	856.3	804.971	0.321988
0.80296	850.4	804.972	0.321989
0.803	824.7	804.966	0.321986
0.80304	800.1	804.952	0.321981
0.80308	793.7	804.932	0.321973
0.80312	795.6	804.904	0.321962
0.80316	776.6	804.869	0.321948
0.8032	751.7	804.828	0.321931
0.80324	727.1	804.779	0.321912
0.80328	747.1	804.725	0.32189
0.80332	753.1	804.663	0.321865
0.80336	778.3	804.595	0.321838
0.8034	769	804.52	0.321808
0.80344	783	804.439	0.321776
0.80348	772.2	804.352	0.321741
0.80352	791.4	804.257	0.321703
0.80356	807.6	804.156	0.321663
0.8036	822.4	804.049	0.321619
0.80364	852.6	803.934	0.321574
0.80368	872.8	803.813	0.321525
0.80372	893.8	803.686	0.321474
0.80376	888.8	803.551	0.32142
0.8038	886.1	803.41	0.321364
0.80384	859.5	803.262	0.321305
0.80388	843.8	803.108	0.321243
0.80392	821.1	802.947	0.321179
0.80396	812.3	802.78	0.321112
0.804	789.4	802.607	0.321043
0.80404	778.4	802.428	0.320971
0.80408	750.5	802.243	0.320897
0.80412	730.4	802.053	0.320821
0.80416	709.7	801.858	0.320743
0.8042	713.8	801.656	0.320663
0.80424	726	801.45	0.32058
0.80428	712.6	801.238	0.320495
0.80432	747.7	801.021	0.320409
0.80436	750.6	800.799	0.32032
0.8044	769.3	800.572	0.320229
0.80444	784.7	800.338	0.320135
0.80448	801.8	800.1	0.32004
0.80452	831.8	799.856	0.319942
0.80456	858.7	799.606	0.319842
0.8046	854	799.35	0.31974
0.80464	867.2	799.088	0.319635
0.80468	873.6	798.821	0.319528
0.80472	883.4	798.547	0.319419
0.80476	895.4	798.268	0.319307
0.8048	865.5	797.983	0.319193
0.80484	846	797.692	0.319077
0.80488	837.9	797.395	0.318958
0.80492	829.2	797.093	0.318837
0.80496	795	796.786	0.318714
0.805	793.6	796.473	0.318589
0.80504	751.9	796.156	0.318462
0.80508	747.9	795.833	0.318333
0.80512	728.9	795.506	0.318202
0.80516	738.6	795.174	0.31807
0.8052	718.5	794.838	0.317935
0.80524	675.6	794.497	0.317799
0.80528	730.6	794.152	0.317661
0.80532	736.8	793.803	0.317521
0.80536	739.5	793.449	0.31738
0.8054	733.4	793.091	0.317236
0.80544	755.4	792.728	0.317091
0.80548	796.5	792.36	0.316944
0.80552	771.8	791.988	0.316795
0.80556	774.3	791.612	0.316645
0.8056	788.2	791.23	0.316492
0.80564	840.8	790.843	0.316337
0.80568	858.6	790.451	0.31618
0.80572	814.7	790.054	0.316021
0.80576	803.5	789.651	0.31586
0.8058	809.1	789.243	0.315697
0.80584	825.2	788.83	0.315532
0.80588	823.6	788.411	0.315364
0.80592	787.1	787.986	0.315195
0.80596	781.9	787.556	0.315022
0.806	788.6	787.121	0.314848
0.80604	857.7	786.679	0.314672
0.80608	821	786.232	0.314493
0.80612	802	785.78	0.314312
0.80616	808.9	785.321	0.314129
0.8062	820.2	784.858	0.313943
0.80624	874.4	784.388	0.313755
0.80628	837.3	783.913	0.313565
0.80632	833	783.433	0.313373
0.80636	829.7	782.947	0.313179
0.8064	836	782.456	0.312982
0.80644	865.8	781.96	0.312784
0.80648	854.2	781.459	0.312584
0.80652	834.8	780.954	0.312381
0.80656	802.9	780.444	0.312177
0.8066	797.8	779.929	0.311972
0.80664	791	779.411	0.311764
0.80668	775.2	778.889	0.311556
0.80672	767.2	778.363	0.311345
0.80676	721.3	777.835	0.311134
0.8068	719	777.303	0.310921
0.80684	707	776.769	0.310707
0.80688	711.6	776.232	0.310493
0.80692	693.7	775.693	0.310277
0.80696	736.2	775.151	0.310061
0.807	702	774.608	0.309843
0.80704	718.7	774.063	0.309625
0.80708	689.5	773.516	0.309406
0.80712	710.6	772.967	0.309187
0.80716	696.6	772.417	0.308967
0.8072	708.1	771.864	0.308746
0.80724	762.1	771.31	0.308524
0.80728	780.3	770.755	0.308302
0.80732	745	770.197	0.308079
0.80736	730.2	769.638	0.307855
0.8074	721.5	769.076	0.307631
0.80744	745.2	768.513	0.307405
0.80748	768.3	767.948	0.307179
0.80752	754.6	767.38	0.306952
0.80756	752.5	766.81	0.306724
0.8076	724.8	766.237	0.306495
0.80764	750.6	765.662	0.306265
0.80768	780.6	765.085	0.306034
0.80772	748.3	764.504	0.305802
0.80776	787.4	763.921	0.305568
0.8078	798.3	763.334	0.305334
0.80784	751.8	762.744	0.305098
0.80788	777.4	762.151	0.30486
0.80792	786	761.554	0.304622
0.80796	796.5	760.954	0.304382
0.808	788	760.35	0.30414
0.80804	847	759.743	0.303897
0.80808	823.8	759.132	0.303653
0.80812	795.1	758.516	0.303407
0.80816	801.4	757.897	0.303159
0.8082	772.6	757.274	0.30291
0.80824	784	756.647	0.302659
0.80828	758.9	756.016	0.302407
0.80832	766.9	755.382	0.302153
0.80836	725.9	754.743	0.301897
0.8084	724.2	754.101	0.30164
0.80844	705	753.455	0.301382
0.80848	682.2	752.805	0.301122
0.80852	699.3	752.152	0.300861
0.80856	689.3	751.495	0.300598
0.8086	689.7	750.834	0.300333
0.80864	706.6	750.169	0.300067
0.80868	735.7	749.5	0.2998
0.80872	737.2	748.826	0.299531
0.80876	721.8	748.149	0.29926
0.8088	731.6	747.467	0.298987
0.80884	740.5	746.781	0.298712
0.80888	743.6	746.09	0.298436
0.80892	761.3	745.394	0.298158
0.80896	796.9	744.693	0.297877
0.809	786.2	743.987	0.297595
0.80904	774.3	743.276	0.29731
0.80908	764.7	742.559	0.297024
0.80912	759.9	741.837	0.296735
0.80916	757.3	741.11	0.296444
0.8092	779.5	740.376	0.296151
0.80924	784.3	739.637	0.295855
0.80928	762	738.893	0.295557
0.80932	728.5	738.142	0.295257
0.80936	698.1	737.386	0.294954
0.8094	707.2	736.624	0.29465
0.80944	703.1	735.856	0.294342
0.80948	728.6	735.082	0.294033
0.80952	709.7	734.301	0.293721
0.80956	723.2	733.515	0.293406
0.8096	719	732.722	0.293089
0.80964	733.9	731.924	0.292769
0.80968	735.9	731.118	0.292447
0.80972	742.4	730.307	0.292123
0.80976	749.6	729.488	0.291795
0.8098	769.7	728.663	0.291465
0.80984	778.6	727.831	0.291132
0.80988	767.8	726.992	0.290797
0.80992	775.5	726.147	0.290459
0.80996	764.8	725.294	0.290118
0.81	752	724.435	0.289774
0.81004	751.2	723.569	0.289427
0.81008	742.8	722.696	0.289078
0.81012	735.1	721.815	0.288726
0.81016	720.9	720.929	0.288371
0.8102	693	720.035	0.288014
0.81024	719.5	719.134	0.287654
0.81028	688.8	718.227	0.287291
0.81032	682.6	717.313	0.286925
0.81036	673.9	716.393	0.286557
0.8104	648	715.465	0.286186
0.81044	650.3	714.531	0.285813
0.81048	650.6	713.591	0.285436
0.81052	666.9	712.643	0.285057
0.81056	650.8	711.689	0.284676
0.8106	651.9	710.728	0.284291
0.81064	677.2	709.759	0.283904
0.81068	685.4	708.783	0.283513
0.81072	679.2	707.8	0.28312
0.81076	698.4	706.809	0.282724
0.8108	693.6	705.811	0.282324
0.81084	729.3	704.804	0.281922
0.81088	714.3	703.789	0.281516
0.81092	709.4	702.766	0.281107
0.81096	718.5	701.735	0.280694
0.811	735.8	700.694	0.280278
0.81104	725.7	699.645	0.279858
0.81108	734.7	698.586	0.279435
0.81112	731.9	697.519	0.279007
0.81116	753.3	696.442	0.278577
0.8112	738.1	695.355	0.278142
0.81124	709.4	694.259	0.277704
0.81128	719.8	693.153	0.277261
0.81132	701.6	692.038	0.276815
0.81136	701.1	690.913	0.276365
0.8114	696.2	689.777	0.275911
0.81144	705.1	688.632	0.275453
0.81148	681.1	687.477	0.274991
0.81152	677.5	686.312	0.274525
0.81156	656.9	685.137	0.274055
0.8116	695.6	683.952	0.273581
0.81164	698.1	682.756	0.273103
0.81168	707.1	681.551	0.27262
0.81172	702.2	680.335	0.272134
0.81176	698.6	679.108	0.271643
0.8118	737.9	677.872	0.271149
0.81184	741.4	676.624	0.27065
0.81188	735.3	675.367	0.270147
0.81192	734	674.099	0.26964
0.81196	727.5	672.82	0.269128
0.812	728.5	671.532	0.268613
0.81204	749	670.233	0.268093
0.81208	725.9	668.924	0.26757
0.81212	722.2	667.605	0.267042
0.81216	709.5	666.277	0.266511
0.8122	712.2	664.939	0.265975
0.81224	690.2	663.591	0.265436
0.81228	668	662.235	0.264894
0.81232	669.3	660.869	0.264348
0.81236	657.6	659.495	0.263798
0.8124	648.9	658.112	0.263245
0.81244	637	656.721	0.262689
0.81248	628.5	655.323	0.262129
0.81252	614.8	653.916	0.261566
0.81256	623.3	652.502	0.261001
0.8126	600.2	651.081	0.260432
0.81264	614.3	649.652	0.259861
0.81268	645.6	648.217	0.259287
0.81272	650.3	646.775	0.25871
0.81276	645.7	645.326	0.25813
0.8128	640.9	643.871	0.257548
0.81284	662.9	642.409	0.256964
0.81288	665.8	640.942	0.256377
0.81292	641.1	639.468	0.255787
0.81296	657.8	637.988	0.255195
0.813	661.9	636.503	0.254601
0.81304	655.1	635.013	0.254005
0.81308	648.7	633.517	0.253407
0.81312	639.8	632.016	0.252806
0.81316	627	630.511	0.252204
0.8132	610	629	0.2516
0.81324	610.3	627.485	0.250994
0.81328	626.4	625.966	0.250387
0.81332	584.6	624.443	0.249777
0.81336	603.1	622.917	0.249167
0.8134	578.8	621.386	0.248554
0.81344	587.4	619.852	0.247941
0.81348	602.6	618.315	0.247326
0.81352	594.7	616.774	0.24671
0.81356	587.1	615.231	0.246092
0.8136	579.6	613.684	0.245474
0.81364	599	612.135	0.244854
0.81368	609.1	610.583	0.244233
0.81372	613.7	609.028	0.243611
0.81376	617.6	607.471	0.242988
0.8138	606.2	605.912	0.242365
0.81384	628.3	604.35	0.24174
0.81388	602.7	602.786	0.241114
0.81392	622	601.219	0.240488
0.81396	612.9	599.651	0.23986
0.814	598.2	598.081	0.239232
0.81404	605.3	596.509	0.238604
0.81408	586.6	594.936	0.237974
0.81412	591.7	593.361	0.237344
0.81416	578	591.784	0.236714
