# Supplementary material for: Shear Thickening Fluids in Cork Agglomerates: An Exploration of Advantages and Drawbacks
Source: Preprints.org preprint supplement (doi:10.20944/preprints202304.0004.v1), 2023-04-03
Supplement: Supplementary file 11 [file EN_x_20.xlsx]

## Sheet: data
Time - Voltage - Voltage	Amplitude - Voltage - Voltage
0	562.2
4e-05	559.3
8e-05	562.9
0.00012	557.7
0.00016	563.9
0.0002	556.2
0.00024	563.5
0.00028	555.3
0.00032	563.2
0.00036	555.2
0.0004	562.7
0.00044	555.4
0.00048	562.3
0.00052	555.8
0.00056	561.1
0.0006	557.3
0.00064	561.2
0.00068	557.4
0.00072	561.3
0.00076	558.6
0.0008	561.8
0.00084	558.5
0.00088	562
0.00092	559.1
0.00096	562.2
0.001	560.1
0.00104	561.4
0.00108	561.1
0.00112	560.3
0.00116	562
0.0012	558.9
0.00124	563.2
0.00128	557.1
0.00132	563.5
0.00136	556
0.0014	563.9
0.00144	555.4
0.00148	563.2
0.00152	554.8
0.00156	562.3
0.0016	555.3
0.00164	561.8
0.00168	556
0.00172	561.1
0.00176	557
0.0018	561.4
0.00184	558.1
0.00188	561.5
0.00192	558.4
0.00196	562
0.002	558.9
0.00204	562.2
0.00208	559.5
0.00212	561.9
0.00216	560.1
0.0022	561.2
0.00224	561.5
0.00228	559.8
0.00232	562.7
0.00236	558.1
0.0024	563.5
0.00244	556.5
0.00248	563.7
0.00252	555.7
0.00256	563.3
0.0026	554.9
0.00264	562.9
0.00268	555.2
0.00272	562.2
0.00276	555.5
0.0028	561.5
0.00284	556.3
0.00288	561.4
0.00292	557.4
0.00296	561.2
0.003	558
0.00304	561.5
0.00308	558.9
0.00312	562.3
0.00316	559.1
0.0032	562.1
0.00324	559.8
0.00328	561.9
0.00332	560.3
0.00336	560.6
0.0034	562.1
0.00344	559.2
0.00348	563
0.00352	557.8
0.00356	563.8
0.0036	556.2
0.00364	563.6
0.00368	555.4
0.00372	563.3
0.00376	555.1
0.0038	562.5
0.00384	555.4
0.00388	562
0.00392	555.9
0.00396	561.4
0.004	557.3
0.00404	561
0.00408	557.5
0.00412	561.5
0.00416	558.2
0.0042	562
0.00424	558.7
0.00428	562.3
0.00432	559.7
0.00436	562.1
0.0044	560.3
0.00444	561.3
0.00448	561.5
0.00452	559.9
0.00456	562.2
0.0046	558.8
0.00464	563.3
0.00468	557.1
0.00472	563.7
0.00476	555.6
0.0048	563.6
0.00484	555.1
0.00488	563
0.00492	555
0.00496	562.4
0.005	555.6
0.00504	562
0.00508	556.6
0.00512	561.4
0.00516	557.5
0.0052	561.5
0.00524	558
0.00528	561.5
0.00532	558.5
0.00536	561.9
0.0054	559.5
0.00544	562
0.00548	559.9
0.00552	562
0.00556	560.9
0.0056	561.1
0.00564	561.5
0.00568	559.5
0.00572	563.1
0.00576	557.5
0.0058	563.8
0.00584	556.9
0.00588	564
0.00592	555.5
0.00596	563.2
0.006	555.2
0.00604	562.7
0.00608	555.3
0.00612	562.1
0.00616	555.6
0.0062	561.6
0.00624	556.9
0.00628	561.7
0.00632	557.8
0.00636	561.4
0.0064	558.3
0.00644	561.7
0.00648	559
0.00652	562.2
0.00656	559.5
0.0066	562.4
0.00664	560
0.00668	561.5
0.00672	561.3
0.00676	560.9
0.0068	562.5
0.00684	558.8
0.00688	563.1
0.00692	557.6
0.00696	563.6
0.007	556.2
0.00704	564.1
0.00708	555.4
0.00712	563.1
0.00716	555
0.0072	562.8
0.00724	555.7
0.00728	561.9
0.00732	556
0.00736	561.6
0.0074	557.2
0.00744	561.3
0.00748	557.8
0.00752	561.8
0.00756	558.4
0.0076	562.1
0.00764	559.3
0.00768	562.5
0.00772	559.7
0.00776	562.1
0.0078	560.8
0.00784	561.3
0.00788	561.7
0.00792	559.9
0.00796	562.9
0.008	558.2
0.00804	563.4
0.00808	557.3
0.00812	563.7
0.00816	556
0.0082	563.5
0.00824	555.1
0.00828	563.3
0.00832	554.8
0.00836	562.6
0.0084	555.9
0.00844	561.7
0.00848	556.8
0.00852	561.2
0.00856	557.7
0.0086	561.5
0.00864	558.3
0.00868	561.8
0.00872	558.7
0.00876	562.2
0.0088	559.3
0.00884	562.5
0.00888	560.1
0.00892	561.8
0.00896	561
0.009	560.8
0.00904	561.9
0.00908	559.2
0.00912	563.2
0.00916	557.5
0.0092	564.1
0.00924	556.1
0.00928	564
0.00932	555.6
0.00936	563.5
0.0094	555.2
0.00944	562.5
0.00948	555.3
0.00952	562
0.00956	556.2
0.0096	561.3
0.00964	557.3
0.00968	561.4
0.00972	557.6
0.00976	561.7
0.0098	558.7
0.00984	561.9
0.00988	558.9
0.00992	562.3
0.00996	559.8
0.01	562.1
0.01004	560.5
0.01008	561.5
0.01012	561.6
0.01016	560.2
0.0102	562.5
0.01024	558.7
0.01028	563.7
0.01032	557.3
0.01036	563.9
0.0104	556.2
0.01044	563.6
0.01048	554.9
0.01052	563.2
0.01056	555.3
0.0106	562.5
0.01064	556
0.01068	562
0.01072	556.7
0.01076	561.3
0.0108	557.7
0.01084	561.5
0.01088	558.3
0.01092	562
0.01096	558.7
0.011	562.4
0.01104	559.3
0.01108	562.4
0.01112	560.2
0.01116	561.9
0.0112	561.4
0.01124	561
0.01128	561.9
0.01132	559.5
0.01136	563.2
0.0114	558
0.01144	563.8
0.01148	556.6
0.01152	563.9
0.01156	555.6
0.0116	563.4
0.01164	555.6
0.01168	562.9
0.01172	555.1
0.01176	562.1
0.0118	556.2
0.01184	562.1
0.01188	557.2
0.01192	561.7
0.01196	557.9
0.012	561.6
0.01204	558.4
0.01208	562
0.01212	559.1
0.01216	562.2
0.0122	559.5
0.01224	562.2
0.01228	560.3
0.01232	561.8
0.01236	561.3
0.0124	560.4
0.01244	562.6
0.01248	559.1
0.01252	563.6
0.01256	557.4
0.0126	563.7
0.01264	556.3
0.01268	564
0.01272	555.2
0.01276	563.3
0.0128	555.3
0.01284	562.4
0.01288	555.9
0.01292	562.2
0.01296	556.4
0.013	561.4
0.01304	557.5
0.01308	561.5
0.01312	558.1
0.01316	561.8
0.0132	558.5
0.01324	562
0.01328	559.2
0.01332	562.8
0.01336	559.7
0.0134	562.1
0.01344	560.7
0.01348	561.2
0.01352	561.9
0.01356	560.2
0.0136	562.8
0.01364	558.8
0.01368	563.5
0.01372	557
0.01376	564
0.0138	556.1
0.01384	563.5
0.01388	555.3
0.01392	563.4
0.01396	555.3
0.014	562.6
0.01404	555.8
0.01408	561.8
0.01412	556.5
0.01416	561.7
0.0142	557.7
0.01424	561.5
0.01428	558.3
0.01432	561.5
0.01436	558.7
0.0144	562.1
0.01444	559.2
0.01448	562.7
0.01452	560
0.01456	562.1
0.0146	560.9
0.01464	560.6
0.01468	562.1
0.01472	559.4
0.01476	563.2
0.0148	558
0.01484	563.4
0.01488	556.9
0.01492	563.8
0.01496	555.6
0.015	563.2
0.01504	555.3
0.01508	562.7
0.01512	555.1
0.01516	561.8
0.0152	556.1
0.01524	561.8
0.01528	556.7
0.01532	561.3
0.01536	557.8
0.0154	561.4
0.01544	558.3
0.01548	561.6
0.01552	559.2
0.01556	562
0.0156	559.7
0.01564	562.5
0.01568	560.2
0.01572	561.9
0.01576	561.2
0.0158	560.5
0.01584	562.2
0.01588	559
0.01592	563.3
0.01596	557.6
0.016	563.7
0.01604	556.2
0.01608	563.6
0.01612	555.8
0.01616	563.1
0.0162	554.9
0.01624	562.5
0.01628	555.6
0.01632	561.8
0.01636	556.3
0.0164	561.2
0.01644	557.4
0.01648	560.8
0.01652	558
0.01656	561.8
0.0166	558.2
0.01664	562.1
0.01668	559.2
0.01672	562.2
0.01676	559.8
0.0168	561.8
0.01684	561
0.01688	560.8
0.01692	561.6
0.01696	559.8
0.017	563
0.01704	558.2
0.01708	563.3
0.01712	556.9
0.01716	563.8
0.0172	555.5
0.01724	563.4
0.01728	555.6
0.01732	562.7
0.01736	555
0.0174	562.2
0.01744	555.8
0.01748	561.6
0.01752	556.6
0.01756	561.2
0.0176	557.6
0.01764	561.4
0.01768	558.1
0.01772	561.8
0.01776	558.9
0.0178	562.3
0.01784	559.2
0.01788	562.1
0.01792	559.9
0.01796	561.7
0.018	561.1
0.01804	560.6
0.01808	562
0.01812	559
0.01816	563.1
0.0182	557.5
0.01824	564
0.01828	556.2
0.01832	563.7
0.01836	555.5
0.0184	563
0.01844	555.4
0.01848	562.3
0.01852	555.5
0.01856	561.9
0.0186	556
0.01864	561.6
0.01868	557
0.01872	561.3
0.01876	558
0.0188	561.3
0.01884	558.9
0.01888	561.9
0.01892	559.2
0.01896	562.1
0.019	559.7
0.01904	561.8
0.01908	560.7
0.01912	561.4
0.01916	561.4
0.0192	560.1
0.01924	562.6
0.01928	558.4
0.01932	563.5
0.01936	557
0.0194	563.9
0.01944	555.9
0.01948	563.4
0.01952	555
0.01956	563
0.0196	554.8
0.01964	562.3
0.01968	555.5
0.01972	561.5
0.01976	556.7
0.0198	561.2
0.01984	557.5
0.01988	561.4
0.01992	558.3
0.01996	561.6
0.02	558.4
0.02004	562.5
0.02008	559
0.02012	561.6
0.02016	560.1
0.0202	561.7
0.02024	560.9
0.02028	560.7
0.02032	561.9
0.02036	559.3
0.0204	563
0.02044	557.7
0.02048	563.5
0.02052	556.9
0.02056	563.7
0.0206	555.2
0.02064	563.1
0.02068	554.9
0.02072	562.5
0.02076	555.2
0.0208	562
0.02084	555.9
0.02088	561.5
0.02092	556.7
0.02096	561.5
0.021	558
0.02104	561.5
0.02108	558.4
0.02112	561.5
0.02116	558.8
0.0212	561.9
0.02124	559.4
0.02128	562.1
0.02132	560.1
0.02136	561.2
0.0214	561.4
0.02144	560.1
0.02148	562.8
0.02152	558.4
0.02156	563.5
0.0216	556.9
0.02164	563.6
0.02168	556
0.02172	563.5
0.02176	555.1
0.0218	562.8
0.02184	555
0.02188	562.2
0.02192	555.6
0.02196	561.7
0.022	556.2
0.02204	561.5
0.02208	557.3
0.02212	561.5
0.02216	558.2
0.0222	561.5
0.02224	558.6
0.02228	561.8
0.02232	559.1
0.02236	562
0.0224	559.9
0.02244	561.7
0.02248	560.9
0.02252	560.8
0.02256	561.9
0.0226	559.3
0.02264	562.8
0.02268	557.6
0.02272	563.6
0.02276	556.2
0.0228	563.9
0.02284	555.2
0.02288	563
0.02292	555
0.02296	562.9
0.023	555
0.02304	561.9
0.02308	556.1
0.02312	561.5
0.02316	556.9
0.0232	561.5
0.02324	558.1
0.02328	561.5
0.02332	558
0.02336	561.4
0.0234	558.9
0.02344	562.1
0.02348	559.1
0.02352	561.9
0.02356	560.3
0.0236	561.2
0.02364	561.3
0.02368	560.1
0.02372	562.6
0.02376	558.5
0.0238	563.3
0.02384	556.6
0.02388	563.7
0.02392	555.9
0.02396	563.2
0.024	555.1
0.02404	563
0.02408	554.9
0.02412	562
0.02416	555.8
0.0242	561.9
0.02424	556.4
0.02428	561.5
0.02432	557.4
0.02436	561.3
0.0244	558.3
0.02444	561.4
0.02448	558.8
0.02452	562.1
0.02456	559.3
0.0246	562.3
0.02464	560.1
0.02468	562
0.02472	560.9
0.02476	560.5
0.0248	562.1
0.02484	559.4
0.02488	563
0.02492	557.7
0.02496	563.9
0.025	556.4
0.02504	563.4
0.02508	555.4
0.02512	563.5
0.02516	554.9
0.0252	563
0.02524	555.1
0.02528	562
0.02532	556.2
0.02536	561.4
0.0254	557.2
0.02544	561.5
0.02548	557.6
0.02552	561.8
0.02556	558.2
0.0256	561.9
0.02564	559
0.02568	562
0.02572	559.8
0.02576	562
0.0258	560.8
0.02584	561.4
0.02588	561.9
0.02592	559.7
0.02596	562.9
0.026	558.1
0.02604	563.5
0.02608	557
0.02612	564
0.02616	555.6
0.0262	563.6
0.02624	554.9
0.02628	563.3
0.02632	555.6
0.02636	562.4
0.0264	555.9
0.02644	561.8
0.02648	556.8
0.02652	561.3
0.02656	557.6
0.0266	561.4
0.02664	558.3
0.02668	561.7
0.02672	558.4
0.02676	562.5
0.0268	559.7
0.02684	562.2
0.02688	559.9
0.02692	561.9
0.02696	561.3
0.027	560.3
0.02704	562.2
0.02708	559.1
0.02712	563.1
0.02716	557.8
0.0272	563.8
0.02724	556.3
0.02728	563.6
0.02732	555.4
0.02736	563.3
0.0274	555.5
0.02744	562.4
0.02748	555.2
0.02752	561.9
0.02756	556.2
0.0276	561.4
0.02764	557.2
0.02768	561.6
0.02772	558
0.02776	561.7
0.0278	558.6
0.02784	562.1
0.02788	559.2
0.02792	562
0.02796	559.9
0.028	562.2
0.02804	560.8
0.02808	561.2
0.02812	561.7
0.02816	559.8
0.0282	562.7
0.02824	558.4
0.02828	563.9
0.02832	557.1
0.02836	563.8
0.0284	555.9
0.02844	563.5
0.02848	555.1
0.02852	563
0.02856	555.2
0.0286	562.1
0.02864	556.2
0.02868	561.5
0.02872	556.9
0.02876	561.4
0.0288	557.6
0.02884	561.5
0.02888	558
0.02892	561.9
0.02896	558.7
0.029	562.4
0.02904	559.1
0.02908	562.1
0.02912	560.3
0.02916	561.5
0.0292	561.4
0.02924	560.9
0.02928	562.3
0.02932	559.1
0.02936	563.5
0.0294	557.6
0.02944	563.7
0.02948	556.4
0.02952	563.9
0.02956	555.5
0.0296	563.3
0.02964	555
0.02968	562.6
0.02972	555.5
0.02976	561.9
0.0298	556.4
0.02984	561.5
0.02988	557.3
0.02992	561.4
0.02996	558.1
0.03	561.5
0.03004	558.3
0.03008	562.1
0.03012	559
0.03016	562.4
0.0302	559.6
0.03024	561.9
0.03028	560.6
0.03032	561.4
0.03036	561.2
0.0304	560.2
0.03044	563.3
0.03048	558.6
0.03052	563.7
0.03056	557.4
0.0306	564.1
0.03064	556
0.03068	563.7
0.03072	555
0.03076	563.3
0.0308	555.3
0.03084	562.4
0.03088	555.8
0.03092	562
0.03096	556.7
0.031	561.7
0.03104	557.4
0.03108	561.7
0.03112	558.1
0.03116	562.1
0.0312	558.9
0.03124	562.4
0.03128	559.3
0.03132	562.1
0.03136	560
0.0314	562
0.03144	560.8
0.03148	561.1
0.03152	562.2
0.03156	559.6
0.0316	563.3
0.03164	558
0.03168	563.7
0.03172	556.6
0.03176	563.7
0.0318	555.7
0.03184	563.4
0.03188	555.2
0.03192	562.8
0.03196	555.5
0.032	562.2
0.03204	556.1
0.03208	561.5
0.03212	557
0.03216	561.3
0.0322	558.1
0.03224	561.7
0.03228	558.4
0.03232	561.8
0.03236	558.9
0.0324	562.4
0.03244	559.5
0.03248	562.2
0.03252	560.5
0.03256	561.9
0.0326	561.6
0.03264	560.2
0.03268	562.5
0.03272	559.2
0.03276	563.4
0.0328	557.5
0.03284	563.7
0.03288	556.4
0.03292	563.9
0.03296	555.6
0.033	563.4
0.03304	555
0.03308	562.7
0.03312	555.4
0.03316	562.4
0.0332	556.7
0.03324	561.5
0.03328	557.2
0.03332	561.4
0.03336	558.2
0.0334	561.3
0.03344	559
0.03348	562
0.03352	559.4
0.03356	562.4
0.0336	559.5
0.03364	562.2
0.03368	560.9
0.03372	561.4
0.03376	561.7
0.0338	560.1
0.03384	562.9
0.03388	558.4
0.03392	563.6
0.03396	557
0.034	564.1
0.03404	556
0.03408	563.6
0.03412	555.4
0.03416	563.1
0.0342	555.2
0.03424	562.4
0.03428	556.3
0.03432	561.6
0.03436	556.5
0.0344	561.5
0.03444	557.4
0.03448	561.5
0.03452	558.1
0.03456	562.1
0.0346	558.6
0.03464	562.1
0.03468	559.6
0.03472	562.1
0.03476	559.9
0.0348	562.2
0.03484	560.7
0.03488	561.2
0.03492	561.7
0.03496	559.5
0.035	563.2
0.03504	558.3
0.03508	563.7
0.03512	556.8
0.03516	564
0.0352	555.6
0.03524	563.5
0.03528	555.1
0.03532	562.7
0.03536	555.5
0.0354	561.8
0.03544	555.9
0.03548	561.5
0.03552	556.8
0.03556	561.5
0.0356	557.6
0.03564	561.5
0.03568	558.5
0.03572	561.9
0.03576	558.6
0.0358	562.3
0.03584	559.4
0.03588	562.3
0.03592	560
0.03596	561.5
0.036	561.2
0.03604	560.5
0.03608	562.7
0.03612	559.2
0.03616	563.3
0.0362	557.6
0.03624	563.9
0.03628	556.3
0.03632	563.6
0.03636	555.6
0.0364	563.1
0.03644	555.4
0.03648	562.6
0.03652	555.8
0.03656	562.1
0.0366	556.2
0.03664	561.1
0.03668	557.1
0.03672	561.6
0.03676	558
0.0368	561.3
0.03684	558.8
0.03688	561.8
0.03692	559
0.03696	562.3
0.037	559.7
0.03704	562
0.03708	560.4
0.03712	561.1
0.03716	561.5
0.0372	560
0.03724	562.7
0.03728	558.5
0.03732	563.6
0.03736	557.2
0.0374	563.9
0.03744	555.9
0.03748	563.7
0.03752	555.2
0.03756	563
0.0376	555.2
0.03764	562.1
0.03768	555.3
0.03772	561.5
0.03776	556.3
0.0378	561.6
0.03784	557.3
0.03788	561.5
0.03792	558.1
0.03796	561.5
0.038	558.6
0.03804	561.9
0.03808	559.2
0.03812	562.4
0.03816	559.6
0.0382	562.1
0.03824	560.6
0.03828	560.8
0.03832	562
0.03836	559.6
0.0384	562.9
0.03844	558.1
0.03848	563.5
0.03852	556.8
0.03856	563.7
0.0386	555.7
0.03864	563.5
0.03868	555
0.03872	563.1
0.03876	555.2
0.0388	561.9
0.03884	556.2
0.03888	561.6
0.03892	556.7
0.03896	561.3
0.039	557.8
0.03904	561.4
0.03908	558.2
0.03912	562
0.03916	558.6
0.0392	562.2
0.03924	559.2
0.03928	561.9
0.03932	560.1
0.03936	561.9
0.0394	561.2
0.03944	560.5
0.03948	562.6
0.03952	558.7
0.03956	563.2
0.0396	557.8
0.03964	563.6
0.03968	555.8
0.03972	563.6
0.03976	555.6
0.0398	563.1
0.03984	555
0.03988	562.6
0.03992	555.2
0.03996	562.2
0.04	556.2
0.04004	561.5
0.04008	557.3
0.04012	561.5
0.04016	557.7
0.0402	561.4
0.04024	558.7
0.04028	561.5
0.04032	559.1
0.04036	562.3
0.0404	559.6
0.04044	562.3
0.04048	560.2
0.04052	561.1
0.04056	561.7
0.0406	559.8
0.04064	562.9
0.04068	558.4
0.04072	563.4
0.04076	556.5
0.0408	563.9
0.04084	555.6
0.04088	563.4
0.04092	554.9
0.04096	562.7
0.041	555.2
0.04104	561.8
0.04108	555.7
0.04112	561.5
0.04116	556.4
0.0412	561.4
0.04124	557.2
0.04128	561.2
0.04132	557.9
0.04136	561.6
0.0414	558.4
0.04144	561.9
0.04148	559
0.04152	562
0.04156	559.7
0.0416	561.6
0.04164	560.5
0.04168	561
0.04172	561.9
0.04176	559.7
0.0418	562.9
0.04184	558
0.04188	563.4
0.04192	556.4
0.04196	563.6
0.042	555.5
0.04204	563.6
0.04208	555
0.04212	562.9
0.04216	554.9
0.0422	562
0.04224	555.9
0.04228	561.5
0.04232	556.8
0.04236	561.2
0.0424	557.7
0.04244	561.3
0.04248	558.2
0.04252	561.7
0.04256	558.7
0.0426	562.1
0.04264	559.3
0.04268	562.3
0.04272	560
0.04276	561.6
0.0428	561
0.04284	560.4
0.04288	562.1
0.04292	559
0.04296	563.3
0.043	557.4
0.04304	563.5
0.04308	556.2
0.04312	564.1
0.04316	555.4
0.0432	562.8
0.04324	554.8
0.04328	562.6
0.04332	555.6
0.04336	561.8
0.0434	555.6
0.04344	561.5
0.04348	556.5
0.04352	561.2
0.04356	557.8
0.0436	561.4
0.04364	558.4
0.04368	561.5
0.04372	559
0.04376	562.1
0.0438	559.3
0.04384	561.9
0.04388	560
0.04392	561.4
0.04396	561.4
0.044	559.8
0.04404	562.8
0.04408	558.5
0.04412	563.4
0.04416	557
0.0442	563.8
0.04424	555.9
0.04428	563.3
0.04432	555.1
0.04436	563
0.0444	555.3
0.04444	562.1
0.04448	555.7
0.04452	561.7
0.04456	556
0.0446	561.3
0.04464	557.5
0.04468	561.4
0.04472	558
0.04476	561.7
0.0448	558.3
0.04484	562.1
0.04488	559.3
0.04492	562.1
0.04496	560
0.045	561.8
0.04504	560.8
0.04508	560.9
0.04512	562
0.04516	559.7
0.0452	563
0.04524	557.8
0.04528	563.4
0.04532	556.9
0.04536	563.7
0.0454	555.6
0.04544	563.4
0.04548	555.2
0.04552	563
0.04556	555.6
0.0456	561.9
0.04564	555.8
0.04568	561.4
0.04572	556.7
0.04576	561.5
0.0458	557.5
0.04584	561.4
0.04588	558.4
0.04592	561.6
0.04596	558.7
0.046	562.5
0.04604	559.3
0.04608	562.5
0.04612	559.9
0.04616	561.7
0.0462	561.5
0.04624	560.4
0.04628	562.4
0.04632	559
0.04636	563.9
0.0464	557.3
0.04644	563.7
0.04648	556.2
0.04652	563.7
0.04656	555.3
0.0466	563.2
0.04664	555.4
0.04668	562.3
0.04672	555.6
0.04676	561.7
0.0468	556.4
0.04684	561.5
0.04688	557.2
0.04692	561.6
0.04696	558.2
0.047	561.8
0.04704	558.5
0.04708	561.9
0.04712	559.4
0.04716	562.1
0.0472	560
0.04724	562
0.04728	560.8
0.04732	561.2
0.04736	561.5
0.0474	559.9
0.04744	563.1
0.04748	558.2
0.04752	563.6
0.04756	556.9
0.0476	563.7
0.04764	555.3
0.04768	563.8
0.04772	554.9
0.04776	562.9
0.0478	555.3
0.04784	562.2
0.04788	556
0.04792	561.7
0.04796	557.1
0.048	561.6
0.04804	557.8
0.04808	561.6
0.04812	558.3
0.04816	562.1
0.0482	558.6
0.04824	562
0.04828	559.5
0.04832	562.3
0.04836	560.3
0.0484	561.7
0.04844	561.2
0.04848	560.6
0.04852	562.4
0.04856	559.3
0.0486	563.2
0.04864	557.7
0.04868	563.8
0.04872	556.2
0.04876	564
0.0488	555.4
0.04884	563.3
0.04888	555.1
0.04892	562.8
0.04896	555.2
0.049	562.2
0.04904	556.2
0.04908	561.5
0.04912	557.4
0.04916	561.3
0.0492	557.9
0.04924	561.7
0.04928	558.4
0.04932	562.1
0.04936	558.8
0.0494	562.5
0.04944	559.7
0.04948	562.1
0.04952	560.4
0.04956	561.4
0.0496	561.5
0.04964	560.3
0.04968	562.6
0.04972	558.8
0.04976	563.7
0.0498	556.7
0.04984	563.8
0.04988	556
0.04992	563.8
0.04996	555.5
0.05	563.4
0.05004	555.4
0.05008	562.6
0.05012	555.6
0.05016	562
0.0502	556.5
0.05024	561.6
0.05028	557
0.05032	561.7
0.05036	558
0.0504	561.5
0.05044	558.6
0.05048	562.3
0.05052	559.1
0.05056	562.2
0.0506	559.9
0.05064	562.4
0.05068	560.7
0.05072	561.5
0.05076	562
0.0508	560.3
0.05084	562.9
0.05088	558.4
0.05092	563.6
0.05096	557
0.051	563.9
0.05104	555.9
0.05108	563.9
0.05112	555.2
0.05116	563.3
0.0512	555.2
0.05124	562.4
0.05128	556.1
0.05132	561.8
0.05136	557
0.0514	561.6
0.05144	557.6
0.05148	561.8
0.05152	557.9
0.05156	561.6
0.0516	558.5
0.05164	562.4
0.05168	559.5
0.05172	562.2
0.05176	559.7
0.0518	561.9
0.05184	561
0.05188	561.1
0.05192	562.2
0.05196	559.7
0.052	563
0.05204	558.4
0.05208	563.7
0.05212	557
0.05216	563.8
0.0522	555.7
0.05224	563.5
0.05228	555.3
0.05232	563.2
0.05236	555.6
0.0524	562.2
0.05244	555.9
0.05248	561.8
0.05252	557
0.05256	561.5
0.0526	557.7
0.05264	561.4
0.05268	558.3
0.05272	561.8
0.05276	558.9
0.0528	562.6
0.05284	559.2
0.05288	562.4
0.05292	560.2
0.05296	561.8
0.053	561
0.05304	560.7
0.05308	562.5
0.05312	559.3
0.05316	563.1
0.0532	557.7
0.05324	564.3
0.05328	556.4
0.05332	563.9
0.05336	555.6
0.0534	563.3
0.05344	555.5
0.05348	562.6
0.05352	555.7
0.05356	562.1
0.0536	556.1
0.05364	561.6
0.05368	557
0.05372	561.5
0.05376	558
0.0538	561.6
0.05384	558.6
0.05388	561.9
0.05392	559.1
0.05396	562.5
0.054	559.9
0.05404	562
0.05408	560.4
0.05412	561.5
0.05416	561.4
0.0542	560.7
0.05424	562.4
0.05428	559
0.05432	563.6
0.05436	557.3
0.0544	564.1
0.05444	556.1
0.05448	563.8
0.05452	555.3
0.05456	563.4
0.0546	555.1
0.05464	562.6
0.05468	555.8
0.05472	561.8
0.05476	556.7
0.0548	561.5
0.05484	557.2
0.05488	561.5
0.05492	557.9
0.05496	561.8
0.055	558.5
0.05504	562.1
0.05508	559.4
0.05512	562.2
0.05516	559.9
0.0552	562.3
0.05524	560.8
0.05528	561
0.05532	561.9
0.05536	559.9
0.0554	562.9
0.05544	558.4
0.05548	563.7
0.05552	557.1
0.05556	563.8
0.0556	555.9
0.05564	563.3
0.05568	555.3
0.05572	562.7
0.05576	555.4
0.0558	562.2
0.05584	555.7
0.05588	561.6
0.05592	556.6
0.05596	561.4
0.056	557.9
0.05604	561.4
0.05608	558.2
0.05612	561.6
0.05616	558.8
0.0562	561.9
0.05624	559.2
0.05628	562
0.05632	560
0.05636	561.5
0.0564	561
0.05644	561
0.05648	562.2
0.05652	559.4
0.05656	563.2
0.0566	557.7
0.05664	564.1
0.05668	556
0.05672	563.9
0.05676	555.5
0.0568	563.4
0.05684	555
0.05688	563
0.05692	555.3
0.05696	562.1
0.057	556
0.05704	561.7
0.05708	556.9
0.05712	561.1
0.05716	557.6
0.0572	561.3
0.05724	558.3
0.05728	561.3
0.05732	559.2
0.05736	562.3
0.0574	559.4
0.05744	562.1
0.05748	560.2
0.05752	561.5
0.05756	561.2
0.0576	560.5
0.05764	562.2
0.05768	559.1
0.05772	563.3
0.05776	557.5
0.0578	563.8
0.05784	556.1
0.05788	563.3
0.05792	555.1
0.05796	563.3
0.058	555.1
0.05804	562.3
0.05808	555.3
0.05812	561.8
0.05816	556.4
0.0582	561.3
0.05824	557
0.05828	561.3
0.05832	557.8
0.05836	561.5
0.0584	558.3
0.05844	561.9
0.05848	559
0.05852	562.1
0.05856	559.4
0.0586	561.8
0.05864	560.6
0.05868	561.1
0.05872	561.7
0.05876	560
0.0588	562.7
0.05884	558.5
0.05888	563.2
0.05892	557
0.05896	563.5
0.059	555.6
0.05904	563.5
0.05908	555.1
0.05912	563
0.05916	555.2
0.0592	562.3
0.05924	555.2
0.05928	561.7
0.05932	556.3
0.05936	561.3
0.0594	557.3
0.05944	561.2
0.05948	558.2
0.05952	561.6
0.05956	558.6
0.0596	562
0.05964	559.2
0.05968	562.3
0.05972	559.4
0.05976	562
0.0598	560.7
0.05984	560.9
0.05988	561.6
0.05992	559.1
0.05996	563.2
0.06	557.8
0.06004	563.7
0.06008	556.6
0.06012	564.2
0.06016	555.5
0.0602	563.2
0.06024	555.2
0.06028	562.5
0.06032	555.1
0.06036	562
0.0604	555.8
0.06044	561.7
0.06048	557
0.06052	561.4
0.06056	557.7
0.0606	561.5
0.06064	558.5
0.06068	561.7
0.06072	559.1
0.06076	562
0.0608	559.4
0.06084	561.8
0.06088	560.3
0.06092	561.2
0.06096	561.2
0.061	560.3
0.06104	562.4
0.06108	558.5
0.06112	563.2
0.06116	556.9
0.0612	563.7
0.06124	555.8
0.06128	563.6
0.06132	555.1
0.06136	563
0.0614	554.8
0.06144	562.2
0.06148	555.3
0.06152	561.6
0.06156	556.3
0.0616	561.2
0.06164	557.5
0.06168	561.5
0.06172	557.9
0.06176	561.5
0.0618	558.7
0.06184	562.1
0.06188	559
0.06192	562.2
0.06196	559.7
0.062	561.9
0.06204	560.8
0.06208	560.9
0.06212	562.2
0.06216	559.3
0.0622	562.8
0.06224	557.8
0.06228	563.4
0.06232	556.4
0.06236	563.5
0.0624	555.6
0.06244	563.1
0.06248	555
0.06252	562.8
0.06256	555.4
0.0626	562.3
0.06264	555.5
0.06268	561.7
0.06272	556.3
0.06276	561.2
0.0628	557.6
0.06284	561.2
0.06288	558.6
0.06292	561.8
0.06296	558.7
0.063	562.3
0.06304	559.3
0.06308	561.5
0.06312	559.9
0.06316	561.6
0.0632	561.2
0.06324	560.3
0.06328	562.1
0.06332	559
0.06336	563.5
0.0634	557.4
0.06344	564
0.06348	556.2
0.06352	563.4
0.06356	555.1
0.0636	563.2
0.06364	555.1
0.06368	562.3
0.06372	555.2
0.06376	562
0.0638	556.2
0.06384	561.3
0.06388	556.6
0.06392	561.3
0.06396	557.8
0.064	561.6
0.06404	558.4
0.06408	562.1
0.06412	559
0.06416	562.1
0.0642	559.2
0.06424	562.1
0.06428	560.5
0.06432	561.3
0.06436	561.3
0.0644	560
0.06444	562.6
0.06448	558.5
0.06452	563.4
0.06456	557.2
0.0646	563.7
0.06464	555.6
0.06468	563.6
0.06472	555.1
0.06476	563.3
0.0648	555
0.06484	562.4
0.06488	555.6
0.06492	561.7
0.06496	556.5
0.065	561.2
0.06504	557.4
0.06508	561.5
0.06512	557.7
0.06516	561.9
0.0652	558.7
0.06524	562
0.06528	559.1
0.06532	562.2
0.06536	559.9
0.0654	562
0.06544	560.9
0.06548	560.6
0.06552	562
0.06556	559.5
0.0656	563.3
0.06564	558.2
0.06568	563.5
0.06572	556.6
0.06576	563.8
0.0658	555.6
0.06584	563.3
0.06588	555.1
0.06592	562.6
0.06596	555.4
0.066	562
0.06604	555.7
0.06608	561.6
0.06612	556.9
0.06616	561.5
0.0662	557.5
0.06624	561.3
0.06628	558.2
0.06632	561.5
0.06636	559.3
0.0664	562.2
0.06644	559.3
0.06648	562.1
0.06652	560.5
0.06656	561.7
0.0666	560.6
0.06664	560.7
0.06668	562.1
0.06672	559.2
0.06676	563.4
0.0668	557.4
0.06684	563.4
0.06688	556.2
0.06692	563.6
0.06696	555.4
0.067	563.7
0.06704	555.1
0.06708	562.5
0.06712	555.8
0.06716	561.9
0.0672	556.2
0.06724	561.6
0.06728	557
0.06732	561.4
0.06736	557.7
0.0674	561.8
0.06744	558.5
0.06748	562
0.06752	559
0.06756	562.2
0.0676	559.9
0.06764	562
0.06768	560.6
0.06772	561.5
0.06776	561.6
0.0678	560.1
0.06784	562.9
0.06788	558
0.06792	563.3
0.06796	556.8
0.068	563.8
0.06804	555.6
0.06808	563.5
0.06812	555
0.06816	563
0.0682	555.2
0.06824	562.3
0.06828	555.8
0.06832	561.7
0.06836	556.7
0.0684	561.4
0.06844	557.5
0.06848	561.3
0.06852	558.1
0.06856	561.5
0.0686	558.8
0.06864	562.4
0.06868	558.9
0.06872	562.4
0.06876	559.8
0.0688	562
0.06884	561.1
0.06888	560.7
0.06892	562.1
0.06896	559.7
0.069	563.2
0.06904	557.8
0.06908	563.6
0.06912	556.5
0.06916	563.8
0.0692	555.8
0.06924	563.3
0.06928	555.1
0.06932	562.8
0.06936	555.2
0.0694	562
0.06944	556.2
0.06948	561.5
0.06952	557
0.06956	561.8
0.0696	558
0.06964	561.6
0.06968	558.4
0.06972	562
0.06976	559.4
0.0698	562.1
0.06984	559.4
0.06988	562.3
0.06992	560.4
0.06996	561.5
0.07	561.2
0.07004	560.4
0.07008	562.7
0.07012	558.6
0.07016	563.5
0.0702	557.4
0.07024	564.3
0.07028	556.3
0.07032	563.7
0.07036	555.5
0.0704	563.1
0.07044	554.9
0.07048	562.7
0.07052	555.6
0.07056	561.8
0.0706	556.7
0.07064	561.6
0.07068	557.2
0.07072	561.4
0.07076	558
0.0708	562
0.07084	558.7
0.07088	562.1
0.07092	559.2
0.07096	562.7
0.071	560
0.07104	562.1
0.07108	560.6
0.07112	561.5
0.07116	561.7
0.0712	560.4
0.07124	562.8
0.07128	558.6
0.07132	563.2
0.07136	557.3
0.0714	564.2
0.07144	556.1
0.07148	563.8
0.07152	555.2
0.07156	563.3
0.0716	555
0.07164	562.5
0.07168	555.7
0.07172	561.9
0.07176	556.7
0.0718	561.5
0.07184	557.8
0.07188	561.6
0.07192	558.1
0.07196	561.8
0.072	558.7
0.07204	562.3
0.07208	559.3
0.07212	562.6
0.07216	560
0.0722	561.9
0.07224	560.8
0.07228	560.8
0.07232	561.9
0.07236	559.7
0.0724	563.2
0.07244	558
0.07248	563.6
0.07252	556.7
0.07256	563.9
0.0726	556
0.07264	563.5
0.07268	555
0.07272	562.9
0.07276	555.3
0.0728	562.4
0.07284	555.7
0.07288	561.8
0.07292	556.7
0.07296	561.7
0.073	557.6
0.07304	561.6
0.07308	558.4
0.07312	561.7
0.07316	559.2
0.0732	562.2
0.07324	559.7
0.07328	562.4
0.07332	560.1
0.07336	561.7
0.0734	561.5
0.07344	560.8
0.07348	562.2
0.07352	559.2
0.07356	563.1
0.0736	557.8
0.07364	563.9
0.07368	556.1
0.07372	563.7
0.07376	555.3
0.0738	563.5
0.07384	555.3
0.07388	562.9
0.07392	555.6
0.07396	561.6
0.074	556.2
0.07404	561.6
0.07408	557.3
0.07412	561.5
0.07416	558
0.0742	561.5
0.07424	558.5
0.07428	562.1
0.07432	559.2
0.07436	562.2
0.0744	559.9
0.07444	561.9
0.07448	560.8
0.07452	561.6
0.07456	561.2
0.0746	560.1
0.07464	562.8
0.07468	558.6
0.07472	563.5
0.07476	557.1
0.0748	563.7
0.07484	555.8
0.07488	563.5
0.07492	555.3
0.07496	563.2
0.075	555
0.07504	562.2
0.07508	555.9
0.07512	561.9
0.07516	556.6
0.0752	561.6
0.07524	557.5
0.07528	561.4
0.07532	558.2
0.07536	561.8
0.0754	558.8
0.07544	562.2
0.07548	559
0.07552	562.3
0.07556	560
0.0756	561.9
0.07564	561.3
0.07568	560.6
0.07572	562.4
0.07576	559.2
0.0758	563.3
0.07584	557.9
0.07588	563.8
0.07592	556.3
0.07596	564
0.076	555.4
0.07604	563.3
0.07608	555.3
0.07612	562.6
0.07616	555.4
0.0762	562
0.07624	555.7
0.07628	561.5
0.07632	557.1
0.07636	561.5
0.0764	557.6
0.07644	562.3
0.07648	558.2
0.07652	561.9
0.07656	559.1
0.0766	562.1
0.07664	559.9
0.07668	562
0.07672	560
0.07676	561.4
0.0768	561.5
0.07684	559.7
0.07688	562.8
0.07692	558.8
0.07696	563.2
0.077	557.1
0.07704	563.7
0.07708	555.8
0.07712	563.8
0.07716	554.9
0.0772	563.1
0.07724	555.4
0.07728	562.2
0.07732	555.4
0.07736	561.8
0.0774	556.4
0.07744	561.5
0.07748	557.2
0.07752	561.6
0.07756	557.7
0.0776	561.7
0.07764	558.5
0.07768	562.1
0.07772	558.9
0.07776	562.4
0.0778	559.7
0.07784	562.1
0.07788	560.6
0.07792	560.8
0.07796	561.8
0.078	559.6
0.07804	562.8
0.07808	558.2
0.07812	563.8
0.07816	556.6
0.0782	563.8
0.07824	555.4
0.07828	563.4
0.07832	555.3
0.07836	562.8
0.0784	554.9
0.07844	562.3
0.07848	555.6
0.07852	561.6
0.07856	556.8
0.0786	561.3
0.07864	557.4
0.07868	561.3
0.07872	558
0.07876	561.8
0.0788	558.4
0.07884	562.1
0.07888	559.3
0.07892	562.2
0.07896	559.6
0.079	561.7
0.07904	561
0.07908	560.6
0.07912	562
0.07916	559.1
0.0792	563.2
0.07924	557.7
0.07928	563.9
0.07932	556.1
0.07936	563.6
0.0794	555.6
0.07944	563.2
0.07948	554.9
0.07952	562.8
0.07956	555.4
0.0796	561.7
0.07964	556
0.07968	561.6
0.07972	556.8
0.07976	561.3
0.0798	557.9
0.07984	561.4
0.07988	558.5
0.07992	561.7
[truncated: 98,001 more rows]

## Sheet: Sheet1
		100	50
time	data	butfilt1	Strain
0.472	38.47	36.227	0.27546
0.47204	37.42	36.1587	0.276827
0.47208	38.9	36.0893	0.278213
0.47212	35.7	36.019	0.27962
0.47216	39.19	35.9477	0.281045
0.4722	34.45	35.8755	0.28249
0.47224	39.14	35.8023	0.283953
0.47228	33.3	35.7282	0.285436
0.47232	38.57	35.6532	0.286937
0.47236	33.02	35.5772	0.288456
0.4724	38.14	35.5003	0.289993
0.47244	32.87	35.4226	0.291549
0.47248	37.37	35.3439	0.293122
0.47252	32.78	35.2644	0.294712
0.47256	36.7	35.184	0.29632
0.4726	33.3	35.1028	0.297944
0.47264	36.32	35.0207	0.299586
0.47268	33.11	34.9378	0.301244
0.47272	36.61	34.8541	0.302918
0.47276	33.3	34.7696	0.304609
0.4728	36.94	34.6843	0.306315
0.47284	33.78	34.5981	0.308037
0.47288	37.18	34.5113	0.309775
0.47292	33.93	34.4236	0.311528
0.47296	36.37	34.3352	0.313295
0.473	34.64	34.2461	0.315078
0.47304	35.55	34.1562	0.316876
0.47308	35.31	34.0656	0.318687
0.47312	33.97	33.9744	0.320513
0.47316	36.32	33.8824	0.322352
0.4732	33.11	33.7897	0.324205
0.47324	36.41	33.6964	0.326071
0.47328	31.48	33.6025	0.32795
0.47332	36.27	33.5079	0.329842
0.47336	30.72	33.4127	0.331745
0.4734	35.03	33.3169	0.333661
0.47344	29.95	33.2206	0.335589
0.47348	35.27	33.1236	0.337528
0.47352	29.62	33.0261	0.339478
0.47356	34.31	32.9281	0.341439
0.4736	29.66	32.8295	0.34341
0.47364	34.07	32.7304	0.345392
0.47368	29.76	32.6308	0.347383
0.47372	33.64	32.5308	0.349384
0.47376	30	32.4302	0.351395
0.4738	34.21	32.3292	0.353415
0.47384	30.57	32.2278	0.355444
0.47388	33.69	32.1259	0.357482
0.47392	30.77	32.0236	0.359528
0.47396	33.59	31.9209	0.361583
0.474	30.67	31.8177	0.363645
0.47404	33.64	31.7142	0.365715
0.47408	31.58	31.6103	0.367793
0.47412	32.58	31.5061	0.369878
0.47416	32.2	31.4015	0.37197
0.4742	31.24	31.2966	0.374069
0.47424	32.92	31.1913	0.376174
0.47428	30.05	31.0857	0.378286
0.47432	33.11	30.9799	0.380403
0.47436	28.32	30.8737	0.382526
0.4744	33.35	30.7673	0.384654
0.47444	27.18	30.6606	0.386787
0.47448	32.92	30.5537	0.388925
0.47452	26.75	30.4466	0.391068
0.47456	31.91	30.3393	0.393214
0.4746	26.7	30.2318	0.395365
0.47464	31.01	30.124	0.397519
0.47468	26.94	30.0161	0.399677
0.47472	30.67	29.9081	0.401838
0.47476	26.84	29.7999	0.404002
0.4748	30.38	29.6916	0.406169
0.47484	27.13	29.5831	0.408338
0.47488	30.67	29.4745	0.410509
0.47492	27.22	29.3659	0.412683
0.47496	30.77	29.2571	0.414858
0.475	27.42	29.1482	0.417036
0.47504	30.48	29.0393	0.419214
0.47508	27.7	28.9303	0.421394
0.47512	30.53	28.8212	0.423576
0.47516	28.52	28.7121	0.425758
0.4752	29.57	28.6029	0.427941
0.47524	29.52	28.4938	0.430125
0.47528	27.99	28.3846	0.432309
0.47532	30.24	28.2754	0.434493
0.47536	26.89	28.1662	0.436677
0.4754	30.05	28.057	0.438861
0.47544	25.74	27.9478	0.441044
0.47548	29.71	27.8387	0.443227
0.47552	24.69	27.7296	0.445408
0.47556	29.28	27.6206	0.447589
0.4756	23.92	27.5116	0.449768
0.47564	28.52	27.4027	0.451945
0.47568	23.83	27.2939	0.454121
0.47572	28.37	27.1852	0.456295
0.47576	23.83	27.0767	0.458467
0.4758	27.7	26.9682	0.460636
0.47584	23.73	26.8598	0.462803
0.47588	27.46	26.7516	0.464967
0.47592	24.64	26.6436	0.467129
0.47596	27.65	26.5356	0.469288
0.476	23.97	26.4278	0.471443
0.47604	27.65	26.3202	0.473596
0.47608	24.11	26.2128	0.475745
0.47612	27.75	26.1055	0.477891
0.47616	24.69	25.9984	0.480033
0.4762	27.37	25.8914	0.482171
0.47624	25.4	25.7847	0.484306
0.47628	26.75	25.6781	0.486437
0.47632	26.46	25.5718	0.488565
0.47636	25.12	25.4656	0.490688
0.4764	26.94	25.3597	0.492806
0.47644	23.73	25.254	0.494921
0.47648	27.32	25.1485	0.497031
0.47652	22.25	25.0432	0.499136
0.47656	27.46	24.9382	0.501236
0.4766	21.48	24.8334	0.503332
0.47664	26.27	24.7289	0.505422
0.47668	21.34	24.6246	0.507508
0.47672	26.17	24.5206	0.509588
0.47676	20.57	24.4169	0.511662
0.4768	25.55	24.3134	0.513731
0.47684	21.38	24.2103	0.515795
0.47688	24.93	24.1074	0.517852
0.47692	20.95	24.0048	0.519904
0.47696	24.69	23.9025	0.52195
0.477	21.29	23.8005	0.52399
0.47704	24.88	23.6988	0.526025
0.47708	21.48	23.5974	0.528053
0.47712	25.02	23.4963	0.530075
0.47716	21.53	23.3955	0.53209
0.4772	25.26	23.295	0.5341
0.47724	21.62	23.1948	0.536103
0.47728	25.26	23.095	0.538101
0.47732	23.3	22.9954	0.540091
0.47736	23.59	22.8962	0.542076
0.4774	23.68	22.7973	0.544054
0.47744	23.3	22.6987	0.546025
0.47748	24.02	22.6005	0.54799
0.47752	21.62	22.5026	0.549949
0.47756	24.73	22.405	0.5519
0.4776	20.52	22.3077	0.553845
0.47764	24.73	22.2108	0.555783
0.47768	19.18	22.1143	0.557714
0.47772	24.3	22.0181	0.559638
0.47776	19.04	21.9222	0.561555
0.4778	24.06	21.8268	0.563465
0.47784	18.61	21.7317	0.565367
0.47788	23.3	21.6369	0.567262
0.47792	18.75	21.5425	0.569149
0.47796	22.44	21.4486	0.571029
0.478	18.42	21.355	0.572901
0.47804	22.34	21.2617	0.574765
0.47808	18.94	21.1689	0.576622
0.47812	22.53	21.0764	0.578471
0.47816	18.89	20.9844	0.580312
0.4782	22.34	20.8927	0.582146
0.47824	19.47	20.8014	0.583971
0.47828	22.82	20.7106	0.585789
0.47832	18.99	20.6201	0.587598
0.47836	22.77	20.53	0.5894
0.4784	20	20.4403	0.591193
0.47844	21.62	20.3511	0.592979
0.47848	21.14	20.2622	0.594756
0.47852	20.52	20.1737	0.596525
0.47856	21.96	20.0857	0.598286
0.4786	19.23	19.9981	0.600038
0.47864	22.25	19.9109	0.601783
0.47868	17.94	19.8241	0.603518
0.47872	22.48	19.7377	0.605245
0.47876	17.17	19.6518	0.606964
0.4788	22.05	19.5663	0.608673
0.47884	16.5	19.4813	0.610374
0.47888	21.14	19.3967	0.612066
0.47892	16.36	19.3126	0.613749
0.47896	20.67	19.2289	0.615422
0.479	16.45	19.1457	0.617087
0.47904	20.28	19.0629	0.618742
0.47908	15.93	18.9806	0.620388
0.47912	20.43	18.8988	0.622025
0.47916	16.55	18.8174	0.623652
0.4792	20.33	18.7365	0.625269
0.47924	16.6	18.6561	0.626877
0.47928	20.09	18.5762	0.628476
0.47932	16.98	18.4968	0.630065
0.47936	20.33	18.4178	0.631644
0.4794	17.46	18.3393	0.633214
0.47944	20.71	18.2613	0.634774
0.47948	17.79	18.1838	0.636324
0.47952	19.8	18.1068	0.637864
0.47956	18.75	18.0303	0.639394
0.4796	18.89	17.9543	0.640915
0.47964	19.52	17.8787	0.642425
0.47968	16.93	17.8037	0.643925
0.47972	19.95	17.7292	0.645415
0.47976	16.36	17.6553	0.646895
0.4798	19.95	17.5818	0.648364
0.47984	14.92	17.5089	0.649822
0.47988	19.52	17.4365	0.65127
0.47992	13.92	17.3646	0.652708
0.47996	19.23	17.2933	0.654134
0.48	14.06	17.2225	0.655549
0.48004	18.8	17.1523	0.656954
0.48008	13.92	17.0826	0.658347
0.48012	18.13	17.0135	0.659729
0.48016	14.25	16.945	0.6611
0.4802	17.94	16.877	0.662459
0.48024	14.35	16.8096	0.663807
0.48028	17.41	16.7428	0.665144
0.48032	14.59	16.6766	0.666469
0.48036	18.22	16.6109	0.667782
0.4804	14.59	16.5458	0.669084
0.48044	18.13	16.4813	0.670375
0.48048	15.02	16.4173	0.671653
0.48052	18.27	16.354	0.67292
0.48056	15.64	16.2912	0.674175
0.4806	17.79	16.2291	0.675419
0.48064	16.36	16.1675	0.676651
0.48068	16.98	16.1065	0.67787
0.48072	17.36	16.0461	0.679078
0.48076	15.4	15.9863	0.680274
0.4808	17.99	15.9271	0.681458
0.48084	14.63	15.8685	0.68263
0.48088	18.13	15.8105	0.68379
0.48092	13.29	15.7532	0.684937
0.48096	17.79	15.6964	0.686072
0.481	12.77	15.6403	0.687195
0.48104	17.55	15.5848	0.688305
0.48108	12.05	15.5299	0.689402
0.48112	16.93	15.4756	0.690487
0.48116	11.81	15.422	0.691559
0.4812	16.65	15.3691	0.692619
0.48124	12.53	15.3167	0.693666
0.48128	16.31	15.265	0.694699
0.48132	12.53	15.214	0.69572
0.48136	16.12	15.1636	0.696729
0.4814	12.86	15.1138	0.697724
0.48144	16.6	15.0647	0.698706
0.48148	13.29	15.0162	0.699675
0.48152	16.69	14.9684	0.700632
0.48156	13.25	14.9212	0.701575
0.4816	16.79	14.8747	0.702506
0.48164	14.11	14.8288	0.703423
0.48168	16.21	14.7836	0.704328
0.48172	14.63	14.739	0.70522
0.48176	15.59	14.6951	0.706098
0.4818	15.97	14.6518	0.706964
0.48184	14.3	14.6092	0.707817
0.48188	16.5	14.5672	0.708656
0.48192	13.2	14.5259	0.709483
0.48196	16.98	14.4852	0.710296
0.482	12	14.4452	0.711096
0.48204	16.84	14.4059	0.711883
0.48208	11.43	14.3672	0.712657
0.48212	16.36	14.3292	0.713417
0.48216	11.19	14.2918	0.714164
0.4822	16.02	14.2551	0.714897
0.48224	11	14.2191	0.715617
0.48228	15.54	14.1838	0.716324
0.48232	10.76	14.1492	0.717017
0.48236	15.26	14.1152	0.717696
0.4824	11.57	14.0819	0.718362
0.48244	15.21	14.0493	0.719014
0.48248	11.81	14.0173	0.719653
0.48252	15.02	13.9861	0.720279
0.48256	11.76	13.9555	0.720891
0.4826	15.69	13.9256	0.721489
0.48264	12.24	13.8963	0.722074
0.48268	15.97	13.8677	0.722645
0.48272	12.72	13.8398	0.723203
0.48276	15.69	13.8126	0.723748
0.4828	13.73	13.786	0.724279
0.48284	15.02	13.7602	0.724797
0.48288	14.49	13.7349	0.725301
0.48292	13.53	13.7104	0.725793
0.48296	15.45	13.6865	0.72627
0.483	12.43	13.6633	0.726735
0.48304	15.64	13.6407	0.727185
0.48308	11.57	13.6189	0.727623
0.48312	15.97	13.5977	0.728047
0.48316	10.37	13.5771	0.728457
0.4832	15.3	13.5573	0.728855
0.48324	10.66	13.5381	0.729238
0.48328	14.97	13.5196	0.729608
0.48332	10.14	13.5018	0.729965
0.48336	14.49	13.4846	0.730308
0.4834	10.18	13.4681	0.730637
0.48344	14.87	13.4523	0.730953
0.48348	10.42	13.4372	0.731256
0.48352	14.16	13.4228	0.731545
0.48356	11	13.409	0.731821
0.4836	14.49	13.3958	0.732083
0.48364	11.38	13.3834	0.732332
0.48368	14.97	13.3716	0.732568
0.48372	12.29	13.3604	0.732791
0.48376	14.87	13.35	0.733001
0.4838	12.15	13.3401	0.733198
0.48384	15.3	13.3309	0.733381
0.48388	12.29	13.3224	0.733552
0.48392	14.63	13.3145	0.73371
0.48396	13.87	13.3072	0.733855
0.484	13.96	13.3006	0.733988
0.48404	14.68	13.2946	0.734107
0.48408	12.43	13.2893	0.734214
0.48412	15.35	13.2846	0.734309
0.48416	10.95	13.2805	0.734391
0.4842	15.74	13.277	0.73446
0.48424	10.28	13.2742	0.734516
0.48428	15.5	13.272	0.734561
0.48432	10.18	13.2704	0.734592
0.48436	14.87	13.2694	0.734611
0.4844	9.465	13.2691	0.734618
0.48444	15.02	13.2694	0.734612
0.48448	9.8	13.2703	0.734594
0.48452	14.25	13.2718	0.734563
0.48456	10.37	13.274	0.734521
0.4846	14.01	13.2767	0.734466
0.48464	10.71	13.28	0.734399
0.48468	14.25	13.284	0.73432
0.48472	11.28	13.2885	0.73423
0.48476	14.59	13.2936	0.734127
0.4848	11.71	13.2993	0.734013
0.48484	14.83	13.3056	0.733888
0.48488	11.91	13.3125	0.73375
0.48492	15.74	13.3199	0.733602
0.48496	12.62	13.3279	0.733442
0.485	14.35	13.3364	0.733272
0.48504	13.92	13.3455	0.73309
0.48508	13.44	13.3551	0.732897
0.48512	14.83	13.3653	0.732694
0.48516	12.82	13.376	0.73248
0.4852	15.5	13.3873	0.732255
0.48524	11.95	13.399	0.732019
0.48528	15.69	13.4113	0.731773
0.48532	10.57	13.4242	0.731517
0.48536	16.41	13.4375	0.73125
0.4854	10.28	13.4514	0.730973
0.48544	15.07	13.4657	0.730686
0.48548	9.944	13.4806	0.730388
0.48552	14.63	13.496	0.730081
0.48556	10.18	13.5118	0.729763
0.4856	14.54	13.5282	0.729436
0.48564	10.85	13.5451	0.729099
0.48568	14.44	13.5624	0.728752
0.48572	10.95	13.5802	0.728395
0.48576	14.78	13.5985	0.72803
0.4858	11.71	13.6173	0.727655
0.48584	15.07	13.6365	0.72727
0.48588	11.76	13.6561	0.726877
0.48592	15.54	13.6762	0.726475
0.48596	12.62	13.6968	0.726064
0.486	15.5	13.7177	0.725645
0.48604	13.58	13.7391	0.725217
0.48608	15.11	13.7609	0.724781
0.48612	14.11	13.7831	0.724337
0.48616	14.68	13.8057	0.723885
0.4862	15.16	13.8287	0.723425
0.48624	13.58	13.8521	0.722957
0.48628	16.21	13.8759	0.722482
0.48632	12.15	13.9001	0.721999
0.48636	16.65	13.9246	0.721508
0.4864	11.52	13.9495	0.72101
0.48644	16.5	13.9748	0.720505
0.48648	11.71	14.0004	0.719992
0.48652	16.17	14.0264	0.719472
0.48656	10.81	14.0527	0.718946
0.4866	15.93	14.0794	0.718412
0.48664	11.04	14.1064	0.717871
0.48668	15.07	14.1338	0.717324
0.48672	12.05	14.1615	0.71677
0.48676	15.02	14.1895	0.71621
0.4868	11.76	14.2179	0.715643
0.48684	15.59	14.2465	0.71507
0.48688	12.05	14.2755	0.71449
0.48692	16.36	14.3048	0.713905
0.48696	12.58	14.3343	0.713313
0.487	16.21	14.3642	0.712716
0.48704	13.73	14.3943	0.712114
0.48708	16.65	14.4247	0.711505
0.48712	14.01	14.4554	0.710892
0.48716	15.97	14.4864	0.710273
0.4872	14.73	14.5176	0.709649
0.48724	16.12	14.549	0.70902
0.48728	15.69	14.5807	0.708386
0.48732	14.97	14.6126	0.707747
0.48736	16.6	14.6448	0.707104
0.4874	14.2	14.6772	0.706455
0.48744	17.32	14.7099	0.705803
0.48748	12.77	14.7427	0.705145
0.48752	17.75	14.7758	0.704483
0.48756	12.48	14.8091	0.703817
0.4876	17.27	14.8427	0.703146
0.48764	11.91	14.8764	0.702471
0.48768	17.12	14.9104	0.701792
0.48772	11.71	14.9446	0.701109
0.48776	16.6	14.979	0.700421
0.4878	12.19	15.0135	0.699729
0.48784	16.65	15.0483	0.699033
0.48788	12.48	15.0833	0.698334
0.48792	16.6	15.1185	0.69763
0.48796	12.86	15.1539	0.696922
0.488	16.79	15.1894	0.696211
0.48804	13.34	15.2252	0.695496
0.48808	17.12	15.2611	0.694778
0.48812	14.06	15.2972	0.694056
0.48816	17.32	15.3335	0.693331
0.4882	14.4	15.3699	0.692602
0.48824	17.89	15.4065	0.69187
0.48828	15.21	15.4432	0.691135
0.48832	16.88	15.4801	0.690397
0.48836	16.5	15.5172	0.689656
0.4884	16.26	15.5544	0.688913
0.48844	17.51	15.5917	0.688166
0.48848	14.87	15.6292	0.687416
0.48852	17.99	15.6668	0.686664
0.48856	13.92	15.7046	0.685908
0.4886	18.13	15.7425	0.68515
0.48864	13.39	15.7805	0.684389
0.48868	18.37	15.8187	0.683626
0.48872	12.86	15.857	0.682859
0.48876	18.03	15.8955	0.68209
0.4888	12.38	15.9341	0.681319
0.48884	17.89	15.9728	0.680544
0.48888	12.82	16.0116	0.679767
0.48892	17.36	16.0506	0.678988
0.48896	13.34	16.0897	0.678206
0.489	17.41	16.1289	0.677421
0.48904	14.06	16.1683	0.676634
0.48908	17.41	16.2078	0.675845
0.48912	14.11	16.2473	0.675053
0.48916	18.03	16.287	0.674259
0.4892	15.02	16.3268	0.673463
0.48924	18.42	16.3667	0.672665
0.48928	15.5	16.4067	0.671865
0.48932	18.42	16.4469	0.671063
0.48936	16.07	16.4871	0.670259
0.4894	17.99	16.5274	0.669453
0.48944	16.88	16.5677	0.668645
0.48948	17.22	16.6082	0.667836
0.48952	18.18	16.6488	0.667025
0.48956	16.17	16.6894	0.666212
0.4896	18.94	16.7301	0.665397
0.48964	15.02	16.7709	0.664581
0.48968	19.23	16.8118	0.663763
0.48972	14.3	16.8528	0.662944
0.48976	19.28	16.8938	0.662123
0.4898	14.06	16.935	0.661301
0.48984	18.85	16.9762	0.660476
0.48988	13.92	17.0175	0.659651
0.48992	18.03	17.0588	0.658824
0.48996	13.82	17.1002	0.657995
0.49	18.61	17.1417	0.657165
0.49004	13.92	17.1833	0.656334
0.49008	18.27	17.225	0.655501
0.49012	14.63	17.2667	0.654667
0.49016	18.51	17.3084	0.653831
0.4902	15.3	17.3503	0.652995
0.49024	18.66	17.3921	0.652157
0.49028	15.97	17.4341	0.651319
0.49032	19.95	17.476	0.65048
0.49036	16.17	17.518	0.649639
0.4904	19.66	17.5601	0.648799
0.49044	16.65	17.6022	0.647957
0.49048	19.47	17.6443	0.647115
0.49052	17.99	17.6864	0.646272
0.49056	18.8	17.7285	0.645429
0.4906	19.28	17.7707	0.644586
0.49064	17.46	17.8129	0.643742
0.49068	19.71	17.8551	0.642898
0.49072	16.74	17.8973	0.642053
0.49076	20.38	17.9396	0.641208
0.4908	16.02	17.9818	0.640364
0.49084	20.47	18.0241	0.639518
0.49088	15.11	18.0663	0.638673
0.49092	20.47	18.1086	0.637828
0.49096	14.68	18.1509	0.636982
0.491	20.19	18.1932	0.636136
0.49104	15.02	18.2355	0.635291
0.49108	19.61	18.2778	0.634445
0.49112	15.54	18.32	0.633599
0.49116	19.56	18.3623	0.632753
0.4912	15.93	18.4046	0.631908
0.49124	19.76	18.4469	0.631062
0.49128	16.65	18.4891	0.630217
0.49132	20.04	18.5314	0.629372
0.49136	16.93	18.5736	0.628528
0.4914	20.24	18.6158	0.627684
0.49144	17.7	18.658	0.62684
0.49148	21.14	18.7001	0.625997
0.49152	18.08	18.7422	0.625155
0.49156	20.86	18.7843	0.624314
0.4916	18.85	18.8264	0.623473
0.49164	20.14	18.8684	0.622633
0.49168	19.95	18.9103	0.621794
0.49172	19.13	18.9522	0.620955
0.49176	21.48	18.9941	0.620118
0.4918	18.13	19.0359	0.619282
0.49184	21.67	19.0777	0.618446
0.49188	17.03	19.1194	0.617612
0.49192	22.1	19.1611	0.616779
0.49196	16.65	19.2027	0.615946
0.492	21.91	19.2443	0.615114
0.49204	16.21	19.2858	0.614284
0.49208	21.24	19.3273	0.613454
0.49212	16.5	19.3687	0.612625
0.49216	21	19.4101	0.611797
0.4922	16.6	19.4515	0.610971
0.49224	21	19.4928	0.610145
0.49228	16.88	19.534	0.60932
0.49232	20.95	19.5752	0.608495
0.49236	17.27	19.6164	0.607672
0.4924	21.53	19.6575	0.60685
0.49244	17.94	19.6985	0.60603
0.49248	21.29	19.7395	0.60521
0.49252	18.51	19.7804	0.604391
0.49256	21.72	19.8213	0.603574
0.4926	19.47	19.8621	0.602757
0.49264	22.01	19.9029	0.601942
0.49268	19.85	19.9436	0.601128
0.49272	21.53	19.9842	0.600316
0.49276	20.76	20.0248	0.599504
0.4928	20.95	20.0653	0.598694
0.49284	21.77	20.1057	0.597886
0.49288	19.66	20.1461	0.597078
0.49292	22.34	20.1864	0.596272
0.49296	18.18	20.2267	0.595467
0.493	23.11	20.2669	0.594663
0.49304	17.55	20.307	0.59386
0.49308	23.11	20.3471	0.593058
0.49312	17.6	20.3871	0.592257
0.49316	22.34	20.4271	0.591458
0.4932	17.27	20.4671	0.590659
0.49324	22.15	20.5069	0.589861
0.49328	17.84	20.5468	0.589064
0.49332	22.05	20.5866	0.588268
0.49336	18.13	20.6263	0.587473
0.4934	21.67	20.666	0.586679
0.49344	18.42	20.7057	0.585886
0.49348	21.96	20.7453	0.585093
0.49352	18.89	20.7849	0.584302
0.49356	22.96	20.8245	0.583511
0.4936	19.23	20.8639	0.582721
0.49364	22.72	20.9034	0.581932
0.49368	19.71	20.9428	0.581144
0.49372	23.11	20.9821	0.580357
0.49376	20.57	21.0215	0.579571
0.4938	22.82	21.0607	0.578785
0.49384	21.86	21.0999	0.578001
0.49388	22.05	21.1391	0.577218
0.49392	22.48	21.1783	0.576435
0.49396	20.71	21.2174	0.575653
0.494	23.68	21.2564	0.574872
0.49404	19.33	21.2954	0.574091
0.49408	23.63	21.3344	0.573312
0.49412	18.8	21.3734	0.572533
0.49416	23.92	21.4123	0.571754
0.4942	18.46	21.4512	0.570976
0.49424	23.68	21.4901	0.570199
0.49428	18.37	21.5289	0.569422
0.49432	23.73	21.5677	0.568645
0.49436	18.03	21.6066	0.567869
0.4944	23.25	21.6454	0.567093
0.49444	19.28	21.6841	0.566317
0.49448	22.72	21.7229	0.565542
0.49452	19.04	21.7617	0.564767
0.49456	22.96	21.8004	0.563992
0.4946	19.37	21.8391	0.563217
0.49464	23.44	21.8779	0.562443
0.49468	19.95	21.9166	0.561669
0.49472	23.73	21.9553	0.560895
0.49476	20.71	21.994	0.560121
0.4948	24.06	22.0326	0.559347
0.49484	21.67	22.0713	0.558574
0.49488	24.35	22.1099	0.557801
0.49492	22.44	22.1486	0.557029
0.49496	23.15	22.1872	0.556256
0.495	23.06	22.2258	0.555484
0.49504	22.2	22.2644	0.554712
0.49508	23.92	22.303	0.553941
0.49512	21	22.3416	0.553169
0.49516	24.93	22.3801	0.552397
0.4952	19.76	22.4187	0.551626
0.49524	24.83	22.4573	0.550854
0.49528	19.47	22.4959	0.550083
0.49532	25.4	22.5344	0.549311
0.49536	19.13	22.573	0.548539
0.4954	24.11	22.6116	0.547767
0.49544	19.47	22.6502	0.546995
0.49548	23.92	22.6889	0.546223
0.49552	19.71	22.7275	0.54545
0.49556	24.06	22.7661	0.544677
0.4956	20	22.8048	0.543904
0.49564	23.92	22.8435	0.54313
0.49568	20.14	22.8822	0.542357
0.49572	24.54	22.9209	0.541583
0.49576	21.43	22.9596	0.540808
0.4958	24.83	22.9983	0.540034
0.49584	21.62	23.037	0.539259
0.49588	24.93	23.0758	0.538484
0.49592	22.34	23.1145	0.537709
0.49596	25.31	23.1533	0.536934
0.496	23.39	23.1921	0.536159
0.49604	24.21	23.2308	0.535383
0.49608	24.4	23.2696	0.534608
0.49612	23.2	23.3084	0.533832
0.49616	25.12	23.3472	0.533056
0.4962	21.86	23.386	0.53228
0.49624	26.12	23.4248	0.531503
0.49628	21.38	23.4637	0.530727
0.49632	26.31	23.5025	0.52995
0.49636	20.14	23.5414	0.529172
0.4964	26.41	23.5803	0.528395
0.49644	20.09	23.6192	0.527616
0.49648	25.5	23.6581	0.526838
0.49652	20.14	23.6971	0.526059
0.49656	25.55	23.736	0.525279
0.4966	20.76	23.775	0.524499
0.49664	25.07	23.8141	0.523719
0.49668	20.81	23.8531	0.522938
0.49672	24.64	23.8922	0.522156
0.49676	21.34	23.9313	0.521375
0.4968	25.21	23.9704	0.520592
0.49684	22.44	24.0095	0.519809
0.49688	25.88	24.0487	0.519026
0.49692	22.68	24.0879	0.518242
0.49696	26.07	24.1271	0.517458
0.497	23.3	24.1663	0.516674
0.49704	26.12	24.2055	0.515889
0.49708	23.73	24.2448	0.515104
0.49712	25.4	24.284	0.514319
0.49716	24.83	24.3233	0.513534
0.4972	24.73	24.3626	0.512748
0.49724	26.41	24.4019	0.511962
0.49728	23.54	24.4412	0.511176
0.49732	26.84	24.4805	0.51039
0.49736	22.53	24.5198	0.509603
0.4974	27.27	24.5592	0.508816
0.49744	21.62	24.5985	0.508029
0.49748	27.13	24.6379	0.507241
0.49752	21.62	24.6773	0.506454
0.49756	26.89	24.7167	0.505665
0.4976	21.43	24.7562	0.504877
0.49764	26.17	24.7956	0.504088
0.49768	22.01	24.8351	0.503298
0.49772	26.22	24.8746	0.502508
0.49776	22.48	24.9141	0.501718
0.4978	26.36	24.9536	0.500927
0.49784	23.11	24.9932	0.500136
0.49788	26.36	25.0328	0.499345
0.49792	23.39	25.0723	0.498553
0.49796	27.03	25.1119	0.497761
0.498	23.39	25.1515	0.496969
0.49804	27.32	25.1912	0.496176
0.49808	24.16	25.2308	0.495384
0.49812	27.32	25.2705	0.494591
0.49816	24.83	25.3101	0.493798
0.4982	26.89	25.3498	0.493004
0.49824	25.98	25.3895	0.492211
0.49828	26.17	25.4292	0.491417
0.49832	26.98	25.4689	0.490623
0.49836	25.21	25.5086	0.489829
0.4984	27.75	25.5483	0.489034
0.49844	24.02	25.588	0.488239
0.49848	28.18	25.6278	0.487444
0.49852	23.15	25.6675	0.486649
0.49856	28.28	25.7073	0.485853
0.4986	22.96	25.7471	0.485057
0.49864	27.85	25.787	0.48426
0.49868	22.29	25.8268	0.483463
0.49872	27.65	25.8667	0.482666
0.49876	22.63	25.9066	0.481867
0.4988	27.22	25.9466	0.481069
0.49884	23.59	25.9865	0.480269
0.49888	27.65	26.0265	0.479469
0.49892	23.63	26.0666	0.478669
0.49896	27.42	26.1066	0.477867
0.499	23.78	26.1467	0.477066
0.49904	27.99	26.1868	0.476263
0.49908	24.35	26.227	0.47546
0.49912	28.47	26.2672	0.474657
0.49916	24.83	26.3074	0.473853
0.4992	28.61	26.3476	0.473048
0.49924	25.84	26.3879	0.472243
0.49928	28.23	26.4281	0.471437
0.49932	27.18	26.4684	0.470631
0.49936	27.37	26.5088	0.469824
0.4994	27.85	26.5492	0.469017
0.49944	26.41	26.5896	0.468209
0.49948	28.8	26.63	0.4674
0.49952	24.93	26.6704	0.466591
0.49956	28.99	26.7109	0.465781
0.4996	24.35	26.7515	0.46497
0.49964	29.52	26.7921	0.464159
0.49968	23.63	26.8327	0.463346
0.49972	28.9	26.8733	0.462533
0.49976	23.83	26.9141	0.461719
0.4998	28.66	26.9548	0.460904
0.49984	23.25	26.9956	0.460087
0.49988	28.66	27.0365	0.45927
0.49992	24.21	27.0774	0.458452
0.49996	28.47	27.1184	0.457632
0.5	24.21	27.1594	0.456812
0.50004	28.23	27.2005	0.45599
0.50008	25.12	27.2416	0.455167
0.50012	28.61	27.2828	0.454343
0.50016	25.6	27.3241	0.453519
0.5002	28.99	27.3654	0.452693
0.50024	26.7	27.4067	0.451866
0.50028	29.47	27.4481	0.451038
0.50032	26.7	27.4895	0.450209
0.50036	29.19	27.531	0.449379
0.5004	27.51	27.5726	0.448548
0.50044	28.28	27.6142	0.447717
0.50048	28.28	27.6558	0.446884
0.50052	27.22	27.6975	0.44605
0.50056	29.81	27.7392	0.445215
0.5006	26.46	27.781	0.444379
0.50064	30	27.8229	0.443542
0.50068	25.55	27.8648	0.442704
0.50072	30.38	27.9067	0.441865
0.50076	24.88	27.9487	0.441025
0.5008	30.38	27.9908	0.440184
0.50084	24.73	28.0329	0.439342
0.50088	30.19	28.0751	0.438498
0.50092	24.45	28.1173	0.437653
0.50096	29.14	28.1596	0.436807
0.501	25.12	28.202	0.43596
0.50104	29.14	28.2444	0.435111
0.50108	25.45	28.2869	0.434262
0.50112	29.52	28.3294	0.433411
0.50116	26.12	28.372	0.432559
0.5012	29.9	28.4147	0.431706
0.50124	26.36	28.4574	0.430852
0.50128	30.14	28.5001	0.429998
0.50132	27.13	28.5429	0.429142
0.50136	30.53	28.5858	0.428285
0.5014	27.75	28.6286	0.427427
0.50144	30.38	28.6716	0.426569
0.50148	28.71	28.7145	0.42571
0.50152	29.62	28.7575	0.42485
0.50156	29.76	28.8005	0.423989
0.5016	28.76	28.8436	0.423128
0.50164	30.81	28.8867	0.422266
0.50168	27.65	28.9298	0.421403
0.50172	31.48	28.973	0.42054
0.50176	27.37	29.0162	0.419676
0.5018	31.63	29.0594	0.418812
0.50184	26.46	29.1027	0.417947
0.50188	31.53	29.146	0.417081
0.50192	25.93	29.1893	0.416214
0.50196	31.24	29.2326	0.415347
0.502	26.03	29.276	0.414479
0.50204	30.91	29.3194	0.413611
0.50208	26.22	29.3629	0.412742
0.50212	30.38	29.4064	0.411873
0.50216	26.65	29.4499	0.411002
0.5022	30.81	29.4934	0.410132
0.50224	26.98	29.537	0.40926
0.50228	30.96	29.5806	0.408389
0.50232	27.7	29.6242	0.407517
0.50236	31.68	29.6678	0.406644
0.5024	28.37	29.7114	0.405771
0.50244	31.82	29.7551	0.404898
0.50248	28.9	29.7987	0.404025
0.50252	32.06	29.8424	0.403152
0.50256	29.81	29.8861	0.402279
0.5026	31.44	29.9297	0.401405
0.50264	31.05	29.9734	0.400532
0.50268	30.53	30.0171	0.399658
0.50272	31.91	30.0608	0.398785
0.50276	29.28	30.1044	0.397911
0.5028	32.58	30.1481	0.397038
0.50284	28.61	30.1918	0.396164
0.50288	33.06	30.2355	0.395291
0.50292	27.7	30.2791	0.394417
0.50296	32.92	30.3228	0.393543
0.503	27.75	30.3665	0.39267
0.50304	32.35	30.4102	0.391796
0.50308	27.42	30.4539	0.390922
0.50312	32.3	30.4976	0.390048
0.50316	27.32	30.5413	0.389174
0.5032	31.87	30.585	0.3883
0.50324	27.7	30.6287	0.387425
0.50328	32.11	30.6725	0.386551
0.50332	28.23	30.7162	0.385676
0.50336	32.2	30.7599	0.384801
0.5034	28.85	30.8037	0.383926
0.50344	32.68	30.8474	0.383052
0.50348	29.62	30.8912	0.382177
0.50352	33.06	30.9349	0.381302
0.50356	29.81	30.9786	0.380427
0.5036	32.87	31.0224	0.379552
0.50364	30.67	31.0661	0.378678
0.50368	32.15	31.1098	0.377803
0.50372	31.53	31.1536	0.376929
0.50376	31.91	31.1973	0.376054
0.5038	32.68	31.241	0.37518
0.50384	30.86	31.2847	0.374306
0.50388	33.45	31.3284	0.373432
0.50392	29.9	31.3721	0.372558
0.50396	33.83	31.4158	0.371684
0.504	29.14	31.4595	0.37081
0.50404	33.83	31.5032	0.369936
0.50408	28.42	31.5469	0.369062
0.50412	33.64	31.5906	0.368188
0.50416	28.32	31.6343	0.367314
0.5042	33.69	31.678	0.36644
0.50424	28.52	31.7217	0.365566
0.50428	33.06	31.7654	0.364691
0.50432	28.9	31.8092	0.363817
0.50436	32.97	31.8529	0.362942
0.5044	29.43	31.8966	0.362068
0.50444	33.21	31.9404	0.361193
0.50448	30	31.9841	0.360318
0.50452	33.78	32.0278	0.359443
0.50456	30.19	32.0716	0.358569
0.5046	34.02	32.1153	0.357694
0.50464	30.67	32.159	0.356819
0.50468	34.16	32.2028	0.355944
0.50472	31.72	32.2465	0.35507
0.50476	33.64	32.2902	0.354196
0.5048	32.58	32.3339	0.353322
0.50484	33.4	32.3776	0.352448
0.50488	33.88	32.4213	0.351574
0.50492	32.06	32.465	0.3507
0.50496	34.6	32.5087	0.349827
0.505	30.96	32.5523	0.348954
0.50504	35.03	32.596	0.348081
0.50508	29.9	32.6396	0.347208
0.50512	34.98	32.6833	0.346335
0.50516	29.81	32.7269	0.345462
0.5052	35.31	32.7705	0.34459
0.50524	29.47	32.8141	0.343717
0.50528	34.36	32.8578	0.342845
0.50532	29.57	32.9014	0.341973
0.50536	34.07	32.945	0.3411
0.5054	30.34	32.9886	0.340228
0.50544	34.21	33.0322	0.339356
0.50548	30.86	33.0758	0.338484
0.50552	34.6	33.1194	0.337612
0.50556	30.57	33.163	0.336741
0.5056	34.6	33.2065	0.335869
0.50564	31.72	33.2501	0.334998
0.50568	35.07	33.2936	0.334127
0.50572	32.01	33.3372	0.333257
0.50576	35.12	33.3807	0.332387
0.5058	33.45	33.4242	0.331517
0.50584	34.93	33.4676	0.330648
0.50588	33.83	33.5111	0.329779
0.50592	34.79	33.5545	0.328911
0.50596	34.79	33.5979	0.328043
0.506	33.11	33.6412	0.327176
0.50604	36.13	33.6845	0.326309
0.50608	33.06	33.7279	0.325443
0.50612	36.08	33.7711	0.324577
0.50616	31.24	33.8144	0.323712
0.5062	36.32	33.8576	0.322848
0.50624	30.86	33.9008	0.321983
0.50628	36.61	33.944	0.32112
0.50632	30.05	33.9872	0.320256
0.50636	35.6	34.0303	0.319393
0.5064	30.86	34.0735	0.318531
0.50644	35.27	34.1166	0.317669
0.50648	31.44	34.1596	0.316807
0.50652	35.65	34.2027	0.315946
0.50656	31.77	34.2457	0.315085
0.5066	35.27	34.2887	0.314225
0.50664	32.3	34.3317	0.313365
0.50668	35.98	34.3747	0.312506
0.50672	32.54	34.4176	0.311648
0.50676	36.7	34.4605	0.31079
0.5068	33.25	34.5034	0.309932
0.50684	36.51	34.5462	0.309076
0.50688	33.88	34.589	0.30822
0.50692	36.27	34.6318	0.307365
0.50696	35.12	34.6745	0.306511
0.507	35.74	34.7171	0.305657
0.50704	36.22	34.7598	0.304805
0.50708	34.83	34.8023	0.303953
0.50712	37.04	34.8449	0.303102
0.50716	33.21	34.8874	0.302252
0.5072	37.32	34.9298	0.301403
0.50724	32.68	34.9723	0.300555
0.50728	37.8	35.0146	0.299707
0.50732	32.15	35.057	0.29886
0.50736	37.52	35.0993	0.298014
0.5074	31.68	35.1416	0.297169
0.50744	37.42	35.1838	0.296324
0.50748	32.06	35.226	0.29548
0.50752	37.18	35.2681	0.294637
0.50756	32.01	35.3103	0.293795
0.5076	36.94	35.3524	0.292953
0.50764	32.54	35.3944	0.292112
0.50768	36.51	35.4364	0.291271
0.50772	33.49	35.4784	0.290432
0.50776	36.8	35.5204	0.289593
0.5078	33.88	35.5623	0.288755
0.50784	37.28	35.6041	0.287917
0.50788	34.55	35.6459	0.287081
0.50792	37.66	35.6877	0.286245
0.50796	34.69	35.7295	0.285411
0.508	37.18	35.7711	0.284577
0.50804	35.74	35.8128	0.283744
0.50808	37.04	35.8544	0.282913
0.50812	36.99	35.8959	0.282082
0.50816	36.17	35.9374	0.281252
0.5082	38.28	35.9788	0.280423
0.50824	34.79	36.0202	0.279596
0.50828	38.52	36.0616	0.278769
0.50832	34.26	36.1029	0.277943
0.50836	38.81	36.1441	0.277118
0.5084	32.78	36.1853	0.276294
0.50844	38.9	36.2265	0.275471
0.50848	32.97	36.2676	0.274649
0.50852	38.42	36.3086	0.273827
0.50856	33.16	36.3497	0.273006
0.5086	38.04	36.3907	0.272187
0.50864	33.3	36.4316	0.271368
0.50868	37.42	36.4725	0.270549
0.50872	34.02	36.5134	0.269732
0.50876	37.71	36.5542	0.268915
0.5088	34.74	36.595	0.2681
0.50884	38.28	36.6358	0.267285
0.50888	34.36	36.6765	0.266471
0.50892	38.57	36.7171	0.265657
0.50896	34.93	36.7577	0.264845
0.509	39.33	36.7983	0.264034
0.50904	35.84	36.8388	0.263224
0.50908	38.76	36.8793	0.262415
0.50912	36.94	36.9197	0.261606
0.50916	38.57	36.96	0.260799
0.5092	37.95	37.0003	0.259993
0.50924	37.37	37.0406	0.259188
0.50928	38.9	37.0808	0.258384
0.50932	36.17	37.1209	0.257581
0.50936	39.19	37.161	0.25678
0.5094	35.31	37.2011	0.255979
0.50944	39.91	37.2411	0.255179
0.50948	34.16	37.281	0.25438
0.50952	39.72	37.3209	0.253581
0.50956	34.5	37.3608	0.252784
0.5096	39	37.4006	0.251988
0.50964	34.16	37.4404	0.251192
0.50968	38.86	37.4801	0.250397
0.50972	34.55	37.5198	0.249603
0.50976	39.05	37.5595	0.24881
0.5098	34.26	37.5991	0.248018
0.50984	38.71	37.6387	0.247226
0.50988	35.6	37.6782	0.246435
0.50992	39.33	37.7177	0.245645
0.50996	35.46	37.7572	0.244856
0.51	39.05	37.7966	0.244068
0.51004	36.61	37.836	0.243281
0.51008	39.72	37.8753	0.242494
0.51012	36.56	37.9146	0.241709
0.51016	40	37.9538	0.240925
0.5102	37.61	37.9929	0.240142
0.51024	39.91	38.032	0.239359
0.51028	38.71	38.0711	0.238578
0.51032	38.62	38.1101	0.237799
0.51036	39.96	38.149	0.23702
0.5104	37.42	38.1879	0.236242
0.51044	40.67	38.2267	0.235466
0.51048	36.7	38.2655	0.23469
0.51052	40.87	38.3042	0.233916
0.51056	35.6	38.3429	0.233143
0.5106	40.72	38.3815	0.23237
0.51064	35.46	38.42	0.231599
0.51068	40.48	38.4586	0.230829
0.51072	35.27	38.497	0.230059
0.51076	39.96	38.5354	0.229291
0.5108	35.41	38.5738	0.228524
0.51084	39.86	38.6121	0.227757
0.51088	36.08	38.6504	0.226992
0.51092	39.72	38.6887	0.226227
0.51096	36.46	38.7268	0.225463
0.511	40.1	38.765	0.224701
0.51104	36.56	38.8031	0.223939
0.51108	40.63	38.8411	0.223178
0.51112	36.99	38.8791	0.222419
0.51116	41.15	38.917	0.22166
0.5112	38.04	38.9549	0.220903
0.51124	41.25	38.9927	0.220147
0.51128	38.62	39.0304	0.219392
0.51132	40.72	39.0681	0.218638
0.51136	39.81	39.1057	0.217886
0.5114	39.62	39.1433	0.217134
0.51144	40.91	39.1808	0.216384
0.51148	38.86	39.2182	0.215636
0.51152	41.2	39.2556	0.214888
0.51156	37.66	39.2929	0.214142
0.5116	42.01	39.3302	0.213397
0.51164	37.18	39.3674	0.212653
0.51168	42.3	39.4045	0.21191
0.51172	36.13	39.4416	0.211168
0.51176	41.82	39.4786	0.210427
0.5118	36.32	39.5156	0.209687
0.51184	41.63	39.5526	0.208948
0.51188	36.41	39.5895	0.208211
0.51192	41.15	39.6263	0.207474
0.51196	36.61	39.6631	0.206738
0.512	40.53	39.6999	0.206003
0.51204	37.37	39.7366	0.205269
0.51208	41.2	39.7732	0.204535
0.51212	38.04	39.8098	0.203803
0.51216	40.91	39.8464	0.203072
0.5122	38.23	39.8829	0.202342
0.51224	41.73	39.9194	0.201612
0.51228	38.81	39.9558	0.200884
0.51232	42.25	39.9921	0.200157
0.51236	39.38	40.0285	0.199431
0.5124	42.11	40.0647	0.198706
0.51244	40.44	40.1009	0.197982
0.51248	41.06	40.1371	0.197259
0.51252	41.73	40.1731	0.196537
0.51256	39.76	40.2092	0.195816
0.5126	42.4	40.2452	0.195096
0.51264	38.71	40.2811	0.194378
0.51268	43.16	40.317	0.19366
0.51272	37.66	40.3529	0.192943
0.51276	42.88	40.3887	0.192227
0.5128	37.47	40.4244	0.191511
0.51284	42.78	40.4602	0.190797
0.51288	37.47	40.4958	0.190083
0.51292	42.35	40.5315	0.18937
0.51296	37.61	40.5671	0.188658
0.513	41.92	40.6027	0.187946
0.51304	37.56	40.6382	0.187235
0.51308	42.06	40.6737	0.186525
0.51312	38.09	40.7092	0.185815
0.51316	42.35	40.7447	0.185106
0.5132	38.04	40.7801	0.184398
0.51324	42.54	40.8155	0.18369
0.51328	39	40.8509	0.182983
0.51332	43.07	40.8862	0.182276
0.51336	39.67	40.9215	0.18157
0.5134	43.12	40.9567	0.180865
0.51344	40.44	40.992	0.180161
0.51348	42.3	41.0272	0.179457
0.51352	41.3	41.0623	0.178754
0.51356	42.25	41.0974	0.178051
0.5136	42.35	41.1325	0.177349
0.51364	41.44	41.1676	0.176648
0.51368	43.16	41.2026	0.175948
0.51372	40.44	41.2376	0.175248
0.51376	43.79	41.2726	0.174548
0.5138	38.86	41.3075	0.173849
0.51384	44.22	41.3425	0.173151
0.51388	38.66	41.3774	0.172453
0.51392	44.07	41.4123	0.171755
0.51396	38.42	41.4471	0.171057
0.514	43.59	41.482	0.17036
0.51404	38.38	41.5168	0.169663
0.51408	43.02	41.5517	0.168966
0.51412	38.47	41.5865	0.168269
0.51416	42.97	41.6214	0.167573
0.5142	39.09	41.6562	0.166876
0.51424	42.83	41.691	0.166179
0.51428	39.14	41.7259	0.165483
0.51432	42.92	41.7607	0.164786
0.51436	40.1	41.7955	0.164089
0.5144	43.26	41.8304	0.163392
0.51444	40.53	41.8652	0.162696
0.51448	44.12	41.9001	0.161999
0.51452	40.72	41.9349	0.161302
0.51456	43.79	41.9697	0.160605
0.5146	41.82	42.0046	0.159908
0.51464	43.26	42.0394	0.159212
0.51468	42.64	42.0743	0.158515
0.51472	42.01	42.1091	0.157818
0.51476	43.98	42.144	0.15712
0.5148	41.06	42.1788	0.156423
0.51484	44.7	42.2137	0.155726
0.51488	39.81	42.2486	0.155028
0.51492	44.5	42.2835	0.15433
0.51496	39.76	42.3184	0.153632
0.515	44.46	42.3533	0.152933
0.51504	38.66	42.3883	0.152234
0.51508	44.74	42.4233	0.151535
0.51512	38.81	42.4583	0.150835
0.51516	43.93	42.4933	0.150135
0.5152	39.43	42.5283	0.149434
0.51524	43.59	42.5634	0.148732
0.51528	39.72	42.5985	0.148031
0.51532	43.59	42.6336	0.147328
0.51536	39.96	42.6687	0.146625
0.5154	44.07	42.7039	0.145922
0.51544	40.44	42.7391	0.145218
0.51548	44.6	42.7743	0.144514
0.51552	41.82	42.8095	0.14381
0.51556	44.22	42.8448	0.143105
0.5156	41.97	42.88	0.142399
0.51564	44.79	42.9153	0.141694
0.51568	42.83	42.9506	0.140988
0.51572	44.22	42.9859	0.140282
0.51576	43.98	43.0212	0.139576
0.5158	43.31	43.0565	0.138869
0.51584	44.79	43.0919	0.138163
0.51588	41.97	43.1272	0.137456
0.51592	45.75	43.1626	0.136749
0.51596	41.49	43.1979	0.136041
0.516	46.18	43.2333	0.135334
0.51604	39.91	43.2687	0.134626
0.51608	45.6	43.3041	0.133917
0.51612	40.2	43.3396	0.133209
0.51616	45.51	43.375	0.1325
0.5162	40.2	43.4105	0.131791
0.51624	44.74	43.446	0.131081
0.51628	40.05	43.4815	0.130371
0.51632	44.98	43.517	0.12966
0.51636	40.15	43.5525	0.12895
0.5164	45.13	43.5881	0.128239
0.51644	40.91	43.6236	0.127527
0.51648	45.32	43.6592	0.126815
0.51652	41.44	43.6948	0.126104
0.51656	45.41	43.7304	0.125391
0.5166	42.06	43.766	0.124679
0.51664	46.66	43.8017	0.123967
0.51668	42.59	43.8373	0.123254
0.51672	45.7	43.8729	0.122542
0.51676	44.22	43.9085	0.121829
0.5168	45.32	43.9442	0.121117
0.51684	44.65	43.9798	0.120405
0.51688	44.36	44.0154	0.119692
0.51692	45.32	44.051	0.11898
0.51696	43.5	44.0866	0.118268
0.517	46.32	44.1222	0.117556
0.51704	42.92	44.1578	0.116844
0.51708	46.85	44.1934	0.116132
0.51712	41.58	44.229	0.11542
0.51716	47.04	44.2646	0.114708
0.5172	41.01	44.3002	0.113996
0.51724	46.94	44.3358	0.113284
0.51728	41.25	44.3714	0.112572
0.51732	45.6	44.407	0.11186
0.51736	41.58	44.4426	0.111148
0.5174	45.41	44.4782	0.110436
0.51744	41.44	44.5138	0.109724
0.51748	46.13	44.5494	0.109011
0.51752	42.45	44.585	0.108299
0.51756	45.51	44.6207	0.107587
0.5176	42.78	44.6563	0.106874
0.51764	47.04	44.6919	0.106162
0.51768	43.35	44.7275	0.10545
0.51772	46.37	44.7631	0.104738
0.51776	44.17	44.7987	0.104026
0.5178	46.75	44.8343	0.103315
0.51784	44.79	44.8699	0.102603
0.51788	46.9	44.9054	0.101892
0.51792	45.22	44.941	0.101181
0.51796	45.75	44.9765	0.10047
0.518	46.66	45.0121	0.099759
0.51804	44.7	45.0476	0.0990484
0.51808	46.99	45.0831	0.0983381
0.51812	44.22	45.1186	0.0976279
0.51816	48.05	45.1541	0.0969178
0.5182	42.88	45.1896	0.0962077
0.51824	47.38	45.2251	0.0954977
0.51828	42.25	45.2606	0.0947877
0.51832	46.99	45.2961	0.0940776
0.51836	42.73	45.3316	0.0933674
0.5184	47.33	45.3671	0.092657
0.51844	42.78	45.4027	0.0919465
0.51848	46.8	45.4382	0.0912358
0.51852	41.87	45.4738	0.0905249
0.51856	46.8	45.5093	0.0898137
0.5186	42.97	45.5449	0.0891023
0.51864	47.14	45.5805	0.0883906
0.51868	43.4	45.6161	0.0876787
0.51872	47.33	45.6517	0.0869666
0.51876	43.88	45.6873	0.0862542
0.5188	47.42	45.7229	0.0855416
0.51884	44.6	45.7586	0.0848288
0.51888	47.95	45.7942	0.0841158
0.51892	45.13	45.8299	0.0834026
0.51896	47.33	45.8655	0.0826893
0.519	46.51	45.9012	0.0819757
0.51904	46.61	45.9369	0.0812619
0.51908	47.09	45.9726	0.0805479
0.51912	45.89	46.0083	0.0798337
0.51916	47.42	46.044	0.0791192
0.5192	45.03	46.0798	0.0784044
0.51924	48	46.1155	0.0776893
0.51928	43.98	46.1513	0.0769738
0.51932	48.86	46.1871	0.076258
0.51936	42.83	46.2229	0.0755417
0.5194	48.76	46.2588	0.0748249
0.51944	42.92	46.2946	0.0741076
0.51948	48.14	46.3305	0.0733898
0.51952	43.21	46.3664	0.0726714
0.51956	47.71	46.4024	0.0719524
0.5196	43.45	46.4384	0.0712328
0.51964	48.38	46.4744	0.0705127
0.51968	43.88	46.5104	0.0697919
0.51972	48.05	46.5465	0.0690705
0.51976	44.36	46.5826	0.0683486
0.5198	47.81	46.6187	0.067626
0.51984	44.98	46.6549	0.0669029
0.51988	48.38	46.691	0.0661792
0.51992	45.84	46.7273	0.065455
0.51996	48.81	46.7635	0.0647302
0.52	45.65	46.7998	0.064005
0.52004	48.81	46.836	0.0632792
0.52008	46.42	46.8724	0.062553
0.52012	47.95	46.9087	0.0618262
0.52016	47.52	46.9451	0.061099
0.5202	46.94	46.9814	0.0603712
0.52024	48.96	47.0179	0.059643
0.52028	46.27	47.0543	0.0589141
0.52032	49.29	47.0908	0.0581847
0.52036	44.93	47.1273	0.0574548
0.5204	49.34	47.1638	0.0567242
0.52044	44.17	47.2004	0.0559929
0.52048	49.48	47.237	0.0552609
0.52052	43.79	47.2736	0.0545283
0.52056	48.96	47.3103	0.0537949
0.5206	43.98	47.347	0.0530607
0.52064	49.05	47.3837	0.0523258
0.52068	44.17	47.4205	0.0515902
0.52072	48.29	47.4573	0.0508537
0.52076	44.5	47.4942	0.0501166
0.5208	48.62	47.5311	0.0493787
0.52084	44.89	47.568	0.0486401
0.52088	49	47.605	0.0479008
0.52092	45.65	47.642	0.047161
0.52096	49.34	47.679	0.0464205
0.521	46.18	47.716	0.0456796
0.52104	49.82	47.7531	0.0449381
0.52108	46.85	47.7902	0.0441962
0.52112	49.58	47.8273	0.043454
0.52116	47.42	47.8644	0.0427113
0.5212	49.29	47.9016	0.0419684
0.52124	48.86	47.9387	0.0412252
0.52128	48.05	47.9759	0.0404817
0.52132	49.77	48.0131	0.039738
0.52136	46.99	48.0503	0.0389941
0.5214	50.34	48.0875	0.0382499
0.52144	45.89	48.1247	0.0375056
0.52148	50.73	48.162	0.036761
0.52152	45.65	48.1992	0.0360162
0.52156	50.3	48.2364	0.0352711
0.5216	44.89	48.2737	0.0345259
0.52164	50.34	48.311	0.0337805
0.52168	44.84	48.3483	0.0330348
0.52172	49.96	48.3856	0.032289
0.52176	45.08	48.4229	0.031543
0.5218	49.77	48.4602	0.0307969
0.52184	46.08	48.4975	0.0300507
0.52188	49.67	48.5348	0.0293044
0.52192	46.27	48.5721	0.0285581
0.52196	50.58	48.6094	0.0278119
0.522	46.75	48.6467	0.0270658
0.52204	50.39	48.684	0.0263198
0.52208	46.99	48.7213	0.0255741
0.52212	50.82	48.7586	0.0248286
0.52216	47.95	48.7958	0.0240834
0.5222	50.68	48.8331	0.0233387
0.52224	48.72	48.8703	0.0225944
0.52228	50.58	48.9075	0.0218505
0.52232	49.48	48.9446	0.0211072
0.52236	49.43	48.9818	0.0203644
0.5224	50.97	49.0189	0.0196222
0.52244	47.95	49.056	0.0188805
0.52248	51.73	49.093	0.0181395
0.52252	47.18	49.13	0.017399
0.52256	51.83	49.167	0.0166592
0.5226	46.47	49.204	0.0159199
0.52264	51.73	49.2409	0.0151813
0.52268	45.89	49.2778	0.0144432
0.52272	51.3	49.3147	0.0137058
0.52276	45.84	49.3516	0.0129689
0.5228	51.11	49.3884	0.0122327
0.52284	46.8	49.4251	0.0114971
0.52288	51.06	49.4619	0.0107621
0.52292	46.94	49.4986	0.0100278
0.52296	50.73	49.5353	0.00929425
0.523	47.23	49.5719	0.00856142
0.52304	51.4	49.6085	0.00782938
0.52308	47.62	49.6451	0.00709816
0.52312	51.35	49.6816	0.00636782
0.52316	48.14	49.7181	0.0056384
0.5232	51.78	49.7545	0.00490994
0.52324	48.38	49.7909	0.00418249
0.52328	52.59	49.8272	0.0034561
0.52332	49.77	49.8635	0.00273079
0.52336	51.54	49.8997	0.00200661
0.5234	50.44	49.9358	0.00128358
0.52344	50.63	49.9719	0.000561716
0.52348	51.49	50.0079	-0.000158978
0.52352	49.96	50.0439	-0.000878496
0.52356	52.02	50.0798	-0.00159684
0.5236	48.81	50.1157	-0.00231403
0.52364	52.55	50.1515	-0.00303006
0.52368	47.52	50.1872	-0.00374497
0.52372	52.64	50.2229	-0.00445878
0.52376	47.52	50.2586	-0.00517149
0.5238	52.55	50.2942	-0.00588314
0.52384	46.99	50.3297	-0.00659373
0.52388	52.11	50.3652	-0.00730328
0.52392	47.71	50.4006	-0.0080118
0.52396	51.3	50.436	-0.00871929
0.524	47.66	50.4713	-0.00942575
0.52404	51.64	50.5066	-0.0101312
0.52408	47.9	50.5418	-0.0108355
0.52412	52.11	50.5769	-0.0115388
0.52416	48.57	50.612	-0.012241
0.5242	52.02	50.6471	-0.012942
0.52424	48.86	50.6821	-0.0136419
0.52428	53.17	50.717	-0.0143405
0.52432	49.29	50.7519	-0.0150379
0.52436	52.74	50.7867	-0.0157341
0.5244	50.25	50.8214	-0.0164289
0.52444	52.64	50.8561	-0.0171223
0.52448	51.01	50.8907	-0.0178145
0.52452	51.73	50.9253	-0.0185052
0.52456	52.21	50.9597	-0.0191946
0.5246	51.35	50.9941	-0.0198826
0.52464	53.17	51.0285	-0.0205692
0.52468	49.05	51.0627	-0.0212545
0.52472	53.69	51.0969	-0.0219384
0.52476	48.52	51.131	-0.0226209
0.5248	53.65	51.1651	-0.0233022
0.52484	48.72	51.1991	-0.0239821
0.52488	53.45	51.233	-0.0246608
0.52492	48.33	51.2669	-0.0253383
0.52496	53.02	51.3007	-0.0260145
0.525	48.38	51.3345	-0.0266894
0.52504	53.36	51.3682	-0.0273632
0.52508	48.67	51.4018	-0.0280357
0.52512	52.45	51.4354	-0.028707
0.52516	48.96	51.4689	-0.0293771
0.5252	53.12	51.5023	-0.030046
0.52524	49.39	51.5357	-0.0307137
0.52528	53.17	51.569	-0.03138
0.52532	49.67	51.6023	-0.0320451
0.52536	53.65	51.6354	-0.0327089
0.5254	49.82	51.6686	-0.0333713
0.52544	53.74	51.7016	-0.0340324
0.52548	51.16	51.7346	-0.0346922
0.52552	54.22	51.7675	-0.0353505
0.52556	51.49	51.8004	-0.0360074
0.5256	53.31	51.8331	-0.0366629
0.52564	52.45	51.8659	-0.0373171
0.52568	52.26	51.8985	-0.0379698
0.52572	53.69	51.9311	-0.0386211
0.52576	51.16	51.9636	-0.0392711
0.5258	54.6	51.996	-0.0399198
0.52584	49.96	52.0284	-0.0405671
0.52588	54.84	52.0607	-0.0412132
0.52592	49.96	52.0929	-0.0418581
0.52596	54.84	52.1251	-0.0425018
0.526	49.05	52.1572	-0.0431443
0.52604	53.93	52.1893	-0.0437858
0.52608	49.15	52.2213	-0.0444262
0.52612	53.55	52.2533	-0.0450656
0.52616	49.29	52.2852	-0.045704
0.5262	53.6	52.3171	-0.0463414
0.52624	49.58	52.3489	-0.0469779
0.52628	53.65	52.3807	-0.0476135
0.52632	49.82	52.4124	-0.0482482
0.52636	53.69	52.4441	-0.0488819
0.5264	50.2	52.4757	-0.0495146
0.52644	54.17	52.5073	-0.0501465
0.52648	50.63	52.5389	-0.0507773
0.52652	54.51	52.5704	-0.0514072
0.52656	52.07	52.6018	-0.0520361
0.5266	54.56	52.6332	-0.052664
0.52664	52.5	52.6645	-0.0532908
0.52668	54.17	52.6958	-0.0539166
0.52672	53.84	52.7271	-0.0545415
0.52676	52.83	52.7583	-0.0551653
0.5268	54.46	52.7894	-0.0557881
0.52684	52.31	52.8205	-0.0564099
0.52688	55.03	52.8515	-0.0570309
0.52692	51.35	52.8825	-0.0576509
0.52696	55.23	52.9135	-0.0582701
0.527	50.3	52.9444	-0.0588884
0.52704	55.75	52.9753	-0.059506
0.52708	49.63	53.0061	-0.0601229
0.52712	55.08	53.037	-0.0607391
0.52716	49.82	53.0677	-0.0613547
0.5272	54.6	53.0985	-0.0619696
0.52724	49.96	53.1292	-0.062584
0.52728	54.56	53.1599	-0.0631978
0.52732	50.34	53.1906	-0.063811
0.52736	54.56	53.2212	-0.0644237
0.5274	51.11	53.2518	-0.0650359
0.52744	54.46	53.2824	-0.0656476
0.52748	51.25	53.3129	-0.0662587
0.52752	54.84	53.3435	-0.0668693
0.52756	51.73	53.374	-0.0674793
0.5276	55.56	53.4044	-0.0680887
0.52764	52.35	53.4349	-0.0686975
0.52768	55.51	53.4653	-0.0693058
0.52772	53.02	53.4957	-0.0699134
0.52776	55.47	53.526	-0.0705205
0.5278	54.36	53.5563	-0.0711269
0.52784	53.89	53.5866	-0.0717327
0.52788	54.94	53.6169	-0.072338
0.52792	53.02	53.6471	-0.0729428
0.52796	55.85	53.6774	-0.073547
0.528	52.07	53.7075	-0.0741508
0.52804	56.18	53.7377	-0.0747541
0.52808	51.44	53.7679	-0.075357
0.52812	55.9	53.798	-0.0759596
0.52816	50.49	53.8281	-0.0765619
0.5282	56.28	53.8582	-0.077164
0.52824	50.34	53.8883	-0.0777658
0.52828	55.8	53.9184	-0.0783674
0.52832	50.87	53.9484	-0.0789688
0.52836	55.47	53.9785	-0.0795701
0.5284	51.16	54.0086	-0.0801713
0.52844	55.37	54.0386	-0.0807723
0.52848	51.54	54.0687	-0.0813733
0.52852	54.65	54.0987	-0.0819741
0.52856	52.16	54.1287	-0.0825748
0.5286	55.42	54.1588	-0.0831753
0.52864	52.59	54.1888	-0.0837757
0.52868	55.9	54.2188	-0.0843759
0.52872	53.26	54.2488	-0.084976
0.52876	56.47	54.2788	-0.0855758
0.5288	53.69	54.3088	-0.0861754
0.52884	56.18	54.3387	-0.0867747
0.52888	54.51	54.3687	-0.0873738
0.52892	55.42	54.3986	-0.0879726
0.52896	55.32	54.4286	-0.0885712
0.529	54.32	54.4585	-0.0891696
0.52904	56.76	54.4884	-0.0897678
0.52908	52.98	54.5183	-0.0903658
0.52912	57.48	54.5482	-0.0909636
0.52916	51.78	54.5781	-0.0915614
0.5292	57.57	54.608	-0.092159
0.52924	51.59	54.6378	-0.0927566
0.52928	56.61	54.6677	-0.0933543
0.52932	51.3	54.6976	-0.0939519
0.52936	56.52	54.7275	-0.0945496
0.5294	51.59	54.7574	-0.0951474
0.52944	56.23	54.7873	-0.0957453
0.52948	51.97	54.8172	-0.0963434
0.52952	55.51	54.8471	-0.0969415
0.52956	52.21	54.877	-0.0975398
0.5296	56.61	54.9069	-0.0981382
0.52964	52.69	54.9368	-0.0987368
0.52968	56.52	54.9668	-0.0993354
0.52972	52.69	54.9967	-0.099934
0.52976	56.9	55.0266	-0.100533
0.5298	53.74	55.0566	-0.101131
0.52984	57.24	55.0865	-0.10173
0.52988	54.27	55.1164	-0.102329
0.52992	57.19	55.1464	-0.102928
0.52996	55.18	55.1763	-0.103526
0.53	56.33	55.2062	-0.104125
0.53004	56.18	55.2362	-0.104723
0.53008	55.18	55.2661	-0.105321
0.53012	57	55.296	-0.10592
0.53016	53.69	55.3259	-0.106518
0.5302	57.86	55.3558	-0.107116
0.53024	53.26	55.3857	-0.107715
0.53028	57.81	55.4157	-0.108313
0.53032	52.21	55.4456	-0.108911
0.53036	57.76	55.4755	-0.10951
0.5304	52.55	55.5054	-0.110108
0.53044	57.67	55.5354	-0.110707
0.53048	52.07	55.5653	-0.111306
0.53052	57.14	55.5952	-0.111905
0.53056	52.4	55.6252	-0.112504
0.5306	56.81	55.6552	-0.113103
0.53064	53.07	55.6851	-0.113703
0.53068	57.28	55.7151	-0.114302
0.53072	53.41	55.7451	-0.114902
0.53076	57.33	55.7751	-0.115501
0.5308	53.84	55.805	-0.116101
0.53084	57.28	55.835	-0.116701
0.53088	54.41	55.865	-0.1173
0.53092	58.1	55.895	-0.1179
0.53096	54.84	55.925	-0.118499
0.531	57.81	55.9549	-0.119098
0.53104	55.8	55.9849	-0.119698
0.53108	57.24	56.0148	-0.120297
0.53112	57.09	56.0448	-0.120895
0.53116	56.33	56.0747	-0.121494
0.5312	58.05	56.1046	-0.122092
0.53124	54.6	56.1345	-0.12269
0.53128	58.62	56.1644	-0.123288
0.53132	54.08	56.1943	-0.123886
0.53136	59.1	56.2242	-0.124484
0.5314	53.22	56.2541	-0.125081
0.53144	58.39	56.2839	-0.125678
0.53148	53.22	56.3138	-0.126275
0.53152	58.05	56.3436	-0.126873
0.53156	53.36	56.3735	-0.12747
0.5316	57.95	56.4033	-0.128066
0.53164	53.26	56.4332	-0.128663
0.53168	57.52	56.463	-0.12926
0.53172	54.27	56.4928	-0.129856
0.53176	57.67	56.5226	-0.130453
0.5318	54.41	56.5524	-0.131049
0.53184	58.05	56.5822	-0.131645
0.53188	54.51	56.612	-0.13224
0.53192	58.48	56.6418	-0.132836
0.53196	55.27	56.6715	-0.133431
0.532	59.1	56.7013	-0.134026
0.53204	55.66	56.731	-0.13462
0.53208	57.91	56.7607	-0.135214
0.53212	56.85	56.7904	-0.135807
0.53216	58.48	56.82	-0.1364
0.5322	57.95	56.8496	-0.136992
0.53224	57.62	56.8792	-0.137584
0.53228	58.19	56.9088	-0.138176
0.53232	56.18	56.9383	-0.138766
0.53236	60.06	56.9678	-0.139357
0.5324	55.08	56.9973	-0.139947
0.53244	60.25	57.0268	-0.140536
0.53248	54.22	57.0562	-0.141125
0.53252	58.91	57.0857	-0.141713
0.53256	53.74	57.1151	-0.142301
0.5326	59.25	57.1444	-0.142889
0.53264	53.5	57.1738	-0.143476
0.53268	58.67	57.2032	-0.144063
0.53272	54.22	57.2325	-0.14465
0.53276	58.82	57.2618	-0.145236
0.5328	55.37	57.2911	-0.145822
0.53284	58.39	57.3204	-0.146408
0.53288	54.7	57.3496	-0.146993
0.53292	58.72	57.3789	-0.147578
0.53296	55.13	57.4081	-0.148162
0.533	58.96	57.4373	-0.148746
0.53304	55.27	57.4665	-0.149329
0.53308	59.96	57.4956	-0.149912
0.53312	56.52	57.5247	-0.150495
0.53316	60.35	57.5538	-0.151077
0.5332	57.19	57.5829	-0.151658
0.53324	59.39	57.6119	-0.152239
0.53328	58.29	57.6409	-0.152819
0.53332	58.62	57.6699	-0.153398
0.53336	59.2	57.6988	-0.153977
0.5334	56.71	57.7277	-0.154555
0.53344	60.49	57.7566	-0.155132
0.53348	55.47	57.7855	-0.155709
0.53352	59.77	57.8143	-0.156285
0.53356	55.47	57.8431	-0.156861
0.5336	60.01	57.8718	-0.157437
0.53364	54.36	57.9006	-0.158011
0.53368	59.39	57.9293	-0.158586
0.53372	54.7	57.958	-0.15916
0.53376	60.68	57.9867	-0.159733
0.5338	54.8	58.0153	-0.160306
0.53384	59.68	58.044	-0.160879
0.53388	55.37	58.0726	-0.161451
0.53392	59.92	58.1012	-0.162023
0.53396	55.03	58.1297	-0.162594
0.534	59.29	58.1583	-0.163165
0.53404	57.04	58.1868	-0.163735
0.53408	59.44	58.2153	-0.164305
0.53412	56.85	58.2437	-0.164875
0.53416	60.4	58.2722	-0.165443
0.5342	57.24	58.3006	-0.166011
0.53424	61.21	58.3289	-0.166579
0.53428	58	58.3573	-0.167145
0.53432	59.49	58.3856	-0.167711
0.53436	58.19	58.4138	-0.168277
0.5344	58.91	58.4421	-0.168842
0.53444	59.68	58.4703	-0.169406
0.53448	57.86	58.4985	-0.169969
0.53452	60.54	58.5266	-0.170532
0.53456	57.19	58.5547	-0.171094
0.5346	61.21	58.5828	-0.171655
0.53464	54.99	58.6108	-0.172216
0.53468	61.31	58.6388	-0.172777
0.53472	55.08	58.6668	-0.173337
0.53476	61.16	58.6948	-0.173896
0.5348	54.89	58.7227	-0.174455
0.53484	60.44	58.7506	-0.175013
0.53488	55.37	58.7785	-0.17557
0.53492	60.87	58.8064	-0.176128
0.53496	55.9	58.8342	-0.176684
0.535	59.73	58.862	-0.17724
0.53504	56.57	58.8898	-0.177796
0.53508	59.82	58.9175	-0.178351
0.53512	56.76	58.9452	-0.178905
0.53516	60.78	58.9729	-0.179458
0.5352	57.86	59.0006	-0.180011
0.53524	60.97	59.0281	-0.180563
0.53528	57.72	59.0557	-0.181114
0.53532	60.78	59.0832	-0.181664
0.53536	58.29	59.1107	-0.182214
0.5354	61.02	59.1381	-0.182762
0.53544	59.53	59.1655	-0.183309
0.53548	60.16	59.1928	-0.183856
0.53552	61.4	59.2201	-0.184401
0.53556	58.72	59.2473	-0.184946
0.5356	61.45	59.2744	-0.185489
0.53564	58.15	59.3016	-0.186031
0.53568	61.54	59.3286	-0.186573
0.53572	57.33	59.3556	-0.187113
0.53576	61.35	59.3826	-0.187652
0.5358	56.04	59.4095	-0.18819
0.53584	61.78	59.4364	-0.188728
0.53588	56.18	59.4632	-0.189264
0.53592	62.02	59.49	-0.1898
0.53596	56.09	59.5167	-0.190335
0.536	61.54	59.5434	-0.190868
0.53604	56.61	59.5701	-0.191401
0.53608	60.63	59.5966	-0.191933
0.53612	56.52	59.6232	-0.192464
0.53616	60.97	59.6497	-0.192994
0.5362	58.1	59.6761	-0.193523
0.53624	61.4	59.7025	-0.19405
0.53628	58.77	59.7289	-0.194577
0.53632	62.36	59.7552	-0.195103
0.53636	58.1	59.7814	-0.195628
0.5364	62.02	59.8076	-0.196151
0.53644	59.29	59.8337	-0.196673
0.53648	61.74	59.8597	-0.197194
0.53652	60.2	59.8857	-0.197714
0.53656	60.49	59.9116	-0.198233
0.5366	60.97	59.9375	-0.19875
0.53664	59.53	59.9633	-0.199267
0.53668	61.98	59.9891	-0.199782
0.53672	59.44	60.0148	-0.200296
0.53676	63.22	60.0404	-0.200809
0.5368	58	60.066	-0.20132
0.53684	63.12	60.0915	-0.201831
0.53688	56.9	60.117	-0.20234
0.53692	61.93	60.1425	-0.202849
0.53696	56.81	60.1678	-0.203357
0.537	61.83	60.1932	-0.203864
0.53704	56.85	60.2185	-0.204369
0.53708	61.54	60.2437	-0.204874
0.53712	57.14	60.2689	-0.205379
0.53716	61.31	60.2941	-0.205882
0.5372	56.95	60.3192	-0.206384
0.53724	61.69	60.3443	-0.206886
0.53728	58.43	60.3693	-0.207387
0.53732	61.83	60.3943	-0.207887
0.53736	58.39	60.4193	-0.208386
0.5374	62.79	60.4442	-0.208884
0.53744	59.15	60.469	-0.209381
0.53748	62.6	60.4938	-0.209877
0.53752	59.73	60.5186	-0.210372
0.53756	62.69	60.5433	-0.210866
0.5376	60.25	60.5679	-0.211358
0.53764	62.31	60.5925	-0.21185
0.53768	61.5	60.617	-0.212341
0.53772	60.63	60.6415	-0.21283
0.53776	62.36	60.666	-0.213319
0.5378	60.01	60.6903	-0.213807
0.53784	62.88	60.7147	-0.214293
0.53788	58.53	60.7389	-0.214779
0.53792	63.99	60.7632	-0.215263
0.53796	57.95	60.7873	-0.215747
0.538	63.79	60.8115	-0.21623
0.53804	57.95	60.8356	-0.216712
0.53808	62.26	60.8596	-0.217193
0.53812	58.58	60.8836	-0.217673
0.53816	63.08	60.9076	-0.218153
0.5382	58.24	60.9316	-0.218631
0.53824	62.36	60.9555	-0.21911
0.53828	58	60.9794	-0.219587
0.53832	61.83	61.0032	-0.220064
0.53836	58.67	61.027	-0.22054
0.5384	62.65	61.0508	-0.221016
0.53844	59.53	61.0745	-0.221491
0.53848	63.12	61.0983	-0.221965
0.53852	58.91	61.1219	-0.222439
0.53856	63.55	61.1456	-0.222912
0.5386	60.25	61.1692	-0.223384
0.53864	63.46	61.1928	-0.223856
0.53868	60.54	61.2164	-0.224327
0.53872	63.08	61.2399	-0.224798
0.53876	61.54	61.2634	-0.225267
0.5388	61.31	61.2868	-0.225737
0.53884	63.41	61.3103	-0.226206
0.53888	60.97	61.3337	-0.226674
0.53892	63.55	61.3571	-0.227142
0.53896	59.49	61.3804	-0.227609
0.539	63.75	61.4038	-0.228076
0.53904	59.44	61.4271	-0.228543
0.53908	63.27	61.4505	-0.229009
0.53912	59.01	61.4738	-0.229475
0.53916	63.7	61.4971	-0.229941
0.5392	58.48	61.5204	-0.230407
0.53924	63.22	61.5437	-0.230873
0.53928	57.95	61.567	-0.231339
0.53932	63.17	61.5903	-0.231805
0.53936	57.81	61.6136	-0.232271
0.5394	62.93	61.6369	-0.232738
0.53944	59.34	61.6602	-0.233204
0.53948	63.12	61.6835	-0.23367
0.53952	59.44	61.7069	-0.234137
0.53956	63.12	61.7302	-0.234604
0.5396	59.82	61.7535	-0.235071
0.53964	63.6	61.7769	-0.235538
0.53968	60.97	61.8002	-0.236005
0.53972	63.51	61.8236	-0.236472
0.53976	61.11	61.847	-0.236939
0.5398	63.7	61.8703	-0.237407
0.53984	62.12	61.8937	-0.237874
0.53988	63.17	61.9171	-0.238342
0.53992	63.03	61.9405	-0.23881
0.53996	62.98	61.9639	-0.239278
0.54	63.79	61.9873	-0.239746
0.54004	61.11	62.0107	-0.240215
0.54008	64.03	62.0342	-0.240683
0.54012	59.73	62.0576	-0.241153
0.54016	65.23	62.0811	-0.241622
0.5402	58.43	62.1046	-0.242092
0.54024	63.99	62.1281	-0.242563
0.54028	58.82	62.1517	-0.243034
0.54032	63.84	62.1753	-0.243506
0.54036	58.34	62.1989	-0.243979
0.5404	63.36	62.2226	-0.244452
0.54044	59.44	62.2463	-0.244926
0.54048	63.41	62.27	-0.245401
0.54052	59.53	62.2938	-0.245876
0.54056	63.55	62.3176	-0.246353
0.5406	59.68	62.3415	-0.24683
0.54064	63.75	62.3654	-0.247308
0.54068	60.63	62.3893	-0.247786
0.54072	63.89	62.4133	-0.248266
0.54076	60.54	62.4373	-0.248746
0.5408	64.7	62.4613	-0.249227
0.54084	61.21	62.4854	-0.249708
0.54088	64.18	62.5095	-0.25019
0.54092	62.41	62.5336	-0.250673
0.54096	63.6	62.5578	-0.251156
0.541	63.32	62.582	-0.25164
0.54104	62.17	62.6062	-0.252125
0.54108	64.46	62.6305	-0.25261
0.54112	61.4	62.6548	-0.253096
0.54116	65.28	62.6791	-0.253583
0.5412	60.4	62.7035	-0.25407
0.54124	64.8	62.7279	-0.254558
0.54128	60.11	62.7523	-0.255046
0.54132	64.75	62.7768	-0.255535
0.54136	59.68	62.8013	-0.256025
0.5414	64.85	62.8258	-0.256516
0.54144	59.25	62.8504	-0.257007
0.54148	64.18	62.875	-0.257499
0.54152	59.82	62.8996	-0.257992
0.54156	64.23	62.9243	-0.258485
0.5416	59.82	62.949	-0.25898
0.54164	63.6	62.9737	-0.259474
0.54168	60.4	62.9985	-0.25997
0.54172	64.51	63.0233	-0.260466
0.54176	61.07	63.0481	-0.260962
0.5418	64.94	63.0729	-0.261459
0.54184	61.21	63.0978	-0.261956
0.54188	65.18	63.1227	-0.262454
0.54192	62.5	63.1476	-0.262952
0.54196	64.66	63.1725	-0.26345
0.542	62.98	63.1974	-0.263948
0.54204	64.85	63.2223	-0.264446
0.54208	63.79	63.2472	-0.264945
0.54212	63.99	63.2722	-0.265443
0.54216	65.13	63.2971	-0.265942
0.5422	62.55	63.322	-0.26644
0.54224	66.38	63.3469	-0.266938
0.54228	62.17	63.3718	-0.267437
0.54232	65.66	63.3968	-0.267935
0.54236	60.87	63.4217	-0.268433
0.5424	66.57	63.4466	-0.268932
0.54244	60.73	63.4715	-0.26943
0.54248	65.37	63.4964	-0.269928
0.54252	60.25	63.5213	-0.270427
0.54256	64.85	63.5463	-0.270925
0.5426	60.73	63.5712	-0.271423
0.54264	64.94	63.5961	-0.271922
0.54268	61.54	63.621	-0.27242
0.54272	65.28	63.6459	-0.272919
0.54276	61.16	63.6708	-0.273417
0.5428	65.47	63.6958	-0.273915
0.54284	61.11	63.7207	-0.274413
0.54288	65.57	63.7456	-0.274911
0.54292	61.93	63.7705	-0.275409
0.54296	65.33	63.7953	-0.275907
0.543	62.6	63.8202	-0.276404
0.54304	65.9	63.8451	-0.276901
0.54308	63.22	63.8699	-0.277398
0.54312	66.04	63.8947	-0.277895
0.54316	63.94	63.9196	-0.278391
0.5432	64.56	63.9444	-0.278887
0.54324	65.61	63.9691	-0.279383
0.54328	64.32	63.9939	-0.279878
0.54332	65.61	64.0186	-0.280373
0.54336	62.6	64.0433	-0.280867
0.5434	67.05	64.0681	-0.281361
0.54344	61.98	64.0927	-0.281855
0.54348	66.81	64.1174	-0.282348
0.54352	61.64	64.1421	-0.282841
0.54356	67.14	64.1667	-0.283334
0.5436	61.83	64.1914	-0.283827
0.54364	65.85	64.216	-0.28432
0.54368	61.26	64.2406	-0.284812
0.54372	65.66	64.2652	-0.285304
0.54376	61.02	64.2898	-0.285796
0.5438	65.61	64.3144	-0.286288
0.54384	61.02	64.339	-0.28678
0.54388	65.52	64.3636	-0.287272
0.54392	62.55	64.3882	-0.287764
0.54396	65.28	64.4128	-0.288256
0.544	63.12	64.4374	-0.288747
0.54404	66	64.4619	-0.289239
0.54408	63.55	64.4865	-0.28973
0.54412	67.05	64.5111	-0.290221
0.54416	63.27	64.5356	-0.290712
0.5442	65.47	64.5601	-0.291203
0.54424	64.42	64.5847	-0.291693
0.54428	66	64.6092	-0.292183
0.54432	65.76	64.6337	-0.292673
0.54436	64.46	64.6582	-0.293163
0.5444	66.76	64.6826	-0.293653
0.54444	63.65	64.7071	-0.294142
0.54448	67.05	64.7316	-0.294631
0.54452	63.12	64.756	-0.29512
0.54456	66.95	64.7804	-0.295609
0.5446	62.55	64.8049	-0.296098
0.54464	67.1	64.8293	-0.296587
0.54468	61.5	64.8538	-0.297075
0.54472	67	64.8782	-0.297564
0.54476	62.17	64.9026	-0.298053
0.5448	65.95	64.9271	-0.298542
0.54484	61.21	64.9515	-0.299031
0.54488	66.76	64.976	-0.29952
0.54492	62.41	65.0004	-0.300009
0.54496	65.71	65.0249	-0.300498
0.545	63.08	65.0494	-0.300987
0.54504	66.57	65.0738	-0.301476
0.54508	63.08	65.0983	-0.301966
0.54512	67.24	65.1228	-0.302455
0.54516	63.46	65.1472	-0.302944
0.5452	67.62	65.1717	-0.303434
0.54524	64.8	65.1961	-0.303923
0.54528	67.48	65.2206	-0.304412
0.54532	64.94	65.2451	-0.304901
0.54536	66.38	65.2695	-0.30539
0.5454	65.71	65.294	-0.305879
0.54544	65.57	65.3184	-0.306368
0.54548	66.19	65.3429	-0.306857
0.54552	64.23	65.3673	-0.307346
0.54556	67.24	65.3918	-0.307835
0.5456	64.13	65.4162	-0.308324
0.54564	67.82	65.4406	-0.308813
0.54568	63.75	65.4651	-0.309302
0.54572	67.62	65.4896	-0.309791
0.54576	61.98	65.514	-0.31028
0.5458	67.91	65.5385	-0.31077
0.54584	61.4	65.563	-0.31126
0.54588	67.05	65.5875	-0.311749
0.54592	62.65	65.612	-0.312239
0.54596	67.1	65.6365	-0.31273
0.546	62.69	65.661	-0.31322
0.54604	66.43	65.6856	-0.313711
0.54608	62.74	65.7101	-0.314202
0.54612	67.48	65.7347	-0.314693
0.54616	64.51	65.7592	-0.315184
0.5462	67.24	65.7838	-0.315676
0.54624	64.32	65.8084	-0.316167
0.54628	68.01	65.8329	-0.316659
0.54632	65.52	65.8575	-0.31715
0.54636	68.1	65.8821	-0.317642
0.5464	65.57	65.9067	-0.318133
0.54644	67.67	65.9312	-0.318625
0.54648	66.43	65.9558	-0.319116
0.54652	66.67	65.9804	-0.319607
0.54656	67.19	66.0049	-0.320099
0.5466	65.42	66.0295	-0.32059
0.54664	68.15	66.0541	-0.321081
0.54668	64.8	66.0786	-0.321572
0.54672	69.2	66.1032	-0.322064
0.54676	63.22	66.1278	-0.322555
0.5468	68.53	66.1523	-0.323047
0.54684	63.36	66.1769	-0.323538
0.54688	68.25	66.2015	-0.32403
0.54692	63.32	66.2261	-0.324522
0.54696	67.58	66.2507	-0.325015
0.547	63.51	66.2754	-0.325507
0.54704	68.1	66.3	-0.326
0.54708	62.69	66.3247	-0.326493
0.54712	67.1	66.3493	-0.326987
0.54716	63.79	66.374	-0.327481
0.5472	67.58	66.3987	-0.327975
0.54724	65.13	66.4235	-0.328469
0.54728	67.96	66.4482	-0.328964
0.54732	64.9	66.473	-0.329459
0.54736	68.34	66.4977	-0.329954
0.5474	64.75	66.5225	-0.33045
0.54744	67.58	66.5473	-0.330946
0.54748	65.47	66.5721	-0.331441
0.54752	68.1	66.5969	-0.331937
0.54756	66.86	66.6217	-0.332433
0.5476	67.72	66.6465	-0.33293
0.54764	67.29	66.6713	-0.333426
0.54768	66.95	66.6961	-0.333922
0.54772	69.16	66.7209	-0.334419
0.54776	65.8	66.7458	-0.334916
0.5478	68.87	66.7706	-0.335412
0.54784	65.09	66.7955	-0.335909
0.54788	68.82	66.8203	-0.336406
0.54792	63.84	66.8452	-0.336904
0.54796	68.2	66.8701	-0.337401
0.548	63.36	66.8949	-0.337899
0.54804	68.53	66.9198	-0.338397
0.54808	63.41	66.9448	-0.338895
0.54812	68.72	66.9697	-0.339394
0.54816	64.32	66.9946	-0.339892
0.5482	68.63	67.0196	-0.340391
0.54824	64.32	67.0445	-0.340891
0.54828	67.91	67.0695	-0.34139
0.54832	64.8	67.0945	-0.341889
0.54836	68.53	67.1194	-0.342389
0.5484	65.42	67.1444	-0.342889
0.54844	68.53	67.1694	-0.343388
0.54848	64.66	67.1944	-0.343888
0.54852	68.96	67.2194	-0.344387
0.54856	67.14	67.2443	-0.344887
0.5486	68.68	67.2693	-0.345386
0.54864	67.29	67.2942	-0.345885
0.54868	68.96	67.3192	-0.346383
0.54872	68.92	67.3441	-0.346882
0.54876	67.86	67.369	-0.34738
0.5488	69.01	67.3939	-0.347877
0.54884	67.05	67.4187	-0.348375
0.54888	69.35	67.4436	-0.348872
0.54892	65.61	67.4684	-0.349368
0.54896	70.88	67.4932	-0.349865
0.549	65.09	67.518	-0.35036
0.54904	70.64	67.5428	-0.350856
0.54908	64.7	67.5676	-0.351351
0.54912	70.16	67.5923	-0.351846
0.54916	63.94	67.6171	-0.352341
0.5492	69.59	67.6418	-0.352836
0.54924	64.7	67.6665	-0.35333
0.54928	68.63	67.6912	-0.353824
0.54932	64.99	67.7159	-0.354318
0.54936	69.44	67.7406	-0.354811
0.5494	64.75	67.7652	-0.355305
0.54944	69.2	67.7899	-0.355798
0.54948	66.04	67.8145	-0.356291
0.54952	69.54	67.8392	-0.356783
0.54956	66	67.8638	-0.357276
0.5496	69.92	67.8884	-0.357768
0.54964	67.29	67.913	-0.358259
0.54968	70.02	67.9375	-0.35875
0.54972	66.81	67.962	-0.359241
0.54976	69.39	67.9866	-0.359731
0.5498	68.49	68.011	-0.360221
0.54984	68.92	68.0355	-0.36071
0.54988	68.92	68.06	-0.361199
0.54992	67.77	68.0844	-0.361688
0.54996	70.35	68.1088	-0.362176
0.55	65.9	68.1332	-0.362663
0.55004	70.88	68.1575	-0.36315
0.55008	65.8	68.1819	-0.363637
0.55012	70.4	68.2062	-0.364123
0.55016	64.85	68.2305	-0.364609
0.5502	70.02	68.2548	-0.365095
0.55024	64.42	68.279	-0.365581
0.55028	69.87	68.3033	-0.366066
0.55032	65.28	68.3275	-0.36655
0.55036	69.39	68.3517	-0.367035
0.5504	65.8	68.3759	-0.367519
0.55044	69.83	68.4001	-0.368003
0.55048	65.8	68.4243	-0.368486
0.55052	69.54	68.4484	-0.368969
0.55056	66.81	68.4726	-0.369451
0.5506	69.97	68.4967	-0.369933
0.55064	66.47	68.5207	-0.370415
0.55068	70.4	68.5448	-0.370895
0.55072	67.62	68.5688	-0.371375
0.55076	70.59	68.5927	-0.371855
0.5508	68.05	68.6167	-0.372333
0.55084	69.83	68.6406	-0.372811
0.55088	69.73	68.6644	-0.373288
0.55092	69.83	68.6882	-0.373764
0.55096	70.11	68.712	-0.374239
0.551	68.82	68.7357	-0.374714
0.55104	71.31	68.7594	-0.375187
0.55108	67.53	68.783	-0.37566
0.55112	71.21	68.8066	-0.376132
0.55116	66.76	68.8301	-0.376603
0.5512	71.55	68.8536	-0.377073
0.55124	66.09	68.8771	-0.377542
0.55128	71.5	68.9005	-0.37801
0.55132	65.8	68.9239	-0.378478
0.55136	70.78	68.9473	-0.378945
0.5514	65.13	68.9706	-0.379411
0.55144	70.16	68.9938	-0.379877
0.55148	66.38	69.0171	-0.380342
0.55152	70.16	69.0403	-0.380806
0.55156	66.28	69.0635	-0.381269
0.5516	70.16	69.0866	-0.381732
0.55164	67.1	69.1097	-0.382194
0.55168	70.97	69.1327	-0.382655
0.55172	67.24	69.1557	-0.383115
0.55176	70.97	69.1787	-0.383574
0.5518	67.1	69.2016	-0.384033
0.55184	71.6	69.2245	-0.38449
0.55188	68.87	69.2473	-0.384947
[truncated: 23,003 more rows]

## Sheet: Sheet2
0.68776	52.21	49.979	0.000419693	3.58939e-05
0.6878	48.57	49.948	0.00103961	0.00025252
0.68784	52.26	49.917	0.00165985	0.000477488
0.68788	47.23	49.886	0.00228041	0.00071098
0.68792	52.45	49.8549	0.00290127	0.000953174
0.68796	46.75	49.8239	0.00352242	0.00120424
0.688	52.02	49.7928	0.00414383	0.00146436
0.68804	46.42	49.7617	0.0047655	0.00173368
0.68808	51.73	49.7306	0.00538741	0.00201238
0.68812	46.37	49.6995	0.00600956	0.00230063
0.68816	51.01	49.6684	0.00663196	0.0025986
0.6882	46.8	49.6373	0.00725462	0.00290644
0.68824	50.82	49.6061	0.00787753	0.00322433
0.68828	46.99	49.575	0.00850074	0.00355244
0.68832	51.11	49.5438	0.00912426	0.00389092
0.68836	47.71	49.5126	0.00974813	0.00423994
0.6884	51.3	49.4814	0.0103724	0.00459966
0.68844	47.76	49.4501	0.010997	0.00497023
0.68848	51.68	49.4189	0.0116222	0.0053518
0.68852	47.76	49.3876	0.0122477	0.0057445
0.68856	51.11	49.3563	0.0128739	0.00614847
0.6886	48.86	49.325	0.0135005	0.00656382
0.68864	50.82	49.2936	0.0141277	0.00699068
0.68868	50.06	49.2622	0.0147555	0.00742919
0.68872	49.67	49.2308	0.0153839	0.00787946
0.68876	51.01	49.1994	0.016013	0.00834162
0.6888	48.52	49.1679	0.0166426	0.00881577
0.68884	51.25	49.1364	0.0172729	0.00930204
0.68888	47.66	49.1048	0.0179037	0.00980052
0.68892	51.4	49.0732	0.0185351	0.0103113
0.68896	46.56	49.0416	0.0191671	0.0108345
0.689	52.07	49.01	0.0197997	0.0113701
0.68904	45.6	48.9784	0.0204327	0.0119183
0.68908	50.82	48.9467	0.0210663	0.012479
0.68912	45.7	48.915	0.0217003	0.0130524
0.68916	50.58	48.8833	0.0223349	0.0136385
0.6892	45.65	48.8515	0.0229699	0.0142374
0.68924	50.1	48.8197	0.0236053	0.0148491
0.68928	46.04	48.7879	0.0242413	0.0154737
0.68932	49.72	48.7561	0.0248777	0.0161111
0.68936	46.32	48.7243	0.0255147	0.0167616
0.6894	50.25	48.6924	0.0261522	0.017425
0.68944	46.37	48.6605	0.0267902	0.0181015
0.68948	50.25	48.6286	0.0274289	0.0187912
0.68952	46.85	48.5966	0.0280682	0.019494
0.68956	50.87	48.5646	0.0287082	0.0202101
0.6896	47.28	48.5326	0.0293489	0.0209395
0.68964	50.49	48.5005	0.0299903	0.0216821
0.68968	48	48.4684	0.0306325	0.0224381
0.68972	50.54	48.4362	0.0312756	0.0232074
0.68976	49.39	48.404	0.0319194	0.0239901
0.6898	48.72	48.3718	0.0325641	0.0247861
0.68984	49.63	48.3395	0.0332096	0.0255953
0.68988	47.95	48.3072	0.033856	0.0264179
0.68992	50.63	48.2748	0.0345032	0.0272537
0.68996	46.8	48.2424	0.0351512	0.0281026
0.69	51.01	48.21	0.0358	0.0289648
0.69004	45.6	48.1775	0.0364496	0.0298401
0.69008	50.68	48.145	0.0370999	0.0307285
0.69012	44.31	48.1125	0.0377509	0.0316299
0.69016	50.44	48.0799	0.0384026	0.0325443
0.6902	45.08	48.0473	0.039055	0.0334716
0.69024	49.53	48.0146	0.039708	0.0344116
0.69028	45.17	47.9819	0.0403616	0.0353641
0.69032	49.39	47.9492	0.0410159	0.0363291
0.69036	45.41	47.9165	0.0416709	0.0373063
0.6904	48.81	47.8837	0.0423264	0.0382957
0.69044	45.6	47.8509	0.0429826	0.039297
0.69048	49.05	47.818	0.0436395	0.0403102
0.69052	45.99	47.7852	0.044297	0.041335
0.69056	49.24	47.7522	0.0449552	0.0423714
0.6906	46.18	47.7193	0.0456142	0.043419
0.69064	49.53	47.6863	0.0462738	0.0444778
0.69068	46.9	47.6533	0.0469343	0.0455474
0.69072	49.58	47.6202	0.0475956	0.0466277
0.69076	47.33	47.5871	0.0482576	0.0477182
0.6908	49.19	47.554	0.0489205	0.0488187
0.69084	47.95	47.5208	0.0495842	0.0499288
0.69088	48	47.4876	0.0502487	0.0510483
0.69092	48.96	47.4543	0.050914	0.0521767
0.69096	46.75	47.421	0.0515802	0.0533137
0.691	50.2	47.3876	0.0522471	0.0544589
0.69104	45.65	47.3543	0.0529148	0.055612
0.69108	49.63	47.3208	0.0535832	0.0567727
0.69112	44.5	47.2874	0.0542522	0.0579405
0.69116	49.86	47.2539	0.054922	0.0591151
0.6912	43.83	47.2204	0.0555923	0.060296
0.69124	49.29	47.1868	0.0562633	0.0614827
0.69128	43.69	47.1533	0.0569348	0.0626747
0.69132	48.81	47.1197	0.0576069	0.0638716
0.69136	44.12	47.086	0.0582794	0.0650729
0.6914	48.43	47.0524	0.0589525	0.066278
0.69144	44.17	47.0187	0.0596261	0.0674864
0.69148	47.95	46.985	0.0603002	0.0686975
0.69152	44.22	46.9513	0.0609749	0.0699109
0.69156	48.14	46.9175	0.06165	0.0711259
0.6916	44.98	46.8837	0.0623257	0.0723419
0.69164	48.52	46.8499	0.063002	0.0735583
0.69168	45.17	46.8161	0.0636789	0.0747745
0.69172	48.96	46.7822	0.0643565	0.0759898
0.69176	45.94	46.7483	0.0650347	0.0772035
0.6918	48.67	46.7143	0.0657136	0.078415
0.69184	46.42	46.6803	0.0663932	0.0796234
0.69188	48.48	46.6463	0.0670735	0.080828
0.69192	47.28	46.6123	0.0677546	0.0820281
0.69196	46.85	46.5782	0.0684363	0.0832227
0.692	48.09	46.5441	0.0691188	0.0844111
0.69204	46.04	46.5099	0.069802	0.0855923
0.69208	48.72	46.4757	0.0704859	0.0867655
0.69212	44.55	46.4415	0.0711704	0.0879297
0.69216	49.1	46.4072	0.0718556	0.0890838
0.6922	43.79	46.3729	0.0725414	0.090227
0.69224	48.67	46.3386	0.0732277	0.091358
0.69228	43.16	46.3043	0.0739146	0.0924759
0.69232	48	46.2699	0.0746019	0.0935794
0.69236	43.02	46.2355	0.0752898	0.0946676
0.6924	47.66	46.2011	0.0759781	0.0957392
0.69244	42.92	46.1667	0.0766668	0.0967931
0.69248	47.42	46.1322	0.077356	0.097828
0.69252	43.26	46.0977	0.0780456	0.0988429
0.69256	47.42	46.0632	0.0787356	0.0998365
0.6926	43.21	46.0287	0.0794261	0.100807
0.69264	47.47	45.9941	0.0801171	0.101755
0.69268	44.26	45.9596	0.0808085	0.102676
0.69272	47.42	45.925	0.0815005	0.103571
0.69276	44.65	45.8903	0.082193	0.104438
0.6928	47.62	45.8557	0.0828862	0.105275
0.69284	44.89	45.821	0.0835799	0.106081
0.69288	47.52	45.7863	0.0842742	0.106854
0.69292	45.51	45.7515	0.0849693	0.107593
0.69296	47.57	45.7168	0.0856649	0.108296
0.693	46.08	45.6819	0.0863613	0.108962
0.69304	46.37	45.6471	0.0870583	0.109591
0.69308	47.23	45.6122	0.0877561	0.110181
0.69312	44.84	45.5773	0.0884544	0.110734
0.69316	47.76	45.5423	0.0891535	0.111249
0.6932	43.79	45.5073	0.0898531	0.111727
0.69324	48.14	45.4723	0.0905534	0.112168
0.69328	42.59	45.4373	0.0912543	0.112575
0.69332	47.76	45.4022	0.0919556	0.112948
0.69336	41.97	45.3671	0.0926575	0.11329
0.6934	47.52	45.332	0.0933599	0.113601
0.69344	42.01	45.2969	0.0940628	0.113884
0.69348	46.8	45.2617	0.0947661	0.11414
0.69352	42.21	45.2265	0.0954699	0.114371
0.69356	47.04	45.1913	0.0961741	0.114579
0.6936	42.49	45.1561	0.0968787	0.114765
0.69364	45.94	45.1208	0.0975838	0.114931
0.69368	42.68	45.0855	0.0982893	0.115079
0.69372	46.23	45.0502	0.0989953	0.11521
0.69376	42.88	45.0149	0.0997018	0.115325
0.6938	46.99	44.9796	0.100409	0.115427
0.69384	43.4	44.9442	0.101116	0.115517
0.69388	47.33	44.9088	0.101824	0.115596
0.69392	43.5	44.8733	0.102533	0.115665
0.69396	46.61	44.8379	0.103242	0.115726
0.694	44.55	44.8024	0.103952	0.11578
0.69404	46.42	44.7668	0.104663	0.115829
0.69408	45.6	44.7313	0.105374	0.115873
0.69412	44.84	44.6957	0.106086	0.115914
0.69416	46.61	44.6601	0.106799	0.115953
0.6942	44.26	44.6244	0.107512	0.115989
0.69424	47.04	44.5887	0.108226	0.116026
0.69428	42.68	44.553	0.108941	0.116062
0.69432	47.04	44.5172	0.109656	0.116099
0.69436	41.78	44.4814	0.110371	0.116138
0.6944	46.8	44.4456	0.111087	0.116179
0.69444	41.73	44.4098	0.111804	0.116224
0.69448	46.47	44.374	0.112521	0.116273
0.69452	40.82	44.3381	0.113238	0.116326
0.69456	45.99	44.3022	0.113956	0.116384
0.6946	41.06	44.2663	0.114674	0.116449
0.69464	45.75	44.2304	0.115393	0.116519
0.69468	41.39	44.1944	0.116111	0.116597
0.69472	45.46	44.1585	0.116831	0.116682
0.69476	41.39	44.1225	0.11755	0.116775
0.6948	45.56	44.0865	0.11827	0.116875
0.69484	42.06	44.0505	0.11899	0.116985
0.69488	45.94	44.0145	0.119711	0.117103
0.69492	42.54	43.9784	0.120432	0.11723
0.69496	45.84	43.9423	0.121153	0.117367
0.695	43.16	43.9063	0.121875	0.117513
0.69504	45.51	43.8701	0.122597	0.117669
0.69508	43.5	43.834	0.12332	0.117835
0.69512	45.6	43.7978	0.124043	0.118012
0.69516	44.46	43.7617	0.124767	0.118198
0.6952	44.31	43.7254	0.125491	0.118395
0.69524	45.17	43.6892	0.126216	0.118602
0.69528	42.88	43.653	0.126941	0.11882
0.69532	46.61	43.6167	0.127666	0.119047
0.69536	41.54	43.5804	0.128392	0.119286
0.6954	46.08	43.5441	0.129118	0.119534
0.69544	40.82	43.5078	0.129844	0.119793
0.69548	45.7	43.4714	0.130571	0.120061
0.69552	40.1	43.4351	0.131298	0.12034
0.69556	45.27	43.3987	0.132025	0.120627
0.6956	40.34	43.3624	0.132752	0.120925
0.69564	44.79	43.326	0.133479	0.121231
0.69568	40.05	43.2897	0.134207	0.121546
0.69572	44.55	43.2533	0.134934	0.121868
0.69576	40.91	43.2169	0.135661	0.122199
0.6958	44.17	43.1806	0.136389	0.122537
0.69584	40.72	43.1442	0.137116	0.122882
0.69588	44.46	43.1078	0.137844	0.123233
0.69592	41.15	43.0714	0.138572	0.123589
0.69596	44.6	43.035	0.139299	0.123951
0.696	41.68	42.9986	0.140027	0.124317
0.69604	45.08	42.9622	0.140755	0.124686
0.69608	42.06	42.9258	0.141483	0.125059
0.69612	44.98	42.8894	0.142212	0.125434
0.69616	42.83	42.853	0.14294	0.12581
0.6962	43.98	42.8166	0.143669	0.126188
0.69624	43.83	42.7801	0.144397	0.126567
0.69628	43.21	42.7437	0.145126	0.126946
0.69632	44.55	42.7072	0.145855	0.127324
0.69636	41.82	42.6708	0.146584	0.127701
0.6964	44.5	42.6343	0.147313	0.128076
0.69644	40.87	42.5979	0.148042	0.128449
0.69648	45.27	42.5614	0.148771	0.128818
0.69652	39.81	42.525	0.1495	0.129185
0.69656	45.22	42.4885	0.150229	0.129547
0.6966	39.38	42.4521	0.150958	0.129904
0.69664	44.36	42.4157	0.151686	0.130256
0.69668	38.81	42.3793	0.152415	0.130603
0.69672	43.74	42.3429	0.153143	0.130943
0.69676	39.24	42.3065	0.15387	0.131278
0.6968	43.79	42.2701	0.154598	0.131605
0.69684	39.43	42.2338	0.155325	0.131926
0.69688	43.26	42.1974	0.156051	0.13224
0.69692	39.91	42.1611	0.156777	0.132548
0.69696	43.5	42.1248	0.157503	0.132849
0.697	39.86	42.0886	0.158229	0.133145
0.69704	43.59	42.0523	0.158954	0.133435
0.69708	40.63	42.016	0.159679	0.133721
0.69712	43.93	41.9798	0.160404	0.134003
0.69716	40.91	41.9436	0.161128	0.134281
0.6972	44.12	41.9074	0.161852	0.134557
0.69724	41.25	41.8712	0.162576	0.134831
0.69728	43.35	41.835	0.163299	0.135103
0.69732	42.25	41.7989	0.164022	0.135375
0.69736	42.25	41.7627	0.164745	0.135645
0.6974	43.16	41.7266	0.165468	0.135916
0.69744	40.67	41.6905	0.16619	0.136187
0.69748	44.07	41.6544	0.166912	0.136457
0.69752	40.2	41.6183	0.167634	0.136728
0.69756	44.26	41.5823	0.168355	0.136999
0.6976	38.9	41.5462	0.169075	0.137271
0.69764	43.79	41.5102	0.169795	0.137544
0.69768	38.52	41.4742	0.170515	0.137817
0.69772	43.5	41.4383	0.171234	0.138091
0.69776	38.23	41.4024	0.171953	0.138367
0.6978	42.88	41.3665	0.17267	0.138643
0.69784	38.23	41.3306	0.173387	0.138919
0.69788	42.35	41.2948	0.174104	0.139197
0.69792	38.42	41.259	0.17482	0.139475
0.69796	42.4	41.2233	0.175535	0.139753
0.698	38.81	41.1875	0.176249	0.14003
0.69804	42.45	41.1519	0.176963	0.140308
0.69808	39.05	41.1162	0.177676	0.140584
0.69812	42.83	41.0806	0.178388	0.140858
0.69816	39.09	41.045	0.1791	0.141131
0.6982	42.97	41.0095	0.179811	0.141402
0.69824	39.81	40.9739	0.180521	0.14167
0.69828	42.88	40.9385	0.181231	0.141934
0.69832	40.53	40.903	0.18194	0.142195
0.69836	41.97	40.8676	0.182649	0.142452
0.6984	41.73	40.8321	0.183357	0.142704
0.69844	40.91	40.7968	0.184065	0.14295
0.69848	42.64	40.7614	0.184772	0.143191
0.69852	39.76	40.7261	0.185478	0.143424
0.69856	43.16	40.6908	0.186184	0.143649
0.6986	38.62	40.6555	0.186889	0.143866
0.69864	43.21	40.6203	0.187594	0.144073
0.69868	37.9	40.5851	0.188298	0.14427
0.69872	43.02	40.5499	0.189001	0.144456
0.69876	37.28	40.5148	0.189704	0.144631
0.6988	42.49	40.4797	0.190406	0.144793
0.69884	37.28	40.4447	0.191107	0.144942
0.69888	41.97	40.4096	0.191807	0.145077
0.69892	37.47	40.3747	0.192507	0.145199
0.69896	41.63	40.3397	0.193205	0.145306
0.699	37.61	40.3048	0.193903	0.1454
0.69904	41.44	40.27	0.1946	0.14548
0.69908	37.66	40.2352	0.195297	0.145546
0.69912	41.54	40.2004	0.195992	0.1456
0.69916	38.28	40.1657	0.196687	0.145643
0.6992	41.82	40.1309	0.197381	0.145675
0.69924	38.71	40.0963	0.198075	0.145696
0.69928	42.21	40.0616	0.198767	0.145709
0.69932	39.24	40.027	0.199459	0.145715
0.69936	42.4	39.9925	0.200151	0.145714
0.6994	39.76	39.9579	0.200842	0.145707
0.69944	41.3	39.9234	0.201532	0.145697
0.69948	40.82	39.8889	0.202222	0.145683
0.69952	40.05	39.8545	0.202911	0.145667
0.69956	41.34	39.82	0.203599	0.145649
0.6996	39	39.7856	0.204287	0.145631
0.69964	42.25	39.7513	0.204975	0.145613
0.69968	37.66	39.7169	0.205661	0.145596
0.69972	42.49	39.6826	0.206347	0.14558
0.69976	36.7	39.6484	0.207032	0.145566
0.6998	42.4	39.6142	0.207717	0.145555
0.69984	36.7	39.58	0.2084	0.145546
0.69988	41.54	39.5459	0.209083	0.145541
0.69992	36.37	39.5118	0.209765	0.14554
0.69996	41.2	39.4777	0.210446	0.145544
0.7	36.32	39.4437	0.211126	0.145552
0.70004	40.29	39.4098	0.211805	0.145566
0.70008	36.56	39.3759	0.212483	0.145585
0.70012	40.63	39.342	0.21316	0.14561
0.70016	36.94	39.3082	0.213836	0.145641
0.7002	40.63	39.2744	0.214511	0.145677
0.70024	36.99	39.2407	0.215186	0.145719
0.70028	41.15	39.2071	0.215859	0.145767
0.70032	37.66	39.1734	0.216531	0.14582
0.70036	41.39	39.1398	0.217203	0.145879
0.7004	38.23	39.1063	0.217874	0.145944
0.70044	41.06	39.0728	0.218544	0.146013
0.70048	39.05	39.0394	0.219213	0.146088
0.70052	39.96	39.0059	0.219881	0.146167
0.70056	40.05	38.9726	0.220548	0.146251
0.7006	39	38.9393	0.221215	0.14634
0.70064	40.72	38.906	0.221881	0.146432
0.70068	37.95	38.8727	0.222545	0.146529
0.70072	41.06	38.8395	0.223209	0.146628
0.70076	36.8	38.8064	0.223872	0.14673
0.7008	41.15	38.7733	0.224534	0.146835
0.70084	35.98	38.7402	0.225195	0.146941
0.70088	41.01	38.7072	0.225855	0.147047
0.70092	35.7	38.6743	0.226514	0.147155
0.70096	40.44	38.6414	0.227172	0.147262
0.701	35.03	38.6086	0.227828	0.147368
0.70104	40.29	38.5758	0.228484	0.147472
0.70108	35.41	38.5431	0.229138	0.147575
0.70112	39.76	38.5104	0.229791	0.147676
0.70116	35.6	38.4778	0.230443	0.147773
0.7012	39.57	38.4453	0.231094	0.147868
0.70124	36.03	38.4128	0.231743	0.147959
0.70128	39.62	38.3804	0.232392	0.148046
0.70132	36.56	38.348	0.233039	0.14813
0.70136	39.91	38.3157	0.233685	0.14821
0.7014	37.04	38.2835	0.23433	0.148286
0.70144	40.24	38.2513	0.234974	0.148359
0.70148	37.37	38.2191	0.235617	0.148428
0.70152	39.91	38.187	0.236259	0.148493
0.70156	38.14	38.155	0.2369	0.148556
0.7016	39.72	38.123	0.23754	0.148615
0.70164	38.71	38.091	0.23818	0.148673
0.70168	38.33	38.0591	0.238818	0.148729
0.70172	39.91	38.0273	0.239455	0.148783
0.70176	37.04	37.9955	0.240091	0.148837
0.7018	40.53	37.9637	0.240726	0.148891
0.70184	35.89	37.932	0.24136	0.148945
0.70188	40.58	37.9003	0.241993	0.149002
0.70192	34.83	37.8687	0.242625	0.14906
0.70196	40.1	37.8372	0.243256	0.149121
0.702	34.45	37.8057	0.243886	0.149186
0.70204	39.53	37.7743	0.244514	0.149255
0.70208	34.6	37.7429	0.245141	0.149328
0.70212	39.43	37.7116	0.245767	0.149407
0.70216	34.55	37.6804	0.246392	0.149491
0.7022	39.05	37.6492	0.247016	0.149581
0.70224	34.88	37.6181	0.247638	0.149678
0.70228	38.62	37.587	0.248259	0.149781
0.70232	35.17	37.556	0.248879	0.149891
0.70236	38.81	37.5251	0.249498	0.150008
0.7024	35.6	37.4942	0.250116	0.150133
0.70244	39.38	37.4634	0.250732	0.150264
0.70248	36.08	37.4326	0.251348	0.150402
0.70252	39.53	37.4019	0.251962	0.150548
0.70256	36.61	37.3712	0.252575	0.150701
0.7026	39.19	37.3406	0.253187	0.150861
0.70264	37.04	37.3101	0.253799	0.151027
0.70268	38.42	37.2796	0.254409	0.151201
0.70272	38.09	37.2491	0.255018	0.15138
0.70276	37.28	37.2187	0.255626	0.151566
0.7028	38.9	37.1883	0.256234	0.151757
0.70284	36.17	37.158	0.25684	0.151953
0.70288	39.57	37.1277	0.257445	0.152154
0.70292	34.79	37.0975	0.258049	0.152359
0.70296	39.57	37.0674	0.258653	0.152568
0.703	34.5	37.0373	0.259255	0.15278
0.70304	39.33	37.0072	0.259856	0.152995
0.70308	33.49	36.9772	0.260456	0.153211
0.70312	38.71	36.9473	0.261054	0.15343
0.70316	33.49	36.9174	0.261652	0.153649
0.7032	38.47	36.8876	0.262248	0.153869
0.70324	33.88	36.8578	0.262844	0.154089
0.70328	37.9	36.8281	0.263438	0.15431
0.70332	34.4	36.7985	0.264031	0.15453
0.70336	37.85	36.7689	0.264623	0.15475
0.7034	34.55	36.7393	0.265213	0.154969
0.70344	38.28	36.7098	0.265803	0.155187
0.70348	35.03	36.6804	0.266392	0.155405
0.70352	38.38	36.651	0.266979	0.155623
0.70356	35.55	36.6217	0.267566	0.155839
0.7036	38.33	36.5924	0.268152	0.156055
0.70364	36.03	36.5632	0.268737	0.15627
0.70368	38.52	36.534	0.269321	0.156485
0.70372	36.65	36.5048	0.269904	0.1567
0.70376	37.52	36.4757	0.270486	0.156914
0.7038	37.42	36.4466	0.271068	0.157128
0.70384	36.22	36.4176	0.271648	0.157343
0.70388	38.47	36.3886	0.272228	0.157558
0.70392	35.27	36.3596	0.272807	0.157774
0.70396	38.86	36.3307	0.273385	0.157991
0.704	33.97	36.3019	0.273962	0.15821
0.70404	39.09	36.2731	0.274539	0.158431
0.70408	33.06	36.2443	0.275114	0.158655
0.70412	38.09	36.2156	0.275689	0.158881
0.70416	32.78	36.1869	0.276262	0.159111
0.7042	37.75	36.1583	0.276834	0.159344
0.70424	33.06	36.1297	0.277406	0.159582
0.70428	37.42	36.1012	0.277976	0.159823
0.70432	32.87	36.0727	0.278546	0.160069
0.70436	37.42	36.0443	0.279114	0.16032
0.7044	33.69	36.0159	0.279682	0.160575
0.70444	37.56	35.9876	0.280248	0.160834
0.70448	33.88	35.9593	0.280814	0.161099
0.70452	37.37	35.9311	0.281379	0.161367
0.70456	33.97	35.9029	0.281943	0.16164
0.7046	37.71	35.8747	0.282506	0.161917
0.70464	34.74	35.8466	0.283068	0.162197
0.70468	37.9	35.8185	0.28363	0.162481
0.70472	34.98	35.7905	0.28419	0.162768
0.70476	37.56	35.7625	0.284751	0.163057
0.7048	35.89	35.7345	0.28531	0.163348
0.70484	36.84	35.7066	0.285869	0.163642
0.70488	36.84	35.6787	0.286427	0.163936
0.70492	35.65	35.6508	0.286984	0.164231
0.70496	37.99	35.6229	0.287541	0.164526
0.705	34.16	35.5951	0.288097	0.16482
0.70504	37.99	35.5674	0.288653	0.165114
0.70508	33.54	35.5396	0.289208	0.165406
0.70512	38.57	35.5119	0.289762	0.165696
0.70516	32.63	35.4842	0.290315	0.165984
0.7052	37.37	35.4566	0.290868	0.16627
0.70524	32.01	35.429	0.291419	0.166554
0.70528	37.23	35.4015	0.29197	0.166835
0.70532	32.25	35.374	0.29252	0.167113
0.70536	36.8	35.3465	0.293069	0.167389
0.7054	32.3	35.3191	0.293618	0.167662
0.70544	36.32	35.2917	0.294165	0.167932
0.70548	32.63	35.2644	0.294712	0.1682
0.70552	36.56	35.2371	0.295258	0.168465
0.70556	33.11	35.2099	0.295803	0.168728
0.7056	36.46	35.1827	0.296347	0.168988
0.70564	33.59	35.1555	0.29689	0.169246
0.70568	36.89	35.1284	0.297433	0.169502
0.70572	33.78	35.1013	0.297975	0.169755
0.70576	36.84	35.0742	0.298516	0.170007
0.7058	34.16	35.0472	0.299056	0.170257
0.70584	36.61	35.0202	0.299596	0.170506
0.70588	34.93	34.9932	0.300136	0.170753
0.70592	35.94	34.9663	0.300674	0.170999
0.70596	36.08	34.9394	0.301213	0.171245
0.706	34.83	34.9125	0.30175	0.171489
0.70604	36.84	34.8856	0.302287	0.171734
0.70608	33.49	34.8588	0.302824	0.17198
0.70612	37.04	34.832	0.303359	0.172226
0.70616	32.68	34.8053	0.303895	0.172474
0.7062	37.28	34.7785	0.304429	0.172723
0.70624	31.91	34.7518	0.304963	0.172975
0.70628	36.94	34.7252	0.305497	0.173229
0.70632	31.24	34.6985	0.306029	0.173487
0.70636	36.7	34.6719	0.306561	0.173747
0.7064	31.63	34.6454	0.307093	0.174011
0.70644	35.6	34.6188	0.307624	0.174279
0.70648	31.24	34.5923	0.308154	0.17455
0.70652	35.98	34.5659	0.308683	0.174826
0.70656	32.01	34.5394	0.309212	0.175105
0.7066	35.89	34.513	0.30974	0.175387
0.70664	32.49	34.4866	0.310267	0.175673
0.70668	36.03	34.4603	0.310794	0.175963
0.70672	33.16	34.434	0.311321	0.176256
0.70676	36.22	34.4077	0.311847	0.176551
0.7068	32.87	34.3814	0.312373	0.176849
0.70684	36.22	34.3551	0.312898	0.17715
0.70688	33.49	34.3289	0.313423	0.177452
0.70692	35.98	34.3026	0.313947	0.177756
0.70696	34.88	34.2764	0.314472	0.178061
0.707	35.65	34.2502	0.314996	0.178368
0.70704	35.36	34.224	0.31552	0.178675
0.70708	34.12	34.1978	0.316043	0.178984
0.70712	36.32	34.1717	0.316567	0.179293
0.70716	32.87	34.1455	0.31709	0.179602
0.7072	36.46	34.1194	0.317612	0.179913
0.70724	31.82	34.0933	0.318135	0.180223
0.70728	36.75	34.0671	0.318657	0.180535
0.70732	31.39	34.041	0.319179	0.180847
0.70736	36.41	34.015	0.319701	0.181159
0.7074	30.77	33.9889	0.320222	0.181472
0.70744	35.79	33.9629	0.320743	0.181786
0.70748	30.57	33.9369	0.321263	0.182101
0.70752	35.07	33.9109	0.321783	0.182416
0.70756	30.91	33.8849	0.322302	0.182732
0.7076	35.17	33.8589	0.322821	0.183049
0.70764	31.44	33.833	0.32334	0.183367
0.70768	34.93	33.8071	0.323859	0.183685
0.70772	31.63	33.7812	0.324377	0.184005
0.70776	35.22	33.7553	0.324894	0.184325
0.7078	32.06	33.7294	0.325412	0.184647
0.70784	36.03	33.7036	0.325929	0.18497
0.70788	32.11	33.6777	0.326445	0.185294
0.70792	36.13	33.6519	0.326962	0.185621
0.70796	32.92	33.6261	0.327479	0.18595
0.708	35.31	33.6003	0.327995	0.186282
0.70804	33.93	33.5744	0.328511	0.186618
0.70808	34.26	33.5486	0.329027	0.186957
0.70812	34.88	33.5229	0.329543	0.1873
0.70816	33.11	33.4971	0.330059	0.187648
0.7082	35.89	33.4713	0.330574	0.188001
0.70824	32.06	33.4455	0.33109	0.188359
0.70828	36.32	33.4198	0.331605	0.188724
0.70832	30.91	33.394	0.33212	0.189095
0.70836	35.46	33.3683	0.332635	0.189472
0.7084	30.62	33.3425	0.333149	0.189857
0.70844	35.46	33.3168	0.333664	0.190248
0.70848	29.81	33.2911	0.334177	0.190647
0.70852	35.07	33.2654	0.334691	0.191052
0.70856	29.81	33.2398	0.335204	0.191464
0.7086	34.69	33.2141	0.335717	0.191883
0.70864	30.34	33.1885	0.33623	0.192308
0.70868	34.31	33.1629	0.336742	0.19274
0.70872	30.67	33.1373	0.337253	0.193177
0.70876	33.97	33.1118	0.337765	0.19362
0.7088	30.77	33.0862	0.338276	0.194068
0.70884	34.5	33.0607	0.338787	0.194521
0.70888	31.53	33.0351	0.339297	0.194978
0.70892	34.83	33.0096	0.339807	0.19544
0.70896	31.82	32.9841	0.340317	0.195905
0.709	34.88	32.9586	0.340827	0.196374
0.70904	32.44	32.9331	0.341337	0.196847
0.70908	34.64	32.9077	0.341847	0.197323
0.70912	32.97	32.8822	0.342356	0.197802
0.70916	34.02	32.8567	0.342866	0.198285
0.7092	33.97	32.8312	0.343375	0.198771
0.70924	32.63	32.8058	0.343885	0.19926
0.70928	34.98	32.7803	0.344394	0.199752
0.70932	31.24	32.7548	0.344903	0.200247
0.70936	35.36	32.7294	0.345413	0.200745
0.7094	30.34	32.7039	0.345922	0.201246
0.70944	35.31	32.6785	0.34643	0.201749
0.70948	29.62	32.653	0.346939	0.202256
0.70952	34.93	32.6276	0.347448	0.202765
0.70956	29.19	32.6022	0.347956	0.203276
0.7096	34.12	32.5768	0.348464	0.20379
0.70964	29.33	32.5514	0.348972	0.204307
0.70968	33.35	32.526	0.349479	0.204826
0.70972	29.81	32.5007	0.349987	0.205348
0.70976	34.16	32.4753	0.350494	0.205872
0.7098	29.9	32.45	0.351001	0.206399
0.70984	33.78	32.4246	0.351508	0.206928
0.70988	30.67	32.3993	0.352014	0.207461
0.70992	33.88	32.374	0.35252	0.207996
0.70996	30.34	32.3487	0.353027	0.208535
0.71	34.07	32.3234	0.353533	0.209077
0.71004	31.29	32.2981	0.354039	0.209622
0.71008	34.55	32.2727	0.354545	0.210171
0.71012	31.58	32.2474	0.355051	0.210724
0.71016	33.64	32.2221	0.355557	0.21128
0.7102	32.97	32.1968	0.356063	0.21184
0.71024	32.97	32.1715	0.35657	0.212403
0.71028	33.45	32.1462	0.357076	0.21297
0.71032	31.68	32.1209	0.357582	0.213539
0.71036	34.69	32.0956	0.358089	0.214112
0.7104	30.57	32.0702	0.358595	0.214688
0.71044	34.5	32.0449	0.359102	0.215265
0.71048	29.57	32.0196	0.359608	0.215845
0.71052	34.36	31.9943	0.360114	0.216426
0.71056	29.14	31.969	0.360621	0.217008
0.7106	33.78	31.9437	0.361127	0.217591
0.71064	28.61	31.9184	0.361633	0.218174
0.71068	33.64	31.8931	0.362139	0.218757
0.71072	28.71	31.8678	0.362644	0.21934
0.71076	33.06	31.8425	0.36315	0.219922
0.7108	28.85	31.8172	0.363655	0.220503
0.71084	32.78	31.792	0.364161	0.221083
0.71088	29.33	31.7667	0.364666	0.221662
0.71092	33.21	31.7415	0.365171	0.22224
0.71096	29.62	31.7162	0.365676	0.222816
0.711	33.49	31.691	0.366181	0.22339
0.71104	30.24	31.6657	0.366685	0.223964
0.71108	33.69	31.6405	0.36719	0.224536
0.71112	30.53	31.6153	0.367695	0.225106
0.71116	33.69	31.59	0.3682	0.225676
0.7112	31.2	31.5648	0.368705	0.226244
0.71124	33.3	31.5395	0.36921	0.226811
0.71128	31.96	31.5143	0.369715	0.227377
0.71132	32.49	31.489	0.37022	0.227942
0.71136	32.87	31.4637	0.370725	0.228506
0.7114	31.01	31.4385	0.371231	0.22907
0.71144	33.4	31.4132	0.371736	0.229632
0.71148	29.86	31.3879	0.372242	0.230194
0.71152	34.31	31.3626	0.372747	0.230755
0.71156	28.66	31.3374	0.373253	0.231316
0.7116	34.02	31.3121	0.373758	0.231876
0.71164	28.13	31.2868	0.374263	0.232436
0.71168	33.35	31.2616	0.374769	0.232995
0.71172	27.51	31.2363	0.375274	0.233554
0.71176	32.78	31.2111	0.375779	0.234113
0.7118	28.04	31.1858	0.376283	0.234673
0.71184	32.2	31.1606	0.376788	0.235232
0.71188	28.42	31.1354	0.377292	0.235792
0.71192	32.01	31.1102	0.377796	0.236352
0.71196	28.56	31.085	0.3783	0.236913
0.712	32.3	31.0598	0.378804	0.237474
0.71204	28.8	31.0346	0.379307	0.238036
0.71208	32.54	31.0095	0.379811	0.238598
0.71212	29.28	30.9843	0.380314	0.23916
0.71216	32.58	30.9591	0.380817	0.239722
0.7122	29.52	30.934	0.38132	0.240285
0.71224	33.02	30.9088	0.381824	0.240847
0.71228	30.29	30.8837	0.382327	0.241408
0.71232	32.49	30.8585	0.38283	0.241968
0.71236	31.39	30.8333	0.383334	0.242526
0.7124	31.48	30.8081	0.383837	0.243083
0.71244	32.2	30.783	0.384341	0.243637
0.71248	30.38	30.7578	0.384844	0.244189
0.71252	32.92	30.7326	0.385348	0.244738
0.71256	29.28	30.7074	0.385852	0.245283
0.7126	33.06	30.6822	0.386356	0.245825
0.71264	28.37	30.657	0.38686	0.246363
0.71268	33.4	30.6318	0.387364	0.246897
0.71272	27.56	30.6066	0.387868	0.247427
0.71276	32.87	30.5814	0.388372	0.247953
0.7128	27.37	30.5562	0.388876	0.248475
0.71284	32.49	30.531	0.38938	0.248992
0.71288	27.46	30.5058	0.389884	0.249506
0.71292	31.87	30.4806	0.390388	0.250016
0.71296	27.7	30.4554	0.390892	0.250522
0.713	31.77	30.4302	0.391396	0.251025
0.71304	28.13	30.405	0.3919	0.251525
0.71308	31.58	30.3798	0.392403	0.252021
0.71312	28.61	30.3546	0.392907	0.252515
0.71316	31.63	30.3295	0.393411	0.253006
0.7132	28.32	30.3043	0.393915	0.253495
0.71324	32.35	30.2791	0.394419	0.253981
0.71328	29.33	30.2539	0.394923	0.254465
0.71332	32.68	30.2287	0.395427	0.254947
0.71336	29.71	30.2035	0.395931	0.255428
0.7134	31.82	30.1782	0.396435	0.255906
0.71344	30.24	30.153	0.39694	0.256383
0.71348	31.05	30.1278	0.397444	0.256858
0.71352	31.58	30.1026	0.397949	0.257332
0.71356	29.66	30.0773	0.398454	0.257804
0.7136	32.49	30.0521	0.398959	0.258275
0.71364	28.28	30.0268	0.399464	0.258745
0.71368	32.78	30.0016	0.399969	0.259213
0.71372	27.61	29.9763	0.400474	0.25968
0.71376	33.06	29.951	0.400979	0.260147
0.7138	26.84	29.9258	0.401484	0.260611
0.71384	32.01	29.9005	0.401989	0.261075
0.71388	26.65	29.8753	0.402494	0.261537
0.71392	31.44	29.8501	0.402999	0.261998
0.71396	26.79	29.8248	0.403503	0.262457
0.714	30.96	29.7996	0.404008	0.262914
0.71404	26.98	29.7744	0.404512	0.263369
0.71408	31.05	29.7492	0.405015	0.263822
0.71412	27.13	29.724	0.405519	0.264272
0.71416	31.05	29.6989	0.406022	0.26472
0.7142	27.42	29.6737	0.406525	0.265164
0.71424	31.24	29.6486	0.407028	0.265605
0.71428	27.61	29.6234	0.407531	0.266042
0.71432	31.68	29.5983	0.408033	0.266475
0.71436	28.8	29.5732	0.408536	0.266904
0.7144	31.39	29.5481	0.409038	0.267328
0.71444	29.14	29.523	0.40954	0.267747
0.71448	30.91	29.4979	0.410042	0.268162
0.71452	29.95	29.4728	0.410543	0.268572
0.71456	30.29	29.4477	0.411045	0.268977
0.7146	31.2	29.4227	0.411546	0.269377
0.71464	29.28	29.3976	0.412048	0.269772
0.71468	31.53	29.3726	0.412549	0.270162
0.71472	27.61	29.3475	0.413049	0.270548
0.71476	31.82	29.3225	0.41355	0.27093
0.7148	27.22	29.2975	0.41405	0.271307
0.71484	31.58	29.2725	0.41455	0.271681
0.71488	26.22	29.2475	0.415049	0.272051
0.71492	31.48	29.2226	0.415548	0.272418
0.71496	25.88	29.1977	0.416047	0.272781
0.715	30.67	29.1728	0.416545	0.273143
0.71504	25.88	29.1479	0.417042	0.273501
0.71508	30.67	29.1231	0.417539	0.273858
0.71512	25.93	29.0983	0.418035	0.274213
0.71516	30	29.0735	0.41853	0.274566
0.7152	26.84	29.0487	0.419025	0.274917
0.71524	30.53	29.024	0.419519	0.275268
0.71528	26.65	28.9994	0.420013	0.275617
0.71532	30.24	28.9747	0.420506	0.275966
0.71536	27.37	28.9501	0.420998	0.276314
0.7154	30.86	28.9255	0.42149	0.276662
0.71544	27.75	28.9009	0.421981	0.277009
0.71548	30.86	28.8764	0.422472	0.277357
0.71552	28.37	28.8519	0.422962	0.277704
0.71556	30.34	28.8274	0.423452	0.278051
0.7156	29.23	28.803	0.423941	0.278399
0.71564	29.76	28.7785	0.424429	0.278746
0.71568	30.19	28.7541	0.424917	0.279094
0.71572	28.28	28.7298	0.425405	0.279441
0.71576	30.86	28.7054	0.425892	0.279789
0.7158	27.08	28.6811	0.426378	0.280136
0.71584	31.63	28.6568	0.426863	0.280483
0.71588	26.27	28.6326	0.427348	0.28083
0.71592	31.1	28.6084	0.427832	0.281176
0.71596	25.64	28.5842	0.428315	0.281521
0.716	30.57	28.5601	0.428798	0.281865
0.71604	25.55	28.536	0.429279	0.282207
0.71608	29.66	28.512	0.42976	0.282548
0.71612	25.69	28.488	0.43024	0.282887
0.71616	29.9	28.4641	0.430718	0.283224
0.7162	25.74	28.4402	0.431196	0.283559
0.71624	29.52	28.4164	0.431673	0.283891
0.71628	25.79	28.3926	0.432149	0.284221
0.71632	29.47	28.3688	0.432623	0.284549
0.71636	26.51	28.3452	0.433097	0.284875
0.7164	30.05	28.3215	0.43357	0.285198
0.71644	26.36	28.2979	0.434041	0.285519
0.71648	30.29	28.2744	0.434512	0.285839
0.71652	26.94	28.2509	0.434982	0.286156
0.71656	29.52	28.2275	0.435451	0.286472
0.7166	27.65	28.2041	0.435919	0.286787
0.71664	30.14	28.1807	0.436385	0.287101
0.71668	28.61	28.1574	0.436851	0.287414
0.71672	28.71	28.1342	0.437316	0.287726
0.71676	29.76	28.111	0.43778	0.288039
0.7168	27.7	28.0878	0.438243	0.288352
0.71684	30.34	28.0647	0.438706	0.288665
0.71688	26.51	28.0417	0.439167	0.288978
0.71692	30.29	28.0187	0.439626	0.289293
0.71696	25.79	27.9957	0.440085	0.289608
0.717	30.48	27.9729	0.440543	0.289924
0.71704	24.69	27.95	0.440999	0.290242
0.71708	29.86	27.9273	0.441455	0.29056
0.71712	24.83	27.9046	0.441909	0.29088
0.71716	29.52	27.8819	0.442361	0.291202
0.7172	24.45	27.8594	0.442813	0.291525
0.71724	29.57	27.8369	0.443263	0.291849
0.71728	24.54	27.8144	0.443711	0.292174
0.71732	28.8	27.7921	0.444159	0.292501
0.71736	25.31	27.7698	0.444604	0.29283
0.7174	28.99	27.7476	0.445049	0.29316
0.71744	25.79	27.7254	0.445492	0.293491
0.71748	29.19	27.7033	0.445934	0.293824
0.71752	26.03	27.6813	0.446374	0.294158
0.71756	29.43	27.6593	0.446814	0.294493
0.7176	26.27	27.6374	0.447252	0.294829
0.71764	29.66	27.6156	0.447688	0.295166
0.71768	26.94	27.5938	0.448124	0.295504
0.71772	29.23	27.5721	0.448558	0.295842
0.71776	27.61	27.5505	0.448991	0.296181
0.7178	28.42	27.5289	0.449423	0.296521
0.71784	28.76	27.5073	0.449853	0.29686
0.71788	27.32	27.4859	0.450282	0.297199
0.71792	29.81	27.4645	0.450711	0.297538
0.71796	26.17	27.4431	0.451137	0.297876
0.718	30.05	27.4219	0.451563	0.298213
0.71804	25.02	27.4006	0.451987	0.29855
0.71808	30	27.3795	0.45241	0.298885
0.71812	24.4	27.3584	0.452831	0.299219
0.71816	29.57	27.3374	0.453251	0.299552
0.7182	24.45	27.3165	0.45367	0.299883
0.71824	28.56	27.2957	0.454087	0.300212
0.71828	24.26	27.2749	0.454502	0.30054
0.71832	28.42	27.2542	0.454916	0.300867
0.71836	24.26	27.2336	0.455329	0.301191
0.7184	28.52	27.213	0.45574	0.301515
0.71844	24.54	27.1926	0.456149	0.301837
0.71848	28.85	27.1722	0.456557	0.302157
0.71852	25.02	27.1519	0.456963	0.302477
0.71856	28.66	27.1316	0.457367	0.302795
0.7186	25.6	27.1115	0.457771	0.303112
0.71864	28.66	27.0914	0.458172	0.303428
0.71868	25.98	27.0714	0.458572	0.303743
0.71872	28.76	27.0514	0.458971	0.304057
0.71876	26.51	27.0316	0.459368	0.304369
0.7188	29.04	27.0118	0.459764	0.304681
0.71884	27.13	26.9921	0.460158	0.304991
0.71888	28.09	26.9724	0.460551	0.305301
0.71892	28.04	26.9529	0.460943	0.305609
0.71896	26.84	26.9334	0.461333	0.305915
0.719	29.23	26.9139	0.461721	0.30622
0.71904	25.64	26.8946	0.462108	0.306523
0.71908	29.52	26.8753	0.462494	0.306824
0.71912	24.4	26.8561	0.462877	0.307123
0.71916	29.47	26.837	0.46326	0.30742
0.7192	23.78	26.818	0.46364	0.307715
0.71924	29.14	26.7991	0.464019	0.308007
0.71928	23.78	26.7802	0.464396	0.308297
0.71932	28.23	26.7614	0.464771	0.308584
0.71936	23.63	26.7428	0.465145	0.308868
0.7194	28.32	26.7242	0.465516	0.309149
0.71944	23.44	26.7057	0.465886	0.309427
0.71948	27.99	26.6873	0.466254	0.309702
0.71952	24.02	26.669	0.46662	0.309974
0.71956	27.89	26.6508	0.466984	0.310243
0.7196	24.45	26.6327	0.467346	0.310508
0.71964	28.09	26.6147	0.467706	0.31077
0.71968	24.97	26.5968	0.468064	0.311028
0.71972	28.52	26.579	0.46842	0.311283
0.71976	25.5	26.5612	0.468775	0.311534
0.7198	28.18	26.5436	0.469128	0.31178
0.71984	26.22	26.5261	0.469479	0.312023
0.71988	28.47	26.5086	0.469828	0.312261
0.71992	26.65	26.4913	0.470175	0.312495
0.71996	27.18	26.474	0.47052	0.312725
0.72	28.04	26.4568	0.470864	0.31295
0.72004	26.36	26.4397	0.471205	0.313171
0.72008	28.18	26.4227	0.471545	0.313387
0.72012	25.02	26.4058	0.471883	0.313599
0.72016	28.99	26.3891	0.472219	0.313806
0.7202	23.73	26.3724	0.472553	0.314008
0.72024	28.9	26.3558	0.472884	0.314206
0.72028	23.06	26.3393	0.473214	0.3144
0.72032	28.61	26.3229	0.473541	0.314589
0.72036	23.06	26.3067	0.473867	0.314775
0.7204	27.8	26.2905	0.47419	0.314956
0.72044	23.11	26.2745	0.474511	0.315133
0.72048	27.65	26.2585	0.474829	0.315306
0.72052	22.92	26.2427	0.475145	0.315476
0.72056	26.94	26.227	0.475459	0.315641
0.7206	23.49	26.2115	0.475771	0.315803
0.72064	27.42	26.196	0.47608	0.315961
0.72068	23.68	26.1806	0.476387	0.316115
0.72072	27.8	26.1654	0.476692	0.316266
0.72076	24.59	26.1503	0.476994	0.316412
0.7208	27.94	26.1353	0.477295	0.316555
0.72084	24.78	26.1204	0.477593	0.316693
0.72088	27.94	26.1056	0.477889	0.316827
0.72092	25.5	26.0909	0.478183	0.316958
0.72096	27.75	26.0763	0.478475	0.317083
0.721	26.75	26.0618	0.478764	0.317205
0.72104	26.84	26.0474	0.479052	0.317322
0.72108	27.13	26.0331	0.479337	0.317435
0.72112	25.84	26.019	0.479621	0.317543
0.72116	28.32	26.0049	0.479902	0.317647
0.7212	24.45	25.9909	0.480181	0.317746
0.72124	28.99	25.9771	0.480458	0.31784
0.72128	23.44	25.9633	0.480733	0.317931
0.72132	28.47	25.9497	0.481006	0.318016
0.72136	22.63	25.9362	0.481276	0.318098
0.7214	27.75	25.9228	0.481545	0.318175
0.72144	22.82	25.9095	0.481811	0.318248
0.72148	27.65	25.8963	0.482074	0.318317
0.72152	22.72	25.8832	0.482335	0.318382
0.72156	26.89	25.8703	0.482594	0.318442
0.7216	23.01	25.8574	0.482851	0.318499
0.72164	26.89	25.8447	0.483105	0.318551
0.72168	23.44	25.8321	0.483357	0.318599
0.72172	26.94	25.8196	0.483607	0.318644
0.72176	23.87	25.8073	0.483855	0.318684
0.7218	27.18	25.795	0.4841	0.31872
0.72184	23.97	25.7829	0.484343	0.318753
0.72188	27.99	25.7708	0.484583	0.318781
0.72192	24.4	25.7589	0.484822	0.318805
0.72196	27.85	25.7471	0.485059	0.318825
0.722	25.31	25.7354	0.485293	0.318841
0.72204	27.56	25.7237	0.485525	0.318854
0.72208	26.07	25.7122	0.485756	0.318862
0.72212	26.31	25.7008	0.485984	0.318865
0.72216	27.13	25.6895	0.48621	0.318865
0.7222	25.69	25.6783	0.486434	0.318861
0.72224	27.75	25.6672	0.486656	0.318853
0.72228	24.35	25.6562	0.486876	0.31884
0.72232	28.28	25.6453	0.487094	0.318824
0.72236	23.11	25.6345	0.48731	0.318803
0.7224	27.99	25.6238	0.487523	0.318778
0.72244	22.48	25.6133	0.487735	0.318749
0.72248	28.09	25.6028	0.487944	0.318716
0.72252	22.2	25.5925	0.488151	0.318678
0.72256	26.98	25.5822	0.488356	0.318637
0.7226	22.15	25.5721	0.488558	0.318591
0.72264	27.08	25.5621	0.488758	0.31854
0.72268	22.58	25.5522	0.488956	0.318485
0.72272	26.6	25.5424	0.489152	0.318426
0.72276	23.2	25.5328	0.489345	0.318362
0.7228	26.79	25.5232	0.489536	0.318294
0.72284	23.15	25.5138	0.489725	0.318221
0.72288	26.84	25.5044	0.489911	0.318143
0.72292	23.87	25.4952	0.490096	0.318062
0.72296	27.42	25.4861	0.490278	0.317975
0.723	23.87	25.4771	0.490458	0.317884
0.72304	27.7	25.4682	0.490636	0.317789
0.72308	24.69	25.4594	0.490812	0.317689
0.72312	27.51	25.4507	0.490986	0.317585
0.72316	25.74	25.4421	0.491159	0.317477
0.7232	26.22	25.4336	0.491329	0.317365
0.72324	26.79	25.4252	0.491497	0.317248
0.72328	25.02	25.4168	0.491663	0.317127
0.72332	27.51	25.4086	0.491827	0.317003
0.72336	23.83	25.4005	0.49199	0.316874
0.7234	27.99	25.3925	0.49215	0.316742
0.72344	22.82	25.3846	0.492308	0.316605
0.72348	27.56	25.3768	0.492464	0.316465
0.72352	22.53	25.3691	0.492618	0.316322
0.72356	27.61	25.3615	0.492771	0.316174
0.7236	22.01	25.354	0.492921	0.316023
0.72364	27.22	25.3466	0.493069	0.315869
0.72368	22.25	25.3393	0.493214	0.315711
0.72372	26.6	25.3321	0.493358	0.315549
0.72376	22.48	25.325	0.4935	0.315383
0.7238	26.65	25.318	0.493639	0.315214
0.72384	23.11	25.3112	0.493777	0.315042
0.72388	26.41	25.3044	0.493912	0.314865
0.72392	22.87	25.2977	0.494046	0.314685
0.72396	27.08	25.2911	0.494178	0.314502
0.724	23.49	25.2846	0.494307	0.314314
0.72404	27.13	25.2783	0.494435	0.314123
0.72408	24.11	25.272	0.494561	0.313928
0.72412	27.13	25.2658	0.494685	0.313729
0.72416	24.54	25.2597	0.494807	0.313526
0.7242	26.75	25.2536	0.494927	0.313319
0.72424	25.26	25.2477	0.495046	0.313108
0.72428	26.12	25.2419	0.495163	0.312892
0.72432	26.31	25.2361	0.495278	0.312673
0.72436	24.78	25.2304	0.495391	0.312448
0.7244	27.65	25.2248	0.495503	0.31222
0.72444	23.92	25.2193	0.495613	0.311987
0.72448	27.7	25.2139	0.495722	0.311749
0.72452	22.68	25.2086	0.495829	0.311507
0.72456	27.8	25.2033	0.495934	0.31126
0.7246	22.05	25.1982	0.496037	0.311008
0.72464	27.42	25.1931	0.496138	0.310751
0.72468	21.86	25.1881	0.496238	0.31049
0.72472	27.13	25.1832	0.496336	0.310224
0.72476	21.67	25.1784	0.496432	0.309953
0.7248	26.6	25.1737	0.496527	0.309677
0.72484	22.34	25.169	0.49662	0.309397
0.72488	26.27	25.1645	0.496711	0.309112
0.72492	22.92	25.16	0.4968	0.308822
0.72496	26.22	25.1556	0.496888	0.308528
0.725	23.39	25.1513	0.496974	0.30823
0.72504	26.17	25.1471	0.497058	0.307927
0.72508	23.25	25.1429	0.497141	0.307619
0.72512	27.32	25.1389	0.497223	0.307308
0.72516	23.54	25.1349	0.497303	0.306992
0.7252	27.46	25.1309	0.497381	0.306672
0.72524	24.16	25.1271	0.497458	0.306348
0.72528	26.94	25.1233	0.497534	0.30602
0.72532	25.31	25.1196	0.497609	0.305688
0.72536	26.27	25.1159	0.497682	0.305352
0.7254	26.55	25.1123	0.497754	0.305012
0.72544	24.78	25.1088	0.497825	0.304669
0.72548	27.42	25.1053	0.497895	0.304321
0.72552	23.54	25.1019	0.497963	0.30397
0.72556	27.7	25.0985	0.49803	0.303616
0.7256	22.25	25.0952	0.498096	0.303258
0.72564	27.85	25.092	0.498161	0.302896
0.72568	21.86	25.0888	0.498224	0.302531
0.72572	27.65	25.0857	0.498287	0.302163
0.72576	22.29	25.0826	0.498347	0.301791
0.7258	27.03	25.0796	0.498407	0.301416
0.72584	21.58	25.0767	0.498466	0.301038
0.72588	26.65	25.0739	0.498523	0.300657
0.72592	21.96	25.0711	0.498579	0.300273
0.72596	26.46	25.0683	0.498633	0.299887
0.726	22.58	25.0657	0.498687	0.299497
0.72604	26.51	25.0631	0.498739	0.299104
0.72608	22.48	25.0605	0.49879	0.298708
0.72612	26.75	25.058	0.49884	0.29831
0.72616	23.54	25.0556	0.498889	0.297909
0.7262	26.84	25.0532	0.498937	0.297504
0.72624	23.44	25.0508	0.498984	0.297097
0.72628	27.61	25.0485	0.49903	0.296687
0.72632	24.21	25.0463	0.499075	0.296274
0.72636	27.08	25.0441	0.499119	0.295858
0.7264	25.31	25.0419	0.499162	0.29544
0.72644	26.12	25.0398	0.499205	0.295019
0.72648	26.17	25.0377	0.499246	0.294595
0.72652	25.07	25.0356	0.499287	0.294168
0.72656	26.89	25.0336	0.499327	0.293739
0.7266	23.78	25.0317	0.499366	0.293308
0.72664	27.42	25.0298	0.499405	0.292874
0.72668	22.63	25.0279	0.499442	0.292438
0.72672	27.7	25.026	0.499479	0.292
0.72676	22.25	25.0243	0.499515	0.29156
0.7268	27.42	25.0225	0.49955	0.291118
0.72684	21.67	25.0208	0.499584	0.290674
0.72688	26.84	25.0192	0.499617	0.290228
0.72692	21.86	25.0175	0.499649	0.289781
0.72696	26.27	25.016	0.49968	0.289332
0.727	22.01	25.0145	0.499711	0.288881
0.72704	25.84	25.013	0.49974	0.288429
0.72708	22.2	25.0116	0.499768	0.287975
0.72712	26.17	25.0102	0.499796	0.287519
0.72716	22.82	25.0089	0.499823	0.287062
0.7272	26.46	25.0076	0.499849	0.286603
0.72724	23.3	25.0063	0.499874	0.286142
0.72728	26.6	25.0051	0.499898	0.285679
0.72732	23.83	25.0039	0.499922	0.285215
0.72736	27.22	25.0027	0.499945	0.284748
0.7274	24.35	25.0016	0.499968	0.28428
0.72744	26.7	25.0005	0.49999	0.28381
0.72748	25.26	24.9994	0.500011	0.283339
0.72752	25.79	24.9984	0.500032	0.282866
0.72756	26.22	24.9974	0.500053	0.282391
0.7276	24.78	24.9964	0.500073	0.281916
0.72764	27.08	24.9954	0.500092	0.281438
0.72768	23.49	24.9944	0.500111	0.28096
0.72772	27.46	24.9935	0.50013	0.280481
0.72776	22.68	24.9926	0.500148	0.28
0.7278	27.37	24.9917	0.500166	0.279519
0.72784	22.2	24.9909	0.500183	0.279038
0.72788	27.08	24.99	0.5002	0.278555
0.72792	21.81	24.9892	0.500216	0.278073
0.72796	26.84	24.9884	0.500231	0.27759
0.728	21.96	24.9877	0.500247	0.277106
0.72804	26.31	24.9869	0.500261	0.276623
0.72808	21.67	24.9862	0.500276	0.276139
0.72812	26.7	24.9855	0.500289	0.275655
0.72816	22.15	24.9849	0.500303	0.275171
0.7282	26.46	24.9842	0.500315	0.274687
0.72824	23.11	24.9836	0.500328	0.274203
0.72828	26.31	24.983	0.50034	0.273719
0.72832	23.3	24.9824	0.500352	0.273235
0.72836	26.84	24.9818	0.500364	0.272751
0.7284	23.39	24.9812	0.500375	0.272267
0.72844	26.94	24.9807	0.500387	0.271782
0.72848	24.59	24.9801	0.500398	0.271298
0.72852	26.84	24.9795	0.500409	0.270815
0.72856	25.17	24.979	0.50042	0.270331
0.7286	26.03	24.9784	0.500432	0.269848
0.72864	26.55	24.9779	0.500443	0.269365
0.72868	24.88	24.9773	0.500454	0.268882
0.72872	26.98	24.9767	0.500465	0.268399
0.72876	24.3	24.9762	0.500477	0.267917
0.7288	27.18	24.9756	0.500488	0.267436
0.72884	22.92	24.975	0.500499	0.266954
0.72888	27.37	24.9745	0.50051	0.266473
0.72892	22.1	24.9739	0.500522	0.265993
0.72896	27.32	24.9734	0.500533	0.265512
0.729	21.58	24.9728	0.500544	0.265032
0.72904	26.84	24.9723	0.500555	0.264552
0.72908	22.25	24.9717	0.500566	0.264072
0.72912	26.51	24.9712	0.500577	0.263592
0.72916	22.15	24.9706	0.500587	0.263112
0.7292	26.27	24.9701	0.500598	0.262633
0.72924	22.1	24.9696	0.500609	0.262153
0.72928	26.31	24.969	0.500619	0.261673
0.72932	22.72	24.9685	0.50063	0.261193
0.72936	26.55	24.968	0.50064	0.260713
0.7294	23.11	24.9675	0.500651	0.260232
0.72944	26.6	24.9669	0.500661	0.259752
0.72948	23.44	24.9664	0.500672	0.259272
0.72952	27.22	24.9659	0.500683	0.258792
0.72956	24.45	24.9653	0.500693	0.258311
0.7296	26.46	24.9648	0.500704	0.257831
0.72964	25.02	24.9642	0.500716	0.257351
0.72968	26.22	24.9636	0.500727	0.256872
0.72972	25.69	24.9631	0.500739	0.256392
0.72976	25.21	24.9625	0.500751	0.255913
0.7298	27.18	24.9619	0.500763	0.255434
0.72984	24.11	24.9612	0.500775	0.254955
0.72988	27.61	24.9606	0.500788	0.254477
0.72992	22.82	24.96	0.500801	0.253999
0.72996	27.51	24.9593	0.500814	0.253521
0.73	22.1	24.9587	0.500827	0.253044
0.73004	27.08	24.958	0.50084	0.252567
0.73008	21.86	24.9574	0.500853	0.25209
0.73012	27.08	24.9567	0.500866	0.251613
0.73016	21.81	24.956	0.50088	0.251136
0.7302	26.36	24.9554	0.500893	0.250659
0.73024	21.96	24.9547	0.500906	0.250183
0.73028	26.55	24.954	0.50092	0.249706
0.73032	22.01	24.9534	0.500933	0.24923
0.73036	26.27	24.9527	0.500946	0.248753
0.7304	22.87	24.952	0.50096	0.248277
0.73044	26.6	24.9513	0.500973	0.247801
0.73048	22.87	24.9507	0.500987	0.247325
0.73052	26.65	24.95	0.501	0.246849
0.73056	23.97	24.9493	0.501014	0.246373
0.7306	27.27	24.9486	0.501028	0.245897
0.73064	24.26	24.9479	0.501042	0.245422
0.73068	27.03	24.9472	0.501056	0.244947
0.73072	25.02	24.9465	0.501071	0.244472
0.73076	26.31	24.9457	0.501085	0.243997
0.7308	25.79	24.945	0.5011	0.243523
0.73084	25.12	24.9443	0.501115	0.243048
0.73088	26.7	24.9435	0.50113	0.242574
0.73092	24.26	24.9427	0.501145	0.2421
0.73096	27.7	24.942	0.50116	0.241626
0.731	23.06	24.9412	0.501176	0.241152
0.73104	27.27	24.9404	0.501191	0.240677
0.73108	22.48	24.9397	0.501206	0.240203
0.73112	27.22	24.9389	0.501222	0.239728
0.73116	21.96	24.9382	0.501237	0.239253
0.7312	27.08	24.9374	0.501252	0.238777
0.73124	21.62	24.9367	0.501266	0.238301
0.73128	26.51	24.936	0.501281	0.237825
0.73132	22.05	24.9353	0.501295	0.237348
0.73136	26.07	24.9346	0.501309	0.236871
0.7314	22.53	24.9339	0.501322	0.236394
0.73144	26.36	24.9332	0.501335	0.235916
0.73148	22.72	24.9326	0.501348	0.235439
0.73152	26.46	24.932	0.501361	0.234961
0.73156	22.92	24.9314	0.501373	0.234482
0.7316	26.79	24.9308	0.501384	0.234004
0.73164	23.39	24.9302	0.501396	0.233526
0.73168	26.98	24.9297	0.501407	0.233047
0.73172	24.21	24.9291	0.501417	0.232569
0.73176	26.51	24.9286	0.501428	0.232091
0.7318	24.64	24.9281	0.501437	0.231613
0.73184	26.22	24.9277	0.501447	0.231136
0.73188	25.84	24.9272	0.501456	0.230658
0.73192	24.54	24.9268	0.501465	0.230181
0.73196	26.51	24.9264	0.501473	0.229704
0.732	23.73	24.926	0.501481	0.229227
0.73204	27.37	24.9256	0.501488	0.228751
0.73208	22.82	24.9253	0.501494	0.228275
0.73212	27.27	24.925	0.5015	0.227799
0.73216	22.2	24.9247	0.501505	0.227324
0.7322	27.08	24.9245	0.50151	0.226848
0.73224	21.86	24.9243	0.501514	0.226373
0.73228	26.89	24.9242	0.501517	0.225898
0.73232	21.24	24.924	0.501519	0.225424
0.73236	26.36	24.924	0.501521	0.224949
				0.224475
