# Supplementary material for: Shear Thickening Fluids in Cork Agglomerates: An Exploration of Advantages and Drawbacks
Source: Preprints.org preprint supplement (doi:10.20944/preprints202304.0004.v1), 2023-04-03
Supplement: Supplementary file 12 [file EN_y_20.xlsx]

## Sheet: data
Time - Voltage - Voltage	Amplitude - Voltage - Voltage
0	561.6
4e-05	558.2
8e-05	561.3
0.00012	558.2
0.00016	561.7
0.0002	558.7
0.00024	561.8
0.00028	559.5
0.00032	562
0.00036	560.4
0.0004	560.7
0.00044	561.5
0.00048	560
0.00052	562.4
0.00056	558.7
0.0006	562.9
0.00064	557.2
0.00068	563.3
0.00072	555.9
0.00076	563.7
0.0008	554.7
0.00084	563.3
0.00088	554.8
0.00092	562.1
0.00096	555.6
0.001	561.8
0.00104	556.2
0.00108	561.3
0.00112	557
0.00116	561.5
0.0012	557.9
0.00124	561.8
0.00128	558.3
0.00132	561.6
0.00136	559
0.0014	562
0.00144	559.7
0.00148	562.2
0.00152	560.4
0.00156	561.5
0.0016	561.5
0.00164	559.7
0.00168	562.9
0.00172	558.1
0.00176	563.3
0.0018	557
0.00184	563.4
0.00188	555.5
0.00192	564
0.00196	555
0.002	563
0.00204	555.2
0.00208	561.8
0.00212	555.7
0.00216	561.6
0.0022	556.5
0.00224	561.2
0.00228	557.5
0.00232	561.3
0.00236	558
0.0024	561.4
0.00244	558.6
0.00248	561.5
0.00252	559.3
0.00256	562.6
0.0026	560.4
0.00264	561.6
0.00268	560.4
0.00272	560.8
0.00276	561.5
0.0028	559.3
0.00284	563.3
0.00288	557.5
0.00292	563.8
0.00296	555.6
0.003	563.9
0.00304	556
0.00308	563.5
0.00312	554.9
0.00316	562.4
0.0032	555.9
0.00324	562.3
0.00328	556
0.00332	561.6
0.00336	557.3
0.0034	561.2
0.00344	557.7
0.00348	561.7
0.00352	558.2
0.00356	561.8
0.0036	558.5
0.00364	561.9
0.00368	559.5
0.00372	561.9
0.00376	560
0.0038	561.3
0.00384	561.4
0.00388	560.5
0.00392	562.2
0.00396	559.1
0.004	563.4
0.00404	557.4
0.00408	563.8
0.00412	556.3
0.00416	563.5
0.0042	554.9
0.00424	563.6
0.00428	555.5
0.00432	562.4
0.00436	554.8
0.0044	562.1
0.00444	556.2
0.00448	561.5
0.00452	556.8
0.00456	561.1
0.0046	557.6
0.00464	561.7
0.00468	558.6
0.00472	561.9
0.00476	558.9
0.0048	561.9
0.00484	559.5
0.00488	562.2
0.00492	560.1
0.00496	561.6
0.005	561.4
0.00504	560
0.00508	562.5
0.00512	558.8
0.00516	563.3
0.0052	557.1
0.00524	563.3
0.00528	555.9
0.00532	563.8
0.00536	555.5
0.0054	563.2
0.00544	554.6
0.00548	562.2
0.00552	555.6
0.00556	561.8
0.0056	556.4
0.00564	561.8
0.00568	557.1
0.00572	561.4
0.00576	558
0.0058	561.8
0.00584	558.4
0.00588	561.8
0.00592	558.9
0.00596	562.5
0.006	560
0.00604	561.7
0.00608	560.1
0.00612	561.1
0.00616	561.5
0.0062	560.1
0.00624	562.8
0.00628	558.1
0.00632	563.4
0.00636	557.2
0.0064	564.2
0.00644	555.8
0.00648	563
0.00652	555.4
0.00656	563
0.0066	555.1
0.00664	562.1
0.00668	555.9
0.00672	561.6
0.00676	556.5
0.0068	561.5
0.00684	557.4
0.00688	561.1
0.00692	557.8
0.00696	561.6
0.007	558.6
0.00704	562.2
0.00708	559
0.00712	562.3
0.00716	559.7
0.0072	562
0.00724	560.9
0.00728	560.8
0.00732	561.9
0.00736	559.5
0.0074	562.6
0.00744	558.4
0.00748	563.5
0.00752	556.7
0.00756	563.6
0.0076	555.5
0.00764	563.3
0.00768	555
0.00772	562.4
0.00776	555.3
0.0078	561.8
0.00784	555.6
0.00788	562
0.00792	556.5
0.00796	561.4
0.008	557.6
0.00804	561.5
0.00808	558
0.00812	561.9
0.00816	558.3
0.0082	562.2
0.00824	559.1
0.00828	562.3
0.00832	559.5
0.00836	561.9
0.0084	560.9
0.00844	560.4
0.00848	561.9
0.00852	559.2
0.00856	563.4
0.0086	557.8
0.00864	563.4
0.00868	556.2
0.00872	563.7
0.00876	555.6
0.0088	563.2
0.00884	554.8
0.00888	562.8
0.00892	555.2
0.00896	562
0.009	555.4
0.00904	560.8
0.00908	556.1
0.00912	561.5
0.00916	557.7
0.0092	561.5
0.00924	558
0.00928	561.2
0.00932	559.1
0.00936	562.1
0.0094	559.3
0.00944	562.2
0.00948	560.3
0.00952	561
0.00956	561
0.0096	560.8
0.00964	562
0.00968	558.9
0.00972	562.8
0.00976	557.4
0.0098	563.8
0.00984	556.2
0.00988	563.6
0.00992	554.9
0.00996	562.9
0.01	555.6
0.01004	562.3
0.01008	555.5
0.01012	561.8
0.01016	555.5
0.0102	561.3
0.01024	556.7
0.01028	560.7
0.01032	557.7
0.01036	561.2
0.0104	558.2
0.01044	561.7
0.01048	558.6
0.01052	562.1
0.01056	559.2
0.0106	561.7
0.01064	560.2
0.01068	561
0.01072	560.9
0.01076	560
0.0108	562.2
0.01084	559
0.01088	563.1
0.01092	557.3
0.01096	563.3
0.011	556
0.01104	563.9
0.01108	555
0.01112	563
0.01116	555.3
0.0112	562.4
0.01124	555
0.01128	562
0.01132	556
0.01136	561.4
0.0114	556.8
0.01144	561.1
0.01148	557.7
0.01152	561.5
0.01156	558.2
0.0116	561.7
0.01164	558.5
0.01168	561.7
0.01172	559.4
0.01176	562.3
0.0118	559.7
0.01184	561.4
0.01188	561.2
0.01192	560.1
0.01196	562.5
0.012	558.4
0.01204	563.3
0.01208	556.5
0.01212	563.8
0.01216	556
0.0122	563.4
0.01224	555.6
0.01228	562.5
0.01232	554.9
0.01236	562.3
0.0124	555.5
0.01244	561.4
0.01248	556.2
0.01252	561.6
0.01256	556.9
0.0126	561.4
0.01264	557.5
0.01268	561.5
0.01272	558.5
0.01276	561.6
0.0128	558.9
0.01284	561.5
0.01288	559.7
0.01292	561.3
0.01296	560.3
0.013	561.3
0.01304	561.2
0.01308	560.2
0.01312	562.3
0.01316	558.4
0.0132	563
0.01324	556.8
0.01328	563.7
0.01332	555.3
0.01336	563.5
0.0134	555
0.01344	563.1
0.01348	554.8
0.01352	561.7
0.01356	555
0.0136	561.6
0.01364	556.2
0.01368	561.4
0.01372	556.6
0.01376	560.9
0.0138	557.9
0.01384	561.3
0.01388	558.6
0.01392	561.9
0.01396	558.9
0.014	561.8
0.01404	559.4
0.01408	561.6
0.01412	560.5
0.01416	560.7
0.0142	561.3
0.01424	559.5
0.01428	562.5
0.01432	558.1
0.01436	563.3
0.0144	556.6
0.01444	563.7
0.01448	555.6
0.01452	563.5
0.01456	554.7
0.0146	562.6
0.01464	554.9
0.01468	562
0.01472	555.7
0.01476	561.5
0.0148	556.2
0.01484	560.9
0.01488	557
0.01492	561.3
0.01496	558
0.015	561.5
0.01504	558.4
0.01508	561.9
0.01512	558.7
0.01516	562.1
0.0152	559.3
0.01524	561.8
0.01528	560.4
0.01532	560.7
0.01536	561.6
0.0154	559.4
0.01544	562.4
0.01548	557.8
0.01552	563.7
0.01556	556.5
0.0156	563.8
0.01564	555.4
0.01568	563
0.01572	554.9
0.01576	562.8
0.0158	554.6
0.01584	561.5
0.01588	555.6
0.01592	561.8
0.01596	555.9
0.016	561.1
0.01604	557.2
0.01608	560.4
0.01612	558
0.01616	561.4
0.0162	558.4
0.01624	561.7
0.01628	558.7
0.01632	562.6
0.01636	560
0.0164	561.8
0.01644	560.4
0.01648	560.1
0.01652	562
0.01656	559.2
0.0166	562.7
0.01664	558.2
0.01668	563.3
0.01672	556
0.01676	564
0.0168	555.5
0.01684	563.9
0.01688	554.5
0.01692	562.5
0.01696	555.1
0.017	561.7
0.01704	556.2
0.01708	561.4
0.01712	556.7
0.01716	561.3
0.0172	557.1
0.01724	561.5
0.01728	558.1
0.01732	561.9
0.01736	558.4
0.0174	561.6
0.01744	559.3
0.01748	562.4
0.01752	559.9
0.01756	561.4
0.0176	560.8
0.01764	560.2
0.01768	562.4
0.01772	559.1
0.01776	562.9
0.0178	557.1
0.01784	563.7
0.01788	555.8
0.01792	563.4
0.01796	555.2
0.018	563.3
0.01804	555
0.01808	562
0.01812	555.4
0.01816	561.6
0.0182	556
0.01824	561.4
0.01828	556.9
0.01832	561.1
0.01836	557.6
0.0184	561.1
0.01844	558.5
0.01848	561.8
0.01852	559
0.01856	562.3
0.0186	559.2
0.01864	561.8
0.01868	560.3
0.01872	561
0.01876	561.4
0.0188	560.3
0.01884	561.9
0.01888	558.5
0.01892	563.8
0.01896	556.8
0.019	564.1
0.01904	554.9
0.01908	563.4
0.01912	555.6
0.01916	562.6
0.0192	555.2
0.01924	561.7
0.01928	555.8
0.01932	561.2
0.01936	556.7
0.0194	562
0.01944	557.3
0.01948	561
0.01952	558
0.01956	561.6
0.0196	559
0.01964	562
0.01968	559.2
0.01972	562.1
0.01976	560
0.0198	561.4
0.01984	560.8
0.01988	560.6
0.01992	561.9
0.01996	559.6
0.02	563.1
0.02004	558
0.02008	563.6
0.02012	556.4
0.02016	563.8
0.0202	555.4
0.02024	563.1
0.02028	554.8
0.02032	562.9
0.02036	554.8
0.0204	561.9
0.02044	555.4
0.02048	561.8
0.02052	556.6
0.02056	560.8
0.0206	557.6
0.02064	561.4
0.02068	558.3
0.02072	561.7
0.02076	558.6
0.0208	562.4
0.02084	558.9
0.02088	562.2
0.02092	560.1
0.02096	561.4
0.021	561.1
0.02104	560.8
0.02108	562.2
0.02112	559
0.02116	563
0.0212	557.6
0.02124	563.6
0.02128	556.2
0.02132	563.7
0.02136	555.3
0.0214	563.1
0.02144	555.2
0.02148	562.6
0.02152	554.9
0.02156	562.1
0.0216	555.7
0.02164	561.3
0.02168	556.7
0.02172	561.3
0.02176	557.7
0.0218	561.5
0.02184	558.1
0.02188	561.5
0.02192	558.8
0.02196	562.1
0.022	559.2
0.02204	562
0.02208	559.8
0.02212	561.6
0.02216	561.4
0.0222	560.7
0.02224	562.2
0.02228	558.4
0.02232	563.2
0.02236	558
0.0224	563.8
0.02244	555.9
0.02248	563.8
0.02252	555
0.02256	563.3
0.0226	554.7
0.02264	562.4
0.02268	555.8
0.02272	561.7
0.02276	556
0.0228	561.1
0.02284	556.6
0.02288	561.5
0.02292	557.5
0.02296	561.3
0.023	558.4
0.02304	561.8
0.02308	559
0.02312	561.8
0.02316	559.9
0.0232	562.2
0.02324	560.7
0.02328	561.1
0.02332	561.1
0.02336	560.8
0.0234	562.4
0.02344	558.4
0.02348	563.5
0.02352	557.2
0.02356	564.2
0.0236	556.2
0.02364	563.5
0.02368	554.9
0.02372	563.2
0.02376	554.9
0.0238	562.6
0.02384	555.8
0.02388	561.9
0.02392	556
0.02396	561.3
0.024	557.7
0.02404	561.5
0.02408	558.1
0.02412	561.3
0.02416	558.4
0.0242	562.1
0.02424	559.1
0.02428	562.2
0.02432	559.7
0.02436	562.2
0.0244	560.5
0.02444	561.1
0.02448	561.8
0.02452	559.7
0.02456	562.9
0.0246	558.1
0.02464	563.5
0.02468	556.8
0.02472	563.6
0.02476	555.9
0.0248	563.6
0.02484	555.3
0.02488	562.6
0.02492	554.8
0.02496	562.6
0.025	555.9
0.02504	561.5
0.02508	556
0.02512	561.2
0.02516	557.5
0.0252	561.6
0.02524	558.4
0.02528	561.5
0.02532	558.8
0.02536	561.7
0.0254	559.1
0.02544	562.3
0.02548	560.1
0.02552	562.4
0.02556	560.9
0.0256	560.7
0.02564	561.7
0.02568	559.3
0.02572	563.4
0.02576	557.9
0.0258	563.6
0.02584	556.2
0.02588	563.6
0.02592	555.8
0.02596	563.6
0.026	555.4
0.02604	562.5
0.02608	554.5
0.02612	562.2
0.02616	556.2
0.0262	561.3
0.02624	557.2
0.02628	561.2
0.02632	557.8
0.02636	561.9
0.0264	558.2
0.02644	561.9
0.02648	558.8
0.02652	562.1
0.02656	559.5
0.0266	562.1
0.02664	560.3
0.02668	561.1
0.02672	561.5
0.02676	560.2
0.0268	562.4
0.02684	558.9
0.02688	563.4
0.02692	557
0.02696	563.7
0.027	556
0.02704	563.4
0.02708	555.4
0.02712	562.7
0.02716	554.7
0.0272	562.9
0.02724	555.2
0.02728	561.5
0.02732	555.9
0.02736	561.1
0.0274	557.4
0.02744	561.1
0.02748	557.8
0.02752	561.4
0.02756	558.2
0.0276	562.3
0.02764	559.2
0.02768	562.2
0.02772	559.4
0.02776	561.9
0.0278	560.2
0.02784	561.3
0.02788	561.4
0.02792	559.7
0.02796	562.8
0.028	558
0.02804	563.3
0.02808	557
0.02812	563.6
0.02816	555.9
0.0282	563.5
0.02824	555.3
0.02828	563
0.02832	554.7
0.02836	562.2
0.0284	555.6
0.02844	561.4
0.02848	556.2
0.02852	561.4
0.02856	557.1
0.0286	561.6
0.02864	558
0.02868	561.4
0.02872	558.7
0.02876	562.2
0.0288	558.9
0.02884	561.5
0.02888	559.6
0.02892	561.7
0.02896	560.6
0.029	560.9
0.02904	561.5
0.02908	559.2
0.02912	563
0.02916	557.7
0.0292	563.4
0.02924	556.5
0.02928	563.4
0.02932	555.5
0.02936	563.1
0.0294	555.1
0.02944	562.1
0.02948	554.5
0.02952	562.4
0.02956	555.6
0.0296	561.5
0.02964	556.8
0.02968	561.1
0.02972	557.3
0.02976	561.3
0.0298	558.2
0.02984	561.5
0.02988	558.5
0.02992	561.6
0.02996	559.7
0.03	562
0.03004	559.9
0.03008	560.4
0.03012	561.2
0.03016	560.1
0.0302	562.1
0.03024	558.8
0.03028	562.9
0.03032	557.6
0.03036	563.3
0.0304	556.2
0.03044	563.5
0.03048	554.9
0.03052	563.4
0.03056	554.7
0.0306	562.6
0.03064	555.2
0.03068	561.3
0.03072	556.3
0.03076	561.2
0.0308	556.9
0.03084	561
0.03088	557.6
0.03092	561.4
0.03096	558
0.031	561.6
0.03104	558.7
0.03108	562
0.03112	559.4
0.03116	561.8
0.0312	560.2
0.03124	561.2
0.03128	561.3
0.03132	559.9
0.03136	562.5
0.0314	558.1
0.03144	563.3
0.03148	556.9
0.03152	563.4
0.03156	555.7
0.0316	563.1
0.03164	555
0.03168	562.8
0.03172	554.9
0.03176	561.9
0.0318	555.2
0.03184	561.8
0.03188	556.2
0.03192	561.4
0.03196	557.3
0.032	561.1
0.03204	558
0.03208	561.7
0.03212	558.3
0.03216	561.5
0.0322	559.1
0.03224	562
0.03228	559.8
0.03232	561.8
0.03236	560.8
0.0324	561
0.03244	561.6
0.03248	559.2
0.03252	562.8
0.03256	557.8
0.0326	563.3
0.03264	556.1
0.03268	563.3
0.03272	555.4
0.03276	563.3
0.0328	554.4
0.03284	562.4
0.03288	555.1
0.03292	561.5
0.03296	555.4
0.033	561.5
0.03304	556.7
0.03308	560.1
0.03312	557
0.03316	561.5
0.0332	558.3
0.03324	561.5
0.03328	558
0.03332	561.8
0.03336	559.4
0.0334	562.1
0.03344	559.9
0.03348	560.9
0.03352	560.7
0.03356	560
0.0336	561.8
0.03364	559.1
0.03368	562.8
0.03372	557.3
0.03376	563.2
0.0338	556.3
0.03384	563.3
0.03388	555.4
0.03392	562.9
0.03396	554.4
0.034	562.4
0.03404	555.3
0.03408	561.6
0.03412	555.9
0.03416	561.2
0.0342	556.7
0.03424	561.3
0.03428	557.6
0.03432	560.9
0.03436	557.8
0.0344	561.5
0.03444	558.9
0.03448	562.1
0.03452	559.1
0.03456	561.7
0.0346	560
0.03464	561.3
0.03468	561.1
0.03472	560.1
0.03476	561.9
0.0348	558.4
0.03484	563.3
0.03488	557.1
0.03492	563.9
0.03496	555.6
0.035	563.3
0.03504	554.9
0.03508	563
0.03512	555.2
0.03516	562.1
0.0352	555.2
0.03524	561.5
0.03528	556.2
0.03532	561.1
0.03536	556.7
0.0354	561.2
0.03544	557.8
0.03548	561.2
0.03552	558.2
0.03556	561.7
0.0356	558.6
0.03564	562.2
0.03568	559.5
0.03572	561.3
0.03576	560.4
0.0358	561
0.03584	560.9
0.03588	559.8
0.03592	562.8
0.03596	558
0.036	563.2
0.03604	556.2
0.03608	563.6
0.03612	555.8
0.03616	563.3
0.0362	555
0.03624	562.6
0.03628	554.9
0.03632	561.6
0.03636	555.6
0.0364	561.1
0.03644	556.3
0.03648	561.3
0.03652	557.5
0.03656	561.4
0.0366	557.9
0.03664	561.7
0.03668	558.2
0.03672	561.9
0.03676	559.3
0.0368	561.9
0.03684	559.8
0.03688	561.8
0.03692	560.4
0.03696	560.6
0.037	562.3
0.03704	558.7
0.03708	563
0.03712	556.8
0.03716	563.8
0.0372	556.5
0.03724	563.2
0.03728	555.2
0.03732	563
0.03736	555.2
0.0374	562.6
0.03744	555.1
0.03748	561.7
0.03752	555.9
0.03756	561.5
0.0376	556.6
0.03764	560.9
0.03768	557.8
0.03772	561.2
0.03776	558.5
0.0378	561.7
0.03784	558.7
0.03788	562.1
0.03792	559.5
0.03796	561.9
0.038	560.3
0.03804	561.1
0.03808	561.2
0.03812	559.7
0.03816	562.6
0.0382	558.2
0.03824	563.6
0.03828	556.9
0.03832	563.7
0.03836	555.6
0.0384	563.4
0.03844	555.4
0.03848	562.7
0.03852	555.2
0.03856	562.2
0.0386	555.5
0.03864	561.5
0.03868	556.5
0.03872	561.2
0.03876	557.3
0.0388	561.5
0.03884	557.8
0.03888	561.4
0.03892	559
0.03896	561.5
0.039	559.1
0.03904	562.1
0.03908	559.7
0.03912	562.2
0.03916	560.6
0.0392	560.8
0.03924	561.6
0.03928	559.5
0.03932	562.7
0.03936	557.6
0.0394	563.7
0.03944	556.4
0.03948	563.3
0.03952	557
0.03956	563.9
0.0396	555.2
0.03964	562.9
0.03968	554.6
0.03972	561.7
0.03976	556
0.0398	561.4
0.03984	556.2
0.03988	560.9
0.03992	557.7
0.03996	560.8
0.04	558.1
0.04004	561.6
0.04008	558.3
0.04012	561.9
0.04016	559.1
0.0402	562.7
0.04024	560.4
0.04028	561.2
0.04032	560.7
0.04036	560.6
0.0404	562.2
0.04044	559.1
0.04048	562.9
0.04052	557.5
0.04056	563.6
0.0406	556.1
0.04064	563.8
0.04068	555.2
0.04072	563.2
0.04076	555
0.0408	562.4
0.04084	555.5
0.04088	561.9
0.04092	556
0.04096	561.4
0.041	556.6
0.04104	561.1
0.04108	558
0.04112	561.3
0.04116	558.5
0.0412	561.6
0.04124	559
0.04128	562.2
0.04132	559.1
0.04136	561.9
0.0414	560.4
0.04144	561.5
0.04148	561.1
0.04152	560.2
0.04156	562.4
0.0416	558.6
0.04164	563.3
0.04168	556.8
0.04172	564.1
0.04176	555.4
0.0418	563.5
0.04184	554.9
0.04188	563.3
0.04192	555.1
0.04196	561.6
0.042	555.5
0.04204	561.5
0.04208	556.4
0.04212	561.4
0.04216	557.3
0.0422	561.3
0.04224	557.7
0.04228	561.8
0.04232	558.6
0.04236	561.5
0.0424	559.2
0.04244	561.7
0.04248	559.8
0.04252	562.1
0.04256	560.5
0.0426	560.3
0.04264	561.5
0.04268	559.8
0.04272	563.1
0.04276	558
0.0428	564.1
0.04284	555.6
0.04288	563.2
0.04292	556.2
0.04296	563.6
0.043	555.2
0.04304	562.3
0.04308	555.2
0.04312	561.8
0.04316	556.2
0.0432	561.8
0.04324	557
0.04328	561.1
0.04332	558
0.04336	561.2
0.0434	558.8
0.04344	562.1
0.04348	558.7
0.04352	562
0.04356	559.4
0.0436	562.5
0.04364	560
0.04368	561.5
0.04372	561.2
0.04376	560.4
0.0438	562.4
0.04384	558.7
0.04388	563.3
0.04392	557.4
0.04396	563.8
0.044	556.2
0.04404	563.4
0.04408	555.2
0.04412	563
0.04416	555.2
0.0442	562.5
0.04424	555.4
0.04428	561.7
0.04432	556.3
0.04436	561.7
0.0444	557.4
0.04444	561.5
0.04448	557.6
0.04452	561.6
0.04456	558.6
0.0446	561.8
0.04464	559.2
0.04468	562.3
0.04472	559.5
0.04476	562.1
0.0448	560.5
0.04484	561.5
0.04488	561.4
0.04492	559.9
0.04496	562.7
0.045	558.2
0.04504	563.3
0.04508	556.8
0.04512	563.9
0.04516	555.8
0.0452	563.7
0.04524	555.2
0.04528	562.9
0.04532	555.2
0.04536	562.1
0.0454	555.8
0.04544	561.6
0.04548	556.7
0.04552	561.5
0.04556	557.5
0.0456	561.4
0.04564	557.8
0.04568	561.7
0.04572	558.5
0.04576	562.3
0.0458	559.4
0.04584	562.1
0.04588	559.9
0.04592	561.7
0.04596	561.1
0.046	560.9
0.04604	562.3
0.04608	559.7
0.04612	562.8
0.04616	558.1
0.0462	563.7
0.04624	556.3
0.04628	563.5
0.04632	555.8
0.04636	563.2
0.0464	555.1
0.04644	562.5
0.04648	555
0.04652	562.3
0.04656	555.6
0.0466	561.4
0.04664	556.7
0.04668	561.3
0.04672	557.3
0.04676	561.2
0.0468	558.3
0.04684	562
0.04688	558.3
0.04692	561.8
0.04696	559.5
0.047	562.1
0.04704	559.4
0.04708	561.7
0.04712	560.9
0.04716	560.7
0.0472	562.2
0.04724	558.6
0.04728	563.5
0.04732	557.6
0.04736	563.4
0.0474	556.7
0.04744	563.6
0.04748	555.4
0.04752	563.4
0.04756	554.9
0.0476	562.6
0.04764	555.2
0.04768	561.8
0.04772	556
0.04776	561.5
0.0478	556.6
0.04784	561.2
0.04788	557.9
0.04792	561.1
0.04796	558.5
0.048	562.2
0.04804	558.6
0.04808	561.6
0.04812	559.1
0.04816	562.1
0.0482	559.9
0.04824	561.6
0.04828	560.8
0.04832	560.7
0.04836	562
0.0484	559.1
0.04844	563.3
0.04848	557.4
0.04852	563.5
0.04856	556.1
0.0486	563.5
0.04864	555.2
0.04868	563
0.04872	554.9
0.04876	562.5
0.0488	555.8
0.04884	561.5
0.04888	555.7
0.04892	561.5
0.04896	556.7
0.049	560.7
0.04904	557.6
0.04908	561.1
0.04912	558.5
0.04916	561.6
0.0492	558.7
0.04924	562.2
0.04928	559.7
0.04932	561.9
0.04936	560.4
0.0494	560.9
0.04944	561.4
0.04948	558.7
0.04952	562.6
0.04956	558.8
0.0496	563.2
0.04964	556.9
0.04968	563.6
0.04972	556.2
0.04976	563.6
0.0498	554.9
0.04984	562.6
0.04988	555
0.04992	562.4
0.04996	555.7
0.05	561.8
0.05004	556.3
0.05008	561
0.05012	557
0.05016	560.9
0.0502	558
0.05024	561.3
0.05028	558
0.05032	561.5
0.05036	558.9
0.0504	562.2
0.05044	559.1
0.05048	562.2
0.05052	560
0.05056	560.6
0.0506	561.4
0.05064	559.7
0.05068	562.5
0.05072	558
0.05076	563.4
0.0508	556.8
0.05084	563.7
0.05088	555.9
0.05092	563.2
0.05096	554.6
0.051	562.7
0.05104	555.1
0.05108	562.2
0.05112	555.4
0.05116	561.6
0.0512	556.2
0.05124	561.4
0.05128	557.3
0.05132	561.2
0.05136	557.6
0.0514	561.6
0.05144	558.3
0.05148	561.9
0.05152	559.1
0.05156	562
0.0516	559.7
0.05164	561.8
0.05168	560.4
0.05172	561.1
0.05176	561.2
0.0518	559.8
0.05184	562.5
0.05188	558.1
0.05192	563.3
0.05196	556.2
0.052	564.1
0.05204	555.2
0.05208	563.3
0.05212	554.7
0.05216	562.5
0.0522	555.1
0.05224	561.5
0.05228	555.7
0.05232	561.6
0.05236	556.2
0.0524	561
0.05244	557.6
0.05248	561.4
0.05252	557.7
0.05256	561.3
0.0526	558.4
0.05264	561.6
0.05268	559.1
0.05272	562.4
0.05276	559.9
0.0528	561.5
0.05284	560.3
0.05288	560.8
0.05292	562.1
0.05296	559.6
0.053	562.7
0.05304	558.3
0.05308	563.1
0.05312	556.1
0.05316	563.3
0.0532	555.7
0.05324	563.3
0.05328	554.6
0.05332	562.4
0.05336	554.5
0.0534	561.8
0.05344	555.5
0.05348	561.6
0.05352	556.5
0.05356	561
0.0536	557
0.05364	561.1
0.05368	557.6
0.05372	561.3
0.05376	558.3
0.0538	562
0.05384	558.7
0.05388	561.6
0.05392	559.2
0.05396	561.5
0.054	560.7
0.05404	560.6
0.05408	561.7
0.05412	558.9
0.05416	562.9
0.0542	557.4
0.05424	563.3
0.05428	556.2
0.05432	563.3
0.05436	555.4
0.0544	563.1
0.05444	555.1
0.05448	562.5
0.05452	554.8
0.05456	562
0.0546	555.6
0.05464	561.5
0.05468	556.4
0.05472	561.2
0.05476	557.2
0.0548	561.2
0.05484	558.3
0.05488	561.4
0.05492	558.7
0.05496	561.9
0.055	558.8
0.05504	561.8
0.05508	559.9
0.05512	561.5
0.05516	560.8
0.0552	560.5
0.05524	562.1
0.05528	559
0.05532	562.8
0.05536	557.3
0.0554	563.3
0.05544	555.9
0.05548	563.7
0.05552	555.2
0.05556	562.7
0.0556	554.7
0.05564	562.4
0.05568	555.4
0.05572	561.8
0.05576	556
0.0558	560.9
0.05584	556.7
0.05588	561.1
0.05592	557.5
0.05596	561.9
0.056	558
0.05604	561.5
0.05608	558.6
0.05612	561.9
0.05616	559.4
0.0562	561.8
0.05624	560
0.05628	561.2
0.05632	561.4
0.05636	559.3
0.0564	562.5
0.05644	558.1
0.05648	563.3
0.05652	556.4
0.05656	563.7
0.0566	555.5
0.05664	563.4
0.05668	554.7
0.05672	562.7
0.05676	555.3
0.0568	562.1
0.05684	555.3
0.05688	561.5
0.05692	556.4
0.05696	561
0.057	557.7
0.05704	561
0.05708	558
0.05712	561.2
0.05716	558.6
0.0572	562.1
0.05724	559
0.05728	561.8
0.05732	559.7
0.05736	561.7
0.0574	560.5
0.05744	560.7
0.05748	561.6
0.05752	559.3
0.05756	563
0.0576	557.5
0.05764	563.5
0.05768	556.3
0.05772	563.4
0.05776	555.1
0.0578	563.2
0.05784	555.1
0.05788	562.5
0.05792	555.1
0.05796	561.6
0.058	556.1
0.05804	561.5
0.05808	556.3
0.05812	561.3
0.05816	557.6
0.0582	561.3
0.05824	558.3
0.05828	561.8
0.05832	558.7
0.05836	562
0.0584	559.2
0.05844	562.1
0.05848	559.8
0.05852	561.5
0.05856	560.6
0.0586	560.3
0.05864	561.8
0.05868	558.8
0.05872	563.2
0.05876	557.1
0.0588	563.3
0.05884	556.2
0.05888	563.8
0.05892	554.9
0.05896	562.9
0.059	554.5
0.05904	562
0.05908	555.8
0.05912	561.4
0.05916	556.5
0.0592	560.3
0.05924	557
0.05928	561.1
0.05932	558
0.05936	561.6
0.0594	558
0.05944	561.7
0.05948	559.2
0.05952	562.1
0.05956	560
0.0596	561.7
0.05964	559.9
0.05968	561.2
0.05972	561.3
0.05976	560.3
0.0598	562.7
0.05984	558
0.05988	563.2
0.05992	557.1
0.05996	563.7
0.06	556.1
0.06004	563.1
0.06008	554.8
0.06012	562.8
0.06016	555.3
0.0602	562.2
0.06024	555.5
0.06028	561.5
0.06032	556.2
0.06036	561.3
0.0604	557.5
0.06044	561.1
0.06048	558.1
0.06052	561.1
0.06056	558.7
0.0606	561.7
0.06064	559.3
0.06068	562.2
0.06072	559.3
0.06076	561.9
0.0608	560.7
0.06084	561
0.06088	561.9
0.06092	559.1
0.06096	563.2
0.061	557.9
0.06104	563.6
0.06108	556.5
0.06112	563.6
0.06116	555.4
0.0612	563.3
0.06124	555
0.06128	562.7
0.06132	555.2
0.06136	562.1
0.0614	556.2
0.06144	561.3
0.06148	556.8
0.06152	561.2
0.06156	557.5
0.0616	561.7
0.06164	558.2
0.06168	561.5
0.06172	558.9
0.06176	562.3
0.0618	559.3
0.06184	562
0.06188	560.4
0.06192	561.4
0.06196	561.4
0.062	560.1
0.06204	562
0.06208	558.8
0.06212	563.3
0.06216	556.5
0.0622	563.5
0.06224	556
0.06228	563.7
0.06232	555.5
0.06236	563.2
0.0624	555.2
0.06244	563.1
0.06248	555.5
0.06252	562.2
0.06256	556.9
0.0626	561.2
0.06264	556.9
0.06268	561.3
0.06272	558.4
0.06276	561.4
0.0628	558.6
0.06284	562.4
0.06288	559.1
0.06292	562.6
0.06296	559.5
0.063	562
0.06304	560.7
0.06308	561
0.06312	561.8
0.06316	560
0.0632	562.9
0.06324	558
0.06328	563.6
0.06332	556.8
0.06336	563.4
0.0634	555.5
0.06344	563.5
0.06348	555.3
0.06352	562.9
0.06356	555
0.0636	562.5
0.06364	555.9
0.06368	561.9
0.06372	556.9
0.06376	561.5
0.0638	557.7
0.06384	561.1
0.06388	558.2
0.06392	561.7
0.06396	559.1
0.064	561.9
0.06404	559.5
0.06408	562.3
0.06412	559.9
0.06416	561.9
0.0642	560.7
0.06424	561
0.06428	562
0.06432	559.3
0.06436	563
0.0644	558
0.06444	563.4
0.06448	556.4
0.06452	563.5
0.06456	555.5
0.0646	563.4
0.06464	555.1
0.06468	562.6
0.06472	555.4
0.06476	561.9
0.0648	556.2
0.06484	561.6
0.06488	556.6
0.06492	561.2
0.06496	558
0.065	561.6
0.06504	558.3
0.06508	562.2
0.06512	559
0.06516	562.2
0.0652	559.2
0.06524	562
0.06528	561
0.06532	561.6
0.06536	560.9
0.0654	560.1
0.06544	562.2
0.06548	559.3
0.06552	563.2
0.06556	557.5
0.0656	563.8
0.06564	556.2
0.06568	563.3
0.06572	555.2
0.06576	563.7
0.0658	554.9
0.06584	562.6
0.06588	555.6
0.06592	562.1
0.06596	556.4
0.066	561.4
0.06604	557
0.06608	561.5
0.06612	557.8
0.06616	561.5
0.0662	558.5
0.06624	561.5
0.06628	558.9
0.06632	562.2
0.06636	559.9
0.0664	562
0.06644	560
0.06648	561.1
0.06652	561.9
0.06656	560.1
0.0666	562.8
0.06664	558.1
0.06668	563.3
0.06672	556.9
0.06676	563.7
0.0668	556.2
0.06684	563.6
0.06688	554.7
0.06692	562.7
0.06696	555.2
0.067	562.5
0.06704	555.6
0.06708	561.6
0.06712	556.6
0.06716	561.5
0.0672	557.9
0.06724	561.4
0.06728	558
0.06732	561.3
0.06736	558.4
0.0674	562.4
0.06744	559.1
0.06748	561.5
0.06752	559.8
0.06756	561.5
0.0676	560.6
0.06764	560.9
0.06768	561.6
0.06772	559.5
0.06776	562.8
0.0678	557.7
0.06784	563.9
0.06788	556.5
0.06792	563.3
0.06796	555.2
0.068	563.5
0.06804	554.9
0.06808	562.5
0.06812	554.7
0.06816	562.1
0.0682	555.9
0.06824	561.6
0.06828	556.8
0.06832	561.2
0.06836	557.4
0.0684	561.5
0.06844	558.6
0.06848	561.9
0.06852	558.9
0.06856	561.9
0.0686	559.3
0.06864	561.9
0.06868	560.4
0.06872	561.1
0.06876	561.1
0.0688	559.6
0.06884	562.4
0.06888	558.7
0.06892	563.2
0.06896	557
0.069	563
0.06904	555.9
0.06908	563.8
0.06912	555.5
0.06916	563
0.0692	554.6
0.06924	562.3
0.06928	555.3
0.06932	561.7
0.06936	556.2
0.0694	561.2
0.06944	557.1
0.06948	560.6
0.06952	557.8
0.06956	562
0.0696	558.2
0.06964	561.4
0.06968	558.9
0.06972	561.8
0.06976	560.4
0.0698	561.5
0.06984	560
0.06988	561
0.06992	561.5
0.06996	560.3
0.07	562.7
0.07004	558.6
0.07008	563.5
0.07012	556.4
0.07016	563.7
0.0702	555.7
0.07024	562.8
0.07028	555
0.07032	563
0.07036	555.1
0.0704	562.2
0.07044	555.3
0.07048	561.6
0.07052	556.2
0.07056	561.1
0.0706	556.8
0.07064	561.1
0.07068	557.9
0.07072	561.5
0.07076	558.5
0.0708	561.6
0.07084	559
0.07088	562.1
0.07092	559.4
0.07096	561.9
0.071	560.7
0.07104	560.7
0.07108	561.7
0.07112	559.3
0.07116	562.6
0.0712	558
0.07124	563.3
0.07128	556.8
0.07132	563.6
0.07136	555.2
0.0714	563.3
0.07144	554.8
0.07148	562.7
0.07152	555
0.07156	561.7
0.0716	555.8
0.07164	561.5
0.07168	556.2
0.07172	561.2
0.07176	557.4
0.0718	560.9
0.07184	558
0.07188	562
0.07192	558.7
0.07196	561.8
0.072	559.1
0.07204	562.1
0.07208	559.6
0.07212	561.9
0.07216	560.5
0.0722	560.7
0.07224	562.2
0.07228	558.9
0.07232	563.1
0.07236	557.6
0.0724	563.7
0.07244	556.2
0.07248	563.6
0.07252	555.9
0.07256	563.1
0.0726	554.8
0.07264	562.6
0.07268	554.8
0.07272	562
0.07276	555.3
0.0728	561.2
0.07284	556.5
0.07288	560.8
0.07292	557.5
0.07296	561.5
0.073	557.7
0.07304	561.7
0.07308	558.6
0.07312	562
0.07316	558.1
0.0732	562.2
0.07324	559.8
0.07328	561.2
0.07332	561.2
0.07336	559.6
0.0734	562.3
0.07344	558.3
0.07348	562.8
0.07352	557.3
0.07356	564.1
0.0736	556
0.07364	563.1
0.07368	554.9
0.07372	562.8
0.07376	554.6
0.0738	562.2
0.07384	555.1
0.07388	561.3
0.07392	555.8
0.07396	561.2
0.074	556.6
0.07404	561.4
0.07408	557.5
0.07412	561
0.07416	558.1
0.0742	561.6
0.07424	558.6
0.07428	561.8
0.07432	559.3
0.07436	561.9
0.0744	560
0.07444	561.2
0.07448	561.3
0.07452	559.7
0.07456	562.3
0.0746	558.4
0.07464	563.2
0.07468	556.9
0.07472	563.6
0.07476	555.9
0.0748	563.4
0.07484	554.7
0.07488	563
0.07492	554.8
0.07496	562.3
0.075	555.3
0.07504	561.4
0.07508	556.3
0.07512	561
0.07516	557.2
0.0752	561.5
0.07524	557.7
0.07528	561.5
0.07532	558
0.07536	562
0.0754	558.8
0.07544	562.1
0.07548	559.5
0.07552	561.5
0.07556	560.1
0.0756	561
0.07564	561.6
0.07568	559.6
0.07572	562.7
0.07576	557.9
0.0758	563.1
0.07584	556.5
0.07588	563.4
0.07592	555.2
0.07596	563.3
0.076	554.6
0.07604	562.6
0.07608	554.8
0.07612	562.2
0.07616	555.4
0.0762	561.5
0.07624	556.1
0.07628	561.1
0.07632	557.8
0.07636	561.5
0.0764	557.7
0.07644	561.6
0.07648	558.4
0.07652	562
0.07656	558.9
0.0766	562.4
0.07664	559.5
0.07668	561.7
0.07672	560.9
0.07676	560.7
0.0768	561.9
0.07684	559.3
0.07688	562.4
0.07692	557.8
0.07696	563.5
0.077	556.2
0.07704	563.5
0.07708	555.3
0.07712	563.1
0.07716	555.4
0.0772	562.7
0.07724	555.1
0.07728	562.1
0.07732	555.4
0.07736	561.4
0.0774	556.5
0.07744	561.2
0.07748	557.3
0.07752	561.4
0.07756	557.8
0.0776	561.5
0.07764	558.8
0.07768	561.9
0.07772	559.3
0.07776	562
0.0778	559.6
0.07784	561.5
0.07788	560.6
0.07792	560.9
0.07796	561.7
0.078	558.9
0.07804	563.3
0.07808	557.3
0.07812	563.5
0.07816	556.3
0.0782	563.6
0.07824	555.2
0.07828	563.3
0.07832	554.7
0.07836	562.9
0.0784	555.2
0.07844	561.5
0.07848	556
0.07852	561.2
0.07856	556.9
0.0786	561.2
0.07864	557.9
0.07868	561.2
0.07872	558.3
0.07876	561.9
0.0788	559.1
0.07884	562
0.07888	559.3
0.07892	562.1
0.07896	560.5
0.079	560.7
0.07904	561.4
0.07908	560.4
0.07912	562.4
0.07916	558.2
0.0792	563.2
0.07924	557.4
0.07928	563.5
0.07932	556.1
0.07936	564.1
0.0794	554.8
0.07944	562.7
0.07948	554.6
0.07952	562.4
0.07956	555.7
0.0796	561.5
0.07964	555.9
0.07968	561.2
0.07972	557.5
0.07976	560.6
0.0798	558
0.07984	561.2
0.07988	558.8
0.07992	561.7
[truncated: 98,001 more rows]

## Sheet: Sheet1
		100	50
time	data	butfilt1	Strain
0.549	37.08	35.4402	0.291196
0.54904	39.19	35.3827	0.292346
0.54908	35.36	35.3242	0.293515
0.54912	39.53	35.2648	0.294705
0.54916	34.6	35.2043	0.295913
0.5492	39.24	35.1429	0.297142
0.54924	33.16	35.0805	0.29839
0.54928	38.81	35.0172	0.299657
0.54932	33.49	34.9528	0.300943
0.54936	37.13	34.8875	0.302249
0.5494	32.73	34.8213	0.303574
0.54944	36.8	34.7541	0.304917
0.54948	33.16	34.686	0.30628
0.54952	37.04	34.617	0.307661
0.54956	32.39	34.547	0.30906
0.5496	36.65	34.4761	0.310478
0.54964	33.45	34.4043	0.311915
0.54968	36.89	34.3316	0.313369
0.54972	33.25	34.2579	0.314841
0.54976	36.99	34.1834	0.316331
0.5498	33.83	34.108	0.317839
0.54984	36.56	34.0318	0.319365
0.54988	34.07	33.9546	0.320907
0.54992	36.51	33.8767	0.322467
0.54996	34.55	33.7978	0.324044
0.55	35.07	33.7181	0.325637
0.55004	35.17	33.6376	0.327247
0.55008	33.88	33.5563	0.328873
0.55012	36.13	33.4742	0.330516
0.55016	32.58	33.3913	0.332174
0.5502	36.51	33.3076	0.333848
0.55024	31.29	33.2232	0.335537
0.55028	36.08	33.138	0.337241
0.55032	30.29	33.052	0.338959
0.55036	35.55	32.9654	0.340693
0.5504	30.1	32.878	0.34244
0.55044	34.74	32.7899	0.344201
0.55048	29.52	32.7012	0.345976
0.55052	34.6	32.6118	0.347765
0.55056	29.71	32.5217	0.349566
0.5506	33.78	32.431	0.35138
0.55064	30.19	32.3396	0.353207
0.55068	33.49	32.2477	0.355046
0.55072	30.67	32.1551	0.356898
0.55076	33.54	32.062	0.358761
0.5508	29.95	31.9682	0.360635
0.55084	33.83	31.8739	0.362521
0.55088	30.77	31.7791	0.364419
0.55092	34.02	31.6837	0.366326
0.55096	31.2	31.5878	0.368245
0.551	33.3	31.4913	0.370174
0.55104	31.58	31.3944	0.372113
0.55108	32.35	31.2969	0.374061
0.55112	32.49	31.199	0.376019
0.55116	30.81	31.1007	0.377987
0.5512	33.06	31.0018	0.379963
0.55124	29.19	30.9026	0.381948
0.55128	33.59	30.8029	0.383941
0.55132	28.32	30.7029	0.385943
0.55136	32.87	30.6024	0.387952
0.5514	27.18	30.5016	0.389968
0.55144	32.63	30.4004	0.391992
0.55148	27.18	30.2989	0.394022
0.55152	31.53	30.197	0.396059
0.55156	26.94	30.0949	0.398102
0.5516	31.1	29.9924	0.400151
0.55164	26.51	29.8897	0.402206
0.55168	30.72	29.7867	0.404266
0.55172	26.79	29.6834	0.406332
0.55176	30.38	29.5799	0.408402
0.5518	27.18	29.4762	0.410477
0.55184	31.01	29.3722	0.412556
0.55188	27.18	29.268	0.414639
0.55192	30.81	29.1637	0.416726
0.55196	27.32	29.0591	0.418817
0.552	30.48	28.9544	0.420912
0.55204	28.66	28.8495	0.42301
0.55208	30.19	28.7445	0.42511
0.55212	28.71	28.6393	0.427214
0.55216	29.43	28.534	0.42932
0.5522	29.33	28.4286	0.431429
0.55224	27.8	28.323	0.433539
0.55228	30.05	28.2174	0.435652
0.55232	26.07	28.1117	0.437766
0.55236	30.14	28.0059	0.439881
0.5524	25.31	27.9001	0.441997
0.55244	29.66	27.7943	0.444115
0.55248	24.26	27.6884	0.446232
0.55252	29.43	27.5825	0.44835
0.55256	23.73	27.4766	0.450468
0.5526	28.42	27.3707	0.452586
0.55264	23.73	27.2648	0.454704
0.55268	27.94	27.159	0.45682
0.55272	23.54	27.0532	0.458936
0.55276	27.42	26.9474	0.461051
0.5528	23.68	26.8418	0.463165
0.55284	27.65	26.7361	0.465277
0.55288	24.06	26.6306	0.467388
0.55292	27.61	26.5252	0.469497
0.55296	24.64	26.4198	0.471604
0.553	27.75	26.3145	0.473709
0.55304	24.73	26.2094	0.475812
0.55308	27.65	26.1044	0.477913
0.55312	25.55	25.9994	0.480011
0.55316	27.08	25.8947	0.482107
0.5532	25.79	25.79	0.4842
0.55324	25.84	25.6855	0.48629
0.55328	27.46	25.5812	0.488377
0.55332	24.16	25.477	0.490461
0.55336	27.46	25.3729	0.492541
0.5534	22.96	25.2691	0.494618
0.55344	27.42	25.1654	0.496691
0.55348	22.72	25.062	0.498761
0.55352	26.7	24.9587	0.500826
0.55356	21.62	24.8556	0.502887
0.5536	26.36	24.7528	0.504944
0.55364	20.81	24.6502	0.506996
0.55368	25.64	24.5478	0.509044
0.55372	20.67	24.4457	0.511087
0.55376	25.31	24.3438	0.513125
0.5538	21.14	24.2421	0.515158
0.55384	24.59	24.1407	0.517185
0.55388	21.05	24.0396	0.519208
0.55392	24.88	23.9387	0.521225
0.55396	21.48	23.8382	0.523237
0.554	25.21	23.7378	0.525243
0.55404	21.72	23.6378	0.527244
0.55408	25.17	23.538	0.529239
0.55412	22.15	23.4386	0.531229
0.55416	24.83	23.3394	0.533212
0.5542	23.15	23.2405	0.53519
0.55424	24.11	23.1419	0.537163
0.55428	23.49	23.0436	0.539129
0.55432	23.35	22.9455	0.541089
0.55436	24.35	22.8478	0.543043
0.5544	21.96	22.7504	0.544991
0.55444	24.64	22.6533	0.546933
0.55448	20.95	22.5566	0.548868
0.55452	25.12	22.4601	0.550797
0.55456	19.76	22.364	0.55272
0.5546	24.73	22.2682	0.554636
0.55464	18.8	22.1728	0.556545
0.55468	24.21	22.0777	0.558447
0.55472	18.42	21.9829	0.560342
0.55476	23.44	21.8885	0.562231
0.5548	18.7	21.7944	0.564112
0.55484	22.87	21.7007	0.565986
0.55488	18.75	21.6074	0.567852
0.55492	22.63	21.5144	0.569712
0.55496	18.94	21.4218	0.571564
0.555	22.58	21.3296	0.573408
0.55504	19.04	21.2377	0.575246
0.55508	22.72	21.1462	0.577075
0.55512	19.52	21.0551	0.578897
0.55516	22.96	20.9644	0.580712
0.5552	19.85	20.8741	0.582519
0.55524	22.77	20.7841	0.584318
0.55528	20.28	20.6945	0.58611
0.55532	21.77	20.6053	0.587894
0.55536	21.38	20.5165	0.58967
0.5554	21.05	20.4281	0.591438
0.55544	22.15	20.3401	0.593198
0.55548	19.61	20.2525	0.59495
0.55552	22.82	20.1653	0.596695
0.55556	18.32	20.0785	0.598431
0.5556	22.29	19.9921	0.600159
0.55564	17.22	19.9061	0.601878
0.55568	22.34	19.8205	0.603589
0.55572	16.45	19.7354	0.605292
0.55576	21.34	19.6507	0.606986
0.5558	16.5	19.5665	0.608671
0.55584	21.34	19.4826	0.610347
0.55588	16.21	19.3993	0.612015
0.55592	20.62	19.3163	0.613673
0.55596	16.84	19.2338	0.615323
0.556	20.52	19.1518	0.616964
0.55604	17.7	19.0702	0.618595
0.55608	20.47	18.9891	0.620217
0.55612	16.88	18.9085	0.621831
0.55616	20.43	18.8283	0.623434
0.5562	17.7	18.7486	0.625029
0.55624	20.57	18.6693	0.626614
0.55628	17.94	18.5905	0.62819
0.55632	20.76	18.5122	0.629756
0.55636	18.46	18.4344	0.631313
0.5564	19.42	18.357	0.63286
0.55644	18.99	18.2801	0.634397
0.55648	18.61	18.2038	0.635925
0.55652	20.47	18.1279	0.637442
0.55656	16.98	18.0525	0.63895
0.5566	20.62	17.9776	0.640448
0.55664	15.78	17.9032	0.641935
0.55668	20.47	17.8294	0.643413
0.55672	14.63	17.756	0.644879
0.55676	20.09	17.6832	0.646336
0.5568	13.82	17.6109	0.647781
0.55684	19.28	17.5392	0.649216
0.55688	14.01	17.468	0.65064
0.55692	18.32	17.3973	0.652054
0.55696	14.35	17.3272	0.653456
0.557	18.08	17.2577	0.654847
0.55704	14.59	17.1887	0.656227
0.55708	17.99	17.1202	0.657595
0.55712	14.73	17.0524	0.658952
0.55716	18.13	16.9851	0.660298
0.5572	14.97	16.9183	0.661633
0.55724	18.42	16.8522	0.662956
0.55728	15.54	16.7866	0.664268
0.55732	18.51	16.7216	0.665568
0.55736	16.07	16.6572	0.666857
0.5574	18.46	16.5933	0.668134
0.55744	16.6	16.53	0.669399
0.55748	17.17	16.4673	0.670653
0.55752	17.7	16.4052	0.671895
0.55756	15.93	16.3437	0.673125
0.5576	18.13	16.2828	0.674344
0.55764	14.63	16.2225	0.67555
0.55768	18.42	16.1628	0.676745
0.55772	13.82	16.1036	0.677927
0.55776	18.46	16.0451	0.679097
0.5578	12.77	15.9872	0.680255
0.55784	18.03	15.93	0.681401
0.55788	12.58	15.8733	0.682534
0.55792	17.41	15.8173	0.683655
0.55796	12.58	15.7619	0.684763
0.558	16.98	15.7071	0.685858
0.55804	12.58	15.653	0.686941
0.55808	16.36	15.5994	0.688011
0.55812	12.72	15.5466	0.689069
0.55816	16.65	15.4943	0.690113
0.5582	13.44	15.4428	0.691145
0.55824	16.65	15.3918	0.692164
0.55828	13.53	15.3415	0.69317
0.55832	16.88	15.2918	0.694164
0.55836	13.87	15.2428	0.695144
0.5584	17.51	15.1944	0.696112
0.55844	14.78	15.1467	0.697067
0.55848	16.55	15.0996	0.698009
0.55852	15.54	15.0531	0.698938
0.55856	15.35	15.0073	0.699854
0.5586	16.69	14.9621	0.700757
0.55864	14.25	14.9176	0.701647
0.55868	16.98	14.8738	0.702525
0.55872	12.58	14.8306	0.703389
0.55876	17.22	14.788	0.70424
0.5588	11.91	14.7461	0.705078
0.55884	17.03	14.7049	0.705902
0.55888	11.62	14.6643	0.706713
0.55892	16.6	14.6244	0.707511
0.55896	11	14.5852	0.708296
0.559	16.26	14.5467	0.709067
0.55904	11.14	14.5088	0.709825
0.55908	15.78	14.4716	0.710569
0.55912	11.24	14.435	0.711299
0.55916	15.16	14.3992	0.712017
0.5592	12.15	14.364	0.71272
0.55924	15.26	14.3295	0.71341
0.55928	12.58	14.2957	0.714087
0.55932	15.78	14.2625	0.71475
0.55936	11.95	14.23	0.7154
0.5594	16.12	14.1982	0.716036
0.55944	12.86	14.1671	0.716659
0.55948	15.88	14.1366	0.717268
0.55952	13.77	14.1068	0.717864
0.55956	15.11	14.0776	0.718447
0.5596	14.68	14.0492	0.719017
0.55964	14.01	14.0214	0.719573
0.55968	15.93	13.9942	0.720115
0.55972	12.96	13.9678	0.720645
0.55976	15.59	13.942	0.721161
0.5598	11.67	13.9168	0.721663
0.55984	16.07	13.8924	0.722152
0.55988	11	13.8686	0.722628
0.55992	15.69	13.8455	0.723091
0.55996	9.896	13.823	0.72354
0.56	15.21	13.8012	0.723975
0.56004	10.47	13.7801	0.724398
0.56008	14.78	13.7597	0.724807
0.56012	10.95	13.7399	0.725202
0.56016	15.16	13.7208	0.725585
0.5602	10.66	13.7023	0.725954
0.56024	14.44	13.6845	0.726309
0.56028	11.24	13.6674	0.726652
0.56032	15.02	13.6509	0.726981
0.56036	11.76	13.6351	0.727298
0.5604	15.16	13.6199	0.727602
0.56044	12.34	13.6054	0.727892
0.56048	15.16	13.5915	0.72817
0.56052	13.25	13.5782	0.728435
0.56056	15.07	13.5656	0.728688
0.5606	13.68	13.5536	0.728927
0.56064	14.63	13.5423	0.729155
0.56068	14.63	13.5315	0.72937
0.56072	13.49	13.5214	0.729572
0.56076	15.54	13.5119	0.729762
0.5608	12.1	13.503	0.729939
0.56084	15.83	13.4948	0.730105
0.56088	10.9	13.4871	0.730258
0.56092	16.07	13.4801	0.730398
0.56096	10.33	13.4737	0.730526
0.561	15.26	13.4679	0.730643
0.56104	9.992	13.4627	0.730746
0.56108	14.83	13.4581	0.730838
0.56112	10.57	13.4541	0.730918
0.56116	14.83	13.4507	0.730985
0.5612	10.18	13.448	0.731041
0.56124	14.63	13.4458	0.731084
0.56128	10.09	13.4442	0.731116
0.56132	14.35	13.4432	0.731136
0.56136	11.09	13.4428	0.731144
0.5614	14.83	13.443	0.73114
0.56144	11.62	13.4437	0.731125
0.56148	15.59	13.4451	0.731099
0.56152	12.19	13.447	0.731061
0.56156	15.45	13.4494	0.731012
0.5616	13.01	13.4524	0.730952
0.56164	15.02	13.456	0.73088
0.56168	13.87	13.4601	0.730798
0.56172	14.11	13.4647	0.730705
0.56176	14.68	13.4699	0.730602
0.5618	13.06	13.4756	0.730487
0.56184	15.59	13.4819	0.730362
0.56188	11.86	13.4887	0.730226
0.56192	16.12	13.496	0.73008
0.56196	11.09	13.5038	0.729923
0.562	15.74	13.5122	0.729756
0.56204	11.09	13.5211	0.729579
0.56208	15.26	13.5304	0.729391
0.56212	9.992	13.5403	0.729193
0.56216	15.11	13.5508	0.728985
0.5622	9.992	13.5617	0.728767
0.56224	14.68	13.5731	0.728538
0.56228	10.18	13.585	0.7283
0.56232	14.16	13.5974	0.728051
0.56236	11.43	13.6103	0.727793
0.5624	14.63	13.6237	0.727526
0.56244	11.91	13.6376	0.727248
0.56248	14.97	13.6519	0.726962
0.56252	11.91	13.6667	0.726666
0.56256	15.78	13.682	0.72636
0.5626	12.15	13.6977	0.726046
0.56264	15.54	13.7139	0.725723
0.56268	13.25	13.7305	0.725391
0.56272	15.02	13.7475	0.72505
0.56276	14.06	13.765	0.724701
0.5628	14.01	13.7829	0.724343
0.56284	15.59	13.8012	0.723977
0.56288	13.49	13.8199	0.723602
0.56292	16.36	13.839	0.72322
0.56296	12.38	13.8585	0.722829
0.563	16.55	13.8785	0.72243
0.56304	11.28	13.8988	0.722024
0.56308	16.6	13.9195	0.721609
0.56312	10.47	13.9407	0.721187
0.56316	15.69	13.9622	0.720757
0.5632	10.61	13.984	0.720319
0.56324	15.59	14.0063	0.719874
0.56328	11.62	14.0289	0.719422
0.56332	15.35	14.0519	0.718962
0.56336	11.19	14.0753	0.718494
0.5634	15.5	14.099	0.71802
0.56344	11.67	14.1231	0.717538
0.56348	15.64	14.1475	0.71705
0.56352	12.67	14.1723	0.716555
0.56356	16.17	14.1973	0.716053
0.5636	12.58	14.2228	0.715545
0.56364	16.36	14.2485	0.71503
0.56368	13.92	14.2746	0.714509
0.56372	16.36	14.3009	0.713982
0.56376	14.35	14.3276	0.713448
0.5638	15.83	14.3546	0.712909
0.56384	15.4	14.3818	0.712364
0.56388	14.68	14.4094	0.711813
0.56392	16.26	14.4372	0.711256
0.56396	13.39	14.4653	0.710694
0.564	17.32	14.4937	0.710126
0.56404	12.24	14.5224	0.709552
0.56408	17.36	14.5513	0.708973
0.56412	12	14.5806	0.708389
0.56416	16.79	14.6101	0.707799
0.5642	11.57	14.6398	0.707204
0.56424	16.55	14.6698	0.706604
0.56428	11.52	14.7001	0.705998
0.56432	16.12	14.7306	0.705388
0.56436	11.62	14.7614	0.704772
0.5644	16.12	14.7924	0.704151
0.56444	12.43	14.8237	0.703526
0.56448	16.26	14.8552	0.702895
0.56452	12.82	14.887	0.70226
0.56456	16.5	14.919	0.701621
0.5646	13.15	14.9512	0.700977
0.56464	16.55	14.9836	0.700328
0.56468	13.92	15.0162	0.699675
0.56472	17.32	15.0491	0.699018
0.56476	14.54	15.0821	0.698357
0.5648	17.17	15.1154	0.697692
0.56484	15.21	15.1488	0.697023
0.56488	16.5	15.1825	0.696351
0.56492	16.41	15.2163	0.695674
0.56496	15.69	15.2503	0.694994
0.565	17.36	15.2845	0.69431
0.56504	14.06	15.3189	0.693622
0.56508	18.13	15.3534	0.692931
0.56512	13.39	15.3882	0.692237
0.56516	18.08	15.4231	0.691539
0.5652	12.53	15.4581	0.690837
0.56524	17.75	15.4934	0.690132
0.56528	12.29	15.5288	0.689424
0.56532	17.08	15.5644	0.688712
0.56536	12.38	15.6001	0.687997
0.5654	17.27	15.636	0.687279
0.56544	12.77	15.6721	0.686558
0.56548	16.79	15.7083	0.685833
0.56552	13.34	15.7447	0.685106
0.56556	17.17	15.7813	0.684375
0.5656	13.92	15.8179	0.683641
0.56564	17.36	15.8548	0.682905
0.56568	14.06	15.8917	0.682166
0.56572	17.89	15.9288	0.681424
0.56576	14.92	15.966	0.680679
0.5658	17.94	16.0034	0.679932
0.56584	16.17	16.0409	0.679183
0.56588	17.65	16.0785	0.678431
0.56592	16.5	16.1162	0.677676
0.56596	16.98	16.154	0.67692
0.566	17.55	16.1919	0.676161
0.56604	16.21	16.23	0.6754
0.56608	18.42	16.2681	0.674637
0.56612	14.73	16.3064	0.673872
0.56616	18.85	16.3448	0.673105
0.5662	13.68	16.3832	0.672336
0.56624	18.75	16.4218	0.671564
0.56628	13.39	16.4605	0.670791
0.56632	18.61	16.4992	0.670016
0.56636	12.82	16.5381	0.669238
0.5664	18.46	16.577	0.668459
0.56644	13.39	16.6161	0.667678
0.56648	18.13	16.6553	0.666895
0.56652	13.77	16.6945	0.66611
0.56656	17.79	16.7338	0.665324
0.5666	14.16	16.7732	0.664535
0.56664	18.03	16.8127	0.663746
0.56668	14.97	16.8523	0.662954
0.56672	18.51	16.8919	0.662161
0.56676	15.54	16.9316	0.661367
0.5668	18.66	16.9714	0.660572
0.56684	15.26	17.0113	0.659775
0.56688	18.66	17.0511	0.658977
0.56692	17.03	17.0911	0.658178
0.56696	18.89	17.1311	0.657378
0.567	17.79	17.1711	0.656578
0.56704	18.08	17.2112	0.655776
0.56708	18.51	17.2513	0.654974
0.56712	16.88	17.2915	0.65417
0.56716	19.76	17.3317	0.653367
0.5672	15.78	17.3719	0.652562
0.56724	20.28	17.4121	0.651757
0.56728	14.97	17.4524	0.650952
0.56732	20.19	17.4927	0.650145
0.56736	14.97	17.5331	0.649339
0.5674	19.85	17.5734	0.648531
0.56744	14.35	17.6138	0.647724
0.56748	19.37	17.6542	0.646915
0.56752	14.87	17.6947	0.646107
0.56756	19.18	17.7351	0.645298
0.5676	15.11	17.7756	0.644488
0.56764	18.89	17.8161	0.643679
0.56768	15.5	17.8566	0.642869
0.56772	19.18	17.8971	0.642058
0.56776	15.97	17.9376	0.641248
0.5678	19.9	17.9781	0.640438
0.56784	16.26	18.0186	0.639627
0.56788	20.09	18.0592	0.638817
0.56792	17.22	18.0997	0.638007
0.56796	21.1	18.1402	0.637197
0.568	18.03	18.1807	0.636387
0.56804	19.04	18.2211	0.635577
0.56808	18.99	18.2616	0.634768
0.56812	18.85	18.302	0.633959
0.56816	20.24	18.3425	0.633151
0.5682	17.99	18.3829	0.632343
0.56824	20.76	18.4232	0.631535
0.56828	17.03	18.4636	0.630728
0.56832	21	18.5039	0.629921
0.56836	16.45	18.5443	0.629115
0.5684	21.43	18.5846	0.628309
0.56844	15.78	18.6248	0.627503
0.56848	20.38	18.6651	0.626698
0.56852	15.54	18.7053	0.625894
0.56856	20.38	18.7455	0.625089
0.5686	15.97	18.7857	0.624286
0.56864	20.38	18.8259	0.623482
0.56868	16.17	18.866	0.622679
0.56872	20.67	18.9062	0.621877
0.56876	16.6	18.9463	0.621075
0.5688	20.43	18.9863	0.620273
0.56884	17.36	19.0264	0.619472
0.56888	21.24	19.0664	0.618672
0.56892	17.65	19.1064	0.617872
0.56896	21.19	19.1464	0.617073
0.569	18.42	19.1863	0.616274
0.56904	21.58	19.2262	0.615477
0.56908	19.18	19.266	0.614679
0.56912	21.05	19.3058	0.613883
0.56916	20.04	19.3456	0.613087
0.5692	20.33	19.3854	0.612292
0.56924	21.24	19.4251	0.611498
0.56928	19.23	19.4648	0.610704
0.56932	22.01	19.5044	0.609911
0.56936	17.7	19.5441	0.609119
0.5694	21.96	19.5837	0.608327
0.56944	17.17	19.6232	0.607535
0.56948	22.05	19.6628	0.606745
0.56952	16.65	19.7023	0.605954
0.56956	21.38	19.7418	0.605164
0.5696	16.65	19.7813	0.604374
0.56964	21.43	19.8208	0.603584
0.56968	17.36	19.8603	0.602795
0.56972	20.81	19.8997	0.602006
0.56976	17.17	19.9392	0.601217
0.5698	21.62	19.9786	0.600428
0.56984	17.99	20.018	0.599639
0.56988	21	20.0575	0.598851
0.56992	18.03	20.0969	0.598063
0.56996	21.86	20.1363	0.597275
0.57	18.37	20.1757	0.596487
0.57004	21.86	20.2151	0.595699
0.57008	19.42	20.2544	0.594911
0.57012	22.72	20.2938	0.594124
0.57016	19.76	20.3332	0.593337
0.5702	21.48	20.3725	0.59255
0.57024	21.29	20.4119	0.591763
0.57028	20.86	20.4512	0.590976
0.57032	22.63	20.4905	0.59019
0.57036	19.9	20.5298	0.589403
0.5704	22.87	20.5692	0.588617
0.57044	18.85	20.6085	0.58783
0.57048	22.77	20.6478	0.587044
0.57052	18.08	20.6871	0.586257
0.57056	23.3	20.7265	0.585471
0.5706	17.12	20.7658	0.584684
0.57064	22.82	20.8052	0.583897
0.57068	17.79	20.8445	0.583109
0.57072	22.72	20.8839	0.582322
0.57076	17.65	20.9233	0.581534
0.5708	21.91	20.9627	0.580745
0.57084	18.18	21.0022	0.579956
0.57088	21.67	21.0416	0.579167
0.57092	18.75	21.0811	0.578377
0.57096	22.44	21.1206	0.577587
0.571	19.09	21.1601	0.576797
0.57104	23.15	21.1997	0.576006
0.57108	19.47	21.2392	0.575215
0.57112	23.11	21.2788	0.574424
0.57116	20.38	21.3184	0.573632
0.5712	23.15	21.358	0.57284
0.57124	21.19	21.3977	0.572047
0.57128	22.39	21.4373	0.571254
0.57132	22.05	21.4769	0.570461
0.57136	21.77	21.5166	0.569668
0.5714	23.2	21.5563	0.568874
0.57144	20.62	21.596	0.56808
0.57148	23.97	21.6357	0.567285
0.57152	19.33	21.6755	0.56649
0.57156	24.69	21.7152	0.565695
0.5716	18.94	21.755	0.564899
0.57164	24.26	21.7948	0.564103
0.57168	18.66	21.8347	0.563306
0.57172	23.87	21.8745	0.562509
0.57176	18.56	21.9144	0.561711
0.5718	23.39	21.9543	0.560913
0.57184	18.75	21.9943	0.560114
0.57188	23.15	22.0343	0.559315
0.57192	19.33	22.0743	0.558515
0.57196	23.15	22.1143	0.557714
0.572	19.71	22.1544	0.556913
0.57204	23.39	22.1944	0.556111
0.57208	19.95	22.2346	0.555309
0.57212	23.73	22.2747	0.554506
0.57216	20.91	22.3149	0.553703
0.5722	24.54	22.355	0.552899
0.57224	21.67	22.3952	0.552096
0.57228	24.26	22.4354	0.551291
0.57232	22.05	22.4757	0.550487
0.57236	23.54	22.5159	0.549682
0.5724	23.68	22.5561	0.548877
0.57244	22.77	22.5964	0.548072
0.57248	24.3	22.6367	0.547267
0.57252	21.96	22.677	0.546461
0.57256	25.12	22.7172	0.545655
0.5726	20.95	22.7576	0.544849
0.57264	25.26	22.7979	0.544042
0.57268	19.9	22.8382	0.543236
0.57272	25.4	22.8786	0.542429
0.57276	19.71	22.9189	0.541622
0.5728	24.97	22.9593	0.540814
0.57284	20.14	22.9997	0.540006
0.57288	24.83	23.0401	0.539198
0.57292	20.24	23.0805	0.538389
0.57296	24.06	23.121	0.53758
0.573	20.67	23.1615	0.536771
0.57304	24.93	23.2019	0.535961
0.57308	21.14	23.2424	0.535152
0.57312	24.5	23.2829	0.534341
0.57316	21	23.3234	0.533531
0.5732	25.07	23.364	0.53272
0.57324	21.62	23.4045	0.53191
0.57328	25.69	23.4451	0.531099
0.57332	22.82	23.4856	0.530288
0.57336	25.64	23.5262	0.529477
0.5734	23.83	23.5667	0.528665
0.57344	24.93	23.6073	0.527854
0.57348	24.54	23.6479	0.527043
0.57352	23.92	23.6884	0.526231
0.57356	25.31	23.729	0.52542
0.5736	22.72	23.7696	0.524609
0.57364	26.22	23.8101	0.523797
0.57368	21.77	23.8507	0.522985
0.57372	26.46	23.8913	0.522174
0.57376	21.14	23.9319	0.521362
0.5738	26.36	23.9725	0.520549
0.57384	20.67	24.0131	0.519737
0.57388	25.84	24.0538	0.518924
0.57392	20.95	24.0944	0.518112
0.57396	25.5	24.1351	0.517298
0.574	21.1	24.1757	0.516485
0.57404	25.6	24.2164	0.515671
0.57408	21.81	24.2571	0.514858
0.57412	25.98	24.2978	0.514043
0.57416	21.96	24.3385	0.513229
0.5742	25.93	24.3793	0.512414
0.57424	22.68	24.42	0.5116
0.57428	26.36	24.4608	0.510785
0.57432	23.11	24.5015	0.50997
0.57436	26.17	24.5423	0.509154
0.5744	23.87	24.583	0.508339
0.57444	26.51	24.6238	0.507524
0.57448	24.69	24.6646	0.506708
0.57452	26.03	24.7054	0.505893
0.57456	25.84	24.7461	0.505077
0.5746	24.93	24.7869	0.504262
0.57464	26.75	24.8277	0.503446
0.57468	23.83	24.8685	0.50263
0.57472	27.42	24.9093	0.501815
0.57476	22.87	24.9501	0.500999
0.5748	27.42	24.9909	0.500182
0.57484	21.91	25.0317	0.499366
0.57488	27.37	25.0725	0.49855
0.57492	22.01	25.1134	0.497733
0.57496	27.22	25.1542	0.496916
0.575	22.01	25.1951	0.496098
0.57504	26.7	25.236	0.495281
0.57508	22.29	25.2769	0.494462
0.57512	26.55	25.3178	0.493644
0.57516	23.25	25.3587	0.492825
0.5752	26.79	25.3997	0.492006
0.57524	23.44	25.4407	0.491187
0.57528	26.79	25.4817	0.490367
0.57532	23.83	25.5227	0.489547
0.57536	27.42	25.5637	0.488726
0.5754	24.4	25.6047	0.487906
0.57544	27.56	25.6458	0.487085
0.57548	24.97	25.6868	0.486263
0.57552	27.61	25.7279	0.485442
0.57556	26.07	25.769	0.48462
0.5756	26.89	25.8101	0.483798
0.57564	27.13	25.8512	0.482976
0.57568	25.84	25.8923	0.482153
0.57572	28.18	25.9335	0.48133
0.57576	24.4	25.9746	0.480507
0.5758	28.85	26.0158	0.479684
0.57584	23.39	26.057	0.47886
0.57588	28.52	26.0982	0.478035
0.57592	22.72	26.1395	0.47721
0.57596	28.09	26.1808	0.476385
0.576	22.87	26.2221	0.475559
0.57604	28.42	26.2634	0.474732
0.57608	23.73	26.3048	0.473904
0.57612	27.42	26.3462	0.473076
0.57616	23.35	26.3876	0.472248
0.5762	27.42	26.4291	0.471418
0.57624	23.68	26.4706	0.470588
0.57628	27.65	26.5121	0.469757
0.57632	24.06	26.5537	0.468926
0.57636	28.13	26.5953	0.468094
0.5764	24.45	26.637	0.467261
0.57644	28.23	26.6786	0.466427
0.57648	25.31	26.7203	0.465593
0.57652	28.85	26.7621	0.464759
0.57656	26.17	26.8038	0.463924
0.5766	28.8	26.8456	0.463088
0.57664	27.13	26.8874	0.462252
0.57668	28.09	26.9292	0.461415
0.57672	28.04	26.9711	0.460578
0.57676	26.36	27.013	0.45974
0.5768	29.19	27.0549	0.458902
0.57684	25.6	27.0968	0.458063
0.57688	29.9	27.1388	0.457224
0.57692	24.69	27.1808	0.456384
0.57696	29.57	27.2228	0.455544
0.577	24.21	27.2649	0.454703
0.57704	29.66	27.3069	0.453861
0.57708	24.26	27.349	0.453019
0.57712	29.28	27.3912	0.452176
0.57716	24.54	27.4334	0.451333
0.5772	28.52	27.4756	0.450488
0.57724	24.59	27.5178	0.449643
0.57728	28.85	27.5601	0.448798
0.57732	25.4	27.6024	0.447951
0.57736	28.61	27.6448	0.447104
0.5774	25.98	27.6872	0.446257
0.57744	28.99	27.7296	0.445408
0.57748	26.17	27.772	0.444559
0.57752	29.95	27.8145	0.44371
0.57756	27.03	27.857	0.44286
0.5776	30.48	27.8995	0.442009
0.57764	27.08	27.9421	0.441158
0.57768	30.14	27.9847	0.440307
0.57772	28.47	28.0273	0.439455
0.57776	28.47	28.0699	0.438602
0.5778	29.57	28.1125	0.437749
0.57784	27.27	28.1552	0.436896
0.57788	30.62	28.1979	0.436042
0.57792	26.6	28.2406	0.435187
0.57796	31.15	28.2834	0.434332
0.578	25.84	28.3262	0.433477
0.57804	30.91	28.369	0.43262
0.57808	25.36	28.4118	0.431763
0.57812	30.24	28.4547	0.430905
0.57816	25.26	28.4977	0.430047
0.5782	29.86	28.5406	0.429187
0.57824	25.5	28.5836	0.428327
0.57828	30	28.6267	0.427466
0.57832	25.55	28.6698	0.426605
0.57836	29.86	28.7129	0.425742
0.5784	26.46	28.7561	0.424879
0.57844	30.53	28.7993	0.424015
0.57848	27.13	28.8425	0.42315
0.57852	30.43	28.8858	0.422284
0.57856	27.32	28.9291	0.421418
0.5786	30.91	28.9725	0.42055
0.57864	27.85	29.0159	0.419683
0.57868	30.91	29.0593	0.418814
0.57872	28.71	29.1028	0.417945
0.57876	30.57	29.1462	0.417075
0.5788	29.71	29.1898	0.416205
0.57884	29.71	29.2333	0.415334
0.57888	31.01	29.2769	0.414462
0.57892	28.56	29.3205	0.413589
0.57896	31.34	29.3642	0.412716
0.579	27.51	29.4079	0.411842
0.57904	31.91	29.4516	0.410968
0.57908	26.65	29.4954	0.410092
0.57912	32.06	29.5392	0.409216
0.57916	26.22	29.583	0.408339
0.5792	31.68	29.6269	0.407461
0.57924	25.79	29.6709	0.406583
0.57928	30.67	29.7148	0.405703
0.57932	26.27	29.7589	0.404823
0.57936	30.72	29.8029	0.403942
0.5794	27.27	29.847	0.40306
0.57944	31.24	29.8912	0.402177
0.57948	27.51	29.9354	0.401293
0.57952	30.91	29.9796	0.400408
0.57956	28.09	30.0238	0.399523
0.5796	31.96	30.0681	0.398637
0.57964	28.61	30.1125	0.397751
0.57968	32.25	30.1568	0.396864
0.57972	29.43	30.2012	0.395976
0.57976	31.87	30.2456	0.395088
0.5798	30.34	30.29	0.394199
0.57984	32.25	30.3345	0.39331
0.57988	31.24	30.379	0.392421
0.57992	31.1	30.4234	0.391531
0.57996	32.25	30.468	0.390641
0.58	29.57	30.5125	0.38975
0.58004	32.68	30.557	0.388859
0.58008	29.14	30.6016	0.387968
0.58012	33.64	30.6462	0.387076
0.58016	27.65	30.6908	0.386184
0.5802	32.92	30.7354	0.385292
0.58024	27.18	30.7801	0.384399
0.58028	32.68	30.8247	0.383505
0.58032	28.09	30.8694	0.382611
0.58036	32.49	30.9142	0.381717
0.5804	27.37	30.9589	0.380822
0.58044	32.49	31.0037	0.379926
0.58048	28.23	31.0485	0.37903
0.58052	32.78	31.0933	0.378134
0.58056	28.52	31.1382	0.377237
0.5806	32.25	31.183	0.376339
0.58064	29.14	31.2279	0.375442
0.58068	33.06	31.2728	0.374544
0.58072	30	31.3177	0.373646
0.58076	33.25	31.3626	0.372747
0.5808	30.77	31.4076	0.371848
0.58084	33.02	31.4525	0.37095
0.58088	31.58	31.4975	0.370051
0.58092	32.58	31.5424	0.369152
0.58096	32.63	31.5874	0.368252
0.581	31.87	31.6323	0.367353
0.58104	33.54	31.6773	0.366454
0.58108	30.48	31.7223	0.365555
0.58112	33.97	31.7672	0.364655
0.58116	29.9	31.8122	0.363756
0.5812	34.45	31.8572	0.362856
0.58124	29.04	31.9022	0.361957
0.58128	34.16	31.9472	0.361057
0.58132	28.52	31.9921	0.360157
0.58136	33.64	32.0371	0.359257
0.5814	28.99	32.0821	0.358357
0.58144	33.4	32.1271	0.357457
0.58148	29.09	32.1722	0.356557
0.58152	33.45	32.2172	0.355657
0.58156	29.57	32.2622	0.354756
0.5816	33.54	32.3072	0.353856
0.58164	30.34	32.3522	0.352956
0.58168	33.64	32.3972	0.352056
0.58172	30.67	32.4422	0.351156
0.58176	34.6	32.4872	0.350256
0.5818	31.44	32.5322	0.349356
0.58184	34.5	32.5772	0.348457
0.58188	32.01	32.6221	0.347558
0.58192	34.26	32.667	0.346659
0.58196	32.73	32.7119	0.345761
0.582	33.78	32.7568	0.344863
0.58204	34.02	32.8017	0.343966
0.58208	32.35	32.8465	0.343069
0.58212	35.31	32.8914	0.342173
0.58216	31.58	32.9361	0.341277
0.5822	35.7	32.9809	0.340382
0.58224	30.72	33.0257	0.339487
0.58228	35.94	33.0704	0.338593
0.58232	30.1	33.1151	0.337699
0.58236	35.31	33.1597	0.336805
0.5824	30.43	33.2044	0.335912
0.58244	34.93	33.249	0.33502
0.58248	30.1	33.2936	0.334128
0.58252	34.4	33.3382	0.333236
0.58256	30.14	33.3827	0.332345
0.5826	35.36	33.4273	0.331455
0.58264	31.2	33.4718	0.330565
0.58268	34.5	33.5162	0.329676
0.58272	31.39	33.5607	0.328787
0.58276	34.79	33.6051	0.327899
0.5828	32.06	33.6495	0.327011
0.58284	35.6	33.6938	0.326124
0.58288	32.58	33.7381	0.325238
0.58292	35.65	33.7824	0.324353
0.58296	32.87	33.8266	0.323469
0.583	35.7	33.8707	0.322585
0.58304	34.16	33.9149	0.321703
0.58308	34.93	33.9589	0.320821
0.58312	35.6	34.003	0.31994
0.58316	33.11	34.047	0.319061
0.5832	36.08	34.0909	0.318182
0.58324	32.87	34.1348	0.317305
0.58328	36.65	34.1786	0.316428
0.58332	32.15	34.2224	0.315552
0.58336	36.37	34.2661	0.314678
0.5834	31.2	34.3098	0.313804
0.58344	36.99	34.3534	0.312931
0.58348	31.1	34.397	0.31206
0.58352	35.79	34.4405	0.311189
0.58356	31.44	34.484	0.310319
0.5836	35.84	34.5275	0.309451
0.58364	32.15	34.5708	0.308583
0.58368	35.98	34.6142	0.307716
0.58372	32.06	34.6575	0.306851
0.58376	35.65	34.7007	0.305986
0.5838	32.68	34.7438	0.305123
0.58384	36.22	34.7869	0.304261
0.58388	33.3	34.83	0.3034
0.58392	37.08	34.873	0.302541
0.58396	33.45	34.9159	0.301682
0.584	36.94	34.9587	0.300826
0.58404	34.31	35.0015	0.29997
0.58408	36.94	35.0442	0.299116
0.58412	36.03	35.0868	0.298264
0.58416	36.22	35.1293	0.297413
0.5842	36.51	35.1718	0.296564
0.58424	35.17	35.2142	0.295716
0.58428	37.47	35.2565	0.29487
0.58432	34.07	35.2987	0.294025
0.58436	37.85	35.3409	0.293182
0.5844	33.11	35.383	0.292341
0.58444	37.99	35.425	0.291501
0.58448	32.25	35.4669	0.290662
0.58452	37.71	35.5088	0.289825
0.58456	32.39	35.5505	0.288989
0.5846	37.42	35.5922	0.288155
0.58464	32.54	35.6339	0.287322
0.58468	37.18	35.6754	0.286491
0.58472	32.78	35.7169	0.285661
0.58476	37.04	35.7584	0.284833
0.5848	33.3	35.7997	0.284006
0.58484	37.04	35.841	0.283181
0.58488	33.49	35.8822	0.282357
0.58492	37.56	35.9233	0.281534
0.58496	34.4	35.9643	0.280713
0.585	38.09	36.0053	0.279894
0.58504	34.93	36.0462	0.279076
0.58508	37.71	36.087	0.278261
0.58512	36.13	36.1277	0.277446
0.58516	38.09	36.1683	0.276634
0.5852	36.56	36.2088	0.275823
0.58524	37.23	36.2493	0.275014
0.58528	37.71	36.2897	0.274207
0.58532	35.98	36.3299	0.273402
0.58536	38.86	36.3701	0.272598
0.5854	34.79	36.4102	0.271796
0.58544	39.29	36.4502	0.270996
0.58548	33.97	36.4902	0.270197
0.58552	38.95	36.53	0.2694
0.58556	33.59	36.5698	0.268605
0.5856	38.95	36.6095	0.267811
0.58564	33.54	36.6491	0.267019
0.58568	38.38	36.6886	0.266228
0.58572	33.83	36.7281	0.265439
0.58576	37.85	36.7674	0.264651
0.5858	33.97	36.8068	0.263865
0.58584	37.99	36.846	0.26308
0.58588	34.55	36.8852	0.262297
0.58592	38.38	36.9243	0.261515
0.58596	35.12	36.9633	0.260735
0.586	38.81	37.0022	0.259956
0.58604	35.31	37.0411	0.259179
0.58608	39.05	37.0798	0.258403
0.58612	35.79	37.1185	0.257629
0.58616	39.38	37.1572	0.256857
0.5862	36.65	37.1957	0.256086
0.58624	38.76	37.2342	0.255316
0.58628	37.66	37.2726	0.254549
0.58632	38.04	37.3109	0.253783
0.58636	39.38	37.3491	0.253018
0.5864	35.94	37.3872	0.252255
0.58644	40.1	37.4253	0.251494
0.58648	36.32	37.4633	0.250734
0.58652	40.05	37.5012	0.249976
0.58656	34.93	37.5391	0.249219
0.5866	39.91	37.5768	0.248463
0.58664	34.6	37.6145	0.247709
0.58668	39.76	37.6522	0.246956
0.58672	34.4	37.6898	0.246205
0.58676	39.33	37.7273	0.245454
0.5868	34.93	37.7647	0.244705
0.58684	39.14	37.8021	0.243958
0.58688	35.27	37.8394	0.243211
0.58692	39.14	37.8767	0.242466
0.58696	35.31	37.9139	0.241721
0.587	39.24	37.9511	0.240978
0.58704	36.13	37.9882	0.240236
0.58708	39.81	38.0252	0.239496
0.58712	36.61	38.0622	0.238756
0.58716	39.76	38.0991	0.238018
0.5872	36.94	38.136	0.237281
0.58724	40	38.1727	0.236545
0.58728	38.04	38.2095	0.235811
0.58732	39.53	38.2461	0.235077
0.58736	38.81	38.2827	0.234345
0.5874	39.14	38.3193	0.233614
0.58744	39.81	38.3558	0.232885
0.58748	37.8	38.3922	0.232156
0.58752	40.67	38.4285	0.231429
0.58756	36.37	38.4649	0.230703
0.5876	41.39	38.5011	0.229978
0.58764	35.6	38.5373	0.229254
0.58768	41.06	38.5735	0.228531
0.58772	35.36	38.6096	0.227809
0.58776	40.39	38.6456	0.227088
0.5878	35.5	38.6816	0.226367
0.58784	40.53	38.7176	0.225648
0.58788	35.89	38.7535	0.224929
0.58792	40.29	38.7894	0.224212
0.58796	36.13	38.8253	0.223495
0.588	39.72	38.8611	0.222779
0.58804	36.56	38.8968	0.222063
0.58808	40.39	38.9326	0.221349
0.58812	37.23	38.9682	0.220635
0.58816	40.82	39.0039	0.219922
0.5882	37.71	39.0395	0.21921
0.58824	41.39	39.075	0.218499
0.58828	37.95	39.1106	0.217789
0.58832	41.2	39.146	0.21708
0.58836	39.29	39.1814	0.216371
0.5884	40.1	39.2168	0.215663
0.58844	40.05	39.2522	0.214956
0.58848	39.81	39.2875	0.21425
0.58852	41.39	39.3227	0.213545
0.58856	38.23	39.358	0.212841
0.5886	41.82	39.3931	0.212137
0.58864	37.32	39.4283	0.211434
0.58868	41.97	39.4634	0.210732
0.58872	36.94	39.4985	0.21003
0.58876	41.78	39.5336	0.209329
0.5888	36.56	39.5686	0.208628
0.58884	41.25	39.6036	0.207928
0.58888	36.27	39.6386	0.207228
0.58892	41.2	39.6736	0.206529
0.58896	36.89	39.7085	0.20583
0.589	40.39	39.7435	0.205131
0.58904	37.47	39.7784	0.204433
0.58908	41.11	39.8133	0.203735
0.58912	37.95	39.8482	0.203037
0.58916	40.58	39.883	0.202339
0.5892	38.42	39.9179	0.201642
0.58924	41.97	39.9527	0.200945
0.58928	38.42	39.9876	0.200249
0.58932	42.01	40.0224	0.199553
0.58936	39.57	40.0571	0.198857
0.5894	42.11	40.0919	0.198162
0.58944	40.24	40.1267	0.197467
0.58948	41.15	40.1614	0.196772
0.58952	41.58	40.1961	0.196078
0.58956	39.48	40.2308	0.195384
0.5896	42.45	40.2655	0.19469
0.58964	39	40.3002	0.193996
0.58968	43.16	40.3348	0.193303
0.58972	37.75	40.3695	0.19261
0.58976	42.59	40.4042	0.191917
0.5898	37.08	40.4388	0.191224
0.58984	43.31	40.4735	0.190531
0.58988	36.89	40.5081	0.189838
0.58992	42.3	40.5428	0.189145
0.58996	37.47	40.5774	0.188452
0.59	41.58	40.6121	0.187758
0.59004	37.75	40.6468	0.187065
0.59008	41.78	40.6814	0.186371
0.59012	38.14	40.7161	0.185678
0.59016	42.16	40.7508	0.184984
0.5902	38.71	40.7855	0.18429
0.59024	42.25	40.8202	0.183596
0.59028	39.05	40.8549	0.182901
0.59032	42.92	40.8896	0.182207
0.59036	39.62	40.9244	0.181513
0.5904	42.88	40.9591	0.180818
0.59044	40.91	40.9938	0.180124
0.59048	42.97	41.0285	0.179429
0.59052	42.01	41.0633	0.178735
0.59056	41.49	41.098	0.17804
0.5906	42.64	41.1327	0.177346
0.59064	40.53	41.1675	0.176651
0.59068	43.69	41.2022	0.175956
0.59072	39.24	41.237	0.175261
0.59076	43.88	41.2717	0.174566
0.5908	38.86	41.3065	0.17387
0.59084	43.45	41.3413	0.173174
0.59088	38.04	41.3761	0.172478
0.59092	43.74	41.4109	0.171782
0.59096	38.62	41.4457	0.171085
0.591	43.02	41.4806	0.170388
0.59104	38.19	41.5155	0.16969
0.59108	42.73	41.5504	0.168992
0.59112	38.76	41.5853	0.168293
0.59116	42.68	41.6203	0.167594
0.5912	39.29	41.6553	0.166895
0.59124	42.78	41.6903	0.166194
0.59128	39.43	41.7253	0.165494
0.59132	43.21	41.7604	0.164793
0.59136	40.53	41.7954	0.164091
0.5914	43.74	41.8305	0.163389
0.59144	41.3	41.8657	0.162687
0.59148	43.83	41.9008	0.161984
0.59152	42.21	41.936	0.161281
0.59156	43.31	41.9711	0.160577
0.5916	42.83	42.0063	0.159874
0.59164	42.59	42.0415	0.159169
0.59168	44.03	42.0768	0.158465
0.59172	40.82	42.112	0.157759
0.59176	44.41	42.1473	0.157054
0.5918	40	42.1826	0.156348
0.59184	44.89	42.2179	0.155641
0.59188	39.29	42.2533	0.154934
0.59192	44.6	42.2887	0.154226
0.59196	39.19	42.3241	0.153517
0.592	44.07	42.3596	0.152808
0.59204	39.14	42.3951	0.152098
0.59208	43.88	42.4306	0.151388
0.59212	39.76	42.4662	0.150676
0.59216	43.55	42.5018	0.149964
0.5922	40.15	42.5375	0.149251
0.59224	43.59	42.5731	0.148537
0.59228	40.29	42.6089	0.147823
0.59232	43.88	42.6446	0.147107
0.59236	40.87	42.6804	0.146391
0.5924	45.37	42.7163	0.145674
0.59244	41.06	42.7522	0.144957
0.59248	44.7	42.7881	0.144239
0.59252	42.3	42.824	0.14352
0.59256	44.5	42.86	0.1428
0.5926	43.45	42.896	0.14208
0.59264	43.16	42.932	0.141359
0.59268	44.36	42.9681	0.140637
0.59272	42.3	43.0042	0.139915
0.59276	45.03	43.0404	0.139192
0.5928	41.39	43.0766	0.138468
0.59284	45.46	43.1128	0.137744
0.59288	40.72	43.1491	0.137018
0.59292	45.8	43.1854	0.136292
0.59296	39.81	43.2217	0.135565
0.593	45.08	43.2581	0.134838
0.59304	39.67	43.2946	0.134109
0.59308	45.08	43.331	0.133379
0.59312	40.24	43.3676	0.132649
0.59316	44.65	43.4041	0.131917
0.5932	40.44	43.4407	0.131185
0.59324	44.79	43.4774	0.130452
0.59328	40.72	43.5141	0.129718
0.59332	44.89	43.5509	0.128983
0.59336	41.49	43.5876	0.128247
0.5934	45.6	43.6245	0.127511
0.59344	42.3	43.6613	0.126773
0.59348	45.8	43.6982	0.126035
0.59352	42.83	43.7352	0.125297
0.59356	45.65	43.7721	0.124557
0.5936	42.97	43.8091	0.123817
0.59364	45.51	43.8462	0.123077
0.59368	44.65	43.8832	0.122336
0.59372	44.79	43.9203	0.121594
0.59376	45.46	43.9574	0.120852
0.5938	43.26	43.9945	0.120109
0.59384	46.18	44.0317	0.119366
0.59388	42.54	44.0689	0.118622
0.59392	46.94	44.1061	0.117878
0.59396	41.34	44.1434	0.117132
0.594	46.23	44.1807	0.116387
0.59404	41.11	44.218	0.11564
0.59408	46.47	44.2554	0.114893
0.59412	40.91	44.2927	0.114145
0.59416	46.08	44.3302	0.113396
0.5942	40.91	44.3676	0.112647
0.59424	45.8	44.4052	0.111897
0.59428	41.82	44.4427	0.111146
0.59432	45.56	44.4803	0.110395
0.59436	42.54	44.5179	0.109642
0.5944	45.89	44.5555	0.10889
0.59444	42.4	44.5932	0.108136
0.59448	46.56	44.6309	0.107382
0.59452	42.92	44.6686	0.106627
0.59456	46.94	44.7064	0.105872
0.5946	43.59	44.7442	0.105116
0.59464	46.56	44.782	0.10436
0.59468	44.55	44.8198	0.103603
0.59472	46.13	44.8577	0.102846
0.59476	45.99	44.8956	0.102089
0.5948	45.6	44.9335	0.101331
0.59484	46.9	44.9714	0.100572
0.59488	44.07	45.0093	0.0998137
0.59492	47.42	45.0473	0.0990545
0.59496	42.97	45.0853	0.0982948
0.595	47.57	45.1233	0.0975347
0.59504	42.4	45.1613	0.0967741
0.59508	47.76	45.1994	0.096013
0.59512	42.06	45.2374	0.0952513
0.59516	46.99	45.2755	0.094489
0.5952	41.92	45.3137	0.0937262
0.59524	47.14	45.3519	0.0929628
0.59528	42.06	45.3901	0.0921988
0.59532	46.71	45.4283	0.0914342
0.59536	42.64	45.4666	0.090669
0.5954	46.42	45.5048	0.0899032
0.59544	43.07	45.5432	0.0891369
0.59548	46.71	45.5815	0.0883701
0.59552	43.74	45.6199	0.0876028
0.59556	47.23	45.6582	0.0868351
0.5956	44.12	45.6967	0.0860669
0.59564	47.85	45.7351	0.0852985
0.59568	44.98	45.7735	0.0845297
0.59572	47.66	45.812	0.0837606
0.59576	45.8	45.8504	0.0829913
0.5958	47.28	45.8889	0.0822217
0.59584	47.04	45.9274	0.081452
0.59588	46.13	45.9659	0.0806821
0.59592	47.95	46.0044	0.079912
0.59596	44.79	46.0429	0.0791418
0.596	48.72	46.0814	0.0783713
0.59604	43.26	46.12	0.0776007
0.59608	48.57	46.1585	0.0768299
0.59612	43.59	46.1971	0.0760589
0.59616	48.67	46.2356	0.0752876
0.5962	43.55	46.2742	0.0745161
0.59624	48.19	46.3128	0.0737444
0.59628	43.02	46.3514	0.0729724
0.59632	47.42	46.39	0.0722002
0.59636	43.45	46.4286	0.0714278
0.5964	47.66	46.4672	0.0706551
0.59644	43.79	46.5059	0.0698822
0.59648	47.76	46.5445	0.0691092
0.59652	44.07	46.5832	0.068336
0.59656	48.48	46.6219	0.0675627
0.5966	44.84	46.6605	0.0667894
0.59664	48.33	46.6992	0.0660161
0.59668	45.94	46.7379	0.0652428
0.59672	48.86	46.7765	0.0644696
0.59676	45.7	46.8152	0.0636965
0.5968	48.76	46.8538	0.0629235
0.59684	46.66	46.8925	0.0621508
0.59688	48.38	46.9311	0.0613782
0.59692	47.57	46.9697	0.0606059
0.59696	46.61	47.0083	0.0598339
0.597	49.19	47.0469	0.0590621
0.59704	46.08	47.0855	0.0582906
0.59708	49.29	47.124	0.0575194
0.59712	45.17	47.1626	0.0567485
0.59716	49.39	47.2011	0.0559778
0.5972	44.5	47.2396	0.0552073
0.59724	49.48	47.2781	0.0544372
0.59728	44.17	47.3166	0.0536672
0.59732	49.48	47.3551	0.0528976
0.59736	44.12	47.3936	0.0521281
0.5974	49	47.4321	0.051359
0.59744	44.55	47.4705	0.0505901
0.59748	48.43	47.5089	0.0498215
0.59752	45.13	47.5473	0.0490532
0.59756	48.91	47.5857	0.0482853
0.5976	45.22	47.6241	0.0475177
0.59764	49.39	47.6625	0.0467506
0.59768	46.27	47.7008	0.045984
0.59772	49.39	47.7391	0.0452179
0.59776	46.51	47.7774	0.0444524
0.5978	49.91	47.8156	0.0436874
0.59784	46.99	47.8538	0.0429232
0.59788	50.39	47.892	0.0421596
0.59792	48.14	47.9302	0.0413967
0.59796	48.86	47.9683	0.0406346
0.598	49.34	48.0063	0.0398733
0.59804	47.62	48.0444	0.0391127
0.59808	50.58	48.0824	0.0383529
0.59812	46.75	48.1203	0.0375939
0.59816	50.87	48.1582	0.0368357
0.5982	45.7	48.1961	0.0360782
0.59824	50.97	48.2339	0.0353214
0.59828	45.27	48.2717	0.0345654
0.59832	50.97	48.3095	0.03381
0.59836	45.27	48.3472	0.0330554
0.5984	49.82	48.3849	0.0323014
0.59844	45.51	48.4226	0.031548
0.59848	49.53	48.4602	0.0307954
0.59852	45.65	48.4978	0.0300433
0.59856	49.63	48.5354	0.029292
0.5986	45.99	48.5729	0.0285413
0.59864	49.77	48.6104	0.0277913
0.59868	46.51	48.6479	0.0270421
0.59872	50.3	48.6853	0.0262936
0.59876	47.52	48.7227	0.0255459
0.5988	50.82	48.76	0.0247991
0.59884	47.18	48.7973	0.0240531
0.59888	50.68	48.8346	0.023308
0.59892	48.38	48.8718	0.0225639
0.59896	50.54	48.909	0.0218207
0.599	49.72	48.9461	0.0210785
0.59904	49.48	48.9831	0.0203373
0.59908	50.82	49.0201	0.0195971
0.59912	48.43	49.0571	0.0188579
0.59916	51.21	49.094	0.0181196
0.5992	48.09	49.1309	0.0173824
0.59924	52.07	49.1677	0.0166461
0.59928	46.75	49.2045	0.0159108
0.59932	51.59	49.2412	0.0151764
0.59936	46.37	49.2779	0.0144429
0.5994	51.44	49.3145	0.0137103
0.59944	45.94	49.3511	0.0129784
0.59948	51.44	49.3876	0.0122475
0.59952	45.7	49.4241	0.0115173
0.59956	50.68	49.4606	0.0107879
0.5996	46.51	49.497	0.0100593
0.59964	51.06	49.5334	0.00933152
0.59968	47.04	49.5698	0.00860456
0.59972	50.49	49.6061	0.00787845
0.59976	47.95	49.6423	0.0071532
0.5998	50.92	49.6786	0.00642884
0.59984	48.19	49.7147	0.00570541
0.59988	52.26	49.7509	0.00498294
0.59992	48.96	49.7869	0.00426147
0.59996	51.88	49.8229	0.00354101
0.6	49.34	49.8589	0.00282159
0.60004	50.97	49.8948	0.00210324
0.60008	51.01	49.9307	0.00138595
0.60012	50.2	49.9665	0.000669735
0.60016	51.59	50.0023	-4.54032e-05
0.6002	49.34	50.038	-0.000759473
0.60024	52.35	50.0736	-0.00147249
0.60028	48.29	50.1092	-0.00218446
0.60032	52.59	50.1448	-0.00289542
0.60036	47.47	50.1803	-0.00360538
0.6004	52.98	50.2157	-0.00431436
0.60044	46.9	50.2511	-0.0050224
0.60048	52.45	50.2865	-0.00572951
0.60052	46.9	50.3218	-0.00643571
0.60056	51.83	50.3571	-0.00714102
0.6006	47.62	50.3923	-0.00784543
0.60064	51.49	50.4274	-0.00854897
0.60068	47.95	50.4626	-0.0092516
0.60072	51.44	50.4977	-0.00995334
0.60076	48.14	50.5327	-0.0106542
0.6008	51.83	50.5677	-0.011354
0.60084	49.1	50.6026	-0.0120529
0.60088	52.78	50.6375	-0.0127508
0.60092	49.39	50.6724	-0.0134477
0.60096	52.78	50.7072	-0.0141435
0.601	49.67	50.7419	-0.0148382
0.60104	52.64	50.7766	-0.0155319
0.60108	50.87	50.8112	-0.0162244
0.60112	51.88	50.8458	-0.0169157
0.60116	52.35	50.8803	-0.017606
0.6012	50.97	50.9148	-0.0182951
0.60124	52.83	50.9492	-0.018983
0.60128	49.72	50.9835	-0.0196699
0.60132	53.74	51.0178	-0.0203557
0.60136	48.72	51.052	-0.0210404
0.6014	53.5	51.0862	-0.0217241
0.60144	48.43	51.1203	-0.0224067
0.60148	53.12	51.1544	-0.0230884
0.60152	48.19	51.1885	-0.0237692
0.60156	53.12	51.2224	-0.024449
0.6016	48.09	51.2564	-0.0251279
0.60164	52.78	51.2903	-0.0258059
0.60168	48.24	51.3242	-0.0264831
0.60172	52.59	51.358	-0.0271593
0.60176	48.72	51.3917	-0.0278347
0.6018	52.26	51.4255	-0.0285092
0.60184	49.1	51.4591	-0.0291828
0.60188	53.07	51.4928	-0.0298554
0.60192	49.82	51.5264	-0.0305271
0.60196	53.65	51.5599	-0.0311978
0.602	50.44	51.5934	-0.0318675
0.60204	53.74	51.6268	-0.0325361
0.60208	51.01	51.6602	-0.0332037
0.60212	53.45	51.6935	-0.0338702
0.60216	51.49	51.7268	-0.0345355
0.6022	52.98	51.76	-0.0351998
0.60224	52.78	51.7931	-0.0358629
0.60228	51.68	51.8262	-0.036525
0.60232	54.13	51.8593	-0.0371859
0.60236	50.92	51.8923	-0.0378458
0.6024	54.22	51.9252	-0.0385045
0.60244	49.63	51.9581	-0.0391623
0.60248	54.89	51.991	-0.039819
0.60252	48.76	52.0237	-0.0404748
0.60256	54.22	52.0565	-0.0411296
0.6026	48.62	52.0892	-0.0417835
0.60264	53.98	52.1218	-0.0424365
0.60268	48.67	52.1544	-0.0430886
0.60272	53.69	52.187	-0.0437398
0.60276	49.39	52.2195	-0.0443902
0.6028	52.74	52.252	-0.0450397
0.60284	49.72	52.2844	-0.0456883
0.60288	53.41	52.3168	-0.0463361
0.60292	49.91	52.3491	-0.0469829
0.60296	53.65	52.3814	-0.0476287
0.603	51.3	52.4137	-0.0482736
0.60304	54.51	52.4459	-0.0489174
0.60308	51.16	52.478	-0.0495602
0.60312	54.17	52.5101	-0.0502018
0.60316	52.21	52.5421	-0.0508424
0.6032	53.89	52.5741	-0.0514817
0.60324	54.22	52.606	-0.0521199
0.60328	53.12	52.6378	-0.0527569
0.60332	54.08	52.6696	-0.0533928
0.60336	51.83	52.7014	-0.0540274
0.6034	54.89	52.733	-0.0546608
0.60344	51.73	52.7647	-0.055293
0.60348	55.75	52.7962	-0.0559241
0.60352	50.25	52.8277	-0.056554
0.60356	55.23	52.8591	-0.0571828
0.6036	49.72	52.8905	-0.0578105
0.60364	55.32	52.9219	-0.0584372
0.60368	49.63	52.9531	-0.0590628
0.60372	54.89	52.9844	-0.0596874
0.60376	50.3	53.0155	-0.060311
0.6038	53.89	53.0467	-0.0609335
0.60384	49.91	53.0778	-0.0615551
0.60388	54.36	53.1088	-0.0621757
0.60392	50.87	53.1398	-0.0627952
0.60396	54.65	53.1707	-0.0634137
0.604	50.68	53.2016	-0.0640312
0.60404	54.89	53.2324	-0.0646475
0.60408	51.3	53.2631	-0.0652628
0.60412	55.51	53.2938	-0.0658769
0.60416	52.4	53.3245	-0.0664898
0.6042	55.37	53.3551	-0.0671015
0.60424	53.22	53.3856	-0.067712
0.60428	54.89	53.4161	-0.0683212
0.60432	54.89	53.4465	-0.0689291
0.60436	53.65	53.4768	-0.0695358
0.6044	55.42	53.5071	-0.0701413
0.60444	52.64	53.5373	-0.0707454
0.60448	56.52	53.5674	-0.0713484
0.60452	51.68	53.5975	-0.0719501
0.60456	56.47	53.6275	-0.0725507
0.6046	50.82	53.6575	-0.0731501
0.60464	56.42	53.6874	-0.0737484
0.60468	50.1	53.7173	-0.0743456
0.60472	55.7	53.7471	-0.0749418
0.60476	50.82	53.7769	-0.075537
0.6048	55.27	53.8066	-0.0761312
0.60484	51.35	53.8362	-0.0767244
0.60488	54.7	53.8658	-0.0773167
0.60492	51.44	53.8954	-0.077908
0.60496	54.94	53.9249	-0.0784984
0.605	51.11	53.9544	-0.0790878
0.60504	55.42	53.9838	-0.0796763
0.60508	52.16	54.0132	-0.0802638
0.60512	56.09	54.0425	-0.0808503
0.60516	52.55	54.0718	-0.0814358
0.6052	56.18	54.101	-0.0820202
0.60524	52.93	54.1302	-0.0826036
0.60528	55.99	54.1593	-0.0831859
0.60532	54.84	54.1884	-0.0837671
0.60536	55.27	54.2174	-0.0843473
0.6054	55.08	54.2463	-0.0849264
0.60544	53.65	54.2752	-0.0855043
0.60548	56.33	54.3041	-0.0860813
0.60552	53.5	54.3329	-0.0866571
0.60556	57.28	54.3616	-0.087232
0.6056	52.07	54.3903	-0.0878059
0.60564	57.72	54.4189	-0.0883788
0.60568	51.59	54.4475	-0.0889508
0.60572	57	54.4761	-0.0895219
0.60576	50.97	54.5046	-0.0900921
0.6058	56.61	54.5331	-0.0906616
0.60584	51.11	54.5615	-0.0912302
0.60588	56.04	54.5899	-0.0917981
0.60592	51.83	54.6183	-0.0923653
0.60596	56.18	54.6466	-0.0929318
0.606	52.55	54.6749	-0.0934976
0.60604	55.27	54.7031	-0.0940627
0.60608	52.69	54.7314	-0.094627
0.60612	56.33	54.7595	-0.0951907
0.60616	53.36	54.7877	-0.0957537
0.6062	57.72	54.8158	-0.0963159
0.60624	53.84	54.8439	-0.0968774
0.60628	57	54.8719	-0.0974381
0.60632	54.6	54.8999	-0.0979982
0.60636	55.8	54.9279	-0.0985575
0.6064	56.23	54.9558	-0.0991161
0.60644	55.56	54.9837	-0.0996741
0.60648	56.66	55.0116	-0.100231
0.60652	54.32	55.0394	-0.100788
0.60656	57.19	55.0672	-0.101344
0.6066	53.31	55.095	-0.1019
0.60664	57.52	55.1227	-0.102455
0.60668	53.55	55.1505	-0.10301
0.60672	58	55.1782	-0.103564
0.60676	51.3	55.2059	-0.104118
0.6068	57.09	55.2336	-0.104672
0.60684	51.78	55.2613	-0.105226
0.60688	56.76	55.289	-0.105779
0.60692	52.07	55.3166	-0.106333
0.60696	56.95	55.3443	-0.106886
0.607	52.11	55.372	-0.107439
0.60704	55.27	55.3996	-0.107993
0.60708	52.93	55.4273	-0.108546
0.60712	57.19	55.455	-0.109099
0.60716	53.69	55.4826	-0.109653
0.6072	57.19	55.5103	-0.110206
0.60724	53.98	55.538	-0.110759
0.60728	58.05	55.5656	-0.111313
0.60732	54.75	55.5933	-0.111866
0.60736	57.52	55.6209	-0.112419
0.6074	55.27	55.6486	-0.112972
0.60744	56.85	55.6762	-0.113525
0.60748	56.76	55.7039	-0.114078
0.60752	56.52	55.7315	-0.114631
0.60756	58	55.7592	-0.115183
0.6076	55.08	55.7868	-0.115736
0.60764	57.19	55.8145	-0.116289
0.60768	54.13	55.8421	-0.116842
0.60772	58.91	55.8698	-0.117396
0.60776	52.26	55.8975	-0.117949
0.6078	58.39	55.9252	-0.118503
0.60784	52.69	55.9529	-0.119057
0.60788	58.19	55.9806	-0.119612
0.60792	52.07	56.0083	-0.120166
0.60796	57.91	56.0361	-0.120722
0.608	53.12	56.0639	-0.121277
0.60804	56.95	56.0917	-0.121834
0.60808	52.78	56.1195	-0.122391
0.60812	57.38	56.1474	-0.122948
0.60816	53.74	56.1753	-0.123506
0.6082	56.85	56.2032	-0.124064
0.60824	54.8	56.2311	-0.124623
0.60828	58.29	56.2591	-0.125182
0.60832	53.74	56.2871	-0.125741
0.60836	57.91	56.3151	-0.126301
0.6084	55.66	56.3431	-0.126862
0.60844	58.62	56.3711	-0.127423
0.60848	56.33	56.3992	-0.127984
0.60852	57.19	56.4273	-0.128546
0.60856	57	56.4554	-0.129107
0.6086	55.8	56.4835	-0.12967
0.60864	59.2	56.5116	-0.130232
0.60868	54.99	56.5397	-0.130795
0.60872	58.91	56.5679	-0.131358
0.60876	54.56	56.5961	-0.131922
0.6088	59.15	56.6243	-0.132486
0.60884	53.89	56.6525	-0.13305
0.60888	59.15	56.6807	-0.133615
0.60892	53.36	56.709	-0.13418
0.60896	58.24	56.7373	-0.134746
0.609	53.6	56.7656	-0.135312
0.60904	57.81	56.7939	-0.135878
0.60908	54.03	56.8223	-0.136445
0.60912	57.38	56.8506	-0.137013
0.60916	55.03	56.879	-0.13758
0.6092	58	56.9074	-0.138149
0.60924	54.99	56.9359	-0.138717
0.60928	57.09	56.9643	-0.139286
0.60932	55.66	56.9928	-0.139855
0.60936	58.82	57.0212	-0.140424
0.6094	56.37	57.0497	-0.140994
0.60944	59.1	57.0782	-0.141564
0.60948	56.37	57.1067	-0.142134
0.60952	59.06	57.1352	-0.142703
0.60956	57.81	57.1637	-0.143273
0.6096	58	57.1922	-0.143843
0.60964	58.91	57.2207	-0.144413
0.60968	57.43	57.2491	-0.144983
0.60972	58.05	57.2776	-0.145553
0.60976	55.66	57.3061	-0.146123
0.6098	59.53	57.3346	-0.146693
0.60984	54.6	57.3631	-0.147262
0.60988	60.35	57.3916	-0.147832
0.60992	54.8	57.4201	-0.148402
0.60996	59.77	57.4486	-0.148972
0.61	54.8	57.4771	-0.149542
0.61004	58.91	57.5056	-0.150112
0.61008	54.6	57.5341	-0.150682
0.61012	59.06	57.5626	-0.151252
0.61016	54.65	57.5911	-0.151822
0.6102	57.81	57.6196	-0.152392
0.61024	54.94	57.6481	-0.152962
0.61028	59.25	57.6766	-0.153533
0.61032	55.85	57.7051	-0.154103
0.61036	59.92	57.7336	-0.154672
0.6104	56.47	57.7621	-0.155242
0.61044	59.44	57.7906	-0.155812
0.61048	56.95	57.819	-0.156381
0.61052	59.92	57.8475	-0.15695
0.61056	57.33	57.8759	-0.157518
0.6106	59.82	57.9043	-0.158087
0.61064	58.72	57.9327	-0.158654
0.61068	58.15	57.9611	-0.159222
0.61072	59.82	57.9895	-0.159789
0.61076	57.81	58.0178	-0.160356
0.6108	60.44	58.0461	-0.160922
0.61084	56.18	58.0744	-0.161488
0.61088	61.02	58.1027	-0.162054
0.61092	55.32	58.131	-0.162619
0.61096	60.68	58.1592	-0.163184
0.611	55.47	58.1874	-0.163749
0.61104	59.63	58.2157	-0.164313
0.61108	54.99	58.2439	-0.164878
0.61112	59.73	58.2721	-0.165442
0.61116	54.65	58.3003	-0.166006
0.6112	59.82	58.3285	-0.166569
0.61124	55.51	58.3566	-0.167133
0.61128	60.06	58.3848	-0.167696
0.61132	56.47	58.4129	-0.168259
0.61136	60.4	58.4411	-0.168821
0.6114	56.71	58.4692	-0.169384
0.61144	59.96	58.4973	-0.169946
0.61148	56.71	58.5254	-0.170507
0.61152	59.96	58.5534	-0.171069
0.61156	57.76	58.5815	-0.171629
0.6116	60.49	58.6095	-0.17219
0.61164	58.43	58.6375	-0.17275
0.61168	59.77	58.6655	-0.173309
0.61172	60.11	58.6934	-0.173868
0.61176	58.77	58.7213	-0.174427
0.6118	60.92	58.7492	-0.174985
0.61184	57.95	58.7771	-0.175543
0.61188	61.02	58.805	-0.1761
0.61192	56.37	58.8328	-0.176656
0.61196	61.21	58.8606	-0.177212
0.612	56.33	58.8884	-0.177768
0.61204	61.31	58.9162	-0.178324
0.61208	56.28	58.9439	-0.178879
0.61212	61.02	58.9717	-0.179434
0.61216	55.61	58.9994	-0.179988
0.6122	60.2	59.0271	-0.180542
0.61224	55.61	59.0548	-0.181096
0.61228	60.25	59.0825	-0.181649
0.61232	56.28	59.1101	-0.182203
0.61236	60.92	59.1378	-0.182755
0.6124	57.28	59.1654	-0.183308
0.61244	60.63	59.193	-0.18386
0.61248	57.28	59.2206	-0.184412
0.61252	60.54	59.2482	-0.184963
0.61256	58.53	59.2757	-0.185514
0.6126	60.78	59.3032	-0.186064
0.61264	58.19	59.3307	-0.186614
0.61268	61.07	59.3582	-0.187164
0.61272	59.92	59.3856	-0.187712
0.61276	60.83	59.413	-0.18826
0.6128	60.16	59.4404	-0.188808
0.61284	60.2	59.4677	-0.189355
0.61288	61.11	59.4951	-0.189901
0.61292	58.05	59.5223	-0.190447
0.61296	62.55	59.5496	-0.190992
0.613	57.28	59.5768	-0.191537
0.61304	62.36	59.604	-0.192081
0.61308	57.48	59.6312	-0.192624
0.61312	61.64	59.6584	-0.193167
0.61316	56.47	59.6855	-0.19371
0.6132	62.07	59.7126	-0.194252
0.61324	57.09	59.7397	-0.194794
0.61328	61.64	59.7668	-0.195336
0.61332	56.61	59.7938	-0.195877
0.61336	61.83	59.8209	-0.196417
0.6134	56.37	59.8479	-0.196958
0.61344	60.59	59.8749	-0.197498
0.61348	58.05	59.9019	-0.198038
0.61352	60.92	59.9289	-0.198577
0.61356	58.29	59.9558	-0.199116
0.6136	61.59	59.9827	-0.199655
0.61364	59.15	60.0097	-0.200193
0.61368	62.5	60.0365	-0.200731
0.61372	60.11	60.0634	-0.201268
0.61376	61.31	60.0903	-0.201805
0.6138	60.01	60.1171	-0.202342
0.61384	60.54	60.1439	-0.202878
0.61388	61.64	60.1707	-0.203413
0.61392	59.39	60.1974	-0.203949
0.61396	62.36	60.2242	-0.204484
0.614	58.43	60.2509	-0.205018
0.61404	62.74	60.2776	-0.205552
0.61408	58	60.3043	-0.206086
0.61412	62.93	60.331	-0.206619
0.61416	57.09	60.3576	-0.207153
0.6142	62.69	60.3843	-0.207686
0.61424	57.43	60.4109	-0.208218
0.61428	62.6	60.4375	-0.208751
0.61432	57.38	60.4642	-0.209283
0.61436	61.98	60.4908	-0.209815
0.6144	57.48	60.5174	-0.210347
0.61444	62.65	60.544	-0.210879
0.61448	58.77	60.5706	-0.211411
0.61452	60.97	60.5971	-0.211943
0.61456	58.62	60.6237	-0.212474
0.6146	62.02	60.6503	-0.213006
0.61464	58.91	60.6768	-0.213537
0.61468	63.22	60.7034	-0.214068
0.61472	60.16	60.7299	-0.214598
0.61476	63.22	60.7564	-0.215129
0.6148	60.2	60.783	-0.215659
0.61484	62.07	60.8095	-0.216189
0.61488	61.88	60.8359	-0.216719
0.61492	61.4	60.8624	-0.217249
0.61496	62.36	60.8889	-0.217778
0.615	60.16	60.9154	-0.218307
0.61504	63.55	60.9418	-0.218837
0.61508	58.58	60.9683	-0.219366
0.61512	63.65	60.9947	-0.219895
0.61516	58.1	61.0212	-0.220424
0.6152	63.75	61.0477	-0.220953
0.61524	57.38	61.0741	-0.221483
0.61528	62.79	61.1006	-0.222012
0.61532	58.48	61.1271	-0.222542
0.61536	62.55	61.1536	-0.223072
0.6154	57.95	61.1801	-0.223602
0.61544	62.36	61.2066	-0.224132
0.61548	58	61.2331	-0.224663
0.61552	62.88	61.2597	-0.225194
0.61556	59.39	61.2862	-0.225725
0.6156	63.65	61.3128	-0.226256
0.61564	59.15	61.3394	-0.226788
0.61568	63.22	61.366	-0.22732
0.61572	59.73	61.3926	-0.227852
0.61576	63.27	61.4192	-0.228385
0.6158	60.4	61.4459	-0.228918
0.61584	64.13	61.4725	-0.229451
0.61588	61.45	61.4992	-0.229984
0.61592	62.55	61.5259	-0.230517
0.61596	63.17	61.5525	-0.231051
0.616	61.45	61.5792	-0.231585
0.61604	63.6	61.606	-0.232119
0.61608	60.68	61.6327	-0.232654
0.61612	63.75	61.6594	-0.233189
0.61616	59.25	61.6862	-0.233724
0.6162	63.89	61.713	-0.23426
0.61624	58.1	61.7398	-0.234797
0.61628	64.13	61.7667	-0.235334
0.61632	58.43	61.7936	-0.235872
0.61636	63.27	61.8205	-0.23641
0.6164	57.91	61.8475	-0.236949
0.61644	63.12	61.8744	-0.237489
0.61648	58.96	61.9015	-0.238029
0.61652	63.41	61.9285	-0.238571
0.61656	58.91	61.9556	-0.239113
0.6166	63.51	61.9828	-0.239655
0.61664	59.29	62.0099	-0.240199
0.61668	62.93	62.0371	-0.240743
0.61672	60.63	62.0644	-0.241287
0.61676	63.08	62.0916	-0.241833
0.6168	60.68	62.1189	-0.242378
0.61684	63.75	62.1462	-0.242925
0.61688	61.59	62.1736	-0.243472
0.61692	63.79	62.2009	-0.244019
0.61696	61.59	62.2283	-0.244567
0.617	62.88	62.2557	-0.245115
0.61704	63.7	62.2832	-0.245663
0.61708	62.07	62.3106	-0.246212
0.61712	64.18	62.3381	-0.246762
0.61716	61.11	62.3656	-0.247311
0.6172	63.75	62.3931	-0.247861
0.61724	59.44	62.4206	-0.248411
0.61728	64.9	62.4481	-0.248962
0.61732	59.49	62.4756	-0.249513
0.61736	64.85	62.5032	-0.250064
0.6174	59.49	62.5308	-0.250615
0.61744	64.46	62.5583	-0.251167
0.61748	59.58	62.5859	-0.251719
0.61752	64.94	62.6136	-0.252271
0.61756	60.01	62.6412	-0.252823
0.6176	63.89	62.6688	-0.253376
0.61764	60.63	62.6964	-0.253928
0.61768	63.7	62.724	-0.254481
0.61772	60.63	62.7517	-0.255034
0.61776	64.8	62.7793	-0.255586
0.6178	61.54	62.8069	-0.256139
0.61784	64.32	62.8346	-0.256691
0.61788	61.98	62.8622	-0.257243
0.61792	64.37	62.8898	-0.257796
0.61796	62.17	62.9174	-0.258347
0.618	64.23	62.9449	-0.258899
0.61804	63.32	62.9725	-0.25945
0.61808	63.75	63	-0.260001
0.61812	63.84	63.0276	-0.260551
0.61816	62.65	63.0551	-0.261101
0.6182	65.28	63.0825	-0.261651
0.61824	61.4	63.11	-0.2622
0.61828	65.61	63.1374	-0.262748
0.61832	60.68	63.1648	-0.263296
0.61836	66.52	63.1922	-0.263844
0.6184	60.16	63.2196	-0.264391
0.61844	65.61	63.2469	-0.264938
0.61848	60.49	63.2742	-0.265484
0.61852	64.99	63.3015	-0.26603
0.61856	59.01	63.3287	-0.266575
0.6186	64.7	63.356	-0.267119
0.61864	60.35	63.3832	-0.267663
0.61868	63.99	63.4103	-0.268207
0.61872	61.69	63.4375	-0.26875
0.61876	65.18	63.4646	-0.269292
0.6188	61.83	63.4917	-0.269833
0.61884	65.09	63.5187	-0.270374
0.61888	61.78	63.5457	-0.270913
0.61892	65.61	63.5726	-0.271452
0.61896	63.41	63.5995	-0.27199
0.619	65.76	63.6263	-0.272527
0.61904	63.94	63.6531	-0.273063
0.61908	65.8	63.6799	-0.273597
0.61912	64.7	63.7065	-0.274131
0.61916	63.79	63.7332	-0.274663
0.6192	65.18	63.7597	-0.275194
0.61924	62.93	63.7862	-0.275725
0.61928	66.52	63.8127	-0.276253
0.61932	60.54	63.8391	-0.276781
0.61936	67.19	63.8654	-0.277308
0.6194	61.26	63.8917	-0.277834
0.61944	66.57	63.9179	-0.278358
0.61948	60.78	63.9441	-0.278882
0.61952	66.14	63.9702	-0.279404
0.61956	60.78	63.9963	-0.279925
0.6196	66.38	64.0223	-0.280445
0.61964	60.83	64.0482	-0.280965
0.61968	65.9	64.0741	-0.281483
0.61972	60.78	64.1	-0.282
0.61976	65.37	64.1258	-0.282516
0.6198	62.36	64.1515	-0.28303
0.61984	64.8	64.1772	-0.283544
0.61988	62.79	64.2028	-0.284056
0.61992	66.47	64.2284	-0.284568
0.61996	62.5	64.2539	-0.285078
0.62	67.48	64.2793	-0.285586
0.62004	63.75	64.3047	-0.286094
0.62008	66.19	64.33	-0.2866
0.62012	65.28	64.3552	-0.287105
0.62016	65.47	64.3804	-0.287608
0.6202	66.33	64.4055	-0.288111
0.62024	64.46	64.4306	-0.288612
0.62028	67	64.4556	-0.289111
0.62032	62.74	64.4805	-0.28961
0.62036	66.14	64.5053	-0.290107
0.6204	62.93	64.5301	-0.290603
0.62044	66.67	64.5549	-0.291098
0.62048	61.83	64.5796	-0.291592
0.62052	66.67	64.6042	-0.292084
0.62056	60.97	64.6288	-0.292576
0.6206	66.14	64.6534	-0.293067
0.62064	61.02	64.6779	-0.293557
0.62068	65.95	64.7023	-0.294046
0.62072	61.74	64.7267	-0.294534
0.62076	65.95	64.7511	-0.295022
0.6208	61.35	64.7754	-0.295508
0.62084	66.09	64.7997	-0.295994
0.62088	63.75	64.8239	-0.296479
0.62092	66.71	64.8481	-0.296962
0.62096	62.98	64.8723	-0.297445
0.621	67.19	64.8963	-0.297927
0.62104	63.79	64.9204	-0.298408
0.62108	67.62	64.9444	-0.298888
0.62112	64.85	64.9683	-0.299366
0.62116	66.19	64.9922	-0.299844
0.6212	65.52	65.016	-0.300321
0.62124	65.71	65.0398	-0.300796
0.62128	66.28	65.0636	-0.301271
0.62132	64.03	65.0872	-0.301745
0.62136	67.72	65.1109	-0.302218
0.6214	63.03	65.1345	-0.30269
0.62144	68.01	65.158	-0.303161
0.62148	62.26	65.1815	-0.303631
0.62152	68.44	65.205	-0.3041
0.62156	62.6	65.2284	-0.304569
0.6216	67.72	65.2518	-0.305036
0.62164	62.45	65.2752	-0.305503
0.62168	67.53	65.2985	-0.30597
0.62172	62.31	65.3218	-0.306436
0.62176	66.71	65.345	-0.306901
0.6218	62.79	65.3683	-0.307366
0.62184	66.38	65.3915	-0.30783
0.62188	63.22	65.4147	-0.308293
0.62192	66.71	65.4378	-0.308756
0.62196	63.08	65.4609	-0.309219
0.622	66.76	65.4841	-0.309681
0.62204	63.41	65.5071	-0.310143
0.62208	67.96	65.5302	-0.310604
0.62212	64.85	65.5532	-0.311064
0.62216	66.86	65.5762	-0.311524
0.6222	65.52	65.5992	-0.311984
0.62224	66.91	65.6222	-0.312443
0.62228	66.14	65.6451	-0.312902
0.62232	65.66	65.668	-0.31336
0.62236	67.24	65.6909	-0.313818
0.6224	64.8	65.7137	-0.314275
0.62244	67.91	65.7366	-0.314732
0.62248	63.84	65.7594	-0.315188
0.62252	68.63	65.7822	-0.315645
0.62256	63.36	65.805	-0.316101
0.6226	68.49	65.8278	-0.316556
0.62264	62.93	65.8506	-0.317012
0.62268	68.15	65.8734	-0.317467
0.62272	62.17	65.8961	-0.317923
0.62276	67.05	65.9189	-0.318378
0.6228	62.74	65.9417	-0.318833
0.62284	68.01	65.9644	-0.319288
0.62288	62.74	65.9872	-0.319743
0.62292	67	66.0099	-0.320199
0.62296	63.08	66.0327	-0.320654
0.623	67.58	66.0555	-0.321109
0.62304	64.23	66.0782	-0.321564
0.62308	67.72	66.101	-0.322019
0.62312	64.46	66.1237	-0.322475
0.62316	68.44	66.1465	-0.32293
0.6232	65.04	66.1692	-0.323385
0.62324	67.34	66.192	-0.323839
0.62328	66.14	66.2147	-0.324294
0.62332	67.58	66.2374	-0.324749
0.62336	67.24	66.2602	-0.325203
0.6234	66.76	66.2829	-0.325658
0.62344	67.96	66.3056	-0.326112
0.62348	65.28	66.3283	-0.326566
0.62352	68.49	66.351	-0.327021
0.62356	63.65	66.3737	-0.327475
0.6236	69.49	66.3964	-0.327929
0.62364	63.27	66.4192	-0.328383
0.62368	69.59	66.4419	-0.328837
0.62372	63.51	66.4646	-0.329291
0.62376	68.63	66.4873	-0.329746
0.6238	62.98	66.51	-0.3302
0.62384	67.91	66.5327	-0.330655
0.62388	63.99	66.5555	-0.33111
0.62392	67.86	66.5782	-0.331565
0.62396	64.23	66.601	-0.33202
0.624	67.24	66.6238	-0.332475
0.62404	64.27	66.6465	-0.33293
0.62408	68.01	66.6693	-0.333386
0.62412	64.94	66.6921	-0.333842
0.62416	68.82	66.7149	-0.334298
0.6242	65.52	66.7377	-0.334753
0.62424	68.92	66.7605	-0.335209
0.62428	65.8	66.7833	-0.335665
0.62432	68.58	66.8061	-0.336121
0.62436	67.29	66.8289	-0.336578
0.6244	67.43	66.8517	-0.337034
0.62444	68.39	66.8745	-0.33749
0.62448	66.71	66.8973	-0.337946
0.62452	68.82	66.9201	-0.338402
0.62456	64.99	66.9429	-0.338858
0.6246	69.73	66.9657	-0.339315
0.62464	64.9	66.9886	-0.339771
0.62468	69.63	67.0114	-0.340228
0.62472	63.79	67.0342	-0.340685
0.62476	69.35	67.0571	-0.341142
0.6248	64.08	67.08	-0.341599
0.62484	68.34	67.1028	-0.342057
0.62488	63.41	67.1257	-0.342515
0.62492	68.25	67.1486	-0.342973
0.62496	64.61	67.1716	-0.343431
0.625	68.29	67.1945	-0.34389
0.62504	64.61	67.2175	-0.344349
0.62508	67.82	67.2404	-0.344809
0.62512	65.18	67.2634	-0.345268
0.62516	68.68	67.2864	-0.345728
0.6252	65.8	67.3094	-0.346188
0.62524	69.35	67.3324	-0.346649
0.62528	66.43	67.3555	-0.347109
0.62532	69.3	67.3785	-0.34757
0.62536	66.81	67.4015	-0.34803
0.6254	68.53	67.4245	-0.348491
0.62544	67.34	67.4476	-0.348951
0.62548	68.29	67.4706	-0.349412
0.62552	69.35	67.4936	-0.349872
0.62556	66.91	67.5166	-0.350333
0.6256	69.78	67.5397	-0.350793
0.62564	65.71	67.5627	-0.351254
0.62568	70.83	67.5857	-0.351714
0.62572	65.13	67.6087	-0.352175
0.62576	69.44	67.6317	-0.352635
0.6258	64.37	67.6548	-0.353095
0.62584	69.59	67.6778	-0.353556
0.62588	64.13	67.7008	-0.354017
0.62592	69.3	67.7239	-0.354477
0.62596	65.13	67.7469	-0.354938
0.626	69.01	67.7699	-0.355399
0.62604	65.23	67.793	-0.355859
0.62608	68.68	67.816	-0.35632
0.62612	65.61	67.839	-0.356781
0.62616	68.96	67.8621	-0.357241
0.6262	66	67.8851	-0.357702
0.62624	69.44	67.9081	-0.358162
0.62628	65.9	67.9311	-0.358622
0.62632	69.97	67.9541	-0.359082
0.62636	66.47	67.9771	-0.359542
0.6264	70.78	68.0001	-0.360001
0.62644	67.91	68.023	-0.36046
0.62648	69.78	68.0459	-0.360919
0.62652	69.63	68.0688	-0.361377
0.62656	67.96	68.0917	-0.361835
0.6266	69.59	68.1146	-0.362292
0.62664	67.19	68.1374	-0.362749
0.62668	70.69	68.1602	-0.363205
0.62672	66.14	68.183	-0.363661
0.62676	70.73	68.2058	-0.364116
0.6268	65.61	68.2285	-0.364571
0.62684	71.26	68.2513	-0.365025
0.62688	65.85	68.274	-0.365479
0.62692	70.78	68.2967	-0.365933
0.62696	64.46	68.3193	-0.366386
0.627	70.26	68.342	-0.366839
0.62704	65.52	68.3646	-0.367292
0.62708	69.49	68.3872	-0.367744
0.62712	64.99	68.4098	-0.368196
0.62716	69.44	68.4324	-0.368647
0.6272	65.47	68.4549	-0.369098
0.62724	70.97	68.4774	-0.369549
0.62728	67.14	68.4999	-0.369999
0.62732	70.97	68.5224	-0.370449
0.62736	66.43	68.5449	-0.370898
0.6274	70.73	68.5673	-0.371346
0.62744	67.19	68.5897	-0.371794
0.62748	70.4	68.6121	-0.372241
0.62752	68.96	68.6344	-0.372688
0.62756	71.02	68.6567	-0.373134
0.6276	69.11	68.679	-0.37358
0.62764	68.29	68.7012	-0.374024
0.62768	70.73	68.7234	-0.374468
0.62772	68.1	68.7456	-0.374912
0.62776	71.64	68.7677	-0.375355
0.6278	66.19	68.7898	-0.375797
0.62784	71.6	68.8119	-0.376239
0.62788	66.38	68.834	-0.37668
0.62792	71.69	68.856	-0.37712
0.62796	66.04	68.878	-0.377561
0.628	70.5	68.9	-0.378
0.62804	64.61	68.922	-0.37844
0.62808	70.73	68.9439	-0.378879
0.62812	65.61	68.9659	-0.379317
0.62816	70.45	68.9878	-0.379755
0.6282	67.05	69.0097	-0.380193
0.62824	70.88	69.0315	-0.380631
0.62828	66.71	69.0534	-0.381068
0.62832	70.45	69.0752	-0.381504
0.62836	67.29	69.097	-0.381941
0.6284	71.26	69.1188	-0.382377
0.62844	68.01	69.1406	-0.382812
0.62848	70.59	69.1623	-0.383247
0.62852	67.82	69.1841	-0.383682
0.62856	71.07	69.2058	-0.384116
0.6286	68.82	69.2275	-0.384549
0.62864	70.88	69.2491	-0.384982
0.62868	70.4	69.2707	-0.385415
0.62872	69.25	69.2924	-0.385847
0.62876	70.59	69.3139	-0.386279
0.6288	68.39	69.3355	-0.38671
0.62884	72.12	69.3571	-0.387141
0.62888	67.43	69.3786	-0.387572
[truncated: 23,003 more rows]

## Sheet: Sheet2
0.76588	51.68	49.9686	0.000627977	0.000157429
0.76592	49.82	49.9359	0.00128158	0.000506786
0.76596	51.83	49.9032	0.00193632	0.000861802
0.766	48.52	49.8704	0.00259221	0.00122252
0.76604	52.4	49.8375	0.00324923	0.00158898
0.76608	47.66	49.8046	0.00390738	0.00196125
0.76612	52.35	49.7717	0.00456665	0.00233938
0.76616	46.94	49.7386	0.00522702	0.00272342
0.7662	52.07	49.7056	0.00588847	0.00311343
0.76624	46.37	49.6724	0.006551	0.00350947
0.76628	51.64	49.6393	0.0072146	0.00391158
0.76632	46.99	49.606	0.00787925	0.00431983
0.76636	51.01	49.5728	0.00854496	0.00473426
0.7664	46.13	49.5394	0.00921172	0.00515493
0.76644	51.16	49.506	0.00987956	0.00558189
0.76648	46.94	49.4726	0.0105485	0.00601521
0.76652	51.11	49.4391	0.0112185	0.00645495
0.76656	46.85	49.4055	0.0118896	0.00690118
0.7666	50.44	49.3719	0.0125619	0.00735397
0.76664	48	49.3382	0.0132354	0.00781339
0.76668	51.97	49.3045	0.0139101	0.00827951
0.76672	47.76	49.2707	0.014586	0.00875241
0.76676	51.4	49.2368	0.0152633	0.00923214
0.7668	48.76	49.2029	0.0159418	0.00971876
0.76684	50.44	49.1689	0.0166217	0.0102124
0.76688	49.58	49.1349	0.0173029	0.010713
0.76692	50.2	49.1007	0.0179854	0.0112207
0.76696	50.06	49.0665	0.0186693	0.0117355
0.767	49.15	49.0323	0.0193546	0.0122577
0.76704	51.11	48.9979	0.0200412	0.0127871
0.76708	47.52	48.9635	0.0207291	0.0133239
0.76712	51.3	48.9291	0.0214183	0.0138682
0.76716	46.9	48.8946	0.0221089	0.01442
0.7672	51.4	48.86	0.0228006	0.0149795
0.76724	46.71	48.8253	0.0234936	0.0155467
0.76728	50.63	48.7906	0.0241877	0.0161216
0.76732	45.41	48.7558	0.0248831	0.0167045
0.76736	50.63	48.721	0.0255795	0.0172952
0.7674	45.37	48.6861	0.0262771	0.0178938
0.76744	49.86	48.6512	0.0269757	0.0185005
0.76748	45.75	48.6162	0.0276755	0.0191153
0.76752	49.91	48.5812	0.0283763	0.0197382
0.76756	46.23	48.5461	0.0290781	0.0203693
0.7676	49.67	48.5109	0.0297811	0.0210087
0.76764	46.42	48.4757	0.0304852	0.0216563
0.76768	50.06	48.4405	0.0311904	0.0223123
0.76772	46.85	48.4052	0.0318967	0.0229766
0.76776	50.1	48.3698	0.0326042	0.0236493
0.7678	47.28	48.3344	0.0333129	0.0243305
0.76784	50.44	48.2989	0.0340228	0.0250202
0.76788	47.47	48.2633	0.0347339	0.0257184
0.76792	50.06	48.2277	0.0354462	0.0264251
0.76796	48.38	48.192	0.0361598	0.0271403
0.768	49.48	48.1563	0.0368745	0.0278641
0.76804	49.05	48.1205	0.0375905	0.0285964
0.76808	47.81	48.0846	0.0383077	0.0293373
0.76812	50.63	48.0487	0.0390261	0.0300867
0.76816	46.61	48.0127	0.0397457	0.0308447
0.7682	51.01	47.9767	0.0404663	0.0316113
0.76824	45.65	47.9406	0.0411881	0.0323865
0.76828	50.77	47.9045	0.0419109	0.0331702
0.76832	44.79	47.8683	0.0426347	0.0339625
0.76836	49.91	47.832	0.0433594	0.0347634
0.7684	44.36	47.7957	0.0440851	0.0355729
0.76844	49.77	47.7594	0.0448116	0.0363909
0.76848	44.22	47.7231	0.0455389	0.0372175
0.76852	48.81	47.6866	0.0462671	0.0380527
0.76856	45.22	47.6502	0.046996	0.0388964
0.7686	48.67	47.6137	0.0477257	0.0397487
0.76864	45.51	47.5772	0.0484562	0.0406094
0.76868	48.81	47.5406	0.0491874	0.0414787
0.76872	44.7	47.504	0.0499193	0.0423564
0.76876	48.72	47.4674	0.0506521	0.0432426
0.7688	45.51	47.4307	0.0513856	0.0441372
0.76884	48.91	47.394	0.0521198	0.0450403
0.76888	46.13	47.3573	0.0528549	0.0459516
0.76892	49.34	47.3205	0.0535908	0.0468713
0.76896	46.27	47.2836	0.0543276	0.0477992
0.769	49.34	47.2467	0.0550652	0.0487353
0.76904	47.66	47.2098	0.0558036	0.0496795
0.76908	47.76	47.1729	0.0565429	0.0506318
0.76912	48.33	47.1358	0.057283	0.0515921
0.76916	47.09	47.0988	0.058024	0.0525602
0.7692	49.43	47.0617	0.0587658	0.053536
0.76924	45.7	47.0246	0.0595084	0.0545196
0.76928	50.06	46.9874	0.0602518	0.0555106
0.76932	44.36	46.9502	0.0609959	0.056509
0.76936	49.34	46.913	0.0617406	0.0575147
0.7694	43.93	46.8757	0.062486	0.0585275
0.76944	48.96	46.8384	0.063232	0.0595472
0.76948	44.07	46.8011	0.0639786	0.0605737
0.76952	48.96	46.7637	0.0647257	0.0616069
0.76956	43.4	46.7263	0.0654733	0.0626465
0.7696	48.38	46.6889	0.0662214	0.0636923
0.76964	43.4	46.6515	0.0669699	0.064744
0.76968	48.86	46.6141	0.0677188	0.0658016
0.76972	44.17	46.5766	0.0684681	0.0668646
0.76976	47.57	46.5391	0.0692178	0.0679328
0.7698	44.5	46.5016	0.0699679	0.069006
0.76984	47.95	46.4641	0.0707185	0.0700838
0.76988	44.93	46.4265	0.0714694	0.071166
0.76992	47.66	46.389	0.0722206	0.0722522
0.76996	45.32	46.3514	0.0729723	0.0733423
0.77	48.62	46.3138	0.0737244	0.0744357
0.77004	45.7	46.2762	0.0744768	0.0755322
0.77008	47.66	46.2385	0.0752297	0.0766315
0.77012	46.23	46.2009	0.0759829	0.0777332
0.77016	46.99	46.1632	0.0767365	0.0788368
0.7702	47.04	46.1255	0.0774904	0.079942
0.77024	45.46	46.0878	0.0782446	0.0810483
0.77028	48.67	46.05	0.0789991	0.0821552
0.77032	44.36	46.0123	0.0797538	0.0832623
0.77036	48.76	45.9746	0.0805087	0.0843692
0.7704	43.74	45.9368	0.0812638	0.0854752
0.77044	48.09	45.8991	0.082019	0.0865799
0.77048	42.73	45.8613	0.0827742	0.0876829
0.77052	48.29	45.8235	0.0835294	0.0887835
0.77056	42.4	45.7858	0.0842847	0.0898812
0.7706	47.66	45.748	0.0850398	0.0909755
0.77064	41.97	45.7103	0.0857948	0.0920657
0.77068	46.9	45.6725	0.0865497	0.0931513
0.77072	42.54	45.6348	0.0873044	0.0942316
0.77076	46.42	45.5971	0.0880589	0.095306
0.7708	42.92	45.5593	0.0888133	0.0963738
0.77084	46.94	45.5216	0.0895675	0.0974343
0.77088	43.5	45.4839	0.0903215	0.0984868
0.77092	47.04	45.4462	0.0910753	0.0995307
0.77096	43.64	45.4085	0.091829	0.100565
0.771	47.18	45.3709	0.0925826	0.101589
0.77104	44.12	45.3332	0.0933361	0.102603
0.77108	47.57	45.2955	0.0940895	0.103605
0.77112	44.6	45.2579	0.0948428	0.104594
0.77116	47.09	45.2202	0.095596	0.10557
0.7712	45.56	45.1825	0.0963491	0.106532
0.77124	46.13	45.1449	0.0971022	0.10748
0.77128	46.42	45.1072	0.0978551	0.108411
0.77132	44.31	45.0696	0.098608	0.109326
0.77136	47.23	45.032	0.0993607	0.110223
0.7714	43.26	44.9943	0.100113	0.111102
0.77144	47.42	44.9567	0.100866	0.111962
0.77148	42.54	44.9191	0.101618	0.112801
0.77152	47.28	44.8815	0.10237	0.113619
0.77156	41.82	44.8439	0.103121	0.114415
0.7716	46.99	44.8064	0.103872	0.115187
0.77164	41.58	44.7689	0.104623	0.115935
0.77168	46.8	44.7313	0.105373	0.116658
0.77172	41.06	44.6938	0.106123	0.117355
0.77176	45.51	44.6564	0.106873	0.118024
0.7718	41.68	44.6189	0.107622	0.118665
0.77184	45.75	44.5815	0.10837	0.119277
0.77188	41.87	44.5441	0.109118	0.119858
0.77192	45.99	44.5067	0.109866	0.120409
0.77196	42.59	44.4693	0.110613	0.120928
0.772	46.08	44.432	0.11136	0.121414
0.77204	42.64	44.3947	0.112106	0.121868
0.77208	46.51	44.3574	0.112852	0.12229
0.77212	43.07	44.3201	0.113598	0.12268
0.77216	46.37	44.2828	0.114343	0.123037
0.7722	43.69	44.2456	0.115088	0.123364
0.77224	46.27	44.2084	0.115833	0.123661
0.77228	44.89	44.1711	0.116577	0.123929
0.77232	44.98	44.1339	0.117321	0.12417
0.77236	45.51	44.0967	0.118065	0.124385
0.7724	43.35	44.0596	0.118808	0.124575
0.77244	46.18	44.0224	0.119552	0.124742
0.77248	42.16	43.9853	0.120294	0.124888
0.77252	46.42	43.9482	0.121036	0.125014
0.77256	41.44	43.9111	0.121778	0.125121
0.7726	46.42	43.874	0.12252	0.125211
0.77264	41.11	43.837	0.12326	0.125285
0.77268	45.41	43.8	0.124001	0.125344
0.77272	40.2	43.763	0.12474	0.125391
0.77276	45.46	43.726	0.125479	0.125425
0.7728	40.53	43.6891	0.126218	0.125449
0.77284	45.08	43.6522	0.126955	0.125463
0.77288	40.91	43.6154	0.127692	0.125468
0.77292	44.55	43.5786	0.128429	0.125466
0.77296	40.67	43.5418	0.129164	0.125457
0.773	44.74	43.505	0.1299	0.125441
0.77304	41.87	43.4683	0.130634	0.125421
0.77308	44.93	43.4316	0.131368	0.125397
0.77312	41.49	43.3949	0.132101	0.125369
0.77316	45.65	43.3583	0.132834	0.125338
0.7732	41.82	43.3217	0.133566	0.125304
0.77324	45.89	43.2851	0.134298	0.125269
0.77328	42.97	43.2486	0.135029	0.125232
0.77332	44.65	43.212	0.135759	0.125195
0.77336	43.98	43.1755	0.13649	0.125157
0.7734	43.07	43.139	0.137219	0.12512
0.77344	44.79	43.1026	0.137949	0.125083
0.77348	42.97	43.0661	0.138677	0.125047
0.77352	45.6	43.0297	0.139405	0.125011
0.77356	41.54	42.9933	0.140133	0.124977
0.7736	44.98	42.957	0.14086	0.124945
0.77364	40.72	42.9207	0.141587	0.124915
0.77368	45.6	42.8844	0.142313	0.124886
0.77372	39.76	42.8481	0.143038	0.12486
0.77376	44.93	42.8119	0.143762	0.124835
0.7738	39.67	42.7757	0.144486	0.124813
0.77384	44.22	42.7396	0.145209	0.124794
0.77388	39.53	42.7035	0.145931	0.124777
0.77392	43.88	42.6674	0.146652	0.124762
0.77396	40.1	42.6314	0.147372	0.12475
0.774	43.69	42.5954	0.148092	0.12474
0.77404	39.76	42.5595	0.148811	0.124732
0.77408	43.69	42.5236	0.149528	0.124726
0.77412	40.58	42.4877	0.150245	0.124722
0.77416	43.98	42.4519	0.150962	0.12472
0.7742	41.06	42.4162	0.151677	0.124719
0.77424	44.26	42.3804	0.152391	0.124719
0.77428	41.39	42.3447	0.153105	0.12472
0.77432	43.98	42.3091	0.153818	0.124721
0.77436	41.87	42.2735	0.154531	0.124723
0.7744	43.79	42.2379	0.155242	0.124724
0.77444	42.11	42.2024	0.155953	0.124725
0.77448	43.07	42.1669	0.156663	0.124724
0.77452	43.45	42.1314	0.157372	0.124722
0.77456	41.87	42.096	0.158081	0.124718
0.7746	44.17	42.0606	0.158789	0.124711
0.77464	40.2	42.0252	0.159496	0.124702
0.77468	44.74	41.9899	0.160202	0.124689
0.77472	39.14	41.9546	0.160907	0.124673
0.77476	44.7	41.9194	0.161611	0.124654
0.7748	39	41.8843	0.162315	0.124631
0.77484	44.12	41.8491	0.163018	0.124605
0.77488	38.38	41.814	0.163719	0.124576
0.77492	43.02	41.779	0.16442	0.124545
0.77496	38.38	41.744	0.165119	0.124511
0.775	43.12	41.7091	0.165818	0.124476
0.77504	38.9	41.6743	0.166515	0.12444
0.77508	42.97	41.6394	0.167211	0.124404
0.77512	39	41.6047	0.167906	0.124368
0.77516	42.88	41.57	0.168601	0.124333
0.7752	39.43	41.5353	0.169294	0.1243
0.77524	42.54	41.5007	0.169986	0.124269
0.77528	39.53	41.4661	0.170677	0.124241
0.77532	43.26	41.4316	0.171368	0.124216
0.77536	40.72	41.3971	0.172057	0.124195
0.7754	43.45	41.3627	0.172746	0.124178
0.77544	41.25	41.3283	0.173434	0.124166
0.77548	42.54	41.294	0.17412	0.124158
0.77552	41.34	41.2597	0.174806	0.124156
0.77556	42.11	41.2254	0.175492	0.124159
0.7756	42.21	41.1912	0.176176	0.124167
0.77564	40.72	41.157	0.17686	0.124182
0.77568	43.16	41.1229	0.177542	0.124202
0.77572	39.62	41.0888	0.178224	0.124228
0.77576	43.69	41.0547	0.178905	0.12426
0.7758	38.66	41.0207	0.179586	0.124298
0.77584	43.4	40.9867	0.180265	0.124343
0.77588	37.52	40.9528	0.180943	0.124393
0.77592	42.92	40.919	0.181621	0.124449
0.77596	37.42	40.8851	0.182297	0.12451
0.776	42.83	40.8514	0.182973	0.124576
0.77604	37.71	40.8176	0.183647	0.124648
0.77608	42.59	40.784	0.184321	0.124724
0.77612	37.75	40.7503	0.184994	0.124805
0.77616	41.49	40.7167	0.185665	0.124891
0.7762	38.14	40.6832	0.186336	0.12498
0.77624	41.82	40.6497	0.187006	0.125073
0.77628	39	40.6163	0.187675	0.125169
0.77632	41.92	40.5829	0.188343	0.125269
0.77636	39	40.5495	0.18901	0.125371
0.7764	42.4	40.5162	0.189676	0.125477
0.77644	39.09	40.4829	0.190342	0.125585
0.77648	42.59	40.4497	0.191007	0.125695
0.77652	39.76	40.4164	0.191671	0.125808
0.77656	42.25	40.3833	0.192335	0.125923
0.7766	40.58	40.3501	0.192998	0.12604
0.77664	41.11	40.317	0.19366	0.126159
0.77668	41.3	40.2839	0.194322	0.126281
0.77672	40.1	40.2509	0.194983	0.126405
0.77676	42.64	40.2178	0.195643	0.126531
0.7768	38.19	40.1848	0.196303	0.12666
0.77684	42.4	40.1519	0.196963	0.126792
0.77688	37.61	40.1189	0.197621	0.126926
0.77692	43.4	40.086	0.198279	0.127064
0.77696	36.84	40.0532	0.198937	0.127206
0.777	42.35	40.0203	0.199593	0.127352
0.77704	37.08	39.9875	0.200249	0.127502
0.77708	41.58	39.9548	0.200905	0.127657
0.77712	36.65	39.922	0.201559	0.127817
0.77716	41.63	39.8893	0.202213	0.127982
0.7772	36.56	39.8567	0.202866	0.128153
0.77724	40.87	39.8241	0.203519	0.128329
0.77728	37.42	39.7915	0.20417	0.128513
0.77732	41.44	39.7589	0.204821	0.128702
0.77736	38.09	39.7264	0.205472	0.128898
0.7774	41.3	39.6939	0.206122	0.1291
0.77744	37.71	39.6615	0.206771	0.12931
0.77748	41.3	39.629	0.207419	0.129525
0.77752	38.23	39.5966	0.208068	0.129748
0.77756	41.68	39.5642	0.208715	0.129977
0.7776	39.19	39.5319	0.209362	0.130212
0.77764	41.54	39.4995	0.210009	0.130454
0.77768	39.09	39.4672	0.210656	0.130702
0.77772	40.53	39.4349	0.211302	0.130956
0.77776	40.15	39.4026	0.211947	0.131215
0.7778	39.76	39.3704	0.212592	0.13148
0.77784	40.91	39.3381	0.213237	0.13175
0.77788	38.62	39.3059	0.213881	0.132025
0.77792	41.87	39.2737	0.214525	0.132305
0.77796	37.47	39.2416	0.215169	0.132588
0.778	41.78	39.2094	0.215812	0.132874
0.77804	36.41	39.1773	0.216454	0.133163
0.77808	41.92	39.1452	0.217096	0.133455
0.77812	35.65	39.1131	0.217738	0.133748
0.77816	41.11	39.0811	0.218378	0.134043
0.7782	35.55	39.0491	0.219018	0.134338
0.77824	41.3	39.0171	0.219658	0.134634
0.77828	36.13	38.9852	0.220297	0.13493
0.77832	39.76	38.9533	0.220935	0.135224
0.77836	36.51	38.9214	0.221572	0.135519
0.7784	39.91	38.8895	0.222209	0.135812
0.77844	36.84	38.8577	0.222845	0.136103
0.77848	39.96	38.826	0.223481	0.136394
0.77852	36.7	38.7942	0.224116	0.136683
0.77856	40.39	38.7625	0.22475	0.136971
0.7786	37.37	38.7308	0.225383	0.137257
0.77864	40.72	38.6992	0.226016	0.137542
0.77868	38.33	38.6676	0.226649	0.137827
0.77872	40.24	38.636	0.227281	0.13811
0.77876	38.38	38.6044	0.227912	0.138392
0.7788	39.67	38.5729	0.228543	0.138674
0.77884	39.09	38.5413	0.229173	0.138955
0.77888	38.86	38.5099	0.229803	0.139236
0.77892	40.39	38.4784	0.230432	0.139516
0.77896	37.52	38.447	0.231061	0.139796
0.779	41.15	38.4156	0.231689	0.140076
0.77904	36.56	38.3842	0.232316	0.140356
0.77908	41.01	38.3528	0.232943	0.140636
0.77912	36.03	38.3215	0.233569	0.140916
0.77916	40.63	38.2903	0.234195	0.141196
0.7792	34.64	38.259	0.234819	0.141476
0.77924	39.62	38.2278	0.235443	0.141756
0.77928	34.98	38.1967	0.236066	0.142036
0.77932	39.72	38.1656	0.236688	0.142316
0.77936	34.93	38.1345	0.23731	0.142597
0.7794	39	38.1035	0.23793	0.142878
0.77944	35.89	38.0725	0.23855	0.143161
0.77948	39.48	38.0416	0.239168	0.143443
0.77952	35.98	38.0107	0.239786	0.143727
0.77956	39.19	37.9798	0.240403	0.144012
0.7796	35.84	37.949	0.241019	0.144298
0.77964	39.62	37.9183	0.241635	0.144586
0.77968	36.84	37.8875	0.242249	0.144875
0.77972	39.29	37.8568	0.242863	0.145165
0.77976	37.32	37.8262	0.243476	0.145457
0.7798	39.43	37.7956	0.244089	0.14575
0.77984	37.56	37.765	0.2447	0.146045
0.77988	38.86	37.7344	0.245311	0.146341
0.77992	39.29	37.7039	0.245921	0.146639
0.77996	37.28	37.6735	0.246531	0.146937
0.78	39.09	37.643	0.24714	0.147237
0.78004	36.27	37.6126	0.247748	0.147538
0.78008	40.05	37.5822	0.248355	0.14784
0.78012	35.7	37.5519	0.248962	0.148142
0.78016	40.15	37.5216	0.249567	0.148445
0.7802	34.36	37.4914	0.250172	0.148749
0.78024	39.57	37.4612	0.250776	0.149053
0.78028	33.93	37.431	0.251379	0.149357
0.78032	39.19	37.4009	0.251981	0.149662
0.78036	34.02	37.3709	0.252583	0.149968
0.7804	38.66	37.3408	0.253183	0.150274
0.78044	34.21	37.3109	0.253783	0.150581
0.78048	38.38	37.2809	0.254381	0.150888
0.78052	34.88	37.2511	0.254979	0.151196
0.78056	38.33	37.2212	0.255575	0.151504
0.7806	34.26	37.1914	0.256171	0.151814
0.78064	38.38	37.1617	0.256766	0.152123
0.78068	35.22	37.132	0.257361	0.152434
0.78072	39.33	37.1023	0.257954	0.152745
0.78076	35.65	37.0727	0.258547	0.153057
0.7808	39.19	37.043	0.259139	0.153369
0.78084	36.08	37.0135	0.259731	0.153681
0.78088	39	36.9839	0.260322	0.153994
0.78092	37.56	36.9544	0.260912	0.154307
0.78096	38.09	36.9249	0.261502	0.15462
0.781	37.61	36.8954	0.262091	0.154934
0.78104	36.7	36.866	0.26268	0.155247
0.78108	38.33	36.8366	0.263269	0.155561
0.78112	36.17	36.8072	0.263857	0.155875
0.78116	39.48	36.7778	0.264444	0.156189
0.7812	34.07	36.7484	0.265031	0.156503
0.78124	39.57	36.7191	0.265617	0.156818
0.78128	33.93	36.6898	0.266203	0.157133
0.78132	39.14	36.6606	0.266789	0.157448
0.78136	33.25	36.6313	0.267373	0.157765
0.7814	38.52	36.6021	0.267957	0.158083
0.78144	33.4	36.5729	0.268541	0.158402
0.78148	38.04	36.5438	0.269124	0.158722
0.78152	33.49	36.5147	0.269706	0.159045
0.78156	37.66	36.4856	0.270288	0.159369
0.7816	33.97	36.4565	0.270869	0.159695
0.78164	37.66	36.4275	0.27145	0.160023
0.78168	34.21	36.3985	0.27203	0.160354
0.78172	37.85	36.3695	0.27261	0.160687
0.78176	34.74	36.3405	0.273189	0.161022
0.7818	37.71	36.3116	0.273768	0.16136
0.78184	34.93	36.2827	0.274346	0.1617
0.78188	38.19	36.2538	0.274925	0.162043
0.78192	35.46	36.2249	0.275502	0.162389
0.78196	37.99	36.196	0.27608	0.162737
0.782	36.37	36.1671	0.276657	0.163087
0.78204	37.47	36.1383	0.277234	0.16344
0.78208	36.65	36.1094	0.277811	0.163795
0.78212	36.7	36.0806	0.278388	0.164153
0.78216	37.95	36.0518	0.278965	0.164513
0.7822	34.98	36.023	0.279541	0.164875
0.78224	38.81	35.9941	0.280117	0.165241
0.78228	33.97	35.9653	0.280693	0.165608
0.78232	38.52	35.9366	0.281269	0.165979
0.78236	33.21	35.9078	0.281844	0.166352
0.7824	38.76	35.879	0.282419	0.166728
0.78244	33.25	35.8503	0.282994	0.167107
0.78248	37.8	35.8216	0.283569	0.167489
0.78252	32.2	35.7929	0.284143	0.167874
0.78256	37.08	35.7642	0.284717	0.168263
0.7826	32.78	35.7355	0.28529	0.168654
0.78264	37.18	35.7068	0.285863	0.169049
0.78268	33.02	35.6782	0.286436	0.169448
0.78272	36.8	35.6496	0.287008	0.16985
0.78276	33.06	35.621	0.28758	0.170255
0.7828	36.37	35.5924	0.288151	0.170665
0.78284	33.3	35.5639	0.288722	0.171078
0.78288	37.23	35.5354	0.289293	0.171496
0.78292	33.49	35.5068	0.289863	0.171917
0.78296	37.71	35.4783	0.290434	0.172343
0.783	34.4	35.4498	0.291004	0.172774
0.78304	37.37	35.4213	0.291574	0.173209
0.78308	35.74	35.3928	0.292143	0.173648
0.78312	36.61	35.3643	0.292713	0.174093
0.78316	36.75	35.3359	0.293283	0.174542
0.7832	34.83	35.3074	0.293852	0.174996
0.78324	36.65	35.2789	0.294421	0.175455
0.78328	34.74	35.2505	0.294991	0.175919
0.78332	37.47	35.222	0.29556	0.176388
0.78336	32.97	35.1936	0.296129	0.176861
0.7834	37.75	35.1651	0.296698	0.177338
0.78344	32.3	35.1367	0.297266	0.177821
0.78348	38.28	35.1083	0.297835	0.178307
0.78352	31.77	35.0798	0.298403	0.178797
0.78356	36.99	35.0514	0.298971	0.179292
0.7836	31.72	35.023	0.299539	0.179789
0.78364	36.46	34.9946	0.300107	0.18029
0.78368	31.91	34.9663	0.300675	0.180794
0.78372	36.51	34.9379	0.301242	0.181301
0.78376	32.58	34.9096	0.301809	0.181811
0.7838	36.13	34.8812	0.302376	0.182322
0.78384	32.3	34.8529	0.302942	0.182836
0.78388	36.41	34.8246	0.303509	0.183351
0.78392	32.73	34.7962	0.304075	0.183868
0.78396	36.46	34.7679	0.304642	0.184387
0.784	33.59	34.7396	0.305208	0.184906
0.78404	36.65	34.7113	0.305774	0.185427
0.78408	34.07	34.683	0.30634	0.185948
0.78412	36.61	34.6547	0.306906	0.18647
0.78416	34.55	34.6264	0.307473	0.186993
0.7842	36.03	34.5981	0.308039	0.187515
0.78424	35.41	34.5697	0.308605	0.188038
0.78428	34.83	34.5414	0.309172	0.188561
0.78432	36.46	34.5131	0.309738	0.189083
0.78436	33.49	34.4848	0.310305	0.189606
0.7844	37.08	34.4564	0.310871	0.190127
0.78444	32.2	34.4281	0.311438	0.190649
0.78448	36.89	34.3998	0.312004	0.19117
0.78452	31.58	34.3715	0.31257	0.19169
0.78456	36.84	34.3432	0.313137	0.192209
0.7846	30.86	34.3149	0.313703	0.192728
0.78464	36.08	34.2866	0.314269	0.193247
0.78468	30.77	34.2583	0.314835	0.193765
0.78472	35.6	34.23	0.3154	0.194283
0.78476	31.53	34.2017	0.315966	0.1948
0.7848	35.27	34.1734	0.316531	0.195318
0.78484	31.63	34.1452	0.317096	0.195836
0.78488	35.36	34.1169	0.317661	0.196353
0.78492	32.01	34.0887	0.318226	0.196872
0.78496	35.55	34.0605	0.318791	0.19739
0.785	32.39	34.0323	0.319355	0.19791
0.78504	35.84	34.004	0.319919	0.19843
0.78508	32.11	33.9758	0.320484	0.19895
0.78512	36.17	33.9476	0.321048	0.199472
0.78516	32.73	33.9194	0.321612	0.199994
0.7852	35.94	33.8912	0.322177	0.200517
0.78524	33.78	33.863	0.322741	0.20104
0.78528	34.83	33.8347	0.323305	0.201564
0.78532	34.98	33.8065	0.323869	0.202089
0.78536	33.59	33.7783	0.324434	0.202614
0.7854	35.94	33.7501	0.324998	0.203139
0.78544	32.92	33.7219	0.325563	0.203665
0.78548	36.22	33.6936	0.326127	0.20419
0.78552	31.44	33.6654	0.326692	0.204716
0.78556	36.27	33.6372	0.327256	0.205241
0.7856	30.67	33.609	0.32782	0.205767
0.78564	35.89	33.5808	0.328385	0.206292
0.78568	30.05	33.5526	0.328949	0.206816
0.78572	35.22	33.5244	0.329512	0.207341
0.78576	30.34	33.4962	0.330076	0.207865
0.7858	35.03	33.468	0.33064	0.208389
0.78584	30.19	33.4398	0.331203	0.208912
0.78588	34.69	33.4117	0.331766	0.209435
0.78592	30.57	33.3835	0.332329	0.209958
0.78596	34.6	33.3554	0.332892	0.21048
0.786	31.15	33.3273	0.333454	0.211002
0.78604	34.88	33.2992	0.334017	0.211524
0.78608	31.68	33.271	0.334579	0.212046
0.78612	35.17	33.2429	0.335141	0.212567
0.78616	31.68	33.2148	0.335704	0.213088
0.7862	35.41	33.1867	0.336266	0.213609
0.78624	32.15	33.1586	0.336828	0.214129
0.78628	34.98	33.1305	0.33739	0.21465
0.78632	33.25	33.1024	0.337953	0.215171
0.78636	34.6	33.0742	0.338515	0.215692
0.7864	33.88	33.0461	0.339077	0.216213
0.78644	33.4	33.018	0.33964	0.216734
0.78648	34.98	32.9899	0.340202	0.217255
0.78652	32.3	32.9617	0.340765	0.217777
0.78656	35.98	32.9336	0.341328	0.218299
0.7866	30	32.9055	0.34189	0.218822
0.78664	35.46	32.8774	0.342453	0.219345
0.78668	30.05	32.8493	0.343015	0.219869
0.78672	35.6	32.8211	0.343577	0.220394
0.78676	29.71	32.793	0.344139	0.220919
0.7868	35.03	32.7649	0.344701	0.221444
0.78684	29.52	32.7369	0.345263	0.221971
0.78688	34.5	32.7088	0.345824	0.222497
0.78692	29.62	32.6807	0.346385	0.223025
0.78696	33.88	32.6527	0.346946	0.223552
0.787	29.57	32.6247	0.347507	0.22408
0.78704	33.69	32.5967	0.348067	0.224609
0.78708	30.48	32.5687	0.348627	0.225137
0.78712	33.97	32.5407	0.349186	0.225665
0.78716	30.72	32.5127	0.349745	0.226192
0.7872	33.88	32.4848	0.350304	0.22672
0.78724	31.05	32.4569	0.350863	0.227246
0.78728	34.36	32.4289	0.351421	0.227772
0.78732	31.48	32.401	0.351979	0.228297
0.78736	33.93	32.3731	0.352537	0.228821
0.7874	32.25	32.3452	0.353095	0.229344
0.78744	33.45	32.3174	0.353653	0.229865
0.78748	32.92	32.2895	0.35421	0.230384
0.78752	32.3	32.2617	0.354767	0.230902
0.78756	34.31	32.2338	0.355324	0.231419
0.7876	31.05	32.206	0.35588	0.231933
0.78764	34.6	32.1782	0.356436	0.232446
0.78768	30.29	32.1504	0.356992	0.232956
0.78772	34.93	32.1226	0.357548	0.233465
0.78776	29.19	32.0948	0.358103	0.233973
0.7878	34.4	32.0671	0.358658	0.234478
0.78784	29.23	32.0394	0.359213	0.234982
0.78788	33.64	32.0117	0.359767	0.235484
0.78792	28.28	31.984	0.36032	0.235985
0.78796	33.69	31.9563	0.360873	0.236485
0.788	28.71	31.9287	0.361426	0.236984
0.78804	33.11	31.9011	0.361977	0.237482
0.78808	28.9	31.8736	0.362529	0.237979
0.78812	32.97	31.846	0.36308	0.238476
0.78816	29.57	31.8185	0.36363	0.238972
0.7882	32.92	31.791	0.36418	0.239468
0.78824	30.05	31.7635	0.364729	0.239964
0.78828	33.45	31.7361	0.365278	0.24046
0.78832	30.38	31.7087	0.365827	0.240957
0.78836	33.25	31.6813	0.366375	0.241453
0.7884	30.81	31.6539	0.366923	0.241951
0.78844	33.93	31.6265	0.36747	0.242448
0.78848	31.34	31.5991	0.368017	0.242947
0.78852	32.58	31.5718	0.368564	0.243446
0.78856	32.68	31.5445	0.369111	0.243946
0.7886	31.91	31.5172	0.369657	0.244446
0.78864	33.45	31.4899	0.370203	0.244948
0.78868	30.24	31.4626	0.370749	0.245451
0.78872	33.93	31.4353	0.371294	0.245954
0.78876	29.14	31.408	0.371839	0.246459
0.7888	33.69	31.3808	0.372384	0.246964
0.78884	28.37	31.3536	0.372928	0.24747
0.78888	33.78	31.3264	0.373472	0.247977
0.78892	28.28	31.2992	0.374015	0.248485
0.78896	33.02	31.2721	0.374558	0.248994
0.789	27.99	31.245	0.375101	0.249504
0.78904	32.87	31.2178	0.375643	0.250014
0.78908	28.13	31.1908	0.376185	0.250524
0.78912	31.96	31.1637	0.376726	0.251035
0.78916	28.76	31.1367	0.377266	0.251546
0.7892	32.63	31.1097	0.377807	0.252056
0.78924	29.19	31.0827	0.378346	0.252567
0.78928	33.3	31.0557	0.378886	0.253077
0.78932	29.19	31.0288	0.379425	0.253587
0.78936	32.44	31.0018	0.379963	0.254096
0.7894	30.34	30.9749	0.380502	0.254605
0.78944	32.63	30.948	0.38104	0.255112
0.78948	30.38	30.9211	0.381577	0.255618
0.78952	32.3	30.8943	0.382115	0.256123
0.78956	31.24	30.8674	0.382652	0.256627
0.7896	31.77	30.8406	0.383188	0.257129
0.78964	31.77	30.8138	0.383725	0.25763
0.78968	31.01	30.7869	0.384261	0.258129
0.78972	33.02	30.7601	0.384797	0.258626
0.78976	28.95	30.7334	0.385333	0.259122
0.7898	33.49	30.7066	0.385868	0.259616
0.78984	28.52	30.6798	0.386403	0.260108
0.78988	33.83	30.6531	0.386938	0.260599
0.78992	27.46	30.6264	0.387472	0.261087
0.78996	32.39	30.5997	0.388005	0.261573
0.79	27.42	30.5731	0.388538	0.262058
0.79004	32.01	30.5465	0.389071	0.26254
0.79008	27.37	30.5199	0.389603	0.26302
0.79012	32.06	30.4933	0.390134	0.263498
0.79016	27.37	30.4667	0.390665	0.263973
0.7902	31.44	30.4402	0.391195	0.264446
0.79024	28.04	30.4138	0.391725	0.264916
0.79028	31.58	30.3873	0.392254	0.265384
0.79032	28.28	30.3609	0.392782	0.26585
0.79036	31.82	30.3345	0.39331	0.266312
0.7904	28.42	30.3081	0.393837	0.266773
0.79044	32.97	30.2818	0.394364	0.267231
0.79048	28.8	30.2555	0.394891	0.267686
0.79052	33.21	30.2292	0.395416	0.268139
0.79056	29.43	30.2029	0.395942	0.268589
0.7906	31.87	30.1767	0.396467	0.269037
0.79064	30.57	30.1504	0.396991	0.269483
0.79068	30.81	30.1242	0.397515	0.269926
0.79072	31.2	30.0981	0.398039	0.270367
0.79076	29.9	30.0719	0.398562	0.270806
0.7908	32.49	30.0458	0.399084	0.271243
0.79084	28.47	30.0197	0.399606	0.271677
0.79088	32.78	29.9936	0.400127	0.272109
0.79092	27.65	29.9676	0.400648	0.272538
0.79096	32.39	29.9416	0.401168	0.272965
0.791	27.08	29.9156	0.401688	0.27339
0.79104	31.68	29.8897	0.402206	0.273813
0.79108	25.88	29.8638	0.402724	0.274234
0.79112	31.39	29.838	0.403241	0.274652
0.79116	26.6	29.8121	0.403757	0.275068
0.7912	31.1	29.7864	0.404272	0.275482
0.79124	26.79	29.7607	0.404787	0.275894
0.79128	31.24	29.735	0.4053	0.276304
0.79132	27.22	29.7094	0.405812	0.276712
0.79136	31.15	29.6838	0.406324	0.277119
0.7914	27.61	29.6583	0.406835	0.277523
0.79144	31.15	29.6328	0.407345	0.277926
0.79148	27.85	29.6073	0.407854	0.278328
0.79152	31.34	29.5819	0.408362	0.278728
0.79156	28.42	29.5565	0.408869	0.279127
0.7916	31.29	29.5312	0.409376	0.279524
0.79164	28.99	29.5059	0.409882	0.27992
0.79168	30.62	29.4807	0.410387	0.280315
0.79172	29.66	29.4555	0.410891	0.280708
0.79176	30.57	29.4303	0.411394	0.2811
0.7918	30.77	29.4051	0.411897	0.28149
0.79184	29.57	29.38	0.412399	0.281879
0.79188	31.34	29.355	0.4129	0.282266
0.79192	27.99	29.33	0.413401	0.282651
0.79196	32.15	29.305	0.4139	0.283035
0.792	27.08	29.2801	0.414399	0.283417
0.79204	31.53	29.2552	0.414897	0.283797
0.79208	26.07	29.2303	0.415393	0.284176
0.79212	31.82	29.2055	0.415889	0.284552
0.79216	26.03	29.1808	0.416384	0.284927
0.7922	31.34	29.1561	0.416878	0.285301
0.79224	25.98	29.1315	0.41737	0.285672
0.79228	30.53	29.1069	0.417862	0.286042
0.79232	26.03	29.0824	0.418352	0.286411
0.79236	30.29	29.058	0.418841	0.286778
0.7924	26.51	29.0336	0.419329	0.287143
0.79244	30.57	29.0092	0.419816	0.287507
0.79248	26.75	28.9849	0.420301	0.28787
0.79252	29.86	28.9607	0.420786	0.288231
0.79256	27.51	28.9365	0.421269	0.28859
0.7926	30.67	28.9124	0.421751	0.288948
0.79264	27.37	28.8884	0.422232	0.289304
0.79268	30.91	28.8644	0.422712	0.289659
0.79272	28.13	28.8405	0.423191	0.290012
0.79276	30.72	28.8166	0.423669	0.290362
0.7928	28.61	28.7927	0.424145	0.290711
0.79284	28.95	28.769	0.424621	0.291058
0.79288	29.95	28.7452	0.425095	0.291403
0.79292	28.85	28.7216	0.425568	0.291746
0.79296	30.91	28.698	0.42604	0.292086
0.793	27.08	28.6744	0.426511	0.292425
0.79304	31.2	28.6509	0.426981	0.292761
0.79308	26.27	28.6275	0.42745	0.293095
0.79312	31.05	28.6041	0.427917	0.293427
0.79316	25.74	28.5808	0.428383	0.293757
0.7932	31.05	28.5576	0.428848	0.294085
0.79324	25.79	28.5344	0.429311	0.294411
0.79328	30.34	28.5113	0.429773	0.294735
0.79332	25.31	28.4883	0.430234	0.295056
0.79336	30.05	28.4653	0.430693	0.295376
0.7934	25.45	28.4424	0.431151	0.295694
0.79344	30.05	28.4196	0.431607	0.29601
0.79348	25.79	28.3969	0.432062	0.296324
0.79352	29.95	28.3742	0.432516	0.296635
0.79356	26.12	28.3516	0.432967	0.296945
0.7936	29.9	28.3291	0.433418	0.297252
0.79364	26.55	28.3067	0.433867	0.297558
0.79368	30.57	28.2843	0.434314	0.297861
0.79372	26.84	28.262	0.434761	0.298162
0.79376	30.38	28.2397	0.435205	0.298461
0.7938	27.75	28.2176	0.435649	0.298758
0.79384	29.9	28.1955	0.43609	0.299052
0.79388	28.61	28.1735	0.436531	0.299345
0.79392	28.71	28.1515	0.43697	0.299635
0.79396	29.14	28.1296	0.437407	0.299924
0.794	27.99	28.1078	0.437843	0.300211
0.79404	30	28.0861	0.438278	0.300496
0.79408	26.65	28.0645	0.438711	0.30078
0.79412	30.43	28.0429	0.439142	0.301063
0.79416	25.45	28.0214	0.439572	0.301344
0.7942	30.34	28	0.44	0.301624
0.79424	24.97	27.9787	0.440426	0.301903
0.79428	29.66	27.9575	0.440851	0.302182
0.79432	24.4	27.9363	0.441273	0.302459
0.79436	30	27.9153	0.441694	0.302736
0.7944	24.64	27.8943	0.442113	0.303012
0.79444	28.95	27.8735	0.44253	0.303287
0.79448	25.26	27.8527	0.442946	0.303562
0.79452	28.8	27.8321	0.443359	0.303836
0.79456	25.21	27.8115	0.44377	0.30411
0.7946	28.9	27.791	0.44418	0.304382
0.79464	25.45	27.7706	0.444587	0.304655
0.79468	29.04	27.7503	0.444993	0.304926
0.79472	25.88	27.7301	0.445397	0.305197
0.79476	29.57	27.71	0.445799	0.305467
0.7948	26.31	27.69	0.4462	0.305736
0.79484	29.57	27.6701	0.446598	0.306004
0.79488	26.84	27.6502	0.446995	0.306272
0.79492	29.14	27.6305	0.44739	0.306538
0.79496	28.13	27.6108	0.447784	0.306804
0.795	28.23	27.5912	0.448175	0.307069
0.79504	29.09	27.5717	0.448565	0.307333
0.79508	26.84	27.5523	0.448954	0.307596
0.79512	30.05	27.533	0.44934	0.307858
0.79516	25.84	27.5137	0.449725	0.308118
0.7952	29.62	27.4946	0.450108	0.308378
0.79524	24.97	27.4755	0.45049	0.308637
0.79528	30.19	27.4565	0.45087	0.308894
0.79532	24.78	27.4376	0.451248	0.30915
0.79536	29.62	27.4188	0.451624	0.309405
0.7954	24.21	27.4001	0.451998	0.309658
0.79544	29.09	27.3815	0.452371	0.30991
0.79548	24.21	27.3629	0.452741	0.31016
0.79552	28.9	27.3445	0.45311	0.310409
0.79556	24.21	27.3262	0.453477	0.310656
0.7956	28.18	27.3079	0.453842	0.310901
0.79564	24.54	27.2897	0.454205	0.311144
0.79568	28.66	27.2717	0.454567	0.311384
0.79572	24.73	27.2537	0.454926	0.311623
0.79576	28.76	27.2358	0.455284	0.31186
0.7958	25.84	27.218	0.455641	0.312094
0.79584	28.95	27.2002	0.455995	0.312326
0.79588	26.12	27.1826	0.456348	0.312556
0.79592	29.04	27.165	0.456699	0.312783
0.79596	26.12	27.1475	0.457049	0.313007
0.796	28.85	27.1301	0.457397	0.313229
0.79604	27.7	27.1128	0.457744	0.313448
0.79608	28.56	27.0955	0.458089	0.313665
0.79612	28.09	27.0783	0.458433	0.313878
0.79616	26.89	27.0612	0.458775	0.314088
0.7962	29.33	27.0442	0.459116	0.314296
0.79624	25.93	27.0272	0.459456	0.3145
0.79628	29.86	27.0103	0.459793	0.314701
0.79632	24.35	26.9935	0.46013	0.314899
0.79636	29.81	26.9768	0.460465	0.315094
0.7964	23.49	26.9601	0.460798	0.315285
0.79644	29.57	26.9435	0.461129	0.315473
0.79648	23.87	26.927	0.46146	0.315657
0.79652	28.56	26.9106	0.461788	0.315838
0.79656	23.97	26.8943	0.462115	0.316016
0.7966	28.18	26.878	0.46244	0.31619
0.79664	23.73	26.8618	0.462763	0.316361
0.79668	28.04	26.8458	0.463085	0.316529
0.79672	24.16	26.8297	0.463405	0.316693
0.79676	28.13	26.8138	0.463724	0.316854
0.7968	24.26	26.798	0.464041	0.317011
0.79684	28.18	26.7822	0.464356	0.317166
0.79688	25.12	26.7665	0.46467	0.317317
0.79692	28.56	26.7509	0.464982	0.317465
0.79696	25.5	26.7354	0.465293	0.317611
0.797	28.76	26.7199	0.465602	0.317753
0.79704	25.88	26.7045	0.46591	0.317892
0.79708	28.71	26.6892	0.466216	0.318028
0.79712	26.98	26.6739	0.466521	0.318162
0.79716	28.13	26.6587	0.466825	0.318292
0.7972	27.75	26.6436	0.467127	0.31842
0.79724	26.36	26.6286	0.467428	0.318545
0.79728	28.99	26.6136	0.467728	0.318668
0.79732	25.31	26.5987	0.468026	0.318788
0.79736	29.47	26.5838	0.468323	0.318906
0.7974	23.97	26.5691	0.468619	0.319021
0.79744	29.09	26.5544	0.468913	0.319134
0.79748	24.02	26.5397	0.469205	0.319245
0.79752	28.71	26.5252	0.469496	0.319353
0.79756	23.01	26.5107	0.469786	0.31946
0.7976	28.18	26.4963	0.470074	0.319564
0.79764	23.3	26.482	0.47036	0.319667
0.79768	28.23	26.4678	0.470645	0.319767
0.79772	23.25	26.4536	0.470928	0.319866
0.79776	27.94	26.4395	0.47121	0.319963
0.7978	23.63	26.4255	0.471489	0.320058
0.79784	27.7	26.4116	0.471768	0.320151
0.79788	24.59	26.3978	0.472044	0.320242
0.79792	28.04	26.384	0.47232	0.320331
0.79796	24.97	26.3703	0.472593	0.320419
0.798	28.37	26.3567	0.472865	0.320504
0.79804	25.07	26.3432	0.473136	0.320588
0.79808	28.09	26.3298	0.473405	0.32067
0.79812	25.45	26.3164	0.473673	0.320749
0.79816	28.18	26.3031	0.473939	0.320827
0.7982	26.51	26.2898	0.474203	0.320902
0.79824	27.51	26.2767	0.474467	0.320975
0.79828	27.89	26.2636	0.474728	0.321046
0.79832	26.07	26.2506	0.474989	0.321115
0.79836	28.23	26.2376	0.475248	0.321181
0.7984	24.64	26.2248	0.475505	0.321245
0.79844	28.42	26.212	0.475761	0.321306
0.79848	23.59	26.1993	0.476015	0.321366
0.79852	28.9	26.1866	0.476267	0.321422
0.79856	22.68	26.1741	0.476518	0.321476
0.7986	28.61	26.1616	0.476767	0.321528
0.79864	22.96	26.1493	0.477015	0.321577
0.79868	27.85	26.137	0.47726	0.321624
0.79872	22.72	26.1248	0.477504	0.321668
0.79876	27.7	26.1127	0.477746	0.32171
0.7988	23.59	26.1007	0.477987	0.321748
0.79884	26.94	26.0888	0.478225	0.321785
0.79888	23.63	26.0769	0.478462	0.321818
0.79892	26.65	26.0652	0.478696	0.321848
0.79896	23.39	26.0535	0.47893	0.321876
0.799	27.51	26.042	0.479161	0.3219
0.79904	24.26	26.0305	0.47939	0.321922
0.79908	27.65	26.0191	0.479618	0.321941
0.79912	24.93	26.0078	0.479844	0.321956
0.79916	27.56	25.9965	0.480069	0.321969
0.7992	26.12	25.9854	0.480292	0.321979
0.79924	27.22	25.9743	0.480513	0.321985
0.79928	26.07	25.9633	0.480733	0.321988
0.79932	26.6	25.9524	0.480951	0.321989
0.79936	27.46	25.9416	0.481168	0.321986
0.7994	25.07	25.9308	0.481383	0.321981
0.79944	27.85	25.9202	0.481597	0.321973
0.79948	25.02	25.9095	0.481809	0.321962
0.79952	28.04	25.899	0.48202	0.321948
0.79956	23.73	25.8886	0.482229	0.321931
0.7996	28.42	25.8782	0.482436	0.321912
0.79964	23.25	25.8679	0.482642	0.32189
0.79968	28.32	25.8577	0.482846	0.321865
0.79972	22.53	25.8476	0.483049	0.321838
0.79976	27.18	25.8375	0.483249	0.321808
0.7998	22.15	25.8276	0.483449	0.321776
0.79984	27.46	25.8177	0.483646	0.321741
0.79988	22.53	25.8079	0.483842	0.321703
0.79992	26.84	25.7982	0.484037	0.321663
0.79996	23.78	25.7885	0.484229	0.321619
0.8	26.7	25.779	0.48442	0.321574
0.80004	24.16	25.7695	0.48461	0.321525
0.80008	27.37	25.7601	0.484798	0.321474
0.80012	24.4	25.7508	0.484985	0.32142
0.80016	26.98	25.7415	0.48517	0.321364
0.8002	24.59	25.7323	0.485354	0.321305
0.80024	28.09	25.7232	0.485536	0.321243
0.80028	25.17	25.7141	0.485717	0.321179
0.80032	27.99	25.7051	0.485897	0.321112
0.80036	26.17	25.6962	0.486076	0.321043
0.8004	26.27	25.6874	0.486253	0.320971
0.80044	27.51	25.6786	0.486429	0.320897
0.80048	25.17	25.6698	0.486604	0.320821
0.80052	28.61	25.6611	0.486777	0.320743
0.80056	24.35	25.6525	0.486949	0.320663
0.8006	27.65	25.644	0.48712	0.32058
0.80064	23.78	25.6355	0.48729	0.320495
0.80068	27.75	25.6271	0.487458	0.320409
0.80072	22.48	25.6188	0.487625	0.32032
0.80076	28.04	25.6105	0.48779	0.320229
0.8008	22.1	25.6023	0.487954	0.320135
0.80084	27.37	25.5942	0.488117	0.32004
0.80088	22.48	25.5861	0.488278	0.319942
0.80092	27.03	25.5782	0.488437	0.319842
0.80096	22.39	25.5703	0.488595	0.31974
0.801	26.31	25.5624	0.488751	0.319635
0.80104	22.92	25.5547	0.488906	0.319528
0.80108	26.75	25.547	0.48906	0.319419
0.80112	23.83	25.5394	0.489212	0.319307
0.80116	26.84	25.5319	0.489362	0.319193
0.8012	23.3	25.5244	0.489511	0.319077
0.80124	27.56	25.517	0.489659	0.318958
0.80128	23.97	25.5097	0.489806	0.318837
0.80132	27.51	25.5025	0.489951	0.318714
0.80136	25.31	25.4953	0.490095	0.318589
0.8014	27.42	25.4881	0.490237	0.318462
0.80144	25.93	25.4811	0.490379	0.318333
0.80148	26.6	25.4741	0.490519	0.318202
0.80152	26.94	25.4671	0.490658	0.31807
0.80156	25.4	25.4602	0.490796	0.317935
0.8016	27.51	25.4534	0.490932	0.317799
0.80164	24.21	25.4466	0.491067	0.317661
0.80168	28.32	25.4399	0.491202	0.317521
0.80172	22.72	25.4333	0.491334	0.31738
0.80176	28.04	25.4267	0.491466	0.317236
0.8018	22.29	25.4202	0.491596	0.317091
0.80184	27.32	25.4138	0.491725	0.316944
0.80188	21.91	25.4074	0.491852	0.316795
0.80192	27.08	25.4011	0.491978	0.316645
0.80196	21.96	25.3949	0.492102	0.316492
0.802	26.55	25.3887	0.492225	0.316337
0.80204	22.44	25.3827	0.492347	0.31618
0.80208	27.18	25.3767	0.492467	0.316021
0.80212	22.15	25.3707	0.492585	0.31586
0.80216	26.36	25.3649	0.492703	0.315697
0.8022	23.35	25.3591	0.492818	0.315532
0.80224	27.08	25.3534	0.492933	0.315364
0.80228	23.2	25.3477	0.493046	0.315195
0.80232	26.94	25.3421	0.493158	0.315022
0.80236	24.4	25.3366	0.493268	0.314848
0.8024	26.7	25.3311	0.493378	0.314672
0.80244	24.45	25.3257	0.493486	0.314493
0.80248	26.98	25.3203	0.493593	0.314312
0.80252	25.4	25.3151	0.493699	0.314129
0.80256	26.17	25.3098	0.493804	0.313943
0.8026	26.75	25.3046	0.493908	0.313755
0.80264	24.97	25.2995	0.49401	0.313565
0.80268	27.65	25.2944	0.494112	0.313373
0.80272	24.54	25.2894	0.494213	0.313179
0.80276	27.51	25.2844	0.494312	0.312982
0.8028	22.82	25.2795	0.494411	0.312784
0.80284	27.89	25.2746	0.494508	0.312584
0.80288	22.68	25.2698	0.494605	0.312381
0.80292	28.18	25.265	0.4947	0.312177
0.80296	21.72	25.2603	0.494794	0.311972
0.803	26.7	25.2556	0.494887	0.311764
0.80304	22.05	25.251	0.494979	0.311556
0.80308	26.89	25.2465	0.49507	0.311345
0.80312	22.15	25.242	0.49516	0.311134
0.80316	26.46	25.2376	0.495248	0.310921
0.8032	22.87	25.2332	0.495336	0.310707
0.80324	26.22	25.2289	0.495422	0.310493
0.80328	22.96	25.2246	0.495507	0.310277
0.80332	27.18	25.2204	0.495592	0.310061
0.80336	23.25	25.2162	0.495675	0.309843
0.8034	27.08	25.2121	0.495757	0.309625
0.80344	24.26	25.2081	0.495839	0.309406
0.80348	26.65	25.204	0.49592	0.309187
0.80352	24.26	25.2	0.495999	0.308967
0.80356	26.75	25.1961	0.496078	0.308746
0.8036	25.69	25.1922	0.496157	0.308524
0.80364	26.89	25.1883	0.496234	0.308302
0.80368	26.17	25.1845	0.496311	0.308079
0.80372	25.64	25.1807	0.496387	0.307855
0.80376	27.03	25.1769	0.496462	0.307631
0.8038	24.5	25.1732	0.496536	0.307405
0.80384	27.65	25.1695	0.49661	0.307179
0.80388	23.06	25.1658	0.496683	0.306952
0.80392	27.8	25.1622	0.496755	0.306724
0.80396	22.68	25.1587	0.496827	0.306495
0.804	26.94	25.1551	0.496897	0.306265
0.80404	21.48	25.1517	0.496967	0.306034
0.80408	26.79	25.1482	0.497036	0.305802
0.80412	21.67	25.1448	0.497103	0.305568
0.80416	26.89	25.1415	0.49717	0.305334
0.8042	22.1	25.1382	0.497236	0.305098
0.80424	26.07	25.135	0.497301	0.30486
0.80428	22.15	25.1317	0.497365	0.304622
0.80432	26.27	25.1286	0.497428	0.304382
0.80436	23.11	25.1255	0.49749	0.30414
0.8044	26.84	25.1224	0.497552	0.303897
0.80444	23.39	25.1194	0.497612	0.303653
0.80448	26.79	25.1164	0.497672	0.303407
0.80452	23.87	25.1134	0.497731	0.303159
0.80456	27.13	25.1105	0.49779	0.30291
0.8046	24.21	25.1076	0.497847	0.302659
0.80464	26.7	25.1048	0.497904	0.302407
0.80468	25.45	25.102	0.497961	0.302153
0.80472	26.22	25.0992	0.498017	0.301897
0.80476	25.88	25.0964	0.498072	0.30164
0.8048	25.02	25.0937	0.498127	0.301382
0.80484	27.32	25.091	0.498181	0.301122
0.80488	23.97	25.0883	0.498234	0.300861
0.80492	27.27	25.0856	0.498287	0.300598
0.80496	22.68	25.083	0.49834	0.300333
0.805	27.46	25.0804	0.498392	0.300067
0.80504	22.34	25.0779	0.498443	0.2998
0.80508	27.08	25.0753	0.498493	0.299531
0.80512	22.05	25.0729	0.498543	0.29926
0.80516	27.27	25.0704	0.498592	0.298987
0.8052	22.05	25.068	0.49864	0.298712
0.80524	26.31	25.0656	0.498688	0.298436
0.80528	22.2	25.0632	0.498735	0.298158
0.80532	26.07	25.0609	0.498782	0.297877
0.80536	22.34	25.0586	0.498828	0.297595
0.8054	26.27	25.0564	0.498873	0.29731
0.80544	22.63	25.0541	0.498917	0.297024
0.80548	26.7	25.0519	0.498961	0.296735
0.80552	22.92	25.0498	0.499005	0.296444
0.80556	26.7	25.0476	0.499048	0.296151
0.8056	24.26	25.0455	0.49909	0.295855
0.80564	26.98	25.0434	0.499132	0.295557
0.80568	24.21	25.0413	0.499174	0.295257
0.80572	27.32	25.0392	0.499215	0.294954
0.80576	24.88	25.0372	0.499257	0.29465
0.8058	26.51	25.0351	0.499297	0.294342
0.80584	25.31	25.0331	0.499338	0.294033
0.80588	25.31	25.0311	0.499378	0.293721
0.80592	27.22	25.0291	0.499419	0.293406
0.80596	23.92	25.0271	0.499458	0.293089
0.806	27.85	25.0251	0.499498	0.292769
0.80604	22.96	25.0231	0.499537	0.292447
0.80608	27.75	25.0212	0.499576	0.292123
0.80612	22.77	25.0192	0.499615	0.291795
0.80616	26.89	25.0173	0.499653	0.291465
0.8062	22.01	25.0154	0.499691	0.291132
0.80624	26.46	25.0135	0.499729	0.290797
0.80628	21.77	25.0117	0.499766	0.290459
0.80632	26.46	25.0098	0.499803	0.290118
0.80636	22.53	25.008	0.49984	0.289774
0.8064	26.22	25.0062	0.499876	0.289427
0.80644	22.29	25.0044	0.499911	0.289078
0.80648	26.75	25.0027	0.499946	0.288726
0.80652	22.63	25.0009	0.499981	0.288371
0.80656	26.22	24.9992	0.500016	0.288014
0.8066	22.72	24.9975	0.50005	0.287654
0.80664	26.94	24.9958	0.500084	0.287291
0.80668	23.3	24.9941	0.500118	0.286925
0.80672	27.08	24.9924	0.500151	0.286557
0.80676	24.21	24.9908	0.500184	0.286186
0.8068	26.22	24.9891	0.500217	0.285813
0.80684	24.54	24.9875	0.50025	0.285436
0.80688	26.41	24.9858	0.500283	0.285057
0.80692	25.45	24.9842	0.500316	0.284676
0.80696	25.12	24.9826	0.500348	0.284291
0.807	26.31	24.981	0.500381	0.283904
0.80704	24.4	24.9793	0.500413	0.283513
0.80708	28.37	24.9777	0.500446	0.28312
0.80712	23.35	24.9761	0.500478	0.282724
0.80716	27.61	24.9745	0.50051	0.282324
0.8072	22.44	24.9729	0.500542	0.281922
0.80724	27.27	24.9713	0.500574	0.281516
0.80728	21.72	24.9697	0.500606	0.281107
0.80732	26.94	24.9681	0.500637	0.280694
0.80736	22.05	24.9666	0.500668	0.280278
0.8074	26.79	24.965	0.5007	0.279858
0.80744	22.15	24.9635	0.50073	0.279435
0.80748	26.84	24.962	0.500761	0.279007
0.80752	22.34	24.9604	0.500791	0.278577
0.80756	26.12	24.9589	0.500821	0.278142
0.8076	22.34	24.9574	0.500851	0.277704
0.80764	26.46	24.956	0.500881	0.277261
0.80768	23.01	24.9545	0.50091	0.276815
0.80772	26.22	24.953	0.500939	0.276365
0.80776	24.06	24.9516	0.500968	0.275911
0.8078	27.18	24.9501	0.500997	0.275453
0.80784	23.73	24.9487	0.501026	0.274991
0.80788	26.75	24.9473	0.501055	0.274525
0.80792	25.02	24.9458	0.501083	0.274055
0.80796	26.17	24.9444	0.501112	0.273581
0.808	25.21	24.943	0.50114	0.273103
0.80804	25.74	24.9416	0.501169	0.27262
0.80808	26.17	24.9402	0.501197	0.272134
0.80812	24.26	24.9387	0.501225	0.271643
0.80816	27.22	24.9373	0.501253	0.271149
0.8082	23.2	24.936	0.501281	0.27065
0.80824	27.61	24.9346	0.501308	0.270147
0.80828	22.01	24.9332	0.501336	0.26964
0.80832	27.42	24.9319	0.501363	0.269128
0.80836	21.62	24.9305	0.50139	0.268613
0.8084	27.03	24.9292	0.501416	0.268093
0.80844	22.15	24.9279	0.501443	0.26757
0.80848	26.07	24.9266	0.501468	0.267042
0.80852	21.72	24.9253	0.501494	0.266511
0.80856	25.93	24.9241	0.501519	0.265975
0.8086	22.05	24.9228	0.501543	0.265436
0.80864	26.17	24.9216	0.501568	0.264894
0.80868	22.82	24.9204	0.501591	0.264348
0.80872	26.46	24.9193	0.501615	0.263798
0.80876	23.11	24.9181	0.501638	0.263245
0.8088	27.18	24.917	0.501661	0.262689
0.80884	23.49	24.9158	0.501684	0.262129
0.80888	27.22	24.9147	0.501706	0.261566
0.80892	23.49	24.9136	0.501728	0.261001
0.80896	26.55	24.9125	0.50175	0.260432
0.809	24.97	24.9114	0.501771	0.259861
0.80904	26.22	24.9104	0.501792	0.259287
0.80908	26.03	24.9093	0.501813	0.25871
0.80912	25.02	24.9083	0.501834	0.25813
0.80916	27.22	24.9073	0.501855	0.257548
0.8092	23.54	24.9062	0.501875	0.256964
0.80924	27.61	24.9052	0.501895	0.256377
0.80928	23.35	24.9043	0.501915	0.255787
0.80932	27.56	24.9033	0.501934	0.255195
0.80936	22.25	24.9023	0.501953	0.254601
0.8094	27.22	24.9014	0.501971	0.254005
0.80944	21.72	24.9005	0.501989	0.253407
0.80948	26.7	24.8997	0.502007	0.252806
0.80952	21.05	24.8988	0.502024	0.252204
0.80956	25.98	24.898	0.50204	0.2516
0.8096	21.86	24.8972	0.502055	0.250994
0.80964	26.55	24.8965	0.50207	0.250387
0.80968	22.58	24.8958	0.502085	0.249777
0.80972	26.27	24.8951	0.502098	0.249167
0.80976	23.11	24.8944	0.502112	0.248554
0.8098	25.4	24.8938	0.502124	0.247941
0.80984	23.59	24.8932	0.502136	0.247326
0.80988	27.22	24.8927	0.502147	0.24671
0.80992	23.92	24.8921	0.502158	0.246092
0.80996	26.55	24.8916	0.502168	0.245474
0.81	23.54	24.8912	0.502177	0.244854
0.81004	27.27	24.8907	0.502186	0.244233
0.81008	24.78	24.8903	0.502194	0.243611
0.81012	25.93	24.8899	0.502202	0.242988
0.81016	25.69	24.8896	0.502209	0.242365
0.8102	25.5	24.8892	0.502215	0.24174
0.81024	26.79	24.889	0.502221	0.241114
0.81028	23.49	24.8887	0.502226	0.240488
0.81032	27.65	24.8885	0.50223	0.23986
0.81036	22.77	24.8883	0.502234	0.239232
0.8104	27.37	24.8882	0.502237	0.238604
0.81044	22.58	24.8881	0.502239	0.237974
0.81048	26.84	24.888	0.50224	0.237344
				0.236714
