# Supplementary material for: Shear Thickening Fluids in Cork Agglomerates: An Exploration of Advantages and Drawbacks
Source: Preprints.org preprint supplement (doi:10.20944/preprints202304.0004.v1), 2023-04-03
Supplement: Supplementary file 13 [file CG_x_30.xlsx]

## Sheet: data
Time - Force (Bridge) - Force	Amplitude - Force (Bridge) - Force	data
0	35.21	-35.21		-1
4e-05	13.96	-13.96
8e-05	28.27	-28.27
0.00012	20.15	-20.15
0.00016	40.35	-40.35
0.0002	24.74	-24.74
0.00024	24.77	-24.77
0.00028	30.52	-30.52
0.00032	27	-27
0.00036	27	-27
0.0004	34.86	-34.86
0.00044	21.88	-21.88
0.00048	33.47	-33.47
0.00052	24.72	-24.72
0.00056	34.51	-34.51
0.0006	24.89	-24.89
0.00064	38.79	-38.79
0.00068	9.774	-9.774
0.00072	27.69	-27.69
0.00076	22.4	-22.4
0.0008	20.99	-20.99
0.00084	23.04	-23.04
0.00088	52.43	-52.43
0.00092	24.48	-24.48
0.00096	35.61	-35.61
0.001	18.3	-18.3
0.00104	25.09	-25.09
0.00108	14.92	-14.92
0.00112	7.462	-7.462
0.00116	30.26	-30.26
0.0012	30.67	-30.67
0.00124	-12.74	12.74
0.00128	23.04	-23.04
0.00132	26.02	-26.02
0.00136	27.72	-27.72
0.0014	-17.51	17.51
0.00144	-44.01	44.01
0.00148	3.271	-3.271
0.00152	20.55	-20.55
0.00156	19.05	-19.05
0.0016	-25.8	25.8
0.00164	-37.02	37.02
0.00168	-16.01	16.01
0.00172	43.21	-43.21
0.00176	-6.295	6.295
0.0018	-10.28	10.28
0.00184	-30.51	30.51
0.00188	-10.92	10.92
0.00192	18.85	-18.85
0.00196	-24.79	24.79
0.002	-14.65	14.65
0.00204	-2.48	2.48
0.00208	21.83	-21.83
0.00212	-28	28
0.00216	-10.78	10.78
0.0022	-11.76	11.76
0.00224	32.66	-32.66
0.00228	14.22	-14.22
0.00232	-19.39	19.39
0.00236	-2.769	2.769
0.0024	12.26	-12.26
0.00244	11.19	-11.19
0.00248	18.01	-18.01
0.00252	20.96	-20.96
0.00256	18.47	-18.47
0.0026	13.27	-13.27
0.00264	5.438	-5.438
0.00268	22.17	-22.17
0.00272	15.73	-15.73
0.00276	4.311	-4.311
0.0028	20.64	-20.64
0.00284	-5.833	5.833
0.00288	3.329	-3.329
0.00292	13.99	-13.99
0.00296	-18.03	18.03
0.003	5.41	-5.41
0.00304	27.32	-27.32
0.00308	24.37	-24.37
0.00312	7.259	-7.259
0.00316	7.866	-7.866
0.0032	17.4	-17.4
0.00324	-6.382	6.382
0.00328	25.03	-25.03
0.00332	12.61	-12.61
0.00336	14.72	-14.72
0.0034	-3.087	3.087
0.00344	38.41	-38.41
0.00348	36.54	-36.54
0.00352	12.87	-12.87
0.00356	9.253	-9.253
0.0036	33.97m	-0.03397
0.00364	-18.75	18.75
0.00368	10.35	-10.35
0.00372	-5.746	5.746
0.00376	27.52	-27.52
0.0038	21.45	-21.45
0.00384	16.57	-16.57
0.00388	10.7	-10.7
0.00392	5.438	-5.438
0.00396	26.94	-26.94
0.004	-5.833	5.833
0.00404	10.7	-10.7
0.00408	13.04	-13.04
0.00412	1.826	-1.826
0.00416	31.1	-31.1
0.0042	23.44	-23.44
0.00424	13.16	-13.16
0.00428	19.17	-19.17
0.00432	27.32	-27.32
0.00436	21.42	-21.42
0.0044	27.26	-27.26
0.00444	26.19	-26.19
0.00448	16.65	-16.65
0.00452	15.21	-15.21
0.00456	25.9	-25.9
0.0046	27.92	-27.92
0.00464	30	-30
0.00468	36.45	-36.45
0.00472	16.22	-16.22
0.00476	31.88	-31.88
0.0048	34.4	-34.4
0.00484	29.05	-29.05
0.00488	37.03	-37.03
0.00492	6.19	-6.19
0.00496	19.17	-19.17
0.005	22.23	-22.23
0.00504	28.76	-28.76
0.00508	27.06	-27.06
0.00512	38.85	-38.85
0.00516	41.54	-41.54
0.0052	34.6	-34.6
0.00524	50.55	-50.55
0.00528	20.96	-20.96
0.00532	12.09	-12.09
0.00536	21.57	-21.57
0.0054	35.26	-35.26
0.00544	21.94	-21.94
0.00548	27.81	-27.81
0.00552	38.7	-38.7
0.00556	33.39	-33.39
0.0056	40.93	-40.93
0.00564	33.94	-33.94
0.00568	18.27	-18.27
0.00572	61.48	-61.48
0.00576	15.44	-15.44
0.0058	28.91	-28.91
0.00584	36.68	-36.68
0.00588	24.6	-24.6
0.00592	39.69	-39.69
0.00596	36.36	-36.36
0.006	8.733	-8.733
0.00604	37.23	-37.23
0.00608	33.01	-33.01
0.00612	35.76	-35.76
0.00616	20.9	-20.9
0.0062	32.23	-32.23
0.00624	49.92	-49.92
0.00628	23.33	-23.33
0.00632	24.05	-24.05
0.00636	27.06	-27.06
0.0064	34.11	-34.11
0.00644	26.39	-26.39
0.00648	51.33	-51.33
0.00652	9.225	-9.225
0.00656	23.65	-23.65
0.0066	37.17	-37.17
0.00664	19.11	-19.11
0.00668	16.88	-16.88
0.00672	15.84	-15.84
0.00676	25.12	-25.12
0.0068	39.43	-39.43
0.00684	24.43	-24.43
0.00688	40.35	-40.35
0.00692	32.43	-32.43
0.00696	28.88	-28.88
0.007	58.04	-58.04
0.00704	40.55	-40.55
0.00708	38.1	-38.1
0.00712	28.76	-28.76
0.00716	38.56	-38.56
0.0072	40.76	-40.76
0.00724	39.02	-39.02
0.00728	15.55	-15.55
0.00732	35.64	-35.64
0.00736	43.67	-43.67
0.0074	46.65	-46.65
0.00744	29.66	-29.66
0.00748	30.81	-30.81
0.00752	48.1	-48.1
0.00756	34.54	-34.54
0.0076	51.91	-51.91
0.00764	31.48	-31.48
0.00768	31.07	-31.07
0.00772	40.58	-40.58
0.00776	34.11	-34.11
0.0078	23.68	-23.68
0.00784	39.37	-39.37
0.00788	51.91	-51.91
0.00792	36.59	-36.59
0.00796	36.8	-36.8
0.008	34.63	-34.63
0.00804	24.48	-24.48
0.00808	50.41	-50.41
0.00812	47.32	-47.32
0.00816	50.29	-50.29
0.0082	38.3	-38.3
0.00824	29.43	-29.43
0.00828	23.39	-23.39
0.00832	46.28	-46.28
0.00836	29.92	-29.92
0.0084	32.52	-32.52
0.00844	42.29	-42.29
0.00848	17.43	-17.43
0.00852	42.06	-42.06
0.00856	33.96	-33.96
0.0086	23.59	-23.59
0.00864	35.35	-35.35
0.00868	31.74	-31.74
0.00872	6.739	-6.739
0.00876	43.56	-43.56
0.0088	30.9	-30.9
0.00884	36.13	-36.13
0.00888	34.57	-34.57
0.00892	22.46	-22.46
0.00896	44.11	-44.11
0.009	37.55	-37.55
0.00904	32	-32
0.00908	31.19	-31.19
0.00912	31.39	-31.39
0.00916	27.49	-27.49
0.0092	21.42	-21.42
0.00924	47.17	-47.17
0.00928	34.37	-34.37
0.00932	35.93	-35.93
0.00936	11.48	-11.48
0.0094	47.29	-47.29
0.00944	40.61	-40.61
0.00948	14.48	-14.48
0.00952	21.71	-21.71
0.00956	27.43	-27.43
0.0096	55.58	-55.58
0.00964	14.43	-14.43
0.00968	29.6	-29.6
0.00972	23.47	-23.47
0.00976	44.54	-44.54
0.0098	30.12	-30.12
0.00984	39.74	-39.74
0.00988	27.69	-27.69
0.00992	43.1	-43.1
0.00996	45.58	-45.58
0.01	24.92	-24.92
0.01004	49.98	-49.98
0.01008	23.99	-23.99
0.01012	39.14	-39.14
0.01016	26.62	-26.62
0.0102	32.66	-32.66
0.01024	34.2	-34.2
0.01028	18.73	-18.73
0.01032	25.73	-25.73
0.01036	36.77	-36.77
0.0104	19.86	-19.86
0.01044	8.184	-8.184
0.01048	42.63	-42.63
0.01052	28.53	-28.53
0.01056	21.88	-21.88
0.0106	28.59	-28.59
0.01064	35.47	-35.47
0.01068	23.7	-23.7
0.01072	42.32	-42.32
0.01076	40.96	-40.96
0.0108	41.94	-41.94
0.01084	31.22	-31.22
0.01088	24.6	-24.6
0.01092	38.96	-38.96
0.01096	47.23	-47.23
0.011	53.53	-53.53
0.01104	34.34	-34.34
0.01108	35.87	-35.87
0.01112	23.99	-23.99
0.01116	39.6	-39.6
0.0112	38.5	-38.5
0.01124	61.02	-61.02
0.01128	134.6	-134.6
0.01132	80	-80
0.01136	21.97	-21.97
0.0114	34.51	-34.51
0.01144	72.6	-72.6
0.01148	104.8	-104.8
0.01152	78.5	-78.5
0.01156	25.73	-25.73
0.0116	54.31	-54.31
0.01164	83.76	-83.76
0.01168	69.37	-69.37
0.01172	53.21	-53.21
0.01176	56.85	-56.85
0.0118	76.94	-76.94
0.01184	102.3	-102.3
0.01188	57.84	-57.84
0.01192	46.65	-46.65
0.01196	30.55	-30.55
0.012	86.19	-86.19
0.01204	80.81	-80.81
0.01208	61.36	-61.36
0.01212	57.89	-57.89
0.01216	69.77	-69.77
0.0122	65.32	-65.32
0.01224	84.71	-84.71
0.01228	34.37	-34.37
0.01232	75.7	-75.7
0.01236	74.71	-74.71
0.0124	78.21	-78.21
0.01244	46.25	-46.25
0.01248	58.5	-58.5
0.01252	81.07	-81.07
0.01256	95.96	-95.96
0.0126	61.39	-61.39
0.01264	50.18	-50.18
0.01268	62.84	-62.84
0.01272	43.65	-43.65
0.01276	74.02	-74.02
0.0128	65.84	-65.84
0.01284	77.26	-77.26
0.01288	58.24	-58.24
0.01292	47.4	-47.4
0.01296	58.39	-58.39
0.013	54.17	-54.17
0.01304	72.4	-72.4
0.01308	96.25	-96.25
0.01312	70.15	-70.15
0.01316	33.3	-33.3
0.0132	61.74	-61.74
0.01324	51.48	-51.48
0.01328	84.45	-84.45
0.01332	68.53	-68.53
0.01336	77.81	-77.81
0.0134	58.91	-58.91
0.01344	30.87	-30.87
0.01348	21.39	-21.39
0.01352	62.49	-62.49
0.01356	82.32	-82.32
0.0136	80.44	-80.44
0.01364	50.58	-50.58
0.01368	60.24	-60.24
0.01372	65.7	-65.7
0.01376	43.18	-43.18
0.0138	69.86	-69.86
0.01384	76.54	-76.54
0.01388	60.26	-60.26
0.01392	97.23	-97.23
0.01396	55.81	-55.81
0.014	69.69	-69.69
0.01404	25.41	-25.41
0.01408	55.24	-55.24
0.01412	58.93	-58.93
0.01416	47.14	-47.14
0.0142	70.03	-70.03
0.01424	60.21	-60.21
0.01428	65.35	-65.35
0.01432	39.4	-39.4
0.01436	57.43	-57.43
0.0144	43.76	-43.76
0.01444	56.25	-56.25
0.01448	56.8	-56.8
0.01452	44.63	-44.63
0.01456	63.39	-63.39
0.0146	32.32	-32.32
0.01464	21.02	-21.02
0.01468	33.65	-33.65
0.01472	38.01	-38.01
0.01476	52.87	-52.87
0.0148	57.37	-57.37
0.01484	50.7	-50.7
0.01488	44.77	-44.77
0.01492	42.87	-42.87
0.01496	60.06	-60.06
0.015	38.7	-38.7
0.01504	25.99	-25.99
0.01508	26.13	-26.13
0.01512	53.85	-53.85
0.01516	52.63	-52.63
0.0152	43.93	-43.93
0.01524	35.73	-35.73
0.01528	60.67	-60.67
0.01532	37.55	-37.55
0.01536	42	-42
0.0154	32.69	-32.69
0.01544	32.69	-32.69
0.01548	33.3	-33.3
0.01552	59.57	-59.57
0.01556	31.68	-31.68
0.0156	38.59	-38.59
0.01564	44.28	-44.28
0.01568	29.43	-29.43
0.01572	30.03	-30.03
0.01576	49.83	-49.83
0.0158	47.29	-47.29
0.01584	18.36	-18.36
0.01588	51.22	-51.22
0.01592	11.02	-11.02
0.01596	32.09	-32.09
0.016	46.51	-46.51
0.01604	21.83	-21.83
0.01608	35.35	-35.35
0.01612	22.49	-22.49
0.01616	41.62	-41.62
0.0162	23.76	-23.76
0.01624	40.12	-40.12
0.01628	35.76	-35.76
0.01632	29.6	-29.6
0.01636	39.05	-39.05
0.0164	15.35	-15.35
0.01644	28.21	-28.21
0.01648	23.18	-23.18
0.01652	57.08	-57.08
0.01656	40.55	-40.55
0.0166	22.84	-22.84
0.01664	25.81	-25.81
0.01668	26.16	-26.16
0.01672	33.59	-33.59
0.01676	41.45	-41.45
0.0168	13.33	-13.33
0.01684	11.83	-11.83
0.01688	30.52	-30.52
0.01692	24.46	-24.46
0.01696	43.47	-43.47
0.017	13.65	-13.65
0.01704	19.69	-19.69
0.01708	21.1	-21.1
0.01712	41.36	-41.36
0.01716	44.66	-44.66
0.0172	35.35	-35.35
0.01724	34.11	-34.11
0.01728	20.12	-20.12
0.01732	27.11	-27.11
0.01736	24.17	-24.17
0.0174	37.2	-37.2
0.01744	33.94	-33.94
0.01748	22.43	-22.43
0.01752	34.8	-34.8
0.01756	14.66	-14.66
0.0176	44.57	-44.57
0.01764	29.72	-29.72
0.01768	20.7	-20.7
0.01772	20.87	-20.87
0.01776	20.35	-20.35
0.0178	22.23	-22.23
0.01784	28.15	-28.15
0.01788	23.24	-23.24
0.01792	25.81	-25.81
0.01796	20.96	-20.96
0.018	25.38	-25.38
0.01804	36.33	-36.33
0.01808	20.55	-20.55
0.01812	29.28	-29.28
0.01816	31.36	-31.36
0.0182	27.03	-27.03
0.01824	15.18	-15.18
0.01828	18.68	-18.68
0.01832	10.38	-10.38
0.01836	19.02	-19.02
0.0184	39.72	-39.72
0.01844	25.81	-25.81
0.01848	15.21	-15.21
0.01852	9.311	-9.311
0.01856	44.22	-44.22
0.0186	13.44	-13.44
0.01864	29.63	-29.63
0.01868	6.334	-6.334
0.01872	25.12	-25.12
0.01876	35.03	-35.03
0.0188	17.66	-17.66
0.01884	22.32	-22.32
0.01888	25.47	-25.47
0.01892	29.17	-29.17
0.01896	26.74	-26.74
0.019	33.07	-33.07
0.01904	11.57	-11.57
0.01908	8.04	-8.04
0.01912	26.59	-26.59
0.01916	19.51	-19.51
0.0192	13.56	-13.56
0.01924	14.25	-14.25
0.01928	22.52	-22.52
0.01932	21.59	-21.59
0.01936	32.2	-32.2
0.0194	34.22	-34.22
0.01944	29.48	-29.48
0.01948	10.99	-10.99
0.01952	20.99	-20.99
0.01956	32.03	-32.03
0.0196	23.82	-23.82
0.01964	22.55	-22.55
0.01968	10.47	-10.47
0.01972	33.39	-33.39
0.01976	11.28	-11.28
0.0198	37.32	-37.32
0.01984	31.22	-31.22
0.01988	32	-32
0.01992	23.44	-23.44
0.01996	14.17	-14.17
0.02	28.99	-28.99
0.02004	36.36	-36.36
0.02008	17.63	-17.63
0.02012	26.19	-26.19
0.02016	41.1	-41.1
0.0202	29.2	-29.2
0.02024	43.59	-43.59
0.02028	27.29	-27.29
0.02032	23.3	-23.3
0.02036	15.18	-15.18
0.0204	33.73	-33.73
0.02044	26.97	-26.97
0.02048	16.62	-16.62
0.02052	44.4	-44.4
0.02056	13.3	-13.3
0.0206	20.78	-20.78
0.02064	33.67	-33.67
0.02068	28.7	-28.7
0.02072	39.72	-39.72
0.02076	12.14	-12.14
0.0208	19.48	-19.48
0.02084	38.3	-38.3
0.02088	31.77	-31.77
0.02092	32.75	-32.75
0.02096	24.31	-24.31
0.021	21.28	-21.28
0.02104	10.87	-10.87
0.02108	20.84	-20.84
0.02112	69.6	-69.6
0.02116	20.7	-20.7
0.0212	-7.798	7.798
0.02124	5.67	-5.67
0.02128	24.31	-24.31
0.02132	16.71	-16.71
0.02136	6.941	-6.941
0.0214	-48.61	48.61
0.02144	-15.89	15.89
0.02148	19.4	-19.4
0.02152	6.768	-6.768
0.02156	-18.9	18.9
0.0216	-31.99	31.99
0.02164	-20.11	20.11
0.02168	23.36	-23.36
0.02172	44.43	-44.43
0.02176	380.8m	-0.3808
0.0218	-33.87	33.87
0.02184	-33.14	33.14
0.02188	-14.45	14.45
0.02192	6.884	-6.884
0.02196	-19.76	19.76
0.022	-9.214	9.214
0.02204	-34.88	34.88
0.02208	21.71	-21.71
0.02212	-5.168	5.168
0.02216	-6.209	6.209
0.0222	20.44	-20.44
0.02224	18.47	-18.47
0.02228	3.329	-3.329
0.02232	-10.8	10.8
0.02236	6.306	-6.306
0.0224	-16.41	16.41
0.02244	27.61	-27.61
0.02248	7.49	-7.49
0.02252	15.24	-15.24
0.02256	7.173	-7.173
0.0226	207.4m	-0.2074
0.02264	-2.798	2.798
0.02268	-12.36	12.36
0.02272	14.17	-14.17
0.02276	42.95	-42.95
0.0228	28.3	-28.3
0.02284	2.895	-2.895
0.02288	323m	-0.323
0.02292	-17.71	17.71
0.02296	23.01	-23.01
0.023	39.77	-39.77
0.02304	5.901	-5.901
0.02308	14.4	-14.4
0.02312	4.167	-4.167
0.02316	24.72	-24.72
0.0232	22.4	-22.4
0.02324	16.22	-16.22
0.02328	-6.758	6.758
0.02332	-4.532	4.532
0.02336	39.46	-39.46
0.0234	12.35	-12.35
0.02344	18.7	-18.7
0.02348	6.999	-6.999
0.02352	-6.787	6.787
0.02356	2.086	-2.086
0.0236	-2.914	2.914
0.02364	46.85	-46.85
0.02368	13.91	-13.91
0.02372	25.84	-25.84
0.02376	20.67	-20.67
0.0238	14.4	-14.4
0.02384	3.704	-3.704
0.02388	4.282	-4.282
0.02392	6.739	-6.739
0.02396	26.65	-26.65
0.024	56.59	-56.59
0.02404	29.51	-29.51
0.02408	31.39	-31.39
0.02412	2.288	-2.288
0.02416	15.32	-15.32
0.0242	27.55	-27.55
0.02424	11.39	-11.39
0.02428	16.65	-16.65
0.02432	36.88	-36.88
0.02436	19.2	-19.2
0.0244	26.19	-26.19
0.02444	2.115	-2.115
0.02448	14.2	-14.2
0.02452	26.16	-26.16
0.02456	31.65	-31.65
0.0246	35.35	-35.35
0.02464	18.5	-18.5
0.02468	36.62	-36.62
0.02472	9.86	-9.86
0.02476	10.64	-10.64
0.0248	34.6	-34.6
0.02484	19.37	-19.37
0.02488	40.87	-40.87
0.02492	26.16	-26.16
0.02496	38.18	-38.18
0.025	42.98	-42.98
0.02504	6.826	-6.826
0.02508	15.67	-15.67
0.02512	18.91	-18.91
0.02516	33.01	-33.01
0.0252	28.91	-28.91
0.02524	22.09	-22.09
0.02528	31.19	-31.19
0.02532	2.693	-2.693
0.02536	35.76	-35.76
0.0254	25.55	-25.55
0.02544	22.43	-22.43
0.02548	45.78	-45.78
0.02552	9.225	-9.225
0.02556	30.44	-30.44
0.0256	25.96	-25.96
0.02564	35.7	-35.7
0.02568	21.28	-21.28
0.02572	30.81	-30.81
0.02576	43.41	-43.41
0.0258	12.87	-12.87
0.02584	47.32	-47.32
0.02588	28.94	-28.94
0.02592	39.2	-39.2
0.02596	55.76	-55.76
0.026	31.25	-31.25
0.02604	38.53	-38.53
0.02608	18.04	-18.04
0.02612	39.8	-39.8
0.02616	39.57	-39.57
0.0262	43.82	-43.82
0.02624	34.4	-34.4
0.02628	31.88	-31.88
0.02632	31.42	-31.42
0.02636	46.39	-46.39
0.0264	25	-25
0.02644	36.45	-36.45
0.02648	36.77	-36.77
0.02652	35.67	-35.67
0.02656	42.46	-42.46
0.0266	8.126	-8.126
0.02664	45.64	-45.64
0.02668	40.81	-40.81
0.02672	10.03	-10.03
0.02676	23.36	-23.36
0.0268	41.97	-41.97
0.02684	36.97	-36.97
0.02688	18.68	-18.68
0.02692	37.23	-37.23
0.02696	27.66	-27.66
0.027	40.03	-40.03
0.02704	19.2	-19.2
0.02708	37.29	-37.29
0.02712	24.92	-24.92
0.02716	49.08	-49.08
0.0272	39.83	-39.83
0.02724	26.57	-26.57
0.02728	27.78	-27.78
0.02732	30.96	-30.96
0.02736	43.82	-43.82
0.0274	28.01	-28.01
0.02744	47.23	-47.23
0.02748	26.59	-26.59
0.02752	38.85	-38.85
0.02756	37.49	-37.49
0.0276	32.81	-32.81
0.02764	40.76	-40.76
0.02768	18.44	-18.44
0.02772	37.75	-37.75
0.02776	33.59	-33.59
0.0278	17.78	-17.78
0.02784	26.54	-26.54
0.02788	47.26	-47.26
0.02792	46.22	-46.22
0.02796	22.63	-22.63
0.028	40.24	-40.24
0.02804	39.57	-39.57
0.02808	35.76	-35.76
0.02812	44.86	-44.86
0.02816	27.32	-27.32
0.0282	43.44	-43.44
0.02824	9.889	-9.889
0.02828	30.55	-30.55
0.02832	27.63	-27.63
0.02836	40.99	-40.99
0.0284	44.31	-44.31
0.02844	43.85	-43.85
0.02848	47.72	-47.72
0.02852	25.67	-25.67
0.02856	44.14	-44.14
0.0286	47.2	-47.2
0.02864	43.04	-43.04
0.02868	45.64	-45.64
0.02872	35.99	-35.99
0.02876	22.11	-22.11
0.0288	44.74	-44.74
0.02884	45.87	-45.87
0.02888	18.91	-18.91
0.02892	35	-35
0.02896	44.08	-44.08
0.029	30.67	-30.67
0.02904	40.35	-40.35
0.02908	23.53	-23.53
0.02912	31.36	-31.36
0.02916	41.04	-41.04
0.0292	36.02	-36.02
0.02924	45.32	-45.32
0.02928	27.98	-27.98
0.02932	22.98	-22.98
0.02936	24.98	-24.98
0.0294	21.57	-21.57
0.02944	22.61	-22.61
0.02948	39.22	-39.22
0.02952	41.51	-41.51
0.02956	44.4	-44.4
0.0296	36.88	-36.88
0.02964	37.06	-37.06
0.02968	24.95	-24.95
0.02972	31.59	-31.59
0.02976	19.83	-19.83
0.0298	26.83	-26.83
0.02984	35.21	-35.21
0.02988	24.11	-24.11
0.02992	49.83	-49.83
0.02996	38.33	-38.33
0.03	35.03	-35.03
0.03004	20.15	-20.15
0.03008	21.77	-21.77
0.03012	41.02	-41.02
0.03016	48.41	-48.41
0.0302	41.42	-41.42
0.03024	35.99	-35.99
0.03028	21.74	-21.74
0.03032	18.62	-18.62
0.03036	37.35	-37.35
0.0304	37.87	-37.87
0.03044	36.13	-36.13
0.03048	24.25	-24.25
0.03052	40.18	-40.18
0.03056	43.56	-43.56
0.0306	26.59	-26.59
0.03064	36.19	-36.19
0.03068	32.32	-32.32
0.03072	36.39	-36.39
0.03076	36.22	-36.22
0.0308	38.44	-38.44
0.03084	26.42	-26.42
0.03088	38.36	-38.36
0.03092	44.25	-44.25
0.03096	32.81	-32.81
0.031	31.51	-31.51
0.03104	33.7	-33.7
0.03108	52.78	-52.78
0.03112	26.97	-26.97
0.03116	33.91	-33.91
0.0312	38.62	-38.62
0.03124	87.29	-87.29
0.03128	123.2	-123.2
0.03132	41.04	-41.04
0.03136	65	-65
0.0314	83.88	-83.88
0.03144	103.2	-103.2
0.03148	55.67	-55.67
0.03152	25.96	-25.96
0.03156	44.19	-44.19
0.0316	84.45	-84.45
0.03164	85.61	-85.61
0.03168	43.79	-43.79
0.03172	65.47	-65.47
0.03176	69.89	-69.89
0.0318	76.07	-76.07
0.03184	62.63	-62.63
0.03188	19.98	-19.98
0.03192	83.33	-83.33
0.03196	80.87	-80.87
0.032	91.01	-91.01
0.03204	63.79	-63.79
0.03208	35.61	-35.61
0.03212	83.93	-83.93
0.03216	70.44	-70.44
0.0322	59.86	-59.86
0.03224	59.89	-59.89
0.03228	74.63	-74.63
0.03232	66.28	-66.28
0.03236	52.37	-52.37
0.0324	49.95	-49.95
0.03244	67.84	-67.84
0.03248	90.93	-90.93
0.03252	50.32	-50.32
0.03256	54.14	-54.14
0.0326	77.4	-77.4
0.03264	86.51	-86.51
0.03268	70.21	-70.21
0.03272	42.09	-42.09
0.03276	61.22	-61.22
0.0328	45.12	-45.12
0.03284	94.37	-94.37
0.03288	68.7	-68.7
0.03292	40.81	-40.81
0.03296	54.57	-54.57
0.033	81.36	-81.36
0.03304	75.9	-75.9
0.03308	72.26	-72.26
0.03312	55.9	-55.9
0.03316	28.3	-28.3
0.0332	44.31	-44.31
0.03324	48.21	-48.21
0.03328	75.29	-75.29
0.03332	79.45	-79.45
0.03336	90.29	-90.29
0.0334	57.4	-57.4
0.03344	18.91	-18.91
0.03348	35.9	-35.9
0.03352	67.11	-67.11
0.03356	90.41	-90.41
0.0336	65.21	-65.21
0.03364	77.52	-77.52
0.03368	107	-107
0.03372	30.81	-30.81
0.03376	36.77	-36.77
0.0338	57.43	-57.43
0.03384	66.88	-66.88
0.03388	69.97	-69.97
0.03392	64.19	-64.19
0.03396	55.18	-55.18
0.034	53.04	-53.04
0.03404	63.82	-63.82
0.03408	55.67	-55.67
0.03412	34.89	-34.89
0.03416	47.61	-47.61
0.0342	64.02	-64.02
0.03424	48.5	-48.5
0.03428	67.06	-67.06
0.03432	63.39	-63.39
0.03436	15.38	-15.38
0.0344	80.09	-80.09
0.03444	49.31	-49.31
0.03448	61.59	-61.59
0.03452	55.41	-55.41
0.03456	34.43	-34.43
0.0346	65.73	-65.73
0.03464	40.41	-40.41
0.03468	50.64	-50.64
0.03472	38.5	-38.5
0.03476	58.04	-58.04
0.0348	48.47	-48.47
0.03484	39.63	-39.63
0.03488	33.1	-33.1
0.03492	27.03	-27.03
0.03496	46.48	-46.48
0.035	48.91	-48.91
0.03504	62.52	-62.52
0.03508	34.14	-34.14
0.03512	40.21	-40.21
0.03516	14.46	-14.46
0.0352	48.39	-48.39
0.03524	31.77	-31.77
0.03528	48.24	-48.24
0.03532	47.52	-47.52
0.03536	36.33	-36.33
0.0354	50.84	-50.84
0.03544	25.76	-25.76
0.03548	41.85	-41.85
0.03552	40.03	-40.03
0.03556	38.7	-38.7
0.0356	31.39	-31.39
0.03564	34.66	-34.66
0.03568	29.51	-29.51
0.03572	46.1	-46.1
0.03576	14.95	-14.95
0.0358	59.22	-59.22
0.03584	23.44	-23.44
0.03588	45.61	-45.61
0.03592	30.18	-30.18
0.03596	32.46	-32.46
0.036	47.37	-47.37
0.03604	3.82	-3.82
0.03608	42.72	-42.72
0.03612	43.7	-43.7
0.03616	43.93	-43.93
0.0362	23.96	-23.96
0.03624	47.26	-47.26
0.03628	31.65	-31.65
0.03632	11.91	-11.91
0.03636	30.44	-30.44
0.0364	29.8	-29.8
0.03644	33.94	-33.94
0.03648	37.78	-37.78
0.03652	37.84	-37.84
0.03656	31.85	-31.85
0.0366	43.5	-43.5
0.03664	24.6	-24.6
0.03668	25.7	-25.7
0.03672	23.04	-23.04
0.03676	21.07	-21.07
0.0368	7.722	-7.722
0.03684	14.31	-14.31
0.03688	35.03	-35.03
0.03692	24.05	-24.05
0.03696	50.52	-50.52
0.037	8.213	-8.213
0.03704	17.43	-17.43
0.03708	32.84	-32.84
0.03712	28.3	-28.3
0.03716	18.47	-18.47
0.0372	29.17	-29.17
0.03724	25.38	-25.38
0.03728	34.74	-34.74
0.03732	33.3	-33.3
0.03736	21.22	-21.22
0.0374	38.15	-38.15
0.03744	37.35	-37.35
0.03748	37.87	-37.87
0.03752	19.77	-19.77
0.03756	20	-20
0.0376	33.04	-33.04
0.03764	40.61	-40.61
0.03768	41.48	-41.48
0.03772	24.92	-24.92
0.03776	30.21	-30.21
0.0378	31.42	-31.42
0.03784	39.54	-39.54
0.03788	19.34	-19.34
0.03792	33.88	-33.88
0.03796	17.49	-17.49
0.038	23.73	-23.73
0.03804	11.83	-11.83
0.03808	15.73	-15.73
0.03812	9.658	-9.658
0.03816	12.95	-12.95
0.0382	25.26	-25.26
0.03824	16.74	-16.74
0.03828	17.55	-17.55
0.03832	3.936	-3.936
0.03836	22.69	-22.69
0.0384	28.44	-28.44
0.03844	8.704	-8.704
0.03848	31.54	-31.54
0.03852	46.25	-46.25
0.03856	21.16	-21.16
0.0386	9.803	-9.803
0.03864	26.57	-26.57
0.03868	11.25	-11.25
0.03872	24.98	-24.98
0.03876	25.21	-25.21
0.0388	15.38	-15.38
0.03884	27.66	-27.66
0.03888	25.18	-25.18
0.03892	39.34	-39.34
0.03896	16.42	-16.42
0.039	17.49	-17.49
0.03904	4.571	-4.571
0.03908	16.07	-16.07
0.03912	30.76	-30.76
0.03916	35.76	-35.76
0.0392	20.52	-20.52
0.03924	15.47	-15.47
0.03928	21.85	-21.85
0.03932	26.51	-26.51
0.03936	26.25	-26.25
0.0394	6.074	-6.074
0.03944	25.44	-25.44
0.03948	23.01	-23.01
0.03952	22.69	-22.69
0.03956	42.35	-42.35
0.0396	32.52	-32.52
0.03964	41.07	-41.07
0.03968	22.03	-22.03
0.03972	28.41	-28.41
0.03976	24.22	-24.22
0.0398	33.94	-33.94
0.03984	19.05	-19.05
0.03988	25.55	-25.55
0.03992	29.57	-29.57
0.03996	28.91	-28.91
0.04	27.84	-27.84
0.04004	31.57	-31.57
0.04008	30.64	-30.64
0.04012	37.2	-37.2
0.04016	26.88	-26.88
0.0402	26.77	-26.77
0.04024	20.44	-20.44
0.04028	30.73	-30.73
0.04032	28.13	-28.13
0.04036	29.05	-29.05
0.0404	34.83	-34.83
0.04044	34.46	-34.46
0.04048	35.18	-35.18
0.04052	31.33	-31.33
0.04056	32.66	-32.66
0.0406	24.89	-24.89
0.04064	49.95	-49.95
0.04068	28.18	-28.18
0.04072	29.17	-29.17
0.04076	15.9	-15.9
0.0408	30.58	-30.58
0.04084	25.99	-25.99
0.04088	39.54	-39.54
0.04092	33.91	-33.91
0.04096	37.49	-37.49
0.041	23.21	-23.21
0.04104	29.51	-29.51
0.04108	9.485	-9.485
0.04112	30.18	-30.18
0.04116	14.89	-14.89
0.0412	25.44	-25.44
0.04124	9.6	-9.6
0.04128	5.93	-5.93
0.04132	16.83	-16.83
0.04136	12.03	-12.03
0.0414	-3.058	3.058
0.04144	-42.25	42.25
0.04148	3.011	-3.011
0.04152	1.941	-1.941
0.04156	-21.84	21.84
0.0416	-11.38	11.38
0.04164	12.03	-12.03
0.04168	-3.058	3.058
0.04172	-32.8	32.8
0.04176	-34.82	34.82
0.0418	14.02	-14.02
0.04184	6.219	-6.219
0.04188	-11.58	11.58
0.04192	-14.53	14.53
0.04196	10.55	-10.55
0.042	-5.688	5.688
0.04204	-26.96	26.96
0.04208	-23.35	23.35
0.04212	-659.7m	0.6597
0.04216	-28.03	28.03
0.0422	-8.752	8.752
0.04224	-11.35	11.35
0.04228	21.33	-21.33
0.04232	5.901	-5.901
0.04236	-22.74	22.74
0.0424	814.3m	-0.8143
0.04244	24.46	-24.46
0.04248	31.8	-31.8
0.04252	-5.053	5.053
0.04256	18.88	-18.88
0.0426	-4.677	4.677
0.04264	-688.6m	0.6886
0.04268	11.22	-11.22
0.04272	21.85	-21.85
0.04276	-4.85	4.85
0.0428	13.44	-13.44
0.04284	38.53	-38.53
0.04288	16.83	-16.83
0.04292	-25.43	25.43
0.04296	27.06	-27.06
0.043	31.22	-31.22
0.04304	30.12	-30.12
0.04308	5.728	-5.728
0.04312	-7.278	7.278
0.04316	28.7	-28.7
0.0432	9.629	-9.629
0.04324	2.895	-2.895
0.04328	11.94	-11.94
0.04332	34.74	-34.74
0.04336	29.34	-29.34
0.0434	10.93	-10.93
0.04344	13.68	-13.68
0.04348	1.681	-1.681
0.04352	-1.671	1.671
0.04356	7.982	-7.982
0.0436	15.81	-15.81
0.04364	4.976	-4.976
0.04368	23.94	-23.94
0.04372	11.54	-11.54
0.04376	8.386	-8.386
0.0438	41.33	-41.33
0.04384	14.4	-14.4
0.04388	-24.16	24.16
0.04392	27.92	-27.92
0.04396	16.22	-16.22
0.044	34.02	-34.02
0.04404	27.52	-27.52
0.04408	18.62	-18.62
0.04412	25.93	-25.93
0.04416	11.42	-11.42
0.0442	17.09	-17.09
0.04424	-2.943	2.943
0.04428	35.84	-35.84
0.04432	19.08	-19.08
0.04436	7.548	-7.548
0.0444	36.54	-36.54
0.04444	3.329	-3.329
0.04448	21.54	-21.54
0.04452	34.43	-34.43
0.04456	5.872	-5.872
0.0446	18.68	-18.68
0.04464	33.76	-33.76
0.04468	25.47	-25.47
0.04472	30.87	-30.87
0.04476	35.5	-35.5
0.0448	24.48	-24.48
0.04484	17.2	-17.2
0.04488	14.95	-14.95
0.04492	12.17	-12.17
0.04496	23.27	-23.27
0.045	18.3	-18.3
0.04504	40.64	-40.64
0.04508	37	-37
0.04512	20.52	-20.52
0.04516	45.78	-45.78
0.0452	19.34	-19.34
0.04524	9.745	-9.745
0.04528	-2.365	2.365
0.04532	32.55	-32.55
0.04536	29.89	-29.89
0.0454	23.56	-23.56
0.04544	20.55	-20.55
0.04548	45.29	-45.29
0.04552	31.51	-31.51
0.04556	35.24	-35.24
0.0456	20.15	-20.15
0.04564	38.79	-38.79
0.04568	20.21	-20.21
0.04572	19.95	-19.95
0.04576	31.33	-31.33
0.0458	33.24	-33.24
0.04584	32.46	-32.46
0.04588	42.52	-42.52
0.04592	9.051	-9.051
0.04596	36.77	-36.77
0.046	38.7	-38.7
0.04604	23.39	-23.39
0.04608	36.57	-36.57
0.04612	31.19	-31.19
0.04616	37.29	-37.29
0.0462	44.48	-44.48
0.04624	40.78	-40.78
0.04628	26.68	-26.68
0.04632	38.7	-38.7
0.04636	54.31	-54.31
0.0464	28.33	-28.33
0.04644	39.83	-39.83
0.04648	16.48	-16.48
0.04652	46.28	-46.28
0.04656	29.43	-29.43
0.0466	26.05	-26.05
0.04664	30.35	-30.35
0.04668	13.47	-13.47
0.04672	57.26	-57.26
0.04676	33.21	-33.21
0.0468	32.37	-32.37
0.04684	13.39	-13.39
0.04688	45.21	-45.21
0.04692	28.3	-28.3
0.04696	28.76	-28.76
0.047	39.86	-39.86
0.04704	19.83	-19.83
0.04708	54.89	-54.89
0.04712	48.21	-48.21
0.04716	35.9	-35.9
0.0472	36.13	-36.13
0.04724	18.3	-18.3
0.04728	38.33	-38.33
0.04732	37.87	-37.87
0.04736	28.7	-28.7
0.0474	36.94	-36.94
0.04744	15.47	-15.47
0.04748	39.74	-39.74
0.04752	19.11	-19.11
0.04756	31.02	-31.02
0.0476	27.03	-27.03
0.04764	33.56	-33.56
0.04768	30.81	-30.81
0.04772	24.37	-24.37
0.04776	34.54	-34.54
0.0478	44.46	-44.46
0.04784	33.3	-33.3
0.04788	27.09	-27.09
0.04792	35.81	-35.81
0.04796	19.31	-19.31
0.048	33.88	-33.88
0.04804	35.18	-35.18
0.04808	39.17	-39.17
0.04812	19.51	-19.51
0.04816	27.52	-27.52
0.0482	27.95	-27.95
0.04824	44.95	-44.95
0.04828	23.47	-23.47
0.04832	38.18	-38.18
0.04836	47.72	-47.72
0.0484	33.5	-33.5
0.04844	17.4	-17.4
0.04848	26.39	-26.39
0.04852	31.02	-31.02
0.04856	41.13	-41.13
0.0486	41.19	-41.19
0.04864	26.88	-26.88
0.04868	30.84	-30.84
0.04872	43.36	-43.36
0.04876	38.47	-38.47
0.0488	19.48	-19.48
0.04884	48.24	-48.24
0.04888	35.21	-35.21
0.04892	42.43	-42.43
0.04896	35.09	-35.09
0.049	32.06	-32.06
0.04904	52.63	-52.63
0.04908	45.9	-45.9
0.04912	26.02	-26.02
0.04916	43.24	-43.24
0.0492	36.57	-36.57
0.04924	53.1	-53.1
0.04928	48.47	-48.47
0.04932	43.15	-43.15
0.04936	39.14	-39.14
0.0494	37.75	-37.75
0.04944	32.92	-32.92
0.04948	28.99	-28.99
0.04952	34.63	-34.63
0.04956	45.87	-45.87
0.0496	33.7	-33.7
0.04964	39.86	-39.86
0.04968	29.86	-29.86
0.04972	30.87	-30.87
0.04976	40.47	-40.47
0.0498	24.08	-24.08
0.04984	32.17	-32.17
0.04988	31.68	-31.68
0.04992	27.17	-27.17
0.04996	46.04	-46.04
0.05	34.46	-34.46
0.05004	37.29	-37.29
0.05008	37.75	-37.75
0.05012	43.53	-43.53
0.05016	22.75	-22.75
0.0502	28.94	-28.94
0.05024	25.61	-25.61
0.05028	27.37	-27.37
0.05032	34.57	-34.57
0.05036	30.47	-30.47
0.0504	45.35	-45.35
0.05044	26.02	-26.02
0.05048	37.4	-37.4
0.05052	27.43	-27.43
0.05056	39.25	-39.25
0.0506	42.17	-42.17
0.05064	35.15	-35.15
0.05068	27.52	-27.52
0.05072	34.37	-34.37
0.05076	25.78	-25.78
0.0508	28.5	-28.5
0.05084	29.11	-29.11
0.05088	45.24	-45.24
0.05092	45.06	-45.06
0.05096	29.2	-29.2
0.051	38.36	-38.36
0.05104	35.67	-35.67
0.05108	24.05	-24.05
0.05112	26.54	-26.54
0.05116	37.14	-37.14
0.0512	37.29	-37.29
0.05124	42.23	-42.23
0.05128	55.84	-55.84
0.05132	91.54	-91.54
0.05136	114.4	-114.4
0.0514	58.65	-58.65
0.05144	67.58	-67.58
0.05148	85.55	-85.55
0.05152	85.67	-85.67
0.05156	37.55	-37.55
0.0516	80.09	-80.09
0.05164	73.47	-73.47
0.05168	49.08	-49.08
0.05172	55.44	-55.44
0.05176	78.85	-78.85
0.0518	100.9	-100.9
0.05184	39.89	-39.89
0.05188	54.11	-54.11
0.05192	84.74	-84.74
0.05196	92.37	-92.37
0.052	43.01	-43.01
0.05204	54.02	-54.02
0.05208	68.04	-68.04
0.05212	87.66	-87.66
0.05216	69.71	-69.71
0.0522	46.65	-46.65
0.05224	60.29	-60.29
0.05228	85.93	-85.93
0.05232	68.39	-68.39
0.05236	58.07	-58.07
0.0524	68.36	-68.36
0.05244	88.85	-88.85
0.05248	55.84	-55.84
0.05252	29.83	-29.83
0.05256	48.56	-48.56
0.0526	74.11	-74.11
0.05264	90.87	-90.87
0.05268	95.78	-95.78
0.05272	63.13	-63.13
0.05276	68.62	-68.62
0.0528	71.48	-71.48
0.05284	46.36	-46.36
0.05288	37.2	-37.2
0.05292	72.98	-72.98
0.05296	64.57	-64.57
0.053	70.26	-70.26
0.05304	50.99	-50.99
0.05308	83.18	-83.18
0.05312	77.86	-77.86
0.05316	69.8	-69.8
0.0532	55.73	-55.73
0.05324	59.74	-59.74
0.05328	59.11	-59.11
0.05332	63.07	-63.07
0.05336	71.04	-71.04
0.0534	38.82	-38.82
0.05344	55.15	-55.15
0.05348	75.73	-75.73
0.05352	60.52	-60.52
0.05356	63.73	-63.73
0.0536	41.28	-41.28
0.05364	76.54	-76.54
0.05368	59.22	-59.22
0.05372	91.3	-91.3
0.05376	73.44	-73.44
0.0538	65.61	-65.61
0.05384	76.22	-76.22
0.05388	43.21	-43.21
0.05392	56.65	-56.65
0.05396	87.69	-87.69
0.054	65.73	-65.73
0.05404	72.17	-72.17
0.05408	62.37	-62.37
0.05412	55.03	-55.03
0.05416	56.8	-56.8
0.0542	51.82	-51.82
0.05424	63.33	-63.33
0.05428	52.4	-52.4
0.05432	58.99	-58.99
0.05436	48.99	-48.99
0.0544	63.62	-63.62
0.05444	38.39	-38.39
0.05448	30.52	-30.52
0.05452	54.51	-54.51
0.05456	46.28	-46.28
0.0546	51.65	-51.65
0.05464	57.17	-57.17
0.05468	46.54	-46.54
0.05472	43.82	-43.82
0.05476	41.83	-41.83
0.0548	54.31	-54.31
0.05484	36.71	-36.71
0.05488	32.89	-32.89
0.05492	40.67	-40.67
0.05496	17.78	-17.78
0.055	46.3	-46.3
0.05504	44.17	-44.17
0.05508	61.19	-61.19
0.05512	42.23	-42.23
0.05516	41.33	-41.33
0.0552	47.63	-47.63
0.05524	63.44	-63.44
0.05528	36.36	-36.36
0.05532	49.22	-49.22
0.05536	38.85	-38.85
0.0554	37.92	-37.92
0.05544	64.25	-64.25
0.05548	26.83	-26.83
0.05552	27.81	-27.81
0.05556	30.61	-30.61
0.0556	31.22	-31.22
0.05564	51.68	-51.68
0.05568	29.11	-29.11
0.05572	50.73	-50.73
0.05576	32.23	-32.23
0.0558	58.24	-58.24
0.05584	32.03	-32.03
0.05588	29.72	-29.72
0.05592	22.84	-22.84
0.05596	49.66	-49.66
0.056	29.51	-29.51
0.05604	24.72	-24.72
0.05608	57.61	-57.61
0.05612	31.02	-31.02
0.05616	41.3	-41.3
0.0562	35.29	-35.29
0.05624	18.04	-18.04
0.05628	27.87	-27.87
0.05632	21.42	-21.42
0.05636	52.84	-52.84
0.0564	32.52	-32.52
0.05644	46.54	-46.54
0.05648	25.81	-25.81
0.05652	25	-25
0.05656	26.65	-26.65
0.0566	58.91	-58.91
0.05664	33.62	-33.62
0.05668	37.4	-37.4
0.05672	46.71	-46.71
0.05676	22.75	-22.75
0.0568	32	-32
0.05684	16.13	-16.13
0.05688	45.84	-45.84
0.05692	-4.85	4.85
0.05696	32.63	-32.63
0.057	23.13	-23.13
0.05704	8.444	-8.444
0.05708	38.85	-38.85
0.05712	31.91	-31.91
0.05716	37.17	-37.17
0.0572	27.09	-27.09
0.05724	21.77	-21.77
0.05728	26.51	-26.51
0.05732	16.07	-16.07
0.05736	27.09	-27.09
0.0574	29.08	-29.08
0.05744	37.52	-37.52
0.05748	21.07	-21.07
0.05752	21.33	-21.33
0.05756	32.98	-32.98
0.0576	25.73	-25.73
0.05764	34.17	-34.17
0.05768	25.26	-25.26
0.05772	19.54	-19.54
0.05776	11.97	-11.97
0.0578	16.57	-16.57
0.05784	21.77	-21.77
0.05788	19.31	-19.31
0.05792	18.94	-18.94
0.05796	34.77	-34.77
0.058	10.96	-10.96
0.05804	44.4	-44.4
0.05808	23.27	-23.27
0.05812	29.6	-29.6
0.05816	12.52	-12.52
0.0582	28.5	-28.5
0.05824	16.85	-16.85
0.05828	36.97	-36.97
0.05832	22.72	-22.72
0.05836	17.92	-17.92
0.0584	5.872	-5.872
0.05844	27.69	-27.69
0.05848	30.55	-30.55
0.05852	29.02	-29.02
0.05856	33.44	-33.44
0.0586	18.65	-18.65
0.05864	16.8	-16.8
0.05868	17.84	-17.84
0.05872	21.91	-21.91
0.05876	9.398	-9.398
0.0588	32.11	-32.11
0.05884	47.58	-47.58
0.05888	18.94	-18.94
0.05892	17.35	-17.35
0.05896	19.89	-19.89
0.059	18.76	-18.76
0.05904	13.33	-13.33
0.05908	31.04	-31.04
0.05912	26.77	-26.77
0.05916	23.07	-23.07
0.0592	25.67	-25.67
0.05924	32.61	-32.61
0.05928	22.87	-22.87
0.05932	24.69	-24.69
0.05936	28.21	-28.21
0.0594	39.14	-39.14
0.05944	20.24	-20.24
0.05948	22.32	-22.32
0.05952	31.22	-31.22
0.05956	46.56	-46.56
0.0596	11.8	-11.8
0.05964	28.96	-28.96
0.05968	28.7	-28.7
0.05972	17.98	-17.98
0.05976	30.41	-30.41
0.0598	39.6	-39.6
0.05984	11.71	-11.71
0.05988	30.67	-30.67
0.05992	33.62	-33.62
0.05996	16.16	-16.16
0.06	20.96	-20.96
0.06004	33.59	-33.59
0.06008	18.3	-18.3
0.06012	36.68	-36.68
0.06016	19.46	-19.46
0.0602	17.52	-17.52
0.06024	38.33	-38.33
0.06028	20.32	-20.32
0.06032	43.07	-43.07
0.06036	25.35	-25.35
0.0604	17.23	-17.23
0.06044	27.61	-27.61
0.06048	29.37	-29.37
0.06052	35.26	-35.26
0.06056	25.15	-25.15
0.0606	23.73	-23.73
0.06064	23.3	-23.3
0.06068	43.62	-43.62
0.06072	34.46	-34.46
0.06076	25.29	-25.29
0.0608	19.4	-19.4
0.06084	28.59	-28.59
0.06088	50.03	-50.03
0.06092	30.32	-30.32
0.06096	40.44	-40.44
0.061	25	-25
0.06104	24.86	-24.86
0.06108	39.6	-39.6
0.06112	20.26	-20.26
0.06116	35.76	-35.76
0.0612	8.993	-8.993
0.06124	-14.79	14.79
0.06128	30.61	-30.61
0.06132	28.99	-28.99
0.06136	-5.024	5.024
0.0614	-35.4	35.4
0.06144	-14.3	14.3
0.06148	27.2	-27.2
0.06152	-7.48	7.48
0.06156	-21.67	21.67
0.0616	-45.8	45.8
0.06164	31.51	-31.51
0.06168	17	-17
0.06172	-15.31	15.31
0.06176	-21.87	21.87
0.0618	-37.02	37.02
0.06184	27.46	-27.46
0.06188	-17.94	17.94
0.06192	-27.25	27.25
0.06196	-28.06	28.06
0.062	-688.6m	0.6886
0.06204	29.74	-29.74
0.06208	13.85	-13.85
0.06212	-22.1	22.1
0.06216	-21.24	21.24
0.0622	120.7m	-0.1207
0.06224	19.92	-19.92
0.06228	14.28	-14.28
0.06232	11.91	-11.91
0.06236	-17.36	17.36
0.0624	-22.13	22.13
0.06244	-1.064	1.064
0.06248	1.71	-1.71
0.06252	25.87	-25.87
0.06256	4.803	-4.803
0.0626	13.3	-13.3
0.06264	24.2	-24.2
0.06268	9.167	-9.167
0.06272	32.23	-32.23
0.06276	47.37	-47.37
0.0628	-2.885	2.885
0.06284	4.86	-4.86
0.06288	9.889	-9.889
0.06292	5.583	-5.583
0.06296	-6.353	6.353
0.063	3.965	-3.965
0.06304	22.52	-22.52
0.06308	1.595	-1.595
0.06312	20.61	-20.61
0.06316	4.022	-4.022
0.0632	13.44	-13.44
0.06324	-11.73	11.73
0.06328	24.92	-24.92
0.06332	26.48	-26.48
0.06336	29.66	-29.66
0.0634	5.872	-5.872
0.06344	4.138	-4.138
0.06348	-14.73	14.73
0.06352	20.47	-20.47
0.06356	7.057	-7.057
0.0636	-9.099	9.099
0.06364	17.43	-17.43
0.06368	27.06	-27.06
0.06372	9.34	-9.34
0.06376	15.99	-15.99
0.0638	-5.255	5.255
0.06384	21.83	-21.83
0.06388	6.595	-6.595
0.06392	13.5	-13.5
0.06396	-20.31	20.31
0.064	30.38	-30.38
0.06404	11.88	-11.88
0.06408	1.508	-1.508
0.06412	30.44	-30.44
0.06416	23.1	-23.1
0.0642	9.196	-9.196
0.06424	11.28	-11.28
0.06428	2.808	-2.808
0.06432	9.831	-9.831
0.06436	35.64	-35.64
0.0644	10.64	-10.64
0.06444	29.17	-29.17
0.06448	2.086	-2.086
0.06452	19.86	-19.86
0.06456	20.76	-20.76
0.0646	22.29	-22.29
0.06464	23.21	-23.21
0.06468	33.04	-33.04
0.06472	27.49	-27.49
0.06476	1.161	-1.161
0.0648	24.89	-24.89
0.06484	31.62	-31.62
0.06488	14.72	-14.72
0.06492	33.94	-33.94
0.06496	14.25	-14.25
0.065	30.35	-30.35
0.06504	17.43	-17.43
0.06508	3.213	-3.213
0.06512	20.61	-20.61
0.06516	38.82	-38.82
0.0652	30.26	-30.26
0.06524	33.21	-33.21
0.06528	36.33	-36.33
0.06532	34.98	-34.98
0.06536	37.37	-37.37
0.0654	18.85	-18.85
0.06544	33.99	-33.99
0.06548	34.83	-34.83
0.06552	43.62	-43.62
0.06556	16.59	-16.59
0.0656	34.69	-34.69
0.06564	29.08	-29.08
0.06568	36.59	-36.59
0.06572	23.04	-23.04
0.06576	24.22	-24.22
0.0658	36.33	-36.33
0.06584	55.12	-55.12
0.06588	18.85	-18.85
0.06592	29.02	-29.02
0.06596	43.13	-43.13
0.066	29.48	-29.48
0.06604	19.57	-19.57
0.06608	37.58	-37.58
0.06612	20.96	-20.96
0.06616	40.41	-40.41
0.0662	49.19	-49.19
0.06624	6.074	-6.074
0.06628	43.3	-43.3
0.06632	32.58	-32.58
0.06636	43.41	-43.41
0.0664	22.06	-22.06
0.06644	34.57	-34.57
0.06648	35.52	-35.52
0.06652	28.07	-28.07
0.06656	29.28	-29.28
0.0666	12.95	-12.95
0.06664	24.4	-24.4
0.06668	46.62	-46.62
0.06672	35.03	-35.03
0.06676	40.64	-40.64
0.0668	30.38	-30.38
0.06684	50.67	-50.67
0.06688	35.76	-35.76
0.06692	33.76	-33.76
0.06696	36.57	-36.57
0.067	50.41	-50.41
0.06704	37.84	-37.84
0.06708	14.46	-14.46
0.06712	39.43	-39.43
0.06716	35.32	-35.32
0.0672	38.56	-38.56
0.06724	40.55	-40.55
0.06728	41.59	-41.59
0.06732	44.17	-44.17
0.06736	14.83	-14.83
0.0674	6.045	-6.045
0.06744	37.78	-37.78
0.06748	48.27	-48.27
0.06752	33.65	-33.65
0.06756	19.22	-19.22
0.0676	32.66	-32.66
0.06764	31.33	-31.33
0.06768	47.14	-47.14
0.06772	33.01	-33.01
0.06776	28.47	-28.47
0.0678	20.99	-20.99
0.06784	16.51	-16.51
0.06788	26.68	-26.68
0.06792	24.92	-24.92
0.06796	35.44	-35.44
0.068	36.28	-36.28
0.06804	26.57	-26.57
0.06808	16.1	-16.1
0.06812	33.59	-33.59
0.06816	34.54	-34.54
0.0682	44.77	-44.77
0.06824	32.87	-32.87
0.06828	38.1	-38.1
0.06832	44.34	-44.34
0.06836	33.79	-33.79
0.0684	37.29	-37.29
0.06844	34.83	-34.83
0.06848	38.24	-38.24
0.06852	34.2	-34.2
0.06856	38.62	-38.62
0.0686	36.91	-36.91
0.06864	34.28	-34.28
0.06868	54.69	-54.69
0.06872	38.3	-38.3
0.06876	24.43	-24.43
0.0688	32.17	-32.17
0.06884	40.24	-40.24
0.06888	35.32	-35.32
0.06892	34.98	-34.98
0.06896	41.68	-41.68
0.069	44.69	-44.69
0.06904	49.25	-49.25
0.06908	27.84	-27.84
0.06912	41.74	-41.74
0.06916	23.33	-23.33
0.0692	50.81	-50.81
0.06924	26.77	-26.77
0.06928	21.91	-21.91
0.06932	19.37	-19.37
0.06936	45.9	-45.9
0.0694	41.85	-41.85
0.06944	30.67	-30.67
0.06948	27.87	-27.87
0.06952	44.25	-44.25
0.06956	34.17	-34.17
0.0696	19.89	-19.89
0.06964	34.86	-34.86
0.06968	28.39	-28.39
0.06972	30.29	-30.29
0.06976	42.32	-42.32
0.0698	43.13	-43.13
0.06984	48.79	-48.79
0.06988	15.55	-15.55
0.06992	39.11	-39.11
0.06996	31.25	-31.25
0.07	44.02	-44.02
0.07004	34.69	-34.69
0.07008	40.55	-40.55
0.07012	27.09	-27.09
0.07016	35.21	-35.21
0.0702	37.03	-37.03
0.07024	29.8	-29.8
0.07028	27.17	-27.17
0.07032	30.52	-30.52
0.07036	26.05	-26.05
0.0704	41.36	-41.36
0.07044	26.28	-26.28
0.07048	19.17	-19.17
0.07052	42.49	-42.49
0.07056	33.65	-33.65
0.0706	45.61	-45.61
0.07064	29.4	-29.4
0.07068	27.58	-27.58
0.07072	43.93	-43.93
0.07076	55.78	-55.78
0.0708	38.24	-38.24
0.07084	26.16	-26.16
0.07088	34.74	-34.74
0.07092	28.04	-28.04
0.07096	39.14	-39.14
0.071	37.98	-37.98
0.07104	36.71	-36.71
0.07108	28.15	-28.15
0.07112	21.07	-21.07
0.07116	36.97	-36.97
0.0712	10.58	-10.58
0.07124	82.86	-82.86
0.07128	107.3	-107.3
0.07132	43.27	-43.27
0.07136	46.36	-46.36
0.0714	54.14	-54.14
0.07144	102.9	-102.9
0.07148	98.9	-98.9
0.07152	58.82	-58.82
0.07156	22.26	-22.26
0.0716	70.15	-70.15
0.07164	89.8	-89.8
0.07168	68.07	-68.07
0.07172	32.58	-32.58
0.07176	63.91	-63.91
0.0718	94.74	-94.74
0.07184	63.04	-63.04
0.07188	26.85	-26.85
0.07192	57.84	-57.84
0.07196	84.48	-84.48
0.072	112.9	-112.9
0.07204	71.91	-71.91
0.07208	41.62	-41.62
0.07212	58.59	-58.59
0.07216	67.69	-67.69
0.0722	73.41	-73.41
0.07224	46.8	-46.8
0.07228	71.91	-71.91
0.07232	66.62	-66.62
0.07236	81.71	-81.71
0.0724	49.86	-49.86
0.07244	66.77	-66.77
0.07248	42.89	-42.89
0.07252	55.61	-55.61
0.07256	60.67	-60.67
0.0726	59.34	-59.34
0.07264	57.49	-57.49
0.07268	89.28	-89.28
0.07272	74.45	-74.45
0.07276	80.75	-80.75
0.0728	31.39	-31.39
0.07284	43.13	-43.13
0.07288	82.06	-82.06
0.07292	62.17	-62.17
0.07296	73.47	-73.47
0.073	77.66	-77.66
0.07304	37	-37
0.07308	16.33	-16.33
0.07312	62.98	-62.98
0.07316	73.91	-73.91
0.0732	95.9	-95.9
0.07324	57.2	-57.2
0.07328	44.6	-44.6
0.07332	68.76	-68.76
0.07336	55.26	-55.26
0.0734	63.5	-63.5
0.07344	63.96	-63.96
0.07348	58.13	-58.13
0.07352	54.92	-54.92
0.07356	38.5	-38.5
0.0736	53.1	-53.1
0.07364	71.54	-71.54
0.07368	82.43	-82.43
0.07372	69.02	-69.02
0.07376	73.44	-73.44
0.0738	58.53	-58.53
0.07384	36.91	-36.91
0.07388	52.32	-52.32
0.07392	40.84	-40.84
0.07396	35.61	-35.61
0.074	57.2	-57.2
0.07404	50.87	-50.87
0.07408	70.38	-70.38
0.07412	54.34	-54.34
0.07416	62.75	-62.75
0.0742	46.71	-46.71
0.07424	58.13	-58.13
0.07428	50.76	-50.76
0.07432	48.59	-48.59
0.07436	17.52	-17.52
0.0744	67.26	-67.26
0.07444	58.39	-58.39
0.07448	38.7	-38.7
0.07452	55.58	-55.58
0.07456	62.23	-62.23
0.0746	53.79	-53.79
0.07464	41.85	-41.85
0.07468	27.75	-27.75
0.07472	30.15	-30.15
0.07476	42.23	-42.23
0.0748	60.35	-60.35
0.07484	58.15	-58.15
0.07488	56.19	-56.19
0.07492	40.47	-40.47
0.07496	55.47	-55.47
0.075	40.87	-40.87
0.07504	45	-45
0.07508	45.32	-45.32
0.07512	28.24	-28.24
0.07516	25.12	-25.12
0.0752	51.19	-51.19
0.07524	41.8	-41.8
0.07528	32.63	-32.63
0.07532	51.39	-51.39
0.07536	27.95	-27.95
0.0754	20.32	-20.32
0.07544	55.67	-55.67
0.07548	42.84	-42.84
0.07552	54.28	-54.28
0.07556	68.88	-68.88
0.0756	18.68	-18.68
0.07564	39.72	-39.72
0.07568	27.37	-27.37
0.07572	44.95	-44.95
0.07576	23.79	-23.79
0.0758	48.88	-48.88
0.07584	35.24	-35.24
0.07588	49.51	-49.51
0.07592	41.59	-41.59
0.07596	22.29	-22.29
0.076	29.69	-29.69
0.07604	27.98	-27.98
0.07608	56.16	-56.16
0.07612	57.37	-57.37
0.07616	25.87	-25.87
0.0762	38.65	-38.65
0.07624	22.11	-22.11
0.07628	37.98	-37.98
0.07632	41.48	-41.48
0.07636	63.21	-63.21
0.0764	40.76	-40.76
0.07644	24.72	-24.72
0.07648	50.73	-50.73
0.07652	36.71	-36.71
0.07656	20.03	-20.03
0.0766	58.33	-58.33
0.07664	28.73	-28.73
0.07668	20.55	-20.55
0.07672	51.91	-51.91
0.07676	16.83	-16.83
0.0768	27.46	-27.46
0.07684	57.66	-57.66
0.07688	33.24	-33.24
0.07692	33.85	-33.85
0.07696	23.99	-23.99
0.077	26.28	-26.28
0.07704	44.92	-44.92
0.07708	51.45	-51.45
0.07712	30.76	-30.76
0.07716	29.63	-29.63
0.0772	18.04	-18.04
0.07724	26.59	-26.59
0.07728	29.46	-29.46
0.07732	26.02	-26.02
0.07736	45.84	-45.84
0.0774	4.485	-4.485
0.07744	30.41	-30.41
0.07748	21.65	-21.65
0.07752	11.07	-11.07
0.07756	39.72	-39.72
0.0776	31.39	-31.39
0.07764	28.88	-28.88
0.07768	24.22	-24.22
0.07772	45.06	-45.06
0.07776	27.87	-27.87
0.0778	8.56	-8.56
0.07784	13.99	-13.99
0.07788	29.89	-29.89
0.07792	22.95	-22.95
0.07796	19.37	-19.37
0.078	19.74	-19.74
0.07804	13.73	-13.73
0.07808	23.94	-23.94
0.07812	3.04	-3.04
0.07816	23.07	-23.07
0.0782	30.47	-30.47
0.07824	23.44	-23.44
0.07828	22.81	-22.81
0.07832	20.67	-20.67
0.07836	36.33	-36.33
0.0784	22.35	-22.35
0.07844	18.79	-18.79
0.07848	47.78	-47.78
0.07852	24.86	-24.86
0.07856	7.722	-7.722
0.0786	14.48	-14.48
0.07864	29.2	-29.2
0.07868	20.12	-20.12
0.07872	12.14	-12.14
0.07876	24.6	-24.6
0.0788	35.32	-35.32
0.07884	21.57	-21.57
0.07888	34.92	-34.92
0.07892	31.16	-31.16
0.07896	16.02	-16.02
0.079	35.99	-35.99
0.07904	18.88	-18.88
0.07908	18.13	-18.13
0.07912	24.54	-24.54
0.07916	20.81	-20.81
0.0792	31.42	-31.42
0.07924	31.28	-31.28
0.07928	27.4	-27.4
0.07932	17.58	-17.58
0.07936	22.78	-22.78
0.0794	29.22	-29.22
0.07944	21.36	-21.36
0.07948	20.41	-20.41
0.07952	21.71	-21.71
0.07956	31.33	-31.33
0.0796	27.26	-27.26
0.07964	40.7	-40.7
0.07968	10.18	-10.18
0.07972	26.91	-26.91
0.07976	39.57	-39.57
0.0798	30	-30
0.07984	32.63	-32.63
0.07988	48.18	-48.18
0.07992	24.63	-24.63
[truncated: 98,001 more rows]

## Sheet: Sheet1
		100	2500
time	data	butfilt1	Stress
0.452	8159	8446.83	3.37873
0.45204	8232	8433.72	3.37349
0.45208	8321	8419.95	3.36798
0.45212	8491	8405.52	3.36221
0.45216	8723	8390.4	3.35616
0.4522	9003	8374.59	3.34984
0.45224	9273	8358.07	3.34323
0.45228	9519	8340.83	3.33633
0.45232	9741	8322.85	3.32914
0.45236	9981	8304.12	3.32165
0.4524	10140	8284.62	3.31385
0.45244	10260	8264.35	3.30574
0.45248	10290	8243.29	3.29731
0.45252	10250	8221.43	3.28857
0.45256	10160	8198.76	3.2795
0.4526	10060	8175.27	3.27011
0.45264	9856	8150.96	3.26038
0.45268	9656	8125.81	3.25033
0.45272	9476	8099.83	3.23993
0.45276	9358	8073	3.2292
0.4528	9320	8045.31	3.21812
0.45284	9371	8016.77	3.20671
0.45288	9504	7987.37	3.19495
0.45292	9686	7957.09	3.18284
0.45296	9859	7925.95	3.17038
0.453	9961	7893.94	3.15758
0.45304	10030	7861.05	3.14442
0.45308	10090	7827.29	3.13092
0.45312	10140	7792.65	3.11706
0.45316	10140	7757.13	3.10285
0.4532	10110	7720.74	3.0883
0.45324	10080	7683.48	3.07339
0.45328	10030	7645.35	3.05814
0.45332	9977	7606.36	3.04254
0.45336	9877	7566.5	3.0266
0.4534	9727	7525.8	3.01032
0.45344	9535	7484.25	2.9937
0.45348	9330	7441.86	2.97674
0.45352	9162	7398.64	2.95946
0.45356	8958	7354.6	2.94184
0.4536	8769	7309.76	2.9239
0.45364	8590	7264.11	2.90564
0.45368	8457	7217.68	2.88707
0.45372	8414	7170.48	2.86819
0.45376	8405	7122.51	2.849
0.4538	8470	7073.79	2.82952
0.45384	8504	7024.34	2.80974
0.45388	8627	6974.17	2.78967
0.45392	8731	6923.29	2.76931
0.45396	8794	6871.71	2.74869
0.454	8854	6819.47	2.72779
0.45404	8811	6766.56	2.70663
0.45408	8697	6713.02	2.68521
0.45412	8513	6658.85	2.66354
0.45416	8248	6604.08	2.64163
0.4542	7998	6548.73	2.61949
0.45424	7693	6492.81	2.59713
0.45428	7460	6436.36	2.57454
0.45432	7163	6379.38	2.55175
0.45436	6900	6321.91	2.52876
0.4544	6653	6263.96	2.50558
0.45444	6380	6205.56	2.48222
0.45448	6150	6146.73	2.45869
0.45452	5895	6087.49	2.435
0.45456	5715	6027.87	2.41115
0.4546	5562	5967.89	2.38715
0.45464	5419	5907.57	2.36303
0.45468	5315	5846.93	2.33877
0.45472	5259	5786	2.3144
0.45476	5231	5724.8	2.28992
0.4548	5285	5663.35	2.26534
0.45484	5327	5601.67	2.24067
0.45488	5373	5539.78	2.21591
0.45492	5428	5477.71	2.19108
0.45496	5435	5415.48	2.16619
0.455	5366	5353.1	2.14124
0.45504	5297	5290.61	2.11624
0.45508	5148	5228.01	2.0912
0.45512	4979	5165.34	2.06613
0.45516	4820	5102.61	2.04104
0.4552	4621	5039.84	2.01594
0.45524	4464	4977.06	1.99082
0.45528	4296	4914.29	1.96572
0.45532	4175	4851.54	1.94062
0.45536	4039	4788.85	1.91554
0.4554	3931	4726.22	1.89049
0.45544	3805	4663.68	1.86547
0.45548	3694	4601.24	1.8405
0.45552	3637	4538.94	1.81557
0.45556	3507	4476.78	1.79071
0.4556	3395	4414.78	1.76591
0.45564	3276	4352.97	1.74119
0.45568	3162	4291.36	1.71654
0.45572	3084	4229.97	1.69199
0.45576	3099	4168.81	1.66752
0.4558	3129	4107.9	1.64316
0.45584	3172	4047.26	1.61891
0.45588	3179	3986.91	1.59476
0.45592	3194	3926.85	1.57074
0.45596	3192	3867.11	1.54684
0.456	3162	3807.69	1.52308
0.45604	3052	3748.62	1.49945
0.45608	2912	3689.9	1.47596
0.45612	2775	3631.55	1.45262
0.45616	2610	3573.59	1.42944
0.4562	2437	3516.03	1.40641
0.45624	2274	3458.87	1.38355
0.45628	2169	3402.14	1.36086
0.45632	2108	3345.84	1.33834
0.45636	2052	3289.99	1.316
0.4564	2031	3234.59	1.29384
0.45644	2073	3179.67	1.27187
0.45648	2026	3125.22	1.25009
0.45652	2007	3071.25	1.2285
0.45656	1951	3017.78	1.20711
0.4566	1897	2964.82	1.18593
0.45664	1866	2912.37	1.16495
0.45668	1877	2860.44	1.14418
0.45672	1868	2809.04	1.12361
0.45676	1837	2758.17	1.10327
0.4568	1848	2707.84	1.08314
0.45684	1870	2658.06	1.06323
0.45688	1834	2608.84	1.04354
0.45692	1767	2560.17	1.02407
0.45696	1642	2512.07	1.00483
0.457	1506	2464.54	0.985817
0.45704	1361	2417.59	0.967035
0.45708	1226	2371.21	0.948483
0.45712	1087	2325.41	0.930165
0.45716	995.3	2280.2	0.912081
0.4572	948.3	2235.58	0.894232
0.45724	867.5	2191.55	0.87662
0.45728	821.2	2148.11	0.859245
0.45732	859.6	2105.27	0.842107
0.45736	937.2	2063.02	0.825207
0.4574	1003	2021.36	0.808545
0.45744	1152	1980.3	0.792122
0.45748	1289	1939.84	0.775936
0.45752	1397	1899.97	0.759987
0.45756	1446	1860.69	0.744276
0.4576	1433	1822	0.728801
0.45764	1429	1783.9	0.713561
0.45768	1384	1746.39	0.698557
0.45772	1393	1709.47	0.683788
0.45776	1384	1673.13	0.669252
0.4578	1360	1637.37	0.654948
0.45784	1348	1602.19	0.640877
0.45788	1268	1567.59	0.627037
0.45792	1200	1533.57	0.613427
0.45796	1127	1500.11	0.600046
0.458	1063	1467.23	0.586892
0.45804	964	1434.92	0.573966
0.45808	884.6	1403.16	0.561265
0.45812	775.1	1371.97	0.548789
0.45816	690.2	1341.34	0.536535
0.4582	600.7	1311.26	0.524504
0.45824	570.9	1281.73	0.512692
0.45828	594.1	1252.75	0.501098
0.45832	654.6	1224.3	0.489721
0.45836	754.8	1196.4	0.478559
0.4584	855.9	1169.02	0.46761
0.45844	943.9	1142.18	0.456871
0.45848	1012	1115.85	0.44634
0.45852	1045	1090.04	0.436017
0.45856	1046	1064.74	0.425897
0.4586	1007	1039.95	0.41598
0.45864	932.6	1015.66	0.406263
0.45868	855.6	991.859	0.396744
0.45872	750.8	968.55	0.38742
0.45876	702.7	945.725	0.37829
0.4588	629.5	923.378	0.369351
0.45884	603.2	901.504	0.360602
0.45888	594.8	880.097	0.352039
0.45892	585	859.15	0.34366
0.45896	593.2	838.658	0.335463
0.459	637.4	818.615	0.327446
0.45904	647.1	799.015	0.319606
0.45908	655.1	779.85	0.31194
0.45912	672.3	761.116	0.304446
0.45916	708.4	742.805	0.297122
0.4592	729.4	724.911	0.289964
0.45924	757	707.428	0.282971
0.45928	840	690.349	0.27614
0.45932	917.4	673.667	0.269467
0.45936	1004	657.378	0.262951
0.4594	1055	641.473	0.256589
0.45944	1095	625.947	0.250379
0.45948	1064	610.795	0.244318
0.45952	980.8	596.009	0.238404
0.45956	884.7	581.586	0.232634
0.4596	779.6	567.518	0.227007
0.45964	651.1	553.802	0.221521
0.45968	532.8	540.43	0.216172
0.45972	435.6	527.4	0.21096
0.45976	360.6	514.704	0.205882
0.4598	301.4	502.339	0.200935
0.45984	283.9	490.298	0.196119
0.45988	278.4	478.576	0.19143
0.45992	297.9	467.167	0.186867
0.45996	293.6	456.067	0.182427
0.46	314.4	445.27	0.178108
0.46004	324.3	434.769	0.173908
0.46008	316.9	424.56	0.169824
0.46012	301.3	414.636	0.165854
0.46016	287.9	404.991	0.161996
0.4602	292.3	395.62	0.158248
0.46024	305.5	386.517	0.154607
0.46028	354.4	377.676	0.15107
0.46032	376.8	369.09	0.147636
0.46036	436.3	360.754	0.144302
0.4604	469.1	352.663	0.141065
0.46044	495.1	344.809	0.137924
0.46048	486.8	337.187	0.134875
0.46052	470.2	329.791	0.131916
0.46056	453.7	322.616	0.129046
0.4606	422.6	315.655	0.126262
0.46064	397	308.903	0.123561
0.46068	371.8	302.355	0.120942
0.46072	379.1	296.004	0.118401
0.46076	432.4	289.845	0.115938
0.4608	497.6	283.872	0.113549
0.46084	590	278.081	0.111232
0.46088	678.9	272.465	0.108986
0.46092	782.6	267.02	0.106808
0.46096	865.8	261.74	0.104696
0.461	927.4	256.621	0.102648
0.46104	959.1	251.657	0.100663
0.46108	916.6	246.844	0.0987378
0.46112	846.2	242.179	0.0968717
0.46116	751.8	237.657	0.0950629
0.4612	629.3	233.275	0.0933101
0.46124	540.7	229.029	0.0916117
0.46128	458.5	224.916	0.0899666
0.46132	418.6	220.933	0.0883733
0.46136	381.3	217.077	0.0868309
0.4614	365.4	213.345	0.0853379
0.46144	348.9	209.733	0.0838934
0.46148	354.5	206.24	0.0824961
0.46152	298	202.862	0.0811449
0.46156	260.9	199.597	0.0798388
0.4616	203.9	196.442	0.0785767
0.46164	224.4	193.394	0.0773575
0.46168	143.4	190.45	0.0761801
0.46172	101.5	187.609	0.0750436
0.46176	122.1	184.867	0.0739467
0.4618	152.6	182.221	0.0728886
0.46184	191.1	179.67	0.071868
0.46188	188.8	177.21	0.0708838
0.46192	250	174.838	0.0699351
0.46196	312.6	172.552	0.0690207
0.462	337.1	170.349	0.0681396
0.46204	311.2	168.226	0.0672906
0.46208	304.9	166.182	0.0664728
0.46212	284	164.213	0.0656851
0.46216	252.7	162.317	0.0649267
0.4622	205.4	160.491	0.0641964
0.46224	216.8	158.734	0.0634934
0.46228	290.5	157.042	0.0628167
0.46232	329.6	155.414	0.0621655
0.46236	409.9	153.847	0.0615387
0.4624	517.8	152.339	0.0609355
0.46244	600.5	150.888	0.0603551
0.46248	650.7	149.492	0.0597967
0.46252	663.9	148.149	0.0592596
0.46256	697.7	146.858	0.0587432
0.4626	660.8	145.617	0.0582469
0.46264	594.3	144.426	0.0577703
0.46268	495.5	143.282	0.0573129
0.46272	454.9	142.186	0.0568745
0.46276	381.2	141.137	0.0564548
0.4628	312.9	140.134	0.0560536
0.46284	278.7	139.177	0.0556707
0.46288	212.2	138.265	0.055306
0.46292	113	137.398	0.0549594
0.46296	92.65	136.577	0.0546307
0.463	-0.1207	135.8	0.05432
0.46304	-25.38	135.067	0.0540269
0.46308	-97.4	134.379	0.0537515
0.46312	-80.64	133.734	0.0534935
0.46316	-108.7	133.132	0.0532527
0.4632	-85.93	132.572	0.053029
0.46324	-92.46	132.055	0.052822
0.46328	-116.6	131.579	0.0526315
0.46332	-60.18	131.143	0.052457
0.46336	-28.62	130.746	0.0522983
0.4634	0.3706	130.387	0.0521549
0.46344	30.17	130.066	0.0520264
0.46348	30.8	129.781	0.0519123
0.46352	60.25	129.53	0.0518122
0.46356	48.52	129.314	0.0517255
0.4636	52.88	129.13	0.0516518
0.46364	61.44	128.977	0.0515906
0.46368	120.9	128.853	0.0515414
0.46372	95.66	128.759	0.0515035
0.46376	180.1	128.691	0.0514765
0.4638	176.6	128.65	0.0514599
0.46384	159	128.633	0.051453
0.46388	186.5	128.639	0.0514555
0.46392	182.7	128.667	0.0514667
0.46396	140.4	128.715	0.0514861
0.464	136.6	128.783	0.0515133
0.46404	66.58	128.869	0.0515477
0.46408	70.46	128.972	0.0515889
0.46412	64.65	129.091	0.0516363
0.46416	48.03	129.224	0.0516894
0.4642	47.02	129.369	0.0517477
0.46424	103.6	129.527	0.0518106
0.46428	98.29	129.694	0.0518776
0.46432	109.4	129.87	0.0519481
0.46436	116.6	130.054	0.0520216
0.4644	83.06	130.244	0.0520975
0.46444	107.6	130.438	0.0521752
0.46448	84.04	130.635	0.0522542
0.46452	65.98	130.834	0.0523338
0.46456	13.35	131.034	0.0524135
0.4646	-26.45	131.232	0.0524926
0.46464	-13.33	131.427	0.0525707
0.46468	-5.67	131.617	0.0526469
0.46472	-4.803	131.802	0.0527206
0.46476	1.324	131.978	0.0527913
0.4648	33.29	132.145	0.052858
0.46484	59.62	132.301	0.0529202
0.46488	89.21	132.443	0.0529771
0.46492	107.9	132.57	0.0530279
0.46496	100.8	132.68	0.0530718
0.465	170	132.77	0.0531081
0.46504	369.6	132.84	0.0531361
0.46508	528.2	132.887	0.0531549
0.46512	623	132.91	0.0531639
0.46516	811.5	132.906	0.0531623
0.4652	916.5	132.874	0.0531497
0.46524	909.7	132.814	0.0531255
0.46528	847.8	132.723	0.0530894
0.46532	732.1	132.603	0.0530412
0.46536	634.1	132.452	0.0529806
0.4654	570.7	132.27	0.0529078
0.46544	466.7	132.057	0.0528228
0.46548	452.8	131.814	0.0527256
0.46552	364.4	131.541	0.0526164
0.46556	273.3	131.239	0.0524956
0.4656	191.1	130.908	0.0523632
0.46564	109.1	130.549	0.0522197
0.46568	63.52	130.163	0.0520654
0.46572	70.08	129.751	0.0519004
0.46576	117.5	129.313	0.0517252
0.4658	101.5	128.85	0.05154
0.46584	113.3	128.363	0.051345
0.46588	99.07	127.851	0.0511406
0.46592	76.93	127.317	0.050927
0.46596	103.6	126.761	0.0507044
0.466	116.3	126.183	0.0504732
0.46604	56.24	125.584	0.0502336
0.46608	69.62	124.965	0.0499859
0.46612	36.38	124.326	0.0497302
0.46616	-14.48	123.667	0.0494668
0.4662	-43.13	122.99	0.049196
0.46624	-37.29	122.295	0.0489179
0.46628	-86.85	121.582	0.0486327
0.46632	-13.16	120.851	0.0483405
0.46636	57.48	120.104	0.0480414
0.4664	79.79	119.339	0.0477357
0.46644	105.3	118.558	0.0474232
0.46648	73.2	117.76	0.0471042
0.46652	53.64	116.946	0.0467786
0.46656	79.65	116.116	0.0464465
0.4666	56.55	115.27	0.0461081
0.46664	-1.71	114.408	0.0457633
0.46668	10.28	113.53	0.0454121
0.46672	18.49	112.637	0.0450547
0.46676	24.13	111.727	0.044691
0.4668	56.64	110.802	0.0443209
0.46684	126.3	109.861	0.0439446
0.46688	179.3	108.905	0.0435618
0.46692	296.2	107.932	0.0431727
0.46696	431.2	106.943	0.0427772
0.467	526	105.938	0.0423753
0.46704	549.3	104.918	0.0419671
0.46708	489.9	103.882	0.0415527
0.46712	448.3	102.831	0.0411324
0.46716	359.9	101.766	0.0407063
0.4672	253.9	100.687	0.0402749
0.46724	192.3	99.5958	0.0398383
0.46728	127.6	98.4927	0.0393971
0.46732	116.7	97.379	0.0389516
0.46736	57.97	96.2555	0.0385022
0.4674	36.47	95.1233	0.0380493
0.46744	-9.34	93.9833	0.0375933
0.46748	-21.97	92.8366	0.0371346
0.46752	5.313	91.6841	0.0366736
0.46756	48.98	90.5266	0.0362106
0.4676	58.17	89.3651	0.035746
0.46764	41.87	88.2003	0.0352801
0.46768	27.36	87.0331	0.0348132
0.46772	8.954	85.8642	0.0343457
0.46776	-46.91	84.6946	0.0338778
0.4678	-107.7	83.5248	0.0334099
0.46784	-83.12	82.3556	0.0329423
0.46788	-37.52	81.1877	0.0324751
0.46792	-15.29	80.0215	0.0320086
0.46796	48.32	78.8576	0.031543
0.468	83.92	77.6965	0.0310786
0.46804	67.48	76.5386	0.0306155
0.46808	60.6	75.3845	0.0301538
0.46812	75.05	74.2344	0.0296938
0.46816	40.75	73.089	0.0292356
0.4682	59.65	71.9487	0.0287795
0.46824	53.69	70.8138	0.0283255
0.46828	22.42	69.6848	0.0278739
0.46832	-22.75	68.5623	0.0274249
0.46836	-31.13	67.4464	0.0269786
0.4684	-57.11	66.3377	0.0265351
0.46844	-85.67	65.2364	0.0260946
0.46848	-17.23	64.1428	0.0256571
0.46852	47.31	63.0572	0.0252229
0.46856	101.8	61.9798	0.0247919
0.4686	136.1	60.9107	0.0243643
0.46864	101	59.8502	0.0239401
0.46868	52.68	58.7984	0.0235194
0.46872	14.56	57.7557	0.0231023
0.46876	-31.13	56.7223	0.0226889
0.4688	5.197	55.6983	0.0222793
0.46884	9.33	54.684	0.0218736
0.46888	-10.53	53.6795	0.0214718
0.46892	3.405	52.685	0.021074
0.46896	51.03	51.7007	0.0206803
0.469	22.22	50.7266	0.0202906
0.46904	26.61	49.7629	0.0199051
0.46908	114.8	48.8095	0.0195238
0.46912	140.5	47.8668	0.0191467
0.46916	118.3	46.9347	0.0187739
0.4692	102.4	46.0134	0.0184054
0.46924	79.01	45.1031	0.0180413
0.46928	-0.2363	44.204	0.0176816
0.46932	-18.73	43.3163	0.0173265
0.46936	-89.37	42.4402	0.0169761
0.4694	-112.1	41.5758	0.0166303
0.46944	-104.4	40.7232	0.0162893
0.46948	-69.8	39.8826	0.015953
0.46952	-23.73	39.0539	0.0156215
0.46956	41.44	38.237	0.0152948
0.4696	75.92	37.432	0.0149728
0.46964	101.1	36.6388	0.0146555
0.46968	170.9	35.8573	0.0143429
0.46972	145.4	35.0875	0.014035
0.46976	106.1	34.3294	0.0137318
0.4698	64.85	33.5831	0.0134332
0.46984	14.45	32.8487	0.0131395
0.46988	-60.58	32.1263	0.0128505
0.46992	-92.75	31.416	0.0125664
0.46996	-121.5	30.7179	0.0122872
0.47	-103.1	30.0319	0.0120128
0.47004	-37.75	29.358	0.0117432
0.47008	-10.84	28.6962	0.0114785
0.47012	27.8	28.0463	0.0112185
0.47016	101.9	27.4082	0.0109633
0.4702	125.1	26.7817	0.0107127
0.47024	96.18	26.1668	0.0104667
0.47028	95.05	25.5635	0.0102254
0.47032	61.21	24.9715	0.00998862
0.47036	8.492	24.3911	0.00975642
0.4704	-36.28	23.822	0.0095288
0.47044	-73.07	23.2643	0.00930574
0.47048	-93.64	22.7181	0.00908723
0.47052	-73.1	22.1831	0.00887324
0.47056	-74.86	21.6593	0.00866374
0.4706	-42.81	21.1466	0.00845865
0.47064	25.69	20.6448	0.0082579
0.47068	90.95	20.1536	0.00806142
0.47072	105.5	19.6728	0.00786912
0.47076	164.6	19.2023	0.00768094
0.4708	139.8	18.742	0.0074968
0.47084	100.8	18.2917	0.00731669
0.47088	71.44	17.8514	0.00714056
0.47092	6.873	17.4211	0.00696843
0.47096	-76.56	17.0007	0.00680028
0.471	-100.4	16.5903	0.00663611
0.47104	-106.8	16.1898	0.00647591
0.47108	-84.19	15.7991	0.00631964
0.47112	-62.49	15.4182	0.00616727
0.47116	-4.687	15.0468	0.00601871
0.4712	56.09	14.6847	0.00587389
0.47124	95.31	14.3319	0.00573275
0.47128	109.7	13.988	0.0055952
0.47132	133.3	13.653	0.00546118
0.47136	109.7	13.3266	0.00533065
0.4714	89.59	13.0089	0.00520358
0.47144	7.047	12.6999	0.00507994
0.47148	-2.924	12.3994	0.00495974
0.47152	-55.9	12.1074	0.00484297
0.47156	-114.9	11.8241	0.00472963
0.4716	-136.1	11.5492	0.00461968
0.47164	-112.1	11.2828	0.00451311
0.47168	-65.55	11.0246	0.00440983
0.47172	-64.4	10.7745	0.0043098
0.47176	-65.18	10.5322	0.0042129
0.4718	-18.47	10.2976	0.00411904
0.47184	52.02	10.0703	0.00402811
0.47188	36.12	9.84998	0.00393999
0.47192	7.307	9.63643	0.00385457
0.47196	-42.35	9.42935	0.00377174
0.472	-70.23	9.22845	0.00369138
0.47204	-52.29	9.03344	0.00361338
0.47208	-87.34	8.844	0.0035376
0.47212	-100.6	8.65976	0.00346391
0.47216	-89.19	8.48035	0.00339214
0.4722	-77.52	8.30532	0.00332213
0.47224	8.607	8.13421	0.00325368
0.47228	47.77	7.96653	0.00318661
0.47232	75.25	7.80178	0.00312071
0.47236	112.7	7.63948	0.00305579
0.4724	154.3	7.47918	0.00299167
0.47244	166	7.32047	0.00292819
0.47248	168.7	7.16297	0.00286519
0.47252	179.9	7.00641	0.00280256
0.47256	119.8	6.85054	0.00274021
0.4726	105.4	6.69518	0.00267807
0.47264	61.7	6.54023	0.00261609
0.47268	-1.392	6.38557	0.00255423
0.47272	-32.58	6.23116	0.00249246
0.47276	-24.6	6.07691	0.00243077
0.4728	4.359	5.92276	0.0023691
0.47284	-17.78	5.76862	0.00230745
0.47288	-14.86	5.61439	0.00224576
0.47292	-17.84	5.45998	0.00218399
0.47296	9.908	5.30527	0.00212211
0.473	52.71	5.15017	0.00206007
0.47304	58.61	4.99455	0.00199782
0.47308	116.1	4.83834	0.00193533
0.47312	134.9	4.68145	0.00187258
0.47316	116.2	4.52387	0.00180955
0.4732	104.3	4.36562	0.00174625
0.47324	109.8	4.20676	0.0016827
0.47328	108.2	4.0474	0.00161896
0.47332	147.8	3.88768	0.00155507
0.47336	116.1	3.7278	0.00149112
0.4734	52.05	3.568	0.0014272
0.47344	-14.2	3.40857	0.00136343
0.47348	-17.58	3.24981	0.00129992
0.47352	-91.65	3.09201	0.0012368
0.47356	-106.1	2.93545	0.00117418
0.4736	-28.07	2.78041	0.00111216
0.47364	-55.93	2.62709	0.00105084
0.47368	-75.67	2.47571	0.000990284
0.47372	-45.12	2.32644	0.000930574
0.47376	-53.07	2.17942	0.000871768
0.4738	-80.7	2.03479	0.000813917
0.47384	-24.54	1.89266	0.000757064
0.47388	-7.664	1.7531	0.00070124
0.47392	42.28	1.61618	0.000646474
0.47396	99.33	1.48198	0.000592792
0.474	101.3	1.35058	0.000540231
0.47404	50.31	1.22209	0.000488834
0.47408	22.77	1.09666	0.000438663
0.47412	-19.08	0.974457	0.000389783
0.47416	-66.85	0.855661	0.000342264
0.4742	-25.21	0.740437	0.000296175
0.47424	16.09	0.62894	0.000251576
0.47428	-10.44	0.521314	0.000208526
0.47432	54.16	0.417702	0.000167081
0.47436	49.39	0.318252	0.000127301
0.4744	-32.75	0.223124	8.92497e-05
0.47444	-55.73	0.132487	5.29947e-05
0.47448	-22.11	0.046502	1.86008e-05
0.47452	-30.24	-0.0346803	-1.38721e-05
0.47456	57.68	-0.110922	-4.43688e-05
0.4746	84.76	-0.182085	-7.28341e-05
0.47464	39.42	-0.248017	-9.92069e-05
0.47468	-46.74	-0.308545	-0.000123418
0.47472	-91.42	-0.363487	-0.000145395
0.47476	-129.4	-0.412674	-0.00016507
0.4748	-102.5	-0.45597	-0.000182388
0.47484	-63.99	-0.493279	-0.000197312
0.47488	-25.99	-0.524546	-0.000209818
0.47492	53.84	-0.549736	-0.000219894
0.47496	40.37	-0.568822	-0.000227529
0.475	10.8	-0.581769	-0.000232708
0.47504	-2.837	-0.588529	-0.000235411
0.47508	-5.554	-0.589048	-0.000235619
0.47512	-9.831	-0.58327	-0.000233308
0.47516	44.42	-0.571141	-0.000228456
0.4752	34.42	-0.552602	-0.000221041
0.47524	40.28	-0.527585	-0.000211034
0.47528	5.573	-0.496008	-0.000198403
0.47532	-35.47	-0.457778	-0.000183111
0.47536	-45.67	-0.4128	-0.00016512
0.4754	-52.03	-0.360991	-0.000144396
0.47544	-66.39	-0.302283	-0.000120913
0.47548	-44.54	-0.236629	-9.46515e-05
0.47552	-11.94	-0.164003	-6.56012e-05
0.47556	-26.33	-0.084396	-3.37584e-05
0.4756	-4.774	0.00219128	8.76511e-07
0.47564	59.79	0.0957526	3.8301e-05
0.47568	26.38	0.196285	7.85138e-05
0.47572	11.53	0.303795	0.000121518
0.47576	3.723	0.418301	0.000167321
0.4758	16.64	0.53983	0.000215932
0.47584	-7.288	0.668408	0.000267363
0.47588	23.09	0.804068	0.000321627
0.47592	-20.7	0.946842	0.000378737
0.47596	-75.21	1.09676	0.000438706
0.476	-15	1.25386	0.000501543
0.47604	-29.08	1.41813	0.000567251
0.47608	-14.22	1.58957	0.000635829
0.47612	8.174	1.76817	0.000707268
0.47616	25.02	1.95391	0.000781563
0.4762	4.85	2.14676	0.000858704
0.47624	44.24	2.34671	0.000938685
0.47628	65.48	2.55376	0.00102151
0.47632	9.214	2.76792	0.00110717
0.47636	-24.77	2.9892	0.00119568
0.4764	-10.87	3.21764	0.00128705
0.47644	-75.61	3.45324	0.0013813
0.47648	-65.87	3.69603	0.00147841
0.47652	-141.9	3.94599	0.00157839
0.47656	-102.1	4.20305	0.00168122
0.4766	9.272	4.46712	0.00178685
0.47664	39.21	4.73809	0.00189524
0.47668	60.95	5.01581	0.00200633
0.47672	86.7	5.30017	0.00212007
0.47676	53.35	5.59105	0.00223642
0.4768	24.24	5.88838	0.00235535
0.47684	31.76	6.19211	0.00247684
0.47688	50.23	6.50218	0.00260087
0.47692	36.93	6.81857	0.00272743
0.47696	62.22	7.14124	0.0028565
0.477	0.7464	7.4702	0.00298808
0.47704	-69.95	7.80545	0.00312218
0.47708	-106	8.14699	0.00325879
0.47712	-140.4	8.49479	0.00339791
0.47716	-100.5	8.84878	0.00353951
0.4772	-2.23	9.20884	0.00368354
0.47724	77.59	9.57484	0.00382993
0.47728	132.4	9.9466	0.00397864
0.47732	167.9	10.324	0.0041296
0.47736	124.5	10.7069	0.00428277
0.4774	64.96	11.0954	0.00443815
0.47744	-9.167	11.4893	0.00459573
0.47748	-56.74	11.8888	0.00475552
0.47752	-90.55	12.2938	0.00491752
0.47756	-85.35	12.7043	0.00508174
0.4776	-43.65	13.1204	0.00524815
0.47764	-66.02	13.5418	0.00541672
0.47768	-71.02	13.9685	0.00558742
0.47772	-43.07	14.4005	0.00576018
0.47776	-19.14	14.8374	0.00593495
0.4778	11.5	15.2791	0.00611164
0.47784	70.57	15.7254	0.00629017
0.47788	98.75	16.1762	0.00647047
0.47792	82.1	16.6312	0.00665247
0.47796	82.94	17.0902	0.00683609
0.478	53.06	17.5532	0.00702129
0.47804	-53.1	18.0201	0.00720803
0.47808	-86.91	18.4907	0.00739627
0.47812	-96.01	18.9649	0.00758594
0.47816	-79.54	19.4425	0.007777
0.4782	-20.26	19.9234	0.00796936
0.47824	81.55	20.4073	0.00816293
0.47828	96.18	20.894	0.00835761
0.47832	164.2	21.3833	0.00855331
0.47836	161.8	21.8749	0.00874995
0.4784	105.9	22.3687	0.00894747
0.47844	88.03	22.8646	0.00914584
0.47848	41.81	23.3626	0.00934503
0.47852	-28.62	23.8625	0.00954501
0.47856	-84.17	24.3645	0.00974578
0.4786	-68.07	24.8683	0.00994732
0.47864	-120.1	25.374	0.0101496
0.47868	-98.96	25.8813	0.0103525
0.47872	-29.6	26.3902	0.0105561
0.47876	-12.78	26.9003	0.0107601
0.4788	43.61	27.4114	0.0109646
0.47884	132.5	27.9234	0.0111693
0.47888	142.7	28.4358	0.0113743
0.47892	112.5	28.9486	0.0115794
0.47896	89.65	29.4614	0.0117846
0.479	-2.78	29.9742	0.0119897
0.47904	-70.09	30.4869	0.0121948
0.47908	-92.58	30.9992	0.0123997
0.47912	-125.3	31.511	0.0126044
0.47916	-142.9	32.0221	0.0128088
0.4792	-55.15	32.5322	0.0130129
0.47924	14.91	33.0409	0.0132163
0.47928	54.5	33.5478	0.0134191
0.47932	99.33	34.0526	0.0136211
0.47936	108.4	34.5549	0.013822
0.4794	78	35.0544	0.0140218
0.47944	99.24	35.5506	0.0142202
0.47948	34.07	36.0433	0.0144173
0.47952	-15.73	36.5322	0.0146129
0.47956	-43.41	37.0169	0.0148067
0.4796	-78.12	37.4971	0.0149989
0.47964	-81.28	37.9726	0.015189
0.47968	-54.08	38.4429	0.0153771
0.47972	-0.9299	38.9075	0.015563
0.47976	34.85	39.366	0.0157464
0.4798	112.8	39.8179	0.0159272
0.47984	150.8	40.2628	0.0161051
0.47988	126.6	40.7002	0.0162801
0.47992	88.84	41.1296	0.0164518
0.47996	24.99	41.5506	0.0166203
0.48	-34.31	41.963	0.0167852
0.48004	-60.03	42.3662	0.0169465
0.48008	-80.49	42.7599	0.017104
0.48012	-89.66	43.1437	0.0172575
0.48016	-79.74	43.5169	0.0174068
0.4802	10.98	43.8792	0.0175517
0.48024	18.35	44.2299	0.017692
0.48028	63.12	44.5684	0.0178273
0.48032	120.8	44.894	0.0179576
0.48036	150.7	45.2063	0.0180825
0.4804	199.7	45.5046	0.0182018
0.48044	247.8	45.7884	0.0183153
0.48048	236	46.0571	0.0184229
0.48052	223.4	46.3105	0.0185242
0.48056	182.3	46.5482	0.0186193
0.4806	101.4	46.7699	0.018708
0.48064	92.02	46.9754	0.0187902
0.48068	103.8	47.1645	0.0188658
0.48072	112.8	47.3372	0.0189349
0.48076	129.6	47.4931	0.0189973
0.4808	178.7	47.6324	0.0190529
0.48084	187.8	47.7548	0.0191019
0.48088	151	47.8603	0.0191441
0.48092	154.3	47.949	0.0191796
0.48096	106.3	48.021	0.0192084
0.481	60.63	48.0763	0.0192305
0.48104	73.81	48.1151	0.019246
0.48108	44.73	48.1375	0.019255
0.48112	36.03	48.1438	0.0192575
0.48116	49.16	48.1339	0.0192536
0.4812	29.24	48.1081	0.0192433
0.48124	18.84	48.0666	0.0192266
0.48128	42.51	48.0094	0.0192038
0.48132	48.81	47.9367	0.0191747
0.48136	58.9	47.8487	0.0191395
0.4814	85.48	47.7454	0.0190981
0.48144	134.1	47.6269	0.0190508
0.48148	81.79	47.4936	0.0189974
0.48152	98.49	47.3454	0.0189382
0.48156	87.97	47.1827	0.0188731
0.4816	93.66	47.0056	0.0188022
0.48164	65.72	46.8143	0.0187257
0.48168	54.96	46.6092	0.0186437
0.48172	87.48	46.3904	0.0185562
0.48176	105.7	46.1583	0.0184633
0.4818	65.25	45.913	0.0183652
0.48184	55.28	45.655	0.018262
0.48188	62.45	45.3845	0.0181538
0.48192	67.88	45.1018	0.0180407
0.48196	43.58	44.8072	0.0179229
0.482	45.75	44.5011	0.0178004
0.48204	60.17	44.1838	0.0176735
0.48208	79.91	43.8557	0.0175423
0.48212	75.31	43.517	0.0174068
0.48216	-15	43.1681	0.0172672
0.4822	-62.26	42.8094	0.0171237
0.48224	-7.866	42.4411	0.0169765
0.48228	58.55	42.0637	0.0168255
0.48232	-3.415	41.6774	0.0166709
0.48236	9.879	41.2824	0.0165129
0.4824	62.22	40.879	0.0163516
0.48244	85.11	40.4675	0.016187
0.48248	88.26	40.0482	0.0160193
0.48252	131.8	39.6213	0.0158485
0.48256	54.62	39.1872	0.0156749
0.4826	33.55	38.7461	0.0154985
0.48264	23.17	38.2985	0.0153194
0.48268	-50.64	37.8445	0.0151378
0.48272	-28.18	37.3846	0.0149539
0.48276	12.34	36.9191	0.0147676
0.4828	2.769	36.4482	0.0145793
0.48284	11.15	35.9722	0.0143889
0.48288	58.23	35.4914	0.0141966
0.48292	14.39	35.006	0.0140024
0.48296	3.983	34.5162	0.0138065
0.483	45.08	34.0222	0.0136089
0.48304	53.66	33.5244	0.0134098
0.48308	49.85	33.0229	0.0132092
0.48312	73.37	32.518	0.0130072
0.48316	-11.36	32.01	0.012804
0.4832	-77.86	31.499	0.0125996
0.48324	-58.65	30.9853	0.0123941
0.48328	10.89	30.4691	0.0121877
0.48332	-41.02	29.9507	0.0119803
0.48336	22.08	29.4301	0.011772
0.4834	90.05	28.9074	0.011563
0.48344	70.6	28.3829	0.0113532
0.48348	69.1	27.8567	0.0111427
0.48352	91.64	27.3289	0.0109316
0.48356	17.65	26.7998	0.0107199
0.4836	-14.05	26.2694	0.0105078
0.48364	-18.88	25.7381	0.0102953
0.48368	-31.19	25.2061	0.0100824
0.48372	49.68	24.6734	0.00986935
0.48376	44.16	24.1402	0.00965609
0.4838	-10.84	23.6068	0.00944272
0.48384	-17.69	23.0733	0.0092293
0.48388	3.868	22.5397	0.00901589
0.48392	44.44	22.0064	0.00880255
0.48396	15.83	21.4733	0.00858933
0.484	68.92	20.9407	0.00837629
0.48404	27.88	20.4087	0.00816348
0.48408	25.23	19.8774	0.00795097
0.48412	19.71	19.347	0.00773881
0.48416	-42.46	18.8177	0.00752708
0.4842	-73.21	18.2896	0.00731583
0.48424	-58.99	17.7628	0.00710512
0.48428	-24.54	17.2375	0.00689498
0.48432	32.51	16.7136	0.00668546
0.48436	66.93	16.1914	0.00647656
0.4844	77.07	15.6708	0.00626833
0.48444	101.2	15.152	0.00606078
0.48448	57.68	14.635	0.00585398
0.48452	15.34	14.1199	0.00564797
0.48456	-30.76	13.607	0.0054428
0.4846	-24.98	13.0963	0.00523854
0.48464	-23.53	12.5881	0.00503524
0.48468	-38.36	12.0824	0.00483296
0.48472	-42.75	11.5793	0.00463174
0.48476	-23.27	11.079	0.0044316
0.4848	23.95	10.5815	0.00423259
0.48484	-18.04	10.0868	0.00403472
0.48488	-4.687	9.59504	0.00383801
0.48492	7.885	9.10624	0.0036425
0.48496	68.26	8.62045	0.00344818
0.485	90.77	8.13773	0.00325509
0.48504	58.2	7.65814	0.00306326
0.48508	36.47	7.18178	0.00287271
0.48512	-37.69	6.70875	0.0026835
0.48516	-60.38	6.23918	0.00249567
0.4852	-73.3	5.77317	0.00230927
0.48524	-56.02	5.31082	0.00212433
0.48528	-44.19	4.85216	0.00194087
0.48532	-35.24	4.39725	0.0017589
0.48536	33.92	3.94609	0.00157844
0.4854	94.73	3.49868	0.00139947
0.48544	102	3.05506	0.00122202
0.48548	70.28	2.61525	0.0010461
0.48552	51.24	2.17934	0.000871737
0.48556	48.98	1.74744	0.000698975
0.4856	36.5	1.31967	0.000527867
0.48564	41.9	0.896177	0.000358471
0.48568	36.93	0.477126	0.000190851
0.48572	-0.9588	0.0626944	2.50778e-05
0.48576	-53.44	-0.346933	-0.000138773
0.4858	-52.72	-0.751573	-0.000300629
0.48584	-72.78	-1.15106	-0.000460422
0.48588	-62.37	-1.54523	-0.000618093
0.48592	-32.55	-1.93398	-0.000773592
0.48596	10.14	-2.3172	-0.000926878
0.486	54.88	-2.69478	-0.00107791
0.48604	66.84	-3.06665	-0.00122666
0.48608	33.75	-3.43267	-0.00137307
0.48612	-23.3	-3.79272	-0.00151709
0.48616	-68.04	-4.14664	-0.00165866
0.4862	-89.92	-4.4943	-0.00179772
0.48624	-91.56	-4.83559	-0.00193423
0.48628	-106.3	-5.1704	-0.00206816
0.48632	-65.73	-5.49869	-0.00219948
0.48636	-35.41	-5.82045	-0.00232818
0.4864	-23.27	-6.13566	-0.00245427
0.48644	-49.43	-6.44436	-0.00257775
0.48648	-68.53	-6.74658	-0.00269863
0.48652	-65.76	-7.04236	-0.00281694
0.48656	10.51	-7.33177	-0.00293271
0.4866	10.8	-7.61491	-0.00304596
0.48664	68.87	-7.89184	-0.00315674
0.48668	78.29	-8.16264	-0.00326506
0.48672	-14.6	-8.42736	-0.00337095
0.48676	-44.69	-8.68603	-0.00347441
0.4868	-54.98	-8.93868	-0.00357547
0.48684	-42.92	-9.18533	-0.00367413
0.48688	-31.39	-9.42603	-0.00377041
0.48692	36.96	-9.66084	-0.00386434
0.48696	27.16	-9.88983	-0.00395593
0.487	16.7	-10.1131	-0.00404522
0.48704	33.06	-10.3305	-0.00413221
0.48708	-51.88	-10.5423	-0.00421693
0.48712	-62.84	-10.7484	-0.00429937
0.48716	-31.68	-10.9489	-0.00437954
0.4872	-66.02	-11.1437	-0.00445748
0.48724	-69.6	-11.333	-0.0045332
0.48728	-49.6	-11.5168	-0.00460673
0.48732	-32.55	-11.6953	-0.00467811
0.48736	-59.97	-11.8685	-0.00474739
0.4874	8.81	-12.0365	-0.00481462
0.48744	-8.704	-12.1996	-0.00487985
0.48748	-8.647	-12.3578	-0.00494313
0.48752	26.01	-12.5113	-0.00500453
0.48756	27.42	-12.6602	-0.00506409
0.4876	25.2	-12.8046	-0.00512186
0.48764	-5.005	-12.9447	-0.00517787
0.48768	-13.44	-13.0804	-0.00523217
0.48772	-49.83	-13.212	-0.00528479
0.48776	-55.78	-13.3394	-0.00533576
0.4878	-81.33	-13.4628	-0.00538513
0.48784	-92.95	-13.5824	-0.00543295
0.48788	-42.2	-13.6981	-0.00547926
0.48792	-31.85	-13.8103	-0.00552414
0.48796	-33.82	-13.9191	-0.00556766
0.488	6.613	-14.0247	-0.00560989
0.48804	-6.855	-14.1273	-0.00565092
0.48808	-33.94	-14.227	-0.00569082
0.48812	-24.83	-14.3242	-0.00572966
0.48816	-15.87	-14.4188	-0.00576754
0.4882	-13.68	-14.5113	-0.00580451
0.48824	36.76	-14.6017	-0.00584068
0.48828	36.41	-14.6903	-0.00587611
0.48832	47.31	-14.7772	-0.00591087
0.48836	21.21	-14.8626	-0.00594503
0.4884	16.93	-14.9466	-0.00597865
0.48844	-21.83	-15.0294	-0.00601177
0.48848	-49.95	-15.1111	-0.00604444
0.48852	-47.4	-15.1918	-0.0060767
0.48856	-53.88	-15.2715	-0.00610861
0.4886	-34.89	-15.3506	-0.00614023
0.48864	-6.652	-15.429	-0.00617161
0.48868	-12.75	-15.507	-0.00620281
0.48872	-32.09	-15.5847	-0.00623389
0.48876	22.05	-15.6623	-0.00626493
0.4888	43.29	-15.74	-0.00629598
0.48884	49.7	-15.8178	-0.00632711
0.48888	57.19	-15.8959	-0.00635835
0.48892	28.12	-15.9744	-0.00638975
0.48896	3.434	-16.0533	-0.00642134
0.489	-13.82	-16.1328	-0.00645313
0.48904	-44.34	-16.2129	-0.00648516
0.48908	-76.74	-16.2936	-0.00651744
0.48912	-65.15	-16.375	-0.00654999
0.48916	-53.27	-16.4571	-0.00658284
0.4892	-24.11	-16.5401	-0.00661604
0.48924	4.012	-16.624	-0.00664962
0.48928	35.57	-16.7091	-0.00668362
0.48932	8.694	-16.7953	-0.0067181
0.48936	3.116	-16.8827	-0.00675308
0.4894	-8.502	-16.9715	-0.0067886
0.48944	-6.421	-17.0617	-0.00682468
0.48948	-5.583	-17.1534	-0.00686136
0.48952	-7.462	-17.2466	-0.00689864
0.48956	-27	-17.3414	-0.00693657
0.4896	-19.86	-17.4379	-0.00697515
0.48964	-20.96	-17.536	-0.00701441
0.48968	-33.07	-17.6359	-0.00705438
0.48972	-9.571	-17.7377	-0.00709507
0.48976	10.86	-17.8413	-0.00713651
0.4898	28.75	-17.9468	-0.00717873
0.48984	48.49	-18.0544	-0.00722175
0.48988	39.04	-18.1639	-0.00726556
0.48992	36.44	-18.2755	-0.00731018
0.48996	9.532	-18.389	-0.00735561
0.49	-13.94	-18.5045	-0.00740181
0.49004	-26.39	-18.622	-0.00744878
0.49008	-32.35	-18.7413	-0.0074965
0.49012	-18.47	-18.8624	-0.00754495
0.49016	-7.201	-18.9852	-0.0075941
0.4902	-0.4675	-19.1098	-0.00764394
0.49024	-4.398	-19.2361	-0.00769445
0.49028	-15.24	-19.364	-0.0077456
0.49032	-27.09	-19.4934	-0.00779738
0.49036	-10.84	-19.6244	-0.00784975
0.4904	6.844	-19.7567	-0.00790269
0.49044	13.23	-19.8904	-0.00795618
0.49048	7.856	-20.0254	-0.00801017
0.49052	5.082	-20.1616	-0.00806465
0.49056	-0.4386	-20.2989	-0.00811956
0.4906	-10.15	-20.4372	-0.00817487
0.49064	-22.63	-20.5763	-0.00823052
0.49068	-25.41	-20.7162	-0.00828647
0.49072	-27.35	-20.8567	-0.00834268
0.49076	-29.69	-20.9977	-0.00839909
0.4908	-29.6	-21.1391	-0.00845565
0.49084	-22.23	-21.2808	-0.00851233
0.49088	-36.45	-21.4227	-0.00856907
0.49092	-46.56	-21.5646	-0.00862584
0.49096	-17.14	-21.7065	-0.00868259
0.491	-28.88	-21.8482	-0.00873929
0.49104	-16.16	-21.9897	-0.00879589
0.49108	3.868	-22.1309	-0.00885236
0.49112	2.336	-22.2717	-0.00890867
0.49116	6.873	-22.4119	-0.00896475
0.4912	-2.433	-22.5515	-0.00902058
0.49124	28.72	-22.6902	-0.0090761
0.49128	25.6	-22.8281	-0.00913125
0.49132	31.53	-22.9649	-0.00918598
0.49136	8.318	-23.1005	-0.00924021
0.4914	10.43	-23.2346	-0.00929386
0.49144	3.954	-23.3671	-0.00934685
0.49148	-17	-23.4977	-0.0093991
0.49152	-31.31	-23.6263	-0.00945051
0.49156	-106.2	-23.7525	-0.00950098
0.4916	-61.82	-23.8761	-0.00955044
0.49164	-70.73	-23.997	-0.00959879
0.49168	-79.69	-24.1149	-0.00964597
0.49172	-37.61	-24.2298	-0.0096919
0.49176	-40.58	-24.3413	-0.00973654
0.4918	-19.22	-24.4495	-0.00977981
0.49184	-35.18	-24.5542	-0.00982167
0.49188	-50	-24.6552	-0.00986207
0.49192	-37.72	-24.7524	-0.00990095
0.49196	-4.832	-24.8457	-0.00993827
0.492	-31.71	-24.9349	-0.00997397
0.49204	-25.15	-25.02	-0.010008
0.49208	-48.1	-25.1009	-0.0100404
0.49212	-99.92	-25.1773	-0.0100709
0.49216	-89.51	-25.2493	-0.0100997
0.4922	-76.65	-25.3167	-0.0101267
0.49224	-34.17	-25.3794	-0.0101518
0.49228	-62.72	-25.4375	-0.010175
0.49232	-47.11	-25.4909	-0.0101964
0.49236	-11.1	-25.5396	-0.0102158
0.4924	-55.26	-25.5835	-0.0102334
0.49244	53.14	-25.6227	-0.0102491
0.49248	6.035	-25.6572	-0.0102629
0.49252	-9.253	-25.6868	-0.0102747
0.49256	-47.03	-25.7117	-0.0102847
0.4926	-37.35	-25.7316	-0.0102927
0.49264	-78.01	-25.7467	-0.0102987
0.49268	-78.67	-25.7568	-0.0103027
0.49272	-83.79	-25.7619	-0.0103048
0.49276	-53.47	-25.7621	-0.0103048
0.4928	24.99	-25.7573	-0.0103029
0.49284	7.712	-25.7476	-0.010299
0.49288	1.874	-25.733	-0.0102932
0.49292	3.954	-25.7135	-0.0102854
0.49296	-6.103	-25.6891	-0.0102756
0.493	-8.993	-25.6597	-0.0102639
0.49304	12.39	-25.6255	-0.0102502
0.49308	-38.24	-25.5862	-0.0102345
0.49312	-72.55	-25.5419	-0.0102168
0.49316	-95.21	-25.4925	-0.010197
0.4932	-109	-25.4381	-0.0101752
0.49324	-84.6	-25.3786	-0.0101514
0.49328	-38.56	-25.314	-0.0101256
0.49332	-4.109	-25.2444	-0.0100978
0.49336	-37.09	-25.1699	-0.010068
0.4934	22.19	-25.0905	-0.0100362
0.49344	29.5	-25.0063	-0.0100025
0.49348	18.78	-24.9173	-0.00996691
0.49352	31.93	-24.8235	-0.00992941
0.49356	23.2	-24.725	-0.00988999
0.4936	-45.32	-24.6217	-0.00984866
0.49364	-105.8	-24.5135	-0.00980541
0.49368	-107.1	-24.4006	-0.00976023
0.49372	-91.25	-24.2828	-0.00971312
0.49376	-110.9	-24.1602	-0.00966409
0.4938	-45.5	-24.0329	-0.00961317
0.49384	-1.797	-23.901	-0.0095604
0.49388	-23.79	-23.7645	-0.0095058
0.49392	18.81	-23.6236	-0.00944943
0.49396	-7.201	-23.4783	-0.00939131
0.494	11.41	-23.3287	-0.00933149
0.49404	-4.803	-23.1749	-0.00926998
0.49408	9.214	-23.017	-0.00920681
0.49412	16.12	-22.855	-0.009142
0.49416	-1.421	-22.6889	-0.00907558
0.4942	-48.62	-22.5188	-0.00900754
0.49424	-28.7	-22.3447	-0.00893789
0.49428	-169.3	-22.1666	-0.00886665
0.49432	-101.2	-21.9846	-0.00879384
0.49436	-8.271	-21.7987	-0.00871949
0.4944	-23.24	-21.6091	-0.00864363
0.49444	34.3	-21.4158	-0.00856631
0.49448	19.94	-21.219	-0.00848758
0.49452	26.56	-21.0187	-0.00840747
0.49456	-9.6	-20.815	-0.00832601
0.4946	-22.2	-20.6081	-0.00824322
0.49464	-30.15	-20.3978	-0.00815913
0.49468	-37.87	-20.1844	-0.00807376
0.49472	-34.14	-19.9678	-0.00798713
0.49476	-32.52	-19.7481	-0.00789926
0.4948	-61.68	-19.5255	-0.00781018
0.49484	-33.33	-19.2998	-0.00771993
0.49488	-29.6	-19.0713	-0.00762854
0.49492	-24.54	-18.8401	-0.00753604
0.49496	-11.94	-18.6062	-0.00744248
0.495	3.232	-18.3697	-0.00734789
0.49504	22.71	-18.1308	-0.00725232
0.49508	5.949	-17.8895	-0.00715579
0.49512	3.145	-17.6459	-0.00705835
0.49516	1.7	-17.4	-0.00696001
0.4952	-36.1	-17.152	-0.0068608
0.49524	-56.36	-16.9018	-0.00676074
0.49528	-68.7	-16.6496	-0.00665985
0.49532	-51.51	-16.3954	-0.00655818
0.49536	-37.32	-16.1393	-0.00645574
0.4954	-14.95	-15.8815	-0.00635259
0.49544	7.798	-15.6219	-0.00624876
0.49548	26.73	-15.3608	-0.00614431
0.49552	18.52	-15.0982	-0.00603927
0.49556	-14.83	-14.8342	-0.00593368
0.4956	-24.51	-14.5689	-0.00582758
0.49564	-21.33	-14.3025	-0.00572098
0.49568	-18.65	-14.0348	-0.00561393
0.49572	-42.29	-13.7662	-0.00550647
0.49576	-9.658	-13.4965	-0.00539861
0.4958	-31.02	-13.226	-0.0052904
0.49584	-32.32	-12.9547	-0.00518189
0.49588	-17.78	-12.6827	-0.0050731
0.49592	1.527	-12.4102	-0.00496408
0.49596	-18.47	-12.1372	-0.00485488
0.496	5.255	-11.8638	-0.00474554
0.49604	12.54	-11.5902	-0.0046361
0.49608	-43.73	-11.3165	-0.00452659
0.49612	1.642	-11.0427	-0.00441707
0.49616	4.33	-10.7689	-0.00430757
0.4962	-21.48	-10.4953	-0.00419813
0.49624	-28.73	-10.222	-0.00408878
0.49628	20.86	-9.94894	-0.00397958
0.49632	-27.06	-9.67637	-0.00387055
0.49636	-62.55	-9.40434	-0.00376173
0.4964	-21.22	-9.13295	-0.00365318
0.49644	-16.51	-8.86234	-0.00354493
0.49648	-19.34	-8.5926	-0.00343704
0.49652	1.556	-8.32389	-0.00332956
0.49656	27.8	-8.05632	-0.00322253
0.4966	20.89	-7.79003	-0.00311601
0.49664	62.54	-7.52512	-0.00301005
0.49668	57.36	-7.26169	-0.00290468
0.49672	12.91	-6.99982	-0.00279993
0.49676	26.67	-6.73957	-0.00269583
0.4968	7.22	-6.48098	-0.00259239
0.49684	-29.34	-6.22408	-0.00248963
0.49688	-26.68	-5.96889	-0.00238756
0.49692	-0.9588	-5.71546	-0.00228618
0.49696	-20.7	-5.46381	-0.00218552
0.497	14.42	-5.21399	-0.0020856
0.49704	9.59	-4.96604	-0.00198642
0.49708	4.33	-4.72	-0.001888
0.49712	43.03	-4.47589	-0.00179035
0.49716	27.02	-4.23374	-0.00169349
0.4972	-1.71	-3.99355	-0.00159742
0.49724	19.3	-3.75534	-0.00150214
0.49728	1.816	-3.51909	-0.00140763
0.49732	-15.93	-3.28479	-0.00131391
0.49736	-14.72	-3.05242	-0.00122097
0.4974	-8.242	-2.82199	-0.00112879
0.49744	-38.44	-2.59347	-0.00103739
0.49748	-29.17	-2.36687	-0.000946748
0.49752	-1.97	-2.1422	-0.00085688
0.49756	-21.65	-1.91947	-0.00076779
0.4976	-2.491	-1.69872	-0.000679487
0.49764	24.33	-1.47995	-0.000591981
0.49768	31.58	-1.2632	-0.000505282
0.49772	20.25	-1.04849	-0.000419396
0.49776	21.3	-0.835818	-0.000334327
0.4978	-17.4	-0.625183	-0.000250073
0.49784	-30.81	-0.416582	-0.000166633
0.49788	-21.07	-0.210011	-8.40044e-05
0.49792	-51.33	-0.00547698	-2.19079e-06
0.49796	-51.19	0.197001	7.88003e-05
0.498	-17	0.397387	0.000158955
0.49804	1.18	0.59563	0.000238252
0.49808	15.46	0.791671	0.000316669
0.49812	18.61	0.985451	0.00039418
0.49816	46.15	1.17691	0.000470765
0.4982	40.43	1.36601	0.000546405
0.49824	27.34	1.55271	0.000621086
0.49828	42.62	1.737	0.000694801
0.49832	48.06	1.91887	0.00076755
0.49836	37.86	2.09834	0.000839335
0.4984	31.21	2.27542	0.000910168
0.49844	14.56	2.45016	0.000980066
0.49848	-7.722	2.62262	0.00104905
0.49852	-28.73	2.79284	0.00111714
0.49856	-37.43	2.96089	0.00118435
0.4986	7.74	3.12679	0.00125072
0.49864	17.45	3.29058	0.00131623
0.49868	7.451	3.4523	0.00138092
0.49872	18.23	3.61198	0.00144479
0.49876	33.43	3.76965	0.00150786
0.4988	44.91	3.92536	0.00157014
0.49884	-5.814	4.07916	0.00163166
0.49888	-7.086	4.23111	0.00169244
0.49892	-15.73	4.38128	0.00175251
0.49896	-2.115	4.52973	0.00181189
0.499	4.532	4.67652	0.00187061
0.49904	-30.55	4.82168	0.00192867
0.49908	3.434	4.96528	0.00198611
0.49912	-14.57	5.10735	0.00204294
0.49916	-5.467	5.24792	0.00209917
0.4992	18.17	5.38703	0.00215481
0.49924	-6.132	5.52469	0.00220988
0.49928	9.446	5.66094	0.00226438
0.49932	25.25	5.7958	0.00231832
0.49936	42.19	5.9293	0.00237172
0.4994	28.2	6.06148	0.00242459
0.49944	17.48	6.19238	0.00247695
0.49948	-19.17	6.32206	0.00252882
0.49952	2.741	6.45056	0.00258023
0.49956	-9.571	6.57795	0.00263118
0.4996	-14.14	6.70428	0.00268171
0.49964	-24.2	6.82957	0.00273183
0.49968	-6.652	6.95387	0.00278155
0.49972	8.868	7.07721	0.00283088
0.49976	21.76	7.1996	0.00287984
0.4998	45.17	7.32105	0.00292842
0.49984	23.84	7.44161	0.00297664
0.49988	7.712	7.5613	0.00302452
0.49992	-8.589	7.68017	0.00307207
0.49996	22.86	7.79825	0.0031193
0.5	8.434	7.9156	0.00316624
0.50004	5.515	8.03225	0.0032129
0.50008	-2.404	8.14825	0.0032593
0.50012	-21.97	8.26363	0.00330545
0.50016	-17.14	8.37845	0.00335138
0.5002	-7.722	8.49272	0.00339709
0.50024	-8.271	8.60646	0.00344258
0.50028	-19.92	8.71968	0.00348787
0.50032	20.34	8.83239	0.00353296
0.50036	12.13	8.94459	0.00357784
0.5004	32.02	9.05627	0.00362251
0.50044	26.61	9.16743	0.00366697
0.50048	11.06	9.27808	0.00371123
0.50052	-1.479	9.38824	0.00375529
0.50056	-17.95	9.49791	0.00379916
0.5006	-12.58	9.6071	0.00384284
0.50064	-13.24	9.71582	0.00388633
0.50068	-18.07	9.82405	0.00392962
0.50072	-33.73	9.93177	0.00397271
0.50076	-16.45	10.039	0.00401559
0.5008	2.452	10.1456	0.00405823
0.50084	-11.65	10.2516	0.00410062
0.50088	-22.63	10.3568	0.00414274
0.50092	7.249	10.4614	0.00418454
0.50096	7.769	10.565	0.00422601
0.501	35.11	10.6678	0.00426711
0.50104	43.64	10.7695	0.00430781
0.50108	20.34	10.8702	0.00434807
0.50112	5.284	10.9697	0.00438788
0.50116	-0.3519	11.068	0.00442721
0.5012	-40.7	11.1651	0.00446602
0.50124	-34.22	11.2608	0.00450431
0.50128	-24.34	11.3551	0.00454202
0.50132	-33.44	11.4478	0.00457912
0.50136	-19.37	11.5389	0.00461557
0.5014	23.69	11.6283	0.0046513
0.50144	41.55	11.7157	0.00468627
0.50148	17.86	11.801	0.00472042
0.50152	37.45	11.8842	0.00475369
0.50156	71.58	11.9651	0.00478603
0.5016	79.7	12.0435	0.0048174
0.50164	65.72	12.1194	0.00484776
0.50168	52.94	12.1927	0.00487708
0.50172	3.174	12.2634	0.00490535
0.50176	-13.39	12.3313	0.00493254
0.5018	-15.84	12.3966	0.00495864
0.50184	35.05	12.4591	0.00498364
0.50188	24.82	12.5188	0.00500752
0.50192	8.001	12.5756	0.00503025
0.50196	49.33	12.6296	0.00505182
0.502	84.56	12.6806	0.00507222
0.50204	94.18	12.7286	0.00509143
0.50208	18.52	12.7737	0.00510946
0.50212	-16.71	12.8158	0.00512632
0.50216	26.58	12.855	0.00514201
0.5022	15.77	12.8914	0.00515654
0.50224	12.25	12.9248	0.00516994
0.50228	-29.17	12.9555	0.0051822
0.50232	-38.15	12.9834	0.00519335
0.50236	6.382	13.0084	0.00520338
0.5024	24.65	13.0307	0.00521229
0.50244	29.19	13.0502	0.00522008
0.50248	6.006	13.0669	0.00522674
0.50252	33.49	13.0807	0.00523229
0.50256	28.49	13.0918	0.00523672
0.5026	27.13	13.1001	0.00524002
0.50264	-26.8	13.1055	0.00524221
0.50268	-6.97	13.1082	0.00524329
0.50272	-15	13.1081	0.00524325
0.50276	-15.84	13.1053	0.00524211
0.5028	-22.46	13.0996	0.00523984
0.50284	-34.25	13.0911	0.00523645
0.50288	20.02	13.0797	0.0052319
0.50292	-2.751	13.0655	0.00522618
0.50296	39.21	13.0482	0.00521927
0.503	26.27	13.0278	0.00521113
0.50304	31.67	13.0044	0.00520175
0.50308	32.1	12.9778	0.00519112
0.50312	17.45	12.948	0.0051792
0.50316	30.83	12.915	0.00516599
0.5032	35.92	12.8787	0.00515147
0.50324	39.82	12.8391	0.00513563
0.50328	-3.387	12.7962	0.00511848
0.50332	18.78	12.75	0.00509999
0.50336	18.2	12.7004	0.00508018
0.5034	14.85	12.6476	0.00505903
0.50344	24.3	12.5913	0.00503654
0.50348	16.15	12.5318	0.00501271
0.50352	42.13	12.4688	0.00498753
0.50356	11.09	12.4025	0.00496102
0.5036	46.44	12.3329	0.00493317
0.50364	20.95	12.26	0.00490398
0.50368	22.65	12.1837	0.00487348
0.50372	17.42	12.1041	0.00484166
0.50376	-0.8721	12.0213	0.00480854
0.5038	-6.248	11.9353	0.00477413
0.50384	24.45	11.8461	0.00473844
0.50388	6.238	11.7537	0.00470149
0.50392	44.97	11.6582	0.00466328
0.50396	44.33	11.5596	0.00462383
0.504	34.45	11.4579	0.00458315
0.50404	-0.4964	11.3531	0.00454126
0.50408	19.56	11.2454	0.00449818
0.50412	30.23	11.1348	0.00445393
0.50416	6.613	11.0214	0.00440855
0.5042	23.23	10.9051	0.00436205
0.50424	10.72	10.7861	0.00431446
0.50428	24.16	10.6645	0.0042658
0.50432	8.001	10.5403	0.00421612
0.50436	8.232	10.4136	0.00416543
0.5044	5.688	10.2844	0.00411376
0.50444	-0.901	10.1529	0.00406115
0.50448	37.51	10.0191	0.00400762
0.50452	-11.33	9.88301	0.0039532
0.50456	1.18	9.74481	0.00389792
0.5046	21.09	9.60453	0.00384181
0.50464	7.972	9.46223	0.00378489
0.50468	12.6	9.31799	0.0037272
0.50472	3.608	9.17187	0.00366875
0.50476	20.25	9.02395	0.00360958
0.5048	25.49	8.87429	0.00354972
0.50484	35.28	8.72297	0.00348919
0.50488	14.27	8.57008	0.00342803
0.50492	15.63	8.41569	0.00336628
0.50496	10.69	8.25991	0.00330396
0.505	-0.2074	8.10282	0.00324113
0.50504	-10.03	7.94452	0.00317781
0.50508	-11.48	7.7851	0.00311404
0.50512	-3.387	7.62465	0.00304986
0.50516	8.868	7.46324	0.0029853
0.5052	-4.138	7.30096	0.00292038
0.50524	2.336	7.13787	0.00285515
0.50528	4.764	6.97406	0.00278962
0.50532	19.59	6.80957	0.00272383
0.50536	22.28	6.64449	0.0026578
0.5054	-2.519	6.47889	0.00259156
0.50544	20.14	6.31284	0.00252514
0.50548	26.41	6.14642	0.00245857
0.50552	-16.22	5.97972	0.00239189
0.50556	-3.647	5.81281	0.00232512
0.5056	-13.44	5.64577	0.00225831
0.50564	4.359	5.47868	0.00219147
0.50568	-11.77	5.31161	0.00212464
0.50572	8.087	5.14463	0.00205785
0.50576	-16.25	4.97779	0.00199112
0.5058	3.694	4.81116	0.00192447
0.50584	19.27	4.6448	0.00185792
0.50588	10.31	4.47876	0.00179151
0.50592	20.66	4.3131	0.00172524
0.50596	2.567	4.14788	0.00165915
0.506	1.18	3.98317	0.00159327
0.50604	-4.427	3.81903	0.00152761
0.50608	-55.15	3.65553	0.00146221
0.50612	-41.83	3.49272	0.00139709
0.50616	-25.12	3.33065	0.00133226
0.5062	-29.14	3.16933	0.00126773
0.50624	-21.31	3.00878	0.00120351
0.50628	29.59	2.84899	0.0011396
0.50632	31.87	2.68997	0.00107599
0.50636	31.03	2.53171	0.00101269
0.5064	16.99	2.37423	0.000949691
0.50644	8.029	2.21753	0.000887012
0.50648	-11.33	2.06165	0.000824659
0.50652	-18.94	1.9066	0.000762642
0.50656	-6.479	1.75242	0.00070097
0.5066	-39.14	1.59912	0.00063965
0.50664	-37.06	1.44671	0.000578685
0.50668	-38.53	1.29518	0.000518073
0.50672	-45	1.14452	0.000457806
0.50676	-28.07	0.994676	0.000397871
0.5068	21.27	0.845614	0.000338246
0.50684	62.94	0.697273	0.000278909
0.50688	63.9	0.549603	0.000219841
0.50692	76.99	0.402573	0.000161029
0.50696	25.83	0.256178	0.000102471
0.507	-6.045	0.110432	4.41727e-05
0.50704	-31.77	-0.0346374	-1.3855e-05
0.50708	-88.04	-0.179005	-7.16018e-05
0.50712	-78.36	-0.32266	-0.000129064
0.50716	-58.99	-0.465619	-0.000186248
0.5072	-30.18	-0.607926	-0.000243171
0.50724	19.5	-0.749646	-0.000299858
0.50728	6.989	-0.890853	-0.000356341
0.50732	38.23	-1.03162	-0.000412649
0.50736	52.07	-1.17202	-0.000468808
0.5074	45.57	-1.3121	-0.00052484
0.50744	23.69	-1.4519	-0.000580759
0.50748	-6.652	-1.59143	-0.000636573
0.50752	45.11	-1.73071	-0.000692285
0.50756	-8.097	-1.86974	-0.000747898
0.5076	-67.49	-2.00852	-0.000803409
0.50764	-66.3	-2.14705	-0.00085882
0.50768	-101.6	-2.28534	-0.000914137
0.50772	-95.78	-2.42346	-0.000969382
0.50776	-67.17	-2.56147	-0.00102459
0.5078	-39.83	-2.69949	-0.0010798
0.50784	26.27	-2.83767	-0.00113507
0.50788	46.55	-2.97615	-0.00119046
0.50792	34.39	-3.11509	-0.00124603
0.50796	62.94	-3.2546	-0.00130184
0.508	23.06	-3.3948	-0.00135792
0.50804	-17.17	-3.53578	-0.00141431
0.50808	11.93	-3.67763	-0.00147105
0.50812	29.1	-3.82043	-0.00152817
0.50816	34.71	-3.96425	-0.0015857
0.5082	51.53	-4.10916	-0.00164366
0.50824	26.56	-4.25519	-0.00170208
0.50828	-10.81	-4.40238	-0.00176095
0.50832	-16.62	-4.55076	-0.0018203
0.50836	-29.14	-4.70032	-0.00188013
0.5084	-50.78	-4.85111	-0.00194045
0.50844	-11.51	-5.00316	-0.00200126
0.50848	24.36	-5.1565	-0.0020626
0.50852	-8.242	-5.31118	-0.00212447
0.50856	34.94	-5.46726	-0.0021869
0.5086	25.98	-5.62475	-0.0022499
0.50864	10.66	-5.78369	-0.00231348
0.50868	-13.04	-5.94409	-0.00237764
0.50872	-9.687	-6.10597	-0.00244239
0.50876	-11.91	-6.26933	-0.00250773
0.5088	4.85	-6.43418	-0.00257367
0.50884	-5.467	-6.60053	-0.00264021
0.50888	-31.04	-6.76839	-0.00270736
0.50892	-47.87	-6.93778	-0.00277511
0.50896	-48.1	-7.10871	-0.00284348
0.509	-44.4	-7.28121	-0.00291249
0.50904	-29.83	-7.45535	-0.00298214
0.50908	17.08	-7.63116	-0.00305247
0.50912	37.28	-7.80874	-0.00312349
0.50916	81.61	-7.98812	-0.00319525
0.5092	71.5	-8.16935	-0.00326774
0.50924	30.37	-8.35244	-0.00334098
0.50928	-4.514	-8.53738	-0.00341495
0.50932	-27.52	-8.72414	-0.00348965
0.50936	-55.12	-8.91267	-0.00356507
0.5094	-64.25	-9.10296	-0.00364119
0.50944	-38.04	-9.295	-0.003718
0.50948	-20	-9.48878	-0.00379551
0.50952	-11.1	-9.68433	-0.00387373
0.50956	-1.219	-9.88167	-0.00395267
0.5096	-13.5	-10.0808	-0.00403233
0.50964	-10.64	-10.2818	-0.00411272
0.50968	12.65	-10.4846	-0.00419386
0.50972	35.02	-10.6894	-0.00427574
0.50976	53.46	-10.896	-0.00435838
0.5098	37.68	-11.1044	-0.00444178
0.50984	15.49	-11.3148	-0.00452591
0.50988	-11.36	-11.5269	-0.00461076
0.50992	-19.4	-11.7408	-0.00469632
0.50996	-13.13	-11.9564	-0.00478255
0.51	-22.03	-12.1736	-0.00486944
0.51004	-35.32	-12.3924	-0.00495696
0.51008	5.977	-12.6127	-0.00504509
0.51012	44.91	-12.8345	-0.00513381
0.51016	63.98	-13.0577	-0.0052231
0.5102	33.49	-13.2823	-0.00531293
0.51024	-8.126	-13.5081	-0.00540325
0.51028	-15.9	-13.7351	-0.00549402
0.51032	-11.71	-13.963	-0.0055852
0.51036	-45.06	-14.1918	-0.00567673
0.5104	-17.06	-14.4214	-0.00576856
0.51044	-8.936	-14.6516	-0.00586064
0.51048	-26.39	-14.8824	-0.00595294
0.51052	0.6597	-15.1135	-0.0060454
0.51056	28.32	-15.345	-0.00613799
0.5106	-12.66	-15.5766	-0.00623064
0.51064	-5.207	-15.8083	-0.00632332
0.51068	0.4862	-16.0399	-0.00641596
0.51072	0.8909	-16.2713	-0.00650851
0.51076	7.769	-16.5023	-0.00660092
0.5108	49.13	-16.7328	-0.00669311
0.51084	-24.11	-16.9626	-0.00678503
0.51088	-57.08	-17.1915	-0.00687661
0.51092	-24.86	-17.4194	-0.00696776
0.51096	-27.11	-17.6461	-0.00705842
0.511	-4.196	-17.8713	-0.00714853
0.51104	27.48	-18.095	-0.00723802
0.51108	43.12	-18.317	-0.00732681
0.51112	43.35	-18.5371	-0.00741483
0.51116	56.15	-18.755	-0.00750201
0.5112	14.01	-18.9706	-0.00758823
0.51124	-9.86	-19.1835	-0.00767341
0.51128	-52.49	-19.3935	-0.00775742
0.51132	-48.67	-19.6004	-0.00784016
0.51136	-25.15	-19.8038	-0.00792152
0.5114	-22.89	-20.0035	-0.00800141
0.51144	-39.48	-20.1993	-0.0080797
0.51148	-66.51	-20.3908	-0.00815631
0.51152	-58.96	-20.5778	-0.00823114
0.51156	-101.6	-20.7602	-0.00830409
0.5116	-79.08	-20.9377	-0.00837508
0.51164	-30.47	-21.1101	-0.00844405
0.51168	-37.66	-21.2773	-0.00851091
0.51172	-26.05	-21.4391	-0.00857562
0.51176	19.85	-21.5953	-0.00863811
0.5118	25.89	-21.7458	-0.00869832
0.51184	-33.36	-21.8905	-0.00875618
0.51188	-76.19	-22.0291	-0.00881164
0.51192	-79.11	-22.1615	-0.00886461
0.51196	-51.45	-22.2876	-0.00891503
0.512	-11.28	-22.4072	-0.00896287
0.51204	-59.63	-22.5201	-0.00900805
0.51208	-51.28	-22.6263	-0.00905054
0.51212	-43.88	-22.7257	-0.00909029
0.51216	-25.09	-22.8181	-0.00912726
0.5122	-27.35	-22.9035	-0.00916141
0.51224	-91.04	-22.9818	-0.00919271
0.51228	-92.29	-23.0528	-0.00922113
0.51232	-81.33	-23.1166	-0.00924664
0.51236	-21.54	-23.1731	-0.00926923
0.5124	-29.4	-23.2222	-0.00928889
0.51244	-44.11	-23.2641	-0.00930562
0.51248	-43.27	-23.2985	-0.00931942
0.51252	-23.59	-23.3257	-0.00933028
0.51256	-60.21	-23.3455	-0.00933821
0.5126	-46.45	-23.358	-0.00934321
0.51264	-12.84	-23.3632	-0.0093453
0.51268	-1.71	-23.3612	-0.00934448
0.51272	6.382	-23.3519	-0.00934076
0.51276	-1.421	-23.3354	-0.00933415
0.5128	-55.87	-23.3117	-0.00932466
0.51284	-5.265	-23.2807	-0.00931229
0.51288	-61.39	-23.2426	-0.00929703
0.51292	-101.4	-23.1973	-0.0092789
0.51296	-121.9	-23.1448	-0.00925791
0.513	-34.2	-23.0852	-0.00923408
0.51304	-23.91	-23.0186	-0.00920743
0.51308	-37.29	-22.945	-0.00917801
0.51312	-7.606	-22.8646	-0.00914586
0.51316	-19.25	-22.7775	-0.00911101
0.5132	3.492	-22.6837	-0.0090735
0.51324	-0.8721	-22.5834	-0.00903337
0.51328	-20.96	-22.4766	-0.00899065
0.51332	-24.43	-22.3634	-0.00894538
0.51336	-21.68	-22.2439	-0.00889758
0.5134	-60.21	-22.1182	-0.00884728
0.51344	-61.82	-21.9863	-0.00879452
0.51348	-8.964	-21.8483	-0.00873933
0.51352	12.05	-21.7044	-0.00868175
0.51356	3.29	-21.5545	-0.00862182
0.5136	36.76	-21.3989	-0.00855957
0.51364	40.23	-21.2376	-0.00849504
0.51368	-37.72	-21.0706	-0.00842824
0.51372	-14.89	-20.898	-0.00835919
0.51376	-35.47	-20.7198	-0.00828791
0.5138	-53.79	-20.536	-0.00821441
0.51384	-24.77	-20.3468	-0.0081387
0.51388	-54.66	-20.152	-0.00806082
0.51392	-85.96	-19.9519	-0.00798077
0.51396	-52.03	-19.7465	-0.00789859
0.514	-73.79	-19.5358	-0.00781432
0.51404	-43.18	-19.32	-0.007728
0.51408	-14.98	-19.0992	-0.00763968
0.51412	17.31	-18.8735	-0.00754941
0.51416	-9.571	-18.6431	-0.00745725
0.5142	-46.51	-18.4081	-0.00736325
0.51424	-42.75	-18.1686	-0.00726745
0.51428	-71.51	-17.9248	-0.00716991
0.51432	-71.45	-17.6767	-0.0070707
0.51436	-85.58	-17.4246	-0.00696986
0.5144	-41.56	-17.1687	-0.00686748
0.51444	9.475	-16.9091	-0.00676364
0.51448	74.16	-16.646	-0.00665841
0.51452	40.43	-16.3797	-0.00655189
0.51456	48.14	-16.1104	-0.00644414
0.5146	14.79	-15.8381	-0.00633523
0.51464	-25.24	-15.563	-0.0062252
0.51468	0.255	-15.2852	-0.0061141
0.51472	-19.37	-15.0049	-0.00600197
0.51476	-1.797	-14.7222	-0.00588887
0.5148	-22.81	-14.4371	-0.00577484
0.51484	-48.91	-14.1498	-0.00565992
0.51488	-47.75	-13.8604	-0.00554416
0.51492	-73.39	-13.569	-0.0054276
0.51496	-53.47	-13.2758	-0.0053103
0.515	-27.89	-12.9808	-0.00519234
0.51504	14.65	-12.6844	-0.00507377
0.51508	85.95	-12.3867	-0.00495466
0.51512	78.81	-12.0877	-0.00483509
0.51516	67.62	-11.7877	-0.00471509
0.5152	16.61	-11.4868	-0.00459473
0.51524	-43.01	-11.185	-0.00447401
0.51528	-97.58	-10.8824	-0.00435298
0.51532	-111.8	-10.5791	-0.00423165
0.51536	-88.7	-10.2752	-0.00411008
0.5154	-32.09	-9.97079	-0.00398832
0.51544	14.19	-9.66606	-0.00386642
0.51548	50.8	-9.36119	-0.00374447
0.51552	40.57	-9.05633	-0.00362253
0.51556	-8.444	-8.75165	-0.00350066
0.5156	-22.4	-8.44727	-0.00337891
0.51564	-9.253	-8.14334	-0.00325734
0.51568	-13.65	-7.83998	-0.00313599
0.51572	-4.196	-7.53732	-0.00301493
0.51576	11.06	-7.2355	-0.0028942
0.5158	20.31	-6.93466	-0.00277387
0.51584	-0.9588	-6.63493	-0.00265397
0.51588	-56.36	-6.33641	-0.00253456
0.51592	-66.85	-6.03925	-0.0024157
0.51596	-37.87	-5.74357	-0.00229743
0.516	16.27	-5.44953	-0.00217981
0.51604	51.32	-5.15729	-0.00206291
0.51608	65.51	-4.86701	-0.0019468
0.51612	71.67	-4.57882	-0.00183153
0.51616	53.9	-4.29285	-0.00171714
0.5162	-42.4	-4.00917	-0.00160367
0.51624	-59.57	-3.72786	-0.00149114
0.51628	-33.44	-3.449	-0.0013796
0.51632	-39.08	-3.17269	-0.00126907
0.51636	10.34	-2.89902	-0.00115961
0.5164	31.64	-2.62812	-0.00105125
0.51644	57.39	-2.36011	-0.000944042
0.51648	33.95	-2.09507	-0.000838027
0.51652	26.27	-1.83309	-0.000733236
0.51656	-1.941	-1.57425	-0.000629698
0.5166	-13.27	-1.31859	-0.000527437
0.51664	53.98	-1.06619	-0.000426474
0.51668	39.59	-0.817076	-0.00032683
0.51672	63.29	-0.571301	-0.00022852
0.51676	18.29	-0.32888	-0.000131552
0.5168	-58.27	-0.0898171	-3.59269e-05
0.51684	-52.61	0.145886	5.83545e-05
0.51688	-73.56	0.378217	0.000151287
0.51692	-51.45	0.607138	0.000242855
0.51696	15.69	0.832594	0.000333038
0.517	60.95	1.05451	0.000421805
0.51704	55.4	1.27282	0.000509129
0.51708	93.09	1.48747	0.00059499
0.51712	76.64	1.69844	0.000679376
0.51716	32.71	1.90572	0.000762289
0.5172	28.69	2.10935	0.00084374
0.51724	-10.61	2.30936	0.000923746
0.51728	25.8	2.50582	0.00100233
0.51732	21.38	2.69877	0.00107951
0.51736	14.85	2.88828	0.00115531
0.5174	-18.27	3.07442	0.00122977
0.51744	-3.097	3.25726	0.0013029
0.51748	-13.27	3.43685	0.00137474
0.51752	-9.514	3.61327	0.00144531
0.51756	5.11	3.78658	0.00151463
0.5176	42.36	3.95681	0.00158272
0.51764	32.74	4.12404	0.00164962
0.51768	50.28	4.28833	0.00171533
0.51772	40.02	4.44976	0.0017799
0.51776	34.18	4.60842	0.00184337
0.5178	-3.762	4.76443	0.00190577
0.51784	-20.03	4.91789	0.00196716
0.51788	-21.77	5.06893	0.00202757
0.51792	-12.75	5.21766	0.00208706
0.51796	-6.855	5.36417	0.00214567
0.518	12.91	5.50856	0.00220342
0.51804	-8.936	5.65092	0.00226037
0.51808	-9.311	5.79132	0.00231653
0.51812	21.5	5.92987	0.00237195
0.51816	23.87	6.06663	0.00242665
0.5182	24.1	6.2017	0.00248068
0.51824	27.34	6.33517	0.00253407
0.51828	15.77	6.46713	0.00258685
0.51832	11.24	6.59768	0.00263907
0.51836	7.827	6.72694	0.00269078
0.5184	22.02	6.85503	0.00274201
0.51844	4.619	6.98204	0.00279282
0.51848	-19.57	7.10811	0.00284324
0.51852	-2.924	7.23333	0.00289333
0.51856	1.267	7.35783	0.00294313
0.5186	-1.421	7.4817	0.00299268
0.51864	16.67	7.60505	0.00304202
0.51868	16.21	7.72798	0.00309119
0.51872	0.2261	7.85058	0.00314023
0.51876	10.51	7.97296	0.00318918
0.5188	-25.84	8.09521	0.00323809
0.51884	-22.78	8.21745	0.00328698
0.51888	-22.75	8.33974	0.0033359
0.51892	-16.54	8.46218	0.00338487
0.51896	-15.47	8.58482	0.00343393
0.519	7.769	8.70771	0.00348309
0.51904	-9.658	8.83092	0.00353237
0.51908	-20.5	8.95447	0.00358179
0.51912	-21.54	9.0784	0.00363136
0.51916	0.7175	9.20273	0.00368109
0.5192	-1.855	9.32749	0.003731
0.51924	9.041	9.45268	0.00378107
0.51928	6.931	9.5783	0.00383132
0.51932	18.64	9.70436	0.00388174
0.51936	16.61	9.83087	0.00393235
0.5194	-12.72	9.95783	0.00398313
0.51944	0.6886	10.0852	0.0040341
0.51948	6.093	10.2131	0.00408525
0.51952	4.128	10.3414	0.00413658
0.51956	28.46	10.4702	0.00418809
0.5196	28.69	10.5995	0.00423978
0.51964	15.08	10.7291	0.00429165
0.51968	9.619	10.8593	0.0043437
0.51972	-12.32	10.9898	0.00439594
0.51976	-27.72	11.1209	0.00444836
0.5198	-10.21	11.2524	0.00450096
0.51984	1.093	11.3844	0.00455375
0.51988	12.19	11.5167	0.0046067
0.51992	19.79	11.6495	0.00465981
0.51996	35.72	11.7827	0.00471306
0.52	46.41	11.9161	0.00476646
0.52004	6.642	12.05	0.00481999
0.52008	-6.797	12.1841	0.00487364
0.52012	-11.59	12.3186	0.00492742
0.52016	-2.808	12.4533	0.00498133
0.5202	11.18	12.5883	0.00503534
0.52024	2.134	12.7236	0.00508946
0.52028	-10.5	12.8592	0.00514366
0.52032	3.781	12.9949	0.00519794
0.52036	-8.531	13.1307	0.00525228
0.5204	3.521	13.2667	0.00530667
0.52044	20.54	13.4027	0.00536107
0.52048	21.12	13.5387	0.00541547
0.52052	11.3	13.6746	0.00546985
0.52056	28.26	13.8105	0.00552418
0.5206	21.38	13.9461	0.00557845
0.52064	13.52	14.0816	0.00563263
0.52068	-2.317	14.2168	0.00568671
0.52072	-18.85	14.3517	0.00574067
0.52076	-30.06	14.4862	0.00579448
0.5208	-22.4	14.6203	0.00584812
0.52084	1.18	14.7539	0.00590155
0.52088	9.446	14.8869	0.00595475
0.52092	20.83	15.0192	0.00600767
0.52096	-10.58	15.1506	0.00606026
0.521	8.607	15.2812	0.00611249
0.52104	-16.74	15.4108	0.00616431
0.52108	-17.95	15.5392	0.00621567
0.52112	-28.91	15.6663	0.00626652
0.52116	-0.6409	15.792	0.00631681
0.5212	11.32	15.9162	0.00636647
0.52124	14.73	16.0386	0.00641544
0.52128	22.1	16.1591	0.00646365
0.52132	10.72	16.2776	0.00651103
0.52136	-4.051	16.3938	0.00655751
0.5214	-23.88	16.5076	0.00660304
0.52144	-14.51	16.6188	0.00664753
0.52148	6.787	16.7273	0.00669091
0.52152	39.16	16.8328	0.0067331
0.52156	43.92	16.9351	0.00677402
0.5216	61.01	17.034	0.00681359
0.52164	20.89	17.1293	0.00685173
0.52168	25.89	17.2209	0.00688838
0.52172	27.62	17.3086	0.00692346
0.52176	42.77	17.3923	0.00695691
0.5218	56.76	17.4717	0.00698866
0.52184	-11.22	17.5467	0.00701866
0.52188	34.39	17.6171	0.00704685
0.52192	17.68	17.6829	0.00707316
0.52196	84.04	17.7439	0.00709755
0.522	15.4	17.7999	0.00711995
0.52204	-21.45	17.8508	0.00714033
0.52208	33.9	17.8966	0.00715862
0.52212	37.91	17.937	0.00717479
0.52216	79.65	17.9719	0.00718877
0.5222	79.5	18.0013	0.00720054
0.52224	14.21	18.0251	0.00721004
0.52228	38.03	18.0431	0.00721725
0.52232	66.99	18.0554	0.00722215
0.52236	19.82	18.0618	0.00722471
0.5224	22.05	18.0623	0.0072249
0.52244	28.03	18.0568	0.00722272
0.52248	56.7	18.0454	0.00721815
0.52252	53.46	18.0279	0.00721117
0.52256	48.2	18.0044	0.00720178
0.5226	58.81	17.9749	0.00718997
0.52264	51.47	17.9394	0.00717575
0.52268	20.95	17.8978	0.00715912
0.52272	12.16	17.8503	0.00714011
0.52276	24.16	17.7968	0.00711871
0.5228	29.59	17.7374	0.00709495
0.52284	28.46	17.6721	0.00706884
0.52288	23.72	17.601	0.0070404
0.52292	-18.65	17.5241	0.00700965
0.52296	-10.47	17.4415	0.00697659
0.523	-1.19	17.3531	0.00694125
0.52304	32.51	17.2591	0.00690364
0.52308	36.09	17.1594	0.00686377
0.52312	23.32	17.0541	0.00682163
0.52316	50.14	16.9431	0.00677726
0.5232	49.01	16.8266	0.00673065
0.52324	18.72	16.7046	0.00668182
0.52328	31.06	16.577	0.00663081
0.52332	9.041	16.4441	0.00657763
0.52336	15.02	16.3057	0.0065223
0.5234	12.05	16.1621	0.00646485
0.52344	26.99	16.0133	0.00640531
0.52348	42.45	15.8593	0.0063437
0.52352	48.72	15.7001	0.00628005
0.52356	22.36	15.5359	0.00621438
0.5236	1.931	15.3668	0.00614673
0.52364	-23.65	15.1928	0.00607713
0.52368	-11.77	15.0141	0.00600562
0.52372	9.128	14.8306	0.00593223
0.52376	-15.87	14.6424	0.00585698
0.5238	3.579	14.4497	0.00577988
0.52384	-9.311	14.2524	0.00570096
0.52388	-13.47	14.0506	0.00562024
0.52392	30.08	13.8443	0.00553773
0.52396	3.839	13.6336	0.00545343
0.524	52.13	13.4184	0.00536735
0.52404	51.12	13.1988	0.00527952
0.52408	60.51	12.9748	0.00518994
0.52412	21.5	12.7466	0.00509863
0.52416	55.28	12.514	0.00500562
0.5242	-1.335	12.2774	0.00491094
0.52424	-12.11	12.0366	0.00481463
0.52428	9.388	11.7918	0.00471672
0.52432	6.671	11.5431	0.00461724
0.52436	9.619	11.2905	0.00451622
0.5244	-15.5	11.0342	0.00441369
0.52444	9.475	10.7742	0.00430968
0.52448	25.4	10.5105	0.00420421
0.52452	15.57	10.2433	0.00409732
0.52456	44.91	9.97257	0.00398903
0.5246	33.72	9.69841	0.00387936
0.52464	40.69	9.4209	0.00376836
0.52468	8.636	9.14014	0.00365606
0.52472	-42.63	8.85623	0.00354249
0.52476	-41.59	8.56927	0.00342771
0.5248	-21.51	8.27933	0.00331173
0.52484	-35.67	7.9865	0.0031946
0.52488	-33.82	7.69082	0.00307633
0.52492	14.27	7.39233	0.00295693
0.52496	28.03	7.09106	0.00283642
0.525	34.82	6.78703	0.00271481
0.52504	76.44	6.48028	0.00259211
0.52508	71.29	6.17085	0.00246834
0.52512	69.73	5.85882	0.00234353
0.52516	80.66	5.54427	0.00221771
0.5252	43.03	5.22734	0.00209094
0.52524	44.59	4.90817	0.00196327
0.52528	28.06	4.58692	0.00183477
0.52532	-17.55	4.26377	0.00170551
0.52536	-60.78	3.93891	0.00157556
0.5254	-67.23	3.61251	0.001445
0.52544	-66.97	3.28473	0.00131389
0.52548	-103.4	2.95569	0.00118228
0.52552	-48.62	2.62549	0.0010502
0.52556	-1.335	2.2942	0.000917681
0.5256	-20.47	1.96187	0.000784746
0.52564	25.43	1.62852	0.000651408
0.52568	70.37	1.2942	0.000517679
0.52572	68.98	0.958946	0.000383578
0.52576	74.07	0.622829	0.000249132
0.5258	72.22	0.28594	0.000114376
0.52584	32.13	-0.0516015	-2.06406e-05
0.52588	-24.92	-0.389653	-0.000155861
0.52592	-34.28	-0.728061	-0.000291225
0.52596	-61.71	-1.06668	-0.000426671
0.526	-95.96	-1.40537	-0.000562147
0.52604	-63.65	-1.74402	-0.000697608
0.52608	-46.02	-2.08256	-0.000833022
0.52612	-62.26	-2.42092	-0.000968366
0.52616	17.39	-2.75907	-0.00110363
0.5262	45.6	-3.09698	-0.00123879
0.52624	40.95	-3.43464	-0.00137386
0.52628	79.59	-3.772	-0.0015088
0.52632	52.8	-4.109	-0.0016436
0.52636	39.07	-4.44556	-0.00177822
0.5264	21.76	-4.78155	-0.00191262
0.52644	-37.52	-5.11687	-0.00204675
0.52648	-84.97	-5.45137	-0.00218055
0.52652	-54.54	-5.78495	-0.00231398
0.52656	-41.62	-6.11749	-0.00244699
0.5266	-78.73	-6.44892	-0.00257957
0.52664	-7.635	-6.77918	-0.00271167
0.52668	35.92	-7.10824	-0.00284329
0.52672	46.53	-7.43604	-0.00297441
0.52676	48.61	-7.76253	-0.00310501
0.5268	72.91	-8.08764	-0.00323506
0.52684	21.84	-8.41128	-0.00336451
0.52688	-15.79	-8.73332	-0.00349333
0.52692	-13.39	-9.05364	-0.00362146
0.52696	-60.7	-9.3721	-0.00374884
0.527	-35.73	-9.68856	-0.00387543
0.52704	-42.2	-10.0029	-0.00400117
0.52708	-75.15	-10.3151	-0.00412603
0.52712	-100.9	-10.625	-0.00424998
0.52716	-45.7	-10.9325	-0.00437299
0.5272	-25.21	-11.2376	-0.00449504
0.52724	-100.2	-11.5403	-0.00461612
0.52728	5.053	-11.8406	-0.00473625
0.52732	53.78	-12.1385	-0.00485542
0.52736	34.73	-12.4341	-0.00497363
0.5274	26.41	-12.7272	-0.00509089
0.52744	44.71	-13.0179	-0.00520718
0.52748	-13.96	-13.3062	-0.00532249
0.52752	21.21	-13.592	-0.00543679
0.52756	31.9	-13.8752	-0.00555006
0.5276	-32.11	-14.1557	-0.00566227
0.52764	-5.323	-14.4334	-0.00577338
0.52768	0.6597	-14.7084	-0.00588335
0.52772	-41.3	-14.9804	-0.00599215
0.52776	-14.89	-15.2493	-0.00609974
0.5278	13.12	-15.5152	-0.00620608
0.52784	-61.19	-15.7779	-0.00631114
0.52788	-54.37	-16.0372	-0.00641488
0.52792	-1.624	-16.2932	-0.00651727
0.52796	-80.03	-16.5457	-0.00661828
0.528	-53.21	-16.7947	-0.00671789
0.52804	44.1	-17.0402	-0.00681606
0.52808	-31.36	-17.282	-0.0069128
0.52812	-4.427	-17.5202	-0.00700806
0.52816	57.59	-17.7546	-0.00710185
0.5282	-64.74	-17.9853	-0.00719412
0.52824	-50.47	-18.2121	-0.00728485
0.52828	42.45	-18.435	-0.00737402
0.52832	-58.1	-18.654	-0.00746159
0.52836	-49.8	-18.8689	-0.00754755
0.5284	33.87	-19.0796	-0.00763185
0.52844	-55.47	-19.2862	-0.00771449
0.52848	-94.57	-19.4886	-0.00779543
0.52852	-42.11	-19.6867	-0.00787466
0.52856	-78.53	-19.8804	-0.00795216
0.5286	-49.86	-20.0698	-0.00802793
0.52864	44.97	-20.2549	-0.00810196
0.52868	14.73	-20.4357	-0.00817426
0.52872	13.93	-20.6121	-0.00824482
0.52876	74.21	-20.7841	-0.00831364
0.5288	-1.219	-20.9517	-0.00838069
0.52884	-55.21	-21.1149	-0.00844595
0.52888	3.03	-21.2735	-0.0085094
0.52892	-37.58	-21.4275	-0.00857099
0.52896	-100.7	-21.5768	-0.0086307
0.529	-58.79	-21.7213	-0.00868851
0.52904	12.88	-21.861	-0.00874439
0.52908	-41.1	-21.9959	-0.00879834
0.52912	-41.1	-22.1258	-0.00885034
0.52916	-16.83	-22.2509	-0.00890037
0.5292	-51.8	-22.3711	-0.00894842
0.52924	-8.271	-22.4862	-0.00899449
0.52928	48	-22.5964	-0.00903857
0.52932	8.261	-22.7016	-0.00908063
0.52936	-11.13	-22.8017	-0.00912068
0.5294	46.06	-22.8967	-0.00915868
0.52944	-28.82	-22.9865	-0.0091946
0.52948	-59.28	-23.071	-0.00922841
0.52952	-36.91	-23.1502	-0.00926007
0.52956	-80.93	-23.2239	-0.00928957
0.5296	-83.59	-23.2921	-0.00931685
0.52964	-30.26	-23.3548	-0.00934192
0.52968	-55.41	-23.4119	-0.00936476
0.52972	-40.15	-23.4634	-0.00938535
0.52976	5.775	-23.5092	-0.00940369
0.5298	-87.72	-23.5495	-0.00941979
0.52984	-87.78	-23.5841	-0.00943364
0.52988	-55.03	-23.6131	-0.00944524
0.52992	-105.6	-23.6365	-0.00945461
0.52996	-116.6	-23.6544	-0.00946177
0.53	-58.21	-23.6669	-0.00946676
0.53004	-58.18	-23.674	-0.00946962
0.53008	-82.4	-23.676	-0.0094704
0.53012	-35.15	-23.6729	-0.00946916
0.53016	-55.99	-23.6649	-0.00946597
0.5302	-50.09	-23.6522	-0.0094609
0.53024	-18.7	-23.6351	-0.00945402
0.53028	0.5151	-23.6135	-0.00944542
0.53032	25.4	-23.5879	-0.00943516
0.53036	26.9	-23.5583	-0.00942332
0.5304	11.9	-23.5249	-0.00940997
0.53044	-7.722	-23.4879	-0.00939517
0.53048	-24.6	-23.4474	-0.00937897
0.53052	-37.72	-23.4036	-0.00936143
0.53056	-43.65	-23.3565	-0.00934259
0.5306	-12.46	-23.3063	-0.00932252
0.53064	13.72	-23.2531	-0.00930126
0.53068	15.11	-23.1972	-0.00927886
0.53072	39.42	-23.1385	-0.00925538
0.53076	23.12	-23.0772	-0.00923086
0.5308	-4.08	-23.0133	-0.00920533
0.53084	-5.843	-22.947	-0.00917882
0.53088	-10.55	-22.8784	-0.00915134
0.53092	-15.87	-22.8073	-0.00912293
0.53096	5.313	-22.734	-0.0090936
0.531	12.16	-22.6584	-0.00906336
0.53104	-3.387	-22.5806	-0.00903222
0.53108	-12.2	-22.5005	-0.0090002
0.53112	-7.635	-22.4182	-0.0089673
0.53116	-29.37	-22.3338	-0.00893351
0.5312	-8.386	-22.2471	-0.00889884
0.53124	21.7	-22.1582	-0.00886329
0.53128	17.42	-22.0671	-0.00882686
0.53132	45.37	-21.9738	-0.00878953
0.53136	34.65	-21.8782	-0.00875129
0.5314	-0.2363	-21.7803	-0.00871212
0.53144	-27.03	-21.6799	-0.00867197
0.53148	-39.83	-21.5771	-0.00863082
0.53152	-114.1	-21.4716	-0.00858864
0.53156	-65.52	-21.3634	-0.00854538
0.5316	-6.595	-21.2526	-0.00850103
0.53164	-2.057	-21.1389	-0.00845557
0.53168	-49.17	-21.0225	-0.00840898
0.53172	-32.72	-20.9031	-0.00836126
0.53176	-7.288	-20.781	-0.00831238
0.5318	-41.28	-20.6558	-0.00826234
0.53184	-74.05	-20.5278	-0.00821111
0.53188	-67.4	-20.3968	-0.0081587
[truncated: 23,003 more rows]

## Sheet: Sheet2
0.6382	31.87	0.0471473	1.88589e-05
0.63824	9.792	0.234082	9.36327e-05
0.63828	22.86	0.419552	0.000167821
0.63832	-2.028	0.603637	0.000241455
0.63836	12.22	0.786421	0.000314568
0.6384	-0.323	0.967989	0.000387196
0.63844	-14.25	1.14843	0.000459373
0.63848	-4.716	1.32783	0.000531134
0.63852	-9.34	1.50628	0.000602513
0.63856	-4.687	1.68386	0.000673543
0.6386	10.8	1.86064	0.000744255
0.63864	14.07	2.0367	0.00081468
0.63868	31.44	2.21212	0.000884848
0.63872	28.78	2.38699	0.000954794
0.63876	-3.531	2.56139	0.00102456
0.6388	2.278	2.73544	0.00109417
0.63884	-8.704	2.90922	0.00116369
0.63888	-0.9877	3.08285	0.00123314
0.63892	-4.947	3.25642	0.00130257
0.63896	-6.855	3.43003	0.00137201
0.639	-5.67	3.60376	0.0014415
0.63904	11.58	3.77771	0.00151108
0.63908	-1.941	3.95197	0.00158079
0.63912	-12.32	4.12662	0.00165065
0.63916	-66.97	4.30174	0.00172069
0.6392	-43.67	4.4774	0.00179096
0.63924	12.51	4.65367	0.00186147
0.63928	-40.18	4.83057	0.00193223
0.63932	-98.99	5.00814	0.00200326
0.63936	-66.97	5.18638	0.00207455
0.6394	28	5.36527	0.00214611
0.63944	-28.73	5.54478	0.00221791
0.63948	28.75	5.72485	0.00228994
0.63952	96.47	5.90543	0.00236217
0.63956	100.5	6.08649	0.0024346
0.6396	104	6.26802	0.00250721
0.63964	118.8	6.45004	0.00258001
0.63968	21.9	6.63261	0.00265304
0.63972	-48.04	6.81583	0.00272633
0.63976	-10.93	6.9998	0.00279992
0.6398	-111	7.18461	0.00287385
0.63984	-124.1	7.37035	0.00294814
0.63988	-69.19	7.55703	0.00302281
0.63992	-67.55	7.74465	0.00309786
0.63996	-65.44	7.93318	0.00317327
0.64	15.66	8.12254	0.00324902
0.64004	21.06	8.31264	0.00332506
0.64008	60.89	8.50337	0.00340135
0.64012	122	8.69466	0.00347787
0.64016	88.52	8.88644	0.00355458
0.6402	68.29	9.07867	0.00363147
0.64024	97.57	9.27135	0.00370854
0.64028	-23.91	9.46451	0.0037858
0.64032	-61.91	9.65818	0.00386327
0.64036	-56.82	9.85242	0.00394097
0.6404	-77.46	10.0472	0.0040189
0.64044	-98.64	10.2426	0.00409705
0.64048	-4.456	10.4385	0.00417541
0.64052	32.86	10.6349	0.00425395
0.64056	8.376	10.8316	0.00433264
0.6406	53.03	11.0286	0.00441144
0.64064	50.17	11.2258	0.00449033
0.64068	39.39	11.4232	0.00456927
0.64072	17.83	11.6206	0.00464824
0.64076	9.706	11.8181	0.00472722
0.6408	-28.7	12.0155	0.00480621
0.64084	-14.31	12.2129	0.00488518
0.64088	-39.54	12.4103	0.0049641
0.64092	-70.61	12.6074	0.00504296
0.64096	-44.6	12.8043	0.00512171
0.641	-14.66	13.0008	0.00520031
0.64104	-25.41	13.1968	0.00527871
0.64108	32.05	13.3921	0.00535683
0.64112	71.64	13.5866	0.00543463
0.64116	61.96	13.7801	0.00551203
0.6412	52.97	13.9725	0.00558898
0.64124	55.83	14.1636	0.00566544
0.64128	-22.63	14.3534	0.00574135
0.64132	-20.64	14.5417	0.00581669
0.64136	-43.07	14.7285	0.0058914
0.6414	-69.31	14.9136	0.00596545
0.64144	-43.44	15.0969	0.00603877
0.64148	27.88	15.2782	0.0061113
0.64152	-3.3	15.4574	0.00618296
0.64156	6.353	15.6342	0.00625367
0.6416	81.64	15.8084	0.00632337
0.64164	56.06	15.9799	0.00639196
0.64168	48.95	16.1485	0.00645939
0.64172	42.86	16.3139	0.00652557
0.64176	68.58	16.4762	0.00659047
0.6418	24.76	16.635	0.00665402
0.64184	14.97	16.7904	0.00671617
0.64188	-18.1	16.9422	0.00677688
0.64192	-12.4	17.0902	0.0068361
0.64196	67.57	17.2344	0.00689378
0.642	51.35	17.3747	0.00694987
0.64204	37.54	17.5108	0.00700432
0.64208	29.73	17.6427	0.00705709
0.64212	66.18	17.7704	0.00710815
0.64216	66.15	17.8936	0.00715745
0.6422	74.04	18.0124	0.00720496
0.64224	49.85	18.1267	0.00725067
0.64228	15.63	18.2364	0.00729456
0.64232	51.47	18.3416	0.00733663
0.64236	62.83	18.4422	0.00737686
0.6424	8.81	18.5381	0.00741526
0.64244	-6.623	18.6295	0.00745182
0.64248	10.08	18.7164	0.00748655
0.64252	23.61	18.7986	0.00751944
0.64256	89.18	18.8763	0.0075505
0.6426	37.08	18.9493	0.00757974
0.64264	-1.392	19.0179	0.00760714
0.64268	32.45	19.0818	0.00763273
0.64272	73.92	19.1413	0.00765652
0.64276	24.04	19.1963	0.00767852
0.6428	-16.65	19.2469	0.00769874
0.64284	19.97	19.293	0.00771721
0.64288	-20.87	19.3349	0.00773395
0.64292	18.4	19.3724	0.00774896
0.64296	-20.87	19.4056	0.00776225
0.643	8.405	19.4346	0.00777384
0.64304	35.46	19.4593	0.00778372
0.64308	28.14	19.4798	0.00779191
0.64312	16.84	19.496	0.00779839
0.64316	47.39	19.508	0.00780318
0.6432	51.35	19.5157	0.00780629
0.64324	69.56	19.5193	0.00780771
0.64328	16.01	19.5187	0.00780747
0.64332	21.01	19.514	0.00780559
0.64336	-21.22	19.5052	0.00780207
0.6434	7.683	19.4924	0.00779695
0.64344	22.94	19.4756	0.00779024
0.64348	11.7	19.4549	0.00778196
0.64352	31.29	19.4303	0.00777211
0.64356	53.06	19.4018	0.00776071
0.6436	7.683	19.3694	0.00774777
0.64364	22.83	19.3333	0.00773331
0.64368	68.14	19.2934	0.00771736
0.64372	35.49	19.2498	0.00769993
0.64376	20.31	19.2026	0.00768104
0.6438	26.01	19.1518	0.00766072
0.64384	14.76	19.0975	0.00763901
0.64388	-4.918	19.0398	0.00761592
0.64392	4.359	18.9787	0.00759149
0.64396	-17.66	18.9144	0.00756575
0.644	13.55	18.8468	0.00753871
0.64404	7.423	18.776	0.0075104
0.64408	26.29	18.7021	0.00748082
0.64412	26.01	18.625	0.00745
0.64416	54.5	18.5449	0.00741796
0.6442	64.99	18.4618	0.0073847
0.64424	33.9	18.3756	0.00735026
0.64428	37.45	18.2866	0.00731466
0.64432	25.05	18.1948	0.00727793
0.64436	15.17	18.1003	0.00724011
0.6444	-12.72	18.0031	0.00720124
0.64444	-10.96	17.9034	0.00716135
0.64448	-9.514	17.8012	0.00712046
0.64452	0.3995	17.6965	0.00707861
0.64456	7.018	17.5896	0.00703583
0.6446	-1.768	17.4803	0.00699212
0.64464	26.67	17.3688	0.00694751
0.64468	44.42	17.255	0.00690201
0.64472	63.38	17.1391	0.00685564
0.64476	49.94	17.0211	0.00680843
0.6448	23.55	16.901	0.0067604
0.64484	18.69	16.7789	0.00671158
0.64488	15.2	16.655	0.006662
0.64492	-2.346	16.5293	0.00661171
0.64496	12.39	16.4018	0.00656073
0.645	16.04	16.2727	0.00650909
0.64504	23.4	16.1421	0.00645683
0.64508	20.02	16.0099	0.00640398
0.64512	0.5729	15.8764	0.00635056
0.64516	12.54	15.7415	0.00629662
0.6452	8.781	15.6054	0.00624217
0.64524	47.42	15.4681	0.00618726
0.64528	29.3	15.3298	0.00613191
0.64532	25.43	15.1904	0.00607615
0.64536	25.25	15.05	0.00602002
0.6454	26.29	14.9089	0.00596355
0.64544	21.79	14.767	0.00590679
0.64548	2.047	14.6245	0.00584978
0.64552	14.21	14.4814	0.00579256
0.64556	27.16	14.3379	0.00573516
0.6456	33.95	14.1941	0.00567762
0.64564	41.67	14.05	0.00562
0.64568	25.75	13.9058	0.00556234
0.64572	29.04	13.7617	0.00550468
0.64576	14.91	13.6177	0.00544707
0.6458	-23.33	13.4739	0.00538958
0.64584	-11.97	13.3306	0.00533224
0.64588	-6.884	13.1878	0.00527512
0.64592	-18.65	13.0456	0.00521824
0.64596	-37.32	12.9042	0.00516166
0.646	-0.7565	12.7635	0.00510541
0.64604	3.665	12.6238	0.00504951
0.64608	16.09	12.485	0.004994
0.64612	34.53	12.3473	0.0049389
0.64616	22.51	12.2106	0.00488424
0.6462	37.36	12.0751	0.00483004
0.64624	7.827	11.9408	0.00477633
0.64628	21.84	11.8079	0.00472315
0.64632	20.95	11.6763	0.00467053
0.64636	-2.982	11.5463	0.0046185
0.6464	-9.571	11.4178	0.00456711
0.64644	-24.66	11.2909	0.00451638
0.64648	5.746	11.1659	0.00446634
0.64652	-34.08	11.0426	0.00441703
0.64656	19.94	10.9211	0.00436845
0.6466	4.041	10.8016	0.00432064
0.64664	13.72	10.684	0.00427361
0.64668	38.14	10.5684	0.00422738
0.64672	48.95	10.4549	0.00418196
0.64676	46.61	10.3435	0.00413739
0.6468	11.56	10.2342	0.00409369
0.64684	9.07	10.1272	0.00405088
0.64688	19.19	10.0225	0.00400902
0.64692	7.683	9.92029	0.00396812
0.64696	11.5	9.82056	0.00392822
0.647	-34.66	9.72343	0.00388937
0.64704	-22.69	9.62898	0.00385159
0.64708	15.6	9.53728	0.00381491
0.64712	3.752	9.44841	0.00377936
0.64716	-5.959	9.36241	0.00374496
0.6472	17.62	9.27935	0.00371174
0.64724	23.26	9.19928	0.00367971
0.64728	31.38	9.12226	0.00364891
0.64732	35.46	9.04836	0.00361934
0.64736	-8.733	8.97763	0.00359105
0.6474	-9.138	8.91016	0.00356406
0.64744	-5.583	8.84602	0.00353841
0.64748	-0.8432	8.78528	0.00351411
0.64752	-30.32	8.72799	0.00349119
0.64756	17.36	8.67421	0.00346968
0.6476	7.972	8.62399	0.0034496
0.64764	11.41	8.57737	0.00343095
0.64768	30.17	8.5344	0.00341376
0.64772	17.25	8.49513	0.00339805
0.64776	8.405	8.4596	0.00338384
0.6478	4.243	8.42788	0.00337115
0.64784	15.63	8.40002	0.00336001
0.64788	7.74	8.37608	0.00335043
0.64792	18.9	8.35612	0.00334245
0.64796	14.39	8.34019	0.00333608
0.648	3.174	8.32837	0.00333135
0.64804	17.22	8.32071	0.00332828
0.64808	22.54	8.31727	0.00332691
0.64812	0.3995	8.31813	0.00332725
0.64816	20.23	8.32336	0.00332934
0.6482	45.49	8.33303	0.00333321
0.64824	41.29	8.34721	0.00333888
0.64828	22.65	8.36599	0.0033464
0.64832	10.69	8.38948	0.00335579
0.64836	18.58	8.41778	0.00336711
0.6484	10.57	8.451	0.0033804
0.64844	-0.5831	8.48925	0.0033957
0.64848	18.78	8.53264	0.00341305
0.64852	16.53	8.58128	0.00343251
0.64856	38.61	8.63529	0.00345412
0.6486	29.16	8.6948	0.00347792
0.64864	36.35	8.75992	0.00350397
0.64868	17.48	8.83079	0.00353232
0.64872	33.84	8.90757	0.00356303
0.64876	23.43	8.9904	0.00359616
0.6488	29.3	9.07945	0.00363178
0.64884	23.43	9.17488	0.00366995
0.64888	13.58	9.27687	0.00371075
0.64892	28.66	9.3856	0.00375424
0.64896	13.26	9.50125	0.0038005
0.649	2.596	9.62401	0.00384961
0.64904	-12.78	9.75408	0.00390163
0.64908	-6.479	9.89163	0.00395665
0.64912	12.97	10.0368	0.00401474
0.64916	40.98	10.1899	0.00407597
0.6492	45.95	10.351	0.0041404
0.64924	39.33	10.5203	0.00420813
0.64928	34.21	10.698	0.00427922
0.64932	34.21	10.8844	0.00435376
0.64936	25.89	11.0796	0.00443184
0.6494	6.035	11.2839	0.00451355
0.64944	10.46	11.4975	0.00459899
0.64948	10.25	11.7206	0.00468825
0.64952	10.49	11.9535	0.00478142
0.64956	-11.28	12.1965	0.0048786
0.6496	0.3128	12.4497	0.00497988
0.64964	28.84	12.7134	0.00508535
0.64968	5.428	12.9877	0.00519509
0.64972	2.423	13.273	0.00530921
0.64976	28.61	13.5695	0.00542779
0.6498	33.92	13.8773	0.00555091
0.64984	31.5	14.1967	0.00567867
0.64988	24.04	14.5279	0.00581116
0.64992	26.12	14.8712	0.00594848
0.64996	17.1	15.2268	0.00609072
0.65	15.69	15.595	0.00623799
0.65004	25.57	15.9759	0.00639037
0.65008	2.683	16.3699	0.00654797
0.65012	3.868	16.7773	0.0067109
0.65016	38.29	17.1981	0.00687925
0.6502	39.59	17.6328	0.00705311
0.65024	23.14	18.0815	0.00723259
0.65028	33.69	18.5445	0.0074178
0.65032	26.35	19.0221	0.00760883
0.65036	20.57	19.5145	0.0078058
0.6504	24.88	20.022	0.0080088
0.65044	3.81	20.5449	0.00821796
0.65048	16.5	21.0834	0.00843337
0.65052	24.07	21.6379	0.00865514
0.65056	4.648	22.2085	0.00888339
0.6506	11.01	22.7955	0.00911821
0.65064	21.24	23.3993	0.0093597
0.65068	20.8	24.02	0.00960798
0.65072	40.63	24.6578	0.00986314
0.65076	33.84	25.3132	0.0101253
0.6508	36.32	25.9863	0.0103945
0.65084	19.39	26.6773	0.0106709
0.65088	18.78	27.3866	0.0109546
0.65092	5.255	28.1143	0.0112457
0.65096	17.34	28.8609	0.0115443
0.651	26.09	29.6264	0.0118506
0.65104	-1.306	30.4112	0.0121645
0.65108	6.758	31.2154	0.0124862
0.65112	20.17	32.0394	0.0128158
0.65116	19.85	32.8834	0.0131534
0.6512	35.05	33.7475	0.013499
0.65124	21.24	34.6319	0.0138528
0.65128	34.21	35.537	0.0142148
0.65132	28.06	36.4629	0.0145851
0.65136	29.1	37.4097	0.0149639
0.6514	24.21	38.3778	0.0153511
0.65144	33.69	39.3672	0.0157469
0.65148	22.8	40.3782	0.0161513
0.65152	24.19	41.4111	0.0165644
0.65156	-1.826	42.4658	0.0169863
0.6516	14.42	43.5428	0.0174171
0.65164	-26.88	44.642	0.0178568
0.65168	-50.29	45.7637	0.0183055
0.65172	-0.9299	46.9079	0.0187632
0.65176	-1.999	48.0747	0.0192299
0.6518	-12.46	49.2643	0.0197057
0.65184	24.71	50.4766	0.0201907
0.65188	-12.55	51.7117	0.0206847
0.65192	-8.993	52.9696	0.0211878
0.65196	31.01	54.2502	0.0217001
0.652	-15.96	55.5535	0.0222214
0.65204	-16.07	56.8795	0.0227518
0.65208	-26.28	58.2281	0.0232912
0.65212	14.01	59.5991	0.0238396
0.65216	21.64	60.9924	0.024397
0.6522	5.11	62.408	0.0249632
0.65224	-11.39	63.8454	0.0255382
0.65228	-24.34	65.3047	0.0261219
0.65232	14.53	66.7855	0.0267142
0.65236	-23.36	68.2876	0.0273151
0.6524	26.58	69.8107	0.0279243
0.65244	35.14	71.3545	0.0285418
0.65248	-34.98	72.9186	0.0291674
0.65252	-39.74	74.5027	0.0298011
0.65256	-49.37	76.1063	0.0304425
0.6526	-35.09	77.7291	0.0310916
0.65264	-64.71	79.3705	0.0317482
0.65268	-58.24	81.03	0.032412
0.65272	21.27	82.7069	0.0330828
0.65276	29.79	84.4008	0.0337603
0.6528	9.561	86.1107	0.0344443
0.65284	55.83	87.8362	0.0351345
0.65288	99.18	89.5764	0.0358306
0.65292	54.96	91.3307	0.0365323
0.65296	83.78	93.0982	0.0372393
0.653	73.17	94.8782	0.0379513
0.65304	50.08	96.67	0.038668
0.65308	2.914	98.4728	0.0393891
0.65312	-46.51	100.286	0.0401143
0.65316	-68.18	102.108	0.0408432
0.6532	-10.67	103.939	0.0415756
0.65324	-16.42	105.777	0.0423109
0.65328	-9.831	107.622	0.0430489
0.65332	42.36	109.473	0.0437891
0.65336	29.94	111.328	0.044531
0.6534	56.15	113.186	0.0452743
0.65344	103	115.046	0.0460184
0.65348	72.54	116.907	0.046763
0.65352	35.08	118.769	0.0475074
0.65356	-21.33	120.628	0.0482514
0.6536	-30.18	122.486	0.0489942
0.65364	-46.68	124.339	0.0497355
0.65368	-47.26	126.187	0.0504747
0.65372	-42.11	128.028	0.0512112
0.65376	-55.52	129.861	0.0519445
0.6538	-36.88	131.685	0.0526739
0.65384	29.27	133.497	0.0533987
0.65388	8.29	135.296	0.0541184
0.65392	9.995	137.08	0.0548322
0.65396	36.61	138.848	0.0555393
0.654	36.24	140.598	0.0562391
0.65404	58.61	142.327	0.0569308
0.65408	30.34	144.034	0.0576136
0.65412	-1.335	145.717	0.0582868
0.65416	-4.889	147.374	0.0589496
0.6542	-15.55	149.003	0.0596011
0.65424	-26.25	150.601	0.0602404
0.65428	-6.132	152.167	0.0608668
0.65432	13.35	153.698	0.0614793
0.65436	-11.65	155.193	0.062077
0.6544	20.57	156.647	0.062659
0.65444	31.06	158.06	0.0632242
0.65448	47.86	159.429	0.0637716
0.65452	10.66	160.751	0.0643003
0.65456	7.654	162.023	0.0648093
0.6546	81.96	163.243	0.0652974
0.65464	328.3	164.409	0.0657636
0.65468	656.1	165.517	0.0662067
0.65472	878.7	166.565	0.0666259
0.65476	1084	167.55	0.06702
0.6548	1235	168.471	0.0673882
0.65484	1412	169.325	0.0677299
0.65488	1460	170.111	0.0680444
0.65492	1488	170.828	0.0683314
0.65496	1533	171.477	0.0685907
0.655	1396	172.056	0.0688225
0.65504	1238	172.567	0.0690268
0.65508	1032	173.011	0.0692043
0.65512	848	173.389	0.0693555
0.65516	794.6	173.703	0.0694813
0.6552	716.9	173.956	0.0695823
0.65524	575.9	174.149	0.0696597
0.65528	459.2	174.286	0.0697145
0.65532	372.7	174.37	0.0697478
0.65536	301.5	174.402	0.0697608
0.6554	171.6	174.387	0.0697547
0.65544	138.4	174.327	0.0697306
0.65548	166.9	174.225	0.0696899
0.65552	30.95	174.084	0.0696337
0.65556	-48.3	173.908	0.0695633
0.6556	-135.7	173.7	0.0694799
0.65564	-188	173.461	0.0693845
0.65568	-200.3	173.196	0.0692783
0.65572	-153.2	172.906	0.0691625
0.65576	-67.92	172.595	0.0690378
0.6558	29.73	172.264	0.0689054
0.65584	69.01	171.915	0.0687661
0.65588	73.2	171.552	0.0686209
0.65592	48.38	171.176	0.0684705
0.65596	46.27	170.79	0.0683158
0.656	34.24	170.394	0.0681577
0.65604	16.01	169.992	0.067997
0.65608	-7.086	169.586	0.0678344
0.65612	-9.022	169.177	0.0676707
0.65616	2.654	168.767	0.0675067
0.6562	-13.62	168.358	0.067343
0.65624	-12.46	167.951	0.0671804
0.65628	73.4	167.549	0.0670195
0.65632	109.3	167.152	0.0668609
0.65636	155.9	166.763	0.0667052
0.6564	178	166.383	0.0665531
0.65644	222.2	166.013	0.0664051
0.65648	179.8	165.655	0.0662618
0.65652	127.2	165.31	0.0661239
0.65656	63.06	164.98	0.0659919
0.6566	-28.18	164.666	0.0658665
0.65664	-45.38	164.37	0.0657482
0.65668	-32.78	164.094	0.0656376
0.65672	-13.21	163.838	0.0655352
0.65676	34.16	163.604	0.0654415
0.6568	48.84	163.392	0.0653569
0.65684	-4.022	163.205	0.065282
0.65688	15.51	163.043	0.0652171
0.65692	55.37	162.907	0.0651627
0.65696	-24.92	162.798	0.065119
0.657	-39.72	162.716	0.0650866
0.65704	35.63	162.664	0.0650656
0.65708	2.654	162.641	0.0650564
0.65712	-21.94	162.648	0.0650593
0.65716	-35	162.686	0.0650745
0.6572	-91.1	162.755	0.0651022
0.65724	-51.19	162.857	0.0651426
0.65728	47.07	162.99	0.0651959
0.65732	23.03	163.156	0.0652622
0.65736	39.36	163.354	0.0653416
0.6574	109.4	163.585	0.0654341
0.65744	69.33	163.85	0.0655399
0.65748	47.16	164.147	0.0656589
0.65752	50.14	164.478	0.0657911
0.65756	42.02	164.842	0.0659367
0.6576	29.85	165.239	0.0660956
0.65764	47.07	165.669	0.0662677
0.65768	56.41	166.132	0.066453
0.65772	63.4	166.629	0.0666515
0.65776	42.19	167.157	0.066863
0.6578	51.76	167.719	0.0670875
0.65784	78.29	168.312	0.0673248
0.65788	83.14	168.937	0.0675748
0.65792	56.01	169.593	0.0678373
0.65796	80.69	170.281	0.0681123
0.658	88.14	170.998	0.0683994
0.65804	92.51	171.746	0.0686984
0.65808	109	172.523	0.0690093
0.65812	108.4	173.329	0.0693317
0.65816	74.04	174.164	0.0696654
0.6582	87.88	175.026	0.0700102
0.65824	82.22	175.915	0.0703658
0.65828	80.4	176.83	0.0707319
0.65832	80.8	177.771	0.0711083
0.65836	85.57	178.736	0.0714945
0.6584	57.54	179.726	0.0718904
0.65844	61.35	180.739	0.0722955
0.65848	31.93	181.774	0.0727095
0.65852	13.09	182.83	0.073132
0.65856	48.58	183.907	0.0735627
0.6586	65.28	185.003	0.074001
0.65864	63.17	186.117	0.0744467
0.65868	101.7	187.248	0.074899
0.65872	86.52	188.394	0.0753577
0.65876	63.14	189.556	0.0758222
0.6588	44.33	190.73	0.076292
0.65884	-21.8	191.916	0.0767665
0.65888	-19.89	193.113	0.0772451
0.65892	14.36	194.318	0.0777274
0.65896	59.01	195.531	0.0782125
0.659	124.1	196.75	0.0787
0.65904	191.3	197.973	0.0791891
0.65908	229.3	199.198	0.0796791
0.65912	247.1	200.424	0.0801694
0.65916	250.4	201.648	0.0806592
0.6592	232.4	202.87	0.0811479
0.65924	192.4	204.087	0.0816348
0.65928	162.9	205.298	0.0821193
0.65932	223.9	206.501	0.0826006
0.65936	335	207.695	0.0830781
0.6594	463.8	208.878	0.0835511
0.65944	552.3	210.047	0.084019
0.65948	655.9	211.203	0.0844811
0.65952	687.6	212.343	0.084937
0.65956	751.7	213.465	0.0853862
0.6596	802.3	214.57	0.0858282
0.65964	819.9	215.657	0.0862626
0.65968	775.2	216.724	0.0866894
0.65972	675.1	217.771	0.0871083
0.65976	584.7	218.798	0.0875193
0.6598	462.2	219.806	0.0879225
0.65984	359.8	220.794	0.0883178
0.65988	318.7	221.763	0.0887054
0.65992	418.3	222.714	0.0890855
0.65996	526.1	223.645	0.0894581
0.66	441.3	224.559	0.0898236
0.66004	380	225.455	0.0901822
0.66008	413.6	226.335	0.0905341
0.66012	375.2	227.199	0.0908796
0.66016	282.8	228.048	0.0912191
0.6602	187.4	228.882	0.0915528
0.66024	106.6	229.703	0.0918813
0.66028	76.06	230.512	0.0922047
0.66032	6.527	231.309	0.0925235
0.66036	-78.01	232.095	0.0928379
0.6604	-60.78	232.871	0.0931483
0.66044	-36.54	233.637	0.0934548
0.66048	-28.18	234.394	0.0937576
0.66052	34.91	235.142	0.0940569
0.66056	116.8	235.882	0.0943528
0.6606	211.1	236.613	0.0946453
0.66064	257.4	237.336	0.0949345
0.66068	330.8	238.051	0.0952204
0.66072	337.9	238.758	0.0955031
0.66076	364.1	239.457	0.0957826
0.6608	309.4	240.148	0.0960591
0.66084	201.5	240.831	0.0963326
0.66088	163.8	241.508	0.0966031
0.66092	192.1	242.177	0.0968709
0.66096	141.6	242.84	0.0971359
0.661	165.3	243.496	0.0973983
0.66104	249.9	244.145	0.0976581
0.66108	244.2	244.789	0.0979154
0.66112	226.1	245.426	0.0981702
0.66116	202.8	246.057	0.0984226
0.6612	230.4	246.682	0.0986726
0.66124	235.9	247.301	0.0989203
0.66128	217.6	247.914	0.0991657
0.66132	252.2	248.522	0.0994088
0.66136	254.7	249.124	0.0996497
0.6614	199.4	249.721	0.0998884
0.66144	122	250.312	0.100125
0.66148	133.4	250.898	0.100359
0.66152	147.2	251.479	0.100591
0.66156	77.97	252.054	0.100821
0.6616	95.63	252.623	0.101049
0.66164	145.5	253.187	0.101275
0.66168	149.9	253.745	0.101498
0.66172	191.6	254.297	0.101719
0.66176	176.3	254.843	0.101937
0.6618	273.3	255.382	0.102153
0.66184	265.2	255.914	0.102365
0.66188	169.9	256.438	0.102575
0.66192	223.8	256.955	0.102782
0.66196	250.3	257.463	0.102985
0.662	339.3	257.963	0.103185
0.66204	428.4	258.455	0.103382
0.66208	485	258.937	0.103575
0.66212	519.1	259.409	0.103764
0.66216	596.6	259.872	0.103949
0.6622	640.1	260.325	0.10413
0.66224	638	260.768	0.104307
0.66228	612	261.202	0.104481
0.66232	593.7	261.627	0.104651
0.66236	500.9	262.043	0.104817
0.6624	424	262.45	0.10498
0.66244	302.4	262.851	0.10514
0.66248	196.1	263.244	0.105298
0.66252	176.9	263.632	0.105453
0.66256	138.6	264.014	0.105606
0.6626	69.7	264.392	0.105757
0.66264	45.63	264.766	0.105907
0.66268	54.73	265.137	0.106055
0.66272	48.03	265.506	0.106202
0.66276	95.46	265.872	0.106349
0.6628	119.3	266.236	0.106494
0.66284	149.9	266.598	0.106639
0.66288	186.7	266.959	0.106784
0.66292	186	267.319	0.106928
0.66296	173.4	267.678	0.107071
0.663	149.9	268.036	0.107214
0.66304	156.9	268.392	0.107357
0.66308	137.3	268.748	0.107499
0.66312	125.2	269.103	0.107641
0.66316	108.1	269.457	0.107783
0.6632	73.87	269.809	0.107924
0.66324	132.5	270.16	0.108064
0.66328	158	270.51	0.108204
0.66332	213.7	270.858	0.108343
0.66336	230.4	271.203	0.108481
0.6634	249.1	271.545	0.108618
0.66344	313.1	271.884	0.108754
0.66348	301.2	272.22	0.108888
0.66352	306.4	272.551	0.109021
0.66356	302.7	272.879	0.109151
0.6636	342.2	273.201	0.10928
0.66364	361.8	273.518	0.109407
0.66368	372.3	273.83	0.109532
0.66372	410.9	274.136	0.109654
0.66376	380.2	274.436	0.109774
0.6638	372.2	274.729	0.109892
0.66384	362.6	275.016	0.110007
0.66388	369.9	275.297	0.110119
0.66392	424.8	275.57	0.110228
0.66396	424.6	275.837	0.110335
0.664	436	276.098	0.110439
0.66404	449.1	276.351	0.11054
0.66408	451.3	276.598	0.110639
0.66412	412.3	276.838	0.110735
0.66416	413.9	277.073	0.110829
0.6642	401.1	277.301	0.11092
0.66424	386.3	277.524	0.11101
0.66428	341.2	277.742	0.111097
0.66432	295.8	277.955	0.111182
0.66436	239.2	278.164	0.111266
0.6644	212.6	278.37	0.111348
0.66444	196.7	278.572	0.111429
0.66448	139.8	278.771	0.111509
0.66452	161.6	278.969	0.111587
0.66456	132.2	279.164	0.111665
0.6646	131.5	279.357	0.111743
0.66464	131.9	279.549	0.11182
0.66468	105.1	279.74	0.111896
0.66472	150.3	279.93	0.111972
0.66476	145.7	280.119	0.112047
0.6648	179.4	280.307	0.112123
0.66484	177.7	280.493	0.112197
0.66488	200.7	280.679	0.112272
0.66492	186.9	280.863	0.112345
0.66496	193.4	281.047	0.112419
0.665	205.7	281.228	0.112491
0.66504	244.3	281.408	0.112563
0.66508	309.2	281.586	0.112634
0.66512	379.8	281.761	0.112704
0.66516	432.7	281.934	0.112774
0.6652	468.1	282.104	0.112842
0.66524	514.6	282.272	0.112909
0.66528	513.1	282.436	0.112974
0.66532	482.1	282.597	0.113039
0.66536	478.3	282.756	0.113102
0.6654	443.7	282.912	0.113165
0.66544	406.1	283.066	0.113226
0.66548	355.4	283.217	0.113287
0.66552	333.9	283.367	0.113347
0.66556	342	283.515	0.113406
0.6656	287.1	283.663	0.113465
0.66564	254.3	283.81	0.113524
0.66568	227.3	283.957	0.113583
0.66572	210.6	284.104	0.113642
0.66576	162.9	284.252	0.113701
0.6658	144	284.401	0.113761
0.66584	127.5	284.552	0.113821
0.66588	101.2	284.705	0.113882
0.66592	126.4	284.859	0.113944
0.66596	151.6	285.016	0.114006
0.666	171.2	285.175	0.11407
0.66604	240.7	285.336	0.114135
0.66608	251.7	285.5	0.1142
0.66612	296.5	285.665	0.114266
0.66616	301.1	285.833	0.114333
0.6662	345.7	286.003	0.114401
0.66624	350.5	286.175	0.11447
0.66628	389.1	286.349	0.11454
0.66632	407.6	286.525	0.11461
0.66636	380.8	286.703	0.114681
0.6664	419.5	286.884	0.114754
0.66644	429.9	287.067	0.114827
0.66648	449.7	287.252	0.114901
0.66652	440.2	287.441	0.114976
0.66656	441.4	287.632	0.115053
0.6666	407.3	287.827	0.115131
0.66664	368.9	288.026	0.11521
0.66668	339.8	288.229	0.115292
0.66672	295.5	288.437	0.115375
0.66676	280	288.65	0.11546
0.6668	267.8	288.87	0.115548
0.66684	282	289.096	0.115638
0.66688	275.9	289.329	0.115731
0.66692	298.3	289.569	0.115828
0.66696	255.5	289.818	0.115927
0.667	216.9	290.075	0.11603
0.66704	210.1	290.341	0.116136
0.66708	192.1	290.617	0.116247
0.66712	182.8	290.902	0.116361
0.66716	187.1	291.198	0.116479
0.6672	160.6	291.505	0.116602
0.66724	124.2	291.823	0.116729
0.66728	150.4	292.152	0.116861
0.66732	114.1	292.493	0.116997
0.66736	110.2	292.845	0.117138
0.6674	99.85	293.209	0.117284
0.66744	88.63	293.585	0.117434
0.66748	101.7	293.973	0.117589
0.66752	73.78	294.372	0.117749
0.66756	45.31	294.782	0.117913
0.6676	53.38	295.203	0.118081
0.66764	55.49	295.635	0.118254
0.66768	90.74	296.076	0.11843
0.66772	104	296.527	0.118611
0.66776	155.8	296.987	0.118795
0.6678	189.8	297.455	0.118982
0.66784	223.1	297.929	0.119172
0.66788	280.5	298.41	0.119364
0.66792	345.5	298.896	0.119559
0.66796	403.7	299.387	0.119755
0.668	469.8	299.882	0.119953
0.66804	540	300.379	0.120151
0.66808	604.5	300.878	0.120351
0.66812	646.3	301.378	0.120551
0.66816	660.8	301.879	0.120752
0.6682	657.8	302.38	0.120952
0.66824	580.6	302.881	0.121153
0.66828	557.5	303.383	0.121353
0.66832	540.8	303.884	0.121553
0.66836	490.2	304.384	0.121754
0.6684	477.6	304.885	0.121954
0.66844	456.7	305.386	0.122155
0.66848	397.7	305.888	0.122355
0.66852	315.7	306.391	0.122556
0.66856	226.2	306.895	0.122758
0.6686	202.1	307.401	0.12296
0.66864	155.1	307.909	0.123163
0.66868	126	308.419	0.123368
0.66872	151.9	308.932	0.123573
0.66876	161.6	309.447	0.123779
0.6688	122	309.966	0.123986
0.66884	145	310.488	0.124195
0.66888	150	311.013	0.124405
0.66892	117.3	311.541	0.124616
0.66896	182.1	312.072	0.124829
0.669	190.6	312.606	0.125042
0.66904	203.1	313.142	0.125257
0.66908	228.7	313.68	0.125472
0.66912	194.1	314.22	0.125688
0.66916	185	314.762	0.125905
0.6692	197.6	315.304	0.126122
0.66924	209.1	315.847	0.126339
0.66928	236	316.39	0.126556
0.66932	326.5	316.932	0.126773
0.66936	360.6	317.473	0.126989
0.6694	414.4	318.013	0.127205
0.66944	473.3	318.55	0.12742
0.66948	474.7	319.084	0.127634
0.66952	526.7	319.615	0.127846
0.66956	546.1	320.142	0.128057
0.6696	565.6	320.665	0.128266
0.66964	576.5	321.183	0.128473
0.66968	587.5	321.697	0.128679
0.66972	607.7	322.207	0.128883
0.66976	601.3	322.712	0.129085
0.6698	565.2	323.213	0.129285
0.66984	535.6	323.709	0.129484
0.66988	474.6	324.202	0.129681
0.66992	418.5	324.692	0.129877
0.66996	372.2	325.179	0.130072
0.67	315.1	325.664	0.130266
0.67004	293.6	326.148	0.130459
0.67008	219.8	326.63	0.130652
0.67012	202.6	327.112	0.130845
0.67016	200.8	327.594	0.131038
0.6702	135.1	328.076	0.131231
0.67024	81.7	328.56	0.131424
0.67028	84.73	329.045	0.131618
0.67032	89.94	329.531	0.131812
0.67036	84.88	330.019	0.132007
0.6704	115.9	330.508	0.132203
0.67044	144	330.999	0.1324
0.67048	179.8	331.492	0.132597
0.67052	193.6	331.986	0.132794
0.67056	214.9	332.481	0.132992
0.6706	240.1	332.977	0.133191
0.67064	276.7	333.473	0.133389
0.67068	322.2	333.97	0.133588
0.67072	371.1	334.466	0.133786
0.67076	424.8	334.961	0.133984
0.6708	443.9	335.454	0.134182
0.67084	474.8	335.946	0.134379
0.67088	492.7	336.436	0.134575
0.67092	496.8	336.924	0.13477
0.67096	534.7	337.41	0.134964
0.671	559.7	337.892	0.135157
0.67104	537.8	338.372	0.135349
0.67108	549.1	338.85	0.13554
0.67112	520	339.324	0.13573
0.67116	509.9	339.796	0.135919
0.6712	462.7	340.266	0.136107
0.67124	445.9	340.735	0.136294
0.67128	411.9	341.201	0.13648
0.67132	407.9	341.667	0.136667
0.67136	376.2	342.131	0.136852
0.6714	373.7	342.596	0.137038
0.67144	363.1	343.06	0.137224
0.67148	335.2	343.525	0.13741
0.67152	309.8	343.992	0.137597
0.67156	306.3	344.46	0.137784
0.6716	278.7	344.93	0.137972
0.67164	293.7	345.403	0.138161
0.67168	338.4	345.879	0.138352
0.67172	314.5	346.358	0.138543
0.67176	316.5	346.841	0.138736
0.6718	299	347.328	0.138931
0.67184	329.6	347.82	0.139128
0.67188	315.4	348.317	0.139327
0.67192	312.4	348.819	0.139528
0.67196	326.1	349.327	0.139731
0.672	384.7	349.841	0.139936
0.67204	394.1	350.361	0.140145
0.67208	350.7	350.888	0.140355
0.67212	325.4	351.422	0.140569
0.67216	351.9	351.964	0.140785
0.6722	400.7	352.513	0.141005
0.67224	372.7	353.07	0.141228
0.67228	348.6	353.635	0.141454
0.67232	383.2	354.21	0.141684
0.67236	400.5	354.793	0.141917
0.6724	380.4	355.386	0.142154
0.67244	319.9	355.989	0.142396
0.67248	320.7	356.602	0.142641
0.67252	380.7	357.226	0.142891
0.67256	374.9	357.862	0.143145
0.6726	347.2	358.508	0.143403
0.67264	346.2	359.167	0.143667
0.67268	358.9	359.837	0.143935
0.67272	346.6	360.521	0.144208
0.67276	304.2	361.217	0.144487
0.6728	283.5	361.927	0.144771
0.67284	285	362.651	0.14506
0.67288	270.9	363.389	0.145355
0.67292	310.9	364.141	0.145656
0.67296	263.4	364.907	0.145963
0.673	269.1	365.689	0.146276
0.67304	228.8	366.486	0.146594
0.67308	256.6	367.298	0.146919
0.67312	272.1	368.125	0.14725
0.67316	245.4	368.967	0.147587
0.6732	236.1	369.825	0.14793
0.67324	247	370.698	0.148279
0.67328	280.1	371.587	0.148635
0.67332	283.1	372.491	0.148996
0.67336	277.9	373.409	0.149364
0.6734	301.1	374.343	0.149737
0.67344	324.4	375.291	0.150116
0.67348	411.2	376.253	0.150501
0.67352	446.8	377.229	0.150892
0.67356	466.2	378.219	0.151288
0.6736	486	379.222	0.151689
0.67364	457.2	380.239	0.152096
0.67368	489.2	381.269	0.152508
0.67372	500.2	382.311	0.152925
0.67376	483.4	383.367	0.153347
0.6738	484.2	384.435	0.153774
0.67384	449.2	385.516	0.154206
0.67388	441.1	386.61	0.154644
0.67392	420.1	387.716	0.155087
0.67396	397.4	388.836	0.155534
0.674	388.6	389.968	0.155987
0.67404	352.7	391.114	0.156446
0.67408	298.3	392.273	0.156909
0.67412	301.2	393.444	0.157378
0.67416	241.9	394.63	0.157852
0.6742	244.2	395.828	0.158331
0.67424	229	397.04	0.158816
0.67428	227.9	398.264	0.159306
0.67432	227.9	399.502	0.159801
0.67436	260.5	400.752	0.160301
0.6744	263.5	402.014	0.160806
0.67444	282.4	403.288	0.161315
0.67448	310.5	404.574	0.16183
0.67452	357.9	405.871	0.162348
0.67456	381.8	407.178	0.162871
0.6746	412.5	408.495	0.163398
0.67464	430.8	409.822	0.163929
0.67468	462.4	411.157	0.164463
0.67472	486.1	412.501	0.165
0.67476	504.1	413.852	0.165541
0.6748	542.1	415.211	0.166084
0.67484	550.1	416.577	0.166631
0.67488	577.7	417.949	0.16718
0.67492	599.6	419.327	0.167731
0.67496	580.5	420.711	0.168285
0.675	594.1	422.101	0.16884
0.67504	593.9	423.496	0.169398
0.67508	594.9	424.897	0.169959
0.67512	583.7	426.302	0.170521
0.67516	562.8	427.714	0.171085
0.6752	543.2	429.13	0.171652
0.67524	519.8	430.553	0.172221
0.67528	492.3	431.981	0.172792
0.67532	506.4	433.416	0.173366
0.67536	522.1	434.857	0.173943
0.6754	471	436.304	0.174522
0.67544	447	437.759	0.175104
0.67548	419.1	439.221	0.175688
0.67552	398.2	440.691	0.176276
0.67556	365.4	442.168	0.176867
0.6756	345.2	443.655	0.177462
0.67564	343.2	445.149	0.17806
0.67568	305.6	446.653	0.178661
0.67572	282.1	448.166	0.179267
0.67576	276.1	449.689	0.179875
0.6758	250.7	451.221	0.180488
0.67584	275.9	452.762	0.181105
0.67588	257.3	454.312	0.181725
0.67592	277.2	455.872	0.182349
0.67596	312.4	457.441	0.182977
0.676	295.9	459.019	0.183608
0.67604	320.2	460.605	0.184242
0.67608	360.3	462.2	0.18488
0.67612	358.8	463.802	0.185521
0.67616	401.1	465.411	0.186164
0.6762	445.2	467.027	0.186811
0.67624	496.1	468.648	0.187459
0.67628	496.4	470.276	0.18811
0.67632	548.2	471.908	0.188763
0.67636	570	473.545	0.189418
0.6764	597.8	475.185	0.190074
0.67644	616.3	476.829	0.190732
0.67648	646.6	478.476	0.19139
0.67652	653.3	480.126	0.19205
0.67656	648	481.778	0.192711
0.6766	648.9	483.432	0.193373
0.67664	632.8	485.088	0.194035
0.67668	650	486.746	0.194698
0.67672	621.4	488.405	0.195362
0.67676	571.1	490.066	0.196027
0.6768	543.2	491.729	0.196692
0.67684	532.9	493.395	0.197358
0.67688	509.4	495.062	0.198025
0.67692	460.6	496.731	0.198692
0.67696	503.7	498.403	0.199361
0.677	444.2	500.077	0.200031
0.67704	455.1	501.753	0.200701
0.67708	443.4	503.433	0.201373
0.67712	428.6	505.115	0.202046
0.67716	423.7	506.8	0.20272
0.6772	411	508.488	0.203395
0.67724	405.5	510.179	0.204072
0.67728	386.8	511.873	0.204749
0.67732	387.9	513.569	0.205428
0.67736	390.1	515.268	0.206107
0.6774	394.9	516.97	0.206788
0.67744	421	518.674	0.20747
0.67748	432.6	520.38	0.208152
0.67752	448.2	522.087	0.208835
0.67756	449.4	523.796	0.209519
0.6776	494.5	525.506	0.210202
0.67764	492	527.217	0.210887
0.67768	520.8	528.927	0.211571
0.67772	546.6	530.637	0.212255
0.67776	521.3	532.347	0.212939
0.6778	560.3	534.055	0.213622
0.67784	594.3	535.762	0.214305
0.67788	608.1	537.467	0.214987
0.67792	626.9	539.169	0.215668
0.67796	660.3	540.869	0.216348
0.678	635.8	542.565	0.217026
0.67804	665.6	544.258	0.217703
0.67808	667.9	545.948	0.218379
0.67812	666.2	547.633	0.219053
0.67816	682.4	549.315	0.219726
0.6782	667.6	550.992	0.220397
0.67824	654.9	552.666	0.221066
0.67828	650.7	554.335	0.221734
0.67832	635.2	556	0.2224
0.67836	612.6	557.66	0.223064
0.6784	583.4	559.317	0.223727
0.67844	561.2	560.97	0.224388
0.67848	562.3	562.619	0.225048
0.67852	526.6	564.265	0.225706
0.67856	505.3	565.907	0.226363
0.6786	509.8	567.546	0.227018
0.67864	473.7	569.181	0.227672
0.67868	495.5	570.813	0.228325
0.67872	477.5	572.442	0.228977
0.67876	496.6	574.068	0.229627
0.6788	518.9	575.691	0.230276
0.67884	536.2	577.31	0.230924
0.67888	541.5	578.926	0.23157
0.67892	586.4	580.538	0.232215
0.67896	583.8	582.147	0.232859
0.679	612.3	583.752	0.233501
0.67904	644.6	585.354	0.234141
0.67908	649.6	586.951	0.23478
0.67912	635.4	588.545	0.235418
0.67916	634.1	590.134	0.236054
0.6792	638.4	591.719	0.236688
0.67924	604.7	593.3	0.23732
0.67928	584.8	594.878	0.237951
0.67932	561.3	596.45	0.23858
0.67936	554.9	598.019	0.239208
0.6794	533	599.584	0.239834
0.67944	546.7	601.144	0.240458
0.67948	527.2	602.701	0.24108
0.67952	540.7	604.252	0.241701
0.67956	549.6	605.8	0.24232
0.6796	548.3	607.343	0.242937
0.67964	562.7	608.881	0.243552
0.67968	579.3	610.414	0.244166
0.67972	606.2	611.942	0.244777
0.67976	631.9	613.465	0.245386
0.6798	653	614.982	0.245993
0.67984	695	616.494	0.246597
0.67988	723.7	617.999	0.2472
0.67992	737.3	619.499	0.247799
0.67996	760.3	620.992	0.248397
0.68	762.3	622.479	0.248992
0.68004	746.4	623.96	0.249584
0.68008	713.4	625.434	0.250174
0.68012	710.8	626.902	0.250761
0.68016	677.6	628.365	0.251346
0.6802	662.1	629.821	0.251928
0.68024	631.3	631.272	0.252509
0.68028	609.4	632.717	0.253087
0.68032	590.2	634.156	0.253663
0.68036	575.9	635.591	0.254236
0.6804	570.6	637.02	0.254808
0.68044	572.5	638.445	0.255378
0.68048	580.3	639.865	0.255946
0.68052	597.4	641.28	0.256512
0.68056	603.1	642.69	0.257076
0.6806	606.4	644.096	0.257638
0.68064	626.9	645.497	0.258199
0.68068	643.6	646.894	0.258758
0.68072	678.4	648.286	0.259314
0.68076	674.6	649.674	0.25987
0.6808	690.4	651.057	0.260423
0.68084	692.1	652.436	0.260974
0.68088	715.2	653.81	0.261524
0.68092	725.3	655.18	0.262072
0.68096	698.8	656.545	0.262618
0.681	674	657.907	0.263163
0.68104	656.5	659.264	0.263706
0.68108	628.2	660.617	0.264247
0.68112	611	661.967	0.264787
0.68116	589.1	663.313	0.265325
0.6812	570.8	664.655	0.265862
0.68124	545.5	665.993	0.266397
0.68128	544.5	667.329	0.266931
0.68132	559.3	668.66	0.267464
0.68136	564.2	669.988	0.267995
0.6814	575.3	671.312	0.268525
0.68144	603.5	672.633	0.269053
0.68148	628	673.949	0.26958
0.68152	638.8	675.261	0.270105
0.68156	688.9	676.569	0.270628
0.6816	704.3	677.872	0.271149
0.68164	708	679.17	0.271668
0.68168	714.7	680.463	0.272185
0.68172	757.6	681.75	0.2727
0.68176	743.4	683.032	0.273213
0.6818	770.4	684.308	0.273723
0.68184	751.6	685.577	0.274231
0.68188	719.8	686.841	0.274737
0.68192	718.7	688.099	0.27524
0.68196	725.9	689.35	0.27574
0.682	743.7	690.595	0.276238
0.68204	684.4	691.834	0.276734
0.68208	670.4	693.066	0.277226
0.68212	689.7	694.292	0.277717
0.68216	702.9	695.511	0.278204
0.6822	703.2	696.724	0.278689
0.68224	670.4	697.93	0.279172
0.68228	676.6	699.129	0.279652
0.68232	715.5	700.322	0.280129
0.68236	739.6	701.507	0.280603
0.6824	754.7	702.687	0.281075
0.68244	734.1	703.859	0.281544
0.68248	752.1	705.024	0.28201
0.68252	771.6	706.183	0.282473
0.68256	777.7	707.334	0.282934
0.6826	724.1	708.479	0.283392
0.68264	727.8	709.617	0.283847
0.68268	715	710.748	0.284299
0.68272	744.8	711.873	0.284749
0.68276	750.6	712.991	0.285196
0.6828	706	714.103	0.285641
0.68284	670.7	715.208	0.286083
0.68288	647.9	716.307	0.286523
0.68292	688.2	717.4	0.28696
0.68296	684.2	718.487	0.287395
0.683	656.7	719.567	0.287827
0.68304	678	720.642	0.288257
0.68308	692.5	721.711	0.288684
0.68312	699.3	722.773	0.289109
0.68316	706	723.83	0.289532
0.6832	708.5	724.881	0.289952
0.68324	693.1	725.925	0.29037
0.68328	739	726.963	0.290785
0.68332	734.8	727.996	0.291198
0.68336	792.3	729.021	0.291609
0.6834	784.1	730.041	0.292016
0.68344	816.4	731.054	0.292422
0.68348	795.2	732.061	0.292825
0.68352	790.2	733.062	0.293225
0.68356	796	734.057	0.293623
0.6836	773.7	735.045	0.294018
0.68364	781.9	736.028	0.294411
0.68368	754	737.004	0.294802
0.68372	756.5	737.975	0.29519
0.68376	734.4	738.94	0.295576
0.6838	750.6	739.899	0.29596
0.68384	713.5	740.854	0.296341
0.68388	725.3	741.803	0.296721
0.68392	698.5	742.747	0.297099
0.68396	689.9	743.686	0.297474
0.684	684	744.621	0.297848
0.68404	673.3	745.55	0.29822
0.68408	730.6	746.475	0.29859
0.68412	709.3	747.396	0.298958
0.68416	732.9	748.312	0.299325
0.6842	735.4	749.224	0.299689
0.68424	735.5	750.131	0.300052
0.68428	750.8	751.034	0.300413
0.68432	734.5	751.932	0.300773
0.68436	771	752.826	0.30113
0.6844	743.5	753.715	0.301486
0.68444	756.3	754.6	0.30184
0.68448	750.3	755.481	0.302192
0.68452	738.6	756.357	0.302543
0.68456	723	757.228	0.302891
0.6846	729.9	758.096	0.303238
0.68464	729.2	758.959	0.303583
0.68468	715.3	759.817	0.303927
0.68472	710.2	760.671	0.304268
0.68476	719.1	761.52	0.304608
0.6848	723.9	762.365	0.304946
0.68484	735.1	763.204	0.305282
0.68488	749.1	764.039	0.305616
0.68492	779.2	764.869	0.305948
0.68496	776.4	765.694	0.306278
0.685	819.1	766.514	0.306606
0.68504	818.4	767.328	0.306931
0.68508	840.1	768.137	0.307255
0.68512	871.9	768.94	0.307576
0.68516	847.3	769.738	0.307895
0.6852	852.7	770.53	0.308212
0.68524	849.2	771.317	0.308527
0.68528	860.3	772.098	0.308839
0.68532	856.9	772.874	0.30915
0.68536	839.4	773.644	0.309458
0.6854	796.2	774.41	0.309764
0.68544	797.1	775.17	0.310068
0.68548	791.9	775.926	0.31037
0.68552	753.3	776.677	0.310671
0.68556	770.3	777.423	0.310969
0.6856	718.5	778.166	0.311266
0.68564	712.1	778.904	0.311562
0.68568	702	779.639	0.311856
0.68572	695.5	780.37	0.312148
0.68576	715.8	781.097	0.312439
0.6858	702.5	781.821	0.312728
0.68584	718.4	782.541	0.313017
0.68588	747.2	783.258	0.313303
0.68592	747.5	783.972	0.313589
0.68596	767.3	784.682	0.313873
0.686	766.9	785.389	0.314156
0.68604	799.6	786.092	0.314437
0.68608	812.8	786.792	0.314717
0.68612	802.5	787.487	0.314995
0.68616	814.1	788.18	0.315272
0.6862	816.9	788.868	0.315547
0.68624	840.6	789.553	0.315821
0.68628	819	790.235	0.316094
0.68632	832	790.912	0.316365
0.68636	806.4	791.586	0.316635
0.6864	799.5	792.257	0.316903
0.68644	767.3	792.924	0.317169
0.68648	760	793.587	0.317435
0.68652	749.3	794.247	0.317699
0.68656	744.2	794.903	0.317961
0.6866	747.3	795.556	0.318222
0.68664	724.8	796.206	0.318482
0.68668	755.5	796.852	0.318741
0.68672	741.1	797.494	0.318998
0.68676	756.5	798.133	0.319253
0.6868	770.5	798.768	0.319507
0.68684	776	799.4	0.31976
0.68688	795.2	800.027	0.320011
0.68692	825.2	800.65	0.32026
0.68696	835.7	801.27	0.320508
0.687	847.8	801.884	0.320754
0.68704	849.4	802.495	0.320998
0.68708	855.7	803.101	0.32124
0.68712	869.3	803.702	0.321481
0.68716	827.5	804.298	0.321719
0.6872	824	804.89	0.321956
0.68724	802.6	805.477	0.322191
0.68728	811	806.06	0.322424
0.68732	785.2	806.637	0.322655
0.68736	761.4	807.21	0.322884
0.6874	754.6	807.778	0.323111
0.68744	757.4	808.341	0.323337
0.68748	765.2	808.9	0.32356
0.68752	746.1	809.453	0.323781
0.68756	740.4	810.002	0.324001
0.6876	775.6	810.545	0.324218
0.68764	743.6	811.083	0.324433
0.68768	776.9	811.615	0.324646
0.68772	784	812.141	0.324857
0.68776	798	812.662	0.325065
0.6878	827.4	813.177	0.325271
0.68784	829	813.685	0.325474
0.68788	845.2	814.187	0.325675
0.68792	858.8	814.682	0.325873
0.68796	872.5	815.17	0.326068
0.688	850.5	815.651	0.32626
0.68804	875.6	816.124	0.32645
0.68808	858.9	816.591	0.326636
0.68812	848.5	817.049	0.32682
0.68816	849.8	817.5	0.327
0.6882	819.5	817.944	0.327177
0.68824	798.8	818.379	0.327352
0.68828	786.8	818.807	0.327523
0.68832	795	819.226	0.327691
0.68836	768.6	819.638	0.327855
0.6884	791.8	820.041	0.328016
0.68844	780	820.436	0.328174
0.68848	798.7	820.823	0.328329
0.68852	781.8	821.201	0.32848
0.68856	803.6	821.57	0.328628
0.6886	799.9	821.93	0.328772
0.68864	815.4	822.281	0.328912
0.68868	834.9	822.623	0.329049
0.68872	829.5	822.955	0.329182
0.68876	848.3	823.277	0.329311
0.6888	849	823.59	0.329436
0.68884	843	823.892	0.329557
0.68888	844	824.184	0.329674
0.68892	837.8	824.466	0.329786
0.68896	844	824.737	0.329895
0.689	823.6	824.997	0.329999
0.68904	823.5	825.247	0.330099
0.68908	803.8	825.485	0.330194
0.68912	798.5	825.713	0.330285
0.68916	802.4	825.929	0.330371
0.6892	796.7	826.133	0.330453
0.68924	791.3	826.326	0.33053
0.68928	810	826.507	0.330603
0.68932	831.1	826.676	0.33067
0.68936	824.3	826.833	0.330733
0.6894	835.2	826.977	0.330791
0.68944	850.1	827.109	0.330843
0.68948	851.7	827.227	0.330891
0.68952	877.1	827.333	0.330933
0.68956	883.9	827.426	0.33097
0.6896	875.6	827.505	0.331002
0.68964	877.5	827.57	0.331028
0.68968	863.8	827.622	0.331049
0.68972	856.5	827.661	0.331064
0.68976	843.2	827.685	0.331074
0.6898	835.8	827.696	0.331078
0.68984	811.5	827.692	0.331077
0.68988	819.2	827.675	0.33107
0.68992	797.4	827.643	0.331057
0.68996	793.6	827.597	0.331039
0.69	761.7	827.537	0.331015
0.69004	770	827.463	0.330985
0.69008	783.9	827.374	0.330949
0.69012	771	827.27	0.330908
0.69016	758.5	827.152	0.330861
0.6902	803.4	827.018	0.330807
0.69024	821	826.869	0.330748
0.69028	837.3	826.705	0.330682
0.69032	856.1	826.525	0.33061
0.69036	883.4	826.33	0.330532
0.6904	912.3	826.118	0.330447
0.69044	941.9	825.89	0.330356
0.69048	942	825.645	0.330258
0.69052	956.2	825.384	0.330154
0.69056	938.4	825.106	0.330042
0.6906	945.7	824.812	0.329925
0.69064	937.9	824.501	0.3298
0.69068	928.3	824.173	0.329669
0.69072	906.8	823.83	0.329532
0.69076	891.8	823.47	0.329388
0.6908	875.6	823.094	0.329237
0.69084	854.7	822.702	0.329081
0.69088	856.2	822.294	0.328918
0.69092	851.2	821.872	0.328749
0.69096	817.6	821.434	0.328574
0.691	826	820.982	0.328393
0.69104	810.6	820.515	0.328206
0.69108	817.1	820.034	0.328014
0.69112	803.5	819.539	0.327816
0.69116	817.2	819.031	0.327612
0.6912	817.4	818.509	0.327404
0.69124	803	817.974	0.32719
0.69128	823	817.427	0.326971
0.69132	839.9	816.867	0.326747
