# Supplementary material for: Shear Thickening Fluids in Cork Agglomerates: An Exploration of Advantages and Drawbacks
Source: Preprints.org preprint supplement (doi:10.20944/preprints202304.0004.v1), 2023-04-03
Supplement: Supplementary file 14 [file CG_y_30.xlsx]

## Sheet: data
Time - Force (Bridge) - Force	Amplitude - Force (Bridge) - Force	data
0	31.59	-31.59		-1
4e-05	37.63	-37.63
8e-05	37.92	-37.92
0.00012	20.99	-20.99
0.00016	55.81	-55.81
0.0002	14.4	-14.4
0.00024	21.57	-21.57
0.00028	34.48	-34.48
0.00032	33.13	-33.13
0.00036	31.33	-31.33
0.0004	44.14	-44.14
0.00044	36.59	-36.59
0.00048	24.25	-24.25
0.00052	26.1	-26.1
0.00056	28.01	-28.01
0.0006	12.63	-12.63
0.00064	23.47	-23.47
0.00068	21.83	-21.83
0.00072	25.7	-25.7
0.00076	36.62	-36.62
0.0008	15.55	-15.55
0.00084	13.79	-13.79
0.00088	23.18	-23.18
0.00092	18.27	-18.27
0.00096	25.41	-25.41
0.001	30.21	-30.21
0.00104	35.7	-35.7
0.00108	22.63	-22.63
0.00112	23.1	-23.1
0.00116	15.18	-15.18
0.0012	29.11	-29.11
0.00124	22.89	-22.89
0.00128	17.55	-17.55
0.00132	24.98	-24.98
0.00136	36.74	-36.74
0.0014	23.68	-23.68
0.00144	19.92	-19.92
0.00148	6.855	-6.855
0.00152	19.37	-19.37
0.00156	23.7	-23.7
0.0016	28.7	-28.7
0.00164	38.1	-38.1
0.00168	23.13	-23.13
0.00172	21.39	-21.39
0.00176	31.39	-31.39
0.0018	4.918	-4.918
0.00184	25.12	-25.12
0.00188	21.83	-21.83
0.00192	42.29	-42.29
0.00196	17.92	-17.92
0.002	20.81	-20.81
0.00204	12.03	-12.03
0.00208	12.35	-12.35
0.00212	18.3	-18.3
0.00216	17.58	-17.58
0.0022	12.11	-12.11
0.00224	21.1	-21.1
0.00228	30.73	-30.73
0.00232	22.06	-22.06
0.00236	10.55	-10.55
0.0024	28.82	-28.82
0.00244	23.1	-23.1
0.00248	27.17	-27.17
0.00252	11.62	-11.62
0.00256	17.32	-17.32
0.0026	35.67	-35.67
0.00264	24.43	-24.43
0.00268	16.54	-16.54
0.00272	19.86	-19.86
0.00276	27.92	-27.92
0.0028	6.248	-6.248
0.00284	16.31	-16.31
0.00288	13.47	-13.47
0.00292	29.05	-29.05
0.00296	20.93	-20.93
0.003	22.66	-22.66
0.00304	22.69	-22.69
0.00308	5.092	-5.092
0.00312	30.64	-30.64
0.00316	32.37	-32.37
0.0032	7.375	-7.375
0.00324	25.12	-25.12
0.00328	12.06	-12.06
0.00332	30.12	-30.12
0.00336	31.04	-31.04
0.0034	27.23	-27.23
0.00344	4.832	-4.832
0.00348	23.1	-23.1
0.00352	31.74	-31.74
0.00356	16.94	-16.94
0.0036	21.71	-21.71
0.00364	23.99	-23.99
0.00368	25.52	-25.52
0.00372	2.317	-2.317
0.00376	10.32	-10.32
0.0038	27.63	-27.63
0.00384	11.51	-11.51
0.00388	22.46	-22.46
0.00392	40.47	-40.47
0.00396	22.84	-22.84
0.004	10.47	-10.47
0.00404	23.42	-23.42
0.00408	20.26	-20.26
0.00412	21.83	-21.83
0.00416	39.05	-39.05
0.0042	36.74	-36.74
0.00424	41.54	-41.54
0.00428	28.33	-28.33
0.00432	19.43	-19.43
0.00436	21.51	-21.51
0.0044	32.52	-32.52
0.00444	20	-20
0.00448	21.33	-21.33
0.00452	48.33	-48.33
0.00456	28.7	-28.7
0.0046	8.82	-8.82
0.00464	30.55	-30.55
0.00468	3.126	-3.126
0.00472	-3.463	3.463
0.00476	20	-20
0.0048	28.53	-28.53
0.00484	9.34	-9.34
0.00488	-13.12	13.12
0.00492	-44.71	44.71
0.00496	36.04	-36.04
0.005	47.63	-47.63
0.00504	7.144	-7.144
0.00508	-43.75	43.75
0.00512	-10.89	10.89
0.00516	12.98	-12.98
0.0052	-41.27	41.27
0.00524	4.138	-4.138
0.00528	14.11	-14.11
0.00532	11.1	-11.1
0.00536	-25.11	25.11
0.0054	-45.95	45.95
0.00544	-3.434	3.434
0.00548	8.04	-8.04
0.00552	-13.32	13.32
0.00556	18.79	-18.79
0.0056	24.92	-24.92
0.00564	23.5	-23.5
0.00568	6.19	-6.19
0.00572	11.33	-11.33
0.00576	14.98	-14.98
0.0058	-3.665	3.665
0.00584	28.82	-28.82
0.00588	13.24	-13.24
0.00592	16.02	-16.02
0.00596	17.2	-17.2
0.006	21.25	-21.25
0.00604	10.58	-10.58
0.00608	-4.301	4.301
0.00612	3.56	-3.56
0.00616	-6.209	6.209
0.0062	5.438	-5.438
0.00624	9.369	-9.369
0.00628	30.41	-30.41
0.00632	15.52	-15.52
0.00636	6.363	-6.363
0.0064	-14.39	14.39
0.00644	18.62	-18.62
0.00648	14.8	-14.8
0.00652	7.635	-7.635
0.00656	15.29	-15.29
0.0066	13.94	-13.94
0.00664	8.04	-8.04
0.00668	21.94	-21.94
0.00672	13.16	-13.16
0.00676	22.03	-22.03
0.0068	6.277	-6.277
0.00684	-370.6m	0.3706
0.00688	13.76	-13.76
0.00692	26.51	-26.51
0.00696	51.39	-51.39
0.007	9.456	-9.456
0.00704	496.4m	-0.4964
0.00708	33.97m	-0.03397
0.00712	41.74	-41.74
0.00716	13.1	-13.1
0.0072	24.63	-24.63
0.00724	33.21	-33.21
0.00728	15.24	-15.24
0.00732	-13.52	13.52
0.00736	-19.36	19.36
0.0074	36.19	-36.19
0.00744	15.12	-15.12
0.00748	36.51	-36.51
0.00752	12.89	-12.89
0.00756	26.13	-26.13
0.0076	31.22	-31.22
0.00764	19.83	-19.83
0.00768	27.11	-27.11
0.00772	15	-15
0.00776	23.59	-23.59
0.0078	40.41	-40.41
0.00784	20.09	-20.09
0.00788	16.07	-16.07
0.00792	10.35	-10.35
0.00796	51.42	-51.42
0.008	52.14	-52.14
0.00804	18.62	-18.62
0.00808	36.36	-36.36
0.00812	-7.451	7.451
0.00816	18.85	-18.85
0.0082	14.8	-14.8
0.00824	40.24	-40.24
0.00828	19.72	-19.72
0.00832	16.59	-16.59
0.00836	32.55	-32.55
0.0084	-2.856	2.856
0.00844	19.63	-19.63
0.00848	6.248	-6.248
0.00852	12.84	-12.84
0.00856	11.94	-11.94
0.0086	44.57	-44.57
0.00864	25	-25
0.00868	43.33	-43.33
0.00872	49.77	-49.77
0.00876	13.85	-13.85
0.0088	28.36	-28.36
0.00884	13.47	-13.47
0.00888	12.11	-12.11
0.00892	38.15	-38.15
0.00896	36.97	-36.97
0.009	24.17	-24.17
0.00904	33.62	-33.62
0.00908	45.32	-45.32
0.00912	40.21	-40.21
0.00916	17.43	-17.43
0.0092	32.55	-32.55
0.00924	25.44	-25.44
0.00928	40.18	-40.18
0.00932	25.7	-25.7
0.00936	21.91	-21.91
0.0094	40.5	-40.5
0.00944	55.26	-55.26
0.00948	30.09	-30.09
0.00952	17.06	-17.06
0.00956	24.66	-24.66
0.0096	17.87	-17.87
0.00964	38.99	-38.99
0.00968	20.12	-20.12
0.00972	32.26	-32.26
0.00976	33.7	-33.7
0.0098	18.04	-18.04
0.00984	38.24	-38.24
0.00988	28.82	-28.82
0.00992	32.29	-32.29
0.00996	28.88	-28.88
0.01	22.52	-22.52
0.01004	31.8	-31.8
0.01008	20.38	-20.38
0.01012	32.17	-32.17
0.01016	33.21	-33.21
0.0102	36.48	-36.48
0.01024	31.48	-31.48
0.01028	29.66	-29.66
0.01032	10.06	-10.06
0.01036	41.62	-41.62
0.0104	58.7	-58.7
0.01044	25.18	-25.18
0.01048	44.66	-44.66
0.01052	23.82	-23.82
0.01056	44.8	-44.8
0.0106	30.15	-30.15
0.01064	30.99	-30.99
0.01068	28.94	-28.94
0.01072	34.69	-34.69
0.01076	40.32	-40.32
0.0108	26.13	-26.13
0.01084	20.78	-20.78
0.01088	47.32	-47.32
0.01092	21.57	-21.57
0.01096	50.55	-50.55
0.011	26.51	-26.51
0.01104	32.14	-32.14
0.01108	34.98	-34.98
0.01112	14.46	-14.46
0.01116	39.31	-39.31
0.0112	25.58	-25.58
0.01124	40.29	-40.29
0.01128	42.35	-42.35
0.01132	41.22	-41.22
0.01136	33.96	-33.96
0.0114	35.76	-35.76
0.01144	37.35	-37.35
0.01148	41.22	-41.22
0.01152	54.89	-54.89
0.01156	10.12	-10.12
0.0116	35.7	-35.7
0.01164	58.65	-58.65
0.01168	36.74	-36.74
0.01172	26.97	-26.97
0.01176	30.12	-30.12
0.0118	27.23	-27.23
0.01184	30.73	-30.73
0.01188	23.27	-23.27
0.01192	34.8	-34.8
0.01196	29.43	-29.43
0.012	40.61	-40.61
0.01204	36.77	-36.77
0.01208	28.33	-28.33
0.01212	25.06	-25.06
0.01216	30.93	-30.93
0.0122	37.98	-37.98
0.01224	55.84	-55.84
0.01228	28.04	-28.04
0.01232	32.37	-32.37
0.01236	30.12	-30.12
0.0124	34.57	-34.57
0.01244	47.52	-47.52
0.01248	16.54	-16.54
0.01252	38.41	-38.41
0.01256	31.04	-31.04
0.0126	27.43	-27.43
0.01264	31.22	-31.22
0.01268	55.81	-55.81
0.01272	41.36	-41.36
0.01276	28.65	-28.65
0.0128	26.77	-26.77
0.01284	32.06	-32.06
0.01288	34.22	-34.22
0.01292	39.8	-39.8
0.01296	9.658	-9.658
0.013	28.94	-28.94
0.01304	22.61	-22.61
0.01308	22.81	-22.81
0.01312	31.54	-31.54
0.01316	27.78	-27.78
0.0132	12.2	-12.2
0.01324	25.18	-25.18
0.01328	29.57	-29.57
0.01332	22.58	-22.58
0.01336	46.77	-46.77
0.0134	38.21	-38.21
0.01344	31.22	-31.22
0.01348	28.01	-28.01
0.01352	45.61	-45.61
0.01356	25.7	-25.7
0.0136	29.25	-29.25
0.01364	28.18	-28.18
0.01368	37.2	-37.2
0.01372	35.32	-35.32
0.01376	41.36	-41.36
0.0138	32.17	-32.17
0.01384	31.16	-31.16
0.01388	31.13	-31.13
0.01392	32.63	-32.63
0.01396	38.44	-38.44
0.014	24.25	-24.25
0.01404	30.93	-30.93
0.01408	43.91	-43.91
0.01412	24.74	-24.74
0.01416	36.02	-36.02
0.0142	25.38	-25.38
0.01424	26.54	-26.54
0.01428	48.65	-48.65
0.01432	36.13	-36.13
0.01436	28.53	-28.53
0.0144	22.11	-22.11
0.01444	50.73	-50.73
0.01448	23.18	-23.18
0.01452	54.11	-54.11
0.01456	32.11	-32.11
0.0146	36.22	-36.22
0.01464	27.49	-27.49
0.01468	40.96	-40.96
0.01472	102.5	-102.5
0.01476	68.36	-68.36
0.0148	37.11	-37.11
0.01484	60.18	-60.18
0.01488	98.82	-98.82
0.01492	81.1	-81.1
0.01496	37.11	-37.11
0.015	49.48	-49.48
0.01504	79.97	-79.97
0.01508	58.53	-58.53
0.01512	50.35	-50.35
0.01516	60.47	-60.47
0.0152	83.5	-83.5
0.01524	78.62	-78.62
0.01528	67.06	-67.06
0.01532	90.41	-90.41
0.01536	53.91	-53.91
0.0154	47.84	-47.84
0.01544	93.24	-93.24
0.01548	83.59	-83.59
0.01552	43.53	-43.53
0.01556	49.05	-49.05
0.0156	84.45	-84.45
0.01564	82.92	-82.92
0.01568	83.01	-83.01
0.01572	42.87	-42.87
0.01576	73.93	-73.93
0.0158	64.74	-64.74
0.01584	52.06	-52.06
0.01588	79.95	-79.95
0.01592	67.2	-67.2
0.01596	103.5	-103.5
0.016	38.33	-38.33
0.01604	72.29	-72.29
0.01608	65.87	-65.87
0.01612	50.67	-50.67
0.01616	46.33	-46.33
0.0162	54.71	-54.71
0.01624	90.18	-90.18
0.01628	78.01	-78.01
0.01632	75.93	-75.93
0.01636	46.36	-46.36
0.0164	45	-45
0.01644	47.49	-47.49
0.01648	82.78	-82.78
0.01652	85.29	-85.29
0.01656	63.3	-63.3
0.0166	43.88	-43.88
0.01664	53.41	-53.41
0.01668	46.48	-46.48
0.01672	69.19	-69.19
0.01676	85.61	-85.61
0.0168	74.28	-74.28
0.01684	73.5	-73.5
0.01688	43.53	-43.53
0.01692	22.92	-22.92
0.01696	43.65	-43.65
0.017	60.38	-60.38
0.01704	93.07	-93.07
0.01708	75.7	-75.7
0.01712	40.29	-40.29
0.01716	62.2	-62.2
0.0172	23.88	-23.88
0.01724	57.72	-57.72
0.01728	62.69	-62.69
0.01732	64.45	-64.45
0.01736	67.75	-67.75
0.0174	62.14	-62.14
0.01744	64.66	-64.66
0.01748	67.89	-67.89
0.01752	52.11	-52.11
0.01756	60.7	-60.7
0.0176	67.23	-67.23
0.01764	70.52	-70.52
0.01768	51.33	-51.33
0.01772	53.39	-53.39
0.01776	61.1	-61.1
0.0178	61.33	-61.33
0.01784	53.7	-53.7
0.01788	60.84	-60.84
0.01792	47.06	-47.06
0.01796	27.35	-27.35
0.018	44.95	-44.95
0.01804	44.54	-44.54
0.01808	60.99	-60.99
0.01812	64.02	-64.02
0.01816	50.44	-50.44
0.0182	49.05	-49.05
0.01824	28.27	-28.27
0.01828	57.49	-57.49
0.01832	50.87	-50.87
0.01836	59.89	-59.89
0.0184	61.02	-61.02
0.01844	45.93	-45.93
0.01848	22.52	-22.52
0.01852	37	-37
0.01856	52.4	-52.4
0.0186	49.31	-49.31
0.01864	67.37	-67.37
0.01868	43.88	-43.88
0.01872	41.13	-41.13
0.01876	39.2	-39.2
0.0188	29.54	-29.54
0.01884	33.07	-33.07
0.01888	17.26	-17.26
0.01892	42.61	-42.61
0.01896	43.21	-43.21
0.019	39.05	-39.05
0.01904	33.36	-33.36
0.01908	32.63	-32.63
0.01912	45.15	-45.15
0.01916	31.85	-31.85
0.0192	41.71	-41.71
0.01924	61.97	-61.97
0.01928	42.35	-42.35
0.01932	27.09	-27.09
0.01936	23.47	-23.47
0.0194	18.96	-18.96
0.01944	38.65	-38.65
0.01948	32.84	-32.84
0.01952	36.65	-36.65
0.01956	24.83	-24.83
0.0196	45.29	-45.29
0.01964	46.8	-46.8
0.01968	29.66	-29.66
0.01972	20.32	-20.32
0.01976	26.74	-26.74
0.0198	27.55	-27.55
0.01984	52.87	-52.87
0.01988	30.41	-30.41
0.01992	24.31	-24.31
0.01996	28.76	-28.76
0.02	32.52	-32.52
0.02004	41.45	-41.45
0.02008	44.05	-44.05
0.02012	25.29	-25.29
0.02016	20.18	-20.18
0.0202	32.23	-32.23
0.02024	44.25	-44.25
0.02028	26.74	-26.74
0.02032	11.77	-11.77
0.02036	20.78	-20.78
0.0204	32.63	-32.63
0.02044	28.94	-28.94
0.02048	43.56	-43.56
0.02052	32.61	-32.61
0.02056	25.06	-25.06
0.0206	19.22	-19.22
0.02064	32.35	-32.35
0.02068	41.71	-41.71
0.02072	29.31	-29.31
0.02076	24.86	-24.86
0.0208	27.52	-27.52
0.02084	16.48	-16.48
0.02088	22.61	-22.61
0.02092	27.78	-27.78
0.02096	24.28	-24.28
0.021	23.79	-23.79
0.02104	26.13	-26.13
0.02108	28.41	-28.41
0.02112	15.73	-15.73
0.02116	30.96	-30.96
0.0212	9.745	-9.745
0.02124	10.5	-10.5
0.02128	39.86	-39.86
0.02132	30.03	-30.03
0.02136	26.33	-26.33
0.0214	13.62	-13.62
0.02144	11.51	-11.51
0.02148	17.09	-17.09
0.02152	-8.81	8.81
0.02156	29.48	-29.48
0.0216	27.69	-27.69
0.02164	32.75	-32.75
0.02168	36.04	-36.04
0.02172	25.24	-25.24
0.02176	-659.7m	0.6597
0.0218	21.88	-21.88
0.02184	18.24	-18.24
0.02188	30.9	-30.9
0.02192	31.28	-31.28
0.02196	17.89	-17.89
0.022	33.1	-33.1
0.02204	20.52	-20.52
0.02208	33.59	-33.59
0.02212	6.45	-6.45
0.02216	40.03	-40.03
0.0222	25.12	-25.12
0.02224	34.74	-34.74
0.02228	29.51	-29.51
0.02232	18.91	-18.91
0.02236	14.14	-14.14
0.0224	29.46	-29.46
0.02244	21.77	-21.77
0.02248	27.26	-27.26
0.02252	18.01	-18.01
0.02256	10.73	-10.73
0.0226	19.02	-19.02
0.02264	24.43	-24.43
0.02268	25.58	-25.58
0.02272	32.89	-32.89
0.02276	30.44	-30.44
0.0228	20.5	-20.5
0.02284	19.37	-19.37
0.02288	22.32	-22.32
0.02292	21.16	-21.16
0.02296	32.61	-32.61
0.023	30.84	-30.84
0.02304	29.34	-29.34
0.02308	25.87	-25.87
0.02312	20.18	-20.18
0.02316	36.16	-36.16
0.0232	24.69	-24.69
0.02324	23.42	-23.42
0.02328	26.91	-26.91
0.02332	27.63	-27.63
0.02336	21.07	-21.07
0.0234	37.84	-37.84
0.02344	20.76	-20.76
0.02348	36.62	-36.62
0.02352	22.03	-22.03
0.02356	8.3	-8.3
0.0236	25.73	-25.73
0.02364	37.69	-37.69
0.02368	27.98	-27.98
0.02372	24.54	-24.54
0.02376	15.21	-15.21
0.0238	19.43	-19.43
0.02384	14.89	-14.89
0.02388	27.98	-27.98
0.02392	26.07	-26.07
0.02396	20.41	-20.41
0.024	27.89	-27.89
0.02404	33.39	-33.39
0.02408	31.91	-31.91
0.02412	25	-25
0.02416	27.92	-27.92
0.0242	24.83	-24.83
0.02424	22.52	-22.52
0.02428	41.88	-41.88
0.02432	15.09	-15.09
0.02436	22.17	-22.17
0.0244	27.98	-27.98
0.02444	29.6	-29.6
0.02448	18.07	-18.07
0.02452	19.66	-19.66
0.02456	26.57	-26.57
0.0246	32.72	-32.72
0.02464	16.02	-16.02
0.02468	14.83	-14.83
0.02472	-10.17	10.17
0.02476	21.39	-21.39
0.0248	17.49	-17.49
0.02484	12.61	-12.61
0.02488	-3.174	3.174
0.02492	-3.983	3.983
0.02496	3.473	-3.473
0.025	-7.249	7.249
0.02504	-28.69	28.69
0.02508	13.91	-13.91
0.02512	8.502	-8.502
0.02516	-3.434	3.434
0.0252	-27.8	27.8
0.02524	-36.27	36.27
0.02528	12.87	-12.87
0.02532	-9.764	9.764
0.02536	-4.735	4.735
0.0254	-4.821	4.821
0.02544	-6.18	6.18
0.02548	-16.99	16.99
0.02552	27.29	-27.29
0.02556	22.87	-22.87
0.0256	18.94	-18.94
0.02564	-8.029	8.029
0.02568	7.259	-7.259
0.02572	-2.509	2.509
0.02576	22.2	-22.2
0.0258	27.49	-27.49
0.02584	3.415	-3.415
0.02588	-26.61	26.61
0.02592	1.45	-1.45
0.02596	18.99	-18.99
0.026	10.47	-10.47
0.02604	11.05	-11.05
0.02608	-6.324	6.324
0.02612	-6.238	6.238
0.02616	17.23	-17.23
0.0262	28.21	-28.21
0.02624	18.15	-18.15
0.02628	24.17	-24.17
0.02632	7.404	-7.404
0.02636	1.826	-1.826
0.0264	8.531	-8.531
0.02644	-890.9m	0.8909
0.02648	2.491	-2.491
0.02652	4.138	-4.138
0.02656	3.011	-3.011
0.0266	25.52	-25.52
0.02664	36.85	-36.85
0.02668	19.43	-19.43
0.02672	23.91	-23.91
0.02676	-14.88	14.88
0.0268	30.15	-30.15
0.02684	23.99	-23.99
0.02688	30.58	-30.58
0.02692	554.2m	-0.5542
0.02696	2.375	-2.375
0.027	14.6	-14.6
0.02704	24.89	-24.89
0.02708	36.04	-36.04
0.02712	6.855	-6.855
0.02716	12.11	-12.11
0.0272	-4.07	4.07
0.02724	14.66	-14.66
0.02728	43.56	-43.56
0.02732	-8.781	8.781
0.02736	16.1	-16.1
0.0274	4.947	-4.947
0.02744	6.045	-6.045
0.02748	15.47	-15.47
0.02752	14.8	-14.8
0.02756	52.46	-52.46
0.0276	32.89	-32.89
0.02764	2.895	-2.895
0.02768	9.051	-9.051
0.02772	13.47	-13.47
0.02776	25.67	-25.67
0.0278	11.22	-11.22
0.02784	19.31	-19.31
0.02788	9.253	-9.253
0.02792	9.225	-9.225
0.02796	21.36	-21.36
0.028	19.57	-19.57
0.02804	15.7	-15.7
0.02808	17.75	-17.75
0.02812	37.14	-37.14
0.02816	36.71	-36.71
0.0282	28.41	-28.41
0.02824	11.85	-11.85
0.02828	22.35	-22.35
0.02832	18.33	-18.33
0.02836	6.884	-6.884
0.0284	13.39	-13.39
0.02844	28.36	-28.36
0.02848	25.99	-25.99
0.02852	9.514	-9.514
0.02856	16.28	-16.28
0.0286	7.693	-7.693
0.02864	43.13	-43.13
0.02868	13.88	-13.88
0.02872	35.06	-35.06
0.02876	28.7	-28.7
0.0288	20	-20
0.02884	25.47	-25.47
0.02888	20.38	-20.38
0.02892	17.87	-17.87
0.02896	22.35	-22.35
0.029	27.46	-27.46
0.02904	33.76	-33.76
0.02908	25.24	-25.24
0.02912	17.72	-17.72
0.02916	47.37	-47.37
0.0292	15.41	-15.41
0.02924	44.25	-44.25
0.02928	35.84	-35.84
0.02932	42.11	-42.11
0.02936	46.48	-46.48
0.0294	48.36	-48.36
0.02944	55.96	-55.96
0.02948	26.22	-26.22
0.02952	28.24	-28.24
0.02956	45.44	-45.44
0.0296	28.04	-28.04
0.02964	33.53	-33.53
0.02968	8.473	-8.473
0.02972	30.7	-30.7
0.02976	40.55	-40.55
0.0298	39.46	-39.46
0.02984	20.9	-20.9
0.02988	28.94	-28.94
0.02992	51.25	-51.25
0.02996	15.76	-15.76
0.03	49.37	-49.37
0.03004	22.72	-22.72
0.03008	32.63	-32.63
0.03012	38.76	-38.76
0.03016	59.6	-59.6
0.0302	31.16	-31.16
0.03024	38.39	-38.39
0.03028	12.03	-12.03
0.03032	18.15	-18.15
0.03036	34.83	-34.83
0.0304	31.91	-31.91
0.03044	25.9	-25.9
0.03048	28.68	-28.68
0.03052	24.83	-24.83
0.03056	34.46	-34.46
0.0306	48.96	-48.96
0.03064	19.34	-19.34
0.03068	47.63	-47.63
0.03072	27.35	-27.35
0.03076	26.71	-26.71
0.0308	34.66	-34.66
0.03084	29.86	-29.86
0.03088	52.46	-52.46
0.03092	33.88	-33.88
0.03096	56.07	-56.07
0.031	32.37	-32.37
0.03104	19.46	-19.46
0.03108	32.95	-32.95
0.03112	36.91	-36.91
0.03116	36.77	-36.77
0.0312	44.28	-44.28
0.03124	39.98	-39.98
0.03128	30.61	-30.61
0.03132	46.85	-46.85
0.03136	29.98	-29.98
0.0314	45.64	-45.64
0.03144	37.26	-37.26
0.03148	48.18	-48.18
0.03152	35.7	-35.7
0.03156	30.84	-30.84
0.0316	36.51	-36.51
0.03164	46.68	-46.68
0.03168	30.5	-30.5
0.03172	37.35	-37.35
0.03176	30.7	-30.7
0.0318	35.67	-35.67
0.03184	30.15	-30.15
0.03188	45.38	-45.38
0.03192	27.61	-27.61
0.03196	27.14	-27.14
0.032	46.85	-46.85
0.03204	37.87	-37.87
0.03208	30.61	-30.61
0.03212	42	-42
0.03216	29.48	-29.48
0.0322	29.63	-29.63
0.03224	12.75	-12.75
0.03228	32.55	-32.55
0.03232	32.78	-32.78
0.03236	28.94	-28.94
0.0324	41.3	-41.3
0.03244	24.54	-24.54
0.03248	31.77	-31.77
0.03252	55.03	-55.03
0.03256	27.75	-27.75
0.0326	34.17	-34.17
0.03264	37.87	-37.87
0.03268	31.39	-31.39
0.03272	46.82	-46.82
0.03276	38.21	-38.21
0.0328	52.66	-52.66
0.03284	31.22	-31.22
0.03288	34.43	-34.43
0.03292	30.73	-30.73
0.03296	28.91	-28.91
0.033	46.88	-46.88
0.03304	25.76	-25.76
0.03308	34.02	-34.02
0.03312	22.52	-22.52
0.03316	28.59	-28.59
0.0332	24.08	-24.08
0.03324	23.42	-23.42
0.03328	40.99	-40.99
0.03332	37.26	-37.26
0.03336	33.99	-33.99
0.0334	41.59	-41.59
0.03344	36.57	-36.57
0.03348	27.84	-27.84
0.03352	36.51	-36.51
0.03356	49.74	-49.74
0.0336	39.34	-39.34
0.03364	32.29	-32.29
0.03368	37.43	-37.43
0.03372	47.35	-47.35
0.03376	36.83	-36.83
0.0338	39.83	-39.83
0.03384	25.58	-25.58
0.03388	30.96	-30.96
0.03392	15.7	-15.7
0.03396	34.92	-34.92
0.034	38.56	-38.56
0.03404	29.25	-29.25
0.03408	23.5	-23.5
0.03412	24.31	-24.31
0.03416	45.5	-45.5
0.0342	32.32	-32.32
0.03424	33.73	-33.73
0.03428	41.51	-41.51
0.03432	45.52	-45.52
0.03436	47.09	-47.09
0.0344	36.07	-36.07
0.03444	37.17	-37.17
0.03448	31.42	-31.42
0.03452	42.98	-42.98
0.03456	28.59	-28.59
0.0346	40.21	-40.21
0.03464	42.43	-42.43
0.03468	24.14	-24.14
0.03472	72.89	-72.89
0.03476	68.36	-68.36
0.0348	40.03	-40.03
0.03484	55.76	-55.76
0.03488	116.1	-116.1
0.03492	117	-117
0.03496	47.55	-47.55
0.035	55.18	-55.18
0.03504	25.03	-25.03
0.03508	95.81	-95.81
0.03512	82.72	-82.72
0.03516	55.29	-55.29
0.0352	96.19	-96.19
0.03524	56.19	-56.19
0.03528	53.59	-53.59
0.03532	53.93	-53.93
0.03536	95.38	-95.38
0.0354	83.12	-83.12
0.03544	66.28	-66.28
0.03548	82.92	-82.92
0.03552	96.91	-96.91
0.03556	60.58	-60.58
0.0356	33.62	-33.62
0.03564	84.43	-84.43
0.03568	95.47	-95.47
0.03572	67.49	-67.49
0.03576	42.98	-42.98
0.0358	78.67	-78.67
0.03584	55.06	-55.06
0.03588	81.04	-81.04
0.03592	61.8	-61.8
0.03596	7.664	-7.664
0.036	64.11	-64.11
0.03604	61.33	-61.33
0.03608	31.54	-31.54
0.03612	49.69	-49.69
0.03616	91.1	-91.1
0.0362	66.74	-66.74
0.03624	90.9	-90.9
0.03628	55.67	-55.67
0.03632	36.65	-36.65
0.03636	76.1	-76.1
0.0364	51.97	-51.97
0.03644	67.37	-67.37
0.03648	45.67	-45.67
0.03652	38.39	-38.39
0.03656	83.44	-83.44
0.0366	76.71	-76.71
0.03664	87.69	-87.69
0.03668	53.67	-53.67
0.03672	29.05	-29.05
0.03676	56.77	-56.77
0.0368	65.26	-65.26
0.03684	61.54	-61.54
0.03688	66.42	-66.42
0.03692	81.88	-81.88
0.03696	55.21	-55.21
0.037	62.11	-62.11
0.03704	76.13	-76.13
0.03708	66.39	-66.39
0.03712	57.55	-57.55
0.03716	70.49	-70.49
0.0372	57.63	-57.63
0.03724	83.01	-83.01
0.03728	60.15	-60.15
0.03732	36.62	-36.62
0.03736	55.44	-55.44
0.0374	68.44	-68.44
0.03744	79.63	-79.63
0.03748	80	-80
0.03752	60.21	-60.21
0.03756	83.47	-83.47
0.0376	53.1	-53.1
0.03764	39.74	-39.74
0.03768	37.2	-37.2
0.03772	27.92	-27.92
0.03776	78.41	-78.41
0.0378	51.3	-51.3
0.03784	57.34	-57.34
0.03788	52.89	-52.89
0.03792	60.5	-60.5
0.03796	53.07	-53.07
0.038	54.95	-54.95
0.03804	18.44	-18.44
0.03808	25.76	-25.76
0.03812	49.72	-49.72
0.03816	45.87	-45.87
0.0382	57.32	-57.32
0.03824	50	-50
0.03828	66.22	-66.22
0.03832	46.68	-46.68
0.03836	50.03	-50.03
0.0384	34.14	-34.14
0.03844	38.76	-38.76
0.03848	40.47	-40.47
0.03852	35.99	-35.99
0.03856	48.91	-48.91
0.0386	55.38	-55.38
0.03864	36.65	-36.65
0.03868	44.22	-44.22
0.03872	38.65	-38.65
0.03876	38.99	-38.99
0.0388	40.47	-40.47
0.03884	64.97	-64.97
0.03888	21.51	-21.51
0.03892	33.99	-33.99
0.03896	26.97	-26.97
0.039	34.08	-34.08
0.03904	24.37	-24.37
0.03908	49.34	-49.34
0.03912	38.21	-38.21
0.03916	36.8	-36.8
0.0392	40.84	-40.84
0.03924	20	-20
0.03928	36.54	-36.54
0.03932	47.23	-47.23
0.03936	25.7	-25.7
0.0394	17.98	-17.98
0.03944	44.92	-44.92
0.03948	17.32	-17.32
0.03952	29.4	-29.4
0.03956	24.22	-24.22
0.0396	29.17	-29.17
0.03964	22.55	-22.55
0.03968	26.65	-26.65
0.03972	17.4	-17.4
0.03976	45.32	-45.32
0.0398	44.43	-44.43
0.03984	27.78	-27.78
0.03988	38.07	-38.07
0.03992	24.48	-24.48
0.03996	48.21	-48.21
0.04	24.17	-24.17
0.04004	42.43	-42.43
0.04008	19.37	-19.37
0.04012	64.69	-64.69
0.04016	35.52	-35.52
0.0402	29.46	-29.46
0.04024	37.49	-37.49
0.04028	32.72	-32.72
0.04032	22.84	-22.84
0.04036	45.21	-45.21
0.0404	18.27	-18.27
0.04044	10.64	-10.64
0.04048	31.39	-31.39
0.04052	14.37	-14.37
0.04056	23.99	-23.99
0.0406	42.46	-42.46
0.04064	21.8	-21.8
0.04068	29.66	-29.66
0.04072	20.73	-20.73
0.04076	30.58	-30.58
0.0408	26.74	-26.74
0.04084	43.56	-43.56
0.04088	45.61	-45.61
0.04092	21.62	-21.62
0.04096	20.67	-20.67
0.041	17.03	-17.03
0.04104	33.15	-33.15
0.04108	15.55	-15.55
0.04112	8.444	-8.444
0.04116	19.51	-19.51
0.0412	35.5	-35.5
0.04124	20.26	-20.26
0.04128	-2.654	2.654
0.04132	43.79	-43.79
0.04136	28.04	-28.04
0.0414	41.19	-41.19
0.04144	12.61	-12.61
0.04148	23.47	-23.47
0.04152	6.652	-6.652
0.04156	20.41	-20.41
0.0416	25.26	-25.26
0.04164	29.92	-29.92
0.04168	53.24	-53.24
0.04172	21.59	-21.59
0.04176	1.739	-1.739
0.0418	19.69	-19.69
0.04184	19.83	-19.83
0.04188	33.94	-33.94
0.04192	27.75	-27.75
0.04196	27.17	-27.17
0.042	20.9	-20.9
0.04204	18.01	-18.01
0.04208	29.92	-29.92
0.04212	1.219	-1.219
0.04216	15	-15
0.0422	9.86	-9.86
0.04224	28.76	-28.76
0.04228	17.52	-17.52
0.04232	727.6m	-0.7276
0.04236	17.55	-17.55
0.0424	9.311	-9.311
0.04244	36.65	-36.65
0.04248	23.18	-23.18
0.04252	16.97	-16.97
0.04256	16.88	-16.88
0.0426	18.24	-18.24
0.04264	31.16	-31.16
0.04268	33.99	-33.99
0.04272	15	-15
0.04276	26.05	-26.05
0.0428	28.36	-28.36
0.04284	36.45	-36.45
0.04288	18.44	-18.44
0.04292	265.2m	-0.2652
0.04296	13.27	-13.27
0.043	13.5	-13.5
0.04304	13.59	-13.59
0.04308	17.43	-17.43
0.04312	24.37	-24.37
0.04316	46.68	-46.68
0.0432	13.33	-13.33
0.04324	16.48	-16.48
0.04328	13.91	-13.91
0.04332	23.21	-23.21
0.04336	8.618	-8.618
0.0434	1.624	-1.624
0.04344	23.7	-23.7
0.04348	17.35	-17.35
0.04352	27.4	-27.4
0.04356	20.06	-20.06
0.0436	16.88	-16.88
0.04364	22.14	-22.14
0.04368	36.74	-36.74
0.04372	26.8	-26.8
0.04376	17.35	-17.35
0.0438	30.73	-30.73
0.04384	18.3	-18.3
0.04388	32.55	-32.55
0.04392	15.61	-15.61
0.04396	20.67	-20.67
0.044	30.61	-30.61
0.04404	1.624	-1.624
0.04408	32.52	-32.52
0.04412	22.32	-22.32
0.04416	18.68	-18.68
0.0442	26.25	-26.25
0.04424	18.99	-18.99
0.04428	13.94	-13.94
0.04432	27.49	-27.49
0.04436	49.11	-49.11
0.0444	13.91	-13.91
0.04444	33.39	-33.39
0.04448	26.85	-26.85
0.04452	29.05	-29.05
0.04456	-2.365	2.365
0.0446	22.49	-22.49
0.04464	22.09	-22.09
0.04468	18.07	-18.07
0.04472	34.92	-34.92
0.04476	9.167	-9.167
0.0448	-3.781	3.781
0.04484	612m	-0.612
0.04488	35.78	-35.78
0.04492	39.8	-39.8
0.04496	669.8m	-0.6698
0.045	-52.54	52.54
0.04504	-45.72	45.72
0.04508	14.95	-14.95
0.04512	50.81	-50.81
0.04516	14.89	-14.89
0.0452	-7.74	7.74
0.04524	-34.71	34.71
0.04528	8.791	-8.791
0.04532	12.61	-12.61
0.04536	-7.134	7.134
0.0454	-23.95	23.95
0.04544	8.618	-8.618
0.04548	16.94	-16.94
0.04552	-1.469	1.469
0.04556	-1.527	1.527
0.0456	1.855	-1.855
0.04564	21.07	-21.07
0.04568	-5.342	5.342
0.04572	20.81	-20.81
0.04576	-19.94	19.94
0.0458	33.24	-33.24
0.04584	16.51	-16.51
0.04588	-8.781	8.781
0.04592	5.005	-5.005
0.04596	9.976	-9.976
0.046	10.87	-10.87
0.04604	3.531	-3.531
0.04608	11.74	-11.74
0.04612	30.7	-30.7
0.04616	2.346	-2.346
0.0462	-6.671	6.671
0.04624	-20.57	20.57
0.04628	1.652	-1.652
0.04632	29.11	-29.11
0.04636	5.67	-5.67
0.0464	9.08	-9.08
0.04644	785.4m	-0.7854
0.04648	22.29	-22.29
0.04652	15.79	-15.79
0.04656	10.12	-10.12
0.0466	10.35	-10.35
0.04664	8.936	-8.936
0.04668	-12.68	12.68
0.04672	9.889	-9.889
0.04676	13.88	-13.88
0.0468	55.44	-55.44
0.04684	14.34	-14.34
0.04688	24.2	-24.2
0.04692	16.16	-16.16
0.04696	8.502	-8.502
0.047	-370.6m	0.3706
0.04704	18.13	-18.13
0.04708	6.306	-6.306
0.04712	22.14	-22.14
0.04716	12.55	-12.55
0.0472	29.57	-29.57
0.04724	11.77	-11.77
0.04728	10.06	-10.06
0.04732	22.2	-22.2
0.04736	-3.087	3.087
0.0474	27	-27
0.04744	3.473	-3.473
0.04748	22.92	-22.92
0.04752	16.22	-16.22
0.04756	21.97	-21.97
0.0476	8.386	-8.386
0.04764	-4.475	4.475
0.04768	4.976	-4.976
0.04772	34.48	-34.48
0.04776	35.81	-35.81
0.0478	22.55	-22.55
0.04784	13.94	-13.94
0.04788	28.47	-28.47
0.04792	43.18	-43.18
0.04796	12.81	-12.81
0.048	33.62	-33.62
0.04804	25.47	-25.47
0.04808	28.41	-28.41
0.04812	12.43	-12.43
0.04816	28.85	-28.85
0.0482	39.43	-39.43
0.04824	34.89	-34.89
0.04828	57	-57
0.04832	14.02	-14.02
0.04836	9.456	-9.456
0.0484	26.22	-26.22
0.04844	12.89	-12.89
0.04848	30.96	-30.96
0.04852	20.26	-20.26
0.04856	10.21	-10.21
0.0486	15.9	-15.9
0.04864	20.64	-20.64
0.04868	16.88	-16.88
0.04872	35.26	-35.26
0.04876	42.35	-42.35
0.0488	26.97	-26.97
0.04884	19.02	-19.02
0.04888	29.72	-29.72
0.04892	29.63	-29.63
0.04896	18.91	-18.91
0.049	39.63	-39.63
0.04904	33.53	-33.53
0.04908	19.02	-19.02
0.04912	37.11	-37.11
0.04916	25.96	-25.96
0.0492	28.53	-28.53
0.04924	27.49	-27.49
0.04928	22.32	-22.32
0.04932	33.62	-33.62
0.04936	50.06	-50.06
0.0494	38.21	-38.21
0.04944	28.56	-28.56
0.04948	25.29	-25.29
0.04952	22.66	-22.66
0.04956	39.57	-39.57
0.0496	19.98	-19.98
0.04964	15	-15
0.04968	41.88	-41.88
0.04972	24.57	-24.57
0.04976	49.86	-49.86
0.0498	14.86	-14.86
0.04984	409.7m	-0.4097
0.04988	18.62	-18.62
0.04992	35.7	-35.7
0.04996	37	-37
0.05	21.33	-21.33
0.05004	42.69	-42.69
0.05008	47.84	-47.84
0.05012	42.46	-42.46
0.05016	35.29	-35.29
0.0502	23.18	-23.18
0.05024	37.95	-37.95
0.05028	31.71	-31.71
0.05032	30.81	-30.81
0.05036	31.28	-31.28
0.0504	26.94	-26.94
0.05044	56.94	-56.94
0.05048	37.17	-37.17
0.05052	26.54	-26.54
0.05056	51.68	-51.68
0.0506	42.46	-42.46
0.05064	54.74	-54.74
0.05068	25.35	-25.35
0.05072	26.85	-26.85
0.05076	41.54	-41.54
0.0508	20.44	-20.44
0.05084	53.82	-53.82
0.05088	33.13	-33.13
0.05092	48.96	-48.96
0.05096	26.62	-26.62
0.051	35.7	-35.7
0.05104	52.32	-52.32
0.05108	38.24	-38.24
0.05112	24.11	-24.11
0.05116	38.04	-38.04
0.0512	30.26	-30.26
0.05124	46.71	-46.71
0.05128	35.73	-35.73
0.05132	17.23	-17.23
0.05136	43.79	-43.79
0.0514	26.05	-26.05
0.05144	29.89	-29.89
0.05148	32.32	-32.32
0.05152	38.36	-38.36
0.05156	35.55	-35.55
0.0516	20.58	-20.58
0.05164	43.82	-43.82
0.05168	27.58	-27.58
0.05172	22.87	-22.87
0.05176	32.32	-32.32
0.0518	46.25	-46.25
0.05184	30.61	-30.61
0.05188	29.95	-29.95
0.05192	16.8	-16.8
0.05196	30.78	-30.78
0.052	36.54	-36.54
0.05204	25	-25
0.05208	32.89	-32.89
0.05212	43.24	-43.24
0.05216	40.15	-40.15
0.0522	32.49	-32.49
0.05224	16.85	-16.85
0.05228	48.15	-48.15
0.05232	28.27	-28.27
0.05236	37.2	-37.2
0.0524	34.31	-34.31
0.05244	34.22	-34.22
0.05248	40.78	-40.78
0.05252	12.84	-12.84
0.05256	24.11	-24.11
0.0526	30.58	-30.58
0.05264	29.8	-29.8
0.05268	34.74	-34.74
0.05272	54.51	-54.51
0.05276	40.52	-40.52
0.0528	37.23	-37.23
0.05284	31.28	-31.28
0.05288	40.26	-40.26
0.05292	33.73	-33.73
0.05296	21.54	-21.54
0.053	35.15	-35.15
0.05304	46.62	-46.62
0.05308	34.6	-34.6
0.05312	32.78	-32.78
0.05316	30.99	-30.99
0.0532	43.82	-43.82
0.05324	52.92	-52.92
0.05328	33.53	-33.53
0.05332	27.37	-27.37
0.05336	12.14	-12.14
0.0534	27	-27
0.05344	30.29	-30.29
0.05348	26.1	-26.1
0.05352	64.05	-64.05
0.05356	26.97	-26.97
0.0536	27.49	-27.49
0.05364	33.21	-33.21
0.05368	37.58	-37.58
0.05372	35.9	-35.9
0.05376	46.62	-46.62
0.0538	37.09	-37.09
0.05384	31.57	-31.57
0.05388	28.18	-28.18
0.05392	25.35	-25.35
0.05396	23.13	-23.13
0.054	25.15	-25.15
0.05404	38.62	-38.62
0.05408	27.14	-27.14
0.05412	18.94	-18.94
0.05416	41.68	-41.68
0.0542	29.02	-29.02
0.05424	37.35	-37.35
0.05428	24.72	-24.72
0.05432	26.83	-26.83
0.05436	24.08	-24.08
0.0544	47.23	-47.23
0.05444	31.71	-31.71
0.05448	47.2	-47.2
0.05452	22.06	-22.06
0.05456	27.69	-27.69
0.0546	62.78	-62.78
0.05464	28.04	-28.04
0.05468	44.05	-44.05
0.05472	72.72	-72.72
0.05476	85.32	-85.32
0.0548	47.78	-47.78
0.05484	69.17	-69.17
0.05488	84.37	-84.37
0.05492	66.94	-66.94
0.05496	34.72	-34.72
0.055	56.68	-56.68
0.05504	93.82	-93.82
0.05508	70.61	-70.61
0.05512	72.23	-72.23
0.05516	59.19	-59.19
0.0552	87	-87
0.05524	88.96	-88.96
0.05528	57.75	-57.75
0.05532	69.02	-69.02
0.05536	87.11	-87.11
0.0554	42.52	-42.52
0.05544	86.36	-86.36
0.05548	75.9	-75.9
0.05552	66.07	-66.07
0.05556	59.63	-59.63
0.0556	73.24	-73.24
0.05564	92.84	-92.84
0.05568	80.67	-80.67
0.05572	56.8	-56.8
0.05576	38.36	-38.36
0.0558	46.85	-46.85
0.05584	70.32	-70.32
0.05588	102.4	-102.4
0.05592	61.68	-61.68
0.05596	62.87	-62.87
0.056	28.47	-28.47
0.05604	49.25	-49.25
0.05608	66.36	-66.36
0.05612	89.77	-89.77
0.05616	89.77	-89.77
0.0562	59.97	-59.97
0.05624	60.78	-60.78
0.05628	61.02	-61.02
0.05632	44.92	-44.92
0.05636	73.79	-73.79
0.0564	79.34	-79.34
0.05644	43.1	-43.1
0.05648	52.95	-52.95
0.05652	54.71	-54.71
0.05656	103.2	-103.2
0.0566	46.07	-46.07
0.05664	28.76	-28.76
0.05668	74.28	-74.28
0.05672	66.48	-66.48
0.05676	66.51	-66.51
0.0568	79.69	-79.69
0.05684	72.06	-72.06
0.05688	39.86	-39.86
0.05692	26.68	-26.68
0.05696	72.95	-72.95
0.057	64.34	-64.34
0.05704	76.28	-76.28
0.05708	40.44	-40.44
0.05712	42.4	-42.4
0.05716	57.98	-57.98
0.0572	63.85	-63.85
0.05724	66.65	-66.65
0.05728	80.78	-80.78
0.05732	66.42	-66.42
0.05736	52.61	-52.61
0.0574	69.86	-69.86
0.05744	72.03	-72.03
0.05748	73.3	-73.3
0.05752	69.6	-69.6
0.05756	63.07	-63.07
0.0576	64.37	-64.37
0.05764	50.35	-50.35
0.05768	48.3	-48.3
0.05772	43.24	-43.24
0.05776	61.74	-61.74
0.0578	49.08	-49.08
0.05784	76.62	-76.62
0.05788	69.22	-69.22
0.05792	59.02	-59.02
0.05796	60.29	-60.29
0.058	28.99	-28.99
0.05804	21.91	-21.91
0.05808	51.42	-51.42
0.05812	75.93	-75.93
0.05816	82.98	-82.98
0.0582	48.3	-48.3
0.05824	32.81	-32.81
0.05828	61.33	-61.33
0.05832	45.03	-45.03
0.05836	54.74	-54.74
0.0584	39.57	-39.57
0.05844	56.28	-56.28
0.05848	43.91	-43.91
0.05852	29.63	-29.63
0.05856	31.77	-31.77
0.0586	60.76	-60.76
0.05864	73.99	-73.99
0.05868	44.6	-44.6
0.05872	32.37	-32.37
0.05876	48.15	-48.15
0.0588	41.85	-41.85
0.05884	37.49	-37.49
0.05888	11.68	-11.68
0.05892	45.26	-45.26
0.05896	32	-32
0.059	41.45	-41.45
0.05904	42.95	-42.95
0.05908	37.63	-37.63
0.05912	41.04	-41.04
0.05916	35.58	-35.58
0.0592	24.66	-24.66
0.05924	37.4	-37.4
0.05928	38.73	-38.73
0.05932	42.98	-42.98
0.05936	21.62	-21.62
0.0594	28.47	-28.47
0.05944	40.55	-40.55
0.05948	58.7	-58.7
0.05952	28.68	-28.68
0.05956	21.33	-21.33
0.0596	35.06	-35.06
0.05964	43.96	-43.96
0.05968	32.14	-32.14
0.05972	17.09	-17.09
0.05976	22.35	-22.35
0.0598	26.13	-26.13
0.05984	36.3	-36.3
0.05988	29.25	-29.25
0.05992	30.24	-30.24
0.05996	37.87	-37.87
0.06	37.61	-37.61
0.06004	33.56	-33.56
0.06008	27.81	-27.81
0.06012	25.15	-25.15
0.06016	26.57	-26.57
0.0602	50.73	-50.73
0.06024	42	-42
0.06028	28.85	-28.85
0.06032	41.88	-41.88
0.06036	30.21	-30.21
0.0604	28.62	-28.62
0.06044	36.57	-36.57
0.06048	11.74	-11.74
0.06052	32.32	-32.32
0.06056	20.29	-20.29
0.0606	35.52	-35.52
0.06064	19.17	-19.17
0.06068	37.32	-37.32
0.06072	16.45	-16.45
0.06076	18.96	-18.96
0.0608	10.79	-10.79
0.06084	40.09	-40.09
0.06088	44.6	-44.6
0.06092	21.05	-21.05
0.06096	18.96	-18.96
0.061	23.53	-23.53
0.06104	28.94	-28.94
0.06108	18.68	-18.68
0.06112	32.55	-32.55
0.06116	39.17	-39.17
0.0612	22.2	-22.2
0.06124	17.63	-17.63
0.06128	-2.509	2.509
0.06132	33.24	-33.24
0.06136	33.21	-33.21
0.0614	28.68	-28.68
0.06144	38.65	-38.65
0.06148	19.69	-19.69
0.06152	23.42	-23.42
0.06156	30.09	-30.09
0.0616	24.72	-24.72
0.06164	1.681	-1.681
0.06168	23.21	-23.21
0.06172	21.77	-21.77
0.06176	21.33	-21.33
0.0618	17.23	-17.23
0.06184	35.26	-35.26
0.06188	23.01	-23.01
0.06192	38.15	-38.15
0.06196	13.3	-13.3
0.062	15.61	-15.61
0.06204	9.831	-9.831
0.06208	6.074	-6.074
0.06212	32.69	-32.69
0.06216	25.78	-25.78
0.0622	43.47	-43.47
0.06224	9.687	-9.687
0.06228	10.41	-10.41
0.06232	30.67	-30.67
0.06236	9.803	-9.803
0.0624	12.52	-12.52
0.06244	21.59	-21.59
0.06248	19.69	-19.69
0.06252	17.4	-17.4
0.06256	17	-17
0.0626	17.06	-17.06
0.06264	11.39	-11.39
0.06268	26.1	-26.1
0.06272	35.7	-35.7
0.06276	27.4	-27.4
0.0628	9.947	-9.947
0.06284	16.05	-16.05
0.06288	24.31	-24.31
0.06292	30.15	-30.15
0.06296	13.42	-13.42
0.063	25.93	-25.93
0.06304	16.25	-16.25
0.06308	28.59	-28.59
0.06312	31.57	-31.57
0.06316	-5.544	5.544
0.0632	17.75	-17.75
0.06324	13.99	-13.99
0.06328	27.43	-27.43
0.06332	16.97	-16.97
0.06336	20.52	-20.52
0.0634	38.15	-38.15
0.06344	22.75	-22.75
0.06348	21.22	-21.22
0.06352	31.13	-31.13
0.06356	26.31	-26.31
0.0636	33.01	-33.01
0.06364	24.77	-24.77
0.06368	36.54	-36.54
0.06372	10.5	-10.5
0.06376	13.33	-13.33
0.0638	25.15	-25.15
0.06384	32.78	-32.78
0.06388	18.88	-18.88
0.06392	34.31	-34.31
0.06396	31.71	-31.71
0.064	27.03	-27.03
0.06404	21.97	-21.97
0.06408	29.95	-29.95
0.06412	23.79	-23.79
0.06416	31.59	-31.59
0.0642	34.89	-34.89
0.06424	25.03	-25.03
0.06428	21.57	-21.57
0.06432	32.43	-32.43
0.06436	43.47	-43.47
0.0644	18.7	-18.7
0.06444	30.52	-30.52
0.06448	16.62	-16.62
0.06452	29.46	-29.46
0.06456	23.65	-23.65
0.0646	28.44	-28.44
0.06464	36.16	-36.16
0.06468	51.88	-51.88
0.06472	33.76	-33.76
0.06476	-14.97	14.97
0.0648	11.45	-11.45
0.06484	15.38	-15.38
0.06488	28.53	-28.53
0.06492	4.282	-4.282
0.06496	-37.77	37.77
0.065	-3.087	3.087
0.06504	27.81	-27.81
0.06508	19.6	-19.6
0.06512	-31.18	31.18
0.06516	-24.85	24.85
0.0652	-18.03	18.03
0.06524	6.595	-6.595
0.06528	5.265	-5.265
0.06532	-18.14	18.14
0.06536	-12.25	12.25
0.0654	9.456	-9.456
0.06544	9.774	-9.774
0.06548	11.85	-11.85
0.06552	-601.9m	0.6019
0.06556	1.248	-1.248
0.0656	20.26	-20.26
0.06564	18.68	-18.68
0.06568	-15.72	15.72
0.06572	13.24	-13.24
0.06576	-8.492	8.492
0.0658	3.271	-3.271
0.06584	20.35	-20.35
0.06588	3.676	-3.676
0.06592	120.7m	-0.1207
0.06596	19.57	-19.57
0.066	19.98	-19.98
0.06604	8.242	-8.242
0.06608	7.144	-7.144
0.06612	2.606	-2.606
0.06616	29.57	-29.57
0.0662	4.514	-4.514
0.06624	23.18	-23.18
0.06628	-4.793	4.793
0.06632	24.08	-24.08
0.06636	3.097	-3.097
0.0664	29.69	-29.69
0.06644	46.16	-46.16
0.06648	33.39	-33.39
0.06652	-4.735	4.735
0.06656	13.53	-13.53
0.0666	8.733	-8.733
0.06664	19.92	-19.92
0.06668	16.68	-16.68
0.06672	-2.48	2.48
0.06676	7.895	-7.895
0.0668	24.54	-24.54
0.06684	20.9	-20.9
0.06688	8.155	-8.155
0.06692	16.25	-16.25
0.06696	12.87	-12.87
0.067	29.05	-29.05
0.06704	8.936	-8.936
0.06708	-2.567	2.567
0.06712	20.41	-20.41
0.06716	6.681	-6.681
0.0672	34.22	-34.22
0.06724	13.7	-13.7
0.06728	24.4	-24.4
0.06732	5.178	-5.178
0.06736	2.606	-2.606
0.0674	-8.492	8.492
0.06744	6.248	-6.248
0.06748	8.993	-8.993
0.06752	15.09	-15.09
0.06756	6.797	-6.797
0.0676	12	-12
0.06764	15.58	-15.58
0.06768	10.79	-10.79
0.06772	29.02	-29.02
0.06776	23.85	-23.85
0.0678	22.89	-22.89
0.06784	32.52	-32.52
0.06788	30.96	-30.96
0.06792	26.02	-26.02
0.06796	11.07	-11.07
0.068	18.65	-18.65
0.06804	27.89	-27.89
0.06808	23.36	-23.36
0.06812	7.086	-7.086
0.06816	15.93	-15.93
0.0682	40.96	-40.96
0.06824	-3.087	3.087
0.06828	26.31	-26.31
0.06832	35.61	-35.61
0.06836	14.14	-14.14
0.0684	5.438	-5.438
0.06844	12.81	-12.81
0.06848	36.97	-36.97
0.06852	51.71	-51.71
0.06856	24.25	-24.25
0.0686	41.85	-41.85
0.06864	11.59	-11.59
0.06868	41.85	-41.85
0.06872	33.76	-33.76
0.06876	8.589	-8.589
0.0688	21.59	-21.59
0.06884	46.48	-46.48
0.06888	39.08	-39.08
0.06892	27.52	-27.52
0.06896	35.58	-35.58
0.069	23.39	-23.39
0.06904	46.91	-46.91
0.06908	34.11	-34.11
0.06912	32.49	-32.49
0.06916	32.29	-32.29
0.0692	42.92	-42.92
0.06924	32.55	-32.55
0.06928	37.32	-37.32
0.06932	17.89	-17.89
0.06936	29.6	-29.6
0.0694	13.56	-13.56
0.06944	49.86	-49.86
0.06948	29.48	-29.48
0.06952	19.05	-19.05
0.06956	44.51	-44.51
0.0696	25.44	-25.44
0.06964	51.48	-51.48
0.06968	31.59	-31.59
0.06972	26.62	-26.62
0.06976	36.68	-36.68
0.0698	25.76	-25.76
0.06984	49.28	-49.28
0.06988	27.29	-27.29
0.06992	32.11	-32.11
0.06996	21.71	-21.71
0.07	23.62	-23.62
0.07004	29.25	-29.25
0.07008	34.89	-34.89
0.07012	23.79	-23.79
0.07016	20.76	-20.76
0.0702	29.63	-29.63
0.07024	35.78	-35.78
0.07028	48.44	-48.44
0.07032	40.26	-40.26
0.07036	10.73	-10.73
0.0704	44.4	-44.4
0.07044	41.94	-41.94
0.07048	38.53	-38.53
0.07052	22.63	-22.63
0.07056	16.8	-16.8
0.0706	45.93	-45.93
0.07064	55.26	-55.26
0.07068	27.23	-27.23
0.07072	27.43	-27.43
0.07076	29.89	-29.89
0.0708	50.06	-50.06
0.07084	26.16	-26.16
0.07088	23.36	-23.36
0.07092	31.51	-31.51
0.07096	28.56	-28.56
0.071	34.48	-34.48
0.07104	43.79	-43.79
0.07108	37	-37
0.07112	42.11	-42.11
0.07116	37.46	-37.46
0.0712	31.88	-31.88
0.07124	36.68	-36.68
0.07128	56.13	-56.13
0.07132	35.87	-35.87
0.07136	23.5	-23.5
0.0714	42	-42
0.07144	35.61	-35.61
0.07148	32.87	-32.87
0.07152	31.48	-31.48
0.07156	14.48	-14.48
0.0716	46.07	-46.07
0.07164	33.99	-33.99
0.07168	27.14	-27.14
0.07172	35.24	-35.24
0.07176	29.83	-29.83
0.0718	29.34	-29.34
0.07184	23.47	-23.47
0.07188	39.28	-39.28
0.07192	31.54	-31.54
0.07196	64.51	-64.51
0.072	26.07	-26.07
0.07204	32.37	-32.37
0.07208	14.37	-14.37
0.07212	28.53	-28.53
0.07216	27.35	-27.35
0.0722	35.03	-35.03
0.07224	25.47	-25.47
0.07228	33.1	-33.1
0.07232	45.32	-45.32
0.07236	34.6	-34.6
0.0724	31.71	-31.71
0.07244	40.96	-40.96
0.07248	44.57	-44.57
0.07252	28.68	-28.68
0.07256	46.54	-46.54
0.0726	35.47	-35.47
0.07264	25.09	-25.09
0.07268	35.12	-35.12
0.07272	38.59	-38.59
0.07276	53.39	-53.39
0.0728	38.07	-38.07
0.07284	29.2	-29.2
0.07288	19.6	-19.6
0.07292	60.76	-60.76
0.07296	32.26	-32.26
0.073	23.62	-23.62
0.07304	31.54	-31.54
0.07308	47.14	-47.14
0.07312	33.04	-33.04
0.07316	23.24	-23.24
0.0732	45.67	-45.67
0.07324	39.83	-39.83
0.07328	38.88	-38.88
0.07332	35.12	-35.12
0.07336	43.3	-43.3
0.0734	37.46	-37.46
0.07344	33.82	-33.82
0.07348	31.42	-31.42
0.07352	41.51	-41.51
0.07356	44.02	-44.02
0.0736	24.17	-24.17
0.07364	25.78	-25.78
0.07368	34.72	-34.72
0.07372	34.6	-34.6
0.07376	31.13	-31.13
0.0738	25.99	-25.99
0.07384	14.72	-14.72
0.07388	37.84	-37.84
0.07392	27.35	-27.35
0.07396	30.24	-30.24
0.074	54.54	-54.54
0.07404	30.87	-30.87
0.07408	35.03	-35.03
0.07412	44.6	-44.6
0.07416	29.51	-29.51
0.0742	44.43	-44.43
0.07424	22.52	-22.52
0.07428	31.54	-31.54
0.07432	25.73	-25.73
0.07436	44.28	-44.28
0.0744	47.87	-47.87
0.07444	31.65	-31.65
0.07448	32.03	-32.03
0.07452	17.32	-17.32
0.07456	26.71	-26.71
0.0746	24.46	-24.46
0.07464	40.09	-40.09
0.07468	31.36	-31.36
0.07472	32.81	-32.81
0.07476	27.35	-27.35
0.0748	81.65	-81.65
0.07484	129.9	-129.9
0.07488	91.25	-91.25
0.07492	41.16	-41.16
0.07496	26.42	-26.42
0.075	77.63	-77.63
0.07504	106.1	-106.1
0.07508	85.21	-85.21
0.07512	47.14	-47.14
0.07516	67.49	-67.49
0.0752	84.83	-84.83
0.07524	47.37	-47.37
0.07528	53.44	-53.44
0.07532	83.24	-83.24
0.07536	86.85	-86.85
0.0754	64.8	-64.8
0.07544	39.02	-39.02
0.07548	80.58	-80.58
0.07552	85.38	-85.38
0.07556	98.59	-98.59
0.0756	78.93	-78.93
0.07564	38.33	-38.33
0.07568	53.96	-53.96
0.07572	85.06	-85.06
0.07576	67.89	-67.89
0.0758	67.14	-67.14
0.07584	52.52	-52.52
0.07588	80.52	-80.52
0.07592	48.67	-48.67
0.07596	74.92	-74.92
0.076	70.52	-70.52
0.07604	41.91	-41.91
0.07608	60.21	-60.21
0.07612	78.96	-78.96
0.07616	71.71	-71.71
0.0762	53.01	-53.01
0.07624	31.74	-31.74
0.07628	78.73	-78.73
0.07632	85.26	-85.26
0.07636	79.08	-79.08
0.0764	88.59	-88.59
0.07644	77.84	-77.84
0.07648	71.51	-71.51
0.07652	37.26	-37.26
0.07656	40.18	-40.18
0.0766	75.06	-75.06
0.07664	84.63	-84.63
0.07668	91.74	-91.74
0.07672	40.78	-40.78
0.07676	58.33	-58.33
0.0768	55.38	-55.38
0.07684	68.62	-68.62
0.07688	71.71	-71.71
0.07692	86.77	-86.77
0.07696	58.91	-58.91
0.077	38.21	-38.21
0.07704	66.94	-66.94
0.07708	65.9	-65.9
0.07712	59.02	-59.02
0.07716	65.35	-65.35
0.0772	68.44	-68.44
0.07724	63.1	-63.1
0.07728	59.02	-59.02
0.07732	54.57	-54.57
0.07736	83.76	-83.76
0.0774	69.97	-69.97
0.07744	48.56	-48.56
0.07748	24.05	-24.05
0.07752	73.27	-73.27
0.07756	52.29	-52.29
0.0776	58.01	-58.01
0.07764	83.99	-83.99
0.07768	62.37	-62.37
0.07772	67.66	-67.66
0.07776	39.86	-39.86
0.0778	57.06	-57.06
0.07784	48.56	-48.56
0.07788	59.54	-59.54
0.07792	52.52	-52.52
0.07796	56.54	-56.54
0.078	65.32	-65.32
0.07804	43.99	-43.99
0.07808	59.74	-59.74
0.07812	44.54	-44.54
0.07816	33.67	-33.67
0.0782	16.36	-16.36
0.07824	52	-52
0.07828	44.11	-44.11
0.07832	49.4	-49.4
0.07836	53.79	-53.79
0.0784	26.54	-26.54
0.07844	37.49	-37.49
0.07848	38.93	-38.93
0.07852	38.65	-38.65
0.07856	73.44	-73.44
0.0786	70.96	-70.96
0.07864	38.01	-38.01
0.07868	42.11	-42.11
0.07872	27.69	-27.69
0.07876	58.47	-58.47
0.0788	67.75	-67.75
0.07884	44.63	-44.63
0.07888	45.03	-45.03
0.07892	50.41	-50.41
0.07896	40.78	-40.78
0.079	25.09	-25.09
0.07904	41.88	-41.88
0.07908	39.43	-39.43
0.07912	49.17	-49.17
0.07916	40.47	-40.47
0.0792	34.95	-34.95
0.07924	38.53	-38.53
0.07928	46.77	-46.77
0.07932	35.09	-35.09
0.07936	35.73	-35.73
0.0794	60	-60
0.07944	20.67	-20.67
0.07948	44.31	-44.31
0.07952	53.21	-53.21
0.07956	21.19	-21.19
0.0796	63.88	-63.88
0.07964	44.77	-44.77
0.07968	38.21	-38.21
0.07972	19.72	-19.72
0.07976	27.66	-27.66
0.0798	20.21	-20.21
0.07984	33.13	-33.13
0.07988	15.67	-15.67
0.07992	35.24	-35.24
[truncated: 98,001 more rows]

## Sheet: Sheet1
		100	2500
time	data	butfilt1	Stress
0.6	9255	9271.62	3.70865
0.60004	9358	9251.57	3.70063
0.60008	9486	9230.79	3.69232
0.60012	9643	9209.28	3.68371
0.60016	9775	9187.02	3.67481
0.6002	9968	9164	3.6656
0.60024	10130	9140.2	3.65608
0.60028	10280	9115.62	3.64625
0.60032	10440	9090.24	3.6361
0.60036	10570	9064.06	3.62562
0.6004	10650	9037.05	3.61482
0.60044	10690	9009.22	3.60369
0.60048	10730	8980.55	3.59222
0.60052	10720	8951.03	3.58041
0.60056	10640	8920.66	3.56826
0.6006	10570	8889.43	3.55577
0.60064	10490	8857.32	3.54293
0.60068	10400	8824.35	3.52974
0.60072	10290	8790.5	3.5162
0.60076	10270	8755.76	3.5023
0.6008	10230	8720.13	3.48805
0.60084	10250	8683.61	3.47345
0.60088	10260	8646.2	3.45848
0.60092	10300	8607.9	3.44316
0.60096	10300	8568.69	3.42748
0.601	10290	8528.59	3.41144
0.60104	10260	8487.59	3.39503
0.60108	10230	8445.69	3.37827
0.60112	10210	8402.89	3.36116
0.60116	10180	8359.2	3.34368
0.6012	10170	8314.61	3.32585
0.60124	10190	8269.14	3.30766
0.60128	10190	8222.78	3.28911
0.60132	10190	8175.55	3.27022
0.60136	10160	8127.44	3.25097
0.6014	10120	8078.46	3.23138
0.60144	10060	8028.62	3.21145
0.60148	9986	7977.93	3.19117
0.60152	9935	7926.4	3.17056
0.60156	9875	7874.03	3.14961
0.6016	9812	7820.84	3.12834
0.60164	9772	7766.84	3.10674
0.60168	9692	7712.04	3.08482
0.60172	9662	7656.46	3.06258
0.60176	9620	7600.1	3.04004
0.6018	9593	7542.98	3.01719
0.60184	9559	7485.12	2.99405
0.60188	9497	7426.54	2.97061
0.60192	9426	7367.24	2.9469
0.60196	9312	7307.25	2.9229
0.602	9177	7246.59	2.89864
0.60204	8991	7185.28	2.87411
0.60208	8793	7123.33	2.84933
0.60212	8608	7060.77	2.82431
0.60216	8414	6997.62	2.79905
0.6022	8232	6933.9	2.77356
0.60224	8009	6869.64	2.74785
0.60228	7842	6804.85	2.72194
0.60232	7656	6739.56	2.69582
0.60236	7480	6673.8	2.66952
0.6024	7298	6607.58	2.64303
0.60244	7105	6540.95	2.61638
0.60248	6965	6473.91	2.58956
0.60252	6798	6406.49	2.5626
0.60256	6620	6338.73	2.53549
0.6026	6459	6270.64	2.50826
0.60264	6235	6202.25	2.4809
0.60268	6049	6133.59	2.45344
0.60272	5925	6064.69	2.42587
0.60276	5809	5995.56	2.39822
0.6028	5750	5926.24	2.3705
0.60284	5634	5856.75	2.3427
0.60288	5553	5787.11	2.31485
0.60292	5438	5717.36	2.28694
0.60296	5291	5647.52	2.25901
0.603	5149	5577.61	2.23104
0.60304	5014	5507.65	2.20306
0.60308	4846	5437.68	2.17507
0.60312	4716	5367.72	2.14709
0.60316	4623	5297.79	2.11912
0.6032	4519	5227.92	2.09117
0.60324	4435	5158.13	2.06325
0.60328	4309	5088.44	2.03538
0.60332	4183	5018.88	2.00755
0.60336	4041	4949.48	1.97979
0.6034	3872	4880.24	1.9521
0.60344	3704	4811.21	1.92448
0.60348	3494	4742.39	1.89696
0.60352	3299	4673.82	1.86953
0.60356	3111	4605.5	1.8422
0.6036	2936	4537.47	1.81499
0.60364	2783	4469.74	1.7879
0.60368	2635	4402.34	1.76093
0.60372	2519	4335.27	1.73411
0.60376	2436	4268.56	1.70742
0.6038	2437	4202.23	1.68089
0.60384	2409	4136.29	1.65452
0.60388	2434	4070.76	1.6283
0.60392	2530	4005.65	1.60226
0.60396	2582	3940.98	1.57639
0.604	2659	3876.76	1.5507
0.60404	2688	3813	1.5252
0.60408	2721	3749.73	1.49989
0.60412	2669	3686.94	1.47478
0.60416	2642	3624.66	1.44986
0.6042	2605	3562.89	1.42516
0.60424	2573	3501.65	1.40066
0.60428	2513	3440.95	1.37638
0.60432	2430	3380.79	1.35231
0.60436	2327	3321.18	1.32847
0.6044	2211	3262.15	1.30486
0.60444	2031	3203.69	1.28148
0.60448	1843	3145.81	1.25833
0.60452	1695	3088.53	1.23541
0.60456	1525	3031.85	1.21274
0.6046	1458	2975.78	1.19031
0.60464	1391	2920.32	1.16813
0.60468	1387	2865.49	1.14619
0.60472	1372	2811.28	1.12451
0.60476	1388	2757.7	1.10308
0.6048	1420	2704.76	1.0819
0.60484	1428	2652.46	1.06098
0.60488	1461	2600.81	1.04032
0.60492	1499	2549.8	1.01992
0.60496	1509	2499.44	0.999774
0.605	1511	2449.73	0.97989
0.60504	1466	2400.67	0.960267
0.60508	1397	2352.26	0.940905
0.60512	1336	2304.51	0.921805
0.60516	1278	2257.42	0.902967
0.6052	1278	2210.98	0.884391
0.60524	1279	2165.19	0.866077
0.60528	1228	2120.06	0.848024
0.60532	1201	2075.58	0.830232
0.60536	1228	2031.75	0.812701
0.6054	1257	1988.57	0.79543
0.60544	1308	1946.04	0.778417
0.60548	1316	1904.16	0.761663
0.60552	1335	1862.91	0.745166
0.60556	1403	1822.31	0.728924
0.6056	1448	1782.34	0.712937
0.60564	1480	1743.01	0.697204
0.60568	1542	1704.31	0.681722
0.60572	1638	1666.23	0.666492
0.60576	1706	1628.77	0.65151
0.6058	1770	1591.94	0.636776
0.60584	1767	1555.72	0.622288
0.60588	1802	1520.11	0.608046
0.60592	1761	1485.12	0.594047
0.60596	1636	1450.73	0.58029
0.606	1466	1416.94	0.566775
0.60604	1306	1383.75	0.553499
0.60608	1098	1351.15	0.540462
0.60612	899.3	1319.15	0.527662
0.60616	749.2	1287.75	0.515098
0.6062	607.7	1256.92	0.502769
0.60624	501.1	1226.68	0.490673
0.60628	394.6	1197.02	0.478809
0.60632	285.9	1167.94	0.467175
0.60636	251.1	1139.42	0.455769
0.6064	255.3	1111.47	0.444589
0.60644	282.9	1084.09	0.433634
0.60648	324.1	1057.25	0.422901
0.60652	342.8	1030.97	0.412388
0.60656	395.1	1005.23	0.402091
0.6066	467.5	980.025	0.39201
0.60664	540	955.353	0.382141
0.60668	613.5	931.203	0.372481
0.60672	703.7	907.57	0.363028
0.60676	784.7	884.447	0.353779
0.6068	861.4	861.826	0.34473
0.60684	924.6	839.7	0.33588
0.60688	951.4	818.061	0.327225
0.60692	985.8	796.904	0.318762
0.60696	983.3	776.22	0.310488
0.607	945.2	756.002	0.302401
0.60704	923.6	736.243	0.294497
0.60708	839.7	716.937	0.286775
0.60712	811.3	698.077	0.279231
0.60716	755.2	679.656	0.271862
0.6072	711.9	661.666	0.264666
0.60724	684	644.102	0.257641
0.60728	651.2	626.956	0.250782
0.60732	651.3	610.223	0.244089
0.60736	655.5	593.894	0.237558
0.6074	674.4	577.964	0.231186
0.60744	700.3	562.426	0.22497
0.60748	733.4	547.274	0.218909
0.60752	720.4	532.5	0.213
0.60756	707.6	518.098	0.207239
0.6076	701.5	504.063	0.201625
0.60764	691.1	490.387	0.196155
0.60768	689.8	477.065	0.190826
0.60772	642.2	464.089	0.185636
0.60776	615.2	451.455	0.180582
0.6078	511.5	439.156	0.175663
0.60784	450.7	427.187	0.170875
0.60788	408.1	415.54	0.166216
0.60792	326	404.211	0.161684
0.60796	287.2	393.193	0.157277
0.608	228.2	382.481	0.152992
0.60804	194.6	372.068	0.148827
0.60808	137.2	361.949	0.14478
0.60812	92.62	352.117	0.140847
0.60816	97.31	342.566	0.137026
0.6082	152.9	333.29	0.133316
0.60824	225.1	324.283	0.129713
0.60828	323.7	315.537	0.126215
0.60832	410.4	307.047	0.122819
0.60836	533	298.806	0.119523
0.6084	616.7	290.808	0.116323
0.60844	678.1	283.046	0.113218
0.60848	723.1	275.513	0.110205
0.60852	745.6	268.205	0.107282
0.60856	728.1	261.115	0.104446
0.6086	698.7	254.236	0.101695
0.60864	716	247.565	0.099026
0.60868	700.3	241.095	0.096438
0.60872	689	234.821	0.0939285
0.60876	668.4	228.739	0.0914955
0.6088	622.1	222.843	0.089137
0.60884	606.8	217.128	0.0868513
0.60888	563.5	211.591	0.0846365
0.60892	530.3	206.227	0.0824909
0.60896	488.3	201.032	0.0804128
0.609	436.5	196.002	0.0784007
0.60904	394.7	191.132	0.0764528
0.60908	360.8	186.419	0.0745678
0.60912	320.6	181.86	0.072744
0.60916	314.9	177.45	0.0709801
0.6092	327.6	173.186	0.0692746
0.60924	351.7	169.065	0.0676259
0.60928	407.6	165.082	0.0660328
0.60932	432.7	161.235	0.0644939
0.60936	487.6	157.52	0.0630079
0.6094	510.4	153.933	0.0615733
0.60944	497.6	150.473	0.0601891
0.60948	495.4	147.135	0.058854
0.60952	441	143.917	0.0575669
0.60956	396.7	140.817	0.0563267
0.6096	312.5	137.831	0.0551324
0.60964	236.1	134.958	0.053983
0.60968	161.3	132.194	0.0528775
0.60972	77.77	129.538	0.0518151
0.60976	52.74	126.987	0.0507947
0.6098	-20.12	124.538	0.0498154
0.60984	-26.8	122.191	0.0488762
0.60988	-78.73	119.941	0.0479762
0.60992	-102.7	117.786	0.0471144
0.60996	-115.3	115.724	0.0462897
0.61	-139.8	113.753	0.045501
0.61004	-120.1	111.868	0.0447473
0.61008	-77.32	110.069	0.0440274
0.61012	-44.86	108.35	0.0433402
0.61016	41.93	106.711	0.0426843
0.6102	94.33	105.147	0.0420586
0.61024	180.5	103.655	0.0414619
0.61028	281.3	102.232	0.0408928
0.61032	341.7	100.876	0.0403502
0.61036	466.1	99.5822	0.0398329
0.6104	523.8	98.3491	0.0393396
0.61044	547.2	97.1735	0.0388694
0.61048	538.2	96.0527	0.0384211
0.61052	555.9	94.9844	0.0379938
0.61056	494.5	93.9663	0.0375865
0.6106	415.9	92.9963	0.0371985
0.61064	349.6	92.0725	0.036829
0.61068	326.8	91.1931	0.0364772
0.61072	263.6	90.3563	0.0361425
0.61076	225	89.5607	0.0358243
0.6108	206.7	88.8046	0.0355218
0.61084	158.3	88.0866	0.0352347
0.61088	131.8	87.4054	0.0349622
0.61092	155.7	86.7594	0.0347038
0.61096	125.5	86.1474	0.034459
0.611	156.3	85.5679	0.0342272
0.61104	161.1	85.0197	0.0340079
0.61108	151.8	84.5015	0.0338006
0.61112	172.6	84.012	0.0336048
0.61116	165.3	83.5499	0.03342
0.6112	189.7	83.1141	0.0332457
0.61124	197.2	82.7034	0.0330814
0.61128	243.3	82.3167	0.0329267
0.61132	262.2	81.9528	0.0327811
0.61136	277.9	81.6108	0.0326443
0.6114	288.8	81.2897	0.0325159
0.61144	286.8	80.9886	0.0323955
0.61148	266.8	80.7069	0.0322827
0.61152	216.3	80.4436	0.0321775
0.61156	123.7	80.1983	0.0320793
0.6116	74.27	79.9704	0.0319881
0.61164	34.97	79.7591	0.0319037
0.61168	-22.95	79.5641	0.0318256
0.61172	-33.91	79.3846	0.0317539
0.61176	-48.21	79.2202	0.0316881
0.6118	-35.26	79.07	0.031628
0.61184	-38.65	78.9334	0.0315734
0.61188	-28.94	78.8096	0.0315239
0.61192	-14.95	78.6979	0.0314792
0.61196	33.09	78.5973	0.0314389
0.612	21.9	78.507	0.0314028
0.61204	83.46	78.4261	0.0313704
0.61208	93.35	78.3536	0.0313415
0.61212	120	78.2887	0.0313155
0.61216	161.4	78.2304	0.0312922
0.6122	194.4	78.1779	0.0312711
0.61224	223.5	78.1301	0.0312521
0.61228	237.5	78.0865	0.0312346
0.61232	241.5	78.0461	0.0312184
0.61236	234.7	78.0082	0.0312033
0.6124	226.5	77.9723	0.0311889
0.61244	201.2	77.9377	0.0311751
0.61248	163.6	77.904	0.0311616
0.61252	133.3	77.8706	0.0311482
0.61256	65.4	77.8371	0.0311348
0.6126	2.48	77.8031	0.0311213
0.61264	-36.77	77.7682	0.0311073
0.61268	-50.38	77.7319	0.0310927
0.61272	-51.42	77.6936	0.0310775
0.61276	-54.66	77.653	0.0310612
0.6128	7.162	77.6093	0.0310437
0.61284	60.77	77.5619	0.0310248
0.61288	98.06	77.5103	0.0310041
0.61292	130.9	77.4536	0.0309814
0.61296	144.5	77.3912	0.0309565
0.613	157.1	77.3225	0.030929
0.61304	116.8	77.2468	0.0308987
0.61308	85.25	77.1636	0.0308655
0.61312	86.76	77.0723	0.0308289
0.61316	22.13	76.9722	0.0307889
0.6132	12.34	76.8629	0.0307452
0.61324	-21.22	76.7437	0.0306975
0.61328	-38.07	76.6139	0.0306456
0.61332	-37.09	76.473	0.0305892
0.61336	-17.2	76.3201	0.0305281
0.6134	11.38	76.1547	0.0304619
0.61344	47.6	75.9758	0.0303903
0.61348	85.51	75.7827	0.0303131
0.61352	110.2	75.5746	0.0302298
0.61356	151.7	75.3507	0.0301403
0.6136	151	75.1101	0.030044
0.61364	143.2	74.852	0.0299408
0.61368	149.6	74.5758	0.0298303
0.61372	180.9	74.2807	0.0297123
0.61376	226.5	73.9661	0.0295864
0.6138	295.6	73.6312	0.0294525
0.61384	335.7	73.2756	0.0293102
0.61388	342.4	72.8987	0.0291595
0.61392	352.3	72.5002	0.0290001
0.61396	376.6	72.0797	0.0288319
0.614	363.3	71.6371	0.0286548
0.61404	346.7	71.1724	0.0284689
0.61408	299.1	70.6855	0.0282742
0.61412	277.6	70.1768	0.0280707
0.61416	246.8	69.6463	0.0278585
0.6142	228.1	69.0946	0.0276378
0.61424	197.7	68.5219	0.0274088
0.61428	186.6	67.9288	0.0271715
0.61432	189.8	67.3159	0.0269263
0.61436	210.8	66.6836	0.0266734
0.6144	234.9	66.0326	0.026413
0.61444	221.2	65.3637	0.0261455
0.61448	203.4	64.6775	0.025871
0.61452	184	63.9749	0.02559
0.61456	163.1	63.2567	0.0253027
0.6146	120.3	62.524	0.0250096
0.61464	81.67	61.7776	0.024711
0.61468	74.53	61.0184	0.0244074
0.61472	50.75	60.2476	0.024099
0.61476	13.46	59.466	0.0237864
0.6148	28.92	58.6748	0.0234699
0.61484	26.79	57.8748	0.0231499
0.61488	28.38	57.067	0.0228268
0.61492	13.41	56.2523	0.0225009
0.61496	-13.82	55.4318	0.0221727
0.615	5.168	54.6063	0.0218425
0.61504	-20.41	53.7768	0.0215107
0.61508	-69.95	52.944	0.0211776
0.61512	-75.32	52.1089	0.0208435
0.61516	1.295	51.2722	0.0205089
0.6152	9.301	50.4346	0.0201739
0.61524	-8.184	49.597	0.0198388
0.61528	-52	48.7601	0.019504
0.61532	0.8042	47.9244	0.0191698
0.61536	32.6	47.0907	0.0188363
0.6154	-18.53	46.2595	0.0185038
0.61544	9.764	45.4316	0.0181726
0.61548	-6.306	44.6075	0.017843
0.61552	-29.51	43.7878	0.0175151
0.61556	-54.31	42.973	0.0171892
0.6156	-77.11	42.1637	0.0168655
0.61564	-7.346	41.3603	0.0165441
0.61568	-7.23	40.5634	0.0162254
0.61572	-0.3519	39.7733	0.0159093
0.61576	-25.55	38.9905	0.0155962
0.6158	39.88	38.2153	0.0152861
0.61584	9.619	37.4481	0.0149792
0.61588	8.579	36.6893	0.0146757
0.61592	50.25	35.9392	0.0143757
0.61596	94.65	35.1982	0.0140793
0.616	130.4	34.4667	0.0137867
0.61604	135.5	33.745	0.013498
0.61608	23.75	33.0335	0.0132134
0.61612	-129.2	32.3327	0.0129331
0.61616	-161.7	31.643	0.0126572
0.6162	-156.2	30.9648	0.0123859
0.61624	-164.2	30.2983	0.0121193
0.61628	-54.48	29.6438	0.0118575
0.61632	-31.74	29.0016	0.0116006
0.61636	-35.03	28.3716	0.0113486
0.6164	79.62	27.754	0.0111016
0.61644	67.71	27.1489	0.0108596
0.61648	51.76	26.5564	0.0106226
0.61652	142.3	25.9766	0.0103906
0.61656	200.7	25.4096	0.0101638
0.6166	112.3	24.8556	0.00994226
0.61664	113	24.3149	0.00972596
0.61668	-52.63	23.7876	0.00951505
0.61672	-212.4	23.2741	0.00930965
0.61676	-174.8	22.7746	0.00910985
0.6168	-160.6	22.2893	0.00891573
0.61684	-147.8	21.8183	0.00872733
0.61688	-4.658	21.3617	0.00854466
0.61692	59.13	20.9193	0.00836772
0.61696	64.24	20.4912	0.0081965
0.617	116.9	20.0774	0.00803097
0.61704	108.2	19.6779	0.00787114
0.61708	123.5	19.2925	0.00771702
0.61712	68.87	18.9216	0.00756862
0.61716	19.56	18.565	0.00742599
0.6172	35.57	18.2229	0.00728917
0.61724	-21.48	17.8955	0.00715821
0.61728	-74.05	17.5829	0.00703315
0.61732	-82.03	17.2851	0.00691404
0.61736	-33.41	17.0022	0.00680089
0.6174	-96.51	16.7343	0.00669374
0.61744	-79.95	16.4814	0.00659258
0.61748	-24.02	16.2435	0.00649739
0.61752	-14.86	16.0204	0.00640817
0.61756	53.35	15.8122	0.00632486
0.6176	51.61	15.6186	0.00624745
0.61764	6.729	15.4397	0.00617588
0.61768	-51.54	15.2754	0.00611015
0.61772	-36.28	15.1255	0.0060502
0.61776	-3.733	14.99	0.00599601
0.6178	-62.81	14.8688	0.00594752
0.61784	-4.514	14.7617	0.00590469
0.61788	-29.17	14.6686	0.00586745
0.61792	-6.45	14.5893	0.00583574
0.61796	6.642	14.5237	0.00580948
0.618	-7.664	14.4715	0.00578859
0.61804	-43.41	14.4325	0.00577301
0.61808	-47.87	14.4066	0.00576264
0.61812	-30.96	14.3935	0.0057574
0.61816	-31.74	14.393	0.00575718
0.6182	-2.953	14.4047	0.00576188
0.61824	12.51	14.4285	0.00577139
0.61828	19.79	14.464	0.00578558
0.61832	30.89	14.5109	0.00580434
0.61836	-13.42	14.5689	0.00582756
0.6184	-5.063	14.6378	0.00585511
0.61844	0.1394	14.7172	0.00588688
0.61848	-19.77	14.8069	0.00592274
0.61852	29.19	14.9064	0.00596258
0.61856	66.15	15.0156	0.00600625
0.6186	50.34	15.1341	0.00605365
0.61864	43.78	15.2616	0.00610463
0.61868	36.73	15.3978	0.0061591
0.61872	59.21	15.5424	0.00621695
0.61876	73.92	15.6951	0.00627806
0.6188	58.49	15.8558	0.00634233
0.61884	76	16.0242	0.00640969
0.61888	59.42	16.2001	0.00648004
0.61892	40.46	16.3833	0.00655332
0.61896	48.14	16.5736	0.00662944
0.619	45.05	16.7709	0.00670836
0.61904	43.2	16.975	0.00679001
0.61908	47.8	17.1859	0.00687434
0.61912	78.63	17.4033	0.0069613
0.61916	89.21	17.6271	0.00705086
0.6192	75.51	17.8574	0.00714296
0.61924	46.9	18.094	0.0072376
0.61928	11.87	18.3369	0.00733475
0.61932	-3.04	18.586	0.00743441
0.61936	-12.78	18.8414	0.00753655
0.6194	-24.89	19.103	0.00764118
0.61944	-32.81	19.3707	0.00774826
0.61948	-16.33	19.6444	0.00785778
0.61952	12.83	19.9242	0.00796969
0.61956	22.1	20.2099	0.00808397
0.6196	26.53	20.5014	0.00820056
0.61964	15.54	20.7986	0.00831944
0.61968	3.694	21.1014	0.00844056
0.61972	7.105	21.4097	0.00856387
0.61976	17.42	21.7234	0.00868934
0.6198	9.128	22.0423	0.00881692
0.61984	-8.271	22.3664	0.00894657
0.61988	-28.18	22.6956	0.00907823
0.61992	-17.69	23.0296	0.00921185
0.61996	-35.99	23.3684	0.00934737
0.62	-28.76	23.7118	0.00948471
0.62004	-35.09	24.0595	0.00962381
0.62008	-8.531	24.4115	0.00976458
0.62012	35.11	24.7673	0.00990692
0.62016	38.69	25.1268	0.0100507
0.6202	32.8	25.4898	0.0101959
0.62024	33.84	25.856	0.0103424
0.62028	-0.323	26.2252	0.0104901
0.62032	16.15	26.5971	0.0106388
0.62036	-31.13	26.9714	0.0107886
0.6204	-8.184	27.348	0.0109392
0.62044	-10.64	27.7265	0.0110906
0.62048	-8.271	28.1067	0.0112427
0.62052	22.97	28.4882	0.0113953
0.62056	21.3	28.8708	0.0115483
0.6206	4.793	29.2542	0.0117017
0.62064	20.54	29.6379	0.0118552
0.62068	22.91	30.0217	0.0120087
0.62072	19.45	30.4053	0.0121621
0.62076	34.68	30.7882	0.0123153
0.6208	58.26	31.1702	0.0124681
0.62084	38.81	31.5509	0.0126204
0.62088	31.55	31.9301	0.012772
0.62092	70.4	32.3072	0.0129229
0.62096	59.76	32.6821	0.0130729
0.621	75.22	33.0545	0.0132218
0.62104	126.6	33.4239	0.0133696
0.62108	192	33.7902	0.0135161
0.62112	256.9	34.1532	0.0136613
0.62116	251.5	34.5125	0.013805
0.6212	281.8	34.8682	0.0139473
0.62124	222.6	35.2203	0.0140881
0.62128	141.8	35.5688	0.0142275
0.62132	90.57	35.9138	0.0143655
0.62136	52.86	36.2556	0.0145022
0.6214	-11.02	36.5944	0.0146377
0.62144	-13.79	36.9304	0.0147721
0.62148	-21.22	37.2638	0.0149055
0.62152	-47.11	37.5948	0.0150379
0.62156	4.33	37.9236	0.0151694
0.6216	14.82	38.2503	0.0153001
0.62164	36.67	38.5751	0.01543
0.62168	96.55	38.8981	0.0155592
0.62172	139.9	39.2194	0.0156877
0.62176	112	39.5391	0.0158156
0.6218	99.47	39.8574	0.015943
0.62184	41.41	40.1746	0.0160698
0.62188	-16.97	40.4908	0.0161963
0.62192	-36.97	40.8063	0.0163225
0.62196	-40.9	41.1213	0.0164485
0.622	-20.06	41.4359	0.0165743
0.62204	27.88	41.7503	0.0167001
0.62208	60.57	42.0646	0.0168258
0.62212	52.02	42.379	0.0169516
0.62216	74.13	42.6935	0.0170774
0.6222	75.86	43.0083	0.0172033
0.62224	43.12	43.3236	0.0173294
0.62228	33	43.6394	0.0174558
0.62232	35.46	43.956	0.0175824
0.62236	19.45	44.2735	0.0177094
0.6224	11.27	44.5919	0.0178368
0.62244	12.13	44.9115	0.0179646
0.62248	-27.84	45.2324	0.018093
0.62252	-10.15	45.5547	0.0182219
0.62256	7.596	45.8784	0.0183513
0.6226	17.51	46.2036	0.0184814
0.62264	21.32	46.5303	0.0186121
0.62268	54.21	46.8587	0.0187435
0.62272	75.37	47.1886	0.0188755
0.62276	55.63	47.5202	0.0190081
0.6228	73.9	47.8535	0.0191414
0.62284	27.31	48.1884	0.0192754
0.62288	-21.02	48.5251	0.01941
0.62292	-39.63	48.8636	0.0195454
0.62296	-51.36	49.2038	0.0196815
0.623	-37.11	49.5458	0.0198183
0.62304	-14.89	49.8895	0.0199558
0.62308	11.12	50.2348	0.0200939
0.62312	2.798	50.5815	0.0202326
0.62316	-2.404	50.9296	0.0203718
0.6232	47.94	51.2789	0.0205115
0.62324	15.11	51.6291	0.0206516
0.62328	18.87	51.9802	0.0207921
0.62332	40.89	52.3318	0.0209327
0.62336	34.04	52.6839	0.0210736
0.6234	31.79	53.0362	0.0212145
0.62344	8.232	53.3885	0.0213554
0.62348	-1.624	53.7404	0.0214962
0.62352	7.047	54.0919	0.0216368
0.62356	17.08	54.4426	0.021777
0.6236	15.63	54.7922	0.0219169
0.62364	47.45	55.1405	0.0220562
0.62368	71.93	55.487	0.0221948
0.62372	43.06	55.8315	0.0223326
0.62376	41.44	56.1738	0.0224695
0.6238	50.51	56.5133	0.0226053
0.62384	50.11	56.8499	0.02274
0.62388	55.43	57.1832	0.0228733
0.62392	39.76	57.5128	0.0230051
0.62396	36.58	57.8384	0.0231354
0.624	78.4	58.1598	0.0232639
0.62404	82.02	58.4764	0.0233906
0.62408	86.09	58.7881	0.0235153
0.62412	114.3	59.0945	0.0236378
0.62416	95.86	59.3952	0.0237581
0.6242	92.1	59.6899	0.023876
0.62424	102.8	59.9785	0.0239914
0.62428	105.5	60.2605	0.0241042
0.62432	102.6	60.5358	0.0242143
0.62436	107.9	60.8041	0.0243216
0.6244	86.44	61.0651	0.0244261
0.62444	47.48	61.3188	0.0245275
0.62448	32.39	61.5649	0.0246259
0.62452	-23.96	61.8031	0.0247212
0.62456	-43.39	62.0333	0.0248133
0.6246	-70.18	62.2553	0.0249021
0.62464	-31.77	62.4687	0.0249875
0.62468	-21.48	62.6732	0.0250693
0.62472	20.31	62.8684	0.0251474
0.62476	42.68	63.054	0.0252216
0.6248	42.34	63.2295	0.0252918
0.62484	59.33	63.3945	0.0253578
0.62488	44.73	63.5485	0.0254194
0.62492	44.27	63.6911	0.0254765
0.62496	46.64	63.8219	0.0255288
0.625	4.041	63.9404	0.0255762
0.62504	-1.306	64.0461	0.0256184
0.62508	13.87	64.1385	0.0256554
0.62512	46.47	64.2172	0.0256869
0.62516	17.97	64.2815	0.0257126
0.6252	50.63	64.331	0.0257324
0.62524	105.3	64.3651	0.025746
0.62528	158.6	64.3832	0.0257533
0.62532	146.6	64.3848	0.0257539
0.62536	103.5	64.3694	0.0257477
0.6254	108.5	64.3364	0.0257346
0.62544	116.8	64.2856	0.0257142
0.62548	144.8	64.2163	0.0256865
0.62552	93.98	64.1281	0.0256512
0.62556	76.06	64.0208	0.0256083
0.6256	81.12	63.8938	0.0255575
0.62564	106	63.7468	0.0254987
0.62568	95.02	63.5794	0.0254318
0.62572	174.2	63.3914	0.0253566
0.62576	289.1	63.1823	0.0252729
0.6258	331.4	62.9519	0.0251808
0.62584	400.9	62.7	0.02508
0.62588	336	62.4265	0.0249706
0.62592	289.9	62.1314	0.0248526
0.62596	318.1	61.8149	0.024726
0.626	301.5	61.4772	0.0245909
0.62604	241.1	61.1187	0.0244475
0.62608	221.6	60.7397	0.0242959
0.62612	172.4	60.3408	0.0241363
0.62616	168.7	59.9225	0.023969
0.6262	100.8	59.4855	0.0237942
0.62624	107.4	59.0304	0.0236122
0.62628	96.38	58.5579	0.0234231
0.62632	94.62	58.0686	0.0232274
0.62636	65.11	57.5633	0.0230253
0.6264	-14.37	57.0427	0.0228171
0.62644	14.04	56.5074	0.022603
0.62648	-25.38	55.9583	0.0223833
0.62652	-44.66	55.396	0.0221584
0.62656	-7.606	54.8211	0.0219285
0.6266	6.7	54.2343	0.0216937
0.62664	14.68	53.6361	0.0214544
0.62668	33.14	53.0271	0.0212108
0.62672	55.86	52.4078	0.0209631
0.62676	39.94	51.7789	0.0207115
0.6268	35.23	51.1407	0.0204563
0.62684	2.654	50.494	0.0201976
0.62688	-11.85	49.8392	0.0199357
0.62692	-4.08	49.1768	0.0196707
0.62696	28.66	48.5073	0.0194029
0.627	26.99	47.8312	0.0191325
0.62704	17.62	47.1489	0.0188596
0.62708	-2.837	46.4609	0.0185844
0.62712	-13.53	45.7677	0.0183071
0.62716	17.51	45.0696	0.0180278
0.6272	76.18	44.367	0.0177468
0.62724	58.92	43.6604	0.0174642
0.62728	72.8	42.9501	0.01718
0.62732	42.16	42.2366	0.0168946
0.62736	19.62	41.5202	0.0166081
0.6274	-23.76	40.8014	0.0163206
0.62744	-37.58	40.0805	0.0160322
0.62748	-57.23	39.358	0.0157432
0.62752	-15.47	38.6342	0.0154537
0.62756	25.4	37.9094	0.0151638
0.6276	22.57	37.184	0.0148736
0.62764	69.3	36.4581	0.0145832
0.62768	37.74	35.7321	0.0142928
0.62772	37.97	35.0062	0.0140025
0.62776	10.75	34.2809	0.0137123
0.6278	3.203	33.5562	0.0134225
0.62784	0.7753	32.8327	0.0131331
0.62788	4.561	32.1104	0.0128442
0.62792	23.03	31.3897	0.0125559
0.62796	17.48	30.6708	0.0122683
0.628	28.17	29.954	0.0119816
0.62804	20.49	29.2395	0.0116958
0.62808	-2.23	28.5276	0.011411
0.62812	-19.54	27.8184	0.0111274
0.62816	0.8909	27.1123	0.0108449
0.6282	8.29	26.4093	0.0105637
0.62824	16.47	25.7098	0.0102839
0.62828	39.21	25.0138	0.0100055
0.62832	1.18	24.3217	0.00972867
0.62836	-39.11	23.6335	0.0094534
0.6284	-22.4	22.9495	0.00917978
0.62844	4.995	22.2697	0.00890788
0.62848	27.74	21.5944	0.00863776
0.62852	37.45	20.9237	0.00836947
0.62856	33.55	20.2577	0.00810307
0.6286	-5.207	19.5965	0.00783861
0.62864	33.69	18.9403	0.00757614
0.62868	21.24	18.2893	0.00731572
0.62872	21.79	17.6435	0.00705741
0.62876	13.75	17.0032	0.00680127
0.6288	0.2261	16.3684	0.00654734
0.62884	-27.49	15.7392	0.0062957
0.62888	-3.733	15.1159	0.00604638
0.62892	-21.59	14.4986	0.00579944
0.62896	-2.548	13.8873	0.00555492
0.629	15.63	13.2822	0.00531287
0.62904	14.04	12.6833	0.00507331
0.62908	4.706	12.0907	0.00483629
0.62912	1.989	11.5046	0.00460184
0.62916	4.764	10.925	0.00436999
0.6292	12.94	10.352	0.00414079
0.62924	-21.1	9.78565	0.00391426
0.62928	-12.23	9.22609	0.00369043
0.62932	-19.72	8.67336	0.00346934
0.62936	-36.54	8.12753	0.00325101
0.6294	-77.4	7.58864	0.00303545
0.62944	-58.15	7.05672	0.00282269
0.62948	-39.69	6.53177	0.00261271
0.62952	-25.9	6.01377	0.00240551
0.62956	19.36	5.50268	0.00220107
0.6296	7.712	4.99844	0.00199938
0.62964	36.32	4.50101	0.0018004
0.62968	29.73	4.01034	0.00160413
0.62972	14.73	3.52638	0.00141055
0.62976	-4.745	3.04911	0.00121964
0.6298	0.9776	2.5785	0.0010314
0.62984	-1.913	2.11452	0.000845808
0.62988	0.544	1.65715	0.000662859
0.62992	7.249	1.20635	0.00048254
0.62996	-20.61	0.762103	0.000304841
0.63	-11.45	0.32437	0.000129748
0.63004	-23.21	-0.106881	-4.27523e-05
0.63008	-17.84	-0.531692	-0.000212677
0.63012	-36.39	-0.950114	-0.000380046
0.63016	-67.86	-1.36221	-0.000544883
0.6302	-79.54	-1.76805	-0.000707218
0.63024	-67.69	-2.16773	-0.000867092
0.63028	-46.3	-2.56139	-0.00102455
0.63032	-24.31	-2.94916	-0.00117967
0.63036	26.73	-3.33123	-0.00133249
0.6304	15.08	-3.70776	-0.0014831
0.63044	59.73	-4.07892	-0.00163157
0.63048	52.94	-4.44486	-0.00177795
0.63052	26.73	-4.80573	-0.00192229
0.63056	41.44	-5.16163	-0.00206465
0.6306	10.02	-5.51266	-0.00220506
0.63064	-27.72	-5.85892	-0.00234357
0.63068	-38.65	-6.20048	-0.00248019
0.63072	-78.56	-6.53743	-0.00261497
0.63076	-106.6	-6.86988	-0.00274795
0.6308	-94.11	-7.19795	-0.00287918
0.63084	-56.25	-7.52181	-0.00300873
0.63088	-36.07	-7.84166	-0.00313666
0.63092	19.24	-8.1577	-0.00326308
0.63096	85.46	-8.47015	-0.00338806
0.631	89.13	-8.77924	-0.0035117
0.63104	92.39	-9.08513	-0.00363405
0.63108	52.31	-9.38796	-0.00375519
0.63112	-8.097	-9.68786	-0.00387514
0.63116	-35.24	-9.98491	-0.00399396
0.6312	-72.08	-10.2792	-0.00411167
0.63124	-90.78	-10.5708	-0.00422831
0.63128	-79.83	-10.8598	-0.00434393
0.63132	-55.7	-11.1465	-0.00445858
0.63136	-10.9	-11.4308	-0.00457234
0.6314	23.69	-11.7132	-0.00468526
0.63144	28.55	-11.9936	-0.00479744
0.63148	47.1	-12.2723	-0.00490892
0.63152	59.59	-12.5495	-0.00501979
0.63156	64.01	-12.8252	-0.00513009
0.6316	33.61	-13.0996	-0.00523986
0.63164	30.08	-13.3728	-0.00534913
0.63168	-23.39	-13.6448	-0.00545794
0.63172	-71.48	-13.9157	-0.0055663
0.63176	-99.05	-14.1856	-0.00567422
0.6318	-88.33	-14.4544	-0.00578175
0.63184	-78.27	-14.7223	-0.00588891
0.63188	-44.17	-14.9894	-0.00599577
0.63192	4.561	-15.2559	-0.00610237
0.63196	24.47	-15.522	-0.00620879
0.632	72.97	-15.7877	-0.00631509
0.63204	79.18	-16.0533	-0.00642131
0.63208	63.26	-16.3188	-0.0065275
0.63212	16.24	-16.5842	-0.0066337
0.63216	-42.55	-16.8498	-0.00673991
0.6322	-51.65	-17.1154	-0.00684616
0.63224	-44.46	-17.3811	-0.00695245
0.63228	-38.47	-17.647	-0.00705882
0.63232	-24.14	-17.9132	-0.00716527
0.63236	23.52	-18.1796	-0.00727184
0.6324	51.03	-18.4464	-0.00737856
0.63244	39.47	-18.7136	-0.00748543
0.63248	39.1	-18.9812	-0.00759248
0.63252	-7.606	-19.2493	-0.00769971
0.63256	-15.93	-19.5177	-0.0078071
0.6326	-16.85	-19.7866	-0.00791465
0.63264	-10.44	-20.0559	-0.00802236
0.63268	-12.55	-20.3255	-0.0081302
0.63272	10.05	-20.5954	-0.00823817
0.63276	-37.52	-20.8656	-0.00834624
0.6328	-36.16	-21.136	-0.00845442
0.63284	-48.04	-21.4067	-0.00856267
0.63288	-23.53	-21.6775	-0.008671
0.63292	-1.941	-21.9484	-0.00877937
0.63296	23.93	-22.2195	-0.0088878
0.633	67.33	-22.4906	-0.00899625
0.63304	65.34	-22.7618	-0.00910471
0.63308	100.6	-23.0329	-0.00921315
0.63312	75.66	-23.3038	-0.00932151
0.63316	18.06	-23.5743	-0.00942972
0.6332	-6.334	-23.8443	-0.00953772
0.63324	-7.866	-24.1135	-0.0096454
0.63328	-47.58	-24.3817	-0.00975269
0.63332	-35.58	-24.6487	-0.00985948
0.63336	-20.35	-24.9142	-0.00996568
0.6334	-48.5	-25.178	-0.0100712
0.63344	-32.03	-25.4399	-0.010176
0.63348	-70.73	-25.6996	-0.0102799
0.63352	-106.9	-25.957	-0.0103828
0.63356	-100.4	-26.2119	-0.0104848
0.6336	-89.05	-26.4641	-0.0105856
0.63364	-98.62	-26.7134	-0.0106854
0.63368	-98.85	-26.9598	-0.0107839
0.63372	-81.97	-27.2031	-0.0108812
0.63376	-58.59	-27.4434	-0.0109773
0.6338	-55.5	-27.6805	-0.0110722
0.63384	-79.45	-27.9145	-0.0111658
0.63388	-66.3	-28.1453	-0.0112581
0.63392	-13.59	-28.373	-0.0113492
0.63396	-17.98	-28.5976	-0.0114391
0.634	-57	-28.8191	-0.0115277
0.63404	-24.89	-29.0376	-0.011615
0.63408	-46.19	-29.253	-0.0117012
0.63412	-36.59	-29.4653	-0.0117861
0.63416	9.59	-29.6747	-0.0118699
0.6342	101.2	-29.8812	-0.0119525
0.63424	143	-30.0847	-0.0120339
0.63428	151.1	-30.2852	-0.0121141
0.63432	153.7	-30.4826	-0.0121931
0.63436	85.8	-30.6768	-0.0122707
0.6344	-29.92	-30.8675	-0.012347
0.63444	-99.43	-31.0544	-0.0124218
0.63448	-126.8	-31.2373	-0.0124949
0.63452	-145.7	-31.4158	-0.0125663
0.63456	-156.7	-31.5899	-0.0126359
0.6346	-106.9	-31.7592	-0.0127037
0.63464	-107.1	-31.9237	-0.0127695
0.63468	-74.51	-32.0833	-0.0128333
0.63472	-29.63	-32.2378	-0.0128951
0.63476	13.29	-32.3872	-0.0129549
0.6348	47.74	-32.5315	-0.0130126
0.63484	70.22	-32.6706	-0.0130682
0.63488	89.56	-32.8043	-0.0131217
0.63492	74.24	-32.9325	-0.013173
0.63496	1.845	-33.0551	-0.013222
0.635	-108.1	-33.1717	-0.0132687
0.63504	-183.5	-33.2822	-0.0133129
0.63508	-190.1	-33.3864	-0.0133545
0.63512	-216.9	-33.484	-0.0133936
0.63516	-203.3	-33.575	-0.01343
0.6352	-25.47	-33.6594	-0.0134638
0.63524	17.54	-33.7372	-0.0134949
0.63528	41.79	-33.8083	-0.0135233
0.63532	58.81	-33.8729	-0.0135492
0.63536	85.98	-33.9309	-0.0135724
0.6354	62.57	-33.9822	-0.0135929
0.63544	6.584	-34.0268	-0.0136107
0.63548	-66.02	-34.0645	-0.0136258
0.63552	-134.3	-34.0952	-0.0136381
0.63556	-155.7	-34.1187	-0.0136475
0.6356	-157.8	-34.135	-0.013654
0.63564	-148.8	-34.144	-0.0136576
0.63568	-90.9	-34.1457	-0.0136583
0.63572	-6.045	-34.1402	-0.0136561
0.63576	-17.78	-34.1274	-0.013651
0.6358	-2.259	-34.1075	-0.013643
0.63584	13.67	-34.0805	-0.0136322
0.63588	45.77	-34.0464	-0.0136186
0.63592	35.17	-34.0053	-0.0136021
0.63596	-21.57	-33.9571	-0.0135828
0.636	-101.1	-33.9017	-0.0135607
0.63604	-137.1	-33.8393	-0.0135357
0.63608	-151	-33.7696	-0.0135079
0.63612	-135.7	-33.6929	-0.0134772
0.63616	-109.5	-33.6091	-0.0134436
0.6362	-79.02	-33.5183	-0.0134073
0.63624	-1.537	-33.4207	-0.0133683
0.63628	26.41	-33.3164	-0.0133266
0.63632	57.83	-33.2055	-0.0132822
0.63636	48.49	-33.0882	-0.0132353
0.6364	9.128	-32.9646	-0.0131858
0.63644	-23.1	-32.8347	-0.0131339
0.63648	-85.18	-32.6985	-0.0130794
0.63652	-84.69	-32.5561	-0.0130224
0.63656	-119.8	-32.4076	-0.012963
0.6366	-137.6	-32.2529	-0.0129012
0.63664	-111.8	-32.0923	-0.0128369
0.63668	-83.88	-31.9259	-0.0127704
0.63672	-48.99	-31.7538	-0.0127015
0.63676	2.22	-31.5763	-0.0126305
0.6368	43.43	-31.3935	-0.0125574
0.63684	69.5	-31.2057	-0.0124823
0.63688	78.81	-31.0129	-0.0124052
0.63692	51.76	-30.8154	-0.0123261
0.63696	-24.31	-30.6131	-0.0122452
0.637	-52.2	-30.4062	-0.0121625
0.63704	-115.6	-30.1948	-0.0120779
0.63708	-122.4	-29.9788	-0.0119915
0.63712	-95.58	-29.7584	-0.0119033
0.63716	-103.2	-29.5336	-0.0118135
0.6372	-70.76	-29.3047	-0.0117219
0.63724	20.34	-29.0719	-0.0116288
0.63728	55.11	-28.8352	-0.0115341
0.63732	55.43	-28.5949	-0.011438
0.63736	69.59	-28.3511	-0.0113405
0.6374	-5.554	-28.104	-0.0112416
0.63744	-7.693	-27.8535	-0.0111414
0.63748	-9.311	-27.5998	-0.0110399
0.63752	-57.26	-27.343	-0.0109372
0.63756	-61.59	-27.083	-0.0108332
0.6376	-86.16	-26.82	-0.010728
0.63764	-78.21	-26.5539	-0.0106216
0.63768	-78.27	-26.285	-0.010514
0.63772	-32.03	-26.0134	-0.0104054
0.63776	19.24	-25.7391	-0.0102956
0.6378	-1.161	-25.4623	-0.0101849
0.63784	0.05273	-25.1831	-0.0100732
0.63788	-32.52	-24.9016	-0.00996065
0.63792	-4.745	-24.618	-0.0098472
0.63796	2.163	-24.3323	-0.00973293
0.638	-43.27	-24.0447	-0.00961788
0.63804	-53.99	-23.7552	-0.00950207
0.63808	-80.23	-23.4639	-0.00938556
0.63812	-51.54	-23.171	-0.00926839
0.63816	-80.23	-22.8765	-0.00915061
0.6382	-12.37	-22.5807	-0.00903227
0.63824	6.555	-22.2836	-0.00891343
0.63828	28	-21.9854	-0.00879417
0.63832	23.29	-21.6863	-0.00867453
0.63836	42.45	-21.3864	-0.00855456
0.6384	-62.46	-21.0858	-0.00843432
0.63844	-1.797	-20.7846	-0.00831384
0.63848	-27.84	-20.4829	-0.00819316
0.63852	-46.88	-20.1808	-0.00807231
0.63856	-29.74	-19.8784	-0.00795135
0.6386	-50.03	-19.5758	-0.0078303
0.63864	-25.93	-19.2731	-0.00770922
0.63868	-49.8	-18.9704	-0.00758816
0.63872	-45.12	-18.6679	-0.00746716
0.63876	-28.62	-18.3657	-0.00734628
0.6388	7.509	-18.0639	-0.00722557
0.63884	26.06	-17.7628	-0.00710511
0.63888	40.31	-17.4624	-0.00698494
0.63892	46.03	-17.1628	-0.00686511
0.63896	9.966	-16.8642	-0.00674567
0.639	13.98	-16.5666	-0.00662664
0.63904	-30.52	-16.2701	-0.00650806
0.63908	-60	-15.9748	-0.00638994
0.63912	-53.04	-15.6808	-0.00627232
0.63916	-49.34	-15.388	-0.00615522
0.6392	2.48	-15.0967	-0.00603868
0.63924	11.73	-14.8069	-0.00592275
0.63928	19.19	-14.5186	-0.00580745
0.63932	46.58	-14.2321	-0.00569283
0.63936	18.78	-13.9473	-0.0055789
0.6394	9.041	-13.6643	-0.0054657
0.63944	-9.514	-13.3831	-0.00535325
0.63948	3.434	-13.1038	-0.00524154
0.63952	-19.51	-12.8265	-0.0051306
0.63956	-21.13	-12.5511	-0.00502042
0.6396	-44.11	-12.2776	-0.00491103
0.63964	-70.18	-12.0061	-0.00480244
0.63968	-22.61	-11.7366	-0.00469465
0.63972	-28.65	-11.4693	-0.0045877
0.63976	-17.98	-11.204	-0.00448161
0.6398	-3.791	-10.941	-0.00437641
0.63984	40.92	-10.6803	-0.00427213
0.63988	20.05	-10.422	-0.00416879
0.63992	-14.37	-10.166	-0.00406642
0.63996	1.382	-9.91258	-0.00396503
0.64	-17.84	-9.66161	-0.00386465
0.64004	-39.63	-9.4132	-0.00376528
0.64008	-30.76	-9.16737	-0.00366695
0.64012	-6.334	-8.92419	-0.00356968
0.64016	-21.07	-8.68371	-0.00347348
0.6402	14.91	-8.44599	-0.0033784
0.64024	39.79	-8.21109	-0.00328444
0.64028	51.61	-7.97907	-0.00319163
0.64032	15.51	-7.74995	-0.00309998
0.64036	-7.317	-7.52377	-0.00300951
0.6404	10.2	-7.30052	-0.00292021
0.64044	8.521	-7.08021	-0.00283208
0.64048	18.46	-6.86283	-0.00274513
0.64052	-17.92	-6.64838	-0.00265935
0.64056	10.92	-6.43685	-0.00257474
0.6406	-25.58	-6.2282	-0.00249128
0.64064	-12.92	-6.02244	-0.00240897
0.64068	0.7175	-5.81953	-0.00232781
0.64072	-7.346	-5.61947	-0.00224779
0.64076	14.99	-5.42225	-0.0021689
0.6408	32.08	-5.22785	-0.00209114
0.64084	44.94	-5.03623	-0.00201449
0.64088	25.54	-4.84738	-0.00193895
0.64092	18.75	-4.66122	-0.00186449
0.64096	-11.36	-4.47771	-0.00179108
0.641	0.2261	-4.29675	-0.0017187
0.64104	-17	-4.11828	-0.00164731
0.64108	-4.86	-3.94223	-0.00157689
0.64112	-10.18	-3.76852	-0.00150741
0.64116	-7.028	-3.59707	-0.00143883
0.6412	4.388	-3.42783	-0.00137113
0.64124	-2.982	-3.26071	-0.00130429
0.64128	7.336	-3.09566	-0.00123827
0.64132	4.157	-2.9326	-0.00117304
0.64136	1.7	-2.77146	-0.00110858
0.6414	23.75	-2.61215	-0.00104486
0.64144	-2.751	-2.4546	-0.000981841
0.64148	5.775	-2.29872	-0.00091949
0.64152	11.06	-2.14442	-0.00085777
0.64156	-5.583	-1.99161	-0.000796645
0.6416	-20.81	-1.84019	-0.000736076
0.64164	-0.4386	-1.69007	-0.000676026
0.64168	24.42	-1.54115	-0.000616458
0.64172	18.32	-1.39334	-0.000557334
0.64176	20.05	-1.24654	-0.000498615
0.6418	3.261	-1.10064	-0.000440257
0.64184	4.648	-0.955536	-0.000382214
0.64188	8.318	-0.811102	-0.000324441
0.64192	-5.988	-0.66722	-0.000266888
0.64196	-15	-0.523767	-0.000209507
0.642	-7.577	-0.380623	-0.000152249
0.64204	-13.91	-0.237672	-9.50689e-05
0.64208	2.538	-0.094801	-3.79204e-05
0.64212	-11.51	0.0481	1.924e-05
0.64216	-24.83	0.191138	7.6455e-05
0.6422	-33.7	0.334413	0.000133765
0.64224	-2.635	0.47802	0.000191208
0.64228	-83.38	0.622042	0.000248817
0.64232	-1.595	0.766547	0.000306619
0.64236	3.925	0.911593	0.000364637
0.6424	-7.548	1.05723	0.000422891
0.64244	-2.259	1.20349	0.000481398
0.64248	0.7464	1.35044	0.000540175
0.64252	-7.288	1.4981	0.000599239
0.64256	-4.774	1.64651	0.000658606
0.6426	-18.27	1.79573	0.000718291
0.64264	-9.138	1.94577	0.000778306
0.64268	19.36	2.09666	0.000838665
0.64272	31.32	2.24844	0.000899377
0.64276	14.99	2.40114	0.000960455
0.6428	30.02	2.55479	0.00102192
0.64284	30.98	2.70944	0.00108378
0.64288	0.8331	2.86515	0.00114606
0.64292	-4.282	3.02199	0.00120879
0.64296	-11.05	3.18001	0.001272
0.643	-43.41	3.33928	0.00133571
0.64304	-38.04	3.49986	0.00139994
0.64308	-50.29	3.66178	0.00146471
0.64312	-31.57	3.82507	0.00153003
0.64316	-15.41	3.98974	0.00159589
0.6432	-6.855	4.15576	0.00166231
0.64324	28.09	4.32314	0.00172925
0.64328	30.57	4.49184	0.00179673
0.64332	19.16	4.66185	0.00186474
0.64336	13.26	4.83317	0.00193327
0.6434	18	5.0058	0.00200232
0.64344	13.2	5.17974	0.0020719
0.64348	-1.739	5.35501	0.002142
0.64352	10.95	5.53161	0.00221264
0.64356	-1.306	5.70955	0.00228382
0.6436	-18.44	5.88885	0.00235554
0.64364	-19.48	6.06951	0.00242781
0.64368	-26.8	6.25154	0.00250062
0.64372	-21.62	6.43491	0.00257397
0.64376	-19.98	6.61962	0.00264785
0.6438	-4.543	6.80562	0.00272225
0.64384	-1.277	6.99287	0.00279715
0.64388	-20.78	7.18132	0.00287253
0.64392	-17.49	7.37092	0.00294837
0.64396	-16.59	7.5616	0.00302464
0.644	-12.81	7.75329	0.00310132
0.64404	1.584	7.94591	0.00317836
0.64408	0.9776	8.13936	0.00325574
0.64412	-8.011	8.33356	0.00333342
0.64416	-2.115	8.5284	0.00341136
0.6442	-6.652	8.72378	0.00348951
0.64424	-23.04	8.91959	0.00356784
0.64428	-15.67	9.11572	0.00364629
0.64432	-6.768	9.31203	0.00372481
0.64436	-3.184	9.5084	0.00380336
0.6444	12.83	9.70468	0.00388187
0.64444	-4.571	9.90073	0.00396029
0.64448	15.46	10.0964	0.00403855
0.64452	14.62	10.2915	0.00411661
0.64456	7.885	10.486	0.00419438
0.6446	40.49	10.6796	0.00427183
0.64464	24.47	10.8722	0.00434888
0.64468	4.07	11.0637	0.00442548
0.64472	-9.167	11.254	0.00450159
0.64476	-17.52	11.4428	0.00457713
0.6448	-34.69	11.6301	0.00465206
0.64484	-18.5	11.8158	0.00472631
0.64488	-32.78	11.9995	0.00479981
0.64492	-43.47	12.1812	0.00487249
0.64496	-29.31	12.3607	0.00494426
0.645	-7.982	12.5376	0.00501504
0.64504	41.7	12.7118	0.00508473
0.64508	65.17	12.8831	0.00515324
0.64512	28.2	13.0512	0.00522046
0.64516	14.62	13.2158	0.00528631
0.6452	57.54	13.3768	0.00535071
0.64524	86	13.5339	0.00541357
0.64528	49.62	13.6871	0.00547482
0.64532	0.6308	13.836	0.00553439
0.64536	-11.05	13.9805	0.00559221
0.6454	26.06	14.1205	0.00564822
0.64544	71.61	14.2559	0.00570236
0.64548	24.65	14.3864	0.00575456
0.64552	36.09	14.5119	0.00580478
0.64556	87.48	14.6324	0.00585295
0.6456	34.53	14.7476	0.00589902
0.64564	28.55	14.8574	0.00594297
0.64568	12.62	14.9618	0.00598474
0.64572	19.73	15.0608	0.00602431
0.64576	20.34	15.1541	0.00606163
0.6458	-13.65	15.2417	0.00609669
0.64584	-6.045	15.3236	0.00612945
0.64588	28.26	15.3996	0.00615986
0.64592	24.01	15.4697	0.00618789
0.64596	175.3	15.5338	0.00621351
0.646	44.21	15.5917	0.00623668
0.64604	30.83	15.6435	0.00625739
0.64608	54.94	15.6891	0.00627563
0.64612	38.58	15.7285	0.0062914
0.64616	19.71	15.7617	0.00630469
0.6462	27.62	15.7888	0.00631551
0.64624	43.06	15.8097	0.00632388
0.64628	20.46	15.8245	0.00632979
0.64632	9.764	15.8331	0.00633326
0.64636	8.925	15.8357	0.0063343
0.6464	23.49	15.8323	0.00633292
0.64644	-1.884	15.8228	0.00632914
0.64648	-12.4	15.8074	0.00632297
0.64652	14.5	15.786	0.00631441
0.64656	36.03	15.7587	0.00630347
0.6466	20.11	15.7254	0.00629016
0.64664	50.23	15.6862	0.00627449
0.64668	-19.66	15.6412	0.00625647
0.64672	125	15.5903	0.0062361
0.64676	119.4	15.5335	0.00621341
0.6468	-27.95	15.4711	0.00618842
0.64684	29.36	15.4029	0.00616117
0.64688	-21.36	15.3292	0.00613169
0.64692	-2.722	15.25	0.00610001
0.64696	-0.6987	15.1655	0.00606618
0.647	3.521	15.0756	0.00603022
0.64704	-12.69	14.9804	0.00599216
0.64708	17.02	14.88	0.00595202
0.64712	64.62	14.7746	0.00590982
0.64716	150.4	14.664	0.0058656
0.6472	2.394	14.5484	0.00581938
0.64724	-1.71	14.428	0.0057712
0.64728	-7.722	14.3028	0.00572112
0.64732	12.68	14.1729	0.00566918
0.64736	-5.67	14.0385	0.00561541
0.6474	3.492	13.8997	0.00555988
0.64744	4.475	13.7565	0.0055026
0.64748	-10.18	13.6091	0.00544362
0.64752	35.08	13.4575	0.00538298
0.64756	4.677	13.3018	0.00532072
0.6476	19.1	13.1421	0.00525685
0.64764	-5.67	12.9786	0.00519143
0.64768	102.9	12.8112	0.00512448
0.64772	92.85	12.6401	0.00505604
0.64776	-9.86	12.4654	0.00498616
0.6478	25.8	12.2872	0.0049149
0.64784	-6.334	12.1057	0.0048423
0.64788	27.28	11.9211	0.00476843
0.64792	10.37	11.7334	0.00469334
0.64796	16.56	11.5427	0.00461709
0.648	8.665	11.3494	0.00453974
0.64804	9.417	11.1534	0.00446135
0.64808	34.47	10.9549	0.00438196
0.64812	-12	10.7541	0.00430165
0.64816	10.8	10.5512	0.00422047
0.6482	32.6	10.3462	0.00413847
0.64824	8.694	10.1393	0.00405573
0.64828	3.694	9.93072	0.00397229
0.64832	-12.61	9.72054	0.00388822
0.64836	-3.878	9.50893	0.00380357
0.6484	-14.63	9.29603	0.00371841
0.64844	-14.72	9.08197	0.00363279
0.64848	-18.3	8.86687	0.00354675
0.64852	-43.41	8.65086	0.00346034
0.64856	3.868	8.43404	0.00337361
0.6486	12.19	8.21649	0.0032866
0.64864	-7.317	7.99831	0.00319932
0.64868	-1.97	7.77957	0.00311183
0.64872	8.521	7.56035	0.00302414
0.64876	0.4284	7.34073	0.00293629
0.6488	-5.67	7.12079	0.00284832
0.64884	-8.386	6.9006	0.00276024
0.64888	-7.49	6.68021	0.00267208
0.64892	-12.37	6.4597	0.00258388
0.64896	6.353	6.23911	0.00249564
0.649	-11.85	6.0185	0.0024074
0.64904	-8.56	5.79792	0.00231917
0.64908	19.36	5.5774	0.00223096
0.64912	35.66	5.35698	0.00214279
0.64916	32.19	5.13671	0.00205468
0.6492	19.76	4.91665	0.00196666
0.64924	-24.86	4.69684	0.00187874
0.64928	-27.58	4.47736	0.00179094
0.64932	-35	4.25825	0.0017033
0.64936	-39.17	4.03957	0.00161583
0.6494	-12.87	3.82134	0.00152854
0.64944	-14.69	3.60358	0.00144143
0.64948	-17.06	3.38629	0.00135452
0.64952	-3.56	3.16947	0.00126779
0.64956	-13.5	2.95311	0.00118124
0.6496	18.17	2.7372	0.00109488
0.64964	21.44	2.52173	0.00100869
0.64968	33.32	2.30668	0.00092267
0.64972	48.26	2.09204	0.000836816
0.64976	50.02	1.87783	0.000751133
0.6498	-5.728	1.66408	0.000665631
0.64984	-47.75	1.45081	0.000580324
0.64988	-55.99	1.23806	0.000495225
0.64992	-28.62	1.02585	0.000410342
0.64996	-10.55	0.814189	0.000325676
0.65	-36.94	0.603058	0.000241223
0.65004	22.1	0.392439	0.000156976
0.65008	7.683	0.182309	7.29237e-05
0.65012	20.17	-0.027356	-1.09424e-05
0.65016	27.65	-0.236576	-9.46305e-05
0.6502	6.411	-0.445363	-0.000178145
0.65024	14.21	-0.653721	-0.000261489
0.65028	19.53	-0.861649	-0.00034466
0.65032	13.06	-1.06914	-0.000427655
0.65036	34.36	-1.27617	-0.00051047
0.6504	21.27	-1.48273	-0.000593094
0.65044	-23.01	-1.68878	-0.000675514
0.65048	-21.54	-1.89429	-0.000757716
0.65052	-10.06	-2.09921	-0.000839685
0.65056	-8.415	-2.30353	-0.00092141
0.6506	2.076	-2.5072	-0.00100288
0.65064	-10.18	-2.71022	-0.00108409
0.65068	2.047	-2.91256	-0.00116502
0.65072	16.67	-3.11419	-0.00124568
0.65076	9.59	-3.31509	-0.00132604
0.6508	-4.109	-3.51523	-0.00140609
0.65084	-12.2	-3.71458	-0.00148583
0.65088	21.15	-3.9131	-0.00156524
0.65092	1.353	-4.11076	-0.0016443
0.65096	-0.2074	-4.30751	-0.001723
0.651	-6.999	-4.50331	-0.00180133
0.65104	-50.24	-4.69812	-0.00187925
0.65108	-49.72	-4.8919	-0.00195676
0.65112	-54.43	-5.08462	-0.00203385
0.65116	-13.3	-5.27628	-0.00211051
0.6512	-7.808	-5.46688	-0.00218675
0.65124	41.73	-5.65642	-0.00226257
0.65128	9.908	-5.84492	-0.00233797
0.65132	27.42	-6.03237	-0.00241295
0.65136	44.91	-6.21877	-0.00248751
0.6514	-8.733	-6.40409	-0.00256164
0.65144	-12.32	-6.58829	-0.00263532
0.65148	-29.92	-6.77133	-0.00270853
0.65152	-45.03	-6.95317	-0.00278127
0.65156	-24.66	-7.13378	-0.00285351
0.6516	-74.37	-7.31315	-0.00292526
0.65164	-70.44	-7.49127	-0.00299651
0.65168	-63.85	-7.66815	-0.00306726
0.65172	-69.95	-7.84386	-0.00313754
0.65176	-31.13	-8.01843	-0.00320737
0.6518	14.5	-8.19197	-0.00327679
0.65184	23.78	-8.36455	-0.00334582
0.65188	15.37	-8.53627	-0.00341451
0.65192	48.98	-8.7072	-0.00348288
0.65196	17.97	-8.87741	-0.00355096
0.652	-43.01	-9.04695	-0.00361878
0.65204	-53.07	-9.21586	-0.00368634
0.65208	-31.25	-9.38418	-0.00375367
0.65212	-30.15	-9.55199	-0.0038208
0.65216	-0.901	-9.71935	-0.00388774
0.6522	28.32	-9.88634	-0.00395454
0.65224	-7.375	-10.053	-0.00402122
0.65228	32.42	-10.2195	-0.0040878
0.65232	51.5	-10.3858	-0.00415432
0.65236	-6.566	-10.552	-0.00422078
0.6524	5.082	-10.718	-0.0042872
0.65244	-8.068	-10.884	-0.00435359
0.65248	-49.11	-11.0499	-0.00441995
0.65252	-70.55	-11.2157	-0.00448629
0.65256	-56.07	-11.3816	-0.00455263
0.6526	-68.18	-11.5474	-0.00461897
0.65264	-39.89	-11.7134	-0.00468535
0.65268	-1.739	-11.8795	-0.0047518
0.65272	0.1972	-12.0459	-0.00481836
0.65276	24.21	-12.2127	-0.00488508
0.6528	52.05	-12.3799	-0.00495197
0.65284	24.53	-12.5477	-0.00501908
0.65288	0.2261	-12.7161	-0.00508642
0.65292	-29.34	-12.8851	-0.00515402
0.65296	-86.51	-13.0547	-0.00522189
0.653	-71.02	-13.2251	-0.00529004
0.65304	-42.2	-13.3963	-0.00535851
0.65308	-40.64	-13.5683	-0.00542733
0.65312	-8.762	-13.7413	-0.00549654
0.65316	15.6	-13.9154	-0.00556618
0.6532	37.42	-14.0907	-0.0056363
0.65324	45.89	-14.2673	-0.00570693
0.65328	67.54	-14.4453	-0.0057781
0.65332	5.949	-14.6246	-0.00584984
0.65336	14.99	-14.8054	-0.00592216
0.6534	15.17	-14.9877	-0.00599507
0.65344	-30.18	-15.1714	-0.00606856
0.65348	-39.22	-15.3566	-0.00614263
0.65352	-39.28	-15.5432	-0.00621729
0.65356	-53.04	-15.7313	-0.00629254
0.6536	-42.14	-15.9209	-0.00636838
0.65364	11.82	-16.1121	-0.00644482
0.65368	31.93	-16.3047	-0.00652189
0.65372	11.38	-16.4989	-0.00659958
0.65376	46.03	-16.6948	-0.0066779
0.6538	48.84	-16.8921	-0.00675686
0.65384	22.54	-17.0911	-0.00683643
0.65388	14.21	-17.2915	-0.00691661
0.65392	-0.1496	-17.4934	-0.00699736
0.65396	-25.61	-17.6966	-0.00707865
0.654	-22.63	-17.9011	-0.00716046
0.65404	-31.13	-18.1069	-0.00724274
0.65408	-30.38	-18.3137	-0.00732547
0.65412	1.902	-18.5215	-0.00740861
0.65416	-10.87	-18.7303	-0.00749213
0.6542	-4.629	-18.94	-0.00757601
0.65424	3.03	-19.1505	-0.0076602
0.65428	25.95	-19.3617	-0.00774468
0.65432	4.128	-19.5735	-0.00782939
0.65436	3.723	-19.7857	-0.0079143
0.6544	4.85	-19.9984	-0.00799935
0.65444	7.162	-20.2112	-0.0080845
0.65448	2.654	-20.4242	-0.00816968
0.65452	-21.77	-20.6371	-0.00825483
0.65456	-13.99	-20.8497	-0.00833988
0.6546	0.3706	-21.0619	-0.00842478
0.65464	25.69	-21.2736	-0.00850945
0.65468	9.821	-21.4845	-0.00859382
0.65472	14.42	-21.6945	-0.00867781
0.65476	-2.375	-21.9034	-0.00876134
0.6548	-12.06	-22.1108	-0.00884433
0.65484	-12.03	-22.3167	-0.00892667
0.65488	-12.2	-22.5207	-0.00900829
0.65492	-12.78	-22.7227	-0.00908908
0.65496	1.238	-22.9224	-0.00916894
0.655	-9.311	-23.1195	-0.00924779
0.65504	-54.8	-23.3138	-0.00932551
0.65508	-34.11	-23.505	-0.00940201
0.65512	-17.84	-23.6929	-0.00947718
0.65516	-38.53	-23.8773	-0.00955093
0.6552	-75.03	-24.0579	-0.00962315
0.65524	-47.2	-24.2344	-0.00969377
0.65528	-8.04	-24.4067	-0.00976267
0.65532	-32.58	-24.5745	-0.00982979
0.65536	-81.85	-24.7376	-0.00989503
0.6554	-56.97	-24.8958	-0.00995831
0.65544	-20.09	-25.0489	-0.0100196
0.65548	7.509	-25.1967	-0.0100787
0.65552	-30.12	-25.3391	-0.0101356
0.65556	-50.67	-25.4758	-0.0101903
0.6556	-53.91	-25.6067	-0.0102427
0.65564	-19.86	-25.7316	-0.0102926
0.65568	-47.63	-25.8502	-0.0103401
0.65572	-58.47	-25.9625	-0.010385
0.65576	-87.23	-26.0683	-0.0104273
0.6558	-55.64	-26.1674	-0.010467
0.65584	-32.06	-26.2597	-0.0105039
0.65588	-64.34	-26.3451	-0.010538
0.65592	-76.82	-26.4234	-0.0105694
0.65596	-69.86	-26.4947	-0.0105979
0.656	-20.5	-26.5587	-0.0106235
0.65604	-46.56	-26.6154	-0.0106462
0.65608	-52.75	-26.6649	-0.0106659
0.65612	-50.96	-26.7069	-0.0106828
0.65616	6.931	-26.7415	-0.0106966
0.6562	-45.84	-26.7686	-0.0107075
0.65624	-33.96	-26.7883	-0.0107153
0.65628	-1.97	-26.8003	-0.0107201
0.65632	2.105	-26.8048	-0.0107219
0.65636	-31.94	-26.8016	-0.0107207
0.6564	-74.89	-26.7908	-0.0107163
0.65644	-85.38	-26.7722	-0.0107089
0.65648	-33.01	-26.7458	-0.0106983
0.65652	-23.96	-26.7116	-0.0106846
0.65656	-26.05	-26.6695	-0.0106678
0.6566	-18.56	-26.6197	-0.0106479
0.65664	-34.66	-26.562	-0.0106248
0.65668	18.46	-26.4964	-0.0105986
0.65672	-0.005073	-26.423	-0.0105692
0.65676	-29.51	-26.3417	-0.0105367
0.6568	-32.35	-26.2524	-0.010501
0.65684	-64.8	-26.1551	-0.010462
0.65688	-48.36	-26.0498	-0.0104199
0.65692	-60.06	-25.9365	-0.0103746
0.65696	-25.93	-25.8151	-0.0103261
0.657	-34.83	-25.6857	-0.0102743
0.65704	-42.75	-25.5482	-0.0102193
0.65708	-37.89	-25.4027	-0.0101611
0.65712	-32.61	-25.2491	-0.0100996
0.65716	-26.94	-25.0875	-0.010035
0.6572	-20.09	-24.9178	-0.00996714
0.65724	6.093	-24.7402	-0.0098961
0.65728	4.475	-24.5547	-0.00982186
0.65732	-44.98	-24.3611	-0.00974444
0.65736	-37.29	-24.1596	-0.00966383
0.6574	-75.09	-23.9501	-0.00958003
0.65744	-65.47	-23.7326	-0.00949305
0.65748	-52.66	-23.5072	-0.00940289
0.65752	-28.44	-23.274	-0.00930959
0.65756	-25.35	-23.0329	-0.00921314
0.6576	-43.93	-22.784	-0.00911359
0.65764	-29.48	-22.5274	-0.00901095
0.65768	-17.55	-22.2631	-0.00890525
0.65772	-32.26	-21.9913	-0.00879652
0.65776	-27.32	-21.7119	-0.00868478
0.6578	-39.89	-21.4252	-0.00857006
0.65784	-19.92	-21.131	-0.0084524
0.65788	-77.72	-20.8296	-0.00833183
0.65792	-120.1	-20.5209	-0.00820837
0.65796	-59.86	-20.2052	-0.00808208
0.658	-34.72	-19.8825	-0.00795302
0.65804	-38.33	-19.5531	-0.00782123
0.65808	-44.63	-19.217	-0.0076868
0.65812	11.73	-18.8745	-0.00754978
0.65816	20.98	-18.5256	-0.00741025
0.6582	15.14	-18.1707	-0.00726827
0.65824	-59.17	-17.8098	-0.00712392
0.65828	-5.496	-17.4431	-0.00697724
0.65832	6.989	-17.0707	-0.0068283
0.65836	-60.87	-16.6929	-0.00667716
0.6584	-86.97	-16.3097	-0.00652388
0.65844	-75.09	-15.9213	-0.00636853
0.65848	-85.41	-15.528	-0.00621119
0.65852	-92.2	-15.1298	-0.00605194
0.65856	-43.41	-14.7272	-0.00589087
0.6586	-18.68	-14.3202	-0.0057281
0.65864	12.1	-13.9093	-0.00556373
0.65868	56.61	-13.4947	-0.00539787
0.65872	38.55	-13.0766	-0.00523064
0.65876	11.21	-12.6553	-0.00506214
0.6588	35.92	-12.2311	-0.00489244
0.65884	-55.55	-11.8041	-0.00472165
0.65888	-80.23	-11.3746	-0.00454984
0.65892	-26.85	-10.9428	-0.00437711
0.65896	-33.01	-10.5089	-0.00420355
0.659	-70.73	-10.0731	-0.00402925
0.65904	-10.12	-9.63581	-0.00385432
0.65908	2.538	-9.19721	-0.00367888
0.65912	26.32	-8.75758	-0.00350303
0.65916	54.79	-8.31721	-0.00332689
0.6592	31.7	-7.87636	-0.00315054
0.65924	36.21	-7.43527	-0.00297411
0.65928	73.37	-6.99415	-0.00279766
0.65932	10.57	-6.55321	-0.00262128
0.65936	-25.81	-6.11264	-0.00244505
0.6594	23.46	-5.67259	-0.00226904
0.65944	-25.32	-5.23326	-0.0020933
0.65948	-47.26	-4.79479	-0.00191792
0.65952	-30.29	-4.35737	-0.00174295
0.65956	14.42	-3.92118	-0.00156847
0.6596	23.32	-3.48642	-0.00139457
0.65964	28.75	-3.05326	-0.0012213
0.65968	47.36	-2.62189	-0.00104876
0.65972	72.42	-2.19248	-0.00087699
0.65976	69.53	-1.76515	-0.000706062
0.6598	37.6	-1.34005	-0.000536019
0.65984	-52.55	-0.917248	-0.000366899
0.65988	-25.76	-0.496845	-0.000198738
0.65992	-60.58	-0.0789324	-3.1573e-05
0.65996	-65.18	0.336382	0.000134553
0.66	-44.08	0.74897	0.000299588
0.66004	-1.826	1.15868	0.000463472
0.66008	-21.28	1.56534	0.000626138
0.66012	-9.369	1.96879	0.000787517
0.66016	80.48	2.36884	0.000947536
0.6602	87.77	2.76532	0.00110613
0.66024	76.06	3.15807	0.00126323
0.66028	112.9	3.54698	0.00141879
0.66032	86.55	3.93195	0.00157278
0.66036	30.08	4.31293	0.00172517
0.6604	-1.19	4.6899	0.00187596
0.66044	-9.08	5.06284	0.00202513
0.66048	11.41	5.43174	0.00217269
0.66052	48.84	5.79659	0.00231864
0.66056	41.99	6.15739	0.00246296
0.6606	10.4	6.51414	0.00260566
0.66064	9.185	6.86686	0.00274674
0.66068	87.28	7.21556	0.00288623
0.66072	49.68	7.56029	0.00302412
0.66076	-23.24	7.90109	0.00316044
0.6608	-44.92	8.23801	0.00329521
0.66084	-17.92	8.57112	0.00342845
0.66088	-33.99	8.90045	0.00356018
0.66092	-51.85	9.22603	0.00369041
0.66096	-42.69	9.54787	0.00381915
0.661	-19.74	9.86595	0.00394638
0.66104	-35.38	10.1802	0.00407209
0.66108	-45.06	10.4907	0.00419627
0.66112	-27.55	10.7972	0.00431889
0.66116	3.434	11.0998	0.00443991
0.6612	3.752	11.3982	0.00455929
0.66124	3.579	11.6925	0.004677
0.66128	7.451	11.9825	0.00479298
0.66132	-2.924	12.268	0.0049072
0.66136	-1.999	12.549	0.00501961
0.6614	-38.93	12.8254	0.00513015
0.66144	-26.8	13.097	0.00523879
0.66148	-8.011	13.3636	0.00534545
0.66152	-0.005073	13.6252	0.00545007
0.66156	-0.6409	13.8815	0.0055526
0.6616	22.34	14.1324	0.00565295
0.66164	57.74	14.3776	0.00575105
0.66168	42.94	14.6171	0.00584684
0.66172	63.14	14.8506	0.00594026
0.66176	69.94	15.0781	0.00603123
0.6618	97.07	15.2993	0.00611972
0.66184	84.59	15.5142	0.00620567
0.66188	83.26	15.7227	0.00628906
0.66192	106.9	15.9247	0.00636987
0.66196	98.95	16.1202	0.00644809
0.662	87.31	16.3093	0.00652372
0.66204	96.78	16.492	0.00659679
0.66208	108.4	16.6683	0.00666732
0.66212	105.3	16.8384	0.00673536
0.66216	98.72	17.0024	0.00680097
0.6622	46.44	17.1605	0.00686421
0.66224	66.35	17.3129	0.00692517
0.66228	46.35	17.4599	0.00698394
0.66232	24.01	17.6015	0.00704062
0.66236	21.79	17.7382	0.0070953
0.6624	11.76	17.8702	0.00714808
0.66244	11.38	17.9977	0.00719908
0.66248	0.9776	18.121	0.00724839
0.66252	-29.31	18.2403	0.00729612
0.66256	-16.36	18.3559	0.00734235
0.6626	-10.55	18.468	0.00738719
0.66264	-6.826	18.5768	0.00743072
0.66268	-19.48	18.6825	0.00747302
0.66272	-12.43	18.7854	0.00751416
0.66276	-14.17	18.8856	0.00755422
0.6628	-29.05	18.9832	0.00759327
0.66284	-12.49	19.0784	0.00763136
0.66288	-15.18	19.1714	0.00766855
0.66292	-6.623	19.2622	0.00770488
0.66296	10.37	19.351	0.0077404
0.663	13.78	19.4379	0.00777515
0.66304	27.97	19.5229	0.00780916
0.66308	20.54	19.6062	0.00784248
0.66312	11.76	19.6878	0.00787514
0.66316	4.388	19.7679	0.00790717
0.6632	10.14	19.8466	0.00793862
0.66324	32.91	19.9238	0.00796951
0.66328	6.122	19.9997	0.00799989
0.66332	9.417	20.0744	0.00802977
0.66336	10.05	20.148	0.0080592
0.6634	12.31	20.2205	0.00808821
0.66344	-11.97	20.2921	0.00811682
0.66348	-19.63	20.3627	0.00814506
0.66352	-0.09178	20.4324	0.00817296
0.66356	-7.49	20.5013	0.00820052
0.6636	-13.42	20.5694	0.00822776
0.66364	7.047	20.6367	0.0082547
0.66368	11.09	20.7033	0.00828133
0.66372	15.08	20.7691	0.00830765
0.66376	18.43	20.8342	0.00833367
0.6638	-1.017	20.8985	0.00835938
0.66384	35.6	20.962	0.00838478
0.66388	11.64	21.0247	0.00840987
0.66392	-3.993	21.0866	0.00843464
0.66396	0.8331	21.1477	0.00845908
0.664	-4.08	21.208	0.00848319
0.66404	10.63	21.2674	0.00850696
0.66408	-0.2941	21.3259	0.00853036
0.66412	16.04	21.3835	0.00855339
0.66416	25.63	21.44	0.00857602
0.6642	12.97	21.4956	0.00859823
0.66424	13.49	21.55	0.00861999
0.66428	14.36	21.6032	0.00864129
0.66432	28.69	21.6552	0.0086621
0.66436	33.29	21.706	0.00868239
0.6644	-2.982	21.7554	0.00870215
0.66444	10.8	21.8034	0.00872135
0.66448	31.5	21.8499	0.00873996
0.66452	13.23	21.8949	0.00875795
0.66456	2.625	21.9383	0.00877531
0.6646	18.03	21.98	0.00879199
0.66464	0.3417	22.0199	0.00880797
0.66468	14.33	22.0581	0.00882322
0.66472	-2.808	22.0943	0.00883771
0.66476	23.2	22.1285	0.00885139
0.6648	7.191	22.1606	0.00886422
0.66484	5.284	22.1904	0.00887617
0.66488	17.39	22.218	0.0088872
0.66492	26.73	22.2431	0.00889726
0.66496	28.38	22.2657	0.0089063
0.665	23.35	22.2857	0.00891428
0.66504	13.95	22.3029	0.00892115
0.66508	24.45	22.3172	0.00892688
0.66512	25.4	22.3285	0.00893141
0.66516	-2.317	22.3368	0.0089347
0.6652	34.91	22.3418	0.00893671
0.66524	81.61	22.3435	0.00893738
0.66528	64.99	22.3417	0.00893668
0.66532	31.76	22.3364	0.00893457
0.66536	15.69	22.3275	0.00893101
0.6654	19.79	22.3149	0.00892598
0.66544	71.61	22.2986	0.00891944
0.66548	37.05	22.2784	0.00891137
0.66552	26.38	22.2544	0.00890175
0.66556	50.63	22.2264	0.00889055
0.6656	58.69	22.1944	0.00887775
0.66564	30.72	22.1584	0.00886335
0.66568	-20.03	22.1183	0.00884733
0.66572	-4.196	22.0742	0.00882968
0.66576	67.51	22.026	0.00881038
0.6658	70.48	21.9736	0.00878943
0.66584	42.97	21.917	0.00876681
0.66588	54.94	21.8563	0.00874252
0.66592	43.29	21.7914	0.00871656
0.66596	52.05	21.7223	0.00868893
0.666	39.21	21.6491	0.00865964
0.66604	-10.44	21.5718	0.00862871
0.66608	48.52	21.4904	0.00859614
0.66612	34.1	21.4049	0.00856196
0.66616	24.27	21.3154	0.00852617
0.6662	-2.404	21.222	0.0084888
0.66624	26.47	21.1246	0.00844985
0.66628	48.43	21.0234	0.00840935
0.66632	47.19	20.9183	0.00836732
0.66636	26.7	20.8094	0.00832376
0.6664	28.98	20.6968	0.00827871
0.66644	28.81	20.5805	0.00823219
0.66648	7.365	20.4606	0.00818423
0.66652	35.37	20.3371	0.00813484
0.66656	-8.358	20.2102	0.00808407
0.6666	16.32	20.0798	0.00803192
0.66664	9.937	19.9461	0.00797843
0.66668	18.98	19.8091	0.00792362
0.66672	-13.42	19.6688	0.00786751
0.66676	-13.5	19.5253	0.00781012
0.6668	30.69	19.3787	0.00775146
0.66684	22.86	19.2289	0.00769155
0.66688	49.99	19.076	0.0076304
0.66692	3.03	18.92	0.00756802
0.66696	25.31	18.7611	0.00750443
0.667	27.02	18.5991	0.00743964
0.66704	11.06	18.4342	0.00737367
0.66708	31.67	18.2663	0.00730653
0.66712	12.42	18.0956	0.00723825
0.66716	0.7175	17.9221	0.00716884
0.6672	6.093	17.7458	0.00709831
0.66724	0.1105	17.5667	0.00702669
0.66728	31.82	17.385	0.00695398
0.66732	3.55	17.2005	0.0068802
0.66736	9.446	17.0134	0.00680535
0.6674	17.28	16.8236	0.00672945
0.66744	32.28	16.6312	0.0066525
0.66748	25.92	16.4363	0.00657452
0.66752	40.25	16.2388	0.00649552
0.66756	72.25	16.0388	0.0064155
0.6676	87.51	15.8363	0.0063345
0.66764	72.74	15.6313	0.00625254
0.66768	65.69	15.4241	0.00616965
0.66772	68.09	15.2147	0.00608587
0.66776	-4.282	15.0032	0.00600128
0.6678	14.94	14.7898	0.00591591
0.66784	-13.82	14.5746	0.00582983
0.66788	-31.54	14.3578	0.0057431
0.66792	-20.09	14.1394	0.00565578
0.66796	2.827	13.9198	0.00556791
0.668	-45.99	13.6988	0.00547953
0.66804	-48.39	13.4767	0.00539069
0.66808	-13.39	13.2535	0.00530141
0.66812	-31.77	13.0293	0.00521171
0.66816	14.04	12.8041	0.00512162
0.6682	64.82	12.5779	0.00503115
0.66824	86.9	12.3508	0.00494031
0.66828	59.96	12.1228	0.00484911
0.66832	43.98	11.894	0.0047576
0.66836	-2.837	11.6645	0.0046658
0.6684	-17.61	11.4344	0.00457376
0.66844	10.02	11.2038	0.00448151
0.66848	-16.91	10.9727	0.00438909
0.66852	9.243	10.7414	0.00429654
0.66856	52.22	10.5097	0.00420389
0.6686	51.55	10.2779	0.00411117
0.66864	-18.07	10.0461	0.00401843
0.66868	10.49	9.81423	0.00392569
0.66872	-25.58	9.58252	0.00383301
0.66876	-43.76	9.35104	0.00374042
0.6688	2.018	9.11987	0.00364795
0.66884	6.006	8.88908	0.00355563
0.66888	7.249	8.65874	0.00346349
0.66892	21.38	8.4289	0.00337156
0.66896	-26.28	8.19963	0.00327985
0.669	-57.52	7.97098	0.00318839
0.66904	-7.548	7.743	0.0030972
0.66908	7.336	7.51574	0.00300629
0.66912	15.6	7.28919	0.00291568
0.66916	28.17	7.0634	0.00282536
0.6692	63.98	6.83839	0.00273535
0.66924	39.5	6.61418	0.00264567
0.66928	-2.895	6.39084	0.00255633
0.66932	-25.44	6.16841	0.00246737
0.66936	-77.46	5.94697	0.00237879
0.6694	-61.33	5.72655	0.00229062
0.66944	6.816	5.50717	0.00220287
0.66948	2.105	5.28883	0.00211553
0.66952	25.05	5.07153	0.00202861
0.66956	58.32	4.85526	0.0019421
0.6696	8.405	4.64002	0.00185601
0.66964	21.35	4.42582	0.00177033
0.66968	49.53	4.2127	0.00168508
0.66972	-34.63	4.00067	0.00160027
0.66976	-0.1785	3.78977	0.00151591
0.6698	-20.93	3.58004	0.00143201
0.66984	-25.15	3.37149	0.0013486
0.66988	-39.89	3.16416	0.00126566
0.66992	-27.81	2.95804	0.00118322
0.66996	-48.99	2.75312	0.00110125
0.67	-40.78	2.54939	0.00101975
0.67004	11.67	2.34679	0.000938715
0.67008	23.64	2.14528	0.000858112
0.67012	46.32	1.94481	0.000777922
0.67016	61.58	1.74532	0.000698129
0.6702	12.8	1.5468	0.000618722
0.67024	21.15	1.34924	0.000539695
0.67028	24.68	1.15262	0.000461047
0.67032	-43.15	0.956952	0.000382781
0.67036	-40.52	0.762248	0.000304899
0.6704	-24.4	0.5685	0.0002274
0.67044	-34.17	0.375694	0.000150278
0.67048	-19.48	0.183801	7.35202e-05
0.67052	17.25	-0.00722036	-2.88814e-06
0.67056	14.33	-0.197412	-7.8965e-05
0.6706	6.006	-0.386819	-0.000154727
0.67064	15.28	-0.575477	-0.000230191
0.67068	-14.05	-0.763422	-0.000305369
0.67072	18	-0.950686	-0.000380274
0.67076	11.09	-1.1373	-0.000454919
0.6708	14.19	-1.32328	-0.000529314
0.67084	-1.624	-1.50867	-0.000603467
0.67088	-12.49	-1.69346	-0.000677385
0.67092	6.642	-1.87769	-0.000751076
0.67096	-15.81	-2.06136	-0.000824545
0.671	-15.73	-2.2445	-0.000897801
0.67104	-6.017	-2.42713	-0.000970853
0.67108	3.81	-2.60927	-0.00104371
0.67112	2.769	-2.79096	-0.00111638
0.67116	-24.11	-2.97221	-0.00118888
0.6712	-18.47	-3.15305	-0.00126122
0.67124	-24.89	-3.33352	-0.00133341
0.67128	-29.02	-3.51365	-0.00140546
0.67132	-40.24	-3.6935	-0.0014774
0.67136	-28.53	-3.87312	-0.00154925
0.6714	-50.78	-4.05258	-0.00162103
0.67144	-38.67	-4.23196	-0.00169278
0.67148	-15.06	-4.41137	-0.00176455
0.67152	-2.982	-4.59091	-0.00183637
0.67156	2.914	-4.7707	-0.00190828
0.6716	8.665	-4.95086	-0.00198034
0.67164	36.79	-5.13149	-0.0020526
0.67168	14.65	-5.31271	-0.00212508
0.67172	40.57	-5.4946	-0.00219784
0.67176	19.97	-5.67725	-0.0022709
0.6718	20.2	-5.86072	-0.00234429
0.67184	-4.571	-6.04508	-0.00241803
0.67188	-14.05	-6.23037	-0.00249215
0.67192	-11.39	-6.41664	-0.00256665
0.67196	-15.47	-6.60393	-0.00264157
0.672	-16.45	-6.7923	-0.00271692
0.67204	2.134	-6.98179	-0.00279272
0.67208	11.99	-7.17247	-0.00286899
0.67212	10.92	-7.36438	-0.00294575
0.67216	37.54	-7.55757	-0.00302303
0.6722	34.36	-7.75208	-0.00310083
0.67224	2.018	-7.94792	-0.00317917
0.67228	-33.76	-8.1451	-0.00325804
0.67232	-38.33	-8.34363	-0.00333745
0.67236	-11.13	-8.54353	-0.00341741
0.6724	-46.16	-8.7448	-0.00349792
0.67244	-3.936	-8.94748	-0.00357899
0.67248	8.347	-9.15159	-0.00366064
0.67252	13.32	-9.35718	-0.00374287
0.67256	9.764	-9.56426	-0.0038257
0.6726	12.94	-9.77286	-0.00390915
0.67264	4.85	-9.983	-0.0039932
0.67268	22.02	-10.1947	-0.00407787
0.67272	33.46	-10.4079	-0.00416314
0.67276	13.43	-10.6226	-0.00424903
0.6728	21.76	-10.8387	-0.0043355
0.67284	-22.81	-11.0564	-0.00442255
0.67288	-53.88	-11.2754	-0.00451015
0.67292	-26.74	-11.4957	-0.00459829
0.67296	-27.29	-11.7174	-0.00468696
0.673	-20.96	-11.9403	-0.00477613
0.67304	2.509	-12.1645	-0.00486581
0.67308	0.1394	-12.3899	-0.00495597
0.67312	19.1	-12.6166	-0.00504662
0.67316	6.324	-12.8444	-0.00513774
0.6732	-5.207	-13.0733	-0.00522932
0.67324	-26.28	-13.3033	-0.00532132
0.67328	-35.18	-13.5344	-0.00541375
0.67332	-27.37	-13.7664	-0.00550657
0.67336	-3.676	-13.9994	-0.00559977
0.6734	-5.294	-14.2333	-0.00569334
0.67344	20.43	-14.4681	-0.00578725
0.67348	-10.93	-14.7038	-0.0058815
0.67352	-15.87	-14.9402	-0.00597607
0.67356	-22.55	-15.1773	-0.00607092
0.6736	1.093	-15.4151	-0.00616604
0.67364	8.954	-15.6535	-0.00626141
0.67368	10.05	-15.8925	-0.006357
0.67372	27.42	-16.1319	-0.00645278
0.67376	21.61	-16.3718	-0.00654872
0.6738	-16.02	-16.612	-0.00664478
0.67384	-12.06	-16.8523	-0.00674093
0.67388	-29.72	-17.0928	-0.0068371
0.67392	-27.32	-17.3332	-0.00693327
0.67396	-6.508	-17.5734	-0.00702938
0.674	1.845	-17.8135	-0.00712539
0.67404	20.98	-18.0531	-0.00722126
0.67408	7.307	-18.2923	-0.00731693
0.67412	8.492	-18.5309	-0.00741236
0.67416	-8.675	-18.7687	-0.0075075
0.6742	-25.47	-19.0057	-0.00760226
0.67424	-14.72	-19.2415	-0.00769661
0.67428	-1.248	-19.4762	-0.00779046
0.67432	-5.496	-19.7094	-0.00788377
0.67436	-15.55	-19.9411	-0.00797645
0.6744	-8.531	-20.1711	-0.00806846
0.67444	-30.9	-20.3993	-0.0081597
0.67448	-23.59	-20.6253	-0.00825013
0.67452	-11.71	-20.8492	-0.00833966
0.67456	-9.687	-21.0706	-0.00842823
0.6746	-2.173	-21.2894	-0.00851576
0.67464	2.307	-21.5055	-0.00860219
0.67468	-33.96	-21.7186	-0.00868744
0.67472	-37.58	-21.9286	-0.00877144
0.67476	-37.37	-22.1352	-0.0088541
0.6748	-62.78	-22.3384	-0.00893535
0.67484	-39.11	-22.5378	-0.00901512
0.67488	-6.508	-22.7334	-0.00909335
0.67492	-6.941	-22.9249	-0.00916996
0.67496	15.92	-23.1123	-0.00924491
0.675	22.65	-23.2953	-0.0093181
0.67504	-49.34	-23.4737	-0.00938948
0.67508	-22.55	-23.6474	-0.00945896
0.67512	15.8	-23.8162	-0.00952646
0.67516	-29.37	-23.9798	-0.00959191
0.6752	-95.99	-24.1381	-0.00965522
0.67524	-67.08	-24.2908	-0.00971632
0.67528	-57.43	-24.4378	-0.00977513
0.67532	-88.15	-24.579	-0.00983158
0.67536	-91.36	-24.7141	-0.00988563
0.6754	-94.71	-24.843	-0.00993721
0.67544	-32.61	-24.9657	-0.0099863
0.67548	28.43	-25.0821	-0.0100329
0.67552	13.17	-25.1921	-0.0100768
0.67556	-37.95	-25.2956	-0.0101182
0.6756	-6.855	-25.3925	-0.010157
0.67564	7.191	-25.4828	-0.0101931
0.67568	-58.85	-25.5662	-0.0102265
0.67572	-90.23	-25.6427	-0.0102571
0.67576	-89.8	-25.7123	-0.0102849
0.6758	-85.41	-25.7748	-0.0103099
0.67584	-103.4	-25.8301	-0.010332
0.67588	-63.62	-25.8783	-0.0103513
0.67592	-59.57	-25.9193	-0.0103677
0.67596	-4.311	-25.9532	-0.0103813
0.676	-17.14	-25.98	-0.010392
0.67604	-15.47	-25.9997	-0.0103999
0.67608	14.99	-26.0122	-0.0104049
0.67612	-19.8	-26.0177	-0.0104071
0.67616	-43.82	-26.0162	-0.0104065
0.6762	-33.33	-26.0075	-0.010403
0.67624	-28.36	-25.9918	-0.0103967
0.67628	-65.44	-25.969	-0.0103876
0.67632	-69.37	-25.9392	-0.0103757
0.67636	-78.24	-25.9023	-0.0103609
0.6764	-67.06	-25.8585	-0.0103434
0.67644	-45.44	-25.8077	-0.0103231
0.67648	-25.93	-25.75	-0.0103
0.67652	-11.59	-25.6856	-0.0102742
0.67656	27.16	-25.6145	-0.0102458
0.6766	32.45	-25.5367	-0.0102147
0.67664	-28.68	-25.4524	-0.0101809
0.67668	-49.6	-25.3615	-0.0101446
0.67672	-58.85	-25.2641	-0.0101057
0.67676	-60.38	-25.1604	-0.0100641
0.6768	-46.04	-25.0502	-0.0100201
0.67684	-49.14	-24.9337	-0.00997348
0.67688	-44.22	-24.811	-0.00992439
0.67692	-58.56	-24.6821	-0.00987285
0.67696	-36.36	-24.5472	-0.0098189
0.677	2.509	-24.4064	-0.00976257
0.67704	-15.18	-24.2598	-0.00970391
0.67708	10.86	-24.1074	-0.00964297
0.67712	-19.57	-23.9495	-0.00957979
0.67716	-35.76	-23.786	-0.00951439
0.6772	-11.57	-23.6171	-0.00944682
0.67724	-18.47	-23.4428	-0.00937712
0.67728	25.63	-23.2633	-0.00930532
0.67732	6.816	-23.0786	-0.00923144
0.67736	-34.25	-22.8888	-0.00915552
0.6774	-35.84	-22.6939	-0.00907758
0.67744	-33.04	-22.4941	-0.00899764
0.67748	-38.5	-22.2893	-0.00891573
0.67752	-46.45	-22.0797	-0.00883188
0.67756	-3.849	-21.8653	-0.00874612
0.6776	-9.196	-21.6462	-0.00865847
0.67764	-33.15	-21.4224	-0.00856897
0.67768	-37.87	-21.1941	-0.00847764
0.67772	-87.2	-20.9613	-0.00838453
0.67776	-37.52	-20.7241	-0.00828966
0.6778	-77	-20.4827	-0.00819307
0.67784	-35.9	-20.2371	-0.00809482
0.67788	-40.67	-19.9874	-0.00799496
0.67792	24.5	-19.7338	-0.00789354
0.67796	9.359	-19.4766	-0.00779062
0.678	-1.566	-19.2156	-0.00768626
0.67804	-27.46	-18.9513	-0.0075805
0.67808	-55.93	-18.6835	-0.0074734
0.67812	-33.39	-18.4125	-0.00736501
0.67816	-43.3	-18.1384	-0.00725537
0.6782	-36.45	-17.8614	-0.00714455
0.67824	-33.67	-17.5815	-0.0070326
0.67828	-22.06	-17.299	-0.00691959
0.67832	-11.57	-17.014	-0.00680559
0.67836	4.07	-16.7266	-0.00669065
0.6784	-14.17	-16.4371	-0.00657484
0.67844	-8.184	-16.1456	-0.00645823
0.67848	-7.346	-15.8522	-0.00634088
0.67852	18.06	-15.5571	-0.00622285
0.67856	22.31	-15.2605	-0.0061042
0.6786	-10.32	-14.9624	-0.00598498
0.67864	-21.05	-14.6631	-0.00586523
0.67868	-25.12	-14.3626	-0.00574502
0.67872	-45.76	-14.061	-0.00562439
0.67876	-49.05	-13.7585	-0.00550339
0.6788	-32.26	-13.4552	-0.00538207
0.67884	-16.07	-13.1512	-0.0052605
0.67888	3.434	-12.8468	-0.00513873
0.67892	15.89	-12.5421	-0.00501684
0.67896	19.19	-12.2372	-0.00489487
0.679	4.706	-11.9322	-0.0047729
0.67904	11.64	-11.6274	-0.00465096
0.67908	-55.32	-11.3228	-0.00452912
0.67912	-19.69	-11.0185	-0.00440741
0.67916	-4.051	-10.7148	-0.0042859
0.6792	-34.69	-10.4116	-0.00416463
0.67924	-31.42	-10.1092	-0.00404366
0.67928	-13.53	-9.80763	-0.00392305
0.67932	-29.4	-9.50714	-0.00380285
0.67936	-34.11	-9.20784	-0.00368313
0.6794	-10.21	-8.90989	-0.00356396
0.67944	-23.91	-8.61347	-0.00344539
0.67948	24.56	-8.31874	-0.0033275
0.67952	62.85	-8.02587	-0.00321035
0.67956	48.23	-7.73502	-0.00309401
0.6796	34.24	-7.44633	-0.00297853
0.67964	20.31	-7.1599	-0.00286396
0.67968	-1.306	-6.87585	-0.00275034
0.67972	-40.21	-6.59426	-0.00263771
0.67976	-42.87	-6.31523	-0.00252609
0.6798	-49.14	-6.03884	-0.00241553
0.67984	-1.45	-5.76521	-0.00230608
0.67988	34.07	-5.49446	-0.00219779
[truncated: 23,003 more rows]

## Sheet: Sheet2
0.781	12.48	0.0767222	3.06889e-05
0.78104	12.88	0.341373	0.000136549
0.78108	0.8909	0.604081	0.000241632
0.78112	23.23	0.864793	0.000345917
0.78116	6.873	1.12346	0.000449384
0.7812	-21.85	1.38004	0.000552015
0.78124	-13.56	1.63448	0.000653792
0.78128	-27.75	1.88674	0.000754694
0.78132	-8.964	2.13675	0.0008547
0.78136	12.65	2.38446	0.000953784
0.7814	21.38	2.62979	0.00105192
0.78144	-5.583	2.87269	0.00114907
0.78148	-7.953	3.11307	0.00124523
0.78152	7.625	3.35089	0.00134036
0.78156	5.92	3.58607	0.00143443
0.7816	16.58	3.81855	0.00152742
0.78164	26.09	4.04826	0.0016193
0.78168	10.6	4.27515	0.00171006
0.78172	6.006	4.49915	0.00179966
0.78176	-3.676	4.72023	0.00188809
0.7818	-4.86	4.93833	0.00197533
0.78184	25.54	5.1534	0.00206136
0.78188	24.53	5.36538	0.00214615
0.78192	3.492	5.57423	0.00222969
0.78196	-14.89	5.77991	0.00231196
0.782	-5.438	5.98237	0.00239295
0.78204	15.72	6.18157	0.00247263
0.78208	29.19	6.37745	0.00255098
0.78212	17.51	6.56996	0.00262798
0.78216	38.49	6.75907	0.00270363
0.7822	33.52	6.94474	0.0027779
0.78224	37.74	7.12695	0.00285078
0.78228	29.1	7.30569	0.00292228
0.78232	23.52	7.48095	0.00299238
0.78236	33.81	7.65273	0.00306109
0.7824	31.84	7.82106	0.00312842
0.78244	45.72	7.98596	0.00319438
0.78248	22.88	8.14747	0.00325899
0.78252	18.93	8.30563	0.00332225
0.78256	36.29	8.46049	0.0033842
0.7826	41.61	8.61212	0.00344485
0.78264	57.02	8.76059	0.00350424
0.78268	38.32	8.90599	0.0035624
0.78272	49.04	9.04841	0.00361936
0.78276	16.12	9.18798	0.00367519
0.7828	37.25	9.32481	0.00372992
0.78284	-1.306	9.45904	0.00378362
0.78288	8.81	9.59082	0.00383633
0.78292	-5.756	9.72028	0.00388811
0.78296	6.989	9.84756	0.00393902
0.783	-1.624	9.9728	0.00398912
0.78304	2.769	10.0961	0.00403845
0.78308	8.983	10.2177	0.00408707
0.78312	0.8331	10.3375	0.00413502
0.78316	6.382	10.4559	0.00418236
0.7832	12.25	10.5728	0.00422913
0.78324	-2.288	10.6885	0.00427539
0.78328	10.72	10.8029	0.00432118
0.78332	11.9	10.9164	0.00436654
0.78336	-2.173	11.0288	0.00441153
0.7834	-8.849	11.1405	0.00445618
0.78344	-7.693	11.2514	0.00450054
0.78348	-8.733	11.3617	0.00454466
0.78352	2.683	11.4714	0.00458857
0.78356	1.324	11.5807	0.0046323
0.7836	11.9	11.6897	0.00467588
0.78364	0.9776	11.7984	0.00471936
0.78368	-2.317	11.9069	0.00476276
0.78372	8.896	12.0153	0.00480611
0.78376	-5.901	12.1236	0.00484943
0.7838	3.55	12.2319	0.00489276
0.78384	-7.259	12.3403	0.00493612
0.78388	-17.61	12.4488	0.00497953
0.78392	-6.334	12.5575	0.00502301
0.78396	11.27	12.6664	0.00506658
0.784	-18.33	12.7756	0.00511024
0.78404	6.411	12.885	0.00515401
0.78408	-17.72	12.9947	0.00519789
0.78412	16.24	13.1047	0.0052419
0.78416	21.27	13.2151	0.00528603
0.7842	13.09	13.3257	0.00533028
0.78424	20.51	13.4367	0.00537466
0.78428	15.08	13.5479	0.00541917
0.78432	2.827	13.6595	0.00546381
0.78436	6.122	13.7715	0.00550858
0.7844	8.087	13.8837	0.0055535
0.78444	-4.745	13.9964	0.00559855
0.78448	4.504	14.1093	0.00564374
0.78452	0.3417	14.2227	0.00568906
0.78456	-7.346	14.3363	0.00573451
0.7846	-5.034	14.4502	0.00578009
0.78464	-7.548	14.5644	0.00582578
0.78468	-14.48	14.6789	0.00587156
0.78472	4.272	14.7936	0.00591743
0.78476	3.232	14.9084	0.00596336
0.7848	10.98	15.0233	0.00600932
0.78484	-2.895	15.1383	0.0060553
0.78488	0.7175	15.2532	0.00610127
0.78492	-3.791	15.368	0.00614719
0.78496	-15.03	15.4826	0.00619304
0.785	-7.751	15.5969	0.00623878
0.78504	-20.96	15.7109	0.00628437
0.78508	-13.42	15.8244	0.00632977
0.78512	9.041	15.9373	0.00637493
0.78516	18.43	16.0495	0.00641981
0.7852	-9.571	16.1608	0.00646434
0.78524	2.076	16.2712	0.00650847
0.78528	40.37	16.3804	0.00655214
0.78532	79.47	16.4883	0.0065953
0.78536	17.45	16.5947	0.00663789
0.7854	18.03	16.6997	0.00667987
0.78544	48.78	16.8029	0.00672117
0.78548	31.9	16.9044	0.00676177
0.78552	18.4	17.0041	0.00680162
0.78556	25.17	17.1017	0.00684068
0.7856	51.7	17.1973	0.00687891
0.78564	23.66	17.2907	0.00691628
0.78568	-23.15	17.3819	0.00695275
0.78572	16.41	17.4707	0.00698829
0.78576	46.73	17.5572	0.00702286
0.7858	70.95	17.6411	0.00705643
0.78584	35.75	17.7224	0.00708898
0.78588	25.05	17.8012	0.00712046
0.78592	71.87	17.8772	0.00715087
0.78596	25.08	17.9505	0.00718018
0.786	23.2	18.021	0.00720839
0.78604	27.1	18.0887	0.00723547
0.78608	13.38	18.1535	0.00726142
0.78612	11.96	18.2156	0.00728623
0.78616	29.19	18.2747	0.0073099
0.7862	-12.84	18.331	0.00733241
0.78624	-3.069	18.3844	0.00735375
0.78628	26.61	18.4348	0.00737391
0.78632	1.874	18.4822	0.00739288
0.78636	17.02	18.5266	0.00741064
0.7864	24.39	18.5679	0.00742717
0.78644	34.73	18.6062	0.00744246
0.78648	23.87	18.6412	0.00745649
0.78652	27.1	18.6731	0.00746924
0.78656	46.15	18.7018	0.00748071
0.7866	26.38	18.7272	0.00749087
0.78664	-8.097	18.7493	0.00749972
0.78668	-5.294	18.7681	0.00750726
0.78672	22.48	18.7837	0.00751347
0.78676	35.83	18.7958	0.00751833
0.7868	21.3	18.8046	0.00752184
0.78684	0.2261	18.81	0.00752398
0.78688	37.16	18.8119	0.00752475
0.78692	39.18	18.8103	0.00752412
0.78696	46.06	18.8052	0.00752209
0.787	40.14	18.7966	0.00751865
0.78704	17.91	18.7845	0.00751379
0.78708	-0.6409	18.7688	0.00750752
0.78712	25.37	18.7496	0.00749983
0.78716	24.99	18.7268	0.00749073
0.7872	31.96	18.7005	0.0074802
0.78724	23.35	18.6706	0.00746825
0.78728	10.89	18.6372	0.00745488
0.78732	32.22	18.6002	0.0074401
0.78736	46.5	18.5597	0.00742389
0.7874	36.03	18.5157	0.00740626
0.78744	21.35	18.4681	0.00738723
0.78748	21.99	18.417	0.0073668
0.78752	38.9	18.3624	0.00734498
0.78756	31.96	18.3044	0.00732178
0.7876	46.18	18.243	0.00729721
0.78764	55.31	18.1783	0.0072713
0.78768	37.83	18.1102	0.00724407
0.78772	38.23	18.0388	0.00721553
0.78776	41.7	17.9643	0.00718573
0.7878	22.8	17.8867	0.00715468
0.78784	6.064	17.8061	0.00712244
0.78788	19.76	17.7226	0.00708903
0.78792	24.85	17.6362	0.00705449
0.78796	3.694	17.5471	0.00701886
0.788	4.041	17.4554	0.00698217
0.78804	19.24	17.3612	0.00694446
0.78808	13.41	17.2644	0.00690577
0.78812	28.35	17.1653	0.00686612
0.78816	21.41	17.0639	0.00682555
0.7882	16.79	16.9602	0.00678409
0.78824	27.31	16.8544	0.00674178
0.78828	13.98	16.7466	0.00669865
0.78832	17.57	16.6369	0.00665474
0.78836	15.4	16.5252	0.00661009
0.7884	29.53	16.4118	0.00656473
0.78844	32.74	16.2967	0.0065187
0.78848	14.04	16.1801	0.00647203
0.78852	6.498	16.0619	0.00642477
0.78856	-6.074	15.9424	0.00637696
0.7886	18.52	15.8216	0.00632864
0.78864	5.602	15.6996	0.00627983
0.78868	15.75	15.5765	0.00623059
0.78872	19.88	15.4523	0.00618093
0.78876	41.79	15.3273	0.0061309
0.7888	20.2	15.2014	0.00608054
0.78884	-4.051	15.0747	0.00602988
0.78888	19.3	14.9474	0.00597896
0.78892	28.43	14.8195	0.00592782
0.78896	24.04	14.6912	0.00587649
0.789	14.5	14.5626	0.00582502
0.78904	17.34	14.4336	0.00577345
0.78908	5.862	14.3045	0.00572182
0.78912	11.93	14.1754	0.00567017
0.78916	16.56	14.0463	0.00561854
0.7892	-1.768	13.9174	0.00556697
0.78924	8.781	13.7887	0.0055155
0.78928	11.5	13.6604	0.00546417
0.78932	17.1	13.5325	0.00541301
0.78936	35.4	13.4052	0.00536208
0.7894	9.937	13.2785	0.00531139
0.78944	17.45	13.1525	0.005261
0.78948	40.43	13.0273	0.00521094
0.78952	9.012	12.9031	0.00516126
0.78956	23.12	12.78	0.00511199
0.7896	20.95	12.658	0.00506319
0.78964	19.71	12.5373	0.00501491
0.78968	16.56	12.4179	0.00496718
0.78972	-13.18	12.3001	0.00492006
0.78976	1.931	12.184	0.00487359
0.7898	-6.537	12.0696	0.00482783
0.78984	24.19	11.957	0.00478282
0.78988	13.87	11.8465	0.00473859
0.78992	-1.768	11.738	0.0046952
0.78996	0.4862	11.6317	0.00465267
0.79	9.099	11.5277	0.00461107
0.79004	15.77	11.426	0.00457041
0.79008	-6.19	11.3269	0.00453075
0.79012	8.839	11.2303	0.00449213
0.79016	16.21	11.1364	0.00445457
0.7902	-11.02	11.0453	0.00441812
0.79024	-10.06	10.957	0.00438281
0.79028	14.82	10.8717	0.00434868
0.79032	2.134	10.7894	0.00431575
0.79036	-5.092	10.7102	0.00428407
0.7904	-6.739	10.6341	0.00425365
0.79044	6.266	10.5613	0.00422453
0.79048	17.19	10.4918	0.00419672
0.79052	-2.317	10.4257	0.00417026
0.79056	-4.745	10.3629	0.00414517
0.7906	36.7	10.3037	0.00412147
0.79064	14.39	10.248	0.00409918
0.79068	9.879	10.1958	0.00407833
0.79072	34.33	10.1474	0.00405894
0.79076	-11.33	10.1026	0.00404104
0.7908	5.284	10.0616	0.00402465
0.79084	17.71	10.0245	0.0040098
0.79088	17.08	9.99131	0.00399652
0.79092	21.06	9.96208	0.00398483
0.79096	1.209	9.93691	0.00397476
0.791	39.3	9.91585	0.00396634
0.79104	2.596	9.89899	0.00395959
0.79108	13.69	9.88639	0.00395456
0.79112	11.58	9.87814	0.00395126
0.79116	15.66	9.87432	0.00394973
0.7912	6.498	9.875	0.00395
0.79124	11.24	9.88027	0.00395211
0.79128	3.723	9.8902	0.00395608
0.79132	2.336	9.90489	0.00396196
0.79136	22.19	9.9244	0.00396976
0.7914	2.683	9.94882	0.00397953
0.79144	-1.595	9.97822	0.00399129
0.79148	15.6	10.0127	0.00400507
0.79152	17.54	10.0523	0.00402091
0.79156	20.23	10.0971	0.00403884
0.7916	9.561	10.1472	0.00405888
0.79164	5.544	10.2027	0.00408107
0.79168	36.87	10.2636	0.00410544
0.79172	27.16	10.3301	0.00413202
0.79176	22.25	10.4022	0.00416086
0.7918	25.63	10.48	0.00419199
0.79184	27.62	10.5636	0.00422545
0.79188	27.62	10.6532	0.00426129
0.79192	4.475	10.7489	0.00429954
0.79196	29.76	10.8507	0.00434027
0.792	25.83	10.9588	0.00438351
0.79204	38.92	11.0733	0.00442932
0.79208	31.61	11.1944	0.00447776
0.79212	19.97	11.3222	0.00452887
0.79216	10.4	11.4568	0.00458272
0.7922	6.902	11.5984	0.00463938
0.79224	27.13	11.7472	0.0046989
0.79228	16.24	11.9034	0.00476134
0.79232	25.8	12.0669	0.00482677
0.79236	16.87	12.2382	0.00489526
0.7924	15.02	12.4172	0.00496687
0.79244	23.61	12.6042	0.00504166
0.79248	10.54	12.7993	0.00511972
0.79252	19.04	13.0027	0.00520109
0.79256	23.49	13.2147	0.00528586
0.7926	24.39	13.4352	0.0053741
0.79264	18.26	13.6647	0.00546587
0.79268	21.09	13.9031	0.00556126
0.79272	41.55	14.1508	0.00566032
0.79276	17.57	14.4079	0.00576315
0.7928	20.77	14.6746	0.00586983
0.79284	16.15	14.951	0.00598042
0.79288	15.37	15.2375	0.00609501
0.79292	27.94	15.5342	0.00621368
0.79296	20.63	15.8413	0.00633652
0.793	34.04	16.159	0.00646361
0.79304	23.03	16.4876	0.00659504
0.79308	26.41	16.8272	0.00673088
0.79312	19.45	17.1781	0.00687123
0.79316	33.06	17.5405	0.00701618
0.7932	9.33	17.9145	0.00716582
0.79324	25.46	18.3006	0.00732024
0.79328	10.69	18.6988	0.00747952
0.79332	20.46	19.1094	0.00764378
0.79336	7.972	19.5327	0.00781308
0.7934	16.18	19.9688	0.00798754
0.79344	24.99	20.4181	0.00816722
0.79348	26.32	20.8806	0.00835224
0.79352	11.99	21.3567	0.00854266
0.79356	28.92	21.8465	0.00873859
0.7936	9.908	22.3503	0.00894012
0.79364	17.31	22.8683	0.00914732
0.79368	24.97	23.4008	0.0093603
0.79372	20.63	23.9478	0.00957914
0.79376	18.52	24.5098	0.00980392
0.7938	17.8	25.0868	0.0100347
0.79384	23.38	25.6792	0.0102717
0.79388	15.49	26.287	0.0105148
0.79392	14.16	26.9106	0.0107642
0.79396	15.28	27.55	0.01102
0.794	11.93	28.2057	0.0112823
0.79404	24.39	28.8776	0.011551
0.79408	40.57	29.566	0.0118264
0.79412	25.2	30.2712	0.0121085
0.79416	31.79	30.9932	0.0123973
0.7942	23.98	31.7324	0.012693
0.79424	41.06	32.4888	0.0129955
0.79428	10.72	33.2627	0.0133051
0.79432	19.71	34.0542	0.0136217
0.79436	15.49	34.8636	0.0139454
0.7944	9.677	35.691	0.0142764
0.79444	22.16	36.5366	0.0146146
0.79448	31.29	37.4005	0.0149602
0.79452	14.33	38.2829	0.0153132
0.79456	20.49	39.1839	0.0156736
0.7946	28.26	40.1038	0.0160415
0.79464	18.2	41.0426	0.016417
0.79468	34.97	42.0004	0.0168001
0.79472	20.05	42.9774	0.0171909
0.79476	27.74	43.9736	0.0175894
0.7948	5.399	44.9893	0.0179957
0.79484	6.324	46.0244	0.0184098
0.79488	22.19	47.0792	0.0188317
0.79492	14.65	48.1535	0.0192614
0.79496	26.64	49.2476	0.019699
0.795	21.03	50.3614	0.0201446
0.79504	6.411	51.4951	0.020598
0.79508	-50.78	52.6485	0.0210594
0.79512	-23.53	53.8217	0.0215287
0.79516	4.735	55.0148	0.0220059
0.7952	-30.44	56.2275	0.022491
0.79524	-27.72	57.4599	0.0229839
0.79528	31.12	58.7118	0.0234847
0.79532	-9.918	59.983	0.0239932
0.79536	-33.82	61.2734	0.0245094
0.7954	-55.06	62.5829	0.0250331
0.79544	-9.803	63.9111	0.0255644
0.79548	15.89	65.2578	0.0261031
0.79552	36.15	66.6227	0.0266491
0.79556	3.29	68.0054	0.0272022
0.7956	-18.42	69.4057	0.0277623
0.79564	-35.18	70.8231	0.0283293
0.79568	19.88	72.2573	0.0289029
0.79572	4.388	73.7078	0.0294831
0.79576	6.151	75.1742	0.0300697
0.7958	63.2	76.656	0.0306624
0.79584	33.87	78.1526	0.031261
0.79588	14.3	79.6635	0.0318654
0.79592	11.53	81.1882	0.0324753
0.79596	34.47	82.7261	0.0330905
0.796	5.862	84.2767	0.0337107
0.79604	-3.069	85.8393	0.0343357
0.79608	21.7	87.4132	0.0349653
0.79612	62.1	88.9978	0.0355991
0.79616	71.53	90.5924	0.036237
0.7962	22.91	92.1963	0.0368785
0.79624	27.97	93.8087	0.0375235
0.79628	8.868	95.4289	0.0381715
0.79632	56.53	97.0561	0.0388224
0.79636	39.1	98.6894	0.0394758
0.7964	29.71	100.328	0.0401313
0.79644	1.613	101.971	0.0407886
0.79648	33.14	103.618	0.0414473
0.79652	-7.722	105.268	0.0421071
0.79656	-18.59	106.919	0.0427677
0.7966	-10.5	108.571	0.0434285
0.79664	-26.45	110.223	0.0440892
0.79668	-3.271	111.873	0.0447493
0.79672	11.58	113.521	0.0454085
0.79676	-0.3519	115.165	0.0460661
0.7968	-3.473	116.804	0.0467217
0.79684	0.05273	118.437	0.0473749
0.79688	-4.514	120.063	0.048025
0.79692	-14.92	121.679	0.0486716
0.79696	23	123.285	0.049314
0.797	12.65	124.879	0.0499516
0.79704	14.65	126.46	0.0505839
0.79708	-11.28	128.026	0.0512102
0.79712	-16.19	129.575	0.05183
0.79716	-23.36	131.106	0.0524424
0.7972	28.09	132.617	0.0530468
0.79724	13.55	134.106	0.0536426
0.79728	-4.889	135.572	0.0542289
0.79732	8.376	137.013	0.0548051
0.79736	-16.05	138.426	0.0553703
0.7974	6.613	139.81	0.0559238
0.79744	-13.56	141.162	0.0564648
0.79748	12.31	142.481	0.0569924
0.79752	10.66	143.764	0.0575057
0.79756	-17.98	145.01	0.0580038
0.7976	4.417	146.215	0.058486
0.79764	-27.92	147.378	0.0589511
0.79768	-16.83	148.496	0.0593984
0.79772	35.4	149.567	0.0598267
0.79776	12.91	150.588	0.0602351
0.7978	93.84	151.556	0.0606225
0.79784	328.1	152.47	0.060988
0.79788	612.5	153.326	0.0613305
0.79792	903.6	154.122	0.0616489
0.79796	1261	154.856	0.0619423
0.798	1524	155.525	0.06221
0.79804	1606	156.128	0.0624513
0.79808	1677	156.664	0.0626657
0.79812	1616	157.133	0.0628531
0.79816	1432	157.534	0.0630134
0.7982	1265	157.868	0.063147
0.79824	1085	158.136	0.0632543
0.79828	903.8	158.34	0.0633358
0.79832	727.4	158.481	0.0633925
0.79836	483.1	158.563	0.0634251
0.7984	351.2	158.587	0.0634347
0.79844	230.3	158.556	0.0634224
0.79848	131.3	158.473	0.0633891
0.79852	73.49	158.34	0.063336
0.79856	86.5	158.16	0.0632642
0.7986	61.67	157.937	0.0631747
0.79864	-4.889	157.672	0.0630687
0.79868	-13.62	157.368	0.0629471
0.79872	-58.99	157.028	0.062811
0.79876	-56.3	156.654	0.0626614
0.7988	-20.03	156.248	0.0624993
0.79884	10.51	155.814	0.0623255
0.79888	65.75	155.353	0.0621411
0.79892	94.47	154.867	0.0619468
0.79896	112	154.359	0.0617435
0.799	99.94	153.83	0.0615322
0.79904	97.33	153.284	0.0613136
0.79908	17.48	152.721	0.0610885
0.79912	-54.14	152.145	0.0608579
0.79916	-36.39	151.556	0.0606225
0.7992	-56.85	150.958	0.0603831
0.79924	-79.4	150.351	0.0601405
0.79928	-55.67	149.738	0.0598953
0.79932	-57.87	149.121	0.0596482
0.79936	-75.26	148.5	0.0593999
0.7994	-33.07	147.877	0.059151
0.79944	-11.91	147.255	0.058902
0.79948	42.28	146.634	0.0586536
0.79952	78.49	146.015	0.0584062
0.79956	85.37	145.401	0.0581603
0.7996	79.53	144.791	0.0579165
0.79964	28.78	144.188	0.0576752
0.79968	19.1	143.592	0.0574369
0.79972	-6.855	143.005	0.057202
0.79976	-59.66	142.428	0.056971
0.7998	-19.63	141.861	0.0567443
0.79984	29.21	141.306	0.0565223
0.79988	60.28	140.763	0.0563053
0.79992	54.91	140.234	0.0560936
0.79996	103	139.719	0.0558877
0.8	108.7	139.219	0.0556877
0.80004	101.1	138.735	0.055494
0.80008	93.03	138.267	0.055307
0.80012	75.51	137.817	0.0551268
0.80016	62.1	137.385	0.0549538
0.8002	36.99	136.971	0.0547883
0.80024	40.31	136.576	0.0546304
0.80028	70.02	136.201	0.0544806
0.80032	2.163	135.847	0.0543389
0.80036	-35.03	135.514	0.0542056
0.8004	27.86	135.202	0.0540809
0.80044	61.27	134.913	0.053965
0.80048	27.8	134.645	0.0538581
0.80052	42.45	134.4	0.0537602
0.80056	67.68	134.179	0.0536715
0.8006	54.56	133.98	0.0535922
0.80064	17.13	133.806	0.0535223
0.80068	29.97	133.655	0.0534619
0.80072	27.1	133.528	0.053411
0.80076	53.06	133.425	0.0533698
0.8008	37.19	133.346	0.0533383
0.80084	7.22	133.291	0.0533165
0.80088	13.93	133.261	0.0533043
0.80092	3.463	133.255	0.0533019
0.80096	-33.47	133.273	0.0533091
0.801	-12.78	133.315	0.0533259
0.80104	29.07	133.381	0.0533523
0.80108	24.27	133.47	0.053388
0.80112	67.42	133.583	0.0534331
0.80116	54.7	133.718	0.0534874
0.8012	27.91	133.877	0.0535507
0.80124	27.97	134.057	0.0536228
0.80128	1.353	134.259	0.0537037
0.80132	-33.56	134.483	0.053793
0.80136	-5.063	134.727	0.0538906
0.8014	36.76	134.991	0.0539963
0.80144	28.69	135.274	0.0541098
0.80148	77.57	135.577	0.0542307
0.80152	95.22	135.897	0.0543589
0.80156	86.06	136.235	0.054494
0.8016	64.96	136.589	0.0546357
0.80164	79.07	136.959	0.0547836
0.80168	90.02	137.344	0.0549375
0.80172	84.47	137.743	0.055097
0.80176	62.48	138.154	0.0552618
0.8018	62.02	138.579	0.0554314
0.80184	48.72	139.014	0.0556056
0.80188	20.14	139.46	0.055784
0.80192	27.28	139.915	0.0559661
0.80196	31.06	140.379	0.0561515
0.802	49.36	140.85	0.0563399
0.80204	76.58	141.327	0.0565307
0.80208	171.5	141.809	0.0567235
0.80212	284.9	142.295	0.0569178
0.80216	326.2	142.783	0.0571132
0.8022	414	143.273	0.0573093
0.80224	425.1	143.764	0.0575055
0.80228	408.3	144.254	0.0577016
0.80232	395.4	144.743	0.0578972
0.80236	350.1	145.23	0.058092
0.8024	271	145.715	0.0582858
0.80244	248.8	146.196	0.0584784
0.80248	236.2	146.674	0.0586695
0.80252	207.2	147.147	0.058859
0.80256	289.1	147.617	0.0590467
0.8026	288.3	148.081	0.0592325
0.80264	243.4	148.54	0.0594161
0.80268	255.1	148.994	0.0595977
0.80272	247.4	149.442	0.0597769
0.80276	263.5	149.884	0.0599538
0.8028	293.2	150.321	0.0601282
0.80284	377.5	150.751	0.0603003
0.80288	408.8	151.174	0.0604698
0.80292	445.1	151.592	0.0606369
0.80296	485.1	152.004	0.0608016
0.803	450.6	152.41	0.060964
0.80304	438.1	152.811	0.0611243
0.80308	399.9	153.207	0.0612827
0.80312	345.9	153.598	0.0614393
0.80316	291.7	153.987	0.0615946
0.8032	243.3	154.372	0.0617488
0.80324	137.8	154.756	0.0619023
0.80328	78.29	155.138	0.0620553
0.80332	41.27	155.521	0.0622083
0.80336	-21.59	155.904	0.0623617
0.8034	-25.15	156.289	0.0625156
0.80344	-10.53	156.676	0.0626704
0.80348	21.84	157.066	0.0628264
0.80352	64.96	157.459	0.0629838
0.80356	101.7	157.857	0.0631428
0.8036	119.2	158.259	0.0633037
0.80364	116.5	158.666	0.0634666
0.80368	116.7	159.079	0.0636317
0.80372	105.3	159.498	0.0637992
0.80376	78.92	159.923	0.0639693
0.8038	51.73	160.355	0.0641422
0.80384	-22.46	160.795	0.0643179
0.80388	-71.28	161.242	0.0644966
0.80392	-40.73	161.696	0.0646785
0.80396	-11.05	162.159	0.0648635
0.804	67.57	162.629	0.0650518
0.80404	170.2	163.108	0.0652433
0.80408	266.5	163.595	0.065438
0.80412	319	164.09	0.065636
0.80416	313.1	164.593	0.0658373
0.8042	259.2	165.105	0.0660418
0.80424	151.6	165.624	0.0662497
0.80428	97.85	166.153	0.066461
0.80432	32.08	166.69	0.0666758
0.80436	-4.138	167.235	0.0668942
0.8044	22.48	167.79	0.0671161
0.80444	-15.58	168.354	0.0673416
0.80448	-10.76	168.927	0.0675706
0.80452	12.1	169.508	0.0678033
0.80456	24.91	170.098	0.0680393
0.8046	36.9	170.697	0.0682788
0.80464	94.7	171.304	0.0685215
0.80468	131.5	171.918	0.0687674
0.80472	171.4	172.54	0.0690162
0.80476	182.7	173.17	0.0692678
0.8048	123.4	173.805	0.0695222
0.80484	49.97	174.447	0.069779
0.80488	-15.99	175.095	0.0700381
0.80492	-82.63	175.749	0.0702994
0.80496	-46.74	176.407	0.0705627
0.805	-25.26	177.069	0.0708276
0.80504	10.17	177.735	0.0710939
0.80508	98.81	178.403	0.0713613
0.80512	112.7	179.073	0.0716293
0.80516	65.37	179.744	0.0718978
0.8052	177.2	180.416	0.0721662
0.80524	277.2	181.086	0.0724342
0.80528	259.3	181.754	0.0727015
0.80532	366.8	182.419	0.0729676
0.80536	549.1	183.08	0.0732321
0.8054	624.9	183.737	0.0734949
0.80544	635.9	184.389	0.0737555
0.80548	626.1	185.034	0.0740138
0.80552	584.1	185.674	0.0742696
0.80556	575.6	186.307	0.074523
0.8056	412.3	186.934	0.0747738
0.80564	310.2	187.555	0.0750221
0.80568	325.2	188.17	0.0752681
0.80572	298.8	188.779	0.0755118
0.80576	245.9	189.383	0.0757534
0.8058	256.7	189.982	0.075993
0.80584	230.1	190.577	0.0762308
0.80588	212.4	191.167	0.076467
0.80592	172.7	191.754	0.0767017
0.80596	240	192.338	0.0769351
0.806	266.5	192.919	0.0771675
0.80604	241	193.498	0.077399
0.80608	255.5	194.075	0.0776298
0.80612	316	194.65	0.0778602
0.80616	341.4	195.226	0.0780903
0.8062	344.7	195.801	0.0783203
0.80624	316	196.377	0.0785507
0.80628	262.4	196.954	0.0787816
0.80632	222.8	197.533	0.0790133
0.80636	180.4	198.115	0.0792462
0.8064	83.4	198.701	0.0794805
0.80644	-2.606	199.292	0.0797166
0.80648	-46.1	199.887	0.0799548
0.80652	-88.91	200.488	0.0801954
0.80656	-96.74	201.096	0.0804385
0.8066	-110.4	201.711	0.0806843
0.80664	-53.47	202.333	0.080933
0.80668	29.88	202.962	0.0811847
0.80672	124	203.598	0.0814394
0.80676	166.8	204.243	0.0816971
0.8068	210.9	204.895	0.0819578
0.80684	200.1	205.554	0.0822216
0.80688	153	206.221	0.0824884
0.80692	147.7	206.896	0.0827583
0.80696	80.98	207.578	0.0830312
0.807	30.37	208.268	0.083307
0.80704	-0.5253	208.965	0.0835858
0.80708	-63.01	209.669	0.0838675
0.80712	-64.69	210.38	0.0841519
0.80716	-41.04	211.097	0.084439
0.8072	-8.964	211.821	0.0847284
0.80724	65.25	212.55	0.0850201
0.80728	137.6	213.284	0.0853137
0.80732	236.5	214.023	0.085609
0.80736	316.1	214.764	0.0859056
0.8074	413.7	215.508	0.0862033
0.80744	490.8	216.255	0.0865018
0.80748	561.3	217.002	0.0868008
0.80752	568.9	217.751	0.0871002
0.80756	583.1	218.5	0.0873998
0.8076	516.7	219.249	0.0876995
0.80764	457.6	219.998	0.0879992
0.80768	383.6	220.748	0.088299
0.80772	292.3	221.497	0.0885989
0.80776	238.6	222.248	0.088899
0.8078	138.8	222.998	0.0891994
0.80784	62.05	223.75	0.0895
0.80788	21.82	224.503	0.0898011
0.80792	6.064	225.257	0.0901026
0.80796	-30.67	226.012	0.0904046
0.808	6.324	226.768	0.090707
0.80804	81.41	227.525	0.0910098
0.80808	154.6	228.282	0.091313
0.80812	200.3	229.041	0.0916162
0.80816	274.5	229.799	0.0919196
0.8082	313.8	230.557	0.0922229
0.80824	350	231.315	0.0925259
0.80828	387.6	232.072	0.0928287
0.80832	434.9	232.828	0.0931311
0.80836	473.9	233.582	0.093433
0.8084	506.1	234.336	0.0937344
0.80844	531.8	235.088	0.0940353
0.80848	472.9	235.839	0.0943357
0.80852	417.1	236.589	0.0946358
0.80856	310.5	237.339	0.0949356
0.8086	198.3	238.088	0.0952354
0.80864	94.91	238.838	0.0955352
0.80868	23.29	239.588	0.0958352
0.80872	-18.88	240.339	0.0961356
0.80876	-69.63	241.091	0.0964364
0.8088	-70.81	241.844	0.0967378
0.80884	-60.26	242.599	0.0970396
0.80888	-33.33	243.355	0.097342
0.80892	13.35	244.112	0.0976448
0.80896	92.88	244.87	0.0979479
0.809	159.5	245.628	0.0982511
0.80904	196.6	246.386	0.0985543
0.80908	217.9	247.143	0.0988572
0.80912	179.7	247.899	0.0991597
0.80916	167.8	248.654	0.0994615
0.8092	99.82	249.406	0.0997623
0.80924	8.203	250.155	0.100062
0.80928	-6.103	250.901	0.10036
0.80932	61.35	251.642	0.100657
0.80936	157.8	252.379	0.100951
0.8094	283.9	253.109	0.101244
0.80944	436.5	253.832	0.101533
0.80948	532.6	254.547	0.101819
0.80952	597	255.254	0.102102
0.80956	627.2	255.951	0.10238
0.8096	571	256.637	0.102655
0.80964	472.6	257.313	0.102925
0.80968	348	257.978	0.103191
0.80972	250.6	258.632	0.103453
0.80976	153.3	259.274	0.103709
0.8098	108.7	259.903	0.103961
0.80984	69.91	260.521	0.104208
0.80988	108.3	261.126	0.104451
0.80992	143.2	261.718	0.104687
0.80996	144.3	262.297	0.104919
0.81	195.1	262.862	0.105145
0.81004	173.7	263.412	0.105365
0.81008	218.5	263.947	0.105579
0.81012	223.9	264.466	0.105786
0.81016	243.8	264.969	0.105987
0.8102	310.7	265.454	0.106182
0.81024	401.6	265.922	0.106369
0.81028	495.6	266.371	0.106548
0.81032	574.5	266.801	0.10672
0.81036	637.7	267.212	0.106885
0.8104	706.1	267.602	0.107041
0.81044	750.3	267.973	0.107189
0.81048	771	268.323	0.107329
0.81052	749.3	268.653	0.107461
0.81056	684.8	268.963	0.107585
0.8106	609.8	269.254	0.107702
0.81064	483.8	269.526	0.10781
0.81068	390.8	269.78	0.107912
0.81072	208.1	270.018	0.108007
0.81076	95.86	270.239	0.108096
0.8108	6.498	270.445	0.108178
0.81084	-37.61	270.636	0.108255
0.81088	-79.17	270.814	0.108326
0.81092	-83.73	270.979	0.108392
0.81096	-32.98	271.132	0.108453
0.811	8.261	271.272	0.108509
0.81104	71.47	271.4	0.10856
0.81108	163.8	271.517	0.108607
0.81112	254.2	271.621	0.108648
0.81116	312.8	271.714	0.108686
0.8112	407	271.795	0.108718
0.81124	491.2	271.864	0.108746
0.81128	524.9	271.922	0.108769
0.81132	538.8	271.968	0.108787
0.81136	536.5	272.003	0.108801
0.8114	539.5	272.026	0.108811
0.81144	482.7	272.04	0.108816
0.81148	415.7	272.043	0.108817
0.81152	363.9	272.037	0.108815
0.81156	287.2	272.023	0.108809
0.8116	196.4	272	0.1088
0.81164	114.6	271.971	0.108788
0.81168	54.27	271.935	0.108774
0.81172	34.21	271.893	0.108757
0.81176	3.723	271.846	0.108738
0.8118	5.226	271.794	0.108717
0.81184	44.16	271.737	0.108695
0.81188	75.66	271.677	0.108671
0.81192	120.3	271.612	0.108645
0.81196	163.1	271.544	0.108618
0.812	202.8	271.472	0.108589
0.81204	282.8	271.395	0.108558
0.81208	353.3	271.315	0.108526
0.81212	452	271.232	0.108493
0.81216	530.9	271.144	0.108457
0.8122	572.6	271.052	0.108421
0.81224	625.6	270.957	0.108383
0.81228	587.9	270.858	0.108343
0.81232	551.5	270.757	0.108303
0.81236	470.7	270.653	0.108261
0.8124	397	270.547	0.108219
0.81244	312.4	270.441	0.108176
0.81248	237.7	270.334	0.108134
0.81252	176.3	270.228	0.108091
0.81256	137.7	270.123	0.108049
0.8126	83.98	270.021	0.108008
0.81264	76.27	269.921	0.107968
0.81268	71.61	269.825	0.10793
0.81272	103.7	269.733	0.107893
0.81276	105.5	269.646	0.107858
0.8128	109.7	269.563	0.107825
0.81284	108	269.486	0.107794
0.81288	110.6	269.415	0.107766
0.81292	123	269.349	0.10774
0.81296	143.5	269.29	0.107716
0.813	250	269.236	0.107694
0.81304	330.7	269.189	0.107676
0.81308	389	269.148	0.107659
0.81312	473.1	269.113	0.107645
0.81316	493.1	269.085	0.107634
0.8132	459.5	269.064	0.107626
0.81324	428.1	269.049	0.10762
0.81328	427.9	269.042	0.107617
0.81332	329.5	269.043	0.107617
0.81336	286.3	269.052	0.107621
0.8134	277	269.069	0.107628
0.81344	281.4	269.096	0.107638
0.81348	263.1	269.132	0.107653
0.81352	234.9	269.179	0.107672
0.81356	226.1	269.237	0.107695
0.8136	193.5	269.306	0.107722
0.81364	199	269.387	0.107755
0.81368	168.6	269.48	0.107792
0.81372	190.8	269.585	0.107834
0.81376	234.1	269.704	0.107882
0.8138	248.2	269.837	0.107935
0.81384	284.2	269.983	0.107993
0.81388	333.2	270.144	0.108057
0.81392	342.4	270.319	0.108127
0.81396	336.3	270.509	0.108203
0.814	340.5	270.714	0.108286
0.81404	338.5	270.935	0.108374
0.81408	333.1	271.172	0.108469
0.81412	359.3	271.426	0.108571
0.81416	349	271.698	0.108679
0.8142	310.4	271.987	0.108795
0.81424	280.6	272.294	0.108918
0.81428	232.5	272.62	0.109048
0.81432	196.5	272.966	0.109186
0.81436	120.5	273.332	0.109333
0.8144	54.76	273.718	0.109487
0.81444	44.39	274.126	0.10965
0.81448	32.48	274.555	0.109822
0.81452	35.49	275.005	0.110002
0.81456	83.52	275.478	0.110191
0.8146	132.1	275.973	0.110389
0.81464	143.3	276.49	0.110596
0.81468	179.4	277.029	0.110812
0.81472	233	277.59	0.111036
0.81476	261.5	278.173	0.111269
0.8148	280.3	278.778	0.111511
0.81484	322.4	279.405	0.111762
0.81488	350.9	280.054	0.112021
0.81492	375.9	280.723	0.112289
0.81496	419.6	281.415	0.112566
0.815	439.5	282.127	0.112851
0.81504	436.6	282.861	0.113144
0.81508	448.9	283.616	0.113447
0.81512	423.9	284.393	0.113757
0.81516	361.7	285.192	0.114077
0.8152	289.9	286.013	0.114405
0.81524	267.4	286.855	0.114742
0.81528	225.3	287.721	0.115088
0.81532	172.9	288.609	0.115444
0.81536	159.7	289.52	0.115808
0.8154	150.1	290.455	0.116182
0.81544	135.9	291.412	0.116565
0.81548	100.5	292.394	0.116957
0.81552	121.7	293.398	0.117359
0.81556	162.4	294.426	0.117771
0.8156	210.2	295.478	0.118191
0.81564	213.9	296.552	0.118621
0.81568	248.7	297.65	0.11906
0.81572	291.5	298.771	0.119508
0.81576	356	299.913	0.119965
0.8158	333.3	301.079	0.120431
0.81584	407.5	302.266	0.120906
0.81588	431.7	303.475	0.12139
0.81592	412.8	304.706	0.121882
0.81596	404.3	305.958	0.122383
0.816	402.3	307.232	0.122893
0.81604	418.7	308.527	0.123411
0.81608	373.6	309.843	0.123937
0.81612	334.5	311.181	0.124472
0.81616	337.4	312.54	0.125016
0.8162	263.5	313.921	0.125568
0.81624	195.9	315.324	0.126129
0.81628	184.7	316.748	0.126699
0.81632	167.4	318.194	0.127278
0.81636	158.7	319.661	0.127865
0.8164	142.8	321.15	0.12846
0.81644	157.5	322.661	0.129064
0.81648	147.7	324.192	0.129677
0.81652	226	325.745	0.130298
0.81656	190	327.317	0.130927
0.8166	221.5	328.91	0.131564
0.81664	227.6	330.523	0.132209
0.81668	249.3	332.154	0.132862
0.81672	298.7	333.805	0.133522
0.81676	249.8	335.473	0.134189
0.8168	245.1	337.158	0.134863
0.81684	249.5	338.86	0.135544
0.81688	239.3	340.579	0.136232
0.81692	304.7	342.312	0.136925
0.81696	344.2	344.061	0.137624
0.817	366.2	345.823	0.138329
0.81704	403.4	347.598	0.139039
0.81708	389.9	349.386	0.139754
0.81712	452.1	351.186	0.140474
0.81716	470.6	352.996	0.141198
0.8172	480.1	354.817	0.141927
0.81724	464.9	356.647	0.142659
0.81728	402.3	358.486	0.143395
0.81732	373.7	360.334	0.144134
0.81736	342.2	362.191	0.144876
0.8174	345.7	364.054	0.145622
0.81744	341.9	365.925	0.14637
0.81748	332.8	367.802	0.147121
0.81752	370.1	369.685	0.147874
0.81756	391.6	371.573	0.148629
0.8176	389.1	373.466	0.149387
0.81764	405.4	375.364	0.150146
0.81768	433.1	377.265	0.150906
0.81772	465.8	379.17	0.151668
0.81776	495.3	381.077	0.152431
0.8178	517.5	382.987	0.153195
0.81784	540.4	384.899	0.15396
0.81788	562.9	386.812	0.154725
0.81792	573.6	388.727	0.155491
0.81796	549.9	390.642	0.156257
0.818	533.9	392.559	0.157023
0.81804	514.1	394.476	0.15779
0.81808	487.7	396.394	0.158557
0.81812	415.8	398.312	0.159325
0.81816	360.4	400.231	0.160093
0.8182	314.6	402.152	0.160861
0.81824	288.5	404.073	0.161629
0.81828	252.9	405.994	0.162398
0.81832	183.7	407.917	0.163167
0.81836	197.3	409.84	0.163936
0.8184	179.1	411.764	0.164706
0.81844	198	413.688	0.165475
0.81848	271.7	415.611	0.166244
0.81852	334.8	417.534	0.167014
0.81856	379.5	419.456	0.167782
0.8186	434.6	421.376	0.16855
0.81864	478	423.294	0.169318
0.81868	536.6	425.209	0.170084
0.81872	604.5	427.121	0.170848
0.81876	639.5	429.029	0.171612
0.8188	656.3	430.933	0.172373
0.81884	683.2	432.832	0.173133
0.81888	678.6	434.727	0.173891
0.81892	642.9	436.616	0.174646
0.81896	602.2	438.501	0.1754
0.819	580.2	440.38	0.176152
0.81904	553.1	442.255	0.176902
0.81908	552.4	444.125	0.17765
0.81912	516.9	445.99	0.178396
0.81916	481	447.851	0.17914
0.8192	456.7	449.708	0.179883
0.81924	433.4	451.561	0.180625
0.81928	423.7	453.411	0.181364
0.81932	427.2	455.258	0.182103
0.81936	433.7	457.101	0.18284
0.8194	442.6	458.942	0.183577
0.81944	474.6	460.78	0.184312
0.81948	471.9	462.616	0.185047
0.81952	480	464.451	0.18578
0.81956	465.1	466.283	0.186513
0.8196	481.3	468.114	0.187246
0.81964	472.1	469.944	0.187977
0.81968	499.8	471.772	0.188709
0.81972	469.5	473.601	0.18944
0.81976	441.9	475.428	0.190171
0.8198	418.6	477.256	0.190902
0.81984	403.9	479.083	0.191633
0.81988	406.7	480.911	0.192364
0.81992	386.8	482.739	0.193096
0.81996	365.7	484.568	0.193827
0.82	387.6	486.398	0.194559
0.82004	395.8	488.229	0.195291
0.82008	408.5	490.06	0.196024
0.82012	419.7	491.893	0.196757
0.82016	413.7	493.726	0.197491
0.8202	448.1	495.561	0.198224
0.82024	455.4	497.396	0.198958
0.82028	467.6	499.232	0.199693
0.82032	447.5	501.068	0.200427
0.82036	480.6	502.905	0.201162
0.8204	491.7	504.742	0.201897
0.82044	513.1	506.579	0.202632
0.82048	506.5	508.417	0.203367
0.82052	540.4	510.254	0.204101
0.82056	525.2	512.09	0.204836
0.8206	535.3	513.926	0.205571
0.82064	514.8	515.762	0.206305
0.82068	537.2	517.597	0.207039
0.82072	517.6	519.43	0.207772
0.82076	509.9	521.263	0.208505
0.8208	518.7	523.095	0.209238
0.82084	502.8	524.925	0.20997
0.82088	501.7	526.753	0.210701
0.82092	486.6	528.58	0.211432
0.82096	501.8	530.405	0.212162
0.821	522.4	532.229	0.212891
0.82104	533.8	534.05	0.21362
0.82108	544	535.868	0.214347
0.82112	544.4	537.685	0.215074
0.82116	551.9	539.498	0.215799
0.8212	540.1	541.308	0.216523
0.82124	544.4	543.116	0.217246
0.82128	546.8	544.92	0.217968
0.82132	532.5	546.721	0.218688
0.82136	527.5	548.518	0.219407
0.8214	513.5	550.311	0.220124
0.82144	539.2	552.1	0.22084
0.82148	537.4	553.885	0.221554
0.82152	555.2	555.666	0.222266
0.82156	565.2	557.442	0.222977
0.8216	579.8	559.213	0.223685
0.82164	570	560.979	0.224391
0.82168	580.6	562.739	0.225096
0.82172	585	564.495	0.225798
0.82176	639.6	566.244	0.226498
0.8218	636	567.988	0.227195
0.82184	639.9	569.725	0.22789
0.82188	652.7	571.457	0.228583
0.82192	643.7	573.182	0.229273
0.82196	650.4	574.901	0.22996
0.822	662.4	576.613	0.230645
0.82204	637.1	578.319	0.231328
0.82208	637	580.019	0.232007
0.82212	632.1	581.712	0.232685
0.82216	625.7	583.399	0.23336
0.8222	634.4	585.08	0.234032
0.82224	604.6	586.755	0.234702
0.82228	617.5	588.423	0.235369
0.82232	609	590.086	0.236035
0.82236	614.3	591.743	0.236697
0.8224	625.4	593.395	0.237358
0.82244	647.9	595.041	0.238017
0.82248	659.4	596.682	0.238673
0.82252	664.1	598.319	0.239327
0.82256	679.1	599.95	0.23998
0.8226	672	601.576	0.240631
0.82264	673.1	603.199	0.24128
0.82268	660.4	604.817	0.241927
0.82272	637.3	606.432	0.242573
0.82276	617.6	608.043	0.243217
0.8228	603	609.652	0.243861
0.82284	589.7	611.258	0.244503
0.82288	571	612.861	0.245145
0.82292	560.4	614.463	0.245785
0.82296	558.6	616.063	0.246425
0.823	552.8	617.662	0.247065
0.82304	572.8	619.261	0.247704
0.82308	555	620.858	0.248343
0.82312	576.6	622.455	0.248982
0.82316	580.6	624.052	0.249621
0.8232	581.1	625.649	0.25026
0.82324	587.8	627.246	0.250899
0.82328	568.1	628.844	0.251538
0.82332	584.9	630.442	0.252177
0.82336	614.4	632.041	0.252816
0.8234	614.8	633.641	0.253456
0.82344	609.2	635.241	0.254097
0.82348	602.9	636.843	0.254737
0.82352	618	638.446	0.255378
0.82356	603.4	640.05	0.25602
0.8236	606.4	641.655	0.256662
0.82364	600.3	643.261	0.257304
0.82368	594	644.869	0.257948
0.82372	587.6	646.478	0.258591
0.82376	590.6	648.089	0.259235
0.8238	612.4	649.7	0.25988
0.82384	596.3	651.314	0.260525
0.82388	617.1	652.928	0.261171
0.82392	617.5	654.543	0.261817
0.82396	632	656.16	0.262464
0.824	662.5	657.777	0.263111
0.82404	674	659.396	0.263758
0.82408	711	661.015	0.264406
0.82412	743.1	662.635	0.265054
0.82416	738	664.255	0.265702
0.8242	737.4	665.875	0.26635
0.82424	739.1	667.496	0.266999
0.82428	730.2	669.118	0.267647
0.82432	738.2	670.74	0.268296
0.82436	729.4	672.362	0.268945
0.8244	707.2	673.985	0.269594
0.82444	691.9	675.609	0.270244
0.82448	666.5	677.233	0.270893
0.82452	642.8	678.859	0.271543
0.82456	631.9	680.485	0.272194
0.8246	606.7	682.112	0.272845
0.82464	620.5	683.741	0.273496
0.82468	600	685.371	0.274148
0.82472	610.4	687.002	0.274801
0.82476	592.4	688.634	0.275454
0.8248	597.4	690.267	0.276107
0.82484	621	691.902	0.276761
0.82488	638.6	693.537	0.277415
0.82492	633.5	695.174	0.27807
0.82496	647.2	696.811	0.278724
0.825	678.6	698.449	0.279379
0.82504	699.6	700.087	0.280035
0.82508	721.5	701.725	0.28069
0.82512	712.9	703.363	0.281345
0.82516	690.7	705	0.282
0.8252	702	706.637	0.282655
0.82524	753.9	708.274	0.28331
0.82528	719.8	709.909	0.283964
0.82532	672.3	711.543	0.284617
0.82536	667	713.176	0.285271
0.8254	696.8	714.808	0.285923
0.82544	701.3	716.437	0.286575
0.82548	684.4	718.065	0.287226
0.82552	642.3	719.69	0.287876
0.82556	666.6	721.313	0.288525
0.8256	713.5	722.933	0.289173
0.82564	725.9	724.55	0.28982
0.82568	725.9	726.163	0.290465
0.82572	698	727.773	0.291109
0.82576	722.8	729.379	0.291751
0.8258	750.2	730.98	0.292392
0.82584	735.8	732.577	0.293031
0.82588	725.4	734.169	0.293667
0.82592	791.6	735.755	0.294302
0.82596	754.1	737.336	0.294934
0.826	767	738.911	0.295564
0.82604	772.9	740.48	0.296192
0.82608	783.9	742.042	0.296817
0.82612	787.4	743.598	0.297439
0.82616	790.6	745.147	0.298059
0.8262	824.3	746.688	0.298675
0.82624	827.9	748.223	0.299289
0.82628	800.9	749.749	0.2999
0.82632	769.7	751.268	0.300507
0.82636	784.1	752.779	0.301112
0.8264	816	754.282	0.301713
0.82644	800.2	755.777	0.302311
0.82648	830.7	757.263	0.302905
0.82652	800.6	758.742	0.303497
0.82656	771	760.212	0.304085
0.8266	786.2	761.674	0.30467
0.82664	768.8	763.128	0.305251
0.82668	759.5	764.573	0.305829
0.82672	748.3	766.01	0.306404
0.82676	727.9	767.438	0.306975
0.8268	744.8	768.859	0.307543
0.82684	743.1	770.27	0.308108
0.82688	749.1	771.674	0.30867
0.82692	717.5	773.069	0.309227
0.82696	732.7	774.455	0.309782
0.827	757.2	775.833	0.310333
0.82704	750.4	777.202	0.310881
0.82708	749.7	778.562	0.311425
0.82712	778.9	779.913	0.311965
0.82716	766.4	781.256	0.312502
0.8272	780.1	782.589	0.313035
0.82724	780.6	783.912	0.313565
0.82728	793.7	785.227	0.314091
0.82732	816.6	786.531	0.314613
0.82736	795.8	787.826	0.315131
0.8274	835.5	789.111	0.315645
0.82744	800	790.387	0.316155
0.82748	829.8	791.652	0.316661
0.82752	853.2	792.907	0.317163
0.82756	860.8	794.152	0.317661
0.8276	860.5	795.386	0.318154
0.82764	800.7	796.61	0.318644
0.82768	856.5	797.824	0.31913
0.82772	831.4	799.028	0.319611
0.82776	823	800.221	0.320088
0.8278	824.2	801.404	0.320562
0.82784	810.4	802.577	0.321031
0.82788	812	803.74	0.321496
0.82792	811.7	804.892	0.321957
0.82796	822.2	806.035	0.322414
0.828	832.1	807.167	0.322867
0.82804	852.5	808.29	0.323316
0.82808	850.6	809.403	0.323761
0.82812	853.1	810.506	0.324202
0.82816	817.9	811.599	0.32464
0.8282	825.8	812.683	0.325073
0.82824	824.2	813.758	0.325503
0.82828	831	814.823	0.325929
0.82832	820.6	815.879	0.326352
0.82836	830.4	816.927	0.326771
0.8284	844.3	817.965	0.327186
0.82844	810.6	818.995	0.327598
0.82848	832.9	820.017	0.328007
0.82852	802.7	821.03	0.328412
0.82856	813.2	822.035	0.328814
0.8286	794.9	823.032	0.329213
0.82864	814.9	824.021	0.329608
0.82868	796.3	825.002	0.330001
0.82872	769.2	825.976	0.330391
0.82876	780.8	826.943	0.330777
0.8288	753	827.902	0.331161
0.82884	790.8	828.854	0.331542
0.82888	761.1	829.799	0.33192
0.82892	752.1	830.737	0.332295
0.82896	775.8	831.668	0.332667
0.829	790.6	832.591	0.333036
0.82904	804.3	833.507	0.333403
0.82908	807.3	834.417	0.333767
0.82912	835.9	835.319	0.334127
0.82916	844.6	836.213	0.334485
0.8292	854.5	837.1	0.33484
0.82924	856.3	837.98	0.335192
0.82928	862.4	838.852	0.335541
0.82932	907.2	839.717	0.335887
0.82936	879.5	840.574	0.336229
0.8294	890.8	841.423	0.336569
0.82944	899.8	842.264	0.336906
0.82948	903.7	843.098	0.337239
0.82952	879.5	843.924	0.33757
0.82956	911.2	844.743	0.337897
0.8296	865.1	845.554	0.338222
0.82964	861.4	846.358	0.338543
0.82968	852	847.155	0.338862
0.82972	812.3	847.944	0.339178
0.82976	790.6	848.726	0.33949
0.8298	769.8	849.501	0.339801
0.82984	780.2	850.27	0.340108
0.82988	749.8	851.031	0.340413
0.82992	746.5	851.786	0.340714
0.82996	743.4	852.534	0.341014
0.83	756.7	853.275	0.34131
0.83004	791	854.009	0.341604
0.83008	797.5	854.736	0.341894
0.83012	823.1	855.455	0.342182
0.83016	830.7	856.167	0.342467
0.8302	832.9	856.871	0.342748
0.83024	867.3	857.567	0.343027
0.83028	880.6	858.255	0.343302
0.83032	873.4	858.935	0.343574
0.83036	880.2	859.606	0.343842
0.8304	882.1	860.268	0.344107
0.83044	892.9	860.922	0.344369
0.83048	911.9	861.566	0.344626
0.83052	891.6	862.2	0.34488
0.83056	905.3	862.826	0.34513
0.8306	912.3	863.441	0.345376
0.83064	896.5	864.047	0.345619
0.83068	901.1	864.643	0.345857
0.83072	917.7	865.229	0.346091
0.83076	864.8	865.804	0.346322
0.8308	873.8	866.37	0.346548
0.83084	911.1	866.925	0.34677
0.83088	900.7	867.47	0.346988
0.83092	896.9	868.005	0.347202
0.83096	892.3	868.53	0.347412
0.831	885.6	869.044	0.347618
0.83104	913.8	869.548	0.347819
0.83108	909.2	870.041	0.348016
0.83112	908.6	870.524	0.34821
0.83116	903.9	870.997	0.348399
0.8312	879	871.459	0.348584
0.83124	871.1	871.912	0.348765
0.83128	872.8	872.354	0.348941
0.83132	830.4	872.786	0.349114
0.83136	832.1	873.208	0.349283
0.8314	824.9	873.62	0.349448
0.83144	826.8	874.022	0.349609
0.83148	833.9	874.414	0.349766
0.83152	832.6	874.796	0.349919
0.83156	847.1	875.169	0.350068
0.8316	869.1	875.531	0.350212
0.83164	877.4	875.883	0.350353
0.83168	861.7	876.225	0.35049
0.83172	852.2	876.557	0.350623
0.83176	856.2	876.879	0.350752
0.8318	861.7	877.191	0.350876
0.83184	861.5	877.492	0.350997
0.83188	877.9	877.783	0.351113
0.83192	900	878.063	0.351225
0.83196	904.6	878.332	0.351333
0.832	903.6	878.591	0.351436
0.83204	913.8	878.839	0.351536
0.83208	903.9	879.076	0.351631
0.83212	907.8	879.303	0.351721
0.83216	916.8	879.518	0.351807
0.8322	919.1	879.723	0.351889
0.83224	913.1	879.916	0.351967
0.83228	901.8	880.099	0.35204
0.83232	896.9	880.271	0.352108
0.83236	890.1	880.432	0.352173
0.8324	904	880.581	0.352233
0.83244	908.8	880.721	0.352288
0.83248	897.1	880.849	0.35234
0.83252	888.2	880.967	0.352387
0.83256	908.9	881.073	0.352429
0.8326	899.2	881.17	0.352468
0.83264	882.5	881.256	0.352502
0.83268	873.9	881.331	0.352532
0.83272	854	881.396	0.352558
0.83276	828.3	881.451	0.35258
0.8328	827.1	881.495	0.352598
0.83284	830	881.53	0.352612
0.83288	812.4	881.554	0.352622
0.83292	803.1	881.568	0.352627
0.83296	807.3	881.572	0.352629
0.833	819	881.566	0.352627
0.83304	830.6	881.55	0.35262
0.83308	852.6	881.523	0.352609
0.83312	864.5	881.486	0.352594
0.83316	885.4	881.438	0.352575
0.8332	888.8	881.379	0.352552
0.83324	899.1	881.31	0.352524
0.83328	921.2	881.229	0.352492
0.83332	952.5	881.137	0.352455
0.83336	952.9	881.034	0.352414
0.8334	952.4	880.92	0.352368
0.83344	975	880.794	0.352318
0.83348	965.8	880.657	0.352263
0.83352	962.3	880.508	0.352203
0.83356	953.8	880.348	0.352139
0.8336	941.9	880.177	0.352071
0.83364	933.8	879.994	0.351998
0.83368	898.9	879.8	0.35192
0.83372	873.8	879.595	0.351838
0.83376	858.2	879.38	0.351752
0.8338	831	879.154	0.351661
0.83384	822.7	878.917	0.351567
0.83388	833.2	878.67	0.351468
0.83392	822.3	878.412	0.351365
0.83396	826.2	878.145	0.351258
0.834	807.5	877.867	0.351147
0.83404	798.9	877.579	0.351032
0.83408	823	877.281	0.350912
0.83412	828.5	876.973	0.350789
