# Supplementary material for: Shear Thickening Fluids in Cork Agglomerates: An Exploration of Advantages and Drawbacks
Source: Preprints.org preprint supplement (doi:10.20944/preprints202304.0004.v1), 2023-04-03
Supplement: Supplementary file 15 [file EN_x_30.xlsx]

## Sheet: data
Time - Voltage - Voltage	Amplitude - Voltage - Voltage
0	559
4e-05	562.5
8e-05	559.6
0.00012	562.9
0.00016	560.4
0.0002	562.5
0.00024	561.4
0.00028	561.4
0.00032	562.6
0.00036	560.2
0.0004	563.6
0.00044	558
0.00048	564.4
0.00052	556.7
0.00056	564.3
0.0006	555.9
0.00064	564.2
0.00068	555.4
0.00072	563.2
0.00076	555.9
0.0008	563
0.00084	556.4
0.00088	562.1
0.00092	557.4
0.00096	561.8
0.001	558
0.00104	562.2
0.00108	558.9
0.00112	562.2
0.00116	559.5
0.0012	562.8
0.00124	560.2
0.00128	562.6
0.00132	560.9
0.00136	562.3
0.0014	561.6
0.00144	561.3
0.00148	562.6
0.00152	560
0.00156	563.6
0.0016	558.5
0.00164	564.6
0.00168	557
0.00172	564.2
0.00176	556
0.0018	564
0.00184	555.6
0.00188	563.6
0.00192	556.2
0.00196	562.6
0.002	556.6
0.00204	562
0.00208	558
0.00212	561.9
0.00216	558.3
0.0022	561.8
0.00224	559
0.00228	562.3
0.00232	559.7
0.00236	562.8
0.0024	560.1
0.00244	562.7
0.00248	560.8
0.00252	562.1
0.00256	562.1
0.0026	561.4
0.00264	563
0.00268	559.6
0.00272	563.6
0.00276	558
0.0028	564.4
0.00284	556.6
0.00288	564.1
0.00292	555.7
0.00296	563.9
0.003	555.8
0.00304	563.3
0.00308	555.8
0.00312	563.1
0.00316	556.9
0.0032	562.6
0.00324	557.6
0.00328	561.9
0.00332	558.4
0.00336	561.9
0.0034	559.7
0.00344	562.6
0.00348	559.8
0.00352	563.2
0.00356	559.7
0.0036	563
0.00364	561
0.00368	562
0.00372	562.2
0.00376	560.8
0.0038	563.2
0.00384	559.7
0.00388	564.3
0.00392	557.6
0.00396	564.3
0.004	556.9
0.00404	564
0.00408	556.2
0.00412	563.7
0.00416	556
0.0042	563.2
0.00424	556.2
0.00428	562.5
0.00432	557.1
0.00436	562.2
0.0044	557.2
0.00444	562.1
0.00448	558.4
0.00452	562.6
0.00456	559.2
0.0046	562.6
0.00464	559.7
0.00468	562.9
0.00472	560.8
0.00476	562.8
0.0048	561.2
0.00484	561.8
0.00488	562.3
0.00492	560.6
0.00496	563.3
0.005	559.2
0.00504	563.7
0.00508	557.4
0.00512	565
0.00516	556.4
0.0052	564.6
0.00524	555.6
0.00528	563.3
0.00532	556
0.00536	563.1
0.0054	556.3
0.00544	562.6
0.00548	556.7
0.00552	562
0.00556	558.1
0.0056	562.7
0.00564	557.9
0.00568	562.2
0.00572	559.8
0.00576	563.1
0.0058	559.2
0.00584	563.2
0.00588	560.4
0.00592	562.9
0.00596	562.8
0.006	562
0.00604	562.4
0.00608	560.8
0.00612	563.5
0.00616	559.1
0.0062	564
0.00624	557.7
0.00628	564.4
0.00632	556.7
0.00636	564.3
0.0064	555.6
0.00644	563.6
0.00648	555.8
0.00652	562.8
0.00656	556.2
0.0066	562.6
0.00664	556.9
0.00668	562.4
0.00672	557.8
0.00676	561.8
0.0068	559.1
0.00684	562.4
0.00688	559.5
0.00692	562.7
0.00696	559.9
0.007	563.2
0.00704	560.5
0.00708	562.8
0.00712	561
0.00716	561.8
0.0072	562.2
0.00724	560.7
0.00728	563.1
0.00732	559.3
0.00736	564.3
0.0074	557.7
0.00744	564.7
0.00748	556.3
0.00752	564.4
0.00756	555.8
0.0076	563.6
0.00764	556.2
0.00768	563.2
0.00772	556.5
0.00776	562.6
0.0078	556.9
0.00784	562.1
0.00788	557.7
0.00792	562.4
0.00796	558.5
0.008	562.3
0.00804	559.5
0.00808	562.8
0.00812	560
0.00816	563
0.0082	560.4
0.00824	562.8
0.00828	561.5
0.00832	561.7
0.00836	562.8
0.0084	560.8
0.00844	563.4
0.00848	559.4
0.00852	564.2
0.00856	557.8
0.0086	564.6
0.00864	556.6
0.00868	564.2
0.00872	556.1
0.00876	564
0.0088	555.8
0.00884	563.2
0.00888	556.2
0.00892	562.6
0.00896	557
0.009	561.9
0.00904	558
0.00908	561.8
0.00912	559
0.00916	562.4
0.0092	559
0.00924	562.5
0.00928	559.1
0.00932	563
0.00936	560.4
0.0094	563
0.00944	560.8
0.00948	561.6
0.00952	562.6
0.00956	560.6
0.0096	563.6
0.00964	559.2
0.00968	564.3
0.00972	557.8
0.00976	564.6
0.0098	556.7
0.00984	564.8
0.00988	555.9
0.00992	563.8
0.00996	556
0.01	563
0.01004	557.1
0.01008	562.9
0.01012	556.9
0.01016	562.5
0.0102	558.1
0.01024	562.7
0.01028	558.6
0.01032	562.7
0.01036	559.5
0.0104	562.9
0.01044	559.9
0.01048	563.2
0.01052	561
0.01056	562.8
0.0106	561.1
0.01064	562.3
0.01068	562.4
0.01072	561.3
0.01076	563.6
0.0108	559.4
0.01084	564.3
0.01088	557.8
0.01092	565.1
0.01096	556.6
0.011	564.3
0.01104	556.1
0.01108	563.5
0.01112	556.2
0.01116	563.2
0.0112	556.7
0.01124	562.4
0.01128	557
0.01132	562.2
0.01136	558.3
0.0114	562.2
0.01144	558.4
0.01148	562.7
0.01152	559.4
0.01156	562.9
0.0116	560.1
0.01164	563.1
0.01168	560.8
0.01172	562.8
0.01176	561.7
0.0118	562.1
0.01184	562.1
0.01188	560.4
0.01192	563.6
0.01196	559.3
0.012	564.3
0.01204	557.5
0.01208	564.6
0.01212	556.9
0.01216	564.3
0.0122	555.9
0.01224	563.5
0.01228	556
0.01232	562.9
0.01236	555.9
0.0124	562.7
0.01244	557.2
0.01248	562.2
0.01252	558
0.01256	562.2
0.0126	559.5
0.01264	562.7
0.01268	559.2
0.01272	563
0.01276	559.7
0.0128	563.3
0.01284	560.6
0.01288	562.9
0.01292	561.5
0.01296	561.7
0.013	563
0.01304	560.3
0.01308	564
0.01312	558.9
0.01316	564
0.0132	557.8
0.01324	564.5
0.01328	556.9
0.01332	564.1
0.01336	555.9
0.0134	564
0.01344	555.8
0.01348	563.1
0.01352	556.2
0.01356	562.1
0.0136	557.2
0.01364	561.9
0.01368	558
0.01372	562.2
0.01376	558.8
0.0138	562.3
0.01384	559.6
0.01388	562.9
0.01392	559.8
0.01396	563.3
0.014	560.2
0.01404	562.8
0.01408	561.5
0.01412	561.7
0.01416	562.6
0.0142	560.6
0.01424	563.4
0.01428	558.7
0.01432	564.3
0.01436	557.4
0.0144	564.4
0.01444	556.2
0.01448	564
0.01452	556.2
0.01456	563.7
0.0146	555.7
0.01464	563
0.01468	556.6
0.01472	562.7
0.01476	557.4
0.0148	561.9
0.01484	558.3
0.01488	562.3
0.01492	558.8
0.01496	562.6
0.015	559
0.01504	563.2
0.01508	560
0.01512	563
0.01516	560.5
0.0152	562.7
0.01524	562
0.01528	561.5
0.01532	562.6
0.01536	560.6
0.0154	563.1
0.01544	558.6
0.01548	564.5
0.01552	557.5
0.01556	565
0.0156	556.3
0.01564	564.5
0.01568	555.7
0.01572	563.4
0.01576	556.5
0.0158	562.7
0.01584	557
0.01588	562.1
0.01592	557.1
0.01596	562.2
0.016	558.1
0.01604	561.6
0.01608	559
0.01612	562.4
0.01616	559.6
0.0162	562.8
0.01624	560.1
0.01628	562.3
0.01632	560.1
0.01636	562.6
0.0164	561.5
0.01644	561.5
0.01648	563
0.01652	559.5
0.01656	564.2
0.0166	558.3
0.01664	564.5
0.01668	557.1
0.01672	564
0.01676	556.4
0.0168	563.8
0.01684	556.4
0.01688	563.1
0.01692	555.7
0.01696	562.8
0.017	556.6
0.01704	562.4
0.01708	557.1
0.01712	561.6
0.01716	558.5
0.0172	562.2
0.01724	559
0.01728	562.4
0.01732	559.5
0.01736	562.9
0.0174	559.6
0.01744	562.7
0.01748	560.8
0.01752	562.4
0.01756	561.3
0.0176	561
0.01764	562.7
0.01768	559.7
0.01772	563.8
0.01776	558.5
0.0178	564.3
0.01784	557
0.01788	564.3
0.01792	555.7
0.01796	563.9
0.018	555.8
0.01804	563.4
0.01808	555.8
0.01812	562.9
0.01816	556.4
0.0182	562.3
0.01824	557.4
0.01828	562.3
0.01832	558.7
0.01836	561.8
0.0184	559.3
0.01844	562.7
0.01848	559.5
0.01852	563.3
0.01856	560.1
0.0186	562.5
0.01864	561.3
0.01868	562
0.01872	561.8
0.01876	561.1
0.0188	563.1
0.01884	559.9
0.01888	564
0.01892	558
0.01896	564.3
0.019	556.9
0.01904	564.4
0.01908	555.6
0.01912	564.1
0.01916	555.9
0.0192	563.3
0.01924	556
0.01928	561.7
0.01932	556.9
0.01936	562.1
0.0194	558
0.01944	561.9
0.01948	558.9
0.01952	562.2
0.01956	558.4
0.0196	562.6
0.01964	559.8
0.01968	562.6
0.01972	560.1
0.01976	562.8
0.0198	560.8
0.01984	562.3
0.01988	562
0.01992	560.9
0.01996	563.2
0.02	559
0.02004	564.3
0.02008	558
0.02012	564.3
0.02016	556.4
0.0202	564.1
0.02024	556
0.02028	563.7
0.02032	555.9
0.02036	563
0.0204	555.9
0.02044	562.7
0.02048	557
0.02052	562.1
0.02056	558
0.0206	561.9
0.02064	558.6
0.02068	562.4
0.02072	559.2
0.02076	562.4
0.0208	559.8
0.02084	562.9
0.02088	560.5
0.02092	562.8
0.02096	560.9
0.021	561.6
0.02104	562.1
0.02108	560.4
0.02112	563.6
0.02116	558.8
0.0212	564
0.02124	557.6
0.02128	564.2
0.02132	556.5
0.02136	564.2
0.0214	556.2
0.02144	563.5
0.02148	555.8
0.02152	562.8
0.02156	556.6
0.0216	562.3
0.02164	557.1
0.02168	562
0.02172	557.8
0.02176	562.3
0.0218	558.6
0.02184	562.3
0.02188	559
0.02192	563.1
0.02196	559.7
0.022	563.3
0.02204	560.2
0.02208	562.5
0.02212	562.1
0.02216	561.5
0.0222	562.3
0.02224	560.1
0.02228	563.3
0.02232	558
0.02236	564.4
0.0224	557.5
0.02244	564.5
0.02248	555.9
0.02252	563.4
0.02256	555.9
0.0226	563.6
0.02264	555.6
0.02268	562.6
0.02272	556.5
0.02276	562
0.0228	557.4
0.02284	561.7
0.02288	558.4
0.02292	561.4
0.02296	558.7
0.023	562.7
0.02304	559.3
0.02308	563
0.02312	559.7
0.02316	562.7
0.0232	560.3
0.02324	562.5
0.02328	561.7
0.02332	561.1
0.02336	562.4
0.0234	559.7
0.02344	563.9
0.02348	558.3
0.02352	564.2
0.02356	557.2
0.0236	564.7
0.02364	555.9
0.02368	564
0.02372	555.9
0.02376	563.3
0.0238	556.1
0.02384	562.9
0.02388	556.5
0.02392	562.3
0.02396	557.3
0.024	561.8
0.02404	558
0.02408	562.1
0.02412	558.9
0.02416	562.4
0.0242	559.5
0.02424	562.7
0.02428	560.3
0.02432	563.2
0.02436	560.8
0.0244	562.2
0.02444	561.4
0.02448	561.4
0.02452	562.9
0.02456	559.9
0.0246	563.8
0.02464	558
0.02468	564.4
0.02472	557
0.02476	564.6
0.0248	555.8
0.02484	564.2
0.02488	555.7
0.02492	563.3
0.02496	556.1
0.025	562.5
0.02504	556.8
0.02508	562.1
0.02512	557.6
0.02516	562.4
0.0252	558.2
0.02524	561.9
0.02528	559
0.02532	562.5
0.02536	560.2
0.0254	562.9
0.02544	560.2
0.02548	563.2
0.02552	560.7
0.02556	562.7
0.0256	562
0.02564	561
0.02568	563
0.02572	559.2
0.02576	564.6
0.0258	557.9
0.02584	564.5
0.02588	557
0.02592	564.2
0.02596	555.8
0.026	563.2
0.02604	555.7
0.02608	563
0.02612	556.2
0.02616	562.4
0.0262	556.9
0.02624	562.3
0.02628	558
0.02632	561.9
0.02636	558.9
0.0264	562.1
0.02644	559.4
0.02648	562.6
0.02652	559.8
0.02656	562.6
0.0266	560.6
0.02664	562.5
0.02668	561
0.02672	562.3
0.02676	562.3
0.0268	560.6
0.02684	563.3
0.02688	559.4
0.02692	564.1
0.02696	557.4
0.027	564.5
0.02704	556.6
0.02708	564.6
0.02712	555.7
0.02716	563.6
0.0272	555.8
0.02724	563.2
0.02728	556.3
0.02732	562.7
0.02736	556.7
0.0274	562.2
0.02744	558
0.02748	562.3
0.02752	558.7
0.02756	562.2
0.0276	559.3
0.02764	562.4
0.02768	560
0.02772	562.9
0.02776	560.6
0.0278	562.7
0.02784	561.2
0.02788	562
0.02792	562.1
0.02796	561
0.028	563
0.02804	558.9
0.02808	564.3
0.02812	558
0.02816	564.5
0.0282	556.4
0.02824	564.3
0.02828	556.1
0.02832	564
0.02836	555.7
0.0284	563.2
0.02844	556.1
0.02848	562.4
0.02852	557.4
0.02856	561.9
0.0286	557.9
0.02864	562.2
0.02868	558.3
0.02872	562
0.02876	558.7
0.0288	562.7
0.02884	559.7
0.02888	562.7
0.02892	560.2
0.02896	562.9
0.029	561.5
0.02904	561.5
0.02908	562.4
0.02912	560.8
0.02916	563.4
0.0292	558.7
0.02924	563.8
0.02928	558
0.02932	564
0.02936	557
0.0294	564.8
0.02944	556
0.02948	564.1
0.02952	556.2
0.02956	563.2
0.0296	557.1
0.02964	563.3
0.02968	557.3
0.02972	562.1
0.02976	558
0.0298	561.9
0.02984	559.3
0.02988	562.4
0.02992	559.2
0.02996	562.9
0.03	559.8
0.03004	563.4
0.03008	560.3
0.03012	563.1
0.03016	561.4
0.0302	561.9
0.03024	562.7
0.03028	560.5
0.03032	563.7
0.03036	559.3
0.0304	564.4
0.03044	557.7
0.03048	564.5
0.03052	556.9
0.03056	564.4
0.0306	556
0.03064	563.7
0.03068	556
0.03072	563.2
0.03076	556.5
0.0308	562.7
0.03084	557.3
0.03088	562.4
0.03092	558.1
0.03096	562.5
0.031	558.8
0.03104	562.7
0.03108	559.4
0.03112	562.8
0.03116	560.1
0.0312	562.9
0.03124	560.8
0.03128	562.6
0.03132	561.5
0.03136	561.9
0.0314	562.8
0.03144	560.6
0.03148	563.7
0.03152	559.1
0.03156	564.2
0.0316	557.5
0.03164	564.6
0.03168	556.7
0.03172	564.5
0.03176	555.6
0.0318	563.8
0.03184	555.6
0.03188	563.2
0.03192	556.7
0.03196	562.3
0.032	557.6
0.03204	562.3
0.03208	558.2
0.03212	562.3
0.03216	558.9
0.0322	562.7
0.03224	559.4
0.03228	562.9
0.03232	559.8
0.03236	563.3
0.0324	561
0.03244	562.6
0.03248	561.5
0.03252	561.7
0.03256	562.8
0.0326	560.8
0.03264	564.2
0.03268	559.2
0.03272	564.3
0.03276	557.8
0.0328	564.8
0.03284	556.8
0.03288	564.2
0.03292	555.8
0.03296	564.1
0.033	556
0.03304	562.6
0.03308	556.5
0.03312	562.4
0.03316	557.3
0.0332	561.8
0.03324	558
0.03328	561.9
0.03332	559.4
0.03336	562.4
0.0334	559.6
0.03344	563.5
0.03348	559.6
0.03352	562.8
0.03356	560.3
0.0336	562.5
0.03364	561.8
0.03368	561.7
0.03372	562.4
0.03376	560.2
0.0338	563.4
0.03384	558.9
0.03388	564.8
0.03392	557.7
0.03396	564.6
0.034	556.4
0.03404	564.2
0.03408	556.1
0.03412	563.6
0.03416	556
0.0342	562.9
0.03424	556.6
0.03428	562.4
0.03432	557.5
0.03436	562.3
0.0344	557.7
0.03444	562.1
0.03448	558.7
0.03452	562.6
0.03456	559.5
0.0346	562.6
0.03464	560
0.03468	562.6
0.03472	560.4
0.03476	563
0.0348	561.7
0.03484	561.1
0.03488	562.4
0.03492	560.5
0.03496	563.7
0.035	558.8
0.03504	564.1
0.03508	556.9
0.03512	564.8
0.03516	556.5
0.0352	564.2
0.03524	555.7
0.03528	563.8
0.03532	556.1
0.03536	562.8
0.0354	557.3
0.03544	562
0.03548	557.5
0.03552	562.2
0.03556	557.8
0.0356	562
0.03564	558.6
0.03568	562
0.03572	559.3
0.03576	562.9
0.0358	560.1
0.03584	562.2
0.03588	561.1
0.03592	562.1
0.03596	562
0.036	561.5
0.03604	563
0.03608	559.4
0.03612	563.8
0.03616	558.3
0.0362	564.4
0.03624	557.2
0.03628	564.4
0.03632	555.9
0.03636	564
0.0364	556.4
0.03644	563.4
0.03648	556.3
0.03652	562.7
0.03656	556.6
0.0366	562.2
0.03664	557.7
0.03668	562.1
0.03672	558.4
0.03676	561.9
0.0368	559.1
0.03684	562.6
0.03688	559.7
0.03692	563
0.03696	560.1
0.037	562.7
0.03704	560.9
0.03708	562.5
0.03712	561.7
0.03716	561.1
0.0372	563
0.03724	559.7
0.03728	563.5
0.03732	558
0.03736	564.3
0.0374	556.9
0.03744	564.2
0.03748	555.8
0.03752	563.9
0.03756	555.8
0.0376	563.3
0.03764	555.8
0.03768	562.5
0.03772	556.8
0.03776	562.2
0.0378	557.5
0.03784	562.2
0.03788	558.1
0.03792	562.2
0.03796	559
0.038	562.3
0.03804	559.6
0.03808	562.8
0.03812	560
0.03816	562.9
0.0382	560.7
0.03824	562.4
0.03828	561.5
0.03832	561.8
0.03836	562.9
0.0384	559.9
0.03844	563.7
0.03848	558.2
0.03852	564.2
0.03856	556.8
0.0386	564
0.03864	555.8
0.03868	563.6
0.03872	556
0.03876	563.3
0.0388	556
0.03884	562.3
0.03888	556.6
0.03892	562.6
0.03896	558
0.039	561.7
0.03904	558.3
0.03908	561.6
0.03912	558.8
0.03916	563.1
0.0392	559.4
0.03924	563.3
0.03928	559.7
0.03932	562.2
0.03936	560.9
0.0394	562.1
0.03944	561.9
0.03948	561
0.03952	563.1
0.03956	559.5
0.0396	563.8
0.03964	558.5
0.03968	564.3
0.03972	556.6
0.03976	564.6
0.0398	556
0.03984	563.7
0.03988	555.8
0.03992	563
0.03996	555.9
0.04	562.6
0.04004	556.7
0.04008	561.8
0.04012	557.5
0.04016	562.1
0.0402	558.1
0.04024	561.9
0.04028	559
0.04032	562.6
0.04036	559.7
0.0404	562.8
0.04044	560
0.04048	562.4
0.04052	560.8
0.04056	561.7
0.0406	562
0.04064	560.7
0.04068	563.3
0.04072	559
0.04076	563.7
0.0408	557.6
0.04084	564.6
0.04088	556.5
0.04092	564.1
0.04096	556
0.041	563.6
0.04104	555.8
0.04108	563.2
0.04112	556
0.04116	562.3
0.0412	556.7
0.04124	562.3
0.04128	557.6
0.04132	562
0.04136	558.3
0.0414	562.1
0.04144	559.2
0.04148	562.4
0.04152	559.6
0.04156	562.8
0.0416	560.4
0.04164	562.7
0.04168	561.1
0.04172	562.1
0.04176	562.4
0.0418	560.4
0.04184	563.2
0.04188	559
0.04192	564.1
0.04196	557.8
0.042	564.8
0.04204	556.2
0.04208	564
0.04212	555.7
0.04216	563.5
0.0422	556.2
0.04224	562.9
0.04228	556.4
0.04232	562.6
0.04236	556.6
0.0424	562.3
0.04244	557.9
0.04248	561.6
0.04252	558.4
0.04256	562.3
0.0426	559.4
0.04264	562.6
0.04268	559.1
0.04272	563.1
0.04276	560.4
0.0428	562.5
0.04284	561.2
0.04288	561.7
0.04292	562.5
0.04296	559.7
0.043	563.5
0.04304	559.1
0.04308	564.1
0.04312	557.5
0.04316	564.3
0.0432	556.5
0.04324	564.4
0.04328	555.3
0.04332	563.8
0.04336	555.7
0.0434	563.3
0.04344	556.7
0.04348	562.1
0.04352	557
0.04356	562.2
0.0436	558
0.04364	562.3
0.04368	558.7
0.04372	562.3
0.04376	559.2
0.0438	562.6
0.04384	559.9
0.04388	563.2
0.04392	560.2
0.04396	562.4
0.044	561.3
0.04404	561.5
0.04408	563
0.04412	560.4
0.04416	563.3
0.0442	558.6
0.04424	563.9
0.04428	557.6
0.04432	564.2
0.04436	556.4
0.0444	563.9
0.04444	555.8
0.04448	563.6
0.04452	556.1
0.04456	562.6
0.0446	556.4
0.04464	562.4
0.04468	557.2
0.04472	562.1
0.04476	558.1
0.0448	562.2
0.04484	558.8
0.04488	562.3
0.04492	559.6
0.04496	563.3
0.045	560.1
0.04504	562.9
0.04508	560.6
0.04512	562.6
0.04516	561.5
0.0452	561.8
0.04524	562.6
0.04528	560.2
0.04532	564.4
0.04536	558.4
0.0454	564.6
0.04544	557.1
0.04548	565
0.04552	556.5
0.04556	564.3
0.0456	555.7
0.04564	563.3
0.04568	556.2
0.04572	561.9
0.04576	557.1
0.0458	563
0.04584	557.4
0.04588	561.7
0.04592	558.3
0.04596	562.8
0.046	558.5
0.04604	562.7
0.04608	559.2
0.04612	562.7
0.04616	560
0.0462	562.9
0.04624	560.7
0.04628	562.6
0.04632	561.5
0.04636	561.2
0.0464	563.2
0.04644	559.7
0.04648	564.2
0.04652	558.2
0.04656	564.4
0.0466	557.1
0.04664	564.3
0.04668	556.2
0.04672	563.8
0.04676	555.7
0.0468	563
0.04684	556.3
0.04688	562.6
0.04692	556.8
0.04696	562.2
0.047	557.8
0.04704	562.2
0.04708	558.4
0.04712	561.9
0.04716	559.3
0.0472	562.6
0.04724	560
0.04728	562.9
0.04732	560.4
0.04736	563.2
0.0474	561.1
0.04744	562.5
0.04748	562.1
0.04752	561.2
0.04756	563.3
0.0476	559.2
0.04764	564.3
0.04768	558
0.04772	564.5
0.04776	556.7
0.0478	564.2
0.04784	556.3
0.04788	563.8
0.04792	555.7
0.04796	563.1
0.048	556.2
0.04804	562.5
0.04808	557.3
0.04812	562.2
0.04816	558
0.0482	561.9
0.04824	558.2
0.04828	562.7
0.04832	559.1
0.04836	562.7
0.0484	559.4
0.04844	562.9
0.04848	560.2
0.04852	563
0.04856	561.5
0.0486	561.5
0.04864	562.6
0.04868	560.3
0.04872	563.1
0.04876	559.6
0.0488	563.9
0.04884	558.1
0.04888	564.4
0.04892	556.6
0.04896	564.8
0.049	556
0.04904	564.3
0.04908	555.8
0.04912	562.9
0.04916	557
0.0492	562.7
0.04924	557.5
0.04928	562.3
0.04932	558.2
0.04936	561.8
0.0494	558.6
0.04944	563.1
0.04948	559.2
0.04952	562.2
0.04956	560
0.0496	563.4
0.04964	560.7
0.04968	562.6
0.04972	561.6
0.04976	562.2
0.0498	562.7
0.04984	560.3
0.04988	563.5
0.04992	559.2
0.04996	564.2
0.05	558
0.05004	564.4
0.05008	556.5
0.05012	564.2
0.05016	556.1
0.0502	563.8
0.05024	556
0.05028	563.3
0.05032	556.6
0.05036	562.7
0.0504	557.1
0.05044	562.3
0.05048	558.4
0.05052	562
0.05056	558.5
0.0506	562.4
0.05064	559.4
0.05068	562.8
0.05072	560.1
0.05076	563.1
0.0508	560.8
0.05084	562.8
0.05088	561.2
0.05092	561.9
0.05096	562.6
0.051	560.8
0.05104	563.6
0.05108	559.1
0.05112	564.4
0.05116	557.7
0.0512	564.9
0.05124	556.1
0.05128	564.5
0.05132	556.2
0.05136	563.6
0.0514	556.1
0.05144	562.7
0.05148	556.9
0.05152	562.6
0.05156	557.4
0.0516	562.1
0.05164	558.1
0.05168	562.4
0.05172	558.9
0.05176	562.8
0.0518	559.6
0.05184	562.8
0.05188	560.1
0.05192	563.2
0.05196	560.6
0.052	562.5
0.05204	561.5
0.05208	562
0.05212	562.6
0.05216	560.2
0.0522	563.9
0.05224	558.9
0.05228	564.2
0.05232	557.9
0.05236	564.5
0.0524	556.5
0.05244	564.3
0.05248	555.5
0.05252	564
0.05256	556.2
0.0526	563
0.05264	556.3
0.05268	562.4
0.05272	557.4
0.05276	561.8
0.0528	558.3
0.05284	562.1
0.05288	559
0.05292	562.7
0.05296	559.4
0.053	563.3
0.05304	560.2
0.05308	562.7
0.05312	560.5
0.05316	562.5
0.0532	561.7
0.05324	562.3
0.05328	563
0.05332	559.8
0.05336	563.6
0.0534	558.7
0.05344	564.8
0.05348	557.4
0.05352	564.3
0.05356	556.3
0.0536	564.2
0.05364	556.2
0.05368	563.3
0.05372	556
0.05376	562.9
0.0538	556.4
0.05384	562.7
0.05388	557.4
0.05392	562.3
0.05396	558.4
0.054	561.7
0.05404	559
0.05408	562.5
0.05412	559.3
0.05416	562.9
0.0542	559.8
0.05424	563.3
0.05428	560.9
0.05432	562.4
0.05436	561.8
0.0544	561.3
0.05444	562.6
0.05448	560.2
0.05452	563.8
0.05456	558.9
0.0546	564.1
0.05464	556.8
0.05468	564.5
0.05472	556.6
0.05476	564.3
0.0548	555.9
0.05484	563.4
0.05488	556
0.05492	562.8
0.05496	556.9
0.055	562.2
0.05504	557.1
0.05508	562.1
0.05512	558.1
0.05516	562.3
0.0552	558.7
0.05524	561.9
0.05528	559.9
0.05532	562.4
0.05536	559.9
0.0554	562.8
0.05544	560.7
0.05548	562.2
0.05552	561.5
0.05556	561.5
0.0556	562.9
0.05564	560
0.05568	563.4
0.05572	558.2
0.05576	564.3
0.0558	557.6
0.05584	564
0.05588	555.8
0.05592	564.1
0.05596	555.5
0.056	563.5
0.05604	556.5
0.05608	562.4
0.05612	556.2
0.05616	562
0.0562	557.9
0.05624	561.8
0.05628	558.4
0.05632	561.8
0.05636	559
0.0564	562.5
0.05644	559.2
0.05648	563.1
0.05652	560.2
0.05656	562.7
0.0566	560.8
0.05664	562.3
0.05668	561.6
0.05672	561.4
0.05676	562.9
0.0568	559.2
0.05684	564.1
0.05688	558
0.05692	564.4
0.05696	556.5
0.057	564.5
0.05704	556.2
0.05708	563.7
0.05712	556
0.05716	562.8
0.0572	556
0.05724	562.7
0.05728	556.5
0.05732	562.3
0.05736	557.6
0.0574	562.1
0.05744	558.5
0.05748	562.2
0.05752	559.2
0.05756	562.5
0.0576	560.2
0.05764	562.6
0.05768	560.5
0.05772	562.7
0.05776	561
0.0578	561.9
0.05784	562.1
0.05788	560.8
0.05792	563.4
0.05796	559
0.058	564.3
0.05804	557.5
0.05808	564.5
0.05812	556.3
0.05816	564.6
0.0582	556.2
0.05824	563.5
0.05828	555
0.05832	563.3
0.05836	556.4
0.0584	562.3
0.05844	557.1
0.05848	561.8
0.05852	558
0.05856	562.2
0.0586	558.8
0.05864	562.5
0.05868	558.9
0.05872	562.8
0.05876	560
0.0588	563.2
0.05884	560
0.05888	562.4
0.05892	561.4
0.05896	561.9
0.059	562.6
0.05904	560.5
0.05908	564.4
0.05912	558.6
0.05916	564.1
0.0592	557.7
0.05924	564.1
0.05928	556.8
0.05932	563.8
0.05936	555.2
0.0594	563.5
0.05944	555.5
0.05948	562.4
0.05952	555.8
0.05956	562.5
0.0596	557.2
0.05964	561.9
0.05968	558.1
0.05972	561.6
0.05976	558.7
0.0598	562
0.05984	559.3
0.05988	562.7
0.05992	559.5
0.05996	562.6
0.06	559.9
0.06004	562.6
0.06008	561.3
0.06012	561.6
0.06016	562.2
0.0602	560.2
0.06024	563.6
0.06028	558.9
0.06032	563.8
0.06036	557.3
0.0604	564.2
0.06044	556.2
0.06048	564.3
0.06052	555.8
0.06056	563.3
0.0606	555.9
0.06064	563.3
0.06068	556.2
0.06072	562.3
0.06076	556.8
0.0608	562
0.06084	557.7
0.06088	561.7
0.06092	558.8
0.06096	562.2
0.061	559.4
0.06104	562.4
0.06108	559.9
0.06112	562.9
0.06116	560.4
0.0612	562.6
0.06124	561.3
0.06128	561.4
0.06132	562.2
0.06136	560.1
0.0614	563.5
0.06144	558.5
0.06148	564.3
0.06152	557.4
0.06156	564.3
0.0616	556.1
0.06164	564.1
0.06168	555.5
0.06172	563.6
0.06176	556
0.0618	562.4
0.06184	556.6
0.06188	562
0.06192	557.4
0.06196	561.9
0.062	558
0.06204	562.2
0.06208	558.4
0.06212	562.4
0.06216	559.3
0.0622	562.2
0.06224	560
0.06228	562.9
0.06232	561.2
0.06236	562.2
0.0624	561.5
0.06244	561.1
0.06248	561.9
0.06252	559.9
0.06256	563.7
0.0626	558.1
0.06264	564.1
0.06268	557.1
0.06272	564.2
0.06276	556
0.0628	564.1
0.06284	556.2
0.06288	563.2
0.06292	556.1
0.06296	562.8
0.063	556.4
0.06304	562.7
0.06308	557.5
0.06312	561.9
0.06316	557.5
0.0632	561.9
0.06324	559.3
0.06328	562.5
0.06332	559.5
0.06336	562.6
0.0634	560
0.06344	563.3
0.06348	560.5
0.06352	562.5
0.06356	561.8
0.0636	561
0.06364	562.5
0.06368	559.8
0.06372	563.7
0.06376	558.3
0.0638	564.2
0.06384	557.1
0.06388	564.6
0.06392	555.9
0.06396	563.9
0.064	556
0.06404	563.2
0.06408	556.2
0.06412	562.7
0.06416	556.7
0.0642	562.2
0.06424	557.4
0.06428	562.3
0.06432	558.2
0.06436	562.3
0.0644	558.6
0.06444	562.4
0.06448	560
0.06452	562.8
0.06456	560.3
0.0646	562.9
0.06464	560.5
0.06468	562.3
0.06472	561.6
0.06476	561.3
0.0648	562.9
0.06484	560.1
0.06488	563.8
0.06492	558.1
0.06496	564.3
0.065	557.3
0.06504	564.4
0.06508	556.3
0.06512	564
0.06516	555.9
0.0652	563.3
0.06524	555.9
0.06528	562.4
0.06532	556.8
0.06536	562.1
0.0654	557.7
0.06544	561.9
0.06548	558.4
0.06552	561.9
0.06556	559
0.0656	563.3
0.06564	559.6
0.06568	563
0.06572	560.3
0.06576	562.5
0.0658	561.6
0.06584	562.8
0.06588	562
0.06592	561.1
0.06596	563.7
0.066	559.8
0.06604	564.1
0.06608	558.1
0.06612	564.1
0.06616	556.4
0.0662	563.8
0.06624	555.9
0.06628	563.7
0.06632	556.1
0.06636	562.2
0.0664	556
0.06644	562.6
0.06648	556.6
0.06652	562.4
0.06656	557.4
0.0666	562.2
0.06664	558.8
0.06668	561.9
0.06672	559.2
0.06676	562.4
0.0668	559.7
0.06684	562.7
0.06688	560.2
0.06692	562.6
0.06696	561.5
0.067	562
0.06704	562.2
0.06708	560.8
0.06712	563.7
0.06716	559.1
0.0672	564.6
0.06724	557.6
0.06728	564.8
0.06732	556.2
0.06736	564.1
0.0674	555.9
0.06744	563.4
0.06748	556.2
0.06752	563.3
0.06756	556.4
0.0676	562.6
0.06764	557.5
0.06768	562.3
0.06772	558
0.06776	562.1
0.0678	558.9
0.06784	562.5
0.06788	559.2
0.06792	562.8
0.06796	559.8
0.068	562.9
0.06804	560.7
0.06808	562.7
0.06812	561.5
0.06816	561.9
0.0682	562.7
0.06824	560.6
0.06828	563.4
0.06832	559
0.06836	564.3
0.0684	557.2
0.06844	564.6
0.06848	556
0.06852	564.2
0.06856	556.2
0.0686	563.7
0.06864	555.9
0.06868	562.8
0.06872	557
0.06876	562.6
0.0688	557.5
0.06884	561.8
0.06888	558.3
0.06892	562.1
0.06896	558.9
0.069	562
0.06904	559.3
0.06908	563.1
0.06912	559.6
0.06916	563.5
0.0692	561.1
0.06924	562.4
0.06928	561.5
0.06932	561
0.06936	563
0.0694	560.2
0.06944	563.8
0.06948	558.4
0.06952	563.9
0.06956	557.3
0.0696	564
0.06964	556.5
0.06968	564.2
0.06972	555.7
0.06976	563.5
0.0698	556.5
0.06984	563.3
0.06988	556.9
0.06992	562.3
0.06996	557.6
0.07	562.1
0.07004	558.6
0.07008	562
0.07012	559.2
0.07016	562.6
0.0702	559.8
0.07024	563.2
0.07028	560.4
0.07032	563.3
0.07036	560.7
0.0704	562.8
0.07044	561.6
0.07048	562.1
0.07052	563.2
0.07056	559.7
0.0706	564.2
0.07064	558.5
0.07068	564.4
0.07072	556.9
0.07076	564.2
0.0708	556.1
0.07084	564
0.07088	556.1
0.07092	563.5
0.07096	556.5
0.071	562.9
0.07104	556.9
0.07108	562.7
0.07112	557.8
0.07116	562.2
0.0712	558.3
0.07124	562.5
0.07128	559.2
0.07132	562.8
0.07136	559.7
0.0714	562.9
0.07144	560.5
0.07148	562.9
0.07152	561.2
0.07156	562.3
0.0716	561.9
0.07164	561.4
0.07168	563
0.07172	560
0.07176	563.8
0.0718	558.4
0.07184	564.5
0.07188	557
0.07192	564.6
0.07196	556.3
0.072	564
0.07204	555.5
0.07208	563.2
0.07212	556.4
0.07216	562.9
0.0722	556.7
0.07224	562.2
0.07228	557.6
0.07232	562.4
0.07236	558.7
0.0724	563
0.07244	559.1
0.07248	562.4
0.07252	559.2
0.07256	563.3
0.0726	560.6
0.07264	562.7
0.07268	561.3
0.07272	561.8
0.07276	562.1
0.0728	561.2
0.07284	564
0.07288	559.6
0.07292	563.4
0.07296	558
0.073	564.5
0.07304	557.6
0.07308	564.1
0.07312	555.8
0.07316	563.9
0.0732	555.7
0.07324	563.2
0.07328	556.2
0.07332	562.3
0.07336	556.9
0.0734	562.1
0.07344	557.7
0.07348	561.8
0.07352	558.5
0.07356	562.1
0.0736	559.3
0.07364	562.6
0.07368	560
0.07372	563
0.07376	560.1
0.0738	562.9
0.07384	561.2
0.07388	562.1
0.07392	562.4
0.07396	560.6
0.074	563.4
0.07404	559.4
0.07408	564.4
0.07412	557.7
0.07416	564.8
0.0742	556.4
0.07424	564.4
0.07428	556
0.07432	563.9
0.07436	555.7
0.0744	563
0.07444	556.5
0.07448	562.5
0.07452	557.2
0.07456	562.2
0.0746	558
0.07464	562.1
0.07468	558.5
0.07472	562.3
0.07476	559.2
0.0748	562.9
0.07484	559.7
0.07488	562.9
0.07492	560.3
0.07496	562.7
0.075	561.4
0.07504	562.2
0.07508	562.2
0.07512	560.8
0.07516	563.5
0.0752	559.3
0.07524	564.4
0.07528	557.6
0.07532	564.1
0.07536	556.5
0.0754	564.2
0.07544	555.6
0.07548	563.9
0.07552	555.8
0.07556	563.2
0.0756	556.9
0.07564	562.3
0.07568	556.7
0.07572	562
0.07576	558.1
0.0758	562.4
0.07584	558.4
0.07588	562
0.07592	559
0.07596	563.1
0.076	559.7
0.07604	563.1
0.07608	561.1
0.07612	562.7
0.07616	561.3
0.0762	562
0.07624	562.3
0.07628	559.8
0.07632	563.7
0.07636	558.6
0.0764	564.3
0.07644	557.4
0.07648	564.1
0.07652	556.6
0.07656	563.8
0.0766	556.1
0.07664	563.6
0.07668	555.9
0.07672	563.4
0.07676	556
0.0768	562.5
0.07684	557.5
0.07688	562.1
0.07692	558
0.07696	561.8
0.077	558.9
0.07704	562.4
0.07708	559.3
0.07712	562.7
0.07716	560
0.0772	563
0.07724	560.3
0.07728	562.6
0.07732	561.6
0.07736	561.5
0.0774	562.3
0.07744	560
0.07748	563.7
0.07752	558.3
0.07756	564.5
0.0776	556.5
0.07764	564.3
0.07768	556
0.07772	564.1
0.07776	555.6
0.0778	563.2
0.07784	556.1
0.07788	562.8
0.07792	556.4
0.07796	561.9
0.078	557.5
0.07804	562.1
0.07808	558
0.07812	562.1
0.07816	558.9
0.0782	562.4
0.07824	559.7
0.07828	562.8
0.07832	560.2
0.07836	562.8
0.0784	560.7
0.07844	562.1
0.07848	561.6
0.07852	561.4
0.07856	563.1
0.0786	559.6
0.07864	563.8
0.07868	558.2
0.07872	564.3
0.07876	556.5
0.0788	564
0.07884	556.2
0.07888	564
0.07892	555.5
0.07896	563.2
0.079	555.7
0.07904	562
0.07908	556.7
0.07912	561.5
0.07916	557.2
0.0792	562
0.07924	558
0.07928	561.9
0.07932	558.4
0.07936	562.6
0.0794	559.3
0.07944	563
0.07948	559.5
0.07952	562.5
0.07956	560.7
0.0796	562.6
0.07964	561.5
0.07968	560.8
0.07972	563.2
0.07976	559.3
0.0798	564.1
0.07984	558.2
0.07988	564.2
0.07992	557
[truncated: 98,001 more rows]

## Sheet: Sheet1
		100	50
time	data	butfilt1	Strain
0.452	12.38	11.7245	0.765511
0.45204	7.359	11.7202	0.765596
0.45208	12.29	11.7162	0.765675
0.45212	7.981	11.7125	0.765749
0.45216	11.95	11.7091	0.765817
0.4522	8.173	11.706	0.765879
0.45224	12.15	11.7032	0.765935
0.45228	8.412	11.7008	0.765985
0.45232	12.19	11.6986	0.766028
0.45236	9.082	11.6968	0.766064
0.4524	12.72	11.6953	0.766094
0.45244	9.752	11.6942	0.766116
0.45248	12.53	11.6934	0.766132
0.45252	10.09	11.693	0.766141
0.45256	12.91	11.6929	0.766142
0.4526	11.38	11.6932	0.766136
0.45264	11.91	11.6939	0.766123
0.45268	11.57	11.6949	0.766101
0.45272	10.81	11.6964	0.766073
0.45276	12.58	11.6982	0.766036
0.4528	9.896	11.7004	0.765992
0.45284	13.77	11.703	0.76594
0.45288	8.508	11.706	0.765879
0.45292	13.92	11.7095	0.76581
0.45296	8.412	11.7133	0.765734
0.453	13.39	11.7176	0.765648
0.45304	7.79	11.7223	0.765554
0.45308	12.67	11.7274	0.765452
0.45312	7.885	11.733	0.765341
0.45316	12.43	11.7389	0.765221
0.4532	8.125	11.7454	0.765093
0.45324	11.95	11.7522	0.764956
0.45328	8.699	11.7595	0.76481
0.45332	12.29	11.7672	0.764655
0.45336	9.082	11.7754	0.764491
0.4534	13.2	11.784	0.764319
0.45344	9.609	11.7931	0.764138
0.45348	12.86	11.8026	0.763948
0.45352	9.896	11.8125	0.76375
0.45356	13.53	11.8229	0.763543
0.4536	10.57	11.8337	0.763327
0.45364	13.34	11.8449	0.763102
0.45368	11.28	11.8565	0.762869
0.45372	12.67	11.8686	0.762628
0.45376	12.86	11.8811	0.762377
0.4538	11.57	11.8941	0.762119
0.45384	13.53	11.9074	0.761852
0.45388	10.66	11.9212	0.761576
0.45392	14.35	11.9354	0.761292
0.45396	9.369	11.95	0.760999
0.454	14.06	11.9651	0.760698
0.45404	8.891	11.9806	0.760389
0.45408	13.53	11.9965	0.760071
0.45412	8.747	12.0128	0.759744
0.45416	13.87	12.0295	0.75941
0.4542	8.555	12.0467	0.759067
0.45424	12.96	12.0642	0.758715
0.45428	8.316	12.0822	0.758355
0.45432	13.2	12.1006	0.757987
0.45436	9.13	12.1194	0.757611
0.4544	12.96	12.1387	0.757227
0.45444	10.09	12.1583	0.756835
0.45448	13.39	12.1783	0.756434
0.45452	10.09	12.1987	0.756026
0.45456	13.73	12.2195	0.75561
0.4546	11.14	12.2407	0.755187
0.45464	13.92	12.2622	0.754756
0.45468	11.33	12.2841	0.754317
0.45472	14.01	12.3064	0.753871
0.45476	12.19	12.3291	0.753418
0.4548	13.49	12.3521	0.752958
0.45484	13.15	12.3755	0.75249
0.45488	12.58	12.3992	0.752016
0.45492	14.3	12.4233	0.751534
0.45496	11.33	12.4477	0.751046
0.455	14.97	12.4725	0.750551
0.45504	10.95	12.4976	0.750049
0.45508	14.87	12.523	0.74954
0.45512	9.609	12.5488	0.749025
0.45516	14.97	12.5749	0.748503
0.4552	9.178	12.6013	0.747974
0.45524	14.3	12.6281	0.747439
0.45528	9.465	12.6551	0.746897
0.45532	13.92	12.6825	0.746349
0.45536	10.33	12.7103	0.745795
0.4554	13.96	12.7383	0.745234
0.45544	10.18	12.7666	0.744667
0.45548	14.35	12.7953	0.744094
0.45552	10.66	12.8242	0.743515
0.45556	13.92	12.8535	0.74293
0.4556	10.9	12.883	0.74234
0.45564	14.4	12.9128	0.741743
0.45568	11.43	12.9429	0.741141
0.45572	15.07	12.9733	0.740534
0.45576	11.62	13.004	0.739921
0.4558	14.73	13.0349	0.739303
0.45584	13.01	13.066	0.738679
0.45588	14.4	13.0975	0.738051
0.45592	14.2	13.1291	0.737417
0.45596	13.68	13.1611	0.736779
0.456	15.16	13.1932	0.736135
0.45604	11.91	13.2256	0.735487
0.45608	15.78	13.2583	0.734834
0.45612	11.52	13.2912	0.734177
0.45616	15.93	13.3243	0.733514
0.4562	10.28	13.3576	0.732848
0.45624	15.69	13.3912	0.732176
0.45628	10.28	13.425	0.731501
0.45632	15.74	13.459	0.730821
0.45636	10.52	13.4932	0.730136
0.4564	15.74	13.5276	0.729447
0.45644	10.95	13.5623	0.728754
0.45648	14.97	13.5971	0.728057
0.45652	10.76	13.6322	0.727356
0.45656	15.16	13.6675	0.726651
0.4566	11.86	13.7029	0.725942
0.45664	14.73	13.7386	0.725228
0.45668	11.81	13.7744	0.724512
0.45672	15.07	13.8104	0.723791
0.45676	12.62	13.8466	0.723067
0.4568	16.07	13.883	0.72234
0.45684	13.34	13.9196	0.721609
0.45688	15.74	13.9563	0.720874
0.45692	14.06	13.9931	0.720137
0.45696	15.74	14.0302	0.719396
0.457	15.21	14.0674	0.718653
0.45704	14.87	14.1047	0.717906
0.45708	15.74	14.1422	0.717156
0.45712	13.34	14.1798	0.716404
0.45716	16.6	14.2176	0.715648
0.4572	12.38	14.2555	0.71489
0.45724	16.98	14.2935	0.714129
0.45728	11.38	14.3317	0.713365
0.45732	16.6	14.3701	0.712598
0.45736	11.14	14.4085	0.711829
0.4574	16.31	14.4472	0.711057
0.45744	11.67	14.4859	0.710282
0.45748	16.31	14.5248	0.709505
0.45752	11.57	14.5638	0.708724
0.45756	15.78	14.6029	0.707942
0.4576	11.76	14.6422	0.707157
0.45764	15.97	14.6815	0.706369
0.45768	12.58	14.721	0.705579
0.45772	15.97	14.7607	0.704787
0.45776	12.82	14.8004	0.703992
0.4578	16.55	14.8402	0.703196
0.45784	13.34	14.8802	0.702397
0.45788	17.17	14.9202	0.701596
0.45792	14.44	14.9603	0.700794
0.45796	16.98	15.0005	0.699989
0.458	14.92	15.0409	0.699183
0.45804	16.45	15.0813	0.698375
0.45808	16.07	15.1217	0.697565
0.45812	15.54	15.1623	0.696754
0.45816	17.08	15.2029	0.695941
0.4582	14.73	15.2437	0.695127
0.45824	17.55	15.2844	0.694311
0.45828	13.49	15.3253	0.693494
0.45832	17.79	15.3663	0.692675
0.45836	12.82	15.4073	0.691855
0.4584	17.51	15.4483	0.691033
0.45844	12.77	15.4895	0.69021
0.45848	17.6	15.5307	0.689385
0.45852	12.38	15.572	0.68856
0.45856	17.17	15.6134	0.687732
0.4586	12.29	15.6548	0.686904
0.45864	17.12	15.6963	0.686074
0.45868	12.91	15.7379	0.685243
0.45872	17.12	15.7795	0.68441
0.45876	13.49	15.8212	0.683577
0.4588	16.84	15.8629	0.682742
0.45884	14.4	15.9047	0.681906
0.45888	18.08	15.9465	0.68107
0.45892	14.68	15.9884	0.680232
0.45896	18.08	16.0303	0.679394
0.459	15.02	16.0723	0.678555
0.45904	18.08	16.1143	0.677715
0.45908	16.36	16.1563	0.676874
0.45912	17.99	16.1983	0.676033
0.45916	17.7	16.2404	0.675191
0.4592	16.93	16.2825	0.674349
0.45924	17.6	16.3247	0.673506
0.45928	15.11	16.3668	0.672663
0.45932	19.04	16.409	0.671819
0.45936	15.11	16.4512	0.670975
0.4594	19.13	16.4935	0.67013
0.45944	13.53	16.5357	0.669285
0.45948	19.42	16.578	0.66844
0.45952	13.73	16.6203	0.667593
0.45956	18.7	16.6627	0.666747
0.4596	13.63	16.705	0.665899
0.45964	18.46	16.7474	0.665051
0.45968	13.92	16.7898	0.664203
0.45972	17.75	16.8323	0.663354
0.45976	14.11	16.8748	0.662505
0.4598	18.18	16.9172	0.661655
0.45984	14.35	16.9598	0.660805
0.45988	18.08	17.0023	0.659954
0.45992	14.63	17.0448	0.659103
0.45996	18.99	17.0874	0.658252
0.46	15.69	17.13	0.6574
0.46004	18.89	17.1726	0.656549
0.46008	16.41	17.2152	0.655697
0.46012	19.04	17.2578	0.654845
0.46016	17.27	17.3004	0.653992
0.4602	18.85	17.343	0.65314
0.46024	18.03	17.3856	0.652288
0.46028	18.08	17.4282	0.651436
0.46032	19.13	17.4708	0.650584
0.46036	17.03	17.5134	0.649732
0.4604	20	17.556	0.64888
0.46044	15.74	17.5986	0.648027
0.46048	20.19	17.6412	0.647176
0.46052	15.3	17.6838	0.646324
0.46056	20.38	17.7264	0.645472
0.4606	14.97	17.769	0.64462
0.46064	19.71	17.8116	0.643768
0.46068	14.4	17.8542	0.642916
0.46072	19.37	17.8968	0.642064
0.46076	15.02	17.9394	0.641212
0.4608	19.37	17.982	0.64036
0.46084	14.97	18.0246	0.639507
0.46088	19.42	18.0672	0.638655
0.46092	15.5	18.1098	0.637803
0.46096	19.28	18.1524	0.636951
0.461	16.17	18.195	0.6361
0.46104	19.9	18.2376	0.635248
0.46108	16.74	18.2802	0.634396
0.46112	20.38	18.3227	0.633545
0.46116	17.36	18.3653	0.632694
0.4612	20.76	18.4078	0.631843
0.46124	18.13	18.4503	0.630993
0.46128	20	18.4928	0.630143
0.46132	19.13	18.5353	0.629294
0.46136	19.28	18.5778	0.628445
0.4614	20.14	18.6202	0.627596
0.46144	18.22	18.6626	0.626748
0.46148	21	18.705	0.6259
0.46152	17.27	18.7474	0.625052
0.46156	21.29	18.7897	0.624206
0.4616	16.41	18.8321	0.623359
0.46164	22.01	18.8744	0.622513
0.46168	16.12	18.9167	0.621667
0.46172	21.38	18.9589	0.620821
0.46176	15.93	19.0012	0.619976
0.4618	20.76	19.0434	0.619131
0.46184	16.12	19.0857	0.618287
0.46188	20.47	19.1279	0.617442
0.46192	16.5	19.1701	0.616598
0.46196	20.24	19.2123	0.615754
0.462	16.55	19.2545	0.614911
0.46204	20.43	19.2966	0.614067
0.46208	17.51	19.3388	0.613224
0.46212	21.29	19.3809	0.612381
0.46216	17.6	19.4231	0.611539
0.4622	21.43	19.4652	0.610696
0.46224	18.42	19.5073	0.609855
0.46228	21.67	19.5493	0.609013
0.46232	19.04	19.5914	0.608172
0.46236	21.34	19.6334	0.607332
0.4624	20	19.6754	0.606491
0.46244	20.67	19.7174	0.605652
0.46248	20.47	19.7594	0.604812
0.46252	19.71	19.8013	0.603973
0.46256	21.72	19.8433	0.603135
0.4626	18.42	19.8852	0.602296
0.46264	22.15	19.9271	0.601458
0.46268	17.41	19.969	0.600621
0.46272	23.01	20.0108	0.599783
0.46276	17.12	20.0527	0.598946
0.4628	22.48	20.0945	0.598109
0.46284	17.03	20.1364	0.597273
0.46288	21.86	20.1782	0.596436
0.46292	16.6	20.22	0.5956
0.46296	21.91	20.2618	0.594763
0.463	17.51	20.3036	0.593927
0.46304	21.19	20.3454	0.593091
0.46308	17.65	20.3872	0.592255
0.46312	21.05	20.429	0.591419
0.46316	18.22	20.4708	0.590584
0.4632	22.15	20.5126	0.589748
0.46324	18.7	20.5544	0.588913
0.46328	22.25	20.5961	0.588078
0.46332	19.37	20.6379	0.587243
0.46336	23.15	20.6796	0.586408
0.4634	19.33	20.7213	0.585574
0.46344	22.77	20.763	0.58474
0.46348	20.81	20.8047	0.583907
0.46352	22.25	20.8463	0.583074
0.46356	21.67	20.8879	0.582241
0.4636	21.24	20.9296	0.581409
0.46364	22.92	20.9711	0.580577
0.46368	19.95	21.0127	0.579746
0.46372	23.54	21.0543	0.578915
0.46376	19.09	21.0958	0.578084
0.4638	24.02	21.1373	0.577253
0.46384	18.46	21.1788	0.576423
0.46388	23.3	21.2203	0.575594
0.46392	18.03	21.2618	0.574764
0.46396	23.25	21.3033	0.573935
0.464	17.84	21.3447	0.573106
0.46404	22.82	21.3862	0.572277
0.46408	18.56	21.4276	0.571448
0.46412	22.63	21.469	0.570619
0.46416	18.8	21.5104	0.569791
0.4642	22.63	21.5519	0.568963
0.46424	19.33	21.5932	0.568135
0.46428	23.39	21.6346	0.567307
0.46432	19.56	21.676	0.56648
0.46436	23.2	21.7174	0.565653
0.4644	20.43	21.7587	0.564826
0.46444	23.49	21.8	0.564
0.46448	21	21.8413	0.563174
0.46452	24.11	21.8826	0.562348
0.46456	21.48	21.9238	0.561523
0.4646	23.3	21.9651	0.560699
0.46464	22.63	22.0063	0.559874
0.46468	22.58	22.0475	0.559051
0.46472	24.16	22.0886	0.558228
0.46476	21.34	22.1297	0.557405
0.4648	24.59	22.1709	0.556583
0.46484	19.95	22.2119	0.555761
0.46488	24.83	22.253	0.55494
0.46492	19.52	22.2941	0.554119
0.46496	24.93	22.3351	0.553298
0.465	19.37	22.3761	0.552478
0.46504	24.26	22.4171	0.551659
0.46508	19.18	22.458	0.550839
0.46512	24.21	22.499	0.55002
0.46516	19.8	22.5399	0.549201
0.4652	24.02	22.5809	0.548383
0.46524	19.85	22.6218	0.547564
0.46528	23.87	22.6627	0.546746
0.46532	20.24	22.7036	0.545929
0.46536	24.11	22.7444	0.545111
0.4654	21	22.7853	0.544295
0.46544	24.69	22.8261	0.543478
0.46548	21.58	22.8669	0.542662
0.46552	25.12	22.9077	0.541846
0.46556	21.81	22.9485	0.541031
0.4656	25.45	22.9892	0.540216
0.46564	22.44	23.0299	0.539402
0.46568	24.35	23.0706	0.538588
0.46572	24.02	23.1113	0.537775
0.46576	23.78	23.1519	0.536962
0.4658	24.69	23.1925	0.53615
0.46584	22.29	23.2331	0.535338
0.46588	25.5	23.2737	0.534527
0.46592	21.53	23.3142	0.533716
0.46596	26.31	23.3547	0.532905
0.466	21.1	23.3953	0.532095
0.46604	25.74	23.4357	0.531285
0.46608	21	23.4762	0.530475
0.46612	25.26	23.5167	0.529666
0.46616	19.85	23.5572	0.528857
0.4662	25.69	23.5976	0.528048
0.46624	20.67	23.638	0.527239
0.46628	24.26	23.6785	0.52643
0.46632	21.24	23.7189	0.525622
0.46636	25.21	23.7593	0.524813
0.4664	21.62	23.7998	0.524005
0.46644	25.07	23.8402	0.523197
0.46648	21.72	23.8806	0.522388
0.46652	25.5	23.921	0.52158
0.46656	22.72	23.9614	0.520773
0.4666	25.88	24.0017	0.519965
0.46664	23.11	24.0421	0.519158
0.46668	25.93	24.0825	0.51835
0.46672	23.87	24.1228	0.517543
0.46676	25.17	24.1632	0.516736
0.4668	24.69	24.2035	0.51593
0.46684	25.02	24.2438	0.515123
0.46688	25.36	24.2842	0.514317
0.46692	23.92	24.3245	0.513511
0.46696	26.46	24.3648	0.512705
0.467	22.68	24.4051	0.511899
0.46704	27.32	24.4453	0.511093
0.46708	21.91	24.4856	0.510287
0.46712	27.32	24.5259	0.509482
0.46716	21.43	24.5662	0.508676
0.4672	26.84	24.6065	0.50787
0.46724	21.29	24.6468	0.507064
0.46728	25.88	24.6871	0.506258
0.46732	21.62	24.7274	0.505452
0.46736	25.74	24.7677	0.504645
0.4674	22.25	24.8081	0.503839
0.46744	26.27	24.8484	0.503032
0.46748	22.39	24.8888	0.502225
0.46752	26.46	24.9291	0.501418
0.46756	22.96	24.9695	0.50061
0.4676	26.7	25.0099	0.499803
0.46764	23.83	25.0502	0.498995
0.46768	27.03	25.0906	0.498187
0.46772	24.26	25.131	0.497379
0.46776	27.08	25.1714	0.496571
0.4678	24.97	25.2118	0.495763
0.46784	26.79	25.2523	0.494955
0.46788	25.93	25.2927	0.494146
0.46792	25.98	25.3331	0.493338
0.46796	27.22	25.3735	0.492529
0.468	25.02	25.414	0.49172
0.46804	27.61	25.4544	0.490911
0.46808	23.73	25.4949	0.490102
0.46812	28.04	25.5354	0.489293
0.46816	23.11	25.5759	0.488483
0.4682	27.75	25.6164	0.487673
0.46824	22.53	25.6569	0.486862
0.46828	27.51	25.6975	0.486051
0.46832	22.39	25.7381	0.485239
0.46836	27.22	25.7787	0.484427
0.4684	22.58	25.8193	0.483614
0.46844	27.08	25.86	0.4828
0.46848	22.96	25.9007	0.481986
0.46852	27.7	25.9414	0.481172
0.46856	23.35	25.9822	0.480356
0.4686	26.84	26.023	0.47954
0.46864	23.83	26.0638	0.478724
0.46868	27.65	26.1047	0.477907
0.46872	24.35	26.1456	0.477089
0.46876	27.99	26.1865	0.476271
0.4688	24.83	26.2274	0.475452
0.46884	28.66	26.2684	0.474632
0.46888	25.55	26.3094	0.473812
0.46892	27.65	26.3504	0.472992
0.46896	27.13	26.3914	0.472171
0.469	26.98	26.4325	0.47135
0.46904	27.94	26.4736	0.470528
0.46908	25.64	26.5147	0.469706
0.46912	29.14	26.5559	0.468883
0.46916	24.97	26.597	0.46806
0.4692	29.04	26.6382	0.467236
0.46924	23.68	26.6794	0.466411
0.46928	28.56	26.7207	0.465586
0.46932	23.49	26.762	0.46476
0.46936	28.85	26.8033	0.463934
0.4694	23.39	26.8446	0.463107
0.46944	28.37	26.886	0.462279
0.46948	23.73	26.9275	0.461451
0.46952	27.85	26.9689	0.460622
0.46956	24.21	27.0104	0.459792
0.4696	28.37	27.0519	0.458962
0.46964	24.59	27.0935	0.458131
0.46968	27.85	27.135	0.457299
0.46972	24.69	27.1766	0.456467
0.46976	28.85	27.2183	0.455635
0.4698	25.6	27.2599	0.454802
0.46984	29.28	27.3016	0.453968
0.46988	26.17	27.3433	0.453135
0.46992	29.23	27.385	0.452301
0.46996	26.84	27.4267	0.451466
0.47	29.19	27.4684	0.450632
0.47004	28.23	27.5101	0.449797
0.47008	27.85	27.5519	0.448963
0.47012	29.33	27.5936	0.448128
0.47016	27.08	27.6353	0.447293
0.4702	30.14	27.6771	0.446458
0.47024	26.12	27.7188	0.445623
0.47028	30	27.7606	0.444788
0.47032	25.55	27.8024	0.443953
0.47036	30.62	27.8441	0.443118
0.4704	24.78	27.8859	0.442283
0.47044	29.86	27.9276	0.441447
0.47048	24.64	27.9694	0.440612
0.47052	30.34	28.0112	0.439776
0.47056	24.93	28.053	0.438941
0.4706	29.62	28.0947	0.438105
0.47064	25.26	28.1365	0.43727
0.47068	29.47	28.1783	0.436434
0.47072	25.93	28.2201	0.435598
0.47076	29.62	28.2619	0.434763
0.4708	26.51	28.3036	0.433927
0.47084	29.76	28.3454	0.433092
0.47088	26.75	28.3872	0.432257
0.47092	30.34	28.4289	0.431422
0.47096	27.89	28.4706	0.430587
0.471	30.48	28.5124	0.429753
0.47104	28.18	28.5541	0.428919
0.47108	30.14	28.5957	0.428085
0.47112	29.23	28.6374	0.427252
0.47116	29.62	28.6791	0.426419
0.4712	30.05	28.7207	0.425586
0.47124	28.42	28.7623	0.424754
0.47128	31.34	28.8039	0.423923
0.47132	27.13	28.8454	0.423091
0.47136	31.48	28.887	0.42226
0.4714	26.46	28.9285	0.42143
0.47144	31.53	28.97	0.420599
0.47148	25.69	29.0115	0.419769
0.47152	31.2	29.053	0.41894
0.47156	25.98	29.0945	0.41811
0.4716	30.72	29.1359	0.417281
0.47164	26.17	29.1774	0.416452
0.47168	30.29	29.2188	0.415623
0.47172	26.7	29.2602	0.414795
0.47176	30.57	29.3017	0.413967
0.4718	26.79	29.3431	0.413139
0.47184	30.96	29.3844	0.412311
0.47188	27.51	29.4258	0.411484
0.47192	31.29	29.4671	0.410657
0.47196	27.75	29.5085	0.40983
0.472	31.53	29.5498	0.409004
0.47204	28.23	29.5911	0.408178
0.47208	31.63	29.6323	0.407353
0.47212	29.52	29.6736	0.406528
0.47216	31.2	29.7148	0.405704
0.4722	30.53	29.756	0.40488
0.47224	30.62	29.7972	0.404057
0.47228	31.48	29.8383	0.403234
0.47232	29.81	29.8794	0.402412
0.47236	31.91	29.9205	0.40159
0.4724	28.56	29.9616	0.400769
0.47244	32.54	30.0026	0.399948
0.47248	27.8	30.0436	0.399128
0.47252	32.58	30.0846	0.398308
0.47256	27.22	30.1256	0.397488
0.4726	32.35	30.1666	0.396669
0.47264	26.98	30.2075	0.395849
0.47268	31.63	30.2485	0.39503
0.47272	26.94	30.2894	0.394212
0.47276	31.39	30.3303	0.393393
0.4728	27.32	30.3713	0.392575
0.47284	31.68	30.4122	0.391757
0.47288	27.75	30.4531	0.390939
0.47292	31.34	30.494	0.390121
0.47296	28.71	30.5348	0.389303
0.473	32.11	30.5757	0.388486
0.47304	28.8	30.6165	0.387669
0.47308	32.78	30.6574	0.386852
0.47312	29.57	30.6982	0.386036
0.47316	33.02	30.739	0.38522
0.4732	29.95	30.7798	0.384404
0.47324	32.87	30.8205	0.383589
0.47328	30.81	30.8613	0.382774
0.47332	31.72	30.902	0.38196
0.47336	32.06	30.9427	0.381146
0.4734	30.96	30.9834	0.380332
0.47344	33.35	31.024	0.379519
0.47348	29.43	31.0647	0.378707
0.47352	33.3	31.1053	0.377894
0.47356	28.66	31.1459	0.377082
0.4736	33.83	31.1865	0.37627
0.47364	28.04	31.2271	0.375459
0.47368	33.4	31.2676	0.374648
0.47372	27.89	31.3082	0.373837
0.47376	32.73	31.3487	0.373026
0.4738	28.04	31.3892	0.372215
0.47384	32.78	31.4298	0.371405
0.47388	28.56	31.4703	0.370595
0.47392	32.35	31.5108	0.369785
0.47396	29.28	31.5512	0.368975
0.474	32.35	31.5917	0.368166
0.47404	29.76	31.6322	0.367357
0.47408	33.3	31.6726	0.366548
0.47412	29.62	31.713	0.365739
0.47416	33.45	31.7534	0.364931
0.4742	30.43	31.7938	0.364124
0.47424	33.93	31.8342	0.363317
0.47428	31.1	31.8745	0.36251
0.47432	33.78	31.9148	0.361704
0.47436	31.96	31.9551	0.360899
0.4744	32.68	31.9953	0.360094
0.47444	32.92	32.0355	0.35929
0.47448	32.78	32.0757	0.358487
0.47452	34.12	32.1158	0.357684
0.47456	31.01	32.1559	0.356882
0.4746	34.88	32.196	0.356081
0.47464	30.14	32.236	0.35528
0.47468	34.88	32.276	0.35448
0.47472	29.57	32.316	0.35368
0.47476	34.83	32.3559	0.352882
0.4748	29.43	32.3958	0.352083
0.47484	34.02	32.4357	0.351286
0.47488	29.14	32.4756	0.350489
0.47492	34.26	32.5154	0.349692
0.47496	29.57	32.5552	0.348896
0.475	33.59	32.5949	0.348101
0.47504	30	32.6347	0.347306
0.47508	33.69	32.6744	0.346512
0.47512	30.48	32.7141	0.345719
0.47516	33.78	32.7537	0.344926
0.4752	30.91	32.7933	0.344134
0.47524	34.45	32.8329	0.343343
0.47528	31.29	32.8724	0.342552
0.47532	34.98	32.9119	0.341763
0.47536	32.25	32.9513	0.340974
0.4754	35.22	32.9907	0.340186
0.47544	32.11	33.03	0.339399
0.47548	34.55	33.0693	0.338613
0.47552	33.49	33.1086	0.337828
0.47556	33.97	33.1478	0.337044
0.4756	34.79	33.1869	0.336262
0.47564	32.54	33.226	0.33548
0.47568	35.65	33.265	0.334699
0.47572	31.48	33.304	0.33392
0.47576	36.03	33.3429	0.333141
0.4758	30.34	33.3818	0.332364
0.47584	35.7	33.4206	0.331587
0.47588	30.77	33.4594	0.330812
0.47592	35.7	33.4981	0.330037
0.47596	30.14	33.5368	0.329263
0.476	35.07	33.5755	0.328491
0.47604	30.34	33.614	0.327719
0.47608	34.88	33.6526	0.326949
0.47612	31.48	33.691	0.326179
0.47616	34.88	33.7295	0.325411
0.4762	31.63	33.7678	0.324643
0.47624	35.12	33.8061	0.323877
0.47628	31.24	33.8444	0.323112
0.47632	36.03	33.8826	0.322348
0.47636	32.68	33.9207	0.321585
0.4764	36.08	33.9588	0.320824
0.47644	32.97	33.9968	0.320064
0.47648	36.51	34.0348	0.319305
0.47652	33.45	34.0726	0.318547
0.47656	35.65	34.1104	0.317791
0.4766	35.07	34.1482	0.317036
0.47664	34.98	34.1858	0.316283
0.47668	35.74	34.2234	0.315531
0.47672	33.73	34.261	0.314781
0.47676	36.46	34.2984	0.314032
0.4768	32.87	34.3358	0.313284
0.47684	37.04	34.3731	0.312538
0.47688	31.44	34.4104	0.311793
0.47692	36.99	34.4475	0.311049
0.47696	31.29	34.4847	0.310307
0.477	36.61	34.5217	0.309566
0.47704	31.2	34.5587	0.308826
0.47708	36.51	34.5956	0.308087
0.47712	31.72	34.6325	0.30735
0.47716	36.03	34.6693	0.306613
0.4772	31.91	34.7061	0.305878
0.47724	36.22	34.7428	0.305145
0.47728	32.25	34.7794	0.304412
0.47732	36.13	34.816	0.303681
0.47736	32.73	34.8525	0.302951
0.4774	36.32	34.8889	0.302222
0.47744	33.4	34.9253	0.301494
0.47748	36.94	34.9616	0.300768
0.47752	33.78	34.9978	0.300044
0.47756	37.47	35.034	0.29932
0.4776	34.55	35.0701	0.298598
0.47764	36.61	35.1061	0.297878
0.47768	35.74	35.1421	0.297159
0.47772	36.03	35.1779	0.296441
0.47776	36.94	35.2137	0.295725
0.4778	34.79	35.2495	0.29501
0.47784	37.47	35.2851	0.294297
0.47788	33.88	35.3207	0.293585
0.47792	37.99	35.3563	0.292875
0.47796	33.02	35.3917	0.292166
0.478	38.14	35.4271	0.291458
0.47804	32.49	35.4624	0.290751
0.47808	37.52	35.4977	0.290046
0.47812	32.25	35.5329	0.289342
0.47816	37.28	35.5681	0.288638
0.4782	32.39	35.6032	0.287937
0.47824	37.08	35.6382	0.287236
0.47828	32.87	35.6732	0.286536
0.47832	37.04	35.7081	0.285837
0.47836	33.49	35.743	0.28514
0.4784	36.99	35.7778	0.284443
0.47844	33.78	35.8126	0.283748
0.47848	37.23	35.8473	0.283054
0.47852	34.4	35.882	0.282361
0.47856	37.8	35.9166	0.281669
0.4786	34.98	35.9511	0.280978
0.47864	37.9	35.9856	0.280288
0.47868	35.65	36.02	0.2796
0.47872	37.99	36.0544	0.278913
0.47876	36.22	36.0887	0.278227
0.4788	36.8	36.1229	0.277542
0.47884	37.71	36.1571	0.276858
0.47888	36.13	36.1912	0.276176
0.47892	38.42	36.2253	0.275494
0.47896	35.46	36.2593	0.274814
0.479	38.86	36.2933	0.274134
0.47904	33.49	36.3272	0.273456
0.47908	39.24	36.3611	0.272779
0.47912	33.59	36.3949	0.272102
0.47916	38.71	36.4287	0.271426
0.4792	33.45	36.4624	0.270752
0.47924	37.61	36.4961	0.270077
0.47928	33.35	36.5298	0.269404
0.47932	37.75	36.5634	0.268731
0.47936	33.73	36.5971	0.268059
0.4794	37.95	36.6306	0.267387
0.47944	33.4	36.6642	0.266716
0.47948	37.95	36.6977	0.266046
0.47952	34.64	36.7312	0.265376
0.47956	38.42	36.7647	0.264707
0.4796	35.27	36.7981	0.264038
0.47964	38.62	36.8315	0.26337
0.47968	35.6	36.8648	0.262703
0.47972	39.05	36.8982	0.262036
0.47976	36.17	36.9315	0.26137
0.4798	38.47	36.9648	0.260705
0.47984	37.37	36.998	0.26004
0.47988	37.99	37.0312	0.259376
0.47992	37.99	37.0644	0.258713
0.47996	36.75	37.0975	0.25805
0.48	39.19	37.1306	0.257387
0.48004	35.7	37.1637	0.256726
0.48008	39.57	37.1968	0.256064
0.48012	35.12	37.2298	0.255404
0.48016	39.62	37.2628	0.254743
0.4802	34.5	37.2958	0.254083
0.48024	39.43	37.3288	0.253424
0.48028	34.12	37.3618	0.252764
0.48032	39.43	37.3947	0.252105
0.48036	34.26	37.4277	0.251446
0.4804	38.86	37.4606	0.250788
0.48044	34.4	37.4935	0.250129
0.48048	39.09	37.5264	0.249471
0.48052	35.07	37.5593	0.248813
0.48056	38.76	37.5922	0.248155
0.4806	35.5	37.6251	0.247497
0.48064	39.14	37.658	0.24684
0.48068	35.94	37.6909	0.246183
0.48072	39.53	37.7237	0.245526
0.48076	36.46	37.7566	0.244869
0.4808	39.86	37.7894	0.244212
0.48084	37.18	37.8222	0.243556
0.48088	39.72	37.855	0.242899
0.48092	38.09	37.8878	0.242243
0.48096	39.05	37.9206	0.241588
0.481	39.09	37.9534	0.240932
0.48104	37.95	37.9861	0.240277
0.48108	39.96	38.0189	0.239622
0.48112	36.99	38.0517	0.238967
0.48116	40.44	38.0844	0.238312
0.4812	35.79	38.1171	0.237657
0.48124	40.77	38.1499	0.237002
0.48128	35.22	38.1826	0.236348
0.48132	40.63	38.2154	0.235693
0.48136	34.93	38.2481	0.235038
0.4814	40.1	38.2809	0.234383
0.48144	35.5	38.3136	0.233727
0.48148	39.62	38.3464	0.233071
0.48152	35.41	38.3792	0.232416
0.48156	39.53	38.412	0.231759
0.4816	35.55	38.4449	0.231103
0.48164	39.62	38.4777	0.230446
0.48168	36.22	38.5106	0.229789
0.48172	40.1	38.5434	0.229131
0.48176	36.75	38.5763	0.228474
0.4818	40.53	38.6092	0.227816
0.48184	37.18	38.6421	0.227158
0.48188	40.77	38.675	0.226499
0.48192	38.14	38.708	0.22584
0.48196	40.53	38.7409	0.225181
0.482	38.95	38.7739	0.224522
0.48204	40	38.8069	0.223863
0.48208	39.91	38.8399	0.223203
0.48212	39.19	38.8729	0.222543
0.48216	41.01	38.9059	0.221882
0.4822	37.9	38.9389	0.221222
0.48224	41.54	38.972	0.220561
0.48228	36.84	39.005	0.219899
0.48232	41.58	39.0381	0.219237
0.48236	36.46	39.0713	0.218575
0.4824	41.39	39.1044	0.217911
0.48244	35.94	39.1376	0.217248
0.48248	40.63	39.1708	0.216583
0.48252	35.7	39.2041	0.215918
0.48256	41.01	39.2374	0.215252
0.4826	36.13	39.2707	0.214585
0.48264	40.48	39.3041	0.213918
0.48268	35.98	39.3375	0.213249
0.48272	40.63	39.371	0.21258
0.48276	37.56	39.4045	0.211909
0.4828	40.67	39.4381	0.211238
0.48284	37.66	39.4717	0.210566
0.48288	41.11	39.5053	0.209894
0.48292	38.09	39.539	0.20922
0.48296	41.49	39.5727	0.208546
0.483	38.71	39.6065	0.207871
0.48304	41.3	39.6403	0.207195
0.48308	39.24	39.6741	0.206518
0.48312	41.01	39.708	0.20584
0.48316	40.44	39.7419	0.205162
0.4832	40.05	39.7759	0.204483
0.48324	41.44	39.8099	0.203803
0.48328	38.52	39.8439	0.203122
0.48332	42.4	39.878	0.20244
0.48336	37.8	39.9121	0.201757
0.4834	42.45	39.9463	0.201074
0.48344	36.99	39.9805	0.200389
0.48348	42.25	40.0148	0.199704
0.48352	36.7	40.0492	0.199017
0.48356	41.63	40.0835	0.198329
0.4836	36.89	40.118	0.197641
0.48364	41.54	40.1525	0.196951
0.48368	36.89	40.187	0.19626
0.48372	41.01	40.2216	0.195568
0.48376	37.08	40.2563	0.194875
0.4838	41.39	40.291	0.19418
0.48384	38.04	40.3257	0.193485
0.48388	41.97	40.3606	0.192789
0.48392	38.04	40.3954	0.192092
0.48396	42.11	40.4303	0.191394
0.484	38.62	40.4653	0.190694
0.48404	42.25	40.5003	0.189994
0.48408	39.62	40.5353	0.189294
0.48412	42.49	40.5704	0.188592
0.48416	40.34	40.6055	0.18789
0.4842	42.16	40.6406	0.187187
0.48424	41.39	40.6758	0.186484
0.48428	40.91	40.711	0.185779
0.48432	42.64	40.7463	0.185075
0.48436	39.91	40.7815	0.184369
0.4844	43.12	40.8168	0.183663
0.48444	39.24	40.8522	0.182957
0.48448	43.4	40.8875	0.182249
0.48452	38.42	40.9229	0.181541
0.48456	43.55	40.9584	0.180833
0.4846	37.8	40.9938	0.180124
0.48464	43.21	41.0293	0.179414
0.48468	37.75	41.0648	0.178704
0.48472	42.64	41.1004	0.177993
0.48476	37.99	41.136	0.177281
0.4848	42.59	41.1716	0.176568
0.48484	38.19	41.2072	0.175855
0.48488	42.35	41.2429	0.175142
0.48492	39.05	41.2786	0.174428
0.48496	42.64	41.3144	0.173713
0.485	39.62	41.3501	0.172998
0.48504	43.12	41.3859	0.172282
0.48508	39.48	41.4217	0.171566
0.48512	43.4	41.4575	0.17085
0.48516	40.34	41.4933	0.170133
0.4852	43.74	41.5292	0.169416
0.48524	41.2	41.5651	0.168699
0.48528	43.31	41.6009	0.167982
0.48532	42.06	41.6368	0.167264
0.48536	42.49	41.6727	0.166546
0.4854	43.31	41.7086	0.165829
0.48544	41.11	41.7445	0.165111
0.48548	44.84	41.7804	0.164393
0.48552	40.2	41.8163	0.163674
0.48556	44.31	41.8522	0.162956
0.4856	39.14	41.8881	0.162238
0.48564	44.6	41.9241	0.161519
0.48568	38.81	41.96	0.1608
0.48572	44.17	41.996	0.160081
0.48576	38.42	42.0319	0.159362
0.4858	44.36	42.0679	0.158642
0.48584	38.71	42.1039	0.157922
0.48588	43.16	42.1399	0.157202
0.48592	39.62	42.1759	0.156482
0.48596	43.35	42.2119	0.155761
0.486	40.72	42.248	0.155041
0.48604	43.59	42.284	0.15432
0.48608	39.91	42.3201	0.153599
0.48612	44.22	42.3561	0.152878
0.48616	40.53	42.3922	0.152156
0.4862	44.55	42.4282	0.151435
0.48624	41.54	42.4643	0.150714
0.48628	44.17	42.5004	0.149992
0.48632	42.11	42.5364	0.149271
0.48636	43.74	42.5725	0.14855
0.4864	42.97	42.6086	0.147829
0.48644	43.31	42.6446	0.147108
0.48648	44.12	42.6807	0.146386
0.48652	42.06	42.7167	0.145666
0.48656	44.89	42.7528	0.144945
0.4866	41.3	42.7888	0.144224
0.48664	45.65	42.8248	0.143503
0.48668	40.29	42.8609	0.142783
0.48672	45.46	42.8969	0.142062
0.48676	39.72	42.9329	0.141341
0.4868	44.93	42.969	0.140621
0.48684	39.81	43.005	0.1399
0.48688	45.03	43.041	0.139179
0.48692	39.72	43.0771	0.138459
0.48696	44.31	43.1131	0.137738
0.487	40.29	43.1492	0.137017
0.48704	44.89	43.1852	0.136296
0.48708	40.91	43.2212	0.135575
0.48712	44.65	43.2573	0.134854
0.48716	41.06	43.2933	0.134134
0.4872	44.98	43.3293	0.133413
0.48724	41.97	43.3654	0.132692
0.48728	45.41	43.4014	0.131972
0.48732	42.88	43.4374	0.131252
0.48736	45.7	43.4734	0.130532
0.4874	43.07	43.5094	0.129812
0.48744	45.22	43.5454	0.129092
0.48748	43.98	43.5813	0.128373
0.48752	44.5	43.6173	0.127654
0.48756	44.93	43.6532	0.126935
0.4876	43.45	43.6892	0.126217
0.48764	46.18	43.7251	0.125498
0.48768	42.21	43.761	0.12478
0.48772	46.51	43.7969	0.124062
0.48776	41.15	43.8328	0.123344
0.4878	46.47	43.8687	0.122627
0.48784	40.91	43.9046	0.121909
0.48788	45.75	43.9404	0.121191
0.48792	40.77	43.9763	0.120474
0.48796	45.65	44.0122	0.119756
0.488	40.91	44.0481	0.119038
0.48804	45.65	44.084	0.11832
0.48808	40.91	44.1199	0.117602
0.48812	45.27	44.1558	0.116884
0.48816	41.49	44.1917	0.116166
0.4882	45.51	44.2276	0.115448
0.48824	41.92	44.2635	0.11473
0.48828	45.94	44.2994	0.114012
0.48832	42.68	44.3353	0.113293
0.48836	46.37	44.3712	0.112575
0.4884	43.31	44.4071	0.111857
0.48844	46.08	44.4431	0.111139
0.48848	43.88	44.479	0.110421
0.48852	45.89	44.5148	0.109703
0.48856	44.74	44.5507	0.108985
0.4886	45.75	44.5866	0.108268
0.48864	45.7	44.6225	0.10755
0.48868	44.65	44.6583	0.106833
0.48872	46.56	44.6942	0.106116
0.48876	43.88	44.7301	0.105399
0.4888	47.14	44.7659	0.104682
0.48884	42.21	44.8017	0.103965
0.48888	47.38	44.8376	0.103248
0.48892	41.39	44.8734	0.102531
0.48896	47.28	44.9093	0.101815
0.489	41.68	44.9451	0.101098
0.48904	46.85	44.981	0.100381
0.48908	41.11	45.0168	0.0996641
0.48912	46.08	45.0526	0.0989471
0.48916	41.82	45.0885	0.0982301
0.4892	46.32	45.1244	0.097513
0.48924	42.16	45.1602	0.0967959
0.48928	46.23	45.1961	0.0960788
0.48932	42.45	45.2319	0.0953618
0.48936	46.8	45.2678	0.0946449
0.4894	43.26	45.3036	0.0939281
0.48944	46.99	45.3394	0.0932115
0.48948	44.26	45.3752	0.0924951
0.48952	47.18	45.411	0.0917791
0.48956	44.36	45.4468	0.0910634
0.4896	47.76	45.4826	0.0903481
0.48964	45.94	45.5183	0.0896333
0.48968	46.8	45.554	0.0889191
0.48972	46.42	45.5897	0.0882053
0.48976	46.61	45.6254	0.0874921
0.4898	47.62	45.661	0.0867794
0.48984	44.41	45.6966	0.0860674
0.48988	48.05	45.7322	0.0853559
0.48992	43.88	45.7677	0.084645
0.48996	48.62	45.8033	0.0839347
0.49	43.21	45.8388	0.0832249
0.49004	48.05	45.8742	0.0825157
0.49008	42.83	45.9097	0.081807
0.49012	47.81	45.9451	0.0810988
0.49016	42.78	45.9804	0.0803911
0.4902	47.66	46.0158	0.079684
0.49024	43.07	46.0511	0.0789774
0.49028	47.76	46.0864	0.0782714
0.49032	43.4	46.1217	0.0775659
0.49036	47.42	46.157	0.076861
0.4904	43.98	46.1922	0.0761567
0.49044	47.66	46.2273	0.075453
0.49048	44.65	46.2625	0.0747501
0.49052	48	46.2976	0.0740478
0.49056	44.7	46.3327	0.0733463
0.4906	48.29	46.3677	0.0726456
0.49064	45.32	46.4027	0.0719457
0.49068	48.67	46.4377	0.0712466
0.49072	46.18	46.4726	0.0705485
0.49076	48	46.5074	0.0698512
0.4908	46.99	46.5423	0.0691549
0.49084	46.9	46.577	0.0684595
0.49088	48.24	46.6117	0.0677651
0.49092	46.27	46.6464	0.0670716
0.49096	48.81	46.681	0.0663791
0.491	44.84	46.7156	0.0656875
0.49104	49.29	46.7502	0.0649968
0.49108	44.26	46.7846	0.064307
0.49112	49.53	46.8191	0.0636181
0.49116	43.59	46.8535	0.0629301
0.4912	48.96	46.8879	0.0622429
0.49124	43.59	46.9222	0.0615566
0.49128	48.52	46.9564	0.060871
0.49132	43.79	46.9907	0.0601863
0.49136	48.48	47.0249	0.0595024
0.4914	44.31	47.059	0.0588194
0.49144	48.19	47.0931	0.0581372
0.49148	44.79	47.1272	0.0574558
0.49152	48.33	47.1612	0.0567754
0.49156	45.32	47.1952	0.0560959
0.4916	48.86	47.2291	0.0554173
0.49164	45.84	47.263	0.0547398
0.49168	49.34	47.2968	0.0540632
0.49172	46.27	47.3306	0.0533878
0.49176	49.34	47.3643	0.0527135
0.4918	46.99	47.398	0.0520403
0.49184	49.29	47.4316	0.0513683
0.49188	47.62	47.4651	0.0506974
0.49192	48.05	47.4986	0.0500277
0.49196	48.86	47.532	0.0493593
0.492	47.42	47.5654	0.048692
0.49204	49.96	47.5987	0.048026
0.49208	46.18	47.6319	0.0473611
0.49212	50.15	47.6651	0.0466974
0.49216	45.17	47.6983	0.0460348
0.4922	50.06	47.7313	0.0453733
0.49224	44.79	47.7644	0.044713
0.49228	49.91	47.7973	0.0440537
0.49232	44.6	47.8302	0.0433955
0.49236	49.96	47.8631	0.0427383
0.4924	44.74	47.8959	0.0420822
0.49244	49.48	47.9286	0.041427
0.49248	44.7	47.9614	0.040773
0.49252	49.43	47.994	0.0401199
0.49256	45.7	48.0266	0.0394679
0.4926	49.19	48.0592	0.0388169
0.49264	46.32	48.0916	0.0381671
0.49268	49.63	48.1241	0.0375184
0.49272	46.27	48.1565	0.0368708
0.49276	49.91	48.1888	0.0362243
0.4928	46.94	48.221	0.0355791
0.49284	50.68	48.2532	0.0349351
0.49288	47.62	48.2854	0.0342924
0.49292	50.06	48.3175	0.0336509
0.49296	49	48.3495	0.0330108
0.493	49.67	48.3814	0.0323719
0.49304	49.67	48.4133	0.0317343
0.49308	47.95	48.4451	0.0310981
0.49312	50.25	48.4768	0.0304631
0.49316	47.28	48.5085	0.0298294
0.4932	51.16	48.5402	0.0291969
0.49324	46.13	48.5717	0.0285656
0.49328	50.63	48.6032	0.0279355
0.49332	45.56	48.6347	0.0273066
0.49336	50.63	48.6661	0.0266788
0.4934	45.46	48.6974	0.0260521
0.49344	50.73	48.7287	0.0254265
0.49348	45.56	48.7599	0.0248019
0.49352	49.63	48.7911	0.0241784
0.49356	46.18	48.8222	0.023556
0.4936	50.2	48.8533	0.0229347
0.49364	46.42	48.8843	0.0223144
0.49368	50.06	48.9152	0.0216953
0.49372	46.71	48.9461	0.0210773
0.49376	50.1	48.977	0.0204604
0.4938	47.38	49.0078	0.0198448
0.49384	50.49	49.0385	0.0192303
0.49388	48.09	49.0691	0.0186171
0.49392	50.97	49.0997	0.0180053
0.49396	48.52	49.1303	0.0173947
0.494	51.01	49.1607	0.0167855
0.49404	48.96	49.1911	0.0161777
0.49408	50.63	49.2214	0.0155714
0.49412	50.54	49.2517	0.0149664
0.49416	49.34	49.2819	0.0143629
0.4942	52.07	49.312	0.0137607
0.49424	48.24	49.342	0.01316
0.49428	51.83	49.372	0.0125607
0.49432	47.23	49.4019	0.0119628
0.49436	52.31	49.4317	0.0113662
0.4944	46.8	49.4615	0.0107709
0.49444	51.49	49.4912	0.0101769
0.49448	46.32	49.5208	0.00958419
0.49452	51.73	49.5504	0.00899266
0.49456	46.08	49.5799	0.00840233
0.4946	51.59	49.6093	0.00781318
0.49464	46.85	49.6387	0.0072252
0.49468	50.68	49.6681	0.00663838
0.49472	47.14	49.6974	0.00605272
0.49476	50.1	49.7266	0.00546822
0.4948	47.47	49.7558	0.00488489
0.49484	51.25	49.7849	0.00430274
0.49488	47.9	49.8139	0.00372182
0.49492	51.73	49.8429	0.00314213
0.49496	48.29	49.8718	0.00256371
0.495	51.73	49.9007	0.00198659
0.49504	48.91	49.9295	0.00141079
0.49508	52.4	49.9582	0.000836342
0.49512	49.58	49.9868	0.000263256
0.49516	50.82	50.0154	-0.00030845
0.4952	50.77	50.0439	-0.000878768
0.49524	50.92	50.0724	-0.00144769
0.49528	51.68	50.1008	-0.00201523
0.49532	49.53	50.1291	-0.00258139
0.49536	52.07	50.1573	-0.00314618
0.4954	48.62	50.1855	-0.00370963
0.49544	52.83	50.2136	-0.00427175
0.49548	47.52	50.2416	-0.00483259
0.49552	53.65	50.2696	-0.00539216
0.49556	46.99	50.2975	-0.0059505
0.4956	52.78	50.3254	-0.00650764
0.49564	46.8	50.3532	-0.0070636
0.49568	51.68	50.3809	-0.00761841
0.49572	47.28	50.4086	-0.0081721
0.49576	52.26	50.4362	-0.00872466
0.4958	47.81	50.4638	-0.00927612
0.49584	51.35	50.4913	-0.00982646
0.49588	47.57	50.5188	-0.0103757
0.49592	52.11	50.5462	-0.0109238
0.49596	48.05	50.5735	-0.0114707
0.496	51.97	50.6008	-0.0120165
0.49604	49.24	50.6281	-0.0125611
0.49608	51.97	50.6552	-0.0131044
0.49612	49.91	50.6823	-0.0136465
0.49616	53.36	50.7094	-0.0141873
0.4962	50.92	50.7363	-0.0147268
0.49624	52.74	50.7632	-0.015265
0.49628	51.01	50.7901	-0.0158018
0.49632	51.97	50.8169	-0.0163373
0.49636	52.31	50.8436	-0.0168715
0.4964	49.96	50.8702	-0.0174043
0.49644	53.12	50.8968	-0.0179359
0.49648	49.34	50.9233	-0.0184663
0.49652	54.08	50.9498	-0.0189954
0.49656	48.52	50.9762	-0.0195233
0.4966	53.6	51.0025	-0.0200501
0.49664	48.48	51.0288	-0.0205758
0.49668	53.55	51.055	-0.0211004
0.49672	47.62	51.0812	-0.021624
0.49676	52.88	51.1073	-0.0221467
0.4968	48.09	51.1334	-0.0226684
0.49684	52.78	51.1595	-0.0231891
0.49688	48.62	51.1855	-0.023709
0.49692	52.26	51.2114	-0.0242281
0.49696	49	51.2373	-0.0247462
0.497	52.26	51.2632	-0.0252636
0.49704	49.34	51.289	-0.02578
0.49708	53.22	51.3148	-0.0262957
0.49712	49.58	51.3405	-0.0268105
0.49716	52.98	51.3662	-0.0273245
0.4972	49.86	51.3919	-0.0278376
0.49724	53.65	51.4175	-0.0283498
0.49728	50.87	51.4431	-0.0288612
0.49732	53.17	51.4686	-0.0293718
0.49736	51.4	51.4941	-0.0298815
0.4974	52.07	51.5195	-0.0303905
0.49744	52.64	51.5449	-0.0308986
0.49748	51.78	51.5703	-0.0314059
0.49752	53.65	51.5956	-0.0319125
0.49756	50.54	51.6209	-0.0324184
0.4976	53.84	51.6462	-0.0329236
0.49764	49.34	51.6714	-0.0334282
0.49768	54.46	51.6966	-0.0339322
0.49772	48.86	51.7218	-0.0344357
0.49776	53.93	51.7469	-0.0349387
0.4978	48.52	51.7721	-0.0354413
0.49784	53.89	51.7972	-0.0359435
0.49788	48.48	51.8223	-0.0364453
0.49792	53.36	51.8473	-0.0369468
0.49796	48.76	51.8724	-0.0374481
0.498	53.55	51.8975	-0.0379491
0.49804	49.34	51.9225	-0.0384499
0.49808	53.12	51.9475	-0.0389504
0.49812	49.77	51.9725	-0.0394508
0.49816	53.31	51.9975	-0.0399509
0.4982	50.34	52.0225	-0.0404508
0.49824	53.93	52.0475	-0.0409504
0.49828	50.54	52.0725	-0.0414499
0.49832	54.17	52.0975	-0.0419491
0.49836	51.54	52.1224	-0.0424481
0.4984	53.93	52.1473	-0.0429468
0.49844	52.26	52.1723	-0.0434454
0.49848	53.36	52.1972	-0.0439437
0.49852	53.12	52.2221	-0.0444418
0.49856	52.4	52.247	-0.0449398
0.4986	54.17	52.2719	-0.0454376
0.49864	50.58	52.2968	-0.0459354
0.49868	54.84	52.3217	-0.0464331
0.49872	49.82	52.3465	-0.0469308
0.49876	55.23	52.3714	-0.0474286
0.4988	49.67	52.3963	-0.0479265
0.49884	54.6	52.4212	-0.0484245
0.49888	49	52.4461	-0.0489226
0.49892	54.6	52.4711	-0.0494211
0.49896	48.96	52.496	-0.0499197
0.499	54.22	52.5209	-0.0504187
0.49904	48.76	52.5459	-0.0509181
0.49908	53.45	52.5709	-0.0514177
0.49912	49.72	52.5959	-0.0519178
0.49916	53.65	52.6209	-0.0524182
0.4992	50.34	52.6459	-0.0529189
0.49924	54.13	52.671	-0.05342
0.49928	51.16	52.6961	-0.0539214
0.49932	55.08	52.7212	-0.0544231
0.49936	50.87	52.7463	-0.0549251
0.4994	54.84	52.7714	-0.0554273
0.49944	51.59	52.7965	-0.0559298
0.49948	54.51	52.8216	-0.0564325
0.49952	52.83	52.8468	-0.0569354
0.49956	54.36	52.8719	-0.0574386
0.4996	53.74	52.8971	-0.057942
0.49964	52.88	52.9223	-0.0584456
0.49968	54.84	52.9475	-0.0589494
0.49972	52.02	52.9727	-0.0594535
0.49976	55.32	52.9979	-0.0599579
0.4998	51.21	53.0231	-0.0604626
0.49984	55.61	53.0484	-0.0609676
0.49988	50.92	53.0737	-0.0614731
0.49992	55.27	53.0989	-0.0619789
0.49996	49.91	53.1243	-0.0624852
0.5	55.37	53.1496	-0.062992
0.50004	49.91	53.175	-0.0634993
0.50008	54.6	53.2004	-0.0640071
0.50012	50.06	53.2258	-0.0645155
0.50016	54.17	53.2512	-0.0650245
0.5002	50.06	53.2767	-0.0655342
0.50024	54.41	53.3022	-0.0660444
0.50028	50.87	53.3278	-0.0665551
0.50032	54.46	53.3533	-0.0670665
0.50036	51.44	53.3789	-0.0675784
0.5004	54.84	53.4045	-0.0680908
0.50044	51.73	53.4302	-0.0686037
0.50048	55.61	53.4559	-0.0691171
0.50052	52.21	53.4815	-0.0696308
0.50056	55.08	53.5073	-0.070145
0.5006	52.88	53.533	-0.0706595
0.50064	55.23	53.5587	-0.0711744
0.50068	54.08	53.5845	-0.0716897
0.50072	54.65	53.6103	-0.0722052
0.50076	55.03	53.6361	-0.072721
0.5008	53.6	53.6619	-0.0732372
0.50084	55.75	53.6877	-0.0737536
0.50088	52.07	53.7135	-0.0742704
0.50092	56.37	53.7394	-0.0747876
0.50096	51.54	53.7653	-0.0753051
0.501	56.52	53.7912	-0.0758231
0.50104	50.82	53.8171	-0.0763414
0.50108	56.33	53.843	-0.0768602
0.50112	50.58	53.869	-0.0773796
0.50116	55.47	53.895	-0.0778994
0.5012	50.68	53.921	-0.0784197
0.50124	55.27	53.947	-0.0789406
0.50128	51.01	53.9731	-0.079462
0.50132	55.03	53.9992	-0.079984
0.50136	51.01	54.0253	-0.0805065
0.5014	55.37	54.0515	-0.0810296
0.50144	51.68	54.0777	-0.0815531
0.50148	55.42	54.1039	-0.0820771
0.50152	52.55	54.1301	-0.0826015
0.50156	56.09	54.1563	-0.0831263
0.5016	52.78	54.1826	-0.0836515
0.50164	56.09	54.2088	-0.084177
0.50168	53.55	54.2351	-0.0847028
0.50172	56.33	54.2614	-0.0852288
0.50176	54.27	54.2878	-0.0857551
0.5018	55.08	54.3141	-0.0862816
0.50184	55.32	54.3404	-0.0868084
0.50188	54.36	54.3668	-0.0873353
0.50192	56.33	54.3931	-0.0878624
0.50196	53.45	54.4195	-0.0883897
0.502	57.19	54.4459	-0.0889173
0.50204	52.11	54.4723	-0.0894451
0.50208	57.09	54.4987	-0.0899731
0.50212	52.11	54.5251	-0.0905014
0.50216	57	54.5515	-0.09103
0.5022	51.59	54.5779	-0.0915589
0.50224	56.66	54.6044	-0.0920881
0.50228	51.4	54.6309	-0.0926177
0.50232	56.18	54.6574	-0.0931476
0.50236	51.68	54.6839	-0.0936779
0.5024	55.7	54.7104	-0.0942086
0.50244	51.97	54.737	-0.0947397
0.50248	55.75	54.7636	-0.0952711
0.50252	52.74	54.7901	-0.0958029
0.50256	56.61	54.8167	-0.096335
0.5026	52.83	54.8434	-0.0968673
0.50264	56.42	54.87	-0.0973999
0.50268	53.41	54.8966	-0.0979328
0.50272	56.9	54.9233	-0.0984658
0.50276	54.08	54.95	-0.098999
0.5028	56.95	54.9766	-0.0995323
0.50284	54.89	55.0033	-0.100066
0.50288	56.09	55.03	-0.100599
0.50292	55.8	55.0566	-0.101133
0.50296	54.84	55.0833	-0.101667
0.503	57.09	55.11	-0.1022
0.50304	54.13	55.1367	-0.102734
0.50308	57.52	55.1634	-0.103268
0.50312	52.83	55.1901	-0.103802
0.50316	57.81	55.2168	-0.104337
0.5032	52.64	55.2435	-0.104871
0.50324	57.38	55.2703	-0.105405
0.50328	52.16	55.297	-0.10594
0.50332	56.33	55.3237	-0.106475
0.50336	52.21	55.3505	-0.10701
0.5034	57.09	55.3773	-0.107545
0.50344	52.83	55.404	-0.108081
0.50348	56.57	55.4308	-0.108616
0.50352	52.78	55.4576	-0.109152
0.50356	56.61	55.4844	-0.109688
0.5036	53.31	55.5112	-0.110223
0.50364	57.09	55.538	-0.110759
0.50368	53.98	55.5648	-0.111295
0.50372	57.28	55.5916	-0.111831
0.50376	54.22	55.6184	-0.112367
0.5038	57.62	55.6451	-0.112903
0.50384	54.84	55.6719	-0.113439
0.50388	57.81	55.6987	-0.113974
0.50392	55.61	55.7255	-0.114509
0.50396	57.43	55.7522	-0.115044
0.504	56.47	55.7789	-0.115579
0.50404	55.99	55.8057	-0.116113
0.50408	58.15	55.8324	-0.116648
0.50412	54.99	55.8591	-0.117182
0.50416	58.34	55.8858	-0.117716
0.5042	54.22	55.9125	-0.118249
0.50424	58	55.9391	-0.118782
0.50428	53.45	55.9658	-0.119316
0.50432	58.48	55.9924	-0.119849
0.50436	52.45	56.0191	-0.120382
0.5044	58.19	56.0457	-0.120914
0.50444	52.59	56.0724	-0.121447
0.50448	57.86	56.099	-0.12198
0.50452	53.02	56.1256	-0.122512
0.50456	56.85	56.1522	-0.123045
0.5046	53.69	56.1789	-0.123577
0.50464	57.14	56.2055	-0.12411
0.50468	54.03	56.2321	-0.124642
0.50472	57.72	56.2587	-0.125174
0.50476	54.6	56.2853	-0.125706
0.5048	58.29	56.3119	-0.126237
0.50484	54.13	56.3384	-0.126769
0.50488	58.43	56.365	-0.1273
0.50492	55.37	56.3916	-0.127831
0.50496	58.34	56.4181	-0.128362
0.505	56.04	56.4446	-0.128892
0.50504	58	56.4711	-0.129421
0.50508	57	56.4975	-0.129951
0.50512	57.38	56.524	-0.13048
0.50516	57.81	56.5504	-0.131008
0.5052	55.8	56.5768	-0.131536
0.50524	58.96	56.6032	-0.132064
0.50528	54.99	56.6295	-0.132591
0.50532	59.58	56.6559	-0.133118
0.50536	54.13	56.6822	-0.133644
0.5054	59.25	56.7085	-0.13417
0.50544	53.65	56.7348	-0.134696
0.50548	58.62	56.761	-0.135221
0.50552	54.03	56.7873	-0.135746
0.50556	58.53	56.8135	-0.136271
0.5056	53.79	56.8398	-0.136795
0.50564	58.24	56.866	-0.137319
0.50568	53.98	56.8922	-0.137843
0.50572	58.34	56.9183	-0.138367
0.50576	54.36	56.9445	-0.13889
0.5058	58.62	56.9706	-0.139413
0.50584	55.03	56.9968	-0.139935
0.50588	58.58	57.0229	-0.140458
0.50592	55.37	57.049	-0.140979
0.50596	58.62	57.075	-0.141501
0.506	55.99	57.1011	-0.142022
0.50604	59.49	57.1271	-0.142542
0.50608	56.14	57.1531	-0.143062
0.50612	58.82	57.1791	-0.143582
0.50616	58.34	57.205	-0.1441
0.5062	57.43	57.2309	-0.144619
0.50624	58.19	57.2568	-0.145136
0.50628	57.38	57.2827	-0.145654
0.50632	59.15	57.3085	-0.14617
0.50636	55.85	57.3343	-0.146686
0.5064	59.96	57.3601	-0.147202
0.50644	54.99	57.3859	-0.147717
0.50648	60.35	57.4116	-0.148232
0.50652	54.27	57.4373	-0.148746
0.50656	59.96	57.463	-0.14926
0.5066	53.93	57.4887	-0.149773
0.50664	59.68	57.5143	-0.150286
0.50668	54.46	57.54	-0.150799
0.50672	58.77	57.5656	-0.151312
0.50676	55.03	57.5912	-0.151824
0.5068	59.06	57.6168	-0.152335
0.50684	55.18	57.6423	-0.152847
0.50688	59.06	57.6679	-0.153358
0.50692	55.75	57.6934	-0.153868
0.50696	59.2	57.7189	-0.154379
0.507	55.99	57.7444	-0.154888
0.50704	59.92	57.7699	-0.155398
0.50708	56.52	57.7953	-0.155907
0.50712	60.01	57.8208	-0.156416
0.50716	57.19	57.8462	-0.156924
0.5072	59.73	57.8716	-0.157431
0.50724	58.24	57.8969	-0.157938
0.50728	58.77	57.9222	-0.158445
0.50732	59.15	57.9476	-0.158951
0.50736	57.76	57.9728	-0.159457
0.5074	60.16	57.9981	-0.159962
0.50744	56.42	58.0234	-0.160467
0.50748	60.4	58.0486	-0.160972
0.50752	55.9	58.0738	-0.161476
0.50756	60.92	58.099	-0.16198
0.5076	54.89	58.1242	-0.162483
0.50764	60.2	58.1493	-0.162987
0.50768	55.32	58.1745	-0.16349
0.50772	59.96	58.1996	-0.163993
0.50776	54.94	58.2248	-0.164496
0.5078	59.58	58.2499	-0.164999
0.50784	55.13	58.2751	-0.165501
0.50788	59.92	58.3002	-0.166004
0.50792	55.56	58.3253	-0.166507
0.50796	59.73	58.3505	-0.167009
0.508	56.18	58.3756	-0.167512
0.50804	59.73	58.4007	-0.168014
0.50808	56.37	58.4258	-0.168516
0.50812	60.06	58.4509	-0.169018
0.50816	57.14	58.476	-0.16952
0.5082	60.4	58.5011	-0.170022
0.50824	57.76	58.5262	-0.170523
0.50828	60.06	58.5512	-0.171025
0.50832	58.77	58.5763	-0.171526
0.50836	59.68	58.6013	-0.172027
0.5084	59.44	58.6264	-0.172527
0.50844	58.77	58.6514	-0.173028
0.50848	60.44	58.6764	-0.173528
0.50852	57.43	58.7014	-0.174028
0.50856	60.59	58.7264	-0.174527
0.5086	56.37	58.7513	-0.175027
0.50864	61.31	58.7763	-0.175526
0.50868	55.37	58.8013	-0.176026
0.50872	60.87	58.8262	-0.176525
0.50876	55.27	58.8512	-0.177024
0.5088	60.68	58.8761	-0.177523
0.50884	55.61	58.9011	-0.178022
0.50888	60.59	58.926	-0.178521
0.50892	55.8	58.951	-0.179019
0.50896	59.73	58.9759	-0.179518
0.509	56.28	59.0008	-0.180017
0.50904	59.63	59.0257	-0.180515
0.50908	57.09	59.0507	-0.181013
0.50912	60.16	59.0755	-0.181511
0.50916	57.43	59.1004	-0.182008
0.5092	61.45	59.1253	-0.182506
0.50924	57.72	59.1501	-0.183002
0.50928	61.54	59.1749	-0.183499
0.50932	58.53	59.1997	-0.183994
0.50936	60.92	59.2245	-0.18449
0.5094	59.34	59.2492	-0.184984
0.50944	60.35	59.2739	-0.185478
0.50948	60.49	59.2986	-0.185971
0.50952	58.91	59.3232	-0.186464
0.50956	61.02	59.3478	-0.186956
0.5096	58.43	59.3724	-0.187447
0.50964	62.17	59.3969	-0.187938
0.50968	57.57	59.4214	-0.188428
0.50972	61.78	59.4458	-0.188917
0.50976	56.52	59.4703	-0.189405
0.5098	62.84	59.4946	-0.189893
0.50984	56.09	59.519	-0.19038
0.50988	61.59	59.5433	-0.190866
0.50992	56.04	59.5676	-0.191352
0.50996	61.02	59.5918	-0.191837
0.51	56.81	59.6161	-0.192321
0.51004	61.16	59.6402	-0.192805
0.51008	56.66	59.6644	-0.193288
0.51012	61.16	59.6885	-0.19377
0.51016	57.09	59.7126	-0.194252
0.5102	61.02	59.7366	-0.194732
0.51024	57.95	59.7606	-0.195212
0.51028	61.88	59.7845	-0.195691
0.51032	58.48	59.8084	-0.196169
0.51036	61.64	59.8323	-0.196646
0.5104	59.29	59.8561	-0.197122
0.51044	61.69	59.8798	-0.197596
0.51048	60.06	59.9035	-0.19807
0.51052	61.26	59.9271	-0.198543
0.51056	60.44	59.9507	-0.199014
0.5106	60.2	59.9742	-0.199485
0.51064	61.83	59.9977	-0.199954
0.51068	59.29	60.0211	-0.200422
0.51072	62.69	60.0444	-0.200889
0.51076	57.91	60.0677	-0.201354
0.5108	62.93	60.0909	-0.201819
0.51084	57.14	60.1141	-0.202282
0.51088	62.65	60.1372	-0.202744
0.51092	57.19	60.1603	-0.203206
0.51096	62.41	60.1833	-0.203666
0.511	57.19	60.2062	-0.204125
0.51104	61.5	60.2291	-0.204582
0.51108	57.24	60.252	-0.205039
0.51112	61.69	60.2748	-0.205495
0.51116	57.52	60.2975	-0.20595
0.5112	61.45	60.3202	-0.206404
0.51124	57.91	60.3428	-0.206856
0.51128	62.12	60.3654	-0.207307
0.51132	58.58	60.3879	-0.207758
0.51136	62.36	60.4103	-0.208207
0.5114	58.62	60.4327	-0.208654
0.51144	62.5	60.455	-0.209101
0.51148	59.49	60.4773	-0.209546
0.51152	62.31	60.4995	-0.20999
0.51156	60.49	60.5216	-0.210432
0.5116	61.83	60.5437	-0.210874
0.51164	61.11	60.5657	-0.211313
0.51168	61.11	60.5876	-0.211752
0.51172	62.31	60.6094	-0.212189
0.51176	60.01	60.6312	-0.212624
0.5118	63.12	60.6529	-0.213058
0.51184	59.06	60.6746	-0.213491
0.51188	63.17	60.6961	-0.213923
0.51192	58.1	60.7176	-0.214353
0.51196	63.46	60.7391	-0.214782
0.512	57.43	60.7605	-0.215209
0.51204	62.79	60.7818	-0.215635
0.51208	57.48	60.803	-0.216061
0.51212	62.6	60.8242	-0.216484
0.51216	58.24	60.8454	-0.216907
0.5122	62.12	60.8664	-0.217329
0.51224	58	60.8874	-0.217749
0.51228	62.17	60.9084	-0.218168
0.51232	58.48	60.9293	-0.218586
0.51236	62.55	60.9501	-0.219003
0.5124	58.91	60.9709	-0.219418
0.51244	62.79	60.9916	-0.219832
0.51248	59.44	61.0123	-0.220245
0.51252	62.98	61.0328	-0.220657
0.51256	60.4	61.0533	-0.221067
0.5126	63.32	61.0738	-0.221476
0.51264	60.83	61.0942	-0.221883
0.51268	62.93	61.1145	-0.22229
0.51272	61.88	61.1347	-0.222694
0.51276	62.02	61.1549	-0.223098
0.5128	63.12	61.175	-0.2235
0.51284	60.25	61.195	-0.2239
0.51288	63.46	61.215	-0.2243
0.51292	59.25	61.2349	-0.224698
0.51296	63.84	61.2547	-0.225095
0.513	59.1	61.2745	-0.225491
0.51304	63.94	61.2943	-0.225885
0.51308	58.43	61.3139	-0.226279
0.51312	63.36	61.3336	-0.226671
0.51316	57.91	61.3531	-0.227063
0.5132	63.27	61.3727	-0.227453
0.51324	58.24	61.3921	-0.227843
0.51328	62.88	61.4116	-0.228232
0.51332	58.48	61.431	-0.22862
0.51336	62.93	61.4503	-0.229006
0.5134	58.86	61.4696	-0.229393
0.51344	63.03	61.4889	-0.229778
0.51348	59.82	61.5081	-0.230162
0.51352	62.98	61.5273	-0.230546
0.51356	59.82	61.5464	-0.230928
0.5136	63.46	61.5655	-0.23131
0.51364	60.68	61.5846	-0.231691
0.51368	63.89	61.6036	-0.232071
0.51372	60.97	61.6225	-0.232451
0.51376	63.22	61.6415	-0.232829
0.5138	62.12	61.6603	-0.233207
0.51384	62.31	61.6792	-0.233583
0.51388	62.74	61.698	-0.233959
0.51392	61.54	61.7167	-0.234335
0.51396	64.03	61.7355	-0.234709
0.514	60.54	61.7541	-0.235083
0.51404	64.27	61.7728	-0.235456
0.51408	59.39	61.7914	-0.235829
0.51412	64.37	61.81	-0.236201
0.51416	58.58	61.8286	-0.236572
0.5142	64.08	61.8472	-0.236943
0.51424	58.53	61.8657	-0.237314
0.51428	63.6	61.8842	-0.237685
0.51432	58.67	61.9027	-0.238055
0.51436	63.17	61.9212	-0.238425
0.5144	58.91	61.9397	-0.238795
0.51444	63.41	61.9582	-0.239164
0.51448	59.34	61.9767	-0.239534
0.51452	63.08	61.9951	-0.239903
0.51456	59.68	62.0136	-0.240272
0.5146	63.75	62.032	-0.240641
0.51464	60.11	62.0505	-0.24101
0.51468	63.84	62.0689	-0.241378
0.51472	60.97	62.0873	-0.241747
0.51476	64.18	62.1057	-0.242115
0.5148	61.21	62.1241	-0.242483
0.51484	63.7	62.1425	-0.242851
0.51488	62.6	62.1609	-0.243219
0.51492	62.88	62.1793	-0.243586
0.51496	63.36	62.1977	-0.243953
0.515	62.07	62.216	-0.244321
0.51504	64.66	62.2344	-0.244688
0.51508	60.87	62.2527	-0.245055
0.51512	64.85	62.2711	-0.245422
0.51516	59.87	62.2894	-0.245789
0.5152	65.04	62.3078	-0.246156
0.51524	59.39	62.3261	-0.246523
0.51528	64.27	62.3445	-0.24689
0.51532	59.25	62.3629	-0.247258
0.51536	64.18	62.3813	-0.247625
0.5154	58.96	62.3997	-0.247993
0.51544	63.6	62.4181	-0.248362
0.51548	59.53	62.4365	-0.24873
0.51552	63.75	62.455	-0.249099
0.51556	59.68	62.4734	-0.249469
0.5156	63.75	62.4919	-0.249838
0.51564	60.25	62.5104	-0.250208
0.51568	63.75	62.5289	-0.250579
0.51572	60.49	62.5475	-0.250949
0.51576	64.03	62.566	-0.25132
0.5158	61.5	62.5846	-0.251692
0.51584	64.56	62.6032	-0.252063
0.51588	61.59	62.6218	-0.252435
0.51592	63.89	62.6404	-0.252807
0.51596	62.31	62.659	-0.25318
0.516	63.65	62.6776	-0.253552
0.51604	63.84	62.6962	-0.253925
0.51608	62.98	62.7149	-0.254298
0.51612	64.7	62.7336	-0.254671
0.51616	61.54	62.7522	-0.255044
0.5162	65.18	62.7709	-0.255418
0.51624	61.07	62.7896	-0.255792
0.51628	65.57	62.8083	-0.256166
0.51632	59.96	62.827	-0.256541
0.51636	64.9	62.8458	-0.256916
0.5164	59.58	62.8646	-0.257291
0.51644	65.37	62.8833	-0.257667
0.51648	58.62	62.9022	-0.258043
0.51652	64.37	62.921	-0.25842
0.51656	59.68	62.9398	-0.258797
0.5166	64.23	62.9587	-0.259174
0.51664	60.63	62.9776	-0.259552
0.51668	64.13	62.9965	-0.259931
0.51672	60.59	63.0155	-0.26031
0.51676	64.42	63.0345	-0.260689
0.5168	61.5	63.0534	-0.261069
0.51684	65.04	63.0724	-0.261449
0.51688	61.45	63.0914	-0.261829
0.51692	65.28	63.1105	-0.262209
0.51696	62.02	63.1295	-0.26259
0.517	65.23	63.1486	-0.262971
0.51704	63.03	63.1676	-0.263352
0.51708	64.61	63.1867	-0.263734
0.51712	63.7	63.2058	-0.264115
0.51716	63.75	63.2249	-0.264497
0.5172	64.99	63.244	-0.264879
0.51724	62.6	63.2631	-0.265261
0.51728	65.95	63.2822	-0.265643
0.51732	61.5	63.3013	-0.266026
0.51736	65.76	63.3204	-0.266409
0.5174	60.78	63.3396	-0.266792
0.51744	65.71	63.3587	-0.267175
0.51748	60.54	63.3779	-0.267559
0.51752	65.47	63.3971	-0.267943
0.51756	60.01	63.4164	-0.268327
0.5176	65.23	63.4356	-0.268712
0.51764	59.82	63.4549	-0.269097
0.51768	64.85	63.4742	-0.269483
0.51772	60.83	63.4935	-0.269869
0.51776	64.7	63.5128	-0.270256
0.5178	61.07	63.5322	-0.270643
0.51784	64.51	63.5515	-0.271031
0.51788	61.21	63.5709	-0.271419
0.51792	65.09	63.5903	-0.271807
0.51796	62.02	63.6098	-0.272196
0.518	65.47	63.6292	-0.272584
0.51804	62.98	63.6487	-0.272974
0.51808	65.57	63.6682	-0.273363
0.51812	63.32	63.6876	-0.273753
0.51816	65.33	63.7071	-0.274143
0.5182	64.08	63.7266	-0.274533
0.51824	64.42	63.7462	-0.274923
0.51828	65.28	63.7657	-0.275314
0.51832	62.93	63.7852	-0.275704
0.51836	66.19	63.8048	-0.276095
0.5184	62.26	63.8243	-0.276486
0.51844	66.33	63.8439	-0.276877
0.51848	61.5	63.8634	-0.277269
0.51852	66.47	63.883	-0.277661
0.51856	60.92	63.9026	-0.278053
0.5186	66.28	63.9223	-0.278445
0.51864	60.54	63.9419	-0.278838
0.51868	65.9	63.9616	-0.279231
0.51872	60.68	63.9812	-0.279625
0.51876	65.33	64.0009	-0.280018
0.5188	61.26	64.0206	-0.280413
0.51884	65.04	64.0404	-0.280807
0.51888	61.69	64.0601	-0.281202
0.51892	65.28	64.0799	-0.281598
0.51896	62.12	64.0997	-0.281993
0.519	65.9	64.1195	-0.282389
0.51904	62.6	64.1393	-0.282786
0.51908	66.09	64.1591	-0.283182
0.51912	63.32	64.1789	-0.283579
0.51916	66.47	64.1988	-0.283976
0.5192	64.13	64.2186	-0.284373
0.51924	65.52	64.2385	-0.28477
0.51928	64.61	64.2584	-0.285168
0.51932	65.28	64.2783	-0.285565
0.51936	65.61	64.2982	-0.285963
0.5194	63.94	64.3181	-0.286361
0.51944	66.67	64.338	-0.286759
0.51948	62.5	64.3579	-0.287158
0.51952	66.95	64.3778	-0.287556
0.51956	61.83	64.3978	-0.287955
0.5196	66.76	64.4177	-0.288354
0.51964	61.26	64.4377	-0.288754
0.51968	66.33	64.4577	-0.289154
0.51972	60.83	64.4777	-0.289555
0.51976	65.9	64.4978	-0.289955
0.5198	61.02	64.5178	-0.290357
0.51984	65.8	64.5379	-0.290759
0.51988	61.59	64.558	-0.291161
0.51992	66.09	64.5782	-0.291564
0.51996	61.4	64.5983	-0.291967
0.52	65.76	64.6185	-0.29237
0.52004	62.6	64.6387	-0.292774
0.52008	65.95	64.6589	-0.293178
0.52012	63.22	64.6791	-0.293583
0.52016	66.14	64.6994	-0.293987
0.5202	63.51	64.7196	-0.294392
0.52024	66.91	64.7399	-0.294797
0.52028	64.37	64.7601	-0.295203
0.52032	66	64.7804	-0.295608
0.52036	65.33	64.8007	-0.296013
0.5204	65.33	64.8209	-0.296419
0.52044	66.38	64.8412	-0.296824
0.52048	64.51	64.8615	-0.297229
0.52052	67.34	64.8817	-0.297635
0.52056	63.36	64.902	-0.29804
0.5206	67.29	64.9223	-0.298445
0.52064	62.55	64.9425	-0.298851
0.52068	67.29	64.9628	-0.299256
0.52072	62.12	64.9831	-0.299661
0.52076	67.24	65.0033	-0.300067
0.5208	61.59	65.0236	-0.300472
0.52084	66.71	65.0439	-0.300878
0.52088	61.93	65.0642	-0.301283
0.52092	66.57	65.0844	-0.301689
0.52096	62.65	65.1047	-0.302094
0.521	66.24	65.125	-0.3025
0.52104	62.74	65.1453	-0.302905
0.52108	66.52	65.1655	-0.303311
0.52112	63.08	65.1858	-0.303716
0.52116	67	65.2061	-0.304122
0.5212	63.84	65.2263	-0.304527
0.52124	67.1	65.2466	-0.304932
0.52128	64.03	65.2668	-0.305336
0.52132	67.62	65.287	-0.30574
0.52136	65.09	65.3072	-0.306144
0.5214	67.29	65.3274	-0.306548
0.52144	66.04	65.3476	-0.306951
0.52148	65.8	65.3677	-0.307354
0.52152	67.19	65.3878	-0.307757
0.52156	64.85	65.4079	-0.308159
0.5216	67.72	65.428	-0.308561
0.52164	63.84	65.4481	-0.308962
0.52168	68.05	65.4682	-0.309363
0.52172	63.22	65.4882	-0.309764
0.52176	68.05	65.5082	-0.310164
0.5218	62.55	65.5282	-0.310565
0.52184	68.01	65.5482	-0.310965
0.52188	62.31	65.5682	-0.311364
0.52192	67.19	65.5882	-0.311764
0.52196	62.45	65.6082	-0.312164
0.522	67	65.6281	-0.312563
0.52204	62.74	65.6481	-0.312962
0.52208	67	65.6681	-0.313361
0.52212	63.46	65.688	-0.31376
0.52216	67.1	65.7079	-0.314159
0.5222	63.75	65.7279	-0.314557
0.52224	67.24	65.7478	-0.314956
0.52228	63.84	65.7677	-0.315354
0.52232	67.91	65.7876	-0.315752
0.52236	64.85	65.8075	-0.316149
0.5224	67.72	65.8273	-0.316547
0.52244	65.28	65.8472	-0.316944
0.52248	67.62	65.867	-0.317341
0.52252	66.04	65.8869	-0.317737
0.52256	66.81	65.9067	-0.318133
0.5226	67.29	65.9265	-0.318529
0.52264	65.76	65.9462	-0.318925
0.52268	68.49	65.966	-0.31932
0.52272	63.99	65.9857	-0.319715
0.52276	68.34	66.0055	-0.32011
0.5228	64.03	66.0252	-0.320504
0.52284	69.01	66.0449	-0.320899
0.52288	62.84	66.0646	-0.321293
0.52292	68.01	66.0844	-0.321687
0.52296	63.03	66.1041	-0.322081
0.523	67.67	66.1238	-0.322476
0.52304	62.88	66.1435	-0.32287
0.52308	67.29	66.1632	-0.323264
0.52312	63.27	66.1829	-0.323658
0.52316	67.43	66.2026	-0.324052
0.5232	63.6	66.2223	-0.324447
0.52324	67.82	66.242	-0.324841
0.52328	64.23	66.2618	-0.325235
0.52332	67.72	66.2815	-0.32563
0.52336	64.32	66.3012	-0.326024
0.5234	68.2	66.3209	-0.326418
0.52344	65.47	66.3406	-0.326812
0.52348	68.29	66.3603	-0.327206
0.52352	65.66	66.38	-0.3276
0.52356	68.1	66.3997	-0.327994
0.5236	66.67	66.4194	-0.328388
0.52364	67.43	66.4391	-0.328782
0.52368	67.96	66.4588	-0.329175
0.52372	66.38	66.4784	-0.329568
0.52376	68.96	66.4981	-0.329962
0.5238	65.23	66.5177	-0.330355
0.52384	69.25	66.5374	-0.330748
0.52388	64.23	66.557	-0.331141
0.52392	69.2	66.5767	-0.331534
0.52396	63.6	66.5964	-0.331927
0.524	68.96	66.616	-0.332321
0.52404	63.55	66.6357	-0.332714
0.52408	68.44	66.6554	-0.333108
0.52412	63.22	66.6751	-0.333502
0.52416	68.1	66.6948	-0.333896
0.5242	63.55	66.7145	-0.33429
0.52424	67.96	66.7342	-0.334685
0.52428	63.79	66.754	-0.33508
0.52432	67.77	66.7738	-0.335475
0.52436	64.56	66.7935	-0.335871
0.5244	67.91	66.8133	-0.336267
0.52444	64.85	66.8331	-0.336663
0.52448	68.68	66.853	-0.337059
0.52452	65.66	66.8728	-0.337456
0.52456	68.82	66.8926	-0.337852
0.5246	65.9	66.9125	-0.338249
0.52464	68.49	66.9323	-0.338646
0.52468	67.05	66.9522	-0.339043
0.52472	68.05	66.972	-0.339441
0.52476	67.67	66.9919	-0.339838
0.5248	67.14	67.0118	-0.340235
0.52484	68.68	67.0316	-0.340633
0.52488	65.85	67.0515	-0.341031
0.52492	69.49	67.0714	-0.341428
0.52496	64.56	67.0913	-0.341826
0.525	69.87	67.1112	-0.342224
0.52504	63.84	67.1311	-0.342622
0.52508	69.25	67.151	-0.343021
0.52512	63.75	67.171	-0.343419
0.52516	68.87	67.1909	-0.343818
0.5252	63.7	67.2109	-0.344217
0.52524	68.92	67.2308	-0.344617
0.52528	64.08	67.2508	-0.345016
0.52532	68.44	67.2708	-0.345416
0.52536	65.04	67.2908	-0.345816
0.5254	68.49	67.3108	-0.346216
0.52544	64.99	67.3308	-0.346616
0.52548	68.58	67.3508	-0.347016
0.52552	65.33	67.3708	-0.347416
0.52556	69.01	67.3908	-0.347816
0.5256	65.71	67.4108	-0.348216
0.52564	69.44	67.4308	-0.348616
0.52568	66.57	67.4508	-0.349016
0.52572	69.63	67.4708	-0.349416
0.52576	67.14	67.4907	-0.349815
0.5258	69.11	67.5107	-0.350214
0.52584	68.39	67.5306	-0.350613
0.52588	67.82	67.5505	-0.351011
0.52592	69.35	67.5704	-0.351409
0.52596	66.86	67.5903	-0.351806
0.526	70.4	67.6102	-0.352204
0.52604	66.28	67.63	-0.3526
0.52608	70.21	67.6498	-0.352997
0.52612	64.61	67.6696	-0.353393
0.52616	70.26	67.6894	-0.353789
0.5262	64.46	67.7092	-0.354184
0.52624	69.68	67.729	-0.354579
0.52628	64.42	67.7487	-0.354974
0.52632	69.68	67.7684	-0.355368
0.52636	64.9	67.7881	-0.355762
0.5264	68.58	67.8078	-0.356156
0.52644	65.33	67.8275	-0.35655
0.52648	69.01	67.8471	-0.356943
0.52652	65.33	67.8668	-0.357336
0.52656	68.87	67.8864	-0.357728
0.5266	66.24	67.906	-0.35812
0.52664	69.83	67.9256	-0.358511
0.52668	66.28	67.9451	-0.358902
0.52672	70.02	67.9646	-0.359292
0.52676	66.67	67.9841	-0.359682
0.5268	69.83	68.0036	-0.360071
0.52684	67.96	68.023	-0.360459
0.52688	69.39	68.0423	-0.360847
0.52692	68.53	68.0617	-0.361234
0.52696	68.34	68.081	-0.36162
0.527	69.16	68.1002	-0.362005
0.52704	67.43	68.1195	-0.362389
0.52708	70.45	68.1386	-0.362773
0.52712	66.47	68.1578	-0.363156
0.52716	70.59	68.1769	-0.363538
0.5272	65.57	68.1959	-0.363919
0.52724	70.88	68.2149	-0.364299
0.52728	66.14	68.2339	-0.364678
0.52732	70.35	68.2529	-0.365057
0.52736	65.28	68.2717	-0.365435
0.5274	69.92	68.2906	-0.365812
0.52744	65.13	68.3094	-0.366188
0.52748	70.35	68.3282	-0.366564
0.52752	65.61	68.3469	-0.366938
0.52756	69.97	68.3656	-0.367312
0.5276	66	68.3843	-0.367685
0.52764	69.59	68.4029	-0.368057
0.52768	66.04	68.4214	-0.368428
0.52772	70.06	68.4399	-0.368799
0.52776	67.1	68.4584	-0.369168
0.5278	70.5	68.4768	-0.369536
0.52784	67.29	68.4952	-0.369903
0.52788	70.35	68.5135	-0.370269
0.52792	68.29	68.5317	-0.370634
0.52796	70.54	68.5499	-0.370998
0.528	69.06	68.5681	-0.371361
0.52804	69.49	68.5861	-0.371723
0.52808	69.92	68.6042	-0.372083
0.52812	68.44	68.6221	-0.372443
0.52816	71.26	68.64	-0.372801
0.5282	67.24	68.6579	-0.373158
0.52824	71.21	68.6757	-0.373514
0.52828	66.33	68.6934	-0.373869
0.52832	71.31	68.7111	-0.374223
0.52836	65.76	68.7288	-0.374575
0.5284	71.12	68.7464	-0.374927
0.52844	64.8	68.7639	-0.375278
0.52848	70.64	68.7814	-0.375628
0.52852	65.47	68.7989	-0.375978
0.52856	70.21	68.8163	-0.376326
0.5286	65.8	68.8337	-0.376673
0.52864	69.92	68.851	-0.37702
0.52868	66.24	68.8683	-0.377366
0.52872	70.5	68.8855	-0.37771
0.52876	66.91	68.9027	-0.378054
0.5288	70.11	68.9199	-0.378397
0.52884	67.29	68.937	-0.378739
0.52888	70.97	68.954	-0.37908
0.52892	67.58	68.971	-0.37942
0.52896	71.41	68.988	-0.379759
0.529	68.77	69.0049	-0.380097
0.52904	70.73	69.0217	-0.380434
0.52908	69.2	69.0385	-0.38077
0.52912	70.21	69.0552	-0.381105
0.52916	70.16	69.0719	-0.381438
0.5292	69.3	69.0885	-0.381771
0.52924	71.02	69.1051	-0.382102
0.52928	67.67	69.1216	-0.382433
0.52932	71.64	69.1381	-0.382762
0.52936	67.19	69.1545	-0.383091
0.5294	71.74	69.1709	-0.383418
0.52944	66.43	69.1873	-0.383745
0.52948	71.17	69.2035	-0.384071
0.52952	65.76	69.2198	-0.384396
0.52956	71.41	69.236	-0.38472
0.5296	65.8	69.2522	-0.385043
0.52964	70.5	69.2683	-0.385366
0.52968	65.76	69.2844	-0.385688
0.52972	70.5	69.3005	-0.386009
0.52976	65.95	69.3165	-0.38633
0.5298	70.5	69.3325	-0.38665
0.52984	67.29	69.3484	-0.386969
0.52988	70.69	69.3644	-0.387287
0.52992	67.67	69.3802	-0.387605
0.52996	70.35	69.3961	-0.387921
0.53	67.96	69.4118	-0.388237
0.53004	71.6	69.4276	-0.388552
0.53008	68.63	69.4433	-0.388866
0.53012	71.41	69.4589	-0.389179
0.53016	69.06	69.4745	-0.38949
0.5302	70.73	69.4901	-0.389801
0.53024	70.64	69.5056	-0.390111
0.53028	69.92	69.521	-0.39042
0.53032	71.41	69.5364	-0.390727
0.53036	68.44	69.5517	-0.391034
0.5304	71.93	69.567	-0.39134
0.53044	67.91	69.5822	-0.391644
0.53048	72.36	69.5974	-0.391948
0.53052	66.71	69.6125	-0.39225
0.53056	72.27	69.6276	-0.392552
0.5306	66.28	69.6426	-0.392852
0.53064	71.98	69.6576	-0.393152
0.53068	66.47	69.6725	-0.39345
0.53072	71.21	69.6874	-0.393748
0.53076	66.67	69.7022	-0.394045
0.5308	70.93	69.717	-0.394341
0.53084	67.19	69.7318	-0.394636
0.53088	70.78	69.7465	-0.39493
0.53092	67.19	69.7612	-0.395223
0.53096	71.17	69.7758	-0.395516
0.531	67.82	69.7903	-0.395807
0.53104	71.6	69.8048	-0.396097
0.53108	67.86	69.8193	-0.396386
0.53112	72.22	69.8337	-0.396674
0.53116	68.82	69.8481	-0.396961
0.5312	72.12	69.8623	-0.397247
0.53124	69.59	69.8766	-0.397532
0.53128	71.36	69.8908	-0.397815
0.53132	70.69	69.9049	-0.398097
0.53136	70.64	69.9189	-0.398378
0.5314	71.69	69.9329	-0.398658
0.53144	69.25	69.9468	-0.398937
0.53148	72.65	69.9607	-0.399214
0.53152	67.86	69.9745	-0.39949
0.53156	72.55	69.9883	-0.399766
0.5316	67.34	70.002	-0.40004
0.53164	72.46	70.0156	-0.400312
0.53168	66.81	70.0292	-0.400584
0.53172	72.08	70.0428	-0.400855
0.53176	66.86	70.0563	-0.401125
0.5318	72.12	70.0697	-0.401394
0.53184	67.19	70.0831	-0.401662
0.53188	71.6	70.0964	-0.401929
[truncated: 23,003 more rows]

## Sheet: Sheet2
0.6418	50.82	49.9987	2.66058e-05	1.88589e-05
0.64184	47.81	49.9694	0.000611033	9.36327e-05
0.64188	51.3	49.9402	0.0011954	0.000167821
0.64192	48.09	49.911	0.00177974	0.000241455
0.64196	52.21	49.8818	0.00236411	0.000314568
0.642	48.96	49.8526	0.00294854	0.000387196
0.64204	52.02	49.8233	0.00353308	0.000459373
0.64208	49.24	49.7941	0.00411777	0.000531134
0.64212	51.3	49.7649	0.00470262	0.000602513
0.64216	50.2	49.7356	0.00528767	0.000673543
0.6422	50.15	49.7064	0.00587294	0.000744255
0.64224	51.59	49.6771	0.00645844	0.00081468
0.64228	48.91	49.6478	0.00704417	0.000884848
0.64232	51.4	49.6185	0.00763013	0.000954794
0.64236	48.09	49.5892	0.00821632	0.00102456
0.6424	52.5	49.5599	0.00880273	0.00109417
0.64244	47.33	49.5305	0.00938935	0.00116369
0.64248	52.16	49.5012	0.00997616	0.00123314
0.64252	46.23	49.4718	0.0105631	0.00130257
0.64256	51.83	49.4425	0.0111503	0.00137201
0.6426	46.47	49.4131	0.0117376	0.0014415
0.64264	51.21	49.3837	0.012325	0.00151108
0.64268	45.51	49.3544	0.0129125	0.00158079
0.64272	50.68	49.325	0.0135002	0.00165065
0.64276	46.32	49.2956	0.014088	0.00172069
0.6428	50.39	49.2662	0.0146759	0.00179096
0.64284	47.14	49.2368	0.015264	0.00186147
0.64288	50.77	49.2074	0.0158523	0.00193223
0.64292	46.9	49.178	0.0164408	0.00200326
0.64296	50.77	49.1485	0.0170296	0.00207455
0.643	47.57	49.1191	0.0176186	0.00214611
0.64304	51.06	49.0896	0.018208	0.00221791
0.64308	47.81	49.0601	0.0187978	0.00228994
0.64312	51.11	49.0306	0.0193879	0.00236217
0.64316	48.24	49.0011	0.0199784	0.0024346
0.6432	50.34	48.9715	0.0205694	0.00250721
0.64324	49.34	48.942	0.0211609	0.00258001
0.64328	50.82	48.9124	0.0217529	0.00265304
0.64332	49.86	48.8827	0.0223453	0.00272633
0.64336	49.43	48.8531	0.0229383	0.00279992
0.6434	50.34	48.8234	0.0235317	0.00287385
0.64344	47.76	48.7937	0.0241256	0.00294814
0.64348	51.49	48.764	0.02472	0.00302281
0.64352	46.85	48.7343	0.0253148	0.00309786
0.64356	51.16	48.7045	0.0259099	0.00317327
0.6436	46.75	48.6747	0.0265055	0.00324902
0.64364	50.87	48.6449	0.0271013	0.00332506
0.64368	45.37	48.6151	0.0276974	0.00340135
0.64372	50.54	48.5853	0.0282938	0.00347787
0.64376	44.98	48.5555	0.0288904	0.00355458
0.6438	49.58	48.5256	0.0294872	0.00363147
0.64384	45.32	48.4958	0.0300842	0.00370854
0.64388	50.01	48.4659	0.0306813	0.0037858
0.64392	45.65	48.4361	0.0312786	0.00386327
0.64396	49.53	48.4062	0.031876	0.00394097
0.644	46.32	48.3763	0.0324736	0.0040189
0.64404	49.19	48.3464	0.0330714	0.00409705
0.64408	46.18	48.3165	0.0336695	0.00417541
0.64412	49.77	48.2866	0.0342677	0.00425395
0.64416	46.66	48.2567	0.0348663	0.00433264
0.6442	50.34	48.2267	0.0354651	0.00441144
0.64424	47.42	48.1968	0.0360642	0.00449033
0.64428	50.2	48.1668	0.0366637	0.00456927
0.64432	47.62	48.1368	0.0372636	0.00464824
0.64436	49.15	48.1068	0.0378638	0.00472722
0.6444	48.81	48.0768	0.0384645	0.00480621
0.64444	48.67	48.0467	0.0390655	0.00488518
0.64448	49.82	48.0167	0.039667	0.0049641
0.64452	47.23	47.9866	0.0402688	0.00504296
0.64456	50.34	47.9564	0.040871	0.00512171
0.6446	46.56	47.9263	0.0414736	0.00520031
0.64464	50.39	47.8962	0.0420765	0.00527871
0.64468	45.03	47.866	0.0426798	0.00535683
0.64472	50.73	47.8358	0.0432833	0.00543463
0.64476	44.65	47.8056	0.043887	0.00551203
0.6448	49.77	47.7755	0.044491	0.00558898
0.64484	44.89	47.7452	0.0450951	0.00566544
0.64488	49.19	47.715	0.0456995	0.00574135
0.64492	44.65	47.6848	0.046304	0.00581669
0.64496	49.15	47.6546	0.0469086	0.0058914
0.645	44.84	47.6243	0.0475133	0.00596545
0.64504	48.86	47.5941	0.0481182	0.00603877
0.64508	44.79	47.5638	0.0487232	0.0061113
0.64512	49.24	47.5336	0.0493284	0.00618296
0.64516	45.32	47.5033	0.0499338	0.00625367
0.6452	48.81	47.473	0.0505393	0.00632337
0.64524	45.75	47.4427	0.051145	0.00639196
0.64528	49.77	47.4125	0.051751	0.00645939
0.64532	46.18	47.3821	0.0523572	0.00652557
0.64536	48.86	47.3518	0.0529637	0.00659047
0.6454	46.9	47.3215	0.0535705	0.00665402
0.64544	49.05	47.2911	0.0541775	0.00671617
0.64548	47.62	47.2608	0.0547849	0.00677688
0.64552	47.76	47.2304	0.0553926	0.0068361
0.64556	48.43	47.2	0.0560007	0.00689378
0.6456	46.47	47.1696	0.056609	0.00694987
0.64564	49.05	47.1391	0.0572176	0.00700432
0.64568	45.75	47.1087	0.0578265	0.00705709
0.64572	49.53	47.0782	0.0584357	0.00710815
0.64576	44.79	47.0477	0.0590451	0.00715745
0.6458	49.53	47.0173	0.0596547	0.00720496
0.64584	43.93	46.9868	0.0602645	0.00725067
0.64588	49.34	46.9563	0.0608744	0.00729456
0.64592	43.69	46.9258	0.0614845	0.00733663
0.64596	48.52	46.8953	0.0620946	0.00737686
0.646	43.12	46.8648	0.0627049	0.00741526
0.64604	48	46.8342	0.0633153	0.00745182
0.64608	44.26	46.8037	0.0639258	0.00748655
0.64612	48.24	46.7732	0.0645363	0.00751944
0.64616	44.46	46.7426	0.065147	0.0075505
0.6462	47.95	46.7121	0.0657578	0.00757974
0.64624	45.17	46.6816	0.0663688	0.00760714
0.64628	48.48	46.651	0.0669799	0.00763273
0.64632	43.93	46.6204	0.0675912	0.00765652
0.64636	48.52	46.5899	0.0682028	0.00767852
0.6464	45.22	46.5593	0.0688146	0.00769874
0.64644	48.91	46.5287	0.0694267	0.00771721
0.64648	45.99	46.498	0.0700391	0.00773395
0.64652	48.38	46.4674	0.0706519	0.00774896
0.64656	46.47	46.4368	0.0712649	0.00776225
0.6466	47.38	46.4061	0.0718784	0.00777384
0.64664	47.95	46.3754	0.0724921	0.00778372
0.64668	46.04	46.3447	0.0731062	0.00779191
0.64672	48.91	46.314	0.0737206	0.00779839
0.64676	44.84	46.2832	0.0743354	0.00780318
0.6468	48.62	46.2525	0.0749504	0.00780629
0.64684	44.17	46.2217	0.0755657	0.00780771
0.64688	49.19	46.1909	0.0761811	0.00780747
0.64692	43.4	46.1602	0.0767968	0.00780559
0.64696	47.85	46.1294	0.0774125	0.00780207
0.647	42.54	46.0986	0.0780284	0.00779695
0.64704	48.05	46.0678	0.0786444	0.00779024
0.64708	42.59	46.037	0.0792604	0.00778196
0.64712	46.99	46.0062	0.0798764	0.00777211
0.64716	43.21	45.9754	0.0804924	0.00776071
0.6472	47.52	45.9446	0.0811084	0.00774777
0.64724	43.21	45.9138	0.0817245	0.00773331
0.64728	46.99	45.883	0.0823405	0.00771736
0.64732	43.55	45.8522	0.0829566	0.00769993
0.64736	47.71	45.8214	0.0835728	0.00768104
0.6474	43.55	45.7905	0.084189	0.00766072
0.64744	47.47	45.7597	0.0848053	0.00763901
0.64748	44.65	45.7289	0.0854218	0.00761592
0.64752	48.09	45.6981	0.0860383	0.00759149
0.64756	45.08	45.6672	0.0866551	0.00756575
0.6476	47.38	45.6364	0.087272	0.00753871
0.64764	45.41	45.6055	0.0878891	0.0075104
0.64768	46.04	45.5747	0.0885065	0.00748082
0.64772	46.42	45.5438	0.089124	0.00745
0.64776	46.04	45.5129	0.0897417	0.00741796
0.6478	47.52	45.482	0.0903595	0.0073847
0.64784	44.5	45.4511	0.0909776	0.00735026
0.64788	47.57	45.4202	0.0915958	0.00731466
0.64792	42.64	45.3893	0.0922141	0.00727793
0.64796	48.14	45.3584	0.0928325	0.00724011
0.648	42.21	45.3275	0.0934509	0.00720124
0.64804	47.9	45.2965	0.0940694	0.00716135
0.64808	42.16	45.2656	0.0946879	0.00712046
0.64812	46.9	45.2347	0.0953063	0.00707861
0.64816	41.97	45.2038	0.0959248	0.00703583
0.6482	46.85	45.1728	0.0965431	0.00699212
0.64824	42.25	45.1419	0.0971615	0.00694751
0.64828	45.75	45.111	0.0977797	0.00690201
0.64832	42.3	45.0801	0.0983979	0.00685564
0.64836	46.42	45.0492	0.0990161	0.00680843
0.6484	42.49	45.0183	0.0996342	0.0067604
0.64844	46.47	44.9874	0.100252	0.00671158
0.64848	42.97	44.9565	0.10087	0.006662
0.64852	47.18	44.9256	0.101489	0.00661171
0.64856	43.16	44.8946	0.102107	0.00656073
0.6486	46.9	44.8637	0.102725	0.00650909
0.64864	43.98	44.8328	0.103344	0.00645683
0.64868	46.51	44.8019	0.103963	0.00640398
0.64872	44.79	44.7709	0.104582	0.00635056
0.64876	45.99	44.7399	0.105201	0.00629662
0.6488	45.7	44.709	0.105821	0.00624217
0.64884	45.03	44.678	0.10644	0.00618726
0.64888	46.51	44.647	0.10706	0.00613191
0.64892	43.59	44.616	0.10768	0.00607615
0.64896	47.33	44.585	0.108301	0.00602002
0.649	42.21	44.5539	0.108921	0.00596355
0.64904	46.94	44.5229	0.109542	0.00590679
0.64908	42.11	44.4918	0.110163	0.00584978
0.64912	46.85	44.4608	0.110784	0.00579256
0.64916	41.49	44.4297	0.111405	0.00573516
0.6492	46.61	44.3987	0.112027	0.00567762
0.64924	41.06	44.3676	0.112648	0.00562
0.64928	46.18	44.3365	0.113269	0.00556234
0.64932	40.87	44.3055	0.113891	0.00550468
0.64936	45.37	44.2744	0.114512	0.00544707
0.6494	41.39	44.2433	0.115134	0.00538958
0.64944	45.32	44.2122	0.115755	0.00533224
0.64948	41.92	44.1812	0.116377	0.00527512
0.64952	45.32	44.1501	0.116998	0.00521824
0.64956	41.82	44.119	0.11762	0.00516166
0.6496	45.89	44.0879	0.118242	0.00510541
0.64964	42.64	44.0568	0.118863	0.00504951
0.64968	45.75	44.0257	0.119486	0.004994
0.64972	42.97	43.9946	0.120108	0.0049389
0.64976	45.6	43.9635	0.120731	0.00488424
0.6498	43.64	43.9323	0.121353	0.00483004
0.64984	45.6	43.9012	0.121977	0.00477633
0.64988	44.46	43.87	0.1226	0.00472315
0.64992	44.98	43.8388	0.123224	0.00467053
0.64996	45.32	43.8076	0.123848	0.0046185
0.65	42.97	43.7764	0.124473	0.00456711
0.65004	46.13	43.7451	0.125098	0.00451638
0.65008	42.4	43.7139	0.125723	0.00446634
0.65012	46.04	43.6826	0.126348	0.00441703
0.65016	41.25	43.6513	0.126974	0.00436845
0.6502	46.04	43.62	0.1276	0.00432064
0.65024	41.06	43.5887	0.128226	0.00427361
0.65028	46.04	43.5574	0.128852	0.00422738
0.65032	40.34	43.5261	0.129479	0.00418196
0.65036	45.08	43.4947	0.130105	0.00413739
0.6504	40.24	43.4634	0.130732	0.00409369
0.65044	44.6	43.4321	0.131359	0.00405088
0.65048	40.34	43.4007	0.131986	0.00400902
0.65052	44.98	43.3694	0.132613	0.00396812
0.65056	40.67	43.338	0.13324	0.00392822
0.6506	44.55	43.3066	0.133867	0.00388937
0.65064	40.87	43.2753	0.134494	0.00385159
0.65068	44.93	43.2439	0.135122	0.00381491
0.65072	41.73	43.2125	0.135749	0.00377936
0.65076	45.46	43.1811	0.136377	0.00374496
0.6508	41.73	43.1497	0.137005	0.00371174
0.65084	45.03	43.1183	0.137634	0.00367971
0.65088	42.35	43.0869	0.138262	0.00364891
0.65092	44.98	43.0555	0.138891	0.00361934
0.65096	42.83	43.024	0.13952	0.00359105
0.651	43.79	42.9925	0.140149	0.00356406
0.65104	43.79	42.961	0.140779	0.00353841
0.65108	43.07	42.9295	0.141409	0.00351411
0.65112	44.7	42.898	0.142039	0.00349119
0.65116	41.82	42.8665	0.14267	0.00346968
0.6512	46.13	42.835	0.143301	0.0034496
0.65124	40.91	42.8034	0.143932	0.00343095
0.65128	45.41	42.7719	0.144563	0.00341376
0.65132	40.1	42.7403	0.145194	0.00339805
0.65136	44.93	42.7087	0.145826	0.00338384
0.6514	39.38	42.6771	0.146457	0.00337115
0.65144	44.79	42.6456	0.147089	0.00336001
0.65148	39.29	42.614	0.147721	0.00335043
0.65152	44.26	42.5824	0.148352	0.00334245
0.65156	39.48	42.5508	0.148984	0.00333608
0.6516	43.59	42.5192	0.149615	0.00333135
0.65164	39.91	42.4877	0.150247	0.00332828
0.65168	43.5	42.4561	0.150878	0.00332691
0.65172	40.05	42.4245	0.151509	0.00332725
0.65176	43.69	42.393	0.152141	0.00332934
0.6518	40.15	42.3614	0.152772	0.00333321
0.65184	43.69	42.3298	0.153403	0.00333888
0.65188	40.67	42.2983	0.154035	0.0033464
0.65192	44.12	42.2667	0.154666	0.00335579
0.65196	41.06	42.2351	0.155297	0.00336711
0.652	44.17	42.2036	0.155929	0.0033804
0.65204	41.58	42.172	0.15656	0.0033957
0.65208	44.46	42.1404	0.157192	0.00341305
0.65212	42.49	42.1088	0.157824	0.00343251
0.65216	42.54	42.0772	0.158456	0.00345412
0.6522	43.83	42.0456	0.159088	0.00347792
0.65224	41.73	42.014	0.159721	0.00350397
0.65228	44.07	41.9823	0.160353	0.00353232
0.65232	40	41.9507	0.160986	0.00356303
0.65236	44.6	41.9191	0.161618	0.00359616
0.6524	39.38	41.8875	0.162251	0.00363178
0.65244	44.5	41.8558	0.162883	0.00366995
0.65248	38.66	41.8242	0.163516	0.00371075
0.65252	44.03	41.7926	0.164148	0.00375424
0.65256	38.52	41.761	0.164781	0.0038005
0.6526	42.92	41.7294	0.165413	0.00384961
0.65264	38.47	41.6978	0.166045	0.00390163
0.65268	43.07	41.6662	0.166677	0.00395665
0.65272	38.95	41.6346	0.167309	0.00401474
0.65276	42.73	41.603	0.16794	0.00407597
0.6528	39.53	41.5714	0.168572	0.0041404
0.65284	42.68	41.5398	0.169203	0.00420813
0.65288	39.67	41.5083	0.169834	0.00427922
0.65292	43.31	41.4767	0.170465	0.00435376
0.65296	39.67	41.4452	0.171096	0.00443184
0.653	43.59	41.4136	0.171727	0.00451355
0.65304	39.91	41.3821	0.172358	0.00459899
0.65308	43.55	41.3505	0.172989	0.00468825
0.65312	40.39	41.319	0.17362	0.00478142
0.65316	42.73	41.2874	0.174251	0.0048786
0.6532	40.87	41.2559	0.174882	0.00497988
0.65324	42.54	41.2244	0.175513	0.00508535
0.65328	42.64	41.1928	0.176144	0.00519509
0.65332	41.01	41.1613	0.176775	0.00530921
0.65336	42.68	41.1297	0.177406	0.00542779
0.6534	40.1	41.0982	0.178037	0.00555091
0.65344	43.79	41.0666	0.178668	0.00567867
0.65348	38.95	41.0351	0.179298	0.00581116
0.65352	43.45	41.0035	0.179929	0.00594848
0.65356	38.09	40.972	0.18056	0.00609072
0.6536	43.5	40.9405	0.18119	0.00623799
0.65364	36.99	40.909	0.18182	0.00639037
0.65368	42.92	40.8775	0.18245	0.00654797
0.65372	37.56	40.846	0.18308	0.0067109
0.65376	41.87	40.8145	0.183709	0.00687925
0.6538	37.8	40.7831	0.184338	0.00705311
0.65384	41.68	40.7516	0.184967	0.00723259
0.65388	38.38	40.7202	0.185596	0.0074178
0.65392	41.54	40.6888	0.186224	0.00760883
0.65396	38.57	40.6574	0.186852	0.0078058
0.654	42.16	40.626	0.18748	0.0080088
0.65404	38.38	40.5946	0.188107	0.00821796
0.65408	42.4	40.5633	0.188735	0.00843337
0.65412	39.05	40.5319	0.189362	0.00865514
0.65416	42.83	40.5006	0.189989	0.00888339
0.6542	39.53	40.4692	0.190616	0.00911821
0.65424	42.73	40.4379	0.191243	0.0093597
0.65428	40.67	40.4065	0.19187	0.00960798
0.65432	42.16	40.3752	0.192497	0.00986314
0.65436	41.2	40.3438	0.193123	0.0101253
0.6544	40.1	40.3125	0.19375	0.0103945
0.65444	42.45	40.2812	0.194377	0.0106709
0.65448	39.09	40.2498	0.195004	0.0109546
0.65452	42.88	40.2185	0.19563	0.0112457
0.65456	38.38	40.1872	0.196257	0.0115443
0.6546	42.59	40.1558	0.196883	0.0118506
0.65464	36.94	40.1245	0.197509	0.0121645
0.65468	42.25	40.0932	0.198135	0.0124862
0.65472	37.08	40.062	0.198761	0.0128158
0.65476	41.82	40.0307	0.199386	0.0131534
0.6548	36.46	39.9994	0.200011	0.013499
0.65484	41.15	39.9682	0.200636	0.0138528
0.65488	36.84	39.937	0.201261	0.0142148
0.65492	41.39	39.9058	0.201885	0.0145851
0.65496	37.18	39.8746	0.202509	0.0149639
0.655	41.06	39.8434	0.203132	0.0153511
0.65504	37.56	39.8122	0.203755	0.0157469
0.65508	41.06	39.7811	0.204378	0.0161513
0.65512	37.66	39.75	0.205001	0.0165644
0.65516	41.73	39.7189	0.205623	0.0169863
0.6552	38.04	39.6878	0.206245	0.0174171
0.65524	41.78	39.6567	0.206867	0.0178568
0.65528	38.33	39.6256	0.207489	0.0183055
0.65532	41.3	39.5945	0.20811	0.0187632
0.65536	39.57	39.5634	0.208732	0.0192299
0.6554	41.11	39.5323	0.209353	0.0197057
0.65544	40.15	39.5013	0.209975	0.0201907
0.65548	40.1	39.4702	0.210596	0.0206847
0.65552	40.34	39.4391	0.211217	0.0211878
0.65556	38.71	39.4081	0.211838	0.0217001
0.6556	41.87	39.377	0.21246	0.0222214
0.65564	37.8	39.346	0.21308	0.0227518
0.65568	41.68	39.3149	0.213701	0.0232912
0.65572	36.7	39.2839	0.214322	0.0238396
0.65576	41.25	39.2529	0.214942	0.024397
0.6558	36.32	39.2219	0.215563	0.0249632
0.65584	41.25	39.1909	0.216183	0.0255382
0.65588	35.12	39.1599	0.216803	0.0261219
0.65592	40.91	39.1289	0.217422	0.0267142
0.65596	36.22	39.0979	0.218041	0.0273151
0.656	40.05	39.067	0.218661	0.0279243
0.65604	36.8	39.036	0.219279	0.0285418
0.65608	40.1	39.0051	0.219898	0.0291674
0.65612	36.56	38.9742	0.220516	0.0298011
0.65616	40.53	38.9433	0.221134	0.0304425
0.6562	36.51	38.9124	0.221752	0.0310916
0.65624	40.58	38.8815	0.22237	0.0317482
0.65628	37.42	38.8506	0.222988	0.032412
0.65632	40.72	38.8197	0.223606	0.0330828
0.65636	37.42	38.7888	0.224224	0.0337603
0.6564	40.72	38.7579	0.224841	0.0344443
0.65644	38.38	38.727	0.225459	0.0351345
0.65648	40	38.6962	0.226077	0.0358306
0.65652	39.48	38.6653	0.226695	0.0365323
0.65656	38.76	38.6344	0.227313	0.0372393
0.6566	39.96	38.6034	0.227931	0.0379513
0.65664	38.81	38.5725	0.228549	0.038668
0.65668	40.67	38.5416	0.229168	0.0393891
0.65672	36.99	38.5107	0.229786	0.0401143
0.65676	41.25	38.4798	0.230405	0.0408432
0.6568	36.32	38.4488	0.231024	0.0415756
0.65684	41.2	38.4179	0.231642	0.0423109
0.65688	35.36	38.3869	0.232261	0.0430489
0.65692	40.58	38.356	0.23288	0.0437891
0.65696	35.12	38.3251	0.233499	0.044531
0.657	39.72	38.2941	0.234117	0.0452743
0.65704	34.98	38.2632	0.234736	0.0460184
0.65708	39.96	38.2323	0.235355	0.046763
0.65712	35.55	38.2013	0.235973	0.0475074
0.65716	39.33	38.1704	0.236591	0.0482514
0.6572	35.31	38.1395	0.23721	0.0489942
0.65724	39.48	38.1086	0.237828	0.0497355
0.65728	36.51	38.0777	0.238446	0.0504747
0.65732	39.67	38.0468	0.239065	0.0512112
0.65736	36.51	38.0158	0.239683	0.0519445
0.6574	39.48	37.9849	0.240301	0.0526739
0.65744	36.94	37.954	0.24092	0.0533987
0.65748	40.1	37.9231	0.241538	0.0541184
0.65752	37.13	37.8921	0.242157	0.0548322
0.65756	39.38	37.8612	0.242776	0.0555393
0.6576	38.23	37.8303	0.243395	0.0562391
0.65764	39	37.7993	0.244014	0.0569308
0.65768	38.9	37.7683	0.244633	0.0576136
0.65772	37.61	37.7374	0.245253	0.0582868
0.65776	39.48	37.7064	0.245872	0.0589496
0.6578	36.17	37.6754	0.246492	0.0596011
0.65784	40.34	37.6444	0.247111	0.0602404
0.65788	35.03	37.6134	0.247731	0.0608668
0.65792	40.05	37.5825	0.248351	0.0614793
0.65796	34.36	37.5515	0.24897	0.062077
0.658	39.91	37.5205	0.24959	0.062659
0.65804	33.88	37.4895	0.25021	0.0632242
0.65808	39.48	37.4585	0.250829	0.0637716
0.65812	34.26	37.4276	0.251449	0.0643003
0.65816	38.95	37.3966	0.252068	0.0648093
0.6582	33.97	37.3657	0.252687	0.0652974
0.65824	38.28	37.3347	0.253306	0.0657636
0.65828	34.5	37.3038	0.253925	0.0662067
0.65832	38.23	37.2728	0.254544	0.0666259
0.65836	35.27	37.2419	0.255162	0.06702
0.6584	38.62	37.2109	0.255781	0.0673882
0.65844	35.55	37.18	0.2564	0.0677299
0.65848	39.09	37.1491	0.257019	0.0680444
0.65852	35.65	37.1181	0.257637	0.0683314
0.65856	38.86	37.0872	0.258256	0.0685907
0.6586	35.94	37.0562	0.258875	0.0688225
0.65864	39.14	37.0253	0.259494	0.0690268
0.65868	36.56	36.9943	0.260114	0.0692043
0.65872	38.47	36.9633	0.260733	0.0693555
0.65876	37.95	36.9323	0.261353	0.0694813
0.6588	37.32	36.9013	0.261973	0.0695823
0.65884	38.86	36.8703	0.262594	0.0696597
0.65888	35.65	36.8393	0.263214	0.0697145
0.65892	39.67	36.8082	0.263835	0.0697478
0.65896	34.88	36.7772	0.264456	0.0697608
0.659	39.62	36.7461	0.265077	0.0697547
0.65904	34.12	36.7151	0.265699	0.0697306
0.65908	38.86	36.684	0.26632	0.0696899
0.65912	33.64	36.6529	0.266942	0.0696337
0.65916	38.33	36.6218	0.267563	0.0695633
0.6592	33.49	36.5907	0.268185	0.0694799
0.65924	38.19	36.5597	0.268807	0.0693845
0.65928	33.59	36.5286	0.269429	0.0692783
0.65932	37.66	36.4975	0.270051	0.0691625
0.65936	32.97	36.4664	0.270672	0.0690378
0.6594	37.85	36.4353	0.271294	0.0689054
0.65944	34.5	36.4042	0.271916	0.0687661
0.65948	37.28	36.3731	0.272538	0.0686209
0.65952	34.16	36.342	0.273161	0.0684705
0.65956	37.47	36.3109	0.273783	0.0683158
0.6596	34.69	36.2797	0.274405	0.0681577
0.65964	38.52	36.2486	0.275028	0.067997
0.65968	35.5	36.2174	0.275651	0.0678344
0.65972	38.66	36.1863	0.276274	0.0676707
0.65976	35.7	36.1551	0.276898	0.0675067
0.6598	37.9	36.1239	0.277522	0.067343
0.65984	36.65	36.0927	0.278146	0.0671804
0.65988	36.56	36.0615	0.278771	0.0670195
0.65992	37.8	36.0302	0.279395	0.0668609
0.65996	35.7	35.999	0.280021	0.0667052
0.66	38.52	35.9677	0.280646	0.0665531
0.66004	34.74	35.9364	0.281272	0.0664051
0.66008	38.33	35.9051	0.281898	0.0662618
0.66012	33.69	35.8738	0.282525	0.0661239
0.66016	38.38	35.8424	0.283151	0.0659919
0.6602	32.54	35.8111	0.283778	0.0658665
0.66024	38.04	35.7798	0.284405	0.0657482
0.66028	32.68	35.7484	0.285032	0.0656376
0.66032	37.61	35.717	0.285659	0.0655352
0.66036	32.49	35.6857	0.286286	0.0654415
0.6604	36.94	35.6543	0.286913	0.0653569
0.66044	33.06	35.623	0.28754	0.065282
0.66048	36.99	35.5916	0.288167	0.0652171
0.66052	32.73	35.5603	0.288794	0.0651627
0.66056	36.61	35.5289	0.289421	0.065119
0.6606	33.3	35.4976	0.290048	0.0650866
0.66064	37.04	35.4662	0.290675	0.0650656
0.66068	33.93	35.4349	0.291302	0.0650564
0.66072	37.37	35.4035	0.291929	0.0650593
0.66076	34.4	35.3722	0.292556	0.0650745
0.6608	37.08	35.3408	0.293184	0.0651022
0.66084	34.55	35.3095	0.293811	0.0651426
0.66088	37.18	35.2781	0.294438	0.0651959
0.66092	35.27	35.2467	0.295066	0.0652622
0.66096	35.84	35.2154	0.295693	0.0653416
0.661	36.27	35.184	0.29632	0.0654341
0.66104	35.27	35.1526	0.296948	0.0655399
0.66108	36.89	35.1212	0.297576	0.0656589
0.66112	33.93	35.0898	0.298203	0.0657911
0.66116	37.28	35.0585	0.298831	0.0659367
0.6612	32.87	35.0271	0.299458	0.0660956
0.66124	37.42	34.9957	0.300086	0.0662677
0.66128	31.82	34.9643	0.300713	0.066453
0.66132	37.8	34.933	0.30134	0.0666515
0.66136	31.53	34.9016	0.301967	0.066863
0.6614	36.99	34.8703	0.302594	0.0670875
0.66144	31.34	34.839	0.30322	0.0673248
0.66148	35.98	34.8077	0.303846	0.0675748
0.66152	31.96	34.7764	0.304472	0.0678373
0.66156	35.55	34.7451	0.305098	0.0681123
0.6616	31.96	34.7139	0.305723	0.0683994
0.66164	35.5	34.6826	0.306348	0.0686984
0.66168	32.3	34.6514	0.306972	0.0690093
0.66172	35.94	34.6202	0.307597	0.0693317
0.66176	33.25	34.589	0.308221	0.0696654
0.6618	36.46	34.5578	0.308845	0.0700102
0.66184	32.97	34.5266	0.309469	0.0703658
0.66188	36.46	34.4954	0.310092	0.0707319
0.66192	33.45	34.4642	0.310716	0.0711083
0.66196	36.46	34.4331	0.311339	0.0714945
0.662	34.26	34.4019	0.311962	0.0718904
0.66204	35.55	34.3707	0.312585	0.0722955
0.66208	35.22	34.3396	0.313208	0.0727095
0.66212	34.4	34.3084	0.313831	0.073132
0.66216	36.17	34.2773	0.314454	0.0735627
0.6622	33.78	34.2462	0.315077	0.074001
0.66224	36.89	34.215	0.3157	0.0744467
0.66228	32.2	34.1839	0.316322	0.074899
0.66232	36.46	34.1528	0.316944	0.0753577
0.66236	31.44	34.1217	0.317566	0.0758222
0.6624	36.41	34.0906	0.318188	0.076292
0.66244	30.77	34.0595	0.31881	0.0767665
0.66248	35.79	34.0284	0.319431	0.0772451
0.66252	30.29	33.9974	0.320052	0.0777274
0.66256	35.5	33.9664	0.320673	0.0782125
0.6626	30.96	33.9353	0.321293	0.0787
0.66264	35.31	33.9043	0.321913	0.0791891
0.66268	31.29	33.8734	0.322533	0.0796791
0.66272	34.5	33.8424	0.323152	0.0801694
0.66276	31.53	33.8114	0.323771	0.0806592
0.6628	35.07	33.7805	0.32439	0.0811479
0.66284	31.53	33.7496	0.325008	0.0816348
0.66288	35.55	33.7187	0.325626	0.0821193
0.66292	32.2	33.6878	0.326244	0.0826006
0.66296	35.36	33.6569	0.326862	0.0830781
0.663	32.54	33.626	0.327479	0.0835511
0.66304	35.36	33.5952	0.328097	0.084019
0.66308	33.64	33.5643	0.328714	0.0844811
0.66312	34.93	33.5334	0.329331	0.084937
0.66316	33.64	33.5026	0.329949	0.0853862
0.6632	33.97	33.4717	0.330566	0.0858282
0.66324	34.93	33.4408	0.331183	0.0862626
0.66328	33.02	33.41	0.3318	0.0866894
0.66332	35.31	33.3791	0.332418	0.0871083
0.66336	31.48	33.3483	0.333035	0.0875193
0.6634	36.32	33.3174	0.333652	0.0879225
0.66344	30.57	33.2866	0.334269	0.0883178
0.66348	36.13	33.2557	0.334886	0.0887054
0.66352	30.29	33.2249	0.335503	0.0890855
0.66356	35.27	33.194	0.33612	0.0894581
0.6636	29.9	33.1632	0.336736	0.0898236
0.66364	35.03	33.1324	0.337353	0.0901822
0.66368	30.14	33.1015	0.337969	0.0905341
0.66372	34.4	33.0707	0.338585	0.0908796
0.66376	30.19	33.0399	0.339201	0.0912191
0.6638	33.83	33.0091	0.339817	0.0915528
0.66384	30.29	32.9784	0.340433	0.0918813
0.66388	34.4	32.9476	0.341049	0.0922047
0.66392	30.72	32.9168	0.341664	0.0925235
0.66396	34.64	32.886	0.34228	0.0928379
0.664	31.87	32.8552	0.342895	0.0931483
0.66404	34.45	32.8245	0.343511	0.0934548
0.66408	31.68	32.7937	0.344126	0.0937576
0.66412	35.22	32.7629	0.344742	0.0940569
0.66416	32.15	32.7321	0.345358	0.0943528
0.6642	34.4	32.7013	0.345974	0.0946453
0.66424	33.3	32.6705	0.34659	0.0949345
0.66428	33.45	32.6397	0.347206	0.0952204
0.66432	34.26	32.6089	0.347823	0.0955031
0.66436	32.44	32.578	0.348439	0.0957826
0.6644	35.22	32.5472	0.349056	0.0960591
0.66444	31.34	32.5164	0.349673	0.0963326
0.66448	34.5	32.4855	0.35029	0.0966031
0.66452	30.19	32.4547	0.350907	0.0968709
0.66456	34.64	32.4238	0.351524	0.0971359
0.6646	29.71	32.393	0.35214	0.0973983
0.66464	34.55	32.3621	0.352757	0.0976581
0.66468	28.95	32.3313	0.353374	0.0979154
0.66472	33.97	32.3005	0.353991	0.0981702
0.66476	28.95	32.2696	0.354607	0.0984226
0.6648	33.49	32.2388	0.355224	0.0986726
0.66484	29.71	32.208	0.35584	0.0989203
0.66488	33.25	32.1772	0.356456	0.0991657
0.66492	29.57	32.1464	0.357071	0.0994088
0.66496	33.49	32.1157	0.357687	0.0996497
0.665	29.81	32.0849	0.358302	0.0998884
0.66504	33.59	32.0541	0.358918	0.100125
0.66508	30.05	32.0234	0.359533	0.100359
0.66512	33.78	31.9926	0.360148	0.100591
0.66516	30.38	31.9619	0.360763	0.100821
0.6652	33.88	31.9311	0.361378	0.101049
0.66524	31.15	31.9004	0.361992	0.101275
0.66528	33.49	31.8696	0.362607	0.101498
0.66532	31.82	31.8389	0.363222	0.101719
0.66536	33.3	31.8082	0.363837	0.101937
0.6654	32.68	31.7774	0.364452	0.102153
0.66544	32.2	31.7467	0.365066	0.102365
0.66548	33.3	31.7159	0.365681	0.102575
0.66552	30.81	31.6852	0.366296	0.102782
0.66556	34.26	31.6545	0.366911	0.102985
0.6656	29.71	31.6237	0.367525	0.103185
0.66564	34.16	31.593	0.36814	0.103382
0.66568	28.95	31.5623	0.368754	0.103575
0.66572	33.88	31.5316	0.369369	0.103764
0.66576	28.13	31.5009	0.369983	0.103949
0.6658	33.73	31.4702	0.370596	0.10413
0.66584	28.9	31.4395	0.37121	0.104307
0.66588	32.35	31.4088	0.371823	0.104481
0.66592	28.13	31.3782	0.372436	0.104651
0.66596	33.02	31.3476	0.373048	0.104817
0.666	28.56	31.317	0.373661	0.10498
0.66604	32.58	31.2864	0.374272	0.10514
0.66608	28.85	31.2558	0.374884	0.105298
0.66612	32.25	31.2253	0.375495	0.105453
0.66616	29.23	31.1947	0.376106	0.105606
0.6662	32.49	31.1642	0.376716	0.105757
0.66624	29.62	31.1337	0.377326	0.105907
0.66628	32.97	31.1032	0.377936	0.106055
0.66632	30.34	31.0727	0.378546	0.106202
0.66636	32.39	31.0422	0.379155	0.106349
0.6664	30.48	31.0118	0.379765	0.106494
0.66644	32.68	30.9813	0.380374	0.106639
0.66648	31.53	30.9509	0.380982	0.106784
0.66652	31.48	30.9204	0.381591	0.106928
0.66656	32.49	30.89	0.382199	0.107071
0.6666	30.72	30.8596	0.382808	0.107214
0.66664	33.02	30.8292	0.383416	0.107357
0.66668	29.66	30.7988	0.384024	0.107499
0.66672	33.73	30.7685	0.384631	0.107641
0.66676	28.56	30.7381	0.385238	0.107783
0.6668	33.11	30.7077	0.385845	0.107924
0.66684	27.18	30.6774	0.386451	0.108064
0.66688	33.45	30.6471	0.387057	0.108204
0.66692	27.22	30.6169	0.387663	0.108343
0.66696	32.25	30.5866	0.388268	0.108481
0.667	27.32	30.5564	0.388872	0.108618
0.66704	31.91	30.5262	0.389476	0.108754
0.66708	27.51	30.496	0.390079	0.108888
0.66712	31.91	30.4659	0.390682	0.109021
0.66716	27.99	30.4358	0.391284	0.109151
0.6672	32.15	30.4057	0.391886	0.10928
0.66724	28.09	30.3757	0.392486	0.109407
0.66728	31.96	30.3457	0.393087	0.109532
0.66732	28.32	30.3157	0.393686	0.109654
0.66736	32.2	30.2857	0.394285	0.109774
0.6674	28.99	30.2558	0.394884	0.109892
0.66744	32.15	30.2259	0.395482	0.110007
0.66748	29.47	30.1961	0.396079	0.110119
0.66752	31.87	30.1662	0.396676	0.110228
0.66756	30.1	30.1364	0.397272	0.110335
0.6676	31.05	30.1066	0.397868	0.110439
0.66764	31.29	30.0769	0.398463	0.11054
0.66768	29.57	30.0471	0.399057	0.110639
0.66772	32.01	30.0174	0.399651	0.110735
0.66776	28.95	29.9878	0.400244	0.110829
0.6678	32.11	29.9582	0.400837	0.11092
0.66784	27.27	29.9286	0.401429	0.11101
0.66788	32.68	29.899	0.40202	0.111097
0.66792	27.13	29.8695	0.40261	0.111182
0.66796	31.96	29.84	0.4032	0.111266
0.668	26.75	29.8106	0.403788	0.111348
0.66804	31.44	29.7812	0.404376	0.111429
0.66808	26.41	29.7518	0.404963	0.111509
0.66812	31.1	29.7226	0.405549	0.111587
0.66816	26.36	29.6933	0.406134	0.111665
0.6682	30.77	29.6641	0.406718	0.111743
0.66824	26.7	29.6349	0.407301	0.11182
0.66828	31.1	29.6058	0.407883	0.111896
0.66832	27.61	29.5768	0.408464	0.111972
0.66836	30.53	29.5478	0.409045	0.112047
0.6684	27.46	29.5188	0.409624	0.112123
0.66844	30.81	29.4899	0.410203	0.112197
0.66848	28.09	29.461	0.41078	0.112272
0.66852	31.1	29.4321	0.411357	0.112345
0.66856	28.13	29.4033	0.411933	0.112419
0.6686	31.48	29.3746	0.412509	0.112491
0.66864	28.76	29.3458	0.413083	0.112563
0.66868	31.2	29.3171	0.413657	0.112634
0.66872	30	29.2885	0.414231	0.112704
0.66876	29.9	29.2598	0.414803	0.112774
0.6688	30.91	29.2312	0.415375	0.112842
0.66884	28.23	29.2027	0.415947	0.112909
0.66888	31.39	29.1741	0.416517	0.112974
0.66892	27.27	29.1456	0.417087	0.113039
0.66896	31.87	29.1172	0.417657	0.113102
0.669	26.55	29.0887	0.418225	0.113165
0.66904	31.63	29.0604	0.418793	0.113226
0.66908	25.55	29.032	0.41936	0.113287
0.66912	30.91	29.0037	0.419926	0.113347
0.66916	25.02	28.9754	0.420492	0.113406
0.6692	30.86	28.9472	0.421056	0.113465
0.66924	26.22	28.919	0.42162	0.113524
0.66928	30.29	28.8909	0.422183	0.113583
0.66932	26.31	28.8628	0.422745	0.113642
0.66936	29.66	28.8347	0.423306	0.113701
0.6694	26.41	28.8067	0.423867	0.113761
0.66944	30.67	28.7787	0.424427	0.113821
0.66948	26.89	28.7507	0.424986	0.113882
0.66952	30.29	28.7228	0.425544	0.113944
0.66956	26.98	28.6949	0.426102	0.114006
0.6696	30.48	28.6671	0.426659	0.11407
0.66964	27.56	28.6392	0.427215	0.114135
0.66968	30.77	28.6114	0.427771	0.1142
0.66972	28.42	28.5837	0.428327	0.114266
0.66976	30.05	28.5559	0.428881	0.114333
0.6698	29.52	28.5282	0.429436	0.114401
0.66984	28.85	28.5005	0.42999	0.11447
0.66988	30	28.4728	0.430543	0.11454
0.66992	27.89	28.4452	0.431096	0.11461
0.66996	30.77	28.4176	0.431648	0.114681
0.67	26.41	28.39	0.4322	0.114754
0.67004	30.96	28.3624	0.432751	0.114827
0.67008	25.88	28.3349	0.433302	0.114901
0.67012	31.05	28.3074	0.433852	0.114976
0.67016	25.45	28.2799	0.434401	0.115053
0.6702	29.81	28.2525	0.43495	0.115131
0.67024	24.83	28.2251	0.435498	0.11521
0.67028	29.71	28.1977	0.436045	0.115292
0.67032	24.78	28.1704	0.436592	0.115375
0.67036	29.43	28.1431	0.437138	0.11546
0.6704	24.59	28.1158	0.437683	0.115548
0.67044	29.52	28.0886	0.438228	0.115638
0.67048	25.6	28.0614	0.438771	0.115731
0.67052	29.57	28.0343	0.439314	0.115828
0.67056	26.51	28.0072	0.439857	0.115927
0.6706	29.23	27.9801	0.440399	0.11603
0.67064	26.6	27.953	0.44094	0.116136
0.67068	29.66	27.9259	0.441481	0.116247
0.67072	26.84	27.8989	0.442021	0.116361
0.67076	30.05	27.8719	0.442561	0.116479
0.6708	27.13	27.845	0.443101	0.116602
0.67084	29.47	27.818	0.44364	0.116729
0.67088	28.71	27.7911	0.444178	0.116861
0.67092	28.47	27.7642	0.444717	0.116997
0.67096	29.47	27.7373	0.445255	0.117138
0.671	27.46	27.7104	0.445792	0.117284
0.67104	29.71	27.6835	0.446329	0.117434
0.67108	26.12	27.6567	0.446866	0.117589
0.67112	30.24	27.6299	0.447402	0.117749
0.67116	25.17	27.6031	0.447938	0.117913
0.6712	30	27.5763	0.448473	0.118081
0.67124	24.59	27.5496	0.449008	0.118254
0.67128	29.62	27.5229	0.449542	0.11843
0.67132	24.45	27.4962	0.450076	0.118611
0.67136	29.19	27.4695	0.450609	0.118795
0.6714	24.21	27.4429	0.451142	0.118982
0.67144	28.9	27.4163	0.451673	0.119172
0.67148	24.59	27.3898	0.452205	0.119364
0.67152	28.52	27.3632	0.452735	0.119559
0.67156	24.64	27.3367	0.453265	0.119755
0.6716	28.61	27.3103	0.453795	0.119953
0.67164	25.45	27.2838	0.454323	0.120151
0.67168	28.95	27.2574	0.454852	0.120351
0.67172	25.02	27.231	0.455379	0.120551
0.67176	29.14	27.2047	0.455906	0.120752
0.6718	25.93	27.1784	0.456433	0.120952
0.67184	29.19	27.152	0.456959	0.121153
0.67188	26.75	27.1258	0.457485	0.121353
0.67192	28.61	27.0995	0.45801	0.121553
0.67196	27.7	27.0732	0.458535	0.121754
0.672	28.13	27.047	0.45906	0.121954
0.67204	28.28	27.0208	0.459584	0.122155
0.67208	26.51	26.9946	0.460107	0.122355
0.67212	28.66	26.9685	0.46063	0.122556
0.67216	25.4	26.9423	0.461153	0.122758
0.6722	29.43	26.9162	0.461675	0.12296
0.67224	24.64	26.8901	0.462197	0.123163
0.67228	29.28	26.8641	0.462718	0.123368
0.67232	23.92	26.838	0.463239	0.123573
0.67236	28.85	26.812	0.463759	0.123779
0.6724	23.63	26.7861	0.464279	0.123986
0.67244	28.99	26.7601	0.464798	0.124195
0.67248	23.25	26.7342	0.465316	0.124405
0.67252	27.85	26.7083	0.465833	0.124616
0.67256	23.54	26.6825	0.46635	0.124829
0.6726	28.13	26.6567	0.466867	0.125042
0.67264	23.83	26.6309	0.467382	0.125257
0.67268	27.7	26.6051	0.467897	0.125472
0.67272	24.4	26.5794	0.468412	0.125688
0.67276	28.37	26.5537	0.468925	0.125905
0.6728	25.02	26.5281	0.469439	0.126122
0.67284	28.85	26.5024	0.469951	0.126339
0.67288	25.31	26.4768	0.470464	0.126556
0.67292	28.42	26.4512	0.470975	0.126773
0.67296	25.02	26.4257	0.471487	0.126989
0.673	28.42	26.4001	0.471998	0.127205
0.67304	26.17	26.3746	0.472508	0.12742
0.67308	27.7	26.3491	0.473018	0.127634
0.67312	27.27	26.3236	0.473528	0.127846
0.67316	26.46	26.2981	0.474038	0.128057
0.6732	28.23	26.2727	0.474546	0.128266
0.67324	25.26	26.2472	0.475055	0.128473
0.67328	28.66	26.2218	0.475563	0.128679
0.67332	24.06	26.1965	0.476071	0.128883
0.67336	28.52	26.1711	0.476578	0.129085
0.6734	23.3	26.1458	0.477085	0.129285
0.67344	28.9	26.1205	0.477591	0.129484
0.67348	22.96	26.0952	0.478096	0.129681
0.67352	28.13	26.0699	0.478601	0.129877
0.67356	22.82	26.0447	0.479106	0.130072
0.6736	27.42	26.0195	0.479609	0.130266
0.67364	23.15	25.9944	0.480112	0.130459
0.67368	27.22	25.9693	0.480615	0.130652
0.67372	23.54	25.9442	0.481117	0.130845
0.67376	27.42	25.9191	0.481618	0.131038
0.6738	23.25	25.8941	0.482118	0.131231
0.67384	26.98	25.8691	0.482618	0.131424
0.67388	23.92	25.8442	0.483117	0.131618
0.67392	27.65	25.8192	0.483615	0.131812
0.67396	24.16	25.7943	0.484113	0.132007
0.674	27.99	25.7695	0.484611	0.132203
0.67404	24.59	25.7446	0.485108	0.1324
0.67408	27.51	25.7198	0.485604	0.132597
0.67412	25.74	25.695	0.4861	0.132794
0.67416	27.22	25.6702	0.486595	0.132992
0.6742	26.27	25.6455	0.48709	0.133191
0.67424	26.12	25.6208	0.487585	0.133389
0.67428	27.18	25.5961	0.488078	0.133588
0.67432	24.88	25.5714	0.488572	0.133786
0.67436	27.89	25.5468	0.489065	0.133984
0.6744	23.68	25.5222	0.489557	0.134182
0.67444	27.99	25.4976	0.490049	0.134379
0.67448	22.72	25.473	0.49054	0.134575
0.67452	27.85	25.4485	0.49103	0.13477
0.67456	22.48	25.424	0.49152	0.134964
0.6746	27.27	25.3996	0.492009	0.135157
0.67464	22.05	25.3751	0.492497	0.135349
0.67468	27.08	25.3508	0.492984	0.13554
0.67472	22.25	25.3264	0.493471	0.13573
0.67476	26.84	25.3022	0.493957	0.135919
0.6748	22.1	25.2779	0.494442	0.136107
0.67484	26.6	25.2537	0.494926	0.136294
0.67488	22.48	25.2295	0.49541	0.13648
0.67492	26.75	25.2054	0.495892	0.136667
0.67496	22.68	25.1813	0.496374	0.136852
0.675	26.75	25.1572	0.496855	0.137038
0.67504	23.73	25.1332	0.497335	0.137224
0.67508	26.98	25.1092	0.497815	0.13741
0.67512	23.78	25.0853	0.498294	0.137597
0.67516	26.94	25.0614	0.498772	0.137784
0.6752	24.21	25.0375	0.49925	0.137972
0.67524	26.98	25.0136	0.499727	0.138161
0.67528	24.83	24.9898	0.500204	0.138352
0.67532	25.88	24.966	0.50068	0.138543
0.67536	26.36	24.9422	0.501155	0.138736
0.6754	24.26	24.9185	0.50163	0.138931
0.67544	27.03	24.8948	0.502104	0.139128
0.67548	23.39	24.8711	0.502578	0.139327
0.67552	27.08	24.8475	0.503051	0.139528
0.67556	22.25	24.8238	0.503523	0.139731
0.6756	27.7	24.8003	0.503995	0.139936
0.67564	21.67	24.7767	0.504466	0.140145
0.67568	26.89	24.7532	0.504936	0.140355
0.67572	21.38	24.7297	0.505406	0.140569
0.67576	26.41	24.7063	0.505875	0.140785
0.6758	22.1	24.6828	0.506343	0.141005
0.67584	26.51	24.6595	0.506811	0.141228
0.67588	21.53	24.6361	0.507277	0.141454
0.67592	25.36	24.6128	0.507743	0.141684
0.67596	22.1	24.5896	0.508209	0.141917
0.676	26.03	24.5663	0.508673	0.142154
0.67604	22.1	24.5431	0.509137	0.142396
0.67608	26.17	24.52	0.509601	0.142641
0.67612	22.82	24.4968	0.510063	0.142891
0.67616	26.51	24.4737	0.510525	0.143145
0.6762	22.82	24.4507	0.510987	0.143403
0.67624	26.84	24.4276	0.511448	0.143667
0.67628	23.73	24.4046	0.511908	0.143935
0.67632	25.84	24.3816	0.512369	0.144208
0.67636	24.59	24.3586	0.512828	0.144487
0.6764	25.69	24.3356	0.513287	0.144771
0.67644	25.26	24.3127	0.513746	0.14506
0.67648	24.5	24.2898	0.514205	0.145355
0.67652	26.03	24.2669	0.514663	0.145656
0.67656	23.2	24.244	0.51512	0.145963
0.6766	26.51	24.2211	0.515577	0.146276
0.67664	21.67	24.1983	0.516034	0.146594
0.67668	27.08	24.1755	0.51649	0.146919
0.67672	21.05	24.1527	0.516946	0.14725
0.67676	26.36	24.13	0.517401	0.147587
0.6768	21	24.1072	0.517855	0.14793
0.67684	25.93	24.0845	0.518309	0.148279
0.67688	21.24	24.0619	0.518762	0.148635
0.67692	25.4	24.0392	0.519215	0.148996
0.67696	21.24	24.0166	0.519667	0.149364
0.677	24.97	23.9941	0.520119	0.149737
0.67704	21.53	23.9715	0.52057	0.150116
0.67708	24.83	23.949	0.52102	0.150501
0.67712	21.58	23.9265	0.52147	0.150892
0.67716	25.17	23.9041	0.521919	0.151288
0.6772	22.25	23.8816	0.522367	0.151689
0.67724	25.12	23.8592	0.522816	0.152096
0.67728	22.44	23.8368	0.523263	0.152508
0.67732	25.36	23.8145	0.523711	0.152925
0.67736	22.87	23.7921	0.524157	0.153347
0.6774	25.98	23.7698	0.524604	0.153774
0.67744	23.68	23.7475	0.52505	0.154206
0.67748	25.21	23.7252	0.525496	0.154644
0.67752	24.83	23.7029	0.525942	0.155087
0.67756	24.21	23.6806	0.526387	0.155534
0.6776	25.26	23.6584	0.526832	0.155987
0.67764	23.15	23.6361	0.527277	0.156446
0.67768	26.12	23.6139	0.527722	0.156909
0.67772	22.01	23.5917	0.528166	0.157378
0.67776	25.93	23.5695	0.52861	0.157852
0.6778	21.34	23.5473	0.529054	0.158331
0.67784	25.69	23.5252	0.529497	0.158816
0.67788	20.86	23.503	0.52994	0.159306
0.67792	25.64	23.4809	0.530382	0.159801
0.67796	20.09	23.4588	0.530824	0.160301
0.678	25.12	23.4367	0.531265	0.160806
0.67804	20.38	23.4147	0.531706	0.161315
0.67808	24.93	23.3927	0.532146	0.16183
0.67812	20.43	23.3707	0.532586	0.162348
0.67816	24.35	23.3488	0.533025	0.162871
0.6782	21.14	23.3268	0.533464	0.163398
0.67824	24.54	23.3049	0.533902	0.163929
0.67828	21.38	23.283	0.534339	0.164463
0.67832	24.5	23.2612	0.534776	0.165
0.67836	22.01	23.2394	0.535213	0.165541
0.6784	25.45	23.2175	0.535649	0.166084
0.67844	21.77	23.1958	0.536085	0.166631
0.67848	25.12	23.174	0.53652	0.16718
0.67852	22.72	23.1523	0.536955	0.167731
0.67856	25.02	23.1305	0.537389	0.168285
0.6786	23.68	23.1088	0.537824	0.16884
0.67864	24.16	23.0871	0.538257	0.169398
0.67868	24.21	23.0655	0.538691	0.169959
0.67872	22.34	23.0438	0.539123	0.170521
0.67876	25.26	23.0222	0.539556	0.171085
0.6788	21.67	23.0006	0.539988	0.171652
0.67884	25.88	22.979	0.540419	0.172221
0.67888	20.43	22.9575	0.54085	0.172792
0.67892	25.26	22.936	0.541281	0.173366
0.67896	19.85	22.9145	0.54171	0.173943
0.679	24.83	22.893	0.542139	0.174522
0.67904	19.95	22.8716	0.542567	0.175104
0.67908	24.83	22.8502	0.542995	0.175688
0.67912	19.71	22.8289	0.543422	0.176276
0.67916	23.78	22.8076	0.543848	0.176867
0.6792	19.56	22.7863	0.544273	0.177462
0.67924	24.45	22.7651	0.544697	0.17806
0.67928	20.33	22.744	0.545121	0.178661
0.67932	24.16	22.7228	0.545544	0.179267
0.67936	20.33	22.7017	0.545966	0.179875
0.6794	23.87	22.6807	0.546387	0.180488
0.67944	21.34	22.6597	0.546807	0.181105
0.67948	24.3	22.6387	0.547226	0.181725
0.67952	21.34	22.6177	0.547645	0.182349
0.67956	25.07	22.5968	0.548063	0.182977
0.6796	21.67	22.576	0.548481	0.183608
0.67964	24.45	22.5551	0.548897	0.184242
0.67968	22.68	22.5344	0.549313	0.18488
0.67972	23.63	22.5136	0.549728	0.185521
0.67976	23.78	22.4929	0.550142	0.186164
0.6798	22.1	22.4722	0.550556	0.186811
0.67984	24.35	22.4516	0.550969	0.187459
0.67988	21.38	22.431	0.551381	0.18811
0.67992	25.02	22.4104	0.551792	0.188763
0.67996	20.24	22.3899	0.552202	0.189418
0.68	24.64	22.3694	0.552612	0.190074
0.68004	20.04	22.349	0.55302	0.190732
0.68008	24.45	22.3286	0.553428	0.19139
0.68012	18.99	22.3083	0.553834	0.19205
0.68016	24.06	22.2881	0.554239	0.192711
0.6802	18.89	22.2678	0.554643	0.193373
0.68024	23.83	22.2477	0.555046	0.194035
0.68028	19.28	22.2276	0.555448	0.194698
0.68032	23.11	22.2076	0.555848	0.195362
0.68036	19.37	22.1876	0.556247	0.196027
0.6804	22.92	22.1677	0.556645	0.196692
0.68044	19.85	22.1479	0.557042	0.197358
0.68048	23.06	22.1281	0.557438	0.198025
0.68052	20.33	22.1084	0.557832	0.198692
0.68056	23.54	22.0887	0.558225	0.199361
0.6806	20.57	22.0691	0.558617	0.200031
0.68064	24.16	22.0496	0.559008	0.200701
0.68068	21.29	22.0301	0.559398	0.201373
0.68072	23.78	22.0106	0.559787	0.202046
0.68076	21.67	21.9913	0.560175	0.20272
0.6808	23.25	21.9719	0.560562	0.203395
0.68084	22.63	21.9526	0.560947	0.204072
0.68088	22.48	21.9334	0.561332	0.204749
0.68092	23.49	21.9142	0.561716	0.205428
0.68096	21	21.8951	0.562098	0.206107
0.681	24.59	21.876	0.56248	0.206788
0.68104	20	21.857	0.56286	0.20747
0.68108	24.64	21.838	0.563239	0.208152
0.68112	19.61	21.8191	0.563618	0.208835
0.68116	24.06	21.8003	0.563995	0.209519
0.6812	18.56	21.7815	0.56437	0.210202
0.68124	23.68	21.7628	0.564745	0.210887
0.68128	18.51	21.7441	0.565118	0.211571
0.68132	23.2	21.7255	0.56549	0.212255
0.68136	18.94	21.707	0.565861	0.212939
0.6814	23.01	21.6885	0.56623	0.213622
0.68144	18.94	21.6701	0.566598	0.214305
0.68148	22.63	21.6518	0.566964	0.214987
0.68152	18.94	21.6335	0.56733	0.215668
0.68156	23.54	21.6153	0.567694	0.216348
0.6816	19.33	21.5972	0.568056	0.217026
0.68164	23.44	21.5791	0.568417	0.217703
0.68168	19.95	21.5611	0.568778	0.218379
0.68172	23.11	21.5432	0.569136	0.219053
0.68176	20.28	21.5253	0.569494	0.219726
0.6818	23.25	21.5075	0.56985	0.220397
0.68184	21.1	21.4897	0.570205	0.221066
0.68188	23.15	21.472	0.570559	0.221734
0.68192	21.53	21.4544	0.570912	0.2224
0.68196	22.53	21.4368	0.571264	0.223064
0.682	22.77	21.4193	0.571614	0.223727
0.68204	21.34	21.4018	0.571964	0.224388
0.68208	23.25	21.3844	0.572312	0.225048
0.68212	20.33	21.3671	0.572659	0.225706
0.68216	23.59	21.3498	0.573005	0.226363
0.6822	19.37	21.3325	0.573349	0.227018
0.68224	24.21	21.3154	0.573692	0.227672
0.68228	17.89	21.2983	0.574034	0.228325
0.68232	23.63	21.2813	0.574374	0.228977
0.68236	17.6	21.2643	0.574713	0.229627
0.6824	23.78	21.2475	0.575051	0.230276
0.68244	18.08	21.2306	0.575387	0.230924
0.68248	22.82	21.2139	0.575722	0.23157
0.68252	17.6	21.1973	0.576055	0.232215
0.68256	22.29	21.1807	0.576386	0.232859
0.6826	18.99	21.1642	0.576716	0.233501
0.68264	22.39	21.1478	0.577045	0.234141
0.68268	18.85	21.1314	0.577372	0.23478
0.68272	22.44	21.1151	0.577697	0.235418
0.68276	19.23	21.0989	0.578021	0.236054
0.6828	22.58	21.0828	0.578344	0.236688
0.68284	19.56	21.0667	0.578665	0.23732
0.68288	23.11	21.0508	0.578985	0.237951
0.68292	19.95	21.0348	0.579303	0.23858
0.68296	23.01	21.019	0.57962	0.239208
0.683	20.76	21.0032	0.579936	0.239834
0.68304	22.34	20.9875	0.58025	0.240458
0.68308	21.72	20.9719	0.580563	0.24108
0.68312	21.72	20.9563	0.580874	0.241701
0.68316	22.1	20.9408	0.581184	0.24232
0.6832	20.09	20.9253	0.581493	0.242937
0.68324	23.25	20.91	0.581801	0.243552
0.68328	19.18	20.8947	0.582107	0.244166
0.68332	23.87	20.8794	0.582411	0.244777
0.68336	17.79	20.8643	0.582714	0.245386
0.6834	23.15	20.8492	0.583016	0.245993
0.68344	17.99	20.8342	0.583316	0.246597
0.68348	23.44	20.8193	0.583614	0.2472
0.68352	17.46	20.8044	0.583911	0.247799
0.68356	22.29	20.7897	0.584206	0.248397
0.6836	17.46	20.775	0.5845	0.248992
0.68364	21.77	20.7604	0.584792	0.249584
0.68368	17.84	20.7459	0.585082	0.250174
0.68372	21.77	20.7315	0.58537	0.250761
0.68376	18.61	20.7171	0.585657	0.251346
0.6838	21.81	20.7029	0.585942	0.251928
0.68384	18.51	20.6887	0.586226	0.252509
0.68388	22.25	20.6746	0.586508	0.253087
0.68392	19.23	20.6606	0.586788	0.253663
0.68396	22.29	20.6467	0.587067	0.254236
0.684	19.66	20.6328	0.587344	0.254808
0.68404	22.39	20.619	0.58762	0.255378
0.68408	20.04	20.6053	0.587894	0.255946
0.68412	22.44	20.5916	0.588167	0.256512
0.68416	20.43	20.5781	0.588438	0.257076
0.6842	22.01	20.5646	0.588708	0.257638
0.68424	21.81	20.5512	0.588977	0.258199
0.68428	20	20.5378	0.589244	0.258758
0.68432	22.72	20.5245	0.58951	0.259314
0.68436	19.52	20.5113	0.589774	0.25987
0.6844	22.63	20.4982	0.590036	0.260423
0.68444	18.66	20.4851	0.590297	0.260974
0.68448	22.68	20.4722	0.590557	0.261524
0.68452	17.65	20.4593	0.590815	0.262072
0.68456	22.34	20.4465	0.591071	0.262618
0.6846	17.36	20.4337	0.591326	0.263163
0.68464	22.87	20.4211	0.591579	0.263706
0.68468	16.93	20.4085	0.59183	0.264247
0.68472	22.05	20.396	0.592079	0.264787
0.68476	17.41	20.3836	0.592327	0.265325
0.6848	21.86	20.3713	0.592573	0.265862
0.68484	17.75	20.3591	0.592817	0.266397
0.68488	22.34	20.347	0.59306	0.266931
0.68492	18.32	20.335	0.593301	0.267464
0.68496	21.67	20.323	0.59354	0.267995
0.685	18.22	20.3111	0.593778	0.268525
0.68504	21.96	20.2993	0.594013	0.269053
0.68508	19.04	20.2876	0.594247	0.26958
0.68512	21.81	20.276	0.59448	0.270105
0.68516	19.42	20.2645	0.594711	0.270628
0.6852	22.2	20.253	0.59494	0.271149
0.68524	19.9	20.2416	0.595167	0.271668
0.68528	21.19	20.2303	0.595393	0.272185
0.68532	21.19	20.2191	0.595617	0.2727
0.68536	20.67	20.208	0.59584	0.273213
0.6854	21.96	20.197	0.596061	0.273723
0.68544	19.47	20.186	0.59628	0.274231
0.68548	22.34	20.1751	0.596498	0.274737
0.68552	18.22	20.1643	0.596714	0.27524
0.68556	22.77	20.1536	0.596928	0.27574
0.6856	17.55	20.143	0.59714	0.276238
0.68564	22.63	20.1325	0.597351	0.276734
0.68568	16.88	20.122	0.59756	0.277226
0.68572	21.72	20.1117	0.597766	0.277717
0.68576	16.55	20.1014	0.597971	0.278204
0.6858	21.72	20.0913	0.598174	0.278689
0.68584	16.5	20.0812	0.598375	0.279172
0.68588	21.34	20.0713	0.598574	0.279652
0.68592	16.98	20.0614	0.598771	0.280129
0.68596	21	20.0517	0.598966	0.280603
0.686	17.22	20.042	0.599159	0.281075
0.68604	20.43	20.0325	0.59935	0.281544
0.68608	17.89	20.023	0.599539	0.28201
0.68612	21.58	20.0137	0.599727	0.282473
0.68616	18.03	20.0044	0.599912	0.282934
0.6862	22.92	19.9952	0.600096	0.283392
0.68624	18.18	19.9861	0.600278	0.283847
0.68628	21.86	19.9771	0.600459	0.284299
0.68632	19.61	19.9681	0.600637	0.284749
0.68636	21.72	19.9593	0.600815	0.285196
0.6864	20.19	19.9505	0.60099	0.285641
0.68644	20.71	19.9418	0.601164	0.286083
0.68648	21.48	19.9332	0.601337	0.286523
0.68652	19.47	19.9246	0.601508	0.28696
0.68656	22.15	19.9161	0.601677	0.287395
0.6866	18.22	19.9077	0.601845	0.287827
0.68664	23.01	19.8994	0.602012	0.288257
0.68668	17.94	19.8912	0.602177	0.288684
0.68672	22.48	19.883	0.60234	0.289109
0.68676	17.17	19.8749	0.602502	0.289532
0.6868	21.91	19.8669	0.602662	0.289952
0.68684	16.45	19.859	0.602821	0.29037
0.68688	21.91	19.8511	0.602978	0.290785
0.68692	16.88	19.8433	0.603133	0.291198
0.68696	21.29	19.8356	0.603287	0.291609
0.687	16.5	19.828	0.603439	0.292016
0.68704	20.76	19.8205	0.60359	0.292422
0.68708	17.12	19.8131	0.603739	0.292825
0.68712	20.47	19.8057	0.603886	0.293225
0.68716	17.94	19.7984	0.604032	0.293623
0.6872	21	19.7912	0.604176	0.294018
0.68724	17.94	19.784	0.604319	0.294411
0.68728	21.19	19.777	0.604461	0.294802
0.68732	18.27	19.77	0.604601	0.29519
0.68736	21.91	19.763	0.60474	0.295576
0.6874	18.7	19.7561	0.604877	0.29596
0.68744	21.1	19.7493	0.605013	0.296341
0.68748	20.28	19.7426	0.605148	0.296721
0.68752	21.53	19.7359	0.605282	0.297099
0.68756	20.86	19.7292	0.605415	0.297474
0.6876	19.85	19.7227	0.605547	0.297848
0.68764	21.53	19.7161	0.605677	0.29822
0.68768	19.42	19.7097	0.605807	0.29859
0.68772	22.63	19.7032	0.605935	0.298958
0.68776	17.6	19.6969	0.606062	0.299325
0.6878	22.25	19.6906	0.606189	0.299689
0.68784	16.93	19.6843	0.606313	0.300052
0.68788	22.25	19.6781	0.606437	0.300413
0.68792	16.5	19.672	0.60656	0.300773
0.68796	22.01	19.6659	0.606681	0.30113
0.688	15.88	19.6599	0.606801	0.301486
0.68804	21.14	19.654	0.60692	0.30184
0.68808	16.21	19.6481	0.607038	0.302192
0.68812	20.81	19.6423	0.607154	0.302543
0.68816	16.98	19.6365	0.607269	0.302891
0.6882	21.14	19.6309	0.607383	0.303238
0.68824	17.32	19.6252	0.607496	0.303583
0.68828	20.71	19.6196	0.607607	0.303927
0.68832	17.51	19.6141	0.607717	0.304268
0.68836	21.1	19.6087	0.607827	0.304608
0.6884	18.13	19.6033	0.607935	0.304946
0.68844	21.77	19.5979	0.608042	0.305282
0.68848	18.32	19.5926	0.608148	0.305616
0.68852	21.96	19.5873	0.608253	0.305948
0.68856	19.28	19.5821	0.608358	0.306278
0.6886	21.38	19.5769	0.608461	0.306606
0.68864	19.33	19.5718	0.608564	0.306931
0.68868	20	19.5667	0.608665	0.307255
0.68872	21.1	19.5617	0.608766	0.307576
0.68876	18.66	19.5567	0.608866	0.307895
0.6888	22.2	19.5517	0.608965	0.308212
0.68884	18.27	19.5468	0.609063	0.308527
0.68888	21.29	19.542	0.609161	0.308839
0.68892	16.79	19.5371	0.609257	0.30915
0.68896	22.15	19.5323	0.609353	0.309458
0.689	16.69	19.5276	0.609448	0.309764
0.68904	22.01	19.5229	0.609542	0.310068
0.68908	16.21	19.5183	0.609635	0.31037
0.68912	21.34	19.5137	0.609727	0.310671
0.68916	16.21	19.5091	0.609818	0.310969
0.6892	21.1	19.5046	0.609908	0.311266
0.68924	16.65	19.5002	0.609997	0.311562
0.68928	20.38	19.4957	0.610085	0.311856
0.68932	17.22	19.4914	0.610173	0.312148
0.68936	21	19.487	0.610259	0.312439
0.6894	17.7	19.4828	0.610345	0.312728
0.68944	21.58	19.4785	0.61043	0.313017
0.68948	17.51	19.4743	0.610514	0.313303
0.68952	21.24	19.4701	0.610598	0.313589
0.68956	18.61	19.466	0.61068	0.313873
0.6896	21.14	19.4619	0.610763	0.314156
0.68964	18.61	19.4578	0.610844	0.314437
0.68968	20.95	19.4537	0.610925	0.314717
0.68972	20.04	19.4497	0.611005	0.314995
0.68976	20.43	19.4457	0.611085	0.315272
0.6898	20.14	19.4418	0.611164	0.315547
0.68984	19.61	19.4378	0.611243	0.315821
0.68988	21.34	19.4339	0.611321	0.316094
0.68992	17.94	19.4301	0.611399	0.316365
0.68996	21.96	19.4262	0.611476	0.316635
0.69	17.27	19.4224	0.611552	0.316903
0.69004	22.29	19.4186	0.611628	0.317169
0.69008	17.08	19.4148	0.611704	0.317435
0.69012	21.72	19.4111	0.611778	0.317699
0.69016	16.41	19.4074	0.611852	0.317961
0.6902	20.81	19.4037	0.611925	0.318222
0.69024	16.45	19.4001	0.611998	0.318482
0.69028	20.81	19.3965	0.61207	0.318741
0.69032	16.41	19.393	0.612141	0.318998
0.69036	20.43	19.3894	0.612211	0.319253
0.6904	16.93	19.3859	0.612281	0.319507
0.69044	20.38	19.3825	0.61235	0.31976
0.69048	17.17	19.3791	0.612418	0.320011
0.69052	21.05	19.3757	0.612486	0.32026
0.69056	17.51	19.3723	0.612553	0.320508
0.6906	21.05	19.369	0.61262	0.320754
0.69064	17.65	19.3657	0.612685	0.320998
0.69068	21.72	19.3625	0.612751	0.32124
0.69072	18.18	19.3592	0.612816	0.321481
0.69076	21.62	19.356	0.61288	0.321719
0.6908	18.89	19.3528	0.612944	0.321956
0.69084	20.95	19.3496	0.613007	0.322191
0.69088	20.24	19.3465	0.613071	0.322424
0.69092	19.9	19.3433	0.613133	0.322655
0.69096	21	19.3402	0.613195	0.322884
0.691	18.42	19.3371	0.613257	0.323111
0.69104	21.72	19.3341	0.613319	0.323337
0.69108	17.75	19.331	0.613379	0.32356
0.69112	22.01	19.328	0.61344	0.323781
0.69116	16.84	19.325	0.6135	0.324001
0.6912	21.58	19.3221	0.613559	0.324218
0.69124	15.83	19.3191	0.613618	0.324433
0.69128	21.24	19.3162	0.613676	0.324646
0.69132	15.83	19.3134	0.613733	0.324857
0.69136	21.29	19.3105	0.61379	0.325065
0.6914	15.97	19.3077	0.613846	0.325271
0.69144	20.62	19.3049	0.613901	0.325474
0.69148	16.36	19.3022	0.613956	0.325675
0.69152	20.62	19.2995	0.61401	0.325873
0.69156	17.22	19.2968	0.614063	0.326068
0.6916	21.14	19.2942	0.614116	0.32626
0.69164	17.17	19.2916	0.614168	0.32645
0.69168	20.62	19.289	0.614219	0.326636
0.69172	17.65	19.2865	0.61427	0.32682
0.69176	21.29	19.284	0.61432	0.327
0.6918	18.37	19.2815	0.61437	0.327177
0.69184	21.34	19.279	0.61442	0.327352
0.69188	18.7	19.2766	0.614468	0.327523
0.69192	20.47	19.2742	0.614517	0.327691
0.69196	19.37	19.2718	0.614565	0.327855
0.692	20.19	19.2694	0.614612	0.328016
0.69204	20.62	19.2671	0.614659	0.328174
0.69208	18.7	19.2647	0.614705	0.328329
0.69212	21.34	19.2624	0.614751	0.32848
0.69216	17.65	19.2602	0.614797	0.328628
0.6922	21.86	19.2579	0.614842	0.328772
0.69224	16.55	19.2557	0.614886	0.328912
0.69228	21.81	19.2535	0.61493	0.329049
0.69232	16.12	19.2513	0.614974	0.329182
0.69236	21.34	19.2492	0.615016	0.329311
0.6924	15.88	19.2471	0.615059	0.329436
0.69244	20.91	19.245	0.6151	0.329557
0.69248	16.45	19.243	0.615141	0.329674
0.69252	19.85	19.2409	0.615181	0.329786
0.69256	16.31	19.239	0.615221	0.329895
0.6926	20.38	19.237	0.61526	0.329999
0.69264	16.93	19.2351	0.615298	0.330099
0.69268	20.33	19.2332	0.615336	0.330194
0.69272	17.27	19.2314	0.615373	0.330285
0.69276	20.81	19.2295	0.615409	0.330371
0.6928	18.08	19.2277	0.615445	0.330453
0.69284	21.34	19.2259	0.615481	0.33053
0.69288	18.18	19.2242	0.615516	0.330603
0.69292	21.38	19.2224	0.615551	0.33067
0.69296	18.56	19.2207	0.615586	0.330733
0.693	20.81	19.219	0.61562	0.330791
0.69304	19.13	19.2173	0.615654	0.330843
0.69308	20.62	19.2156	0.615687	0.330891
0.69312	20.43	19.214	0.615721	0.330933
0.69316	19.33	19.2123	0.615754	0.33097
0.6932	21.34	19.2107	0.615786	0.331002
0.69324	18.7	19.2091	0.615818	0.331028
0.69328	21.62	19.2075	0.61585	0.331049
0.69332	17.7	19.2059	0.615882	0.331064
0.69336	22.2	19.2043	0.615913	0.331074
0.6934	16.41	19.2028	0.615944	0.331078
0.69344	21.53	19.2013	0.615974	0.331077
0.69348	16.17	19.1998	0.616003	0.33107
0.69352	21.38	19.1984	0.616032	0.331057
0.69356	15.54	19.197	0.616061	0.331039
0.6936	20.76	19.1956	0.616088	0.331015
0.69364	16.07	19.1942	0.616115	0.330985
0.69368	20.62	19.1929	0.616141	0.330949
0.69372	16.45	19.1917	0.616167	0.330908
0.69376	20.09	19.1904	0.616192	0.330861
0.6938	16.79	19.1892	0.616216	0.330807
0.69384	20.14	19.1881	0.616239	0.330748
0.69388	17.51	19.1869	0.616261	0.330682
0.69392	20.62	19.1858	0.616283	0.33061
0.69396	18.08	19.1848	0.616304	0.330532
0.694	21.14	19.1838	0.616325	0.330447
0.69404	18.32	19.1828	0.616344	0.330356
0.69408	21	19.1818	0.616363	0.330258
0.69412	18.89	19.1809	0.616382	0.330154
0.69416	21	19.18	0.6164	0.330042
0.6942	19.52	19.1792	0.616417	0.329925
0.69424	20.43	19.1783	0.616433	0.3298
0.69428	20.57	19.1776	0.616449	0.329669
0.69432	18.56	19.1768	0.616464	0.329532
0.69436	21.72	19.1761	0.616478	0.329388
0.6944	16.79	19.1754	0.616492	0.329237
0.69444	21.38	19.1748	0.616504	0.329081
0.69448	16.5	19.1742	0.616516	0.328918
0.69452	22.01	19.1737	0.616527	0.328749
0.69456	16.07	19.1732	0.616537	0.328574
0.6946	21	19.1727	0.616546	0.328393
0.69464	15.74	19.1723	0.616554	0.328206
0.69468	20.76	19.172	0.61656	0.328014
0.69472	15.83	19.1717	0.616566	0.327816
0.69476	20.86	19.1715	0.61657	0.327612
0.6948	16.31	19.1713	0.616574	0.327404
0.69484	20.19	19.1712	0.616576	0.32719
0.69488	16.21	19.1711	0.616577	0.326971
				0.326747
