# Supplementary material for: Shear Thickening Fluids in Cork Agglomerates: An Exploration of Advantages and Drawbacks
Source: Preprints.org preprint supplement (doi:10.20944/preprints202304.0004.v1), 2023-04-03
Supplement: Supplementary file 16 [file EN_y_30.xlsx]

## Sheet: data
Time - Voltage - Voltage	Amplitude - Voltage - Voltage
0	561.4
4e-05	558.6
8e-05	561.7
0.00012	558.8
0.00016	562.1
0.0002	559
0.00024	561.9
0.00028	560.3
0.00032	560.5
0.00036	561.5
0.0004	559.3
0.00044	562.9
0.00048	557.5
0.00052	562.8
0.00056	556.2
0.0006	562.8
0.00064	555.8
0.00068	563
0.00072	554.3
0.00076	562.8
0.0008	554.5
0.00084	561.9
0.00088	555.5
0.00092	560.4
0.00096	556.2
0.001	560.6
0.00104	556.8
0.00108	560.9
0.00112	557.8
0.00116	561.3
0.0012	557.8
0.00124	561.5
0.00128	558.8
0.00132	561.9
0.00136	559
0.0014	561.5
0.00144	560.1
0.00148	560.7
0.00152	561.3
0.00156	559.4
0.0016	562.6
0.00164	557.6
0.00168	563
0.00172	556
0.00176	563.6
0.0018	555.3
0.00184	563.1
0.00188	554.7
0.00192	562.6
0.00196	555
0.002	561.7
0.00204	555.3
0.00208	561.4
0.00212	555.5
0.00216	560.6
0.0022	556.8
0.00224	560.6
0.00228	557.8
0.00232	561.5
0.00236	558
0.0024	561.2
0.00244	558.6
0.00248	561.7
0.00252	559.5
0.00256	561.8
0.0026	560.2
0.00264	560.5
0.00268	561.3
0.00272	559.5
0.00276	561.7
0.0028	558.4
0.00284	562.9
0.00288	556.9
0.00292	563.2
0.00296	554.9
0.003	563.8
0.00304	554.6
0.00308	562.6
0.00312	554.7
0.00316	562
0.0032	555.5
0.00324	561.1
0.00328	555.5
0.00332	560.8
0.00336	556.6
0.0034	561
0.00344	557.1
0.00348	561.1
0.00352	558
0.00356	561.6
0.0036	558.1
0.00364	562.4
0.00368	558.7
0.00372	561.6
0.00376	559.5
0.0038	560.6
0.00384	561.3
0.00388	559.5
0.00392	561.8
0.00396	558.2
0.004	562.9
0.00404	556.9
0.00408	563.1
0.00412	555.4
0.00416	563.1
0.0042	554.8
0.00424	563.2
0.00428	554.3
0.00432	561.9
0.00436	554.8
0.0044	561.4
0.00444	555.9
0.00448	560.8
0.00452	556.7
0.00456	560.4
0.0046	557.4
0.00464	561.1
0.00468	557.9
0.00472	561.1
0.00476	558.4
0.0048	561.6
0.00484	558.9
0.00488	561.9
0.00492	559.5
0.00496	560.8
0.005	560.7
0.00504	559.8
0.00508	561.9
0.00512	558.7
0.00516	562.6
0.0052	556.6
0.00524	563.3
0.00528	555.5
0.00532	563.5
0.00536	554.6
0.0054	561.8
0.00544	554.7
0.00548	562.3
0.00552	554.8
0.00556	561.5
0.0056	556.2
0.00564	560.9
0.00568	556.3
0.00572	561.1
0.00576	557.5
0.0058	561.4
0.00584	557.6
0.00588	561.5
0.00592	558.5
0.00596	561.8
0.006	558.9
0.00604	561.5
0.00608	560
0.00612	560.7
0.00616	560.7
0.0062	560.3
0.00624	562
0.00628	558
0.00632	562.4
0.00636	556.9
0.0064	563.5
0.00644	555.1
0.00648	563.2
0.00652	554.1
0.00656	563.1
0.0066	554.5
0.00664	561.9
0.00668	555.6
0.00672	561.1
0.00676	555.9
0.0068	561.1
0.00684	556.7
0.00688	560.9
0.00692	557.4
0.00696	561.5
0.007	558
0.00704	561.2
0.00708	558.2
0.00712	561.9
0.00716	559.5
0.0072	561.8
0.00724	559.4
0.00728	561
0.00732	560.9
0.00736	559.3
0.0074	562.1
0.00744	558
0.00748	562.9
0.00752	556.8
0.00756	563.2
0.0076	555.7
0.00764	563.2
0.00768	554.7
0.00772	562.4
0.00776	554.8
0.0078	562.1
0.00784	555.2
0.00788	561.4
0.00792	555.8
0.00796	561
0.008	556.8
0.00804	561.1
0.00808	557.7
0.00812	561.1
0.00816	558
0.0082	561.3
0.00824	558.7
0.00828	561.7
0.00832	559.4
0.00836	561.6
0.0084	559.7
0.00844	560.9
0.00848	561.1
0.00852	559.9
0.00856	562.1
0.0086	558.5
0.00864	562.9
0.00868	556.7
0.00872	563.7
0.00876	555.5
0.0088	563.1
0.00884	555.3
0.00888	562.5
0.00892	554.9
0.00896	562.3
0.009	554.8
0.00904	561.7
0.00908	555.4
0.00912	560.9
0.00916	556.5
0.0092	560.7
0.00924	557.3
0.00928	561
0.00932	557.8
0.00936	561.9
0.0094	558.4
0.00944	565.4
0.00948	558.8
0.00952	561.5
0.00956	560.1
0.0096	561
0.00964	560.6
0.00968	560
0.00972	561.8
0.00976	559.1
0.0098	562.5
0.00984	557.2
0.00988	563
0.00992	555.9
0.00996	563.5
0.01	554.8
0.01004	563
0.01008	554.4
0.01012	561.8
0.01016	555
0.0102	561.5
0.01024	556
0.01028	561
0.01032	556.9
0.01036	561.1
0.0104	557.8
0.01044	561.2
0.01048	557.9
0.01052	561.6
0.01056	558.5
0.0106	561.7
0.01064	559.4
0.01068	561.5
0.01072	559.7
0.01076	560.8
0.0108	561.2
0.01084	559.9
0.01088	561.9
0.01092	558.3
0.01096	563
0.011	556.9
0.01104	563.6
0.01108	555.8
0.01112	563.3
0.01116	554.9
0.0112	562.7
0.01124	554.5
0.01128	561.8
0.01132	555
0.01136	561.5
0.0114	555.8
0.01144	561.4
0.01148	556.6
0.01152	560.9
0.01156	557.3
0.0116	561.3
0.01164	558.4
0.01168	561.2
0.01172	558.5
0.01176	561.9
0.0118	559.3
0.01184	561.7
0.01188	559.7
0.01192	561.2
0.01196	560.9
0.012	560
0.01204	562.4
0.01208	557.9
0.01212	563.2
0.01216	556.6
0.0122	563.5
0.01224	556
0.01228	563
0.01232	555.1
0.01236	562.4
0.0124	554.8
0.01244	562.2
0.01248	555.3
0.01252	561.8
0.01256	556.2
0.0126	561.1
0.01264	556.5
0.01268	560.9
0.01272	558
0.01276	561.4
0.0128	558
0.01284	561.4
0.01288	557.8
0.01292	562.4
0.01296	559.9
0.013	561.7
0.01304	560.8
0.01308	560.6
0.01312	561.2
0.01316	560.1
0.0132	562
0.01324	558.4
0.01328	562.7
0.01332	557.3
0.01336	563.3
0.0134	555.7
0.01344	563.3
0.01348	555
0.01352	563.2
0.01356	554.9
0.0136	562.4
0.01364	555.3
0.01368	561.5
0.01372	556.2
0.01376	561.2
0.0138	556.7
0.01384	561.4
0.01388	557.8
0.01392	561.2
0.01396	558
0.014	561.7
0.01404	558.7
0.01408	562.1
0.01412	559.2
0.01416	561.8
0.0142	560.2
0.01424	561
0.01428	561.5
0.01432	560.1
0.01436	562.3
0.0144	558.3
0.01444	563.1
0.01448	557.1
0.01452	563.5
0.01456	555.6
0.0146	563.3
0.01464	555
0.01468	563
0.01472	554.8
0.01476	562.3
0.0148	554.8
0.01484	561.5
0.01488	555.9
0.01492	561.6
0.01496	556.7
0.015	561
0.01504	557.8
0.01508	561.2
0.01512	558.5
0.01516	562.2
0.0152	558.9
0.01524	561.9
0.01528	559.3
0.01532	561.7
0.01536	560.1
0.0154	561.4
0.01544	561.1
0.01548	560.4
0.01552	562.2
0.01556	558.5
0.0156	563.1
0.01564	556.4
0.01568	563.9
0.01572	556
0.01576	563.6
0.0158	554.8
0.01584	562.8
0.01588	555.2
0.01592	562.3
0.01596	555.4
0.016	561.7
0.01604	554.8
0.01608	561
0.01612	556.9
0.01616	561.2
0.0162	557.7
0.01624	560.9
0.01628	558
0.01632	561.7
0.01636	558.8
0.0164	561.8
0.01644	559.4
0.01648	562
0.01652	560.2
0.01656	560.8
0.0166	561.5
0.01664	559.7
0.01668	562.1
0.01672	558
0.01676	563
0.0168	557.5
0.01684	563
0.01688	555.2
0.01692	563.3
0.01696	554.9
0.017	563.3
0.01704	554.9
0.01708	561.8
0.01712	555.4
0.01716	561.4
0.0172	556
0.01724	560.9
0.01728	556.8
0.01732	561.1
0.01736	557.8
0.0174	561.3
0.01744	558.4
0.01748	561.3
0.01752	558.9
0.01756	562
0.0176	559.1
0.01764	561.9
0.01768	560.1
0.01772	561.1
0.01776	561
0.0178	559.5
0.01784	562.7
0.01788	558.5
0.01792	562.8
0.01796	556.3
0.018	563.7
0.01804	555.2
0.01808	563.4
0.01812	554.6
0.01816	562.8
0.0182	554.7
0.01824	562.1
0.01828	555.2
0.01832	561.8
0.01836	555.8
0.0184	561.2
0.01844	556.7
0.01848	561
0.01852	557.4
0.01856	561.5
0.0186	557.7
0.01864	562
0.01868	558.6
0.01872	561.5
0.01876	559.5
0.0188	561.3
0.01884	559.7
0.01888	561.4
0.01892	560.7
0.01896	559.9
0.019	561.4
0.01904	558
0.01908	563.2
0.01912	557.1
0.01916	563.1
0.0192	555.3
0.01924	563.3
0.01928	555.3
0.01932	562.4
0.01936	555.2
0.0194	561.9
0.01944	556
0.01948	561.6
0.01952	556.1
0.01956	561.5
0.0196	556.4
0.01964	560.8
0.01968	557.5
0.01972	561.6
0.01976	557.7
0.0198	561.4
0.01984	558.3
0.01988	561.7
0.01992	559
0.01996	561.9
0.02	560
0.02004	560.5
0.02008	561
0.02012	559.7
0.02016	562.2
0.0202	558.6
0.02024	562.8
0.02028	556.7
0.02032	563.3
0.02036	555.6
0.0204	563.3
0.02044	554.7
0.02048	562.8
0.02052	554.3
0.02056	562.1
0.0206	554.6
0.02064	561.2
0.02068	555.6
0.02072	561
0.02076	556.6
0.0208	561.3
0.02084	557.5
0.02088	561.3
0.02092	558
0.02096	561.3
0.021	558.4
0.02104	561.7
0.02108	559
0.02112	562
0.02116	559.6
0.0212	561.4
0.02124	560.8
0.02128	559.7
0.02132	562.1
0.02136	558
0.0214	563
0.02144	556.6
0.02148	563.2
0.02152	555.6
0.02156	563
0.0216	554.7
0.02164	562.8
0.02168	554.4
0.02172	562.1
0.02176	555.1
0.0218	561.7
0.02184	555.6
0.02188	561.2
0.02192	556.5
0.02196	561.1
0.022	557.6
0.02204	561.3
0.02208	558.4
0.02212	561.6
0.02216	558.3
0.0222	561.4
0.02224	559.4
0.02228	561.5
0.02232	560
0.02236	561.2
0.0224	560.9
0.02244	559.8
0.02248	562.1
0.02252	558.7
0.02256	563
0.0226	556.6
0.02264	563.3
0.02268	555
0.02272	563.7
0.02276	554.6
0.0228	561.6
0.02284	554.9
0.02288	561.5
0.02292	555.4
0.02296	561.3
0.023	555.2
0.02304	561
0.02308	557.1
0.02312	560.8
0.02316	557.3
0.0232	561.3
0.02324	557.9
0.02328	561.5
0.02332	558.5
0.02336	562.2
0.0234	559.1
0.02344	561.5
0.02348	560
0.02352	560.4
0.02356	561.4
0.0236	559
0.02364	562.2
0.02368	557.8
0.02372	563.1
0.02376	556.8
0.0238	563
0.02384	555.1
0.02388	562.8
0.02392	554.9
0.02396	562.6
0.024	554.6
0.02404	561.5
0.02408	554.9
0.02412	561
0.02416	556
0.0242	561.2
0.02424	556.7
0.02428	560.5
0.02432	557.2
0.02436	561.1
0.0244	558.1
0.02444	561.7
0.02448	558.6
0.02452	561.6
0.02456	559.1
0.0246	561.7
0.02464	560.3
0.02468	560.6
0.02472	561
0.02476	559.3
0.0248	562.4
0.02484	557.7
0.02488	563.1
0.02492	556.2
0.02496	563.2
0.025	555.4
0.02504	563.1
0.02508	555
0.02512	562.4
0.02516	554.1
0.0252	561.8
0.02524	555.2
0.02528	561.5
0.02532	556
0.02536	560.9
0.0254	556.7
0.02544	561.2
0.02548	557.6
0.02552	561.3
0.02556	558
0.0256	561.4
0.02564	558.8
0.02568	561.7
0.02572	558.9
0.02576	561.3
0.0258	560.5
0.02584	560.5
0.02588	560.7
0.02592	559.5
0.02596	562.3
0.026	558.2
0.02604	563
0.02608	556.6
0.02612	563.6
0.02616	555.1
0.0262	563.4
0.02624	555.1
0.02628	562.6
0.02632	554.9
0.02636	561.9
0.0264	555.2
0.02644	561.4
0.02648	555.6
0.02652	560.9
0.02656	557.4
0.0266	560.4
0.02664	557.2
0.02668	561.2
0.02672	558.3
0.02676	562.2
0.0268	558.3
0.02684	561.6
0.02688	559.6
0.02692	561.5
0.02696	560.3
0.027	560
0.02704	561.6
0.02708	558.8
0.02712	562
0.02716	557.7
0.0272	563.4
0.02724	556.2
0.02728	562.5
0.02732	555.6
0.02736	563.6
0.0274	554.6
0.02744	562.5
0.02748	554.6
0.02752	561.9
0.02756	554.7
0.0276	561.6
0.02764	555.9
0.02768	561
0.02772	556.7
0.02776	561.1
0.0278	557.9
0.02784	560.9
0.02788	558.5
0.02792	561.5
0.02796	558.7
0.028	561.9
0.02804	559.2
0.02808	561.8
0.02812	559.9
0.02816	561
0.0282	561.5
0.02824	559.7
0.02828	562.4
0.02832	557.6
0.02836	563
0.0284	556.4
0.02844	563.3
0.02848	555.3
0.02852	562.9
0.02856	555
0.0286	562.6
0.02864	554.7
0.02868	561.9
0.02872	555.8
0.02876	561.2
0.0288	556
0.02884	560.8
0.02888	556.9
0.02892	561.8
0.02896	557.6
0.029	561.4
0.02904	558.6
0.02908	561.9
0.02912	558
0.02916	561.6
0.0292	559.5
0.02924	561.5
0.02928	560.7
0.02932	560
0.02936	561
0.0294	559.2
0.02944	562.2
0.02948	558.7
0.02952	563.5
0.02956	556
0.0296	563.6
0.02964	555.1
0.02968	563.6
0.02972	554.8
0.02976	562.4
0.0298	554.4
0.02984	561.9
0.02988	555.3
0.02992	561.5
0.02996	556.7
0.03	561.6
0.03004	556.8
0.03008	561.7
0.03012	557.5
0.03016	561.4
0.0302	558
0.03024	561.7
0.03028	558.7
0.03032	561.9
0.03036	559.4
0.0304	561.5
0.03044	560.1
0.03048	561.1
0.03052	561.7
0.03056	559.7
0.0306	562.4
0.03064	557.5
0.03068	563.6
0.03072	556.4
0.03076	563.4
0.0308	555.1
0.03084	562.8
0.03088	554.9
0.03092	562.8
0.03096	554.3
0.031	561.9
0.03104	555.1
0.03108	561.3
0.03112	556.2
0.03116	561.2
0.0312	557.3
0.03124	560.9
0.03128	557.7
0.03132	561.1
0.03136	558.3
0.0314	561.6
0.03144	558.7
0.03148	561.7
0.03152	559.2
0.03156	561.4
0.0316	560.4
0.03164	560.4
0.03168	561.7
0.03172	559.1
0.03176	562.5
0.0318	558.1
0.03184	563.3
0.03188	556.4
0.03192	563.6
0.03196	555.1
0.032	563.4
0.03204	555.4
0.03208	562.4
0.03212	555
0.03216	562.3
0.0322	555.2
0.03224	561.9
0.03228	556.5
0.03232	560.5
0.03236	557.3
0.0324	561
0.03244	557
0.03248	561.6
0.03252	558
0.03256	561.2
0.0326	558.6
0.03264	561.8
0.03268	559.8
0.03272	561.6
0.03276	560.5
0.0328	560.2
0.03284	561
0.03288	559.9
0.03292	562.3
0.03296	558.2
0.033	563
0.03304	556.1
0.03308	564.1
0.03312	555.8
0.03316	563.2
0.0332	554.8
0.03324	563.2
0.03328	555.2
0.03332	562.1
0.03336	555.5
0.0334	561
0.03344	556.5
0.03348	561.2
0.03352	556.9
0.03356	561.4
0.0336	558
0.03364	561.4
0.03368	558.2
0.03372	561.9
0.03376	558.8
0.0338	561.8
0.03384	559.3
0.03388	561.6
0.03392	560.6
0.03396	560.5
0.034	561.8
0.03404	558.7
0.03408	563
0.03412	557.8
0.03416	563.2
0.0342	556.2
0.03424	563.3
0.03428	555.3
0.03432	563.3
0.03436	554.7
0.0344	562.5
0.03444	554.6
0.03448	561.6
0.03452	555.9
0.03456	561.4
0.0346	556.4
0.03464	560.8
0.03468	557.3
0.03472	561.1
0.03476	558
0.0348	561.6
0.03484	558.6
0.03488	561.6
0.03492	559
0.03496	562
0.035	560.1
0.03504	561.3
0.03508	560.4
0.03512	560.3
0.03516	562.1
0.0352	558.6
0.03524	563.2
0.03528	557.4
0.03532	563.4
0.03536	555.4
0.0354	563.7
0.03544	555.2
0.03548	562.9
0.03552	554.6
0.03556	562.2
0.0356	555.3
0.03564	561.7
0.03568	555.5
0.03572	561.3
0.03576	556.5
0.0358	560.9
0.03584	557.9
0.03588	561.4
0.03592	558.2
0.03596	561.6
0.036	558.5
0.03604	561.9
0.03608	559.3
0.03612	561.5
0.03616	559.9
0.0362	561.6
0.03624	561.5
0.03628	559.8
0.03632	562.1
0.03636	559.2
0.0364	562.8
0.03644	557.5
0.03648	563.3
0.03652	555.9
0.03656	563.4
0.0366	554.6
0.03664	563.2
0.03668	555.3
0.03672	562.5
0.03676	554.5
0.0368	560.9
0.03684	555.9
0.03688	561.3
0.03692	556.9
0.03696	561
0.037	557.5
0.03704	561.1
0.03708	558.2
0.03712	561.8
0.03716	558.4
0.0372	562.4
0.03724	558.7
0.03728	562.3
0.03732	559.8
0.03736	561.1
0.0374	561.2
0.03744	560.1
0.03748	562.1
0.03752	558.6
0.03756	563
0.0376	557
0.03764	563.2
0.03768	555.6
0.03772	563.5
0.03776	554.7
0.0378	562.8
0.03784	554.9
0.03788	561.9
0.03792	555.4
0.03796	561.4
0.038	555.5
0.03804	561
0.03808	556.4
0.03812	561.2
0.03816	557.6
0.0382	561.3
0.03824	558
0.03828	561.4
0.03832	558.6
0.03836	562.3
0.0384	559.2
0.03844	561.6
0.03848	559.9
0.03852	561
0.03856	561
0.0386	559.9
0.03864	562.4
0.03868	558.3
0.03872	563
0.03876	556.7
0.0388	563.8
0.03884	555.7
0.03888	563.8
0.03892	554.7
0.03896	563.2
0.039	555.1
0.03904	562.5
0.03908	555.4
0.03912	561.5
0.03916	555.6
0.0392	560.9
0.03924	556.7
0.03928	561.5
0.03932	557.2
0.03936	560.9
0.0394	558
0.03944	561.8
0.03948	558.6
0.03952	561.7
0.03956	558.8
0.0396	561.9
0.03964	559.8
0.03968	560.6
0.03972	561
0.03976	559.7
0.0398	562.3
0.03984	558.4
0.03988	562.8
0.03992	556.7
0.03996	563.2
0.04	555.5
0.04004	563.3
0.04008	554.6
0.04012	562.4
0.04016	554.6
0.0402	561.9
0.04024	555
0.04028	561.1
0.04032	555.7
0.04036	561.3
0.0404	556.8
0.04044	560.9
0.04048	557.7
0.04052	561.3
0.04056	558
0.0406	561.5
0.04064	558.6
0.04068	562.2
0.04072	559
0.04076	561.4
0.0408	559.4
0.04084	561
0.04088	561.5
0.04092	558.9
0.04096	562.6
0.041	557.4
0.04104	562.9
0.04108	556.6
0.04112	563.3
0.04116	555.2
0.0412	563.1
0.04124	554.8
0.04128	562.2
0.04132	554.6
0.04136	562.2
0.0414	555
0.04144	561.2
0.04148	556.1
0.04152	561.2
0.04156	557.5
0.0416	561.4
0.04164	557.9
0.04168	561.5
0.04172	558.1
0.04176	561.8
0.0418	558.8
0.04184	561.9
0.04188	559.1
0.04192	561.2
0.04196	560.2
0.042	560.3
0.04204	561.1
0.04208	559.3
0.04212	561.9
0.04216	557.9
0.0422	562.7
0.04224	556
0.04228	563.6
0.04232	554.6
0.04236	563.3
0.0424	553.9
0.04244	562.3
0.04248	554.6
0.04252	561.5
0.04256	555.3
0.0426	561
0.04264	556.8
0.04268	560.9
0.04272	557
0.04276	561.4
0.0428	557.6
0.04284	561
0.04288	558.2
0.04292	561.7
0.04296	558.3
0.043	562
0.04304	559.1
0.04308	561.5
0.04312	560.4
0.04316	560.2
0.0432	561.5
0.04324	559.8
0.04328	562.6
0.04332	557.5
0.04336	562.9
0.0434	556
0.04344	562.8
0.04348	555
0.04352	562.9
0.04356	554.1
0.0436	562.6
0.04364	554.1
0.04368	561.8
0.04372	555.3
0.04376	561.1
0.0438	556.1
0.04384	560.9
0.04388	557
0.04392	560.7
0.04396	558
0.044	561.4
0.04404	558.2
0.04408	561.6
0.04412	558.8
0.04416	561.7
0.0442	559.7
0.04424	561.1
0.04428	560.3
0.04432	560.4
0.04436	561.5
0.0444	558.7
0.04444	562.7
0.04448	557.2
0.04452	563.4
0.04456	555.3
0.0446	563.3
0.04464	554.8
0.04468	563
0.04472	554.7
0.04476	561.9
0.0448	554.7
0.04484	561.3
0.04488	555.5
0.04492	561
0.04496	556.4
0.045	561.4
0.04504	557.2
0.04508	560.8
0.04512	557.7
0.04516	561.4
0.0452	558.5
0.04524	561.5
0.04528	559.1
0.04532	561.7
0.04536	560.2
0.0454	561.3
0.04544	560.7
0.04548	559.7
0.04552	561.7
0.04556	558.6
0.0456	562.8
0.04564	556.8
0.04568	563.4
0.04572	555.2
0.04576	563.2
0.0458	554.6
0.04584	562.9
0.04588	554.3
0.04592	561.7
0.04596	555.1
0.046	561.8
0.04604	555.7
0.04608	560.5
0.04612	556.4
0.04616	561.2
0.0462	557.5
0.04624	561
0.04628	558
0.04632	561.4
0.04636	558.1
0.0464	561.7
0.04644	559.1
0.04648	561.7
0.04652	559.5
0.04656	560.6
0.0466	561.8
0.04664	559.5
0.04668	562.4
0.04672	557.9
0.04676	563
0.0468	556.4
0.04684	563.3
0.04688	556.3
0.04692	563
0.04696	554.9
0.047	562.8
0.04704	554.6
0.04708	562.8
0.04712	554.9
0.04716	561.5
0.0472	555.7
0.04724	561
0.04728	556.9
0.04732	560.8
0.04736	557.3
0.0474	561.5
0.04744	558
0.04748	561.5
0.04752	558.4
0.04756	561.9
0.0476	559.2
0.04764	561.8
0.04768	560
0.04772	560.7
0.04776	561.2
0.0478	559.8
0.04784	561.6
0.04788	558.2
0.04792	562.9
0.04796	556.7
0.048	563.5
0.04804	555.5
0.04808	563.6
0.04812	555.2
0.04816	562.5
0.0482	555
0.04824	561.9
0.04828	555.4
0.04832	561.5
0.04836	555.8
0.0484	561
0.04844	556.8
0.04848	560.6
0.04852	557.4
0.04856	561
0.0486	558
0.04864	561.2
0.04868	558.3
0.04872	561.5
0.04876	559.4
0.0488	561.5
0.04884	560.2
0.04888	560.3
0.04892	561.1
0.04896	559.3
0.049	561.6
0.04904	558.3
0.04908	562.5
0.04912	556.5
0.04916	563.3
0.0492	555.3
0.04924	563.8
0.04928	554.5
0.04932	562.9
0.04936	554.6
0.0494	562
0.04944	555.3
0.04948	561.7
0.04952	555.9
0.04956	561.2
0.0496	556.9
0.04964	562.1
0.04968	557.8
0.04972	561
0.04976	558.4
0.0498	561.7
0.04984	558.9
0.04988	561.6
0.04992	559.1
0.04996	561.8
0.05	560.3
0.05004	561.1
0.05008	561.2
0.05012	559.3
0.05016	562.5
0.0502	557.8
0.05024	563.5
0.05028	556.5
0.05032	563.4
0.05036	555.3
0.0504	563.2
0.05044	555.1
0.05048	562.8
0.05052	554.6
0.05056	562
0.0506	555.1
0.05064	561.2
0.05068	556.2
0.05072	561.3
0.05076	557
0.0508	560.6
0.05084	557.9
0.05088	561.8
0.05092	558.2
0.05096	561.5
0.051	558.8
0.05104	561.8
0.05108	559.8
0.05112	561.5
0.05116	560.4
0.0512	560.7
0.05124	561.5
0.05128	559.5
0.05132	562.8
0.05136	557.6
0.0514	563.3
0.05144	556.2
0.05148	563.6
0.05152	554.9
0.05156	563.3
0.0516	554.9
0.05164	562.5
0.05168	554.9
0.05172	561.9
0.05176	555.6
0.0518	561.1
0.05184	556.4
0.05188	561.1
0.05192	556.9
0.05196	561.3
0.052	557.8
0.05204	561.6
0.05208	558.2
0.05212	562.5
0.05216	559.1
0.0522	562.2
0.05224	559.4
0.05228	561.6
0.05232	560.9
0.05236	560.5
0.0524	562
0.05244	559.3
0.05248	562.4
0.05252	558.4
0.05256	563.4
0.0526	557.1
0.05264	563.2
0.05268	554.8
0.05272	563
0.05276	554.8
0.0528	563
0.05284	554.6
0.05288	562
0.05292	555.5
0.05296	560.9
0.053	556.2
0.05304	561.3
0.05308	556
0.05312	561.1
0.05316	557.6
0.0532	561.5
0.05324	558.3
0.05328	561.7
0.05332	558.8
0.05336	561.8
0.0534	559.7
0.05344	562
0.05348	560.2
0.05352	560.9
0.05356	561.2
0.0536	559.8
0.05364	563
0.05368	558.1
0.05372	563.2
0.05376	557.1
0.0538	563.6
0.05384	555.8
0.05388	563.3
0.05392	555.2
0.05396	563.1
0.054	554.9
0.05404	562.3
0.05408	555.4
0.05412	561.4
0.05416	555.8
0.0542	561.3
0.05424	556.8
0.05428	561.3
0.05432	557.8
0.05436	561.4
0.0544	558.3
0.05444	561.8
0.05448	558.5
0.05452	562
0.05456	559.4
0.0546	561.8
0.05464	560.2
0.05468	560.9
0.05472	561.4
0.05476	559.7
0.0548	562.4
0.05484	558.2
0.05488	563.3
0.05492	556.4
0.05496	563.9
0.055	555.4
0.05504	563.3
0.05508	555
0.05512	563
0.05516	554.7
0.0552	562.2
0.05524	555.2
0.05528	561.3
0.05532	556.2
0.05536	560.9
0.0554	557.1
0.05544	560.8
0.05548	557.6
0.05552	561.5
0.05556	558.4
0.0556	561.8
0.05564	558.3
0.05568	562.3
0.05572	559.6
0.05576	561.5
0.0558	560.5
0.05584	561
0.05588	561.5
0.05592	560.1
0.05596	562.4
0.056	558.3
0.05604	563.4
0.05608	556.6
0.05612	563.6
0.05616	555.2
0.0562	563.4
0.05624	555
0.05628	562.8
0.05632	554.8
0.05636	561.9
0.0564	555.6
0.05644	561.6
0.05648	556.5
0.05652	561.2
0.05656	557.2
0.0566	560.9
0.05664	557.8
0.05668	561.4
0.05672	558.4
0.05676	562
0.0568	558.7
0.05684	562.1
0.05688	559.4
0.05692	561.5
0.05696	560.2
0.057	561.1
0.05704	561.3
0.05708	559.7
0.05712	562.3
0.05716	557.6
0.0572	563
0.05724	556.2
0.05728	563.6
0.05732	555.4
0.05736	563
0.0574	554.9
0.05744	562.5
0.05748	555.1
0.05752	561.9
0.05756	555.6
0.0576	561.5
0.05764	555.8
0.05768	561.2
0.05772	557.2
0.05776	561
0.0578	557.6
0.05784	561.2
0.05788	558.3
0.05792	562
0.05796	558.7
0.058	562
0.05804	559.4
0.05808	561.5
0.05812	560.5
0.05816	560.7
0.0582	561
0.05824	559.6
0.05828	562.1
0.05832	558
0.05836	563.1
0.0584	556.9
0.05844	563.4
0.05848	555.5
0.05852	563.3
0.05856	554.8
0.0586	562.6
0.05864	555.1
0.05868	562
0.05872	555.4
0.05876	561.2
0.0588	555.8
0.05884	561.3
0.05888	556.4
0.05892	561
0.05896	557.9
0.059	561.5
0.05904	558.3
0.05908	561.6
0.05912	558.7
0.05916	562.8
0.0592	559.3
0.05924	562.1
0.05928	560.2
0.05932	560.9
0.05936	561.1
0.0594	559.2
0.05944	562.4
0.05948	557.5
0.05952	562.8
0.05956	557.3
0.0596	563.1
0.05964	555.8
0.05968	562.6
0.05972	554.9
0.05976	563
0.0598	554.4
0.05984	561.7
0.05988	555
0.05992	560.7
0.05996	555.7
0.06	561.3
0.06004	556.4
0.06008	560.8
0.06012	557.2
0.06016	561
0.0602	558.2
0.06024	562.2
0.06028	558.2
0.06032	561.7
0.06036	559
0.0604	562
0.06044	559.5
0.06048	561
0.06052	561.4
0.06056	559.5
0.0606	562.6
0.06064	557.7
0.06068	563.2
0.06072	556.4
0.06076	563.3
0.0608	555.2
0.06084	563.2
0.06088	555.1
0.06092	562.5
0.06096	554.8
0.061	561.9
0.06104	555.1
0.06108	561.4
0.06112	556.2
0.06116	560.9
0.0612	556.6
0.06124	560.8
0.06128	557.9
0.06132	561.3
0.06136	558.1
0.0614	561.6
0.06144	559
0.06148	561.6
0.06152	559.4
0.06156	561.2
0.0616	560.3
0.06164	560.8
0.06168	561.2
0.06172	559.4
0.06176	562.1
0.0618	558
0.06184	563.4
0.06188	556.2
0.06192	563.3
0.06196	554.9
0.062	563
0.06204	554.6
0.06208	562.8
0.06212	554.7
0.06216	561.6
0.0622	555.4
0.06224	561.2
0.06228	556.2
0.06232	560.9
0.06236	557.1
0.0624	561.1
0.06244	557.6
0.06248	561.4
0.06252	558.1
0.06256	561.5
0.0626	558.4
0.06264	561.3
0.06268	559.2
0.06272	561.7
0.06276	559.7
0.0628	561.1
0.06284	561.1
0.06288	559
0.06292	562.6
0.06296	557.4
0.063	563.6
0.06304	556.7
0.06308	563.1
0.06312	555.3
0.06316	563.9
0.0632	554.4
0.06324	563
0.06328	555
0.06332	561.7
0.06336	554.9
0.0634	561.5
0.06344	556.2
0.06348	561
0.06352	556.6
0.06356	560.5
0.0636	557.7
0.06364	561
0.06368	558
0.06372	561.3
0.06376	558.5
0.0638	561.7
0.06384	558.9
0.06388	561.7
0.06392	559.9
0.06396	560.7
0.064	561.5
0.06404	559.4
0.06408	562.4
0.06412	557.8
0.06416	563.1
0.0642	556.2
0.06424	563.3
0.06428	555.6
0.06432	563.3
0.06436	554.6
0.0644	562.4
0.06444	554.8
0.06448	561.8
0.06452	555.1
0.06456	561.3
0.0646	555.9
0.06464	560.9
0.06468	556.7
0.06472	561.1
0.06476	558
0.0648	561.2
0.06484	558.1
0.06488	561.7
0.06492	558.5
0.06496	561.6
0.065	559.5
0.06504	561.5
0.06508	560.2
0.06512	560.5
0.06516	561.3
0.0652	559.4
0.06524	562.3
0.06528	557.7
0.06532	563.2
0.06536	556.2
0.0654	563.3
0.06544	554.8
0.06548	562.9
0.06552	554.5
0.06556	563
0.0656	554.7
0.06564	561.4
0.06568	555.3
0.06572	561.2
0.06576	556.5
0.0658	560.7
0.06584	556.7
0.06588	560.9
0.06592	557.3
0.06596	561.5
0.066	558
0.06604	561.6
0.06608	559
0.06612	562
0.06616	559.1
0.0662	561.6
0.06624	560.3
0.06628	560.3
0.06632	561.5
0.06636	558.9
0.0664	562.6
0.06644	557.8
0.06648	562.8
0.06652	556.4
0.06656	563.3
0.0666	554.8
0.06664	563.3
0.06668	554
0.06672	562.3
0.06676	554.5
0.0668	561.7
0.06684	554.9
0.06688	561.2
0.06692	555.9
0.06696	561.2
0.067	556.9
0.06704	560.8
0.06708	557.8
0.06712	561.4
0.06716	558.2
0.0672	561.6
0.06724	558.7
0.06728	561.8
0.06732	559.4
0.06736	561.4
0.0674	560.6
0.06744	560.9
0.06748	561.5
0.06752	558.7
0.06756	562.8
0.0676	557.1
0.06764	563.6
0.06768	555.7
0.06772	563.4
0.06776	554.7
0.0678	562.9
0.06784	554.7
0.06788	562
0.06792	554.5
0.06796	561.4
0.068	555.7
0.06804	561.1
0.06808	556.3
0.06812	561.1
0.06816	557.1
0.0682	561
0.06824	558
0.06828	561.4
0.06832	558.4
0.06836	561.7
0.0684	558.9
0.06844	561.9
0.06848	559.7
0.06852	561
0.06856	560.8
0.0686	560
0.06864	562
0.06868	558.3
0.06872	562.7
0.06876	557.1
0.0688	563.3
0.06884	556.2
0.06888	563.6
0.06892	554.9
0.06896	562.9
0.069	554.4
0.06904	562.9
0.06908	555.3
0.06912	561.5
0.06916	555.8
0.0692	561.3
0.06924	556.6
0.06928	561.1
0.06932	557.2
0.06936	561.5
0.0694	558.2
0.06944	560.9
0.06948	558.1
0.06952	562.7
0.06956	559.5
0.0696	561.4
0.06964	559.3
0.06968	561.5
0.06972	561.1
0.06976	559.5
0.0698	562.6
0.06984	558.1
0.06988	563.3
0.06992	556.7
0.06996	563.4
0.07	555.9
0.07004	563
0.07008	554.3
0.07012	562.6
0.07016	554.5
0.0702	562.3
0.07024	555
0.07028	561.6
0.07032	556
0.07036	561.1
0.0704	557
0.07044	561.1
0.07048	557.8
0.07052	561.1
0.07056	557.9
0.0706	562
0.07064	558.6
0.07068	561.7
0.07072	559.1
0.07076	561.9
0.0708	560.2
0.07084	560.6
0.07088	561
0.07092	559.9
0.07096	562.2
0.071	557.9
0.07104	563.1
0.07108	556.9
0.07112	563.7
0.07116	555.2
0.0712	563.3
0.07124	554.7
0.07128	562.8
0.07132	554.9
0.07136	562.1
0.0714	555.6
0.07144	561.3
0.07148	555.9
0.07152	561.3
0.07156	556.8
0.0716	561
0.07164	557.4
0.07168	561.2
0.07172	558.1
0.07176	561.9
0.0718	558.7
0.07184	561.9
0.07188	559.6
0.07192	562.1
0.07196	560.4
0.072	560.3
0.07204	561.2
0.07208	559.7
0.07212	562.6
0.07216	557.8
0.0722	562.6
0.07224	556.2
0.07228	563.4
0.07232	556.1
0.07236	563.3
0.0724	553.7
0.07244	562.8
0.07248	555.5
0.07252	561.6
0.07256	555.1
0.0726	561
0.07264	556.1
0.07268	560.7
0.07272	557.1
0.07276	561.4
0.0728	558
0.07284	561.3
0.07288	557.9
0.07292	562.3
0.07296	559.8
0.073	561.5
0.07304	559.5
0.07308	561.6
0.07312	559.9
0.07316	560.8
0.0732	562.1
0.07324	559.1
0.07328	562.8
0.07332	557.4
0.07336	563.6
0.0734	556.5
0.07344	563.5
0.07348	555.3
0.07352	563.2
0.07356	555.1
0.0736	562.7
0.07364	554.6
0.07368	561.6
0.07372	555.3
0.07376	561.6
0.0738	556.5
0.07384	561
0.07388	557.6
0.07392	560.9
0.07396	558.3
0.074	561.5
0.07404	558.4
0.07408	561.7
0.07412	558.8
0.07416	562.1
0.0742	560.1
0.07424	561.5
0.07428	560.4
0.07432	560.2
0.07436	561.8
0.0744	559.3
0.07444	562.8
0.07448	557.4
0.07452	563.4
0.07456	556
0.0746	563.8
0.07464	555.1
0.07468	563.3
0.07472	554.7
0.07476	562.4
0.0748	555.3
0.07484	562
0.07488	555.6
0.07492	561.1
0.07496	556.1
0.075	561.1
0.07504	557.6
0.07508	561.4
0.07512	557.9
0.07516	561.5
0.0752	558.5
0.07524	562.3
0.07528	559.2
0.07532	561.7
0.07536	559.8
0.0754	561.5
0.07544	560.9
0.07548	560.2
0.07552	562.2
0.07556	558.7
0.0756	563.1
0.07564	556.9
0.07568	563.7
0.07572	556.2
0.07576	563.4
0.0758	554.7
0.07584	563.1
0.07588	554.4
0.07592	563.3
0.07596	555
0.076	561.5
0.07604	555.8
0.07608	561.6
0.07612	556.9
0.07616	561.2
0.0762	557.7
0.07624	561
0.07628	558.2
0.07632	561.5
0.07636	558.4
0.0764	561.8
0.07644	559.3
0.07648	561.5
0.07652	560.2
0.07656	561
0.0766	560.1
0.07664	560.2
0.07668	561.7
0.07672	558.8
0.07676	563.3
0.0768	556.2
0.07684	563.5
0.07688	555.4
0.07692	563.6
0.07696	555.2
0.077	562.7
0.07704	554.9
0.07708	562.4
0.07712	555.2
0.07716	561.6
0.0772	556.7
0.07724	560.8
0.07728	556.4
0.07732	561.3
0.07736	557.5
0.0774	561.4
0.07744	557.7
0.07748	561
0.07752	558.5
0.07756	561.8
0.0776	559.1
0.07764	561.9
0.07768	559.7
0.07772	561.1
0.07776	561
0.0778	560.1
0.07784	562.1
0.07788	558.9
0.07792	563.2
0.07796	556.8
0.078	563.6
0.07804	555.5
0.07808	563.3
0.07812	554.9
0.07816	563
0.0782	554.7
0.07824	562.1
0.07828	555
0.07832	561.2
0.07836	556
0.0784	561.3
0.07844	557.2
0.07848	560.9
0.07852	557.2
0.07856	561.6
0.0786	558.3
0.07864	561.5
0.07868	558
0.07872	562.4
0.07876	559.1
0.0788	561.8
0.07884	560.1
0.07888	561.4
0.07892	561.4
0.07896	559.1
0.079	562.2
0.07904	558
0.07908	562.8
0.07912	556.6
0.07916	562.9
0.0792	556
0.07924	562.3
0.07928	555.1
0.07932	563.3
0.07936	555
0.0794	561.8
0.07944	555.1
0.07948	561.9
0.07952	556
0.07956	561.4
0.0796	556.4
0.07964	561.1
0.07968	557.5
0.07972	561.6
0.07976	557.8
0.0798	561.8
0.07984	558.6
0.07988	561.9
0.07992	559.7
[truncated: 98,001 more rows]

## Sheet: Sheet1
		100	50
time	data	butfilt1	Strain
0.6	11.24	10.7871	0.784259
0.60004	6.976	10.787	0.78426
0.60008	11.19	10.7872	0.784256
0.60012	7.263	10.7877	0.784245
0.60016	11.62	10.7886	0.784229
0.6002	7.742	10.7897	0.784206
0.60024	12	10.7911	0.784177
0.60028	8.364	10.7929	0.784141
0.60032	11.95	10.7951	0.784099
0.60036	8.747	10.7975	0.78405
0.6004	11.71	10.8003	0.783994
0.60044	9.704	10.8035	0.78393
0.60048	11.38	10.807	0.78386
0.60052	10.95	10.8109	0.783782
0.60056	10.23	10.8151	0.783697
0.6006	11.91	10.8198	0.783605
0.60064	9.752	10.8248	0.783504
0.60068	12.67	10.8302	0.783397
0.60072	8.268	10.836	0.783281
0.60076	12.48	10.8422	0.783157
0.6008	7.024	10.8487	0.783025
0.60084	12.43	10.8558	0.782885
0.60088	6.832	10.8632	0.782737
0.60092	11.81	10.871	0.78258
0.60096	6.689	10.8793	0.782414
0.601	11.33	10.888	0.782241
0.60104	6.976	10.8971	0.782058
0.60108	11.62	10.9066	0.781867
0.60112	7.455	10.9166	0.781668
0.60116	11.57	10.927	0.781459
0.6012	8.316	10.9379	0.781242
0.60124	11.52	10.9492	0.781017
0.60128	8.22	10.9609	0.780782
0.60132	12	10.973	0.780539
0.60136	9.13	10.9856	0.780288
0.6014	12.34	10.9986	0.780028
0.60144	9.417	11.012	0.779759
0.60148	12.58	11.0259	0.779482
0.60152	10.23	11.0402	0.779197
0.60156	12.15	11.0549	0.778903
0.6016	11.19	11.07	0.7786
0.60164	11.52	11.0855	0.77829
0.60168	12.15	11.1015	0.777971
0.60172	10.57	11.1178	0.777644
0.60176	12.96	11.1346	0.777308
0.6018	9.273	11.1518	0.776965
0.60184	13.39	11.1693	0.776613
0.60188	8.125	11.1873	0.776253
0.60192	13.29	11.2057	0.775885
0.60196	7.885	11.2246	0.775509
0.602	13.39	11.2438	0.775125
0.60204	7.694	11.2634	0.774732
0.60208	13.15	11.2834	0.774332
0.60212	7.646	11.3038	0.773923
0.60216	12.67	11.3247	0.773507
0.6022	7.981	11.3459	0.773082
0.60224	12.34	11.3675	0.77265
0.60228	8.651	11.3895	0.77221
0.60232	12.53	11.4119	0.771763
0.60236	9.226	11.4346	0.771308
0.6024	12.91	11.4577	0.770845
0.60244	9.656	11.4812	0.770375
0.60248	12.67	11.5051	0.769898
0.60252	10.04	11.5293	0.769413
0.60256	13.96	11.5539	0.768922
0.6026	10.9	11.5788	0.768423
0.60264	12.91	11.6041	0.767918
0.60268	11.76	11.6297	0.767406
0.60272	12.86	11.6556	0.766887
0.60276	13.77	11.6819	0.766362
0.6028	11.33	11.7085	0.76583
0.60284	13.06	11.7354	0.765291
0.60288	10.76	11.7627	0.764747
0.60292	14.3	11.7902	0.764196
0.60296	9.752	11.8181	0.763638
0.603	14.25	11.8463	0.763075
0.60304	8.699	11.8748	0.762505
0.60308	14.11	11.9036	0.761929
0.60312	8.364	11.9327	0.761347
0.60316	14.16	11.9621	0.760759
0.6032	8.651	11.9918	0.760165
0.60324	13.73	12.0218	0.759565
0.60328	8.747	12.052	0.758959
0.60332	12.91	12.0826	0.758348
0.60336	9.561	12.1135	0.757731
0.6034	13.68	12.1446	0.757108
0.60344	9.752	12.176	0.75648
0.60348	13.77	12.2077	0.755847
0.60352	10.14	12.2396	0.755208
0.60356	14.06	12.2718	0.754564
0.6036	11.09	12.3042	0.753915
0.60364	14.73	12.3369	0.753262
0.60368	11.43	12.3698	0.752603
0.60372	14.44	12.403	0.75194
0.60376	12.38	12.4364	0.751273
0.6038	14.44	12.47	0.7506
0.60384	13.29	12.5038	0.749924
0.60388	12.96	12.5379	0.749243
0.60392	14.63	12.5721	0.748558
0.60396	11.95	12.6066	0.747868
0.604	15.5	12.6413	0.747175
0.60404	10.66	12.6761	0.746477
0.60408	15.5	12.7112	0.745776
0.60412	10.14	12.7465	0.74507
0.60416	15.3	12.782	0.744361
0.6042	10.04	12.8177	0.743647
0.60424	15.11	12.8535	0.742929
0.60428	9.752	12.8896	0.742208
0.60432	14.44	12.9258	0.741483
0.60436	9.896	12.9623	0.740754
0.6044	14.35	12.9989	0.740021
0.60444	10.37	13.0357	0.739285
0.60448	14.54	13.0727	0.738545
0.60452	10.57	13.1099	0.737802
0.60456	14.35	13.1473	0.737055
0.6046	10.95	13.1848	0.736304
0.60464	14.92	13.2225	0.735551
0.60468	11.81	13.2603	0.734794
0.60472	15.45	13.2983	0.734034
0.60476	12.15	13.3365	0.733271
0.6048	15.3	13.3748	0.732505
0.60484	13.25	13.4132	0.731736
0.60488	15.5	13.4518	0.730964
0.60492	13.92	13.4905	0.73019
0.60496	14.06	13.5294	0.729412
0.605	15.16	13.5684	0.728633
0.60504	13.29	13.6075	0.72785
0.60508	15.88	13.6467	0.727065
0.60512	12.1	13.6861	0.726278
0.60516	16.21	13.7256	0.725488
0.6052	11.62	13.7652	0.724695
0.60524	16.21	13.805	0.7239
0.60528	11	13.8449	0.723103
0.60532	16.41	13.8848	0.722303
0.60536	10.66	13.925	0.721501
0.6054	15.45	13.9652	0.720696
0.60544	10.66	14.0055	0.719889
0.60548	15.11	14.046	0.71908
0.60552	10.9	14.0866	0.718269
0.60556	15.4	14.1273	0.717455
0.6056	11.57	14.168	0.716639
0.60564	15.5	14.2089	0.715821
0.60568	11.76	14.2499	0.715001
0.60572	15.78	14.291	0.714179
0.60576	13.25	14.3322	0.713355
0.6058	16.17	14.3735	0.71253
0.60584	13.49	14.4149	0.711703
0.60588	16.6	14.4563	0.710874
0.60592	13.92	14.4978	0.710043
0.60596	16.41	14.5394	0.709212
0.606	14.44	14.5811	0.708378
0.60604	15.45	14.6228	0.707544
0.60608	15.69	14.6646	0.706708
0.60612	14.78	14.7065	0.705871
0.60616	17.17	14.7484	0.705032
0.6062	13.68	14.7904	0.704193
0.60624	17.46	14.8324	0.703352
0.60628	12.53	14.8745	0.70251
0.60632	17.79	14.9167	0.701667
0.60636	12.05	14.9589	0.700823
0.6064	17.41	15.0011	0.699978
0.60644	11.91	15.0434	0.699131
0.60648	16.65	15.0858	0.698284
0.60652	11.95	15.1282	0.697435
0.60656	16.65	15.1707	0.696586
0.6066	11.76	15.2132	0.695736
0.60664	16.45	15.2558	0.694884
0.60668	12.67	15.2984	0.694032
0.60672	16.5	15.341	0.693179
0.60676	13.2	15.3837	0.692325
0.6068	16.88	15.4265	0.691471
0.60684	13.49	15.4692	0.690616
0.60688	17.32	15.512	0.68976
0.60692	14.25	15.5548	0.688904
0.60696	17.6	15.5976	0.688048
0.607	14.97	15.6405	0.687191
0.60704	17.27	15.6833	0.686334
0.60708	15.83	15.7262	0.685476
0.60712	16.93	15.769	0.684619
0.60716	16.79	15.8119	0.683762
0.6072	16.41	15.8548	0.682904
0.60724	17.94	15.8977	0.682047
0.60728	15.07	15.9405	0.681189
0.60732	18.03	15.9834	0.680332
0.60736	14.16	16.0263	0.679474
0.6074	18.8	16.0691	0.678617
0.60744	13.25	16.112	0.67776
0.60748	18.56	16.1548	0.676903
0.60752	13.49	16.1977	0.676046
0.60756	18.03	16.2405	0.67519
0.6076	12.86	16.2833	0.674333
0.60764	17.99	16.3261	0.673477
0.60768	13.34	16.3689	0.672621
0.60772	18.03	16.4117	0.671765
0.60776	13.77	16.4545	0.67091
0.6078	17.94	16.4973	0.670055
0.60784	14.59	16.54	0.6692
0.60788	17.7	16.5827	0.668346
0.60792	14.97	16.6254	0.667492
0.60796	18.75	16.668	0.666639
0.608	15.45	16.7107	0.665787
0.60804	18.75	16.7533	0.664935
0.60808	15.59	16.7958	0.664084
0.60812	19.28	16.8383	0.663234
0.60816	16.55	16.8808	0.662384
0.6082	18.51	16.9232	0.661536
0.60824	17.89	16.9656	0.660688
0.60828	17.94	17.0079	0.659841
0.60832	18.8	17.0502	0.658996
0.60836	16.5	17.0925	0.658151
0.6084	20.47	17.1346	0.657307
0.60844	15.21	17.1768	0.656465
0.60848	19.66	17.2189	0.655623
0.60852	14.68	17.2609	0.654782
0.60856	19.66	17.3029	0.653942
0.6086	14.78	17.3449	0.653103
0.60864	19.56	17.3868	0.652265
0.60868	14.06	17.4286	0.651427
0.60872	18.85	17.4704	0.650591
0.60876	14.4	17.5122	0.649755
0.6088	18.8	17.554	0.648921
0.60884	15.54	17.5957	0.648087
0.60888	18.85	17.6373	0.647254
0.60892	15.02	17.6789	0.646422
0.60896	18.94	17.7205	0.645591
0.609	15.64	17.762	0.64476
0.60904	19.47	17.8035	0.643931
0.60908	16.36	17.8449	0.643103
0.60912	20.19	17.8862	0.642275
0.60916	16.88	17.9275	0.641449
0.6092	19.61	17.9688	0.640624
0.60924	17.32	18.01	0.6398
0.60928	19.18	18.0511	0.638977
0.60932	19.33	18.0922	0.638156
0.60936	18.66	18.1332	0.637335
0.6094	20.28	18.1742	0.636516
0.60944	17.79	18.2151	0.635698
0.60948	21.05	18.256	0.634881
0.60952	16.6	18.2968	0.634065
0.60956	21.53	18.3375	0.63325
0.6096	16.26	18.3782	0.632437
0.60964	20.86	18.4188	0.631624
0.60968	15.02	18.4594	0.630812
0.60972	20.81	18.4999	0.630002
0.60976	15.69	18.5404	0.629192
0.6098	20.24	18.5808	0.628383
0.60984	15.4	18.6212	0.627575
0.60988	19.71	18.6616	0.626768
0.60992	16.17	18.7019	0.625962
0.60996	19.85	18.7422	0.625157
0.61	16.21	18.7824	0.624352
0.61004	20.38	18.8226	0.623549
0.61008	16.5	18.8627	0.622746
0.61012	20.62	18.9028	0.621944
0.61016	17.51	18.9429	0.621143
0.6102	21	18.9829	0.620343
0.61024	18.13	19.0228	0.619543
0.61028	20.57	19.0628	0.618745
0.61032	18.7	19.1026	0.617947
0.61036	21.14	19.1425	0.617151
0.6104	19.85	19.1822	0.616355
0.61044	19.66	19.222	0.615561
0.61048	20.95	19.2617	0.614767
0.61052	18.94	19.3013	0.613974
0.61056	21.48	19.3409	0.613182
0.6106	17.79	19.3805	0.61239
0.61064	21.86	19.42	0.6116
0.61068	17.32	19.4595	0.61081
0.61072	21.67	19.499	0.610021
0.61076	16.31	19.5384	0.609232
0.6108	21.62	19.5778	0.608444
0.61084	16.93	19.6171	0.607657
0.61088	21.48	19.6565	0.60687
0.61092	16.45	19.6958	0.606084
0.61096	21.1	19.7351	0.605298
0.611	16.6	19.7744	0.604512
0.61104	21.05	19.8136	0.603727
0.61108	17.32	19.8529	0.602943
0.61112	20.91	19.8921	0.602158
0.61116	18.08	19.9313	0.601374
0.6112	21.43	19.9705	0.600591
0.61124	18.18	20.0096	0.599808
0.61128	21.58	20.0487	0.599025
0.61132	18.94	20.0878	0.598243
0.61136	22.1	20.1269	0.597461
0.6114	19.71	20.166	0.59668
0.61144	21.72	20.205	0.595899
0.61148	20.38	20.2441	0.595119
0.61152	21.05	20.283	0.594339
0.61156	21.34	20.322	0.59356
0.6116	20.09	20.361	0.592781
0.61164	22.68	20.3999	0.592003
0.61168	19.04	20.4388	0.591225
0.61172	23.11	20.4777	0.590447
0.61176	18.08	20.5165	0.58967
0.6118	23.15	20.5554	0.588893
0.61184	17.75	20.5942	0.588116
0.61188	22.92	20.633	0.587339
0.61192	17.75	20.6718	0.586563
0.61196	22.29	20.7106	0.585787
0.612	17.46	20.7494	0.585011
0.61204	22.15	20.7882	0.584235
0.61208	17.99	20.827	0.58346
0.61212	21.77	20.8658	0.582684
0.61216	18.08	20.9046	0.581908
0.6122	22.1	20.9434	0.581133
0.61224	18.75	20.9821	0.580358
0.61228	22.63	21.0209	0.579582
0.61232	19.47	21.0596	0.578807
0.61236	22.96	21.0984	0.578032
0.6124	19.52	21.1371	0.577257
0.61244	23.01	21.1759	0.576483
0.61248	20.57	21.2146	0.575709
0.61252	23.11	21.2533	0.574934
0.61256	21.48	21.292	0.574161
0.6126	21.77	21.3307	0.573387
0.61264	22.39	21.3693	0.572614
0.61268	21.43	21.408	0.571841
0.61272	23.54	21.4466	0.571068
0.61276	20.14	21.4852	0.570295
0.6128	24.21	21.5239	0.569523
0.61284	18.89	21.5625	0.56875
0.61288	23.49	21.6011	0.567978
0.61292	18.8	21.6397	0.567206
0.61296	23.92	21.6783	0.566435
0.613	18.61	21.7169	0.565663
0.61304	23.01	21.7554	0.564891
0.61308	18.7	21.794	0.56412
0.61312	23.2	21.8326	0.563348
0.61316	18.61	21.8712	0.562577
0.6132	23.44	21.9097	0.561805
0.61324	19.33	21.9483	0.561034
0.61328	23.83	21.9869	0.560263
0.61332	20.33	22.0254	0.559491
0.61336	23.25	22.064	0.558721
0.6134	20.09	22.1025	0.55795
0.61344	24.21	22.141	0.557179
0.61348	20.71	22.1795	0.556409
0.61352	24.26	22.218	0.555639
0.61356	21.91	22.2565	0.554869
0.6136	24.64	22.295	0.5541
0.61364	22.1	22.3334	0.553331
0.61368	23.68	22.3719	0.552563
0.61372	23.11	22.4103	0.551794
0.61376	23.15	22.4487	0.551026
0.6138	24.69	22.4871	0.550259
0.61384	21.38	22.5254	0.549492
0.61388	25.26	22.5638	0.548725
0.61392	20.86	22.6021	0.547958
0.61396	25.07	22.6404	0.547192
0.614	19.8	22.6787	0.546426
0.61404	25.17	22.717	0.54566
0.61408	19.85	22.7553	0.544894
0.61412	24.69	22.7936	0.544129
0.61416	19.61	22.8319	0.543363
0.6142	24.21	22.8701	0.542597
0.61424	19.95	22.9084	0.541832
0.61428	24.02	22.9467	0.541066
0.61432	20.43	22.985	0.5403
0.61436	24.26	23.0233	0.539535
0.6144	20.71	23.0615	0.538769
0.61444	24.54	23.0998	0.538003
0.61448	21.24	23.1381	0.537238
0.61452	24.83	23.1764	0.536472
0.61456	21.48	23.2147	0.535706
0.6146	25.17	23.253	0.534941
0.61464	22.29	23.2912	0.534175
0.61468	25.07	23.3295	0.53341
0.61472	23.25	23.3678	0.532644
0.61476	24.4	23.406	0.531879
0.6148	24.3	23.4443	0.531114
0.61484	23.59	23.4826	0.530349
0.61488	25.31	23.5208	0.529584
0.61492	23.2	23.559	0.528819
0.61496	25.79	23.5973	0.528054
0.615	21.67	23.6355	0.52729
0.61504	26.36	23.6738	0.526525
0.61508	21.05	23.712	0.52576
0.61512	26.41	23.7503	0.524995
0.61516	20.71	23.7885	0.52423
0.6152	25.69	23.8268	0.523465
0.61524	20.95	23.865	0.522699
0.61528	25.21	23.9033	0.521934
0.61532	20.81	23.9416	0.521168
0.61536	25.5	23.9799	0.520402
0.6154	21.19	24.0182	0.519636
0.61544	25.07	24.0565	0.518869
0.61548	21.67	24.0949	0.518102
0.61552	25.17	24.1332	0.517335
0.61556	22.29	24.1716	0.516568
0.6156	25.64	24.21	0.515801
0.61564	22.53	24.2483	0.515033
0.61568	26.17	24.2867	0.514265
0.61572	23.3	24.3251	0.513498
0.61576	26.46	24.3635	0.51273
0.6158	24.06	24.4019	0.511961
0.61584	26.17	24.4403	0.511193
0.61588	24.83	24.4787	0.510425
0.61592	25.21	24.5172	0.509657
0.61596	25.98	24.5556	0.508889
0.616	24.21	24.594	0.50812
0.61604	26.94	24.6324	0.507352
0.61608	23.44	24.6709	0.506583
0.61612	26.79	24.7093	0.505814
0.61616	22.25	24.7477	0.505045
0.6162	27.51	24.7862	0.504276
0.61624	21.67	24.8247	0.503506
0.61628	26.98	24.8632	0.502737
0.61632	21.77	24.9017	0.501967
0.61636	26.46	24.9402	0.501196
0.6164	21.77	24.9787	0.500425
0.61644	25.93	25.0173	0.499654
0.61648	22.48	25.0559	0.498883
0.61652	26.22	25.0945	0.498111
0.61656	22.96	25.1331	0.497338
0.6166	26.6	25.1717	0.496565
0.61664	22.87	25.2104	0.495792
0.61668	26.98	25.2491	0.495019
0.61672	23.39	25.2877	0.494245
0.61676	28.04	25.3265	0.493471
0.6168	24.06	25.3652	0.492697
0.61684	26.98	25.4039	0.491922
0.61688	25.07	25.4426	0.491147
0.61692	27.32	25.4814	0.490372
0.61696	25.6	25.5202	0.489597
0.617	26.31	25.5589	0.488821
0.61704	27.18	25.5977	0.488045
0.61708	25.69	25.6365	0.487269
0.61712	27.46	25.6754	0.486493
0.61716	24.11	25.7142	0.485716
0.6172	28.28	25.753	0.484939
0.61724	23.39	25.7919	0.484162
0.61728	28.09	25.8308	0.483384
0.61732	22.53	25.8697	0.482606
0.61736	27.89	25.9086	0.481828
0.6174	22.68	25.9476	0.481048
0.61744	27.46	25.9866	0.480269
0.61748	22.68	26.0256	0.479489
0.61752	27.42	26.0646	0.478708
0.61756	23.54	26.1037	0.477927
0.6176	27.46	26.1428	0.477145
0.61764	23.87	26.1819	0.476363
0.61768	27.75	26.221	0.47558
0.61772	24.06	26.2602	0.474796
0.61776	27.61	26.2994	0.474013
0.6178	24.78	26.3386	0.473228
0.61784	28.23	26.3778	0.472444
0.61788	25.02	26.4171	0.471658
0.61792	28.52	26.4564	0.470873
0.61796	25.84	26.4956	0.470087
0.618	28.47	26.535	0.469301
0.61804	26.75	26.5743	0.468514
0.61808	27.65	26.6136	0.467727
0.61812	28.04	26.653	0.46694
0.61816	26.22	26.6924	0.466153
0.6182	28.9	26.7318	0.465365
0.61824	25.21	26.7712	0.464576
0.61828	29.76	26.8106	0.463788
0.61832	24.16	26.8501	0.462999
0.61836	29.81	26.8895	0.462209
0.6184	23.78	26.929	0.461419
0.61844	29.19	26.9686	0.460628
0.61848	23.59	27.0081	0.459837
0.61852	28.56	27.0477	0.459046
0.61856	23.92	27.0873	0.458253
0.6186	28.71	27.127	0.45746
0.61864	24.16	27.1667	0.456667
0.61868	28.56	27.2064	0.455873
0.61872	24.54	27.2461	0.455078
0.61876	28.42	27.2859	0.454283
0.6188	25.12	27.3257	0.453487
0.61884	29.47	27.3655	0.45269
0.61888	25.5	27.4053	0.451893
0.61892	29.47	27.4452	0.451096
0.61896	25.93	27.4851	0.450298
0.619	29.66	27.525	0.449499
0.61904	27.51	27.565	0.4487
0.61908	29.66	27.605	0.447901
0.61912	28.18	27.645	0.447101
0.61916	28.61	27.685	0.446301
0.6192	29.04	27.725	0.4455
0.61924	27.8	27.7651	0.444699
0.61928	29.33	27.8051	0.443897
0.61932	26.51	27.8452	0.443095
0.61936	30.43	27.8854	0.442292
0.6194	25.45	27.9255	0.441489
0.61944	29.95	27.9657	0.440685
0.61948	25.17	28.006	0.439881
0.61952	30.19	28.0462	0.439076
0.61956	25.4	28.0865	0.43827
0.6196	29.33	28.1268	0.437463
0.61964	24.69	28.1672	0.436656
0.61968	29.9	28.2076	0.435847
0.61972	25.64	28.2481	0.435038
0.61976	28.85	28.2886	0.434229
0.6198	25.6	28.3291	0.433418
0.61984	29.23	28.3697	0.432606
0.61988	26.12	28.4103	0.431794
0.61992	30.34	28.4509	0.430981
0.61996	26.79	28.4916	0.430168
0.62	30.24	28.5323	0.429353
0.62004	27.32	28.5731	0.428538
0.62008	30.34	28.6139	0.427723
0.62012	27.75	28.6547	0.426906
0.62016	31.05	28.6955	0.426089
0.6202	28.47	28.7364	0.425272
0.62024	29.52	28.7773	0.424454
0.62028	29.76	28.8182	0.423635
0.62032	28.61	28.8592	0.422816
0.62036	31.1	28.9002	0.421996
0.6204	26.98	28.9412	0.421176
0.62044	31.53	28.9823	0.420355
0.62048	26.98	29.0233	0.419533
0.62052	31.72	29.0644	0.418711
0.62056	26.41	29.1056	0.417889
0.6206	31.24	29.1467	0.417065
0.62064	25.64	29.1879	0.416241
0.62068	30.91	29.2292	0.415416
0.62072	26.17	29.2705	0.414591
0.62076	31.05	29.3118	0.413765
0.6208	26.03	29.3531	0.412938
0.62084	30.24	29.3945	0.41211
0.62088	26.75	29.4359	0.411282
0.62092	30.77	29.4773	0.410453
0.62096	26.98	29.5188	0.409624
0.621	31.2	29.5603	0.408794
0.62104	27.51	29.6018	0.407964
0.62108	31.05	29.6434	0.407133
0.62112	28.09	29.6849	0.406301
0.62116	31.68	29.7265	0.405469
0.6212	28.8	29.7681	0.404637
0.62124	31.63	29.8097	0.403805
0.62128	29.52	29.8514	0.402972
0.62132	30.77	29.893	0.40214
0.62136	30.72	29.9347	0.401307
0.6214	30.14	29.9763	0.400473
0.62144	31.77	30.018	0.39964
0.62148	29.23	30.0597	0.398807
0.62152	32.39	30.1013	0.397974
0.62156	28.28	30.143	0.39714
0.6216	32.97	30.1847	0.396307
0.62164	27.61	30.2264	0.395473
0.62168	32.78	30.268	0.394639
0.62172	26.84	30.3097	0.393806
0.62176	32.25	30.3514	0.392972
0.6218	27.22	30.3931	0.392138
0.62184	32.06	30.4348	0.391304
0.62188	27.27	30.4765	0.39047
0.62192	32.06	30.5182	0.389636
0.62196	27.75	30.5599	0.388802
0.622	31.68	30.6016	0.387969
0.62204	28.28	30.6433	0.387135
0.62208	32.01	30.6849	0.386301
0.62212	29.09	30.7266	0.385468
0.62216	32.39	30.7682	0.384635
0.6222	29.52	30.8099	0.383802
0.62224	32.63	30.8515	0.38297
0.62228	29.81	30.8931	0.382138
0.62232	33.64	30.9347	0.381307
0.62236	30.24	30.9762	0.380476
0.6224	32.3	31.0177	0.379646
0.62244	31.96	31.0592	0.378816
0.62248	31.53	31.1007	0.377987
0.62252	32.87	31.1421	0.377159
0.62256	30.14	31.1835	0.376331
0.6226	33.78	31.2248	0.375504
0.62264	29.52	31.2661	0.374678
0.62268	33.88	31.3074	0.373852
0.62272	28.8	31.3486	0.373027
0.62276	33.59	31.3898	0.372203
0.6228	28.56	31.431	0.37138
0.62284	33.4	31.4722	0.370557
0.62288	28.18	31.5133	0.369735
0.62292	33.78	31.5543	0.368914
0.62296	28.61	31.5954	0.368093
0.623	32.68	31.6364	0.367273
0.62304	28.9	31.6773	0.366454
0.62308	33.06	31.7182	0.365635
0.62312	29.52	31.7591	0.364818
0.62316	33.25	31.7999	0.364001
0.6232	30.38	31.8407	0.363185
0.62324	33.69	31.8815	0.362371
0.62328	30.48	31.9222	0.361557
0.62332	34.5	31.9628	0.360744
0.62336	31.2	32.0034	0.359932
0.6234	33.88	32.0439	0.359121
0.62344	31.91	32.0844	0.358312
0.62348	33.3	32.1248	0.357504
0.62352	32.63	32.1652	0.356696
0.62356	33.16	32.2055	0.35589
0.6236	33.54	32.2457	0.355086
0.62364	31.87	32.2859	0.354282
0.62368	34.4	32.326	0.35348
0.62372	30.72	32.3661	0.352678
0.62376	35.03	32.4061	0.351878
0.6238	29.52	32.446	0.351079
0.62384	35.22	32.4859	0.350281
0.62388	29.28	32.5258	0.349485
0.62392	34.98	32.5656	0.348689
0.62396	29.33	32.6053	0.347894
0.624	34.31	32.645	0.347101
0.62404	29.23	32.6846	0.346308
0.62408	34.02	32.7242	0.345517
0.62412	30.05	32.7637	0.344727
0.62416	34.45	32.8031	0.343937
0.6242	30.48	32.8425	0.343149
0.62424	33.97	32.8819	0.342362
0.62428	30.96	32.9212	0.341576
0.62432	34.4	32.9604	0.340791
0.62436	31.39	32.9996	0.340008
0.6244	35.27	33.0387	0.339225
0.62444	32.2	33.0778	0.338444
0.62448	35.03	33.1168	0.337664
0.62452	32.58	33.1557	0.336886
0.62456	35.22	33.1946	0.336109
0.6246	33.88	33.2333	0.335333
0.62464	33.97	33.2721	0.334559
0.62468	34.74	33.3107	0.333786
0.62472	32.78	33.3493	0.333014
0.62476	35.6	33.3878	0.332244
0.6248	31.77	33.4262	0.331475
0.62484	36.27	33.4646	0.330708
0.62488	30.91	33.5029	0.329941
0.62492	36.17	33.5412	0.329176
0.62496	30.34	33.5794	0.328413
0.625	35.46	33.6175	0.32765
0.62504	30.53	33.6556	0.326889
0.62508	35.41	33.6936	0.326129
0.62512	30.67	33.7315	0.32537
0.62516	35.12	33.7694	0.324612
0.6252	30.53	33.8073	0.323855
0.62524	35.07	33.845	0.323099
0.62528	31.34	33.8828	0.322345
0.62532	35.27	33.9204	0.321592
0.62536	31.91	33.958	0.320839
0.6254	35.65	33.9956	0.320089
0.62544	32.2	34.033	0.319339
0.62548	35.94	34.0705	0.318591
0.62552	32.97	34.1078	0.317844
0.62556	36.37	34.1451	0.317098
0.6256	33.59	34.1823	0.316354
0.62564	35.84	34.2194	0.315612
0.62568	34.31	34.2565	0.31487
0.62572	35.6	34.2935	0.31413
0.62576	35.41	34.3304	0.313392
0.6258	34.31	34.3673	0.312655
0.62584	36.46	34.404	0.311919
0.62588	33.69	34.4407	0.311185
0.62592	36.7	34.4774	0.310453
0.62596	32.3	34.5139	0.309721
0.626	37.04	34.5504	0.308991
0.62604	31.72	34.5869	0.308263
0.62608	37.71	34.6232	0.307535
0.62612	31.24	34.6595	0.306809
0.62616	36.22	34.6958	0.306084
0.6262	31.24	34.732	0.30536
0.62624	35.84	34.7681	0.304638
0.62628	32.01	34.8042	0.303917
0.62632	36.13	34.8402	0.303196
0.62636	32.54	34.8761	0.302477
0.6264	35.94	34.912	0.30176
0.62644	32.82	34.9478	0.301043
0.62648	36.89	34.9836	0.300328
0.62652	32.92	35.0193	0.299614
0.62656	36.27	35.055	0.298901
0.6266	33.83	35.0905	0.298189
0.62664	36.65	35.126	0.297479
0.62668	34.4	35.1615	0.29677
0.62672	37.37	35.1969	0.296063
0.62676	35.07	35.2322	0.295357
0.6268	36.41	35.2674	0.294652
0.62684	36.17	35.3026	0.293949
0.62688	35.36	35.3376	0.293247
0.62692	37.66	35.3727	0.292547
0.62696	34.88	35.4076	0.291848
0.627	37.99	35.4425	0.29115
0.62704	33.78	35.4773	0.290454
0.62708	38.14	35.512	0.289759
0.62712	33.21	35.5467	0.289066
0.62716	38.38	35.5813	0.288374
0.6272	32.39	35.6159	0.287683
0.62724	37.42	35.6504	0.286993
0.62728	32.25	35.6848	0.286304
0.62732	37.85	35.7192	0.285617
0.62736	32.58	35.7535	0.28493
0.6274	37.08	35.7878	0.284245
0.62744	33.06	35.822	0.283561
0.62748	37.13	35.8561	0.282878
0.62752	33.59	35.8902	0.282196
0.62756	37.47	35.9243	0.281515
0.6276	34.21	35.9583	0.280835
0.62764	37.71	35.9922	0.280156
0.62768	34.21	36.0261	0.279478
0.62772	37.95	36.0599	0.278802
0.62776	35.17	36.0937	0.278126
0.6278	38.14	36.1274	0.277452
0.62784	35.94	36.1611	0.276779
0.62788	37.23	36.1946	0.276107
0.62792	37.13	36.2282	0.275436
0.62796	37.18	36.2617	0.274767
0.628	37.47	36.2951	0.274098
0.62804	35.98	36.3285	0.273431
0.62808	38.38	36.3618	0.272764
0.62812	34.98	36.3951	0.272099
0.62816	39.14	36.4283	0.271435
0.6282	33.97	36.4614	0.270771
0.62824	39.29	36.4946	0.270109
0.62828	33.35	36.5277	0.269447
0.62832	38.47	36.5607	0.268786
0.62836	33.49	36.5937	0.268126
0.6284	38.28	36.6267	0.267466
0.62844	33.64	36.6596	0.266808
0.62848	38.19	36.6925	0.26615
0.62852	34.16	36.7254	0.265492
0.62856	38.14	36.7582	0.264835
0.6286	34.31	36.7911	0.264179
0.62864	38.57	36.8238	0.263523
0.62868	34.88	36.8566	0.262868
0.62872	38.71	36.8893	0.262213
0.62876	35.03	36.922	0.261559
0.6288	39	36.9547	0.260906
0.62884	36.03	36.9873	0.260253
0.62888	39.24	37.02	0.259601
0.62892	36.17	37.0526	0.258949
0.62896	38.71	37.0851	0.258298
0.629	37.95	37.1177	0.257647
0.62904	38.19	37.1502	0.256997
0.62908	38.38	37.1827	0.256347
0.62912	36.89	37.2151	0.255697
0.62916	39.29	37.2476	0.255048
0.6292	36.13	37.28	0.254399
0.62924	39.86	37.3125	0.253751
0.62928	34.98	37.3449	0.253103
0.62932	39.76	37.3773	0.252454
0.62936	34.5	37.4097	0.251806
0.6294	38.38	37.4421	0.251158
0.62944	34.07	37.4745	0.25051
0.62948	39.43	37.5069	0.249861
0.62952	34.31	37.5394	0.249213
0.62956	39.05	37.5718	0.248564
0.6296	34.4	37.6043	0.247915
0.62964	39	37.6367	0.247265
0.62968	35.6	37.6692	0.246616
0.62972	38.95	37.7017	0.245966
0.62976	35.6	37.7342	0.245315
0.6298	39	37.7668	0.244665
0.62984	35.7	37.7993	0.244014
0.62988	39.38	37.8319	0.243363
0.62992	36.75	37.8645	0.242711
0.62996	39.86	37.897	0.242059
0.63	37.18	37.9297	0.241407
0.63004	39.38	37.9623	0.240754
0.63008	38.57	37.9949	0.240101
0.63012	39.05	38.0276	0.239448
0.63016	38.86	38.0603	0.238794
0.6302	38.19	38.093	0.23814
0.63024	40.24	38.1257	0.237486
0.63028	36.94	38.1585	0.236831
0.63032	40.91	38.1912	0.236176
0.63036	35.36	38.224	0.23552
0.6304	41.25	38.2569	0.234863
0.63044	35.41	38.2897	0.234206
0.63048	40.1	38.3226	0.233548
0.63052	35.03	38.3556	0.232889
0.63056	40.1	38.3885	0.232229
0.6306	35.12	38.4216	0.231569
0.63064	39.76	38.4546	0.230908
0.63068	35.74	38.4877	0.230245
0.63072	39.53	38.5209	0.229582
0.63076	35.94	38.5541	0.228918
0.6308	40.05	38.5873	0.228253
0.63084	36.13	38.6206	0.227587
0.63088	40.1	38.654	0.22692
0.63092	36.94	38.6874	0.226253
0.63096	40.53	38.7208	0.225584
0.631	37.52	38.7543	0.224914
0.63104	40.29	38.7878	0.224244
0.63108	37.66	38.8214	0.223572
0.63112	41.01	38.855	0.2229
0.63116	39.19	38.8887	0.222227
0.6312	40	38.9224	0.221553
0.63124	40.2	38.9561	0.220878
0.63128	38.86	38.9899	0.220202
0.63132	41.01	39.0237	0.219525
0.63136	37.37	39.0576	0.218848
0.6314	41.34	39.0915	0.218169
0.63144	36.8	39.1255	0.217489
0.63148	41.54	39.1596	0.216809
0.63152	36.37	39.1937	0.216127
0.63156	41.11	39.2278	0.215444
0.6316	35.98	39.262	0.214759
0.63164	41.3	39.2963	0.214074
0.63168	35.79	39.3306	0.213388
0.63172	40.58	39.365	0.2127
0.63176	36.46	39.3995	0.212011
0.6318	40.72	39.434	0.21132
0.63184	36.41	39.4686	0.210629
0.63188	40.72	39.5032	0.209936
0.63192	36.89	39.5379	0.209242
0.63196	40.77	39.5727	0.208547
0.632	37.9	39.6075	0.207851
0.63204	41.15	39.6423	0.207153
0.63208	38.04	39.6773	0.206455
0.63212	41.58	39.7122	0.205755
0.63216	38.57	39.7473	0.205055
0.6322	41.44	39.7823	0.204353
0.63224	39.96	39.8175	0.203651
0.63228	41.01	39.8526	0.202948
0.63232	40.48	39.8878	0.202243
0.63236	40.44	39.9231	0.201538
0.6324	42.01	39.9584	0.200832
0.63244	38.62	39.9937	0.200126
0.63248	42.16	40.0291	0.199418
0.63252	37.56	40.0645	0.198709
0.63256	42.45	40.1	0.198
0.6326	36.99	40.1355	0.19729
0.63264	42.45	40.1711	0.196579
0.63268	37.28	40.2067	0.195867
0.63272	42.11	40.2423	0.195154
0.63276	36.94	40.278	0.19444
0.6328	41.44	40.3137	0.193726
0.63284	38.19	40.3495	0.19301
0.63288	41.25	40.3853	0.192294
0.63292	37.71	40.4211	0.191577
0.63296	41.54	40.457	0.190859
0.633	38.09	40.493	0.190141
0.63304	42.21	40.5289	0.189422
0.63308	38.42	40.5649	0.188702
0.63312	42.01	40.6009	0.187982
0.63316	39.38	40.6369	0.187261
0.6332	43.02	40.673	0.18654
0.63324	39.76	40.7091	0.185819
0.63328	42.68	40.7452	0.185097
0.63332	40.72	40.7813	0.184375
0.63336	41.82	40.8174	0.183652
0.6334	41.54	40.8535	0.18293
0.63344	41.11	40.8896	0.182207
0.63348	42.97	40.9258	0.181484
0.63352	40.29	40.9619	0.180761
0.63356	43.59	40.9981	0.180038
0.6336	38.71	41.0342	0.179315
0.63364	43.93	41.0704	0.178592
0.63368	38.52	41.1066	0.177868
0.63372	43.83	41.1428	0.177145
0.63376	37.95	41.1789	0.176421
0.6338	43.07	41.2151	0.175698
0.63384	38.09	41.2513	0.174974
0.63388	43.12	41.2875	0.17425
0.63392	38.28	41.3237	0.173526
0.63396	42.64	41.3599	0.172802
0.634	38.71	41.3961	0.172078
0.63404	42.64	41.4323	0.171353
0.63408	38.9	41.4685	0.170629
0.63412	42.83	41.5047	0.169905
0.63416	39.81	41.5409	0.169181
0.6342	43.45	41.5771	0.168457
0.63424	40.15	41.6133	0.167734
0.63428	43.93	41.6495	0.16701
0.63432	40.67	41.6856	0.166287
0.63436	43.79	41.7218	0.165564
0.6344	41.49	41.7579	0.164842
0.63444	43.5	41.794	0.16412
0.63448	42.68	41.8301	0.163398
0.63452	42.59	41.8661	0.162677
0.63456	43.69	41.9022	0.161956
0.6346	41.3	41.9382	0.161236
0.63464	44.74	41.9742	0.160516
0.63468	40.29	42.0101	0.159797
0.63472	44.5	42.0461	0.159078
0.63476	39.38	42.082	0.15836
0.6348	44.5	42.1179	0.157641
0.63484	38.95	42.1538	0.156924
0.63488	44.65	42.1897	0.156206
0.63492	39.14	42.2255	0.155489
0.63496	43.69	42.2614	0.154772
0.635	39.05	42.2972	0.154056
0.63504	43.55	42.333	0.153339
0.63508	39.72	42.3688	0.152623
0.63512	43.69	42.4046	0.151908
0.63516	40	42.4404	0.151192
0.6352	43.59	42.4761	0.150477
0.63524	40.48	42.5119	0.149763
0.63528	44.22	42.5476	0.149048
0.63532	40.77	42.5833	0.148335
0.63536	44.55	42.6189	0.147621
0.6354	41.58	42.6546	0.146908
0.63544	44.46	42.6902	0.146196
0.63548	42.54	42.7258	0.145484
0.63552	44.6	42.7613	0.144773
0.63556	43.69	42.7969	0.144063
0.6356	43.79	42.8323	0.143353
0.63564	44.12	42.8678	0.142644
0.63568	42.35	42.9032	0.141935
0.63572	45.56	42.9386	0.141227
0.63576	41.44	42.974	0.14052
0.6358	45.75	43.0093	0.139813
0.63584	40.29	43.0447	0.139107
0.63588	45.65	43.08	0.138401
0.63592	39.76	43.1152	0.137696
0.63596	45.13	43.1505	0.136991
0.636	40.15	43.1857	0.136286
0.63604	45.41	43.2209	0.135582
0.63608	40.24	43.2561	0.134879
0.63612	44.89	43.2912	0.134176
0.63616	40	43.3264	0.133473
0.6362	44.7	43.3615	0.13277
0.63624	40.96	43.3966	0.132068
0.63628	44.6	43.4317	0.131367
0.63632	41.97	43.4667	0.130665
0.63636	44.89	43.5018	0.129965
0.6364	41.82	43.5368	0.129264
0.63644	45.7	43.5718	0.128564
0.63648	42.59	43.6068	0.127865
0.63652	45.89	43.6417	0.127166
0.63656	43.26	43.6766	0.126467
0.6366	45.17	43.7115	0.12577
0.63664	44.5	43.7464	0.125072
0.63668	44.6	43.7812	0.124375
0.63672	45.6	43.816	0.123679
0.63676	43.35	43.8508	0.122983
0.6368	46.47	43.8856	0.122288
0.63684	42.16	43.9203	0.121593
0.63688	46.71	43.9551	0.120899
0.63692	41.34	43.9898	0.120205
0.63696	46.66	44.0245	0.119511
0.637	41.01	44.0591	0.118817
0.63704	46.13	44.0938	0.118124
0.63708	40.91	44.1285	0.117431
0.63712	45.99	44.1631	0.116738
0.63716	40.82	44.1978	0.116045
0.6372	45.32	44.2324	0.115352
0.63724	41.44	44.267	0.114659
0.63728	45.41	44.3017	0.113966
0.63732	42.01	44.3363	0.113274
0.63736	45.6	44.371	0.112581
0.6374	41.97	44.4056	0.111888
0.63744	46.27	44.4402	0.111196
0.63748	42.83	44.4748	0.110503
0.63752	46.23	44.5095	0.109811
0.63756	43.45	44.5441	0.109118
0.6376	46.32	44.5787	0.108426
0.63764	44.03	44.6133	0.107734
0.63768	46.18	44.6479	0.107042
0.63772	45.27	44.6825	0.10635
0.63776	45.37	44.7171	0.105659
0.6378	46.42	44.7516	0.104967
0.63784	44.07	44.7862	0.104276
0.63788	46.94	44.8208	0.103584
0.63792	42.97	44.8554	0.102893
0.63796	47.18	44.8899	0.102202
0.638	42.3	44.9245	0.10151
0.63804	47.42	44.9591	0.100819
0.63808	41.78	44.9936	0.100127
0.63812	47.28	45.0282	0.0994358
0.63816	41.54	45.0628	0.0987441
0.6382	46.37	45.0974	0.0980523
0.63824	42.11	45.132	0.0973602
0.63828	46.27	45.1666	0.096668
0.63832	42.21	45.2012	0.0959756
0.63836	46.08	45.2358	0.0952831
0.6384	42.88	45.2705	0.0945904
0.63844	46.47	45.3051	0.0938975
0.63848	43.35	45.3398	0.0932046
0.63852	46.85	45.3744	0.0925116
0.63856	43.79	45.4091	0.0918185
0.6386	47.57	45.4437	0.0911255
0.63864	44.12	45.4784	0.0904325
0.63868	47.71	45.513	0.0897396
0.63872	45.17	45.5477	0.0890467
0.63876	47.14	45.5823	0.088354
0.6388	45.94	45.6169	0.0876615
0.63884	46.32	45.6515	0.086969
0.63888	46.85	45.6862	0.0862768
0.63892	44.84	45.7208	0.0855847
0.63896	47.81	45.7554	0.0848928
0.639	44.31	45.7899	0.0842011
0.63904	48.43	45.8245	0.0835095
0.63908	43.4	45.8591	0.082818
0.63912	48.38	45.8937	0.0821267
0.63916	42.92	45.9282	0.0814355
0.6392	47.62	45.9628	0.0807443
0.63924	42.73	45.9973	0.0800533
0.63928	47.76	46.0319	0.0793623
0.63932	42.59	46.0664	0.0786715
0.63936	47.33	46.101	0.0779807
0.6394	43.35	46.1355	0.07729
0.63944	46.99	46.17	0.0765995
0.63948	43.83	46.2045	0.0759091
0.63952	47.38	46.2391	0.0752189
0.63956	44.22	46.2736	0.074529
0.6396	48.09	46.308	0.0738394
0.63964	44.7	46.3425	0.0731501
0.63968	48.19	46.3769	0.0724612
0.63972	45.51	46.4114	0.0717727
0.63976	48.43	46.4458	0.0710847
0.6398	46.04	46.4801	0.0703973
0.63984	48.09	46.5145	0.0697105
0.63988	47.47	46.5488	0.0690242
0.63992	47.14	46.5831	0.0683386
0.63996	48	46.6173	0.0676536
0.64	46.42	46.6515	0.0669693
0.64004	48.72	46.6857	0.0662856
0.64008	45.17	46.7199	0.0656027
0.64012	49	46.754	0.0649203
0.64016	43.55	46.7881	0.0642387
0.6402	49.67	46.8221	0.0635577
0.64024	43.69	46.8561	0.0628773
0.64028	49.29	46.8901	0.0621976
0.64032	43.59	46.9241	0.0615185
0.64036	48.67	46.958	0.06084
0.6404	44.17	46.9919	0.0601622
0.64044	48.29	47.0257	0.0594851
0.64048	44.36	47.0596	0.0588087
0.64052	48.29	47.0934	0.0581329
0.64056	44.6	47.1271	0.0574579
0.6406	48.29	47.1608	0.0567837
0.64064	44.98	47.1945	0.0561103
0.64068	49.15	47.2281	0.0554378
0.64072	45.51	47.2617	0.0547661
0.64076	49.43	47.2952	0.0540955
0.6408	46.27	47.3287	0.0534258
0.64084	49.58	47.3621	0.0527572
0.64088	46.61	47.3955	0.0520897
0.64092	49.05	47.4288	0.0514233
0.64096	47.85	47.4621	0.0507581
0.641	48.62	47.4953	0.0500941
0.64104	48.81	47.5284	0.0494313
0.64108	47.33	47.5615	0.0487697
0.64112	49.72	47.5945	0.0481093
0.64116	46.23	47.6275	0.0474502
0.6412	50.34	47.6604	0.0467923
0.64124	45.03	47.6932	0.0461355
0.64128	50.3	47.726	0.04548
0.64132	44.5	47.7587	0.0448256
0.64136	49.96	47.7914	0.0441725
0.6414	44.65	47.824	0.0435204
0.64144	49.58	47.8565	0.0428696
0.64148	44.6	47.889	0.0422198
0.64152	49.29	47.9214	0.0415713
0.64156	44.98	47.9538	0.0409239
0.6416	49.39	47.9861	0.0402778
0.64164	45.65	48.0184	0.0396328
0.64168	49.39	48.0505	0.0389891
0.64172	46.04	48.0827	0.0383467
0.64176	49.48	48.1147	0.0377057
0.6418	46.56	48.1467	0.037066
0.64184	49.82	48.1786	0.0364277
0.64188	47.23	48.2105	0.035791
0.64192	50.2	48.2422	0.0351557
0.64196	48.09	48.2739	0.0345219
0.642	50.06	48.3055	0.0338898
0.64204	48.33	48.337	0.0332592
0.64208	49.53	48.3685	0.0326303
0.64212	49.67	48.3998	0.0320031
0.64216	48.38	48.4311	0.0313774
0.6422	50.3	48.4623	0.0307535
0.64224	47.66	48.4934	0.0301312
0.64228	51.21	48.5245	0.0295105
0.64232	46.27	48.5554	0.0288915
0.64236	51.44	48.5863	0.028274
0.6424	45.75	48.6171	0.0276582
0.64244	51.21	48.6478	0.0270439
0.64248	45.27	48.6784	0.0264312
0.64252	50.44	48.709	0.0258199
0.64256	45.32	48.7395	0.0252102
0.6426	50.44	48.7699	0.024602
0.64264	46.23	48.8002	0.0239952
0.64268	50.01	48.8305	0.02339
0.64272	46.37	48.8607	0.0227862
0.64276	50.15	48.8908	0.022184
0.6428	46.66	48.9208	0.0215833
0.64284	50.87	48.9508	0.0209841
0.64288	46.99	48.9807	0.0203866
0.64292	50.34	49.0105	0.0197906
0.64296	48.19	49.0402	0.0191963
0.643	50.97	49.0698	0.0186037
0.64304	48.43	49.0994	0.0180127
0.64308	50.63	49.1288	0.0174234
0.64312	48.86	49.1582	0.0168359
0.64316	49.91	49.1875	0.0162501
0.6432	50.2	49.2167	0.0156661
0.64324	49.29	49.2458	0.0150838
0.64328	51.78	49.2748	0.0145032
0.64332	48.62	49.3038	0.0139244
0.64336	52.21	49.3326	0.0133474
0.6434	47.18	49.3614	0.012772
0.64344	52.31	49.3901	0.0121983
0.64348	46.94	49.4187	0.0116263
0.64352	51.78	49.4472	0.0110558
0.64356	46.47	49.4757	0.0104869
0.6436	51.01	49.504	0.0099196
0.64364	46.23	49.5323	0.00935377
0.64368	51.25	49.5605	0.00878943
0.64372	46.75	49.5887	0.00822656
0.64376	50.82	49.6167	0.00766515
0.6438	46.9	49.6447	0.00710519
0.64384	51.01	49.6727	0.00654668
0.64388	47.57	49.7005	0.00598963
0.64392	51.21	49.7283	0.00543406
0.64396	47.9	49.756	0.00487997
0.644	51.44	49.7836	0.00432739
0.64404	48.67	49.8112	0.00377632
0.64408	52.07	49.8387	0.00322679
0.64412	49.34	49.8661	0.00267881
0.64416	51.73	49.8934	0.00213238
0.6442	49.91	49.9206	0.00158751
0.64424	51.3	49.9478	0.0010442
0.64428	51.01	49.9749	0.000502429
0.64432	50.1	50.0019	-3.78148e-05
0.64436	51.35	50.0288	-0.000576557
0.6444	49.29	50.0557	-0.00111383
0.64444	52.74	50.0825	-0.00164966
0.64448	48.05	50.1092	-0.00218409
0.64452	52.83	50.1359	-0.00271717
0.64456	47.42	50.1624	-0.00324894
0.6446	52.59	50.189	-0.00377945
0.64464	46.9	50.2154	-0.00430873
0.64468	52.11	50.2418	-0.00483685
0.64472	46.99	50.2682	-0.00536383
0.64476	51.78	50.2945	-0.00588971
0.6448	46.99	50.3207	-0.00641451
0.64484	51.68	50.3469	-0.00693826
0.64488	47.81	50.373	-0.00746097
0.64492	51.21	50.3991	-0.00798264
0.64496	47.95	50.4252	-0.00850327
0.645	51.78	50.4511	-0.00902286
0.64504	48.43	50.4771	-0.0095414
0.64508	52.02	50.5029	-0.0100589
0.64512	49.05	50.5288	-0.0105752
0.64516	52.5	50.5545	-0.0110905
0.6452	49.43	50.5802	-0.0116046
0.64524	52.55	50.6059	-0.0121176
0.64528	50.58	50.6315	-0.0126295
0.64532	52.07	50.657	-0.0131401
0.64536	51.25	50.6825	-0.0136497
0.6454	51.21	50.7079	-0.014158
0.64544	52.78	50.7333	-0.0146652
0.64548	49.91	50.7586	-0.0151713
0.64552	53.12	50.7838	-0.0156762
0.64556	49.1	50.809	-0.0161801
0.6456	53.41	50.8341	-0.016683
0.64564	48.24	50.8592	-0.0171848
0.64568	53.26	50.8843	-0.0176857
0.64572	47.95	50.9093	-0.0181857
0.64576	53.02	50.9342	-0.0186847
0.6458	47.62	50.9591	-0.019183
0.64584	52.64	50.984	-0.0196804
0.64588	47.57	51.0089	-0.020177
0.64592	51.97	51.0336	-0.0206729
0.64596	47.71	51.0584	-0.0211679
0.646	52.64	51.0831	-0.0216622
0.64604	48.81	51.1078	-0.0221558
0.64608	52.35	51.1324	-0.0226485
0.64612	48.91	51.157	-0.0231404
0.64616	52.88	51.1816	-0.0236315
0.6462	49.67	51.2061	-0.0241218
0.64624	53.55	51.2306	-0.0246112
0.64628	50.39	51.255	-0.0250996
0.64632	53.31	51.2794	-0.0255872
0.64636	50.49	51.3037	-0.0260738
0.6464	52.59	51.328	-0.0265595
0.64644	52.4	51.3522	-0.0270442
0.64648	52.11	51.3764	-0.027528
0.64652	52.98	51.4005	-0.0280108
0.64656	51.35	51.4246	-0.0284927
0.6466	53.69	51.4487	-0.0289737
0.64664	50.73	51.4727	-0.0294538
0.64668	54.22	51.4967	-0.0299331
0.64672	49.15	51.5206	-0.0304116
0.64676	54.46	51.5445	-0.0308894
0.6468	48.76	51.5683	-0.0313664
0.64684	53.79	51.5921	-0.0318428
0.64688	48.29	51.6159	-0.0323187
0.64692	53.07	51.6397	-0.032794
0.64696	48.33	51.6634	-0.0332688
0.647	53.17	51.6872	-0.0337431
0.64704	48.76	51.7108	-0.034217
0.64708	53.22	51.7345	-0.0346904
0.64712	48.86	51.7582	-0.0351635
0.64716	53.02	51.7818	-0.0356362
0.6472	50.1	51.8054	-0.0361084
0.64724	53.5	51.829	-0.0365803
0.64728	49.72	51.8526	-0.0370518
0.64732	53.69	51.8761	-0.0375229
0.64736	50.58	51.8997	-0.0379936
0.6474	53.69	51.9232	-0.0384638
0.64744	51.25	51.9467	-0.0389337
0.64748	54.08	51.9702	-0.0394032
0.64752	52.35	51.9936	-0.0398722
0.64756	52.64	52.017	-0.0403408
0.6476	53.26	52.0405	-0.0408091
0.64764	52.11	52.0639	-0.041277
0.64768	54.13	52.0872	-0.0417446
0.64772	50.87	52.1106	-0.042212
0.64776	54.65	52.134	-0.042679
0.6478	49.91	52.1573	-0.0431459
0.64784	54.7	52.1806	-0.0436127
0.64788	49.05	52.204	-0.0440793
0.64792	54.8	52.2273	-0.044546
0.64796	48.91	52.2506	-0.0450126
0.648	54.08	52.274	-0.0454793
0.64804	49	52.2973	-0.0459461
0.64808	53.79	52.3206	-0.046413
0.64812	49.48	52.344	-0.0468801
0.64816	53.69	52.3674	-0.0473473
0.6482	49.86	52.3907	-0.0478148
0.64824	53.55	52.4141	-0.0482825
0.64828	49.96	52.4375	-0.0487504
0.64832	53.74	52.4609	-0.0492185
0.64836	50.92	52.4843	-0.0496868
0.6484	54.17	52.5078	-0.0501553
0.64844	51.11	52.5312	-0.050624
0.64848	54.6	52.5546	-0.0510929
0.64852	51.59	52.5781	-0.051562
0.64856	54.6	52.6016	-0.0520313
0.6486	52.07	52.625	-0.0525008
0.64864	54.03	52.6485	-0.0529704
0.64868	53.74	52.672	-0.0534403
0.64872	52.88	52.6955	-0.0539103
0.64876	54.6	52.719	-0.0543806
0.6488	51.73	52.7426	-0.0548512
0.64884	55.27	52.7661	-0.0553221
0.64888	50.49	52.7897	-0.0557934
0.64892	55.47	52.8133	-0.0562651
0.64896	49.43	52.8369	-0.0567372
0.649	55.27	52.8605	-0.0572097
0.64904	49.34	52.8841	-0.0576829
0.64908	54.84	52.9078	-0.0581566
0.64912	49.67	52.9315	-0.0586309
0.64916	54.46	52.9553	-0.0591058
0.6492	50.39	52.9791	-0.0595813
0.64924	54.08	53.0029	-0.0600576
0.64928	50.77	53.0267	-0.0605345
0.64932	54.27	53.0506	-0.0610121
0.64936	50.3	53.0745	-0.0614903
0.6494	55.13	53.0985	-0.0619693
0.64944	50.25	53.1224	-0.0624489
0.64948	54.89	53.1465	-0.0629291
0.64952	51.59	53.1705	-0.06341
0.64956	55.13	53.1946	-0.0638915
0.6496	52.55	53.2187	-0.0643736
0.64964	54.84	53.2428	-0.0648562
0.64968	53.26	53.267	-0.0653395
0.64972	52.88	53.2912	-0.0658233
0.64976	54.13	53.3154	-0.0663076
0.6498	53.6	53.3396	-0.0667926
0.64984	55.51	53.3639	-0.067278
0.64988	52.55	53.3882	-0.0677641
0.64992	55.37	53.4125	-0.0682507
0.64996	51.21	53.4369	-0.0687379
0.65	55.85	53.4613	-0.0692258
0.65004	51.06	53.4857	-0.0697143
0.65008	55.56	53.5102	-0.0702034
0.65012	50.49	53.5347	-0.0706932
0.65016	55.66	53.5592	-0.0711837
0.6502	49.77	53.5837	-0.0716749
0.65024	55.66	53.6083	-0.0721668
0.65028	50.25	53.633	-0.0726595
0.65032	54.75	53.6576	-0.0731528
0.65036	50.58	53.6823	-0.0736469
0.6504	54.89	53.7071	-0.0741416
0.65044	51.73	53.7318	-0.074637
0.65048	55.23	53.7566	-0.075133
0.65052	51.68	53.7815	-0.0756295
0.65056	55.51	53.8063	-0.0761266
0.6506	52.02	53.8312	-0.0766242
0.65064	56.18	53.8561	-0.0771222
0.65068	53.12	53.881	-0.0776207
0.65072	55.61	53.906	-0.0781195
0.65076	53.36	53.9309	-0.0786187
0.6508	55.75	53.9559	-0.0791182
0.65084	54.17	53.9809	-0.0796179
0.65088	54.84	54.0059	-0.080118
0.65092	55.42	54.0309	-0.0806183
0.65096	53.65	54.0559	-0.0811188
0.651	56.33	54.081	-0.0816197
0.65104	52.35	54.106	-0.0821207
0.65108	56.81	54.1311	-0.0826221
0.65112	51.4	54.1562	-0.0831237
0.65116	56.71	54.1813	-0.0836257
0.6512	50.49	54.2064	-0.0841279
0.65124	56.42	54.2315	-0.0846305
0.65128	51.21	54.2567	-0.0851334
0.65132	56.04	54.2818	-0.0856367
0.65136	51.06	54.307	-0.0861403
0.6514	55.47	54.3322	-0.0866443
0.65144	51.54	54.3574	-0.0871485
0.65148	55.66	54.3827	-0.087653
0.65152	52.11	54.4079	-0.0881579
0.65156	55.85	54.4331	-0.0886629
0.6516	52.07	54.4584	-0.0891681
0.65164	55.94	54.4837	-0.0896735
0.65168	52.98	54.509	-0.090179
0.65172	56.61	54.5342	-0.0906846
0.65176	53.93	54.5595	-0.0911901
0.6518	56.52	54.5848	-0.0916957
0.65184	53.93	54.6101	-0.0922012
0.65188	56.14	54.6353	-0.0927065
0.65192	55.08	54.6606	-0.0932118
0.65196	55.7	54.6858	-0.0937169
0.652	56.42	54.7111	-0.0942219
0.65204	54.27	54.7363	-0.0947267
0.65208	57.09	54.7616	-0.0952313
0.65212	53.55	54.7868	-0.0957358
0.65216	57.81	54.812	-0.0962401
0.6522	52.59	54.8372	-0.0967443
0.65224	57.09	54.8624	-0.0972484
0.65228	51.68	54.8876	-0.0977524
0.65232	56.76	54.9128	-0.0982564
0.65236	51.54	54.938	-0.0987603
0.6524	56.81	54.9632	-0.0992642
0.65244	51.64	54.9884	-0.0997681
0.65248	56.09	55.0136	-0.100272
0.65252	52.02	55.0388	-0.100776
0.65256	56.61	55.064	-0.101279
0.6526	52.35	55.0892	-0.101783
0.65264	55.99	55.1143	-0.102287
0.65268	52.55	55.1395	-0.10279
0.65272	56.18	55.1647	-0.103294
0.65276	54.08	55.1898	-0.103797
0.6528	57	55.215	-0.104299
0.65284	54.13	55.2401	-0.104802
0.65288	57.81	55.2652	-0.105304
0.65292	54.03	55.2903	-0.105806
0.65296	56.95	55.3154	-0.106307
0.653	55.85	55.3404	-0.106808
0.65304	56.61	55.3654	-0.107308
0.65308	56.47	55.3904	-0.107808
0.65312	55.42	55.4154	-0.108307
0.65316	57.19	55.4403	-0.108806
0.6532	54.7	55.4652	-0.109304
0.65324	58.24	55.4901	-0.109802
0.65328	52.69	55.5149	-0.110299
0.65332	58.48	55.5398	-0.110795
0.65336	52.74	55.5646	-0.111291
0.6534	57.95	55.5893	-0.111787
0.65344	52.45	55.6141	-0.112282
0.65348	57.72	55.6388	-0.112776
0.65352	52.4	55.6635	-0.11327
0.65356	57.09	55.6882	-0.113764
0.6536	52.88	55.7128	-0.114257
0.65364	56.95	55.7375	-0.11475
0.65368	53.45	55.7621	-0.115242
0.65372	57.52	55.7867	-0.115734
0.65376	53.45	55.8112	-0.116225
0.6538	57.67	55.8358	-0.116715
0.65384	53.79	55.8603	-0.117205
0.65388	57.72	55.8847	-0.117695
0.65392	54.51	55.9092	-0.118183
0.65396	58.05	55.9336	-0.118671
0.654	55.27	55.9579	-0.119159
0.65404	57.67	55.9823	-0.119645
0.65408	55.99	56.0066	-0.120131
0.65412	57.24	56.0308	-0.120616
0.65416	56.66	56.055	-0.1211
0.6542	56.23	56.0792	-0.121584
0.65424	57.72	56.1033	-0.122066
0.65428	55.27	56.1274	-0.122548
0.65432	58.72	56.1515	-0.12303
0.65436	54.27	56.1755	-0.12351
0.6544	58.67	56.1995	-0.12399
0.65444	53.74	56.2234	-0.124469
0.65448	58.72	56.2473	-0.124947
0.65452	53.12	56.2712	-0.125425
0.65456	58.34	56.2951	-0.125902
0.6546	53.12	56.3189	-0.126378
0.65464	57.81	56.3427	-0.126854
0.65468	53.41	56.3665	-0.127329
0.65472	57.81	56.3902	-0.127804
0.65476	53.6	56.4139	-0.128278
0.6548	57.67	56.4376	-0.128751
0.65484	54.36	56.4612	-0.129224
0.65488	57.86	56.4848	-0.129697
0.65492	54.65	56.5084	-0.130168
0.65496	58.15	56.532	-0.130639
0.655	54.89	56.5555	-0.131109
0.65504	58.43	56.5789	-0.131579
0.65508	55.47	56.6024	-0.132048
0.65512	58.77	56.6258	-0.132516
0.65516	56.14	56.6491	-0.132983
0.6552	57.95	56.6725	-0.133449
0.65524	57.28	56.6957	-0.133915
0.65528	57.24	56.719	-0.13438
0.65532	58.96	56.7422	-0.134844
0.65536	55.85	56.7653	-0.135307
0.6554	59.34	56.7884	-0.135769
0.65544	54.94	56.8115	-0.13623
0.65548	59.49	56.8346	-0.136691
0.65552	54.32	56.8576	-0.137151
0.65556	59.34	56.8805	-0.137611
0.6556	53.93	56.9035	-0.138069
0.65564	59.06	56.9264	-0.138527
0.65568	53.65	56.9492	-0.138985
0.65572	58.43	56.9721	-0.139441
0.65576	54.36	56.9949	-0.139898
0.6558	58.58	57.0177	-0.140353
0.65584	53.93	57.0404	-0.140808
0.65588	58.58	57.0632	-0.141263
0.65592	54.27	57.0859	-0.141717
0.65596	58.62	57.1085	-0.14217
0.656	55.13	57.1312	-0.142623
0.65604	58.53	57.1538	-0.143075
0.65608	55.66	57.1764	-0.143527
0.65612	59.2	57.1989	-0.143978
0.65616	56.37	57.2214	-0.144428
0.6562	59.73	57.2439	-0.144878
0.65624	56.95	57.2663	-0.145327
0.65628	58.86	57.2887	-0.145775
0.65632	57	57.3111	-0.146222
0.65636	58.29	57.3334	-0.146669
0.6564	59.01	57.3557	-0.147115
0.65644	57.48	57.378	-0.14756
0.65648	59.53	57.4002	-0.148005
0.65652	55.8	57.4224	-0.148449
0.65656	59.96	57.4446	-0.148892
0.6566	55.13	57.4668	-0.149335
0.65664	60.25	57.4889	-0.149778
0.65668	54.27	57.511	-0.15022
0.65672	59.77	57.5331	-0.150661
0.65676	54.27	57.5551	-0.151102
0.6568	59.58	57.5771	-0.151543
0.65684	54.51	57.5992	-0.151983
0.65688	59.2	57.6212	-0.152423
0.65692	54.08	57.6432	-0.152863
0.65696	58.91	57.6651	-0.153303
0.657	55.13	57.6871	-0.153742
0.65704	59.1	57.7091	-0.154181
0.65708	55.66	57.731	-0.15462
0.65712	59.15	57.7529	-0.155059
0.65716	55.99	57.7749	-0.155497
0.6572	60.16	57.7968	-0.155935
0.65724	56.37	57.8186	-0.156373
0.65728	60.16	57.8405	-0.15681
0.65732	57.19	57.8624	-0.157247
0.65736	59.96	57.8842	-0.157684
0.6574	57.48	57.906	-0.158121
0.65744	58.62	57.9278	-0.158557
0.65748	59.1	57.9496	-0.158993
0.65752	58.24	57.9714	-0.159428
0.65756	59.68	57.9932	-0.159863
0.6576	56.66	58.0149	-0.160299
0.65764	60.4	58.0367	-0.160733
0.65768	56.04	58.0584	-0.161168
0.65772	60.73	58.0801	-0.161603
0.65776	54.99	58.1019	-0.162037
0.6578	60.44	58.1236	-0.162472
0.65784	54.84	58.1453	-0.162906
0.65788	59.87	58.167	-0.163341
0.65792	54.89	58.1888	-0.163776
0.65796	59.96	58.2105	-0.16421
0.658	54.99	58.2323	-0.164645
0.65804	59.06	58.254	-0.16508
0.65808	55.37	58.2758	-0.165515
0.65812	59.63	58.2975	-0.165951
0.65816	55.85	58.3193	-0.166386
0.6582	59.92	58.3411	-0.166822
0.65824	56.18	58.3629	-0.167257
0.65828	60.11	58.3846	-0.167693
0.65832	56.47	58.4064	-0.168129
0.65836	60.11	58.4282	-0.168564
0.6584	57.52	58.45	-0.169
0.65844	60.25	58.4718	-0.169436
0.65848	57.91	58.4936	-0.169871
0.65852	60.16	58.5153	-0.170307
0.65856	59.44	58.5371	-0.170742
0.6586	59.01	58.5589	-0.171178
0.65864	60.4	58.5806	-0.171613
0.65868	57.91	58.6024	-0.172048
0.65872	61.07	58.6241	-0.172483
0.65876	56.42	58.6459	-0.172918
0.6588	61.07	58.6676	-0.173353
0.65884	55.8	58.6894	-0.173788
0.65888	61.54	58.7111	-0.174222
0.65892	55.42	58.7329	-0.174657
0.65896	60.97	58.7546	-0.175092
0.659	55.18	58.7764	-0.175527
0.65904	60.35	58.7981	-0.175962
0.65908	55.32	58.8199	-0.176397
0.65912	60.4	58.8416	-0.176832
0.65916	55.85	58.8634	-0.177268
0.6592	59.82	58.8851	-0.177703
0.65924	56.23	58.9069	-0.178138
0.65928	60.49	58.9287	-0.178573
0.65932	56.81	58.9504	-0.179009
0.65936	60.92	58.9722	-0.179444
0.6594	56.81	58.9939	-0.179879
0.65944	61.02	59.0157	-0.180314
0.65948	57.19	59.0374	-0.180748
0.65952	61.02	59.0591	-0.181183
0.65956	58.19	59.0808	-0.181617
0.6596	60.59	59.1025	-0.18205
0.65964	59.87	59.1242	-0.182484
0.65968	59.73	59.1458	-0.182917
0.65972	60.73	59.1675	-0.183349
0.65976	59.34	59.1891	-0.183781
0.6598	61.31	59.2106	-0.184213
0.65984	57.86	59.2322	-0.184644
0.65988	61.83	59.2537	-0.185074
0.65992	57.04	59.2752	-0.185505
0.65996	61.88	59.2967	-0.185934
0.66	56.42	59.3182	-0.186364
0.66004	61.78	59.3396	-0.186792
0.66008	55.75	59.361	-0.187221
0.66012	60.78	59.3824	-0.187649
0.66016	55.66	59.4038	-0.188076
0.6602	61.31	59.4252	-0.188504
0.66024	57	59.4465	-0.18893
0.66028	60.87	59.4678	-0.189357
0.66032	57	59.4891	-0.189783
0.66036	61.07	59.5104	-0.190208
0.6604	57.52	59.5316	-0.190633
0.66044	61.02	59.5528	-0.191057
0.66048	58.19	59.574	-0.191481
0.66052	61.26	59.5952	-0.191903
0.66056	58.48	59.6163	-0.192326
0.6606	61.07	59.6374	-0.192747
0.66064	59.1	59.6584	-0.193168
0.66068	61.83	59.6794	-0.193588
0.66072	59.77	59.7003	-0.194007
0.66076	61.02	59.7213	-0.194425
0.6608	60.68	59.7421	-0.194843
0.66084	59.77	59.763	-0.195259
0.66088	61.93	59.7837	-0.195675
0.66092	58.53	59.8045	-0.19609
0.66096	62.31	59.8252	-0.196503
0.661	57.48	59.8458	-0.196917
0.66104	62.36	59.8664	-0.197329
0.66108	56.71	59.887	-0.19774
0.66112	62.45	59.9076	-0.198151
0.66116	56.9	59.928	-0.198561
0.6612	62.02	59.9485	-0.19897
0.66124	56.81	59.9689	-0.199379
0.66128	61.59	59.9893	-0.199786
0.66132	57	60.0097	-0.200193
0.66136	60.97	60.03	-0.2006
0.6614	57.33	60.0503	-0.201005
0.66144	61.21	60.0705	-0.20141
0.66148	57.95	60.0907	-0.201814
0.66152	61.35	60.1108	-0.202217
0.66156	58.34	60.131	-0.202619
0.6616	61.98	60.151	-0.20302
0.66164	58.82	60.171	-0.203421
0.66168	62.55	60.191	-0.20382
0.66172	59.39	60.2109	-0.204219
0.66176	62.21	60.2308	-0.204616
0.6618	60.2	60.2506	-0.205012
0.66184	61.5	60.2704	-0.205408
0.66188	61.02	60.2901	-0.205802
0.66192	60.83	60.3097	-0.206195
0.66196	61.88	60.3293	-0.206587
0.662	59.58	60.3489	-0.206978
0.66204	62.88	60.3684	-0.207368
0.66208	58.62	60.3878	-0.207756
0.66212	63.27	60.4072	-0.208144
0.66216	57.95	60.4265	-0.208531
0.6622	63.22	60.4458	-0.208916
0.66224	57.28	60.465	-0.209301
0.66228	62.79	60.4842	-0.209685
0.66232	57.43	60.5034	-0.210068
0.66236	62.21	60.5225	-0.21045
0.6624	57.33	60.5415	-0.210831
0.66244	61.69	60.5606	-0.211211
0.66248	57.62	60.5795	-0.211591
0.66252	62.21	60.5985	-0.211969
0.66256	58.15	60.6174	-0.212347
0.6626	61.93	60.6362	-0.212724
0.66264	58.58	60.655	-0.2131
0.66268	62.36	60.6738	-0.213475
0.66272	59.2	60.6925	-0.21385
0.66276	62.98	60.7112	-0.214223
0.6628	60.06	60.7298	-0.214596
0.66284	62.5	60.7484	-0.214967
0.66288	60.3	60.7669	-0.215338
0.66292	62.74	60.7854	-0.215707
0.66296	61.16	60.8038	-0.216076
0.663	62.69	60.8222	-0.216443
0.66304	62.02	60.8405	-0.21681
0.66308	60.73	60.8588	-0.217175
0.66312	63.46	60.877	-0.21754
0.66316	59.34	60.8952	-0.217904
0.6632	63.65	60.9134	-0.218267
0.66324	58.58	60.9315	-0.21863
0.66328	63.55	60.9496	-0.218991
0.66332	58.1	60.9676	-0.219352
0.66336	63.08	60.9856	-0.219713
0.6634	58	61.0036	-0.220073
0.66344	62.93	61.0216	-0.220432
0.66348	57.76	61.0396	-0.220791
0.66352	62.12	61.0575	-0.22115
0.66356	57.95	61.0754	-0.221508
0.6636	62.17	61.0933	-0.221866
0.66364	58.34	61.1112	-0.222224
0.66368	62.02	61.1291	-0.222581
0.66372	58.72	61.1469	-0.222938
0.66376	62.69	61.1648	-0.223295
0.6638	58.91	61.1826	-0.223652
0.66384	63.17	61.2004	-0.224008
0.66388	60.06	61.2182	-0.224364
0.66392	63.27	61.236	-0.224719
0.66396	60.49	61.2537	-0.225075
0.664	63.32	61.2715	-0.22543
0.66404	61.31	61.2892	-0.225784
0.66408	62.6	61.3069	-0.226139
0.66412	62.55	61.3246	-0.226493
0.66416	61.5	61.3423	-0.226846
0.6642	63.46	61.36	-0.2272
0.66424	60.44	61.3777	-0.227553
0.66428	63.46	61.3953	-0.227906
0.66432	59.77	61.4129	-0.228259
0.66436	64.13	61.4306	-0.228612
0.6644	58.96	61.4482	-0.228965
0.66444	63.89	61.4659	-0.229318
0.66448	58.19	61.4835	-0.229671
0.66452	63.51	61.5012	-0.230024
0.66456	58.34	61.5188	-0.230377
0.6646	63.55	61.5365	-0.23073
0.66464	58.15	61.5542	-0.231084
0.66468	62.88	61.5719	-0.231439
0.66472	58.48	61.5897	-0.231793
0.66476	62.74	61.6074	-0.232148
0.6648	59.44	61.6252	-0.232503
0.66484	62.79	61.6429	-0.232859
0.66488	59.82	61.6608	-0.233215
0.66492	62.93	61.6786	-0.233572
0.66496	60.25	61.6964	-0.233928
0.665	63.75	61.7143	-0.234286
0.66504	60.44	61.7322	-0.234643
0.66508	63.84	61.7501	-0.235002
0.66512	61.07	61.768	-0.23536
0.66516	63.65	61.7859	-0.235719
0.6652	61.93	61.8039	-0.236078
0.66524	62.69	61.8219	-0.236438
0.66528	62.79	61.8399	-0.236798
0.66532	61.64	61.8579	-0.237159
0.66536	63.75	61.876	-0.23752
0.6654	60.44	61.8941	-0.237882
0.66544	64.75	61.9122	-0.238245
0.66548	59.34	61.9304	-0.238608
0.66552	64.18	61.9486	-0.238971
0.66556	59.25	61.9668	-0.239336
0.6656	63.89	61.9851	-0.239701
0.66564	58.62	62.0034	-0.240068
0.66568	63.7	62.0217	-0.240435
0.66572	58.77	62.0401	-0.240803
0.66576	63.32	62.0586	-0.241172
0.6658	58.96	62.0771	-0.241542
0.66584	63.27	62.0956	-0.241913
0.66588	59.77	62.1142	-0.242285
0.66592	63.27	62.1329	-0.242658
0.66596	59.82	62.1516	-0.243032
0.666	63.36	62.1704	-0.243407
0.66604	60.35	62.1892	-0.243783
0.66608	63.99	62.208	-0.24416
0.66612	60.49	62.2269	-0.244538
0.66616	64.03	62.2458	-0.244917
0.6662	60.92	62.2648	-0.245296
0.66624	63.94	62.2839	-0.245677
0.66628	62.02	62.3029	-0.246058
0.66632	64.13	62.322	-0.246441
0.66636	63.08	62.3412	-0.246824
0.6664	62.93	62.3604	-0.247208
0.66644	63.32	62.3796	-0.247593
0.66648	61.69	62.3989	-0.247979
0.66652	64.32	62.4183	-0.248365
0.66656	61.07	62.4376	-0.248753
0.6666	65.09	62.4571	-0.249141
0.66664	59.73	62.4765	-0.249531
0.66668	64.56	62.4961	-0.249921
0.66672	59.15	62.5156	-0.250313
0.66676	64.9	62.5353	-0.250705
0.6668	59.1	62.5549	-0.251099
0.66684	64.37	62.5747	-0.251493
0.66688	59.68	62.5945	-0.251889
0.66692	63.75	62.6143	-0.252286
0.66696	59.77	62.6342	-0.252684
0.667	64.13	62.6541	-0.253083
0.66704	60.11	62.6741	-0.253483
0.66708	64.08	62.6942	-0.253884
0.66712	60.4	62.7143	-0.254286
0.66716	64.03	62.7345	-0.254689
0.6672	61.4	62.7547	-0.255093
0.66724	64.7	62.7749	-0.255498
0.66728	60.97	62.7952	-0.255904
0.66732	64.66	62.8155	-0.256311
0.66736	62.17	62.8359	-0.256718
0.6674	64.9	62.8563	-0.257126
0.66744	63.03	62.8768	-0.257536
0.66748	63.65	62.8973	-0.257945
0.66752	64.13	62.9178	-0.258356
0.66756	62.55	62.9384	-0.258767
0.6676	64.99	62.959	-0.259179
0.66764	61.64	62.9796	-0.259592
0.66768	65.57	63.0003	-0.260006
0.66772	60.87	63.021	-0.26042
0.66776	65.33	63.0418	-0.260835
0.6678	60.3	63.0626	-0.261251
0.66784	65.57	63.0834	-0.261668
0.66788	59.63	63.1043	-0.262085
0.66792	64.99	63.1252	-0.262504
0.66796	59.68	63.1461	-0.262923
0.668	64.51	63.1672	-0.263343
0.66804	60.2	63.1882	-0.263764
0.66808	64.51	63.2093	-0.264186
0.66812	60.49	63.2304	-0.264608
0.66816	64.03	63.2516	-0.265032
0.6682	61.07	63.2728	-0.265456
0.66824	64.46	63.294	-0.26588
0.66828	61.31	63.3153	-0.266306
0.66832	64.8	63.3366	-0.266732
0.66836	61.93	63.3579	-0.267159
0.6684	65.37	63.3793	-0.267586
0.66844	61.74	63.4007	-0.268013
0.66848	65.33	63.4221	-0.268441
0.66852	63.41	63.4435	-0.26887
0.66856	64.9	63.4649	-0.269298
0.6686	63.99	63.4864	-0.269727
0.66864	64.18	63.5078	-0.270157
0.66868	65.04	63.5293	-0.270586
0.66872	62.74	63.5508	-0.271016
0.66876	66.14	63.5723	-0.271446
0.6688	61.69	63.5938	-0.271876
0.66884	66.14	63.6153	-0.272306
0.66888	60.87	63.6368	-0.272736
0.66892	66.47	63.6583	-0.273167
0.66896	61.11	63.6799	-0.273598
0.669	65.47	63.7014	-0.274028
0.66904	60.25	63.723	-0.27446
0.66908	65.66	63.7445	-0.274891
0.66912	60.78	63.7661	-0.275322
0.66916	64.94	63.7877	-0.275754
0.6692	60.54	63.8093	-0.276186
0.66924	65.09	63.8309	-0.276617
0.66928	60.92	63.8525	-0.277049
0.66932	65.09	63.874	-0.277481
0.66936	61.54	63.8956	-0.277913
0.6694	65.52	63.9172	-0.278344
0.66944	61.69	63.9388	-0.278776
0.66948	65.95	63.9604	-0.279207
0.66952	63.12	63.9819	-0.279638
0.66956	66.52	64.0034	-0.280069
0.6696	63.7	64.0249	-0.280499
0.66964	65.37	64.0464	-0.280928
0.66968	64.37	64.0679	-0.281358
0.66972	64.94	64.0893	-0.281786
0.66976	65.95	64.1107	-0.282214
0.6698	63.79	64.1321	-0.282641
0.66984	66.38	64.1534	-0.283068
0.66988	63.22	64.1747	-0.283494
0.66992	66.24	64.196	-0.283919
0.66996	62.74	64.2172	-0.284344
0.67	67.1	64.2384	-0.284768
0.67004	61.78	64.2596	-0.285191
0.67008	66.33	64.2807	-0.285614
0.67012	61.26	64.3018	-0.286036
0.67016	66.76	64.3229	-0.286457
0.6702	61.16	64.3439	-0.286878
0.67024	65.95	64.3649	-0.287298
0.67028	61.45	64.3859	-0.287717
0.67032	65.61	64.4068	-0.288136
0.67036	62.17	64.4277	-0.288554
0.6704	65.66	64.4486	-0.288971
0.67044	62.17	64.4694	-0.289388
0.67048	66.24	64.4902	-0.289804
0.67052	62.55	64.5109	-0.290219
0.67056	66.14	64.5316	-0.290633
0.6706	63.36	64.5523	-0.291046
0.67064	66.43	64.5729	-0.291458
0.67068	63.51	64.5935	-0.29187
0.67072	66.57	64.614	-0.29228
0.67076	64.94	64.6345	-0.29269
0.6708	66.09	64.6549	-0.293098
0.67084	65.76	64.6753	-0.293506
0.67088	65.09	64.6956	-0.293912
0.67092	67.1	64.7159	-0.294318
0.67096	64.08	64.7361	-0.294722
0.671	67.38	64.7563	-0.295125
0.67104	62.74	64.7764	-0.295528
0.67108	67.77	64.7965	-0.295929
0.67112	61.88	64.8165	-0.29633
0.67116	67.05	64.8365	-0.296729
0.6712	61.59	64.8564	-0.297128
0.67124	67.05	64.8763	-0.297526
0.67128	61.69	64.8961	-0.297923
0.67132	66.43	64.916	-0.298319
0.67136	61.98	64.9357	-0.298715
0.6714	66.28	64.9555	-0.29911
0.67144	62.21	64.9752	-0.299504
0.67148	66.28	64.9949	-0.299897
0.67152	62.5	65.0145	-0.30029
0.67156	66.33	65.0341	-0.300682
0.6716	63.36	65.0537	-0.301073
0.67164	66.81	65.0732	-0.301464
0.67168	63.65	65.0927	-0.301853
0.67172	67.19	65.1121	-0.302242
0.67176	64.32	65.1315	-0.30263
0.6718	66.86	65.1509	-0.303017
0.67184	64.85	65.1702	-0.303403
0.67188	66.91	65.1894	-0.303789
0.67192	65.9	65.2087	-0.304173
0.67196	65.61	65.2278	-0.304557
0.672	66.67	65.247	-0.304939
0.67204	64.99	65.2661	-0.305321
0.67208	67.53	65.2851	-0.305702
0.67212	63.84	65.3041	-0.306083
0.67216	67.77	65.3231	-0.306462
0.6722	62.84	65.3421	-0.306841
0.67224	67.91	65.361	-0.30722
0.67228	62.5	65.3799	-0.307597
0.67232	67.62	65.3987	-0.307974
0.67236	61.93	65.4175	-0.308351
0.6724	67.29	65.4363	-0.308727
0.67244	62.36	65.4551	-0.309103
0.67248	67.19	65.4739	-0.309478
0.67252	62.88	65.4926	-0.309852
0.67256	66.57	65.5113	-0.310227
0.6726	63.36	65.53	-0.310601
0.67264	66.86	65.5487	-0.310974
0.67268	63.22	65.5674	-0.311347
0.67272	67.24	65.586	-0.31172
0.67276	64.08	65.6046	-0.312093
0.6728	67.67	65.6232	-0.312465
0.67284	64.08	65.6418	-0.312836
0.67288	68.1	65.6604	-0.313208
0.67292	65.37	65.6789	-0.313578
0.67296	66.86	65.6974	-0.313949
0.673	65.9	65.7159	-0.314319
0.67304	66.43	65.7344	-0.314688
0.67308	66.91	65.7529	-0.315058
0.67312	65.47	65.7713	-0.315426
0.67316	67.05	65.7898	-0.315795
0.6732	64.03	65.8082	-0.316163
0.67324	68.29	65.8266	-0.316531
0.67328	63.12	65.845	-0.316899
0.67332	68.1	65.8634	-0.317267
0.67336	63.12	65.8817	-0.317635
0.6734	68.25	65.9001	-0.318002
0.67344	62.5	65.9185	-0.31837
0.67348	67.62	65.9368	-0.318737
0.67352	63.12	65.9552	-0.319104
0.67356	67.72	65.9736	-0.319472
0.6736	62.98	65.9919	-0.319839
0.67364	67.24	66.0103	-0.320206
0.67368	63.12	66.0287	-0.320574
0.67372	67.38	66.0471	-0.320941
0.67376	63.89	66.0654	-0.321308
0.6738	67.48	66.0838	-0.321676
0.67384	64.13	66.1021	-0.322043
0.67388	67.82	66.1205	-0.32241
0.67392	64.85	66.1389	-0.322777
0.67396	67.82	66.1572	-0.323144
0.674	65.57	66.1756	-0.323511
0.67404	68.15	66.1939	-0.323878
0.67408	66.28	66.2122	-0.324244
0.67412	67.48	66.2305	-0.324611
0.67416	66.91	66.2488	-0.324977
0.6742	66.62	66.2671	-0.325343
0.67424	68.82	66.2854	-0.325708
0.67428	65.33	66.3037	-0.326074
0.67432	68.44	66.322	-0.32644
0.67436	63.94	66.3402	-0.326805
0.6744	69.11	66.3585	-0.32717
0.67444	63.7	66.3768	-0.327536
0.67448	68.72	66.395	-0.327901
0.67452	63.08	66.4133	-0.328266
0.67456	68.25	66.4316	-0.328631
0.6746	63.08	66.4498	-0.328997
0.67464	68.1	66.4681	-0.329362
0.67468	63.7	66.4864	-0.329728
0.67472	67.43	66.5047	-0.330094
0.67476	63.7	66.523	-0.33046
0.6748	67.67	66.5413	-0.330826
0.67484	64.13	66.5596	-0.331192
0.67488	67.91	66.5779	-0.331558
0.67492	64.61	66.5962	-0.331925
0.67496	68.1	66.6146	-0.332291
0.675	64.7	66.6329	-0.332657
0.67504	68.87	66.6512	-0.333024
0.67508	65.47	66.6695	-0.33339
0.67512	68.96	66.6878	-0.333756
0.67516	66.09	66.7061	-0.334122
0.6752	67.77	66.7244	-0.334488
0.67524	67.43	66.7427	-0.334854
0.67528	67.19	66.761	-0.33522
0.67532	68.77	66.7793	-0.335586
0.67536	65.95	66.7975	-0.335951
0.6754	68.96	66.8158	-0.336316
0.67544	65.09	66.8341	-0.336681
0.67548	69.39	66.8523	-0.337046
0.67552	64.23	66.8706	-0.337411
0.67556	69.68	66.8888	-0.337776
0.6756	63.6	66.907	-0.338141
0.67564	69.01	66.9253	-0.338505
0.67568	63.55	66.9435	-0.33887
0.67572	68.53	66.9617	-0.339235
0.67576	63.6	66.98	-0.339599
0.6758	68.2	66.9982	-0.339964
0.67584	64.18	67.0164	-0.340328
0.67588	68.49	67.0347	-0.340693
0.67592	64.51	67.0529	-0.341058
0.67596	68.15	67.0711	-0.341422
0.676	64.56	67.0893	-0.341786
0.67604	68.72	67.1075	-0.34215
0.67608	65.57	67.1257	-0.342514
0.67612	68.92	67.1439	-0.342878
0.67616	65.8	67.1621	-0.343241
0.6762	69.11	67.1802	-0.343604
0.67624	66.67	67.1983	-0.343967
0.67628	68.92	67.2164	-0.344329
0.67632	67.91	67.2345	-0.34469
0.67636	67.72	67.2526	-0.345052
0.6764	68.2	67.2706	-0.345412
0.67644	66.86	67.2886	-0.345772
0.67648	69.35	67.3066	-0.346132
0.67652	65.9	67.3246	-0.346491
0.67656	69.68	67.3425	-0.34685
0.6766	64.75	67.3604	-0.347208
0.67664	69.97	67.3782	-0.347565
0.67668	63.99	67.3961	-0.347922
0.67672	69.92	67.4139	-0.348278
0.67676	64.75	67.4317	-0.348634
0.6768	69.54	67.4495	-0.348989
0.67684	64.37	67.4672	-0.349344
0.67688	68.58	67.4849	-0.349698
0.67692	64.61	67.5026	-0.350052
0.67696	68.77	67.5202	-0.350404
0.677	65.23	67.5378	-0.350757
0.67704	68.58	67.5554	-0.351108
0.67708	64.9	67.573	-0.351459
0.67712	69.25	67.5905	-0.351809
0.67716	66.09	67.6079	-0.352159
0.6772	69.44	67.6253	-0.352507
0.67724	66.91	67.6427	-0.352854
0.67728	69.54	67.66	-0.353201
0.67732	67.53	67.6773	-0.353546
0.67736	69.59	67.6945	-0.353891
0.6774	67.96	67.7117	-0.354234
0.67744	68.82	67.7288	-0.354576
0.67748	68.77	67.7459	-0.354917
0.67752	67.48	67.7629	-0.355257
0.67756	69.68	67.7798	-0.355596
0.6776	66.28	67.7967	-0.355934
0.67764	70.21	67.8135	-0.35627
0.67768	65.42	67.8303	-0.356606
0.67772	70.11	67.847	-0.35694
0.67776	65.42	67.8636	-0.357273
0.6778	69.97	67.8802	-0.357605
0.67784	64.99	67.8968	-0.357935
0.67788	69.78	67.9132	-0.358265
0.67792	64.7	67.9297	-0.358593
0.67796	69.49	67.946	-0.358921
0.678	64.9	67.9623	-0.359247
0.67804	69.3	67.9786	-0.359572
0.67808	65.28	67.9948	-0.359896
0.67812	69.39	68.0109	-0.360219
0.67816	65.85	68.027	-0.36054
0.6782	70.21	68.043	-0.36086
0.67824	66.09	68.0589	-0.361179
0.67828	69.92	68.0748	-0.361496
0.67832	66.76	68.0906	-0.361812
0.67836	69.97	68.1063	-0.362126
0.6784	67	68.122	-0.362439
0.67844	70.69	68.1375	-0.362751
0.67848	67.62	68.153	-0.36306
0.67852	69.54	68.1684	-0.363369
0.67856	69.16	68.1838	-0.363675
0.6786	68.63	68.199	-0.36398
0.67864	70.26	68.2142	-0.364283
0.67868	67.19	68.2293	-0.364585
0.67872	70.88	68.2443	-0.364885
0.67876	65.95	68.2592	-0.365184
0.6788	70.88	68.274	-0.36548
0.67884	65.61	68.2888	-0.365776
0.67888	70.97	68.3035	-0.366069
0.67892	65.09	68.3181	-0.366361
0.67896	69.97	68.3326	-0.366652
0.679	64.99	68.347	-0.366941
0.67904	70.3	68.3614	-0.367228
0.67908	65.47	68.3757	-0.367514
0.67912	69.59	68.3899	-0.367799
0.67916	65.52	68.4041	-0.368082
0.6792	69.01	68.4182	-0.368363
0.67924	66.19	68.4322	-0.368643
0.67928	70.26	68.4461	-0.368921
0.67932	66.95	68.4599	-0.369198
0.67936	70.11	68.4736	-0.369473
0.6794	66.86	68.4873	-0.369746
0.67944	70.93	68.5009	-0.370018
0.67948	67.82	68.5144	-0.370287
0.67952	71.17	68.5278	-0.370555
0.67956	67.91	68.5411	-0.370821
0.6796	70.64	68.5543	-0.371085
0.67964	69.2	68.5674	-0.371348
0.67968	69.54	68.5804	-0.371608
0.67972	69.73	68.5934	-0.371867
0.67976	68.49	68.6062	-0.372124
0.6798	71.88	68.619	-0.372379
0.67984	67	68.6316	-0.372632
0.67988	71.21	68.6442	-0.372884
[truncated: 23,003 more rows]

## Sheet: Sheet2
0.78344	52.45	49.9928	0.000143353	3.06889e-05
0.78348	50.77	49.964	0.000719636	0.000136549
0.78352	50.82	49.9352	0.00129584	0.000241632
0.78356	51.25	49.9064	0.00187197	0.000345917
0.7836	50.06	49.8776	0.00244802	0.000449384
0.78364	52.02	49.8488	0.00302399	0.000552015
0.78368	47.9	49.82	0.00359985	0.000653792
0.78372	52.11	49.7912	0.00417558	0.000754694
0.78376	48.05	49.7624	0.00475115	0.0008547
0.7838	52.83	49.7337	0.00532655	0.000953784
0.78384	46.85	49.7049	0.00590174	0.00105192
0.78388	52.07	49.6762	0.00647668	0.00114907
0.78392	46.27	49.6474	0.00705134	0.00124523
0.78396	51.64	49.6187	0.0076257	0.00134036
0.784	46.61	49.59	0.00819973	0.00143443
0.78404	51.06	49.5613	0.00877339	0.00152742
0.78408	46.23	49.5327	0.00934669	0.0016193
0.78412	50.3	49.504	0.00991961	0.00171006
0.78416	46.23	49.4754	0.0104921	0.00179966
0.7842	50.49	49.4468	0.0110643	0.00188809
0.78424	47.14	49.4182	0.0116361	0.00197533
0.78428	51.11	49.3896	0.0122076	0.00206136
0.78432	47.52	49.3611	0.0127788	0.00214615
0.78436	51.06	49.3325	0.0133497	0.00222969
0.7844	47.81	49.304	0.0139203	0.00231196
0.78444	51.16	49.2755	0.0144908	0.00239295
0.78448	48.29	49.2469	0.015061	0.00247263
0.78452	50.73	49.2184	0.0156311	0.00255098
0.78456	49.15	49.1899	0.0162011	0.00262798
0.7846	50.34	49.1615	0.0167709	0.00270363
0.78464	50.2	49.133	0.0173407	0.0027779
0.78468	49.29	49.1045	0.0179103	0.00285078
0.78472	51.4	49.076	0.0184798	0.00292228
0.78476	48.67	49.0475	0.0190493	0.00299238
0.7848	51.64	49.0191	0.0196186	0.00306109
0.78484	46.66	48.9906	0.0201878	0.00312842
0.78488	51.54	48.9622	0.0207568	0.00319438
0.78492	45.94	48.9337	0.0213256	0.00325899
0.78496	51.21	48.9053	0.0218941	0.00332225
0.785	45.65	48.8769	0.0224624	0.0033842
0.78504	50.63	48.8485	0.0230305	0.00344485
0.78508	45.8	48.8201	0.0235982	0.00350424
0.78512	50.63	48.7917	0.0241656	0.0035624
0.78516	45.75	48.7634	0.0247326	0.00361936
0.7852	49.72	48.735	0.0252994	0.00367519
0.78524	45.84	48.7067	0.0258658	0.00372992
0.78528	49.77	48.6784	0.0264318	0.00378362
0.78532	46.42	48.6501	0.0269976	0.00383633
0.78536	50.77	48.6218	0.0275631	0.00388811
0.7854	46.37	48.5936	0.0281283	0.00393902
0.78544	50.2	48.5653	0.0286933	0.00398912
0.78548	48	48.5371	0.029258	0.00403845
0.78552	50.3	48.5089	0.0298226	0.00408707
0.78556	47.81	48.4806	0.030387	0.00413502
0.7856	50.1	48.4524	0.0309513	0.00418236
0.78564	48	48.4242	0.0315154	0.00422913
0.78568	50.3	48.396	0.0320794	0.00427539
0.78572	49.05	48.3678	0.0326433	0.00432118
0.78576	48.76	48.3396	0.0332071	0.00436654
0.7858	49.58	48.3115	0.0337706	0.00441153
0.78584	47.57	48.2833	0.0343341	0.00445618
0.78588	50.2	48.2551	0.0348973	0.00450054
0.78592	46.13	48.227	0.0354603	0.00454466
0.78596	51.78	48.1988	0.0360231	0.00458857
0.786	44.84	48.1707	0.0365855	0.0046323
0.78604	49.72	48.1426	0.0371477	0.00467588
0.78608	44.5	48.1145	0.0377095	0.00471936
0.78612	50.2	48.0864	0.038271	0.00476276
0.78616	45.37	48.0584	0.0388321	0.00480611
0.7862	49.53	48.0304	0.0393928	0.00484943
0.78624	45.13	48.0023	0.039953	0.00489276
0.78628	49.39	47.9744	0.0405129	0.00493612
0.78632	44.84	47.9464	0.0410723	0.00497953
0.78636	48.96	47.9184	0.0416314	0.00502301
0.7864	45.56	47.8905	0.04219	0.00506658
0.78644	49.15	47.8626	0.0427483	0.00511024
0.78648	45.17	47.8347	0.0433062	0.00515401
0.78652	49.39	47.8068	0.0438638	0.00519789
0.78656	46.56	47.7789	0.0444212	0.0052419
0.7866	50.15	47.7511	0.0449783	0.00528603
0.78664	46.08	47.7232	0.0455352	0.00533028
0.78668	50.1	47.6954	0.0460919	0.00537466
0.78672	47.33	47.6676	0.0466484	0.00541917
0.78676	48.96	47.6398	0.0472049	0.00546381
0.7868	47.66	47.6119	0.0477612	0.00550858
0.78684	48.52	47.5841	0.0483174	0.0055535
0.78688	48.81	47.5563	0.0488735	0.00559855
0.78692	47.14	47.5285	0.0494295	0.00564374
0.78696	49.82	47.5007	0.0499855	0.00568906
0.787	45.94	47.4729	0.0505413	0.00573451
0.78704	50.54	47.4452	0.0510969	0.00578009
0.78708	44.41	47.4174	0.0516525	0.00582578
0.78712	49.39	47.3896	0.0522078	0.00587156
0.78716	44.6	47.3619	0.052763	0.00591743
0.7872	49.91	47.3341	0.0533179	0.00596336
0.78724	43.79	47.3064	0.0538726	0.00600932
0.78728	49.63	47.2786	0.054427	0.0060553
0.78732	43.31	47.2509	0.0549812	0.00610127
0.78736	48.76	47.2232	0.0555351	0.00614719
0.7874	43.93	47.1956	0.0560887	0.00619304
0.78744	49	47.1679	0.0566421	0.00623878
0.78748	44.5	47.1402	0.0571953	0.00628437
0.78752	48.76	47.1126	0.0577482	0.00632977
0.78756	44.5	47.085	0.0583009	0.00637493
0.7876	48.33	47.0573	0.0588535	0.00641981
0.78764	45.75	47.0297	0.0594059	0.00646434
0.78768	49.29	47.0021	0.0599583	0.00650847
0.78772	44.93	46.9745	0.0605105	0.00655214
0.78776	49.19	46.9469	0.0610628	0.0065953
0.7878	46.23	46.9192	0.061615	0.00663789
0.78784	48.43	46.8916	0.0621673	0.00667987
0.78788	47.47	46.864	0.0627196	0.00672117
0.78792	48.09	46.8364	0.0632719	0.00676177
0.78796	48.14	46.8088	0.0638244	0.00680162
0.788	46.9	46.7812	0.0643769	0.00684068
0.78804	49.39	46.7535	0.0649295	0.00687891
0.78808	45.08	46.7259	0.0654821	0.00691628
0.78812	49	46.6983	0.0660347	0.00695275
0.78816	44.6	46.6706	0.0665874	0.00698829
0.7882	48.91	46.643	0.06714	0.00702286
0.78824	43.35	46.6154	0.0676925	0.00705643
0.78828	48.81	46.5878	0.0682449	0.00708898
0.78832	43.16	46.5601	0.0687973	0.00712046
0.78836	48.76	46.5325	0.0693494	0.00715087
0.7884	42.92	46.5049	0.0699015	0.00718018
0.78844	47.81	46.4773	0.0704533	0.00720839
0.78848	44.17	46.4497	0.071005	0.00723547
0.78852	47.23	46.4222	0.0715566	0.00726142
0.78856	43.69	46.3946	0.072108	0.00728623
0.7886	47.33	46.367	0.0726592	0.0073099
0.78864	43.69	46.3395	0.0732103	0.00733241
0.78868	47.85	46.3119	0.0737614	0.00735375
0.78872	43.93	46.2844	0.0743123	0.00737391
0.78876	48.29	46.2568	0.0748633	0.00739288
0.7888	44.41	46.2293	0.0754143	0.00741064
0.78884	48.48	46.2017	0.0759653	0.00742717
0.78888	45.13	46.1742	0.0765165	0.00744246
0.78892	48.24	46.1466	0.0770678	0.00745649
0.78896	46.37	46.119	0.0776192	0.00746924
0.789	47.42	46.0915	0.0781709	0.00748071
0.78904	46.99	46.0639	0.0787227	0.00749087
0.78908	46.13	46.0363	0.0792748	0.00749972
0.78912	48.67	46.0086	0.0798271	0.00750726
0.78916	44.93	45.981	0.0803796	0.00751347
0.7892	48.76	45.9534	0.0809324	0.00751833
0.78924	44.46	45.9257	0.0814853	0.00752184
0.78928	48.52	45.8981	0.0820383	0.00752398
0.78932	43.16	45.8704	0.0825915	0.00752475
0.78936	48.14	45.8428	0.0831448	0.00752412
0.7894	42.64	45.8151	0.0836982	0.00752209
0.78944	48.19	45.7874	0.0842516	0.00751865
0.78948	42.01	45.7598	0.084805	0.00751379
0.78952	46.99	45.7321	0.0853584	0.00750752
0.78956	42.88	45.7044	0.0859117	0.00749983
0.7896	47.28	45.6767	0.0864651	0.00749073
0.78964	42.83	45.6491	0.0870184	0.0074802
0.78968	46.13	45.6214	0.0875716	0.00746825
0.78972	43.07	45.5938	0.0881249	0.00745488
0.78976	46.66	45.5661	0.0886781	0.0074401
0.7898	43.69	45.5384	0.0892314	0.00742389
0.78984	46.99	45.5108	0.0897847	0.00740626
0.78988	43.16	45.4831	0.0903382	0.00738723
0.78992	47.38	45.4554	0.0908917	0.0073668
0.78996	44.74	45.4277	0.0914454	0.00734498
0.79	46.75	45.4	0.0919993	0.00732178
0.79004	45.03	45.3723	0.0925535	0.00729721
0.79008	46.8	45.3446	0.0931079	0.0072713
0.79012	45.65	45.3169	0.0936626	0.00724407
0.79016	45.99	45.2891	0.0942176	0.00721553
0.7902	46.37	45.2614	0.0947729	0.00718573
0.79024	44.84	45.2336	0.0953285	0.00715468
0.79028	47.09	45.2058	0.0958845	0.00712244
0.79032	43.55	45.178	0.0964408	0.00708903
0.79036	48.09	45.1501	0.0969974	0.00705449
0.7904	42.68	45.1223	0.0975544	0.00701886
0.79044	48.05	45.0944	0.0981117	0.00698217
0.79048	41.49	45.0665	0.0986692	0.00694446
0.79052	46.99	45.0386	0.099227	0.00690577
0.79056	41.92	45.0107	0.0997851	0.00686612
0.7906	46.71	44.9828	0.100344	0.00682555
0.79064	42.25	44.9549	0.100902	0.00678409
0.79068	46.27	44.9269	0.101461	0.00674178
0.79072	41.78	44.899	0.10202	0.00669865
0.79076	46.23	44.871	0.10258	0.00665474
0.7908	42.64	44.843	0.10314	0.00661009
0.79084	46.71	44.815	0.1037	0.00656473
0.79088	42.25	44.787	0.10426	0.0065187
0.79092	45.89	44.7589	0.104822	0.00647203
0.79096	42.78	44.7308	0.105383	0.00642477
0.791	46.85	44.7027	0.105945	0.00637696
0.79104	43.69	44.6746	0.106508	0.00632864
0.79108	46.75	44.6465	0.107071	0.00627983
0.79112	44.07	44.6183	0.107634	0.00623059
0.79116	46.23	44.5901	0.108199	0.00618093
0.7912	45.37	44.5618	0.108764	0.0061309
0.79124	45.27	44.5335	0.10933	0.00608054
0.79128	45.84	44.5052	0.109896	0.00602988
0.79132	43.88	44.4768	0.110464	0.00597896
0.79136	46.47	44.4484	0.111032	0.00592782
0.7914	43.21	44.42	0.1116	0.00587649
0.79144	47.33	44.3915	0.11217	0.00582502
0.79148	42.16	44.363	0.11274	0.00577345
0.79152	47.28	44.3345	0.11331	0.00572182
0.79156	41.54	44.3059	0.113882	0.00567017
0.7916	46.61	44.2773	0.114454	0.00561854
0.79164	40.82	44.2487	0.115026	0.00556697
0.79168	46.18	44.22	0.115599	0.0055155
0.79172	40.82	44.1914	0.116173	0.00546417
0.79176	46.13	44.1626	0.116747	0.00541301
0.7918	41.3	44.1339	0.117322	0.00536208
0.79184	45.56	44.1051	0.117897	0.00531139
0.79188	41.2	44.0764	0.118473	0.005261
0.79192	45.32	44.0475	0.119049	0.00521094
0.79196	42.16	44.0187	0.119626	0.00516126
0.792	45.27	43.9898	0.120204	0.00511199
0.79204	41.73	43.9609	0.120782	0.00506319
0.79208	45.75	43.932	0.121361	0.00501491
0.79212	42.45	43.903	0.12194	0.00496718
0.79216	45.89	43.874	0.12252	0.00492006
0.7922	42.97	43.845	0.123101	0.00487359
0.79224	46.18	43.8159	0.123682	0.00482783
0.79228	43.79	43.7868	0.124265	0.00478282
0.79232	44.89	43.7576	0.124848	0.00473859
0.79236	44.36	43.7284	0.125431	0.0046952
0.7924	43.83	43.6992	0.126016	0.00465267
0.79244	44.84	43.6699	0.126601	0.00461107
0.79248	42.54	43.6406	0.127187	0.00457041
0.79252	45.7	43.6113	0.127774	0.00453075
0.79256	41.3	43.5819	0.128362	0.00449213
0.7926	46.08	43.5525	0.12895	0.00445457
0.79264	40.44	43.5231	0.129539	0.00441812
0.79268	46.51	43.4936	0.130128	0.00438281
0.79272	40.05	43.4641	0.130718	0.00434868
0.79276	45.46	43.4345	0.131309	0.00431575
0.7928	40.15	43.405	0.1319	0.00428407
0.79284	44.46	43.3754	0.132492	0.00425365
0.79288	40.15	43.3457	0.133085	0.00422453
0.79292	44.22	43.3161	0.133678	0.00419672
0.79296	40.29	43.2864	0.134272	0.00417026
0.793	44.7	43.2567	0.134867	0.00414517
0.79304	40.72	43.2269	0.135462	0.00412147
0.79308	44.84	43.1971	0.136058	0.00409918
0.79312	41.39	43.1673	0.136654	0.00407833
0.79316	44.55	43.1374	0.137252	0.00405894
0.7932	42.3	43.1075	0.13785	0.00404104
0.79324	45.56	43.0775	0.138449	0.00402465
0.79328	42.59	43.0475	0.13905	0.0040098
0.79332	45.37	43.0175	0.139651	0.00399652
0.79336	42.78	42.9874	0.140253	0.00398483
0.7934	44.17	42.9572	0.140856	0.00397476
0.79344	43.45	42.927	0.14146	0.00396634
0.79348	43.5	42.8967	0.142066	0.00395959
0.79352	44.31	42.8664	0.142672	0.00395456
0.79356	42.83	42.836	0.143279	0.00395126
0.7936	45.22	42.8056	0.143888	0.00394973
0.79364	41.15	42.7752	0.144497	0.00395
0.79368	45.56	42.7446	0.145107	0.00395211
0.79372	40.05	42.7141	0.145718	0.00395608
0.79376	45.6	42.6835	0.14633	0.00396196
0.7938	39.91	42.6528	0.146943	0.00396976
0.79384	44.7	42.6221	0.147557	0.00397953
0.79388	39.19	42.5914	0.148172	0.00399129
0.79392	44.6	42.5606	0.148787	0.00400507
0.79396	39.48	42.5298	0.149403	0.00402091
0.794	43.83	42.499	0.15002	0.00403884
0.79404	40.39	42.4681	0.150638	0.00405888
0.79408	43.4	42.4372	0.151256	0.00408107
0.79412	39.76	42.4063	0.151875	0.00410544
0.79416	43.45	42.3753	0.152495	0.00413202
0.7942	40.2	42.3443	0.153115	0.00416086
0.79424	43.93	42.3132	0.153736	0.00419199
0.79428	40.53	42.2821	0.154358	0.00422545
0.79432	44.26	42.251	0.15498	0.00426129
0.79436	40.58	42.2198	0.155603	0.00429954
0.7944	44.17	42.1886	0.156227	0.00434027
0.79444	41.63	42.1574	0.156852	0.00438351
0.79448	44.22	42.1261	0.157477	0.00442932
0.79452	42.59	42.0948	0.158104	0.00447776
0.79456	42.54	42.0635	0.158731	0.00452887
0.7946	43.12	42.0321	0.159359	0.00458272
0.79464	41.73	42.0006	0.159987	0.00463938
0.79468	44.17	41.9692	0.160616	0.0046989
0.79472	40.63	41.9377	0.161246	0.00476134
0.79476	44.6	41.9061	0.161877	0.00482677
0.7948	39.48	41.8746	0.162508	0.00489526
0.79484	44.22	41.843	0.16314	0.00496687
0.79488	39.05	41.8114	0.163773	0.00504166
0.79492	44.22	41.7797	0.164406	0.00511972
0.79496	38.62	41.7481	0.165039	0.00520109
0.795	43.45	41.7164	0.165673	0.00528586
0.79504	38.23	41.6847	0.166307	0.0053741
0.79508	42.92	41.6529	0.166941	0.00546587
0.79512	38.81	41.6212	0.167576	0.00556126
0.79516	43.02	41.5894	0.168212	0.00566032
0.7952	38.86	41.5576	0.168847	0.00576315
0.79524	42.83	41.5258	0.169483	0.00586983
0.79528	39.29	41.494	0.170119	0.00598042
0.79532	43.16	41.4622	0.170756	0.00609501
0.79536	39.62	41.4304	0.171393	0.00621368
0.7954	43.31	41.3985	0.17203	0.00633652
0.79544	40.1	41.3666	0.172668	0.00646361
0.79548	43.21	41.3347	0.173306	0.00659504
0.79552	40.77	41.3028	0.173944	0.00673088
0.79556	42.92	41.2708	0.174583	0.00687123
0.7956	41.54	41.2389	0.175222	0.00701618
0.79564	42.01	41.2069	0.175862	0.00716582
0.79568	42.21	41.1749	0.176502	0.00732024
0.79572	41.01	41.1429	0.177143	0.00747952
0.79576	43.12	41.1108	0.177783	0.00764378
0.7958	40.05	41.0788	0.178424	0.00781308
0.79584	43.45	41.0467	0.179066	0.00798754
0.79588	39.09	41.0146	0.179707	0.00816722
0.79592	43.79	40.9825	0.180349	0.00835224
0.79596	37.61	40.9504	0.180991	0.00854266
0.796	43.12	40.9183	0.181633	0.00873859
0.79604	37.32	40.8862	0.182275	0.00894012
0.79608	43.02	40.8541	0.182917	0.00914732
0.79612	37.32	40.822	0.18356	0.0093603
0.79616	42.3	40.7899	0.184202	0.00957914
0.7962	37.37	40.7578	0.184844	0.00980392
0.79624	41.82	40.7257	0.185486	0.0100347
0.79628	37.8	40.6936	0.186128	0.0102717
0.79632	41.92	40.6615	0.18677	0.0105148
0.79636	38.52	40.6294	0.187412	0.0107642
0.7964	41.87	40.5973	0.188053	0.01102
0.79644	38.62	40.5652	0.188695	0.0112823
0.79648	42.49	40.5332	0.189337	0.011551
0.79652	39.53	40.5011	0.189979	0.0118264
0.79656	42.64	40.469	0.190621	0.0121085
0.7966	39.62	40.4369	0.191263	0.0123973
0.79664	42.25	40.4048	0.191905	0.012693
0.79668	39.86	40.3727	0.192547	0.0129955
0.79672	41.68	40.3405	0.193189	0.0133051
0.79676	41.3	40.3084	0.193831	0.0136217
0.7968	40	40.2763	0.194474	0.0139454
0.79684	42.21	40.2442	0.195116	0.0142764
0.79688	38.95	40.2121	0.195759	0.0146146
0.79692	42.78	40.1799	0.196401	0.0149602
0.79696	38.47	40.1478	0.197044	0.0153132
0.797	42.4	40.1157	0.197686	0.0156736
0.79704	37.32	40.0836	0.198329	0.0160415
0.79708	42.54	40.0514	0.198971	0.016417
0.79712	36.41	40.0193	0.199613	0.0168001
0.79716	41.78	39.9872	0.200256	0.0171909
0.7972	37.08	39.9551	0.200897	0.0175894
0.79724	41.54	39.923	0.201539	0.0179957
0.79728	36.56	39.891	0.202181	0.0184098
0.79732	41.25	39.8589	0.202822	0.0188317
0.79736	36.7	39.8269	0.203463	0.0192614
0.7974	41.63	39.7948	0.204103	0.019699
0.79744	37.37	39.7628	0.204744	0.0201446
0.79748	41.11	39.7308	0.205384	0.020598
0.79752	37.95	39.6988	0.206024	0.0210594
0.79756	41.34	39.6668	0.206664	0.0215287
0.7976	38.04	39.6348	0.207304	0.0220059
0.79764	41.3	39.6028	0.207944	0.022491
0.79768	38.38	39.5708	0.208584	0.0229839
0.79772	41.63	39.5388	0.209223	0.0234847
0.79776	39.14	39.5069	0.209863	0.0239932
0.7978	41.3	39.4749	0.210502	0.0245094
0.79784	39.81	39.4429	0.211142	0.0250331
0.79788	39.57	39.4109	0.211781	0.0255644
0.79792	41.2	39.379	0.21242	0.0261031
0.79796	38.86	39.347	0.21306	0.0266491
0.798	41.3	39.315	0.213699	0.0272022
0.79804	37.42	39.2831	0.214338	0.0277623
0.79808	41.87	39.2511	0.214977	0.0283293
0.79812	36.65	39.2192	0.215616	0.0289029
0.79816	41.73	39.1873	0.216255	0.0294831
0.7982	36.03	39.1553	0.216893	0.0300697
0.79824	41.54	39.1234	0.217532	0.0306624
0.79828	35.7	39.0915	0.21817	0.031261
0.79832	40.53	39.0596	0.218807	0.0318654
0.79836	35.65	39.0278	0.219445	0.0324753
0.7984	40.05	38.9959	0.220082	0.0330905
0.79844	36.37	38.9641	0.220719	0.0337107
0.79848	39.86	38.9322	0.221355	0.0343357
0.79852	36.65	38.9004	0.221992	0.0349653
0.79856	40.29	38.8686	0.222628	0.0355991
0.7986	36.7	38.8368	0.223263	0.036237
0.79864	40.77	38.8051	0.223899	0.0368785
0.79868	37.42	38.7733	0.224534	0.0375235
0.79872	40.39	38.7415	0.225169	0.0381715
0.79876	37.47	38.7098	0.225804	0.0388224
0.7988	41.01	38.678	0.226439	0.0394758
0.79884	38.42	38.6463	0.227074	0.0401313
0.79888	40.1	38.6146	0.227709	0.0407886
0.79892	39.19	38.5828	0.228343	0.0414473
0.79896	39.24	38.5511	0.228978	0.0421071
0.799	40	38.5194	0.229613	0.0427677
0.79904	37.52	38.4876	0.230247	0.0434285
0.79908	40.77	38.4559	0.230881	0.0440892
0.79912	37.32	38.4242	0.231516	0.0447493
0.79916	40.91	38.3925	0.23215	0.0454085
0.7992	35.65	38.3608	0.232784	0.0460661
0.79924	40.91	38.3291	0.233417	0.0467217
0.79928	35.36	38.2975	0.234051	0.0473749
0.79932	40.48	38.2658	0.234684	0.048025
0.79936	35.03	38.2342	0.235317	0.0486716
0.7994	39.62	38.2025	0.235949	0.049314
0.79944	34.98	38.1709	0.236581	0.0499516
0.79948	39.19	38.1393	0.237213	0.0505839
0.79952	34.55	38.1078	0.237845	0.0512102
0.79956	39.43	38.0762	0.238476	0.05183
0.7996	35.46	38.0447	0.239106	0.0524424
0.79964	39.48	38.0132	0.239737	0.0530468
0.79968	36.17	37.9817	0.240367	0.0536426
0.79972	39.72	37.9502	0.240997	0.0542289
0.79976	36.27	37.9187	0.241626	0.0548051
0.7998	39.48	37.8872	0.242255	0.0553703
0.79984	36.61	37.8558	0.242884	0.0559238
0.79988	39.96	37.8243	0.243513	0.0564648
0.79992	36.94	37.7929	0.244142	0.0569924
0.79996	39.86	37.7615	0.244771	0.0575057
0.8	37.9	37.73	0.245399	0.0580038
0.80004	38.47	37.6986	0.246027	0.058486
0.80008	38.9	37.6672	0.246656	0.0589511
0.80012	36.75	37.6358	0.247284	0.0593984
0.80016	40.05	37.6044	0.247912	0.0598267
0.8002	35.94	37.573	0.24854	0.0602351
0.80024	40.05	37.5416	0.249168	0.0606225
0.80028	35.22	37.5102	0.249795	0.060988
0.80032	40.39	37.4789	0.250423	0.0613305
0.80036	34.5	37.4475	0.25105	0.0616489
0.8004	39.19	37.4162	0.251677	0.0619423
0.80044	33.69	37.3848	0.252303	0.06221
0.80048	39.14	37.3535	0.25293	0.0624513
0.80052	33.88	37.3222	0.253556	0.0626657
0.80056	38.76	37.2909	0.254182	0.0628531
0.8006	34.83	37.2596	0.254807	0.0630134
0.80064	38.38	37.2284	0.255433	0.063147
0.80068	34.93	37.1971	0.256058	0.0632543
0.80072	38.42	37.1659	0.256682	0.0633358
0.80076	35.22	37.1347	0.257307	0.0633925
0.8008	39.05	37.1034	0.257931	0.0634251
0.80084	35.36	37.0722	0.258555	0.0634347
0.80088	39.05	37.041	0.259179	0.0634224
0.80092	35.84	37.0098	0.259803	0.0633891
0.80096	39.05	36.9786	0.260427	0.063336
0.801	36.17	36.9474	0.261051	0.0632642
0.80104	38.52	36.9163	0.261675	0.0631747
0.80108	37.04	36.8851	0.262299	0.0630687
0.80112	37.23	36.8539	0.262922	0.0629471
0.80116	38.23	36.8227	0.263546	0.062811
0.8012	36.7	36.7915	0.26417	0.0626614
0.80124	38.76	36.7603	0.264794	0.0624993
0.80128	35.6	36.7291	0.265417	0.0623255
0.80132	39.67	36.698	0.266041	0.0621411
0.80136	34.36	36.6668	0.266664	0.0619468
0.8014	39.57	36.6356	0.267288	0.0617435
0.80144	33.54	36.6044	0.267911	0.0615322
0.80148	38.52	36.5733	0.268534	0.0613136
0.80152	33.35	36.5421	0.269157	0.0610885
0.80156	38.47	36.511	0.26978	0.0608579
0.8016	33.35	36.4799	0.270402	0.0606225
0.80164	38.09	36.4488	0.271024	0.0603831
0.80168	33.59	36.4177	0.271646	0.0601405
0.80172	37.9	36.3866	0.272268	0.0598953
0.80176	33.49	36.3556	0.272889	0.0596482
0.8018	36.89	36.3245	0.27351	0.0593999
0.80184	34.16	36.2935	0.274131	0.059151
0.80188	37.85	36.2624	0.274751	0.058902
0.80192	34.69	36.2314	0.275371	0.0586536
0.80196	37.75	36.2004	0.275992	0.0584062
0.802	34.79	36.1694	0.276611	0.0581603
0.80204	37.8	36.1384	0.277231	0.0579165
0.80208	35.31	36.1075	0.277851	0.0576752
0.80212	38.19	36.0765	0.27847	0.0574369
0.80216	36.17	36.0455	0.27909	0.057202
0.8022	36.89	36.0145	0.279709	0.056971
0.80224	36.99	35.9836	0.280328	0.0567443
0.80228	35.94	35.9526	0.280948	0.0565223
0.80232	38.42	35.9217	0.281567	0.0563053
0.80236	34.4	35.8907	0.282186	0.0560936
0.8024	38.19	35.8598	0.282805	0.0558877
0.80244	33.64	35.8288	0.283423	0.0556877
0.80248	38.71	35.7979	0.284042	0.055494
0.80252	32.87	35.767	0.28466	0.055307
0.80256	38.04	35.7361	0.285278	0.0551268
0.8026	32.58	35.7052	0.285896	0.0549538
0.80264	37.66	35.6743	0.286514	0.0547883
0.80268	32.2	35.6434	0.287131	0.0546304
0.80272	36.94	35.6126	0.287748	0.0544806
0.80276	33.21	35.5818	0.288365	0.0543389
0.8028	36.65	35.5509	0.288981	0.0542056
0.80284	32.92	35.5202	0.289597	0.0540809
0.80288	36.65	35.4894	0.290213	0.053965
0.80292	33.73	35.4586	0.290828	0.0538581
0.80296	37.32	35.4279	0.291443	0.0537602
0.803	33.35	35.3971	0.292057	0.0536715
0.80304	37.23	35.3664	0.292672	0.0535922
0.80308	34.21	35.3357	0.293286	0.0535223
0.80312	37.75	35.305	0.2939	0.0534619
0.80316	34.36	35.2743	0.294513	0.053411
0.8032	37.08	35.2437	0.295127	0.0533698
0.80324	35.31	35.213	0.29574	0.0533383
0.80328	35.79	35.1823	0.296353	0.0533165
0.80332	36.46	35.1517	0.296966	0.0533043
0.80336	34.74	35.1211	0.297578	0.0533019
0.8034	36.8	35.0905	0.298191	0.0533091
0.80344	34.02	35.0599	0.298803	0.0533259
0.80348	36.94	35.0293	0.299414	0.0533523
0.80352	33.45	34.9987	0.300025	0.053388
0.80356	37.23	34.9682	0.300636	0.0534331
0.8036	31.91	34.9377	0.301247	0.0534874
0.80364	36.8	34.9072	0.301857	0.0535507
0.80368	31.29	34.8767	0.302466	0.0536228
0.80372	37.28	34.8462	0.303075	0.0537037
0.80376	31.29	34.8158	0.303684	0.053793
0.8038	36.13	34.7854	0.304292	0.0538906
0.80384	31.58	34.7551	0.304899	0.0539963
0.80388	35.7	34.7247	0.305506	0.0541098
0.80392	31.77	34.6944	0.306112	0.0542307
0.80396	35.94	34.6641	0.306718	0.0543589
0.804	32.25	34.6339	0.307323	0.054494
0.80404	36.03	34.6036	0.307927	0.0546357
0.80408	32.54	34.5734	0.308531	0.0547836
0.80412	36.32	34.5432	0.309135	0.0549375
0.80416	33.11	34.5131	0.309739	0.055097
0.8042	36.27	34.4829	0.310342	0.0552618
0.80424	33.3	34.4528	0.310944	0.0554314
0.80428	36.61	34.4227	0.311547	0.0556056
0.80432	34.16	34.3926	0.312149	0.055784
0.80436	36.22	34.3625	0.312751	0.0559661
0.8044	34.93	34.3324	0.313352	0.0561515
0.80444	34.88	34.3023	0.313954	0.0563399
0.80448	35.84	34.2723	0.314555	0.0565307
0.80452	33.4	34.2422	0.315156	0.0567235
0.80456	36.89	34.2122	0.315756	0.0569178
0.8046	32.25	34.1822	0.316357	0.0571132
0.80464	36.99	34.1521	0.316957	0.0573093
0.80468	31.77	34.1221	0.317557	0.0575055
0.80472	36.41	34.0922	0.318157	0.0577016
0.80476	30.67	34.0622	0.318756	0.0578972
0.8048	35.94	34.0323	0.319355	0.058092
0.80484	30.77	34.0023	0.319953	0.0582858
0.80488	35.55	33.9724	0.320551	0.0584784
0.80492	30.67	33.9426	0.321149	0.0586695
0.80496	35.07	33.9127	0.321746	0.058859
0.805	31.05	33.8829	0.322343	0.0590467
0.80504	35.03	33.853	0.322939	0.0592325
0.80508	30.96	33.8232	0.323535	0.0594161
0.80512	35.31	33.7935	0.324131	0.0595977
0.80516	31.77	33.7637	0.324726	0.0597769
0.8052	35.27	33.734	0.325321	0.0599538
0.80524	31.91	33.7042	0.325915	0.0601282
0.80528	35.74	33.6745	0.32651	0.0603003
0.80532	32.44	33.6448	0.327104	0.0604698
0.80536	35.6	33.6151	0.327698	0.0606369
0.8054	33.21	33.5854	0.328292	0.0608016
0.80544	34.83	33.5557	0.328886	0.060964
0.80548	34.02	33.526	0.32948	0.0611243
0.80552	34.26	33.4963	0.330073	0.0612827
0.80556	35.17	33.4667	0.330667	0.0614393
0.8056	33.06	33.437	0.331261	0.0615946
0.80564	35.41	33.4073	0.331854	0.0617488
0.80568	32.11	33.3776	0.332448	0.0619023
0.80572	35.65	33.3479	0.333041	0.0620553
0.80576	30.96	33.3183	0.333634	0.0622083
0.8058	35.74	33.2886	0.334228	0.0623617
0.80584	30.05	33.259	0.334821	0.0625156
0.80588	35.31	33.2293	0.335414	0.0626704
0.80592	30.34	33.1997	0.336007	0.0628264
0.80596	34.74	33.17	0.336599	0.0629838
0.806	30.14	33.1404	0.337192	0.0631428
0.80604	34.21	33.1108	0.337784	0.0633037
0.80608	30.43	33.0812	0.338376	0.0634666
0.80612	33.97	33.0516	0.338968	0.0636317
0.80616	30.24	33.022	0.33956	0.0637992
0.8062	34.4	32.9924	0.340152	0.0639693
0.80624	30.91	32.9628	0.340744	0.0641422
0.80628	34.4	32.9332	0.341335	0.0643179
0.80632	31.53	32.9037	0.341927	0.0644966
0.80636	34.64	32.8741	0.342519	0.0646785
0.8064	31.63	32.8445	0.34311	0.0648635
0.80644	35.12	32.8149	0.343702	0.0650518
0.80648	32.06	32.7853	0.344294	0.0652433
0.80652	34.79	32.7557	0.344886	0.065438
0.80656	32.68	32.7261	0.345479	0.065636
0.8066	33.93	32.6964	0.346071	0.0658373
0.80664	33.78	32.6668	0.346664	0.0660418
0.80668	32.39	32.6371	0.347257	0.0662497
0.80672	34.98	32.6075	0.347851	0.066461
0.80676	31.1	32.5778	0.348444	0.0666758
0.8068	35.27	32.5481	0.349038	0.0668942
0.80684	30	32.5184	0.349632	0.0671161
0.80688	36.03	32.4887	0.350226	0.0673416
0.80692	29.62	32.459	0.35082	0.0675706
0.80696	34.93	32.4293	0.351414	0.0678033
0.807	29.57	32.3996	0.352009	0.0680393
0.80704	34.26	32.3698	0.352603	0.0682788
0.80708	29.62	32.3401	0.353198	0.0685215
0.80712	33.78	32.3104	0.353792	0.0687674
0.80716	29.52	32.2807	0.354386	0.0690162
0.8072	33.35	32.251	0.354981	0.0692678
0.80724	29.66	32.2212	0.355575	0.0695222
0.80728	33.21	32.1915	0.35617	0.069779
0.80732	29.86	32.1618	0.356764	0.0700381
0.80736	33.69	32.1321	0.357358	0.0702994
0.8074	30.34	32.1024	0.357953	0.0705627
0.80744	33.88	32.0727	0.358547	0.0708276
0.80748	30.91	32.0429	0.359141	0.0710939
0.80752	34.12	32.0132	0.359736	0.0713613
0.80756	31.2	31.9835	0.36033	0.0716293
0.8076	33.54	31.9538	0.360925	0.0718978
0.80764	31.53	31.924	0.36152	0.0721662
0.80768	33.3	31.8943	0.362114	0.0724342
0.80772	33.11	31.8645	0.362709	0.0727015
0.80776	31.44	31.8348	0.363304	0.0729676
0.8078	33.69	31.8051	0.363899	0.0732321
0.80784	30.86	31.7753	0.364494	0.0734949
0.80788	33.93	31.7456	0.365089	0.0737555
0.80792	29.43	31.7158	0.365684	0.0740138
0.80796	33.88	31.6861	0.366278	0.0742696
0.808	28.8	31.6563	0.366873	0.074523
0.80804	34.45	31.6266	0.367468	0.0747738
0.80808	28.13	31.5969	0.368062	0.0750221
0.80812	33.59	31.5672	0.368656	0.0752681
0.80816	28.47	31.5375	0.36925	0.0755118
0.8082	32.58	31.5078	0.369844	0.0757534
0.80824	28.47	31.4781	0.370437	0.075993
0.80828	32.73	31.4485	0.371031	0.0762308
0.80832	28.85	31.4188	0.371623	0.076467
0.80836	32.2	31.3892	0.372216	0.0767017
0.8084	28.99	31.3596	0.372809	0.0769351
0.80844	32.78	31.33	0.373401	0.0771675
0.80848	29.28	31.3004	0.373993	0.077399
0.80852	33.3	31.2708	0.374584	0.0776298
0.80856	29.76	31.2412	0.375176	0.0778602
0.8086	33.54	31.2116	0.375768	0.0780903
0.80864	29.71	31.1821	0.376359	0.0783203
0.80868	32.97	31.1525	0.37695	0.0785507
0.80872	31.48	31.1229	0.377541	0.0787816
0.80876	32.35	31.0934	0.378133	0.0790133
0.8088	31.82	31.0638	0.378724	0.0792462
0.80884	31.2	31.0343	0.379315	0.0794805
0.80888	32.87	31.0047	0.379906	0.0797166
0.80892	30.05	30.9752	0.380497	0.0799548
0.80896	33.06	30.9456	0.381088	0.0801954
0.809	28.56	30.9161	0.381679	0.0804385
0.80904	33.3	30.8865	0.382269	0.0806843
0.80908	27.99	30.857	0.38286	0.080933
0.80912	32.82	30.8275	0.38345	0.0811847
0.80916	28.18	30.798	0.38404	0.0814394
0.8092	32.01	30.7685	0.38463	0.0816971
0.80924	27.65	30.739	0.38522	0.0819578
0.80928	32.39	30.7095	0.385809	0.0822216
0.80932	26.94	30.6801	0.386398	0.0824884
0.80936	32.11	30.6506	0.386987	0.0827583
0.8094	27.89	30.6212	0.387576	0.0830312
0.80944	31.34	30.5918	0.388164	0.083307
0.80948	28.28	30.5624	0.388753	0.0835858
0.80952	32.58	30.533	0.389341	0.0838675
0.80956	28.32	30.5035	0.389929	0.0841519
0.8096	32.2	30.4741	0.390517	0.084439
0.80964	29.62	30.4447	0.391105	0.0847284
0.80968	32.82	30.4153	0.391693	0.0850201
0.80972	29.43	30.3859	0.392281	0.0853137
0.80976	32.44	30.3565	0.392869	0.085609
0.8098	29.09	30.3271	0.393457	0.0859056
0.80984	31.53	30.2977	0.394046	0.0862033
0.80988	31.68	30.2683	0.394634	0.0865018
0.80992	30.48	30.2389	0.395223	0.0868008
0.80996	31.96	30.2094	0.395812	0.0871002
0.81	29.19	30.18	0.396401	0.0873998
0.81004	31.77	30.1505	0.39699	0.0876995
0.81008	28.99	30.121	0.397579	0.0879992
0.81012	32.73	30.0916	0.398168	0.088299
0.81016	27.85	30.0621	0.398758	0.0885989
0.8102	32.06	30.0326	0.399347	0.088899
0.81024	26.84	30.0032	0.399937	0.0891994
0.81028	31.87	29.9737	0.400527	0.0895
0.81032	26.65	29.9442	0.401116	0.0898011
0.81036	31.58	29.9147	0.401706	0.0901026
0.8104	26.98	29.8852	0.402295	0.0904046
0.81044	30.81	29.8557	0.402885	0.090707
0.81048	27.08	29.8263	0.403475	0.0910098
0.81052	30.48	29.7968	0.404065	0.091313
0.81056	27.65	29.7673	0.404654	0.0916162
0.8106	31.1	29.7378	0.405244	0.0919196
0.81064	27.37	29.7083	0.405834	0.0922229
0.81068	31.44	29.6788	0.406425	0.0925259
0.81072	28.71	29.6493	0.407015	0.0928287
0.81076	31.58	29.6197	0.407606	0.0931311
0.8108	29.19	29.5902	0.408197	0.093433
0.81084	31.68	29.5606	0.408788	0.0937344
0.81088	29.23	29.531	0.409379	0.0940353
0.81092	31.1	29.5014	0.409971	0.0943357
0.81096	29.71	29.4718	0.410564	0.0946358
0.811	30.48	29.4422	0.411156	0.0949356
0.81104	31.29	29.4125	0.411749	0.0952354
0.81108	28.85	29.3829	0.412343	0.0955352
0.81112	31.53	29.3532	0.412937	0.0958352
0.81116	27.89	29.3235	0.413531	0.0961356
0.8112	32.87	29.2937	0.414125	0.0964364
0.81124	26.75	29.264	0.41472	0.0967378
0.81128	31.29	29.2342	0.415315	0.0970396
0.81132	26.41	29.2045	0.41591	0.097342
0.81136	31.1	29.1747	0.416506	0.0976448
0.8114	26.27	29.1449	0.417101	0.0979479
0.81144	30.81	29.1152	0.417697	0.0982511
0.81148	25.79	29.0854	0.418292	0.0985543
0.81152	30.48	29.0556	0.418888	0.0988572
0.81156	25.88	29.0258	0.419484	0.0991597
0.8116	30.34	28.996	0.42008	0.0994615
0.81164	26.31	28.9662	0.420675	0.0997623
0.81168	30.29	28.9364	0.421271	0.100062
0.81172	26.89	28.9066	0.421867	0.10036
0.81176	30.19	28.8769	0.422463	0.100657
0.8118	27.22	28.8471	0.423059	0.100951
0.81184	30.86	28.8172	0.423655	0.101244
0.81188	27.85	28.7874	0.424251	0.101533
0.81192	31.01	28.7576	0.424847	0.101819
0.81196	27.85	28.7278	0.425444	0.102102
0.812	29.95	28.698	0.426041	0.10238
0.81204	29.33	28.6681	0.426637	0.102655
0.81208	29.33	28.6383	0.427234	0.102925
0.81212	29.81	28.6084	0.427831	0.103191
0.81216	28.13	28.5786	0.428428	0.103453
0.8122	30.43	28.5487	0.429026	0.103709
0.81224	27.22	28.5189	0.429623	0.103961
0.81228	31.15	28.489	0.43022	0.104208
0.81232	25.84	28.4591	0.430818	0.104451
0.81236	30.72	28.4292	0.431415	0.104687
0.8124	25.69	28.3994	0.432012	0.104919
0.81244	30.96	28.3695	0.43261	0.105145
0.81248	24.5	28.3397	0.433207	0.105365
0.81252	30.34	28.3098	0.433804	0.105579
0.81256	24.78	28.28	0.434401	0.105786
0.8126	29.66	28.2501	0.434997	0.105987
0.81264	25.74	28.2203	0.435594	0.106182
0.81268	28.66	28.1905	0.43619	0.106369
0.81272	25.21	28.1607	0.436786	0.106548
0.81276	28.99	28.1309	0.437382	0.10672
0.8128	25.88	28.1011	0.437978	0.106885
0.81284	30.1	28.0713	0.438574	0.107041
0.81288	26.94	28.0415	0.439169	0.107189
0.81292	30.19	28.0118	0.439765	0.107329
0.81296	26.7	27.982	0.44036	0.107461
0.813	29.81	27.9522	0.440956	0.107585
0.81304	27.51	27.9225	0.441551	0.107702
0.81308	29.28	27.8927	0.442146	0.10781
0.81312	28.18	27.8629	0.442742	0.107912
0.81316	28.42	27.8331	0.443337	0.108007
0.8132	29.14	27.8034	0.443933	0.108096
0.81324	27.51	27.7736	0.444528	0.108178
0.81328	29.33	27.7438	0.445124	0.108255
0.81332	25.98	27.714	0.445719	0.108326
0.81336	30.67	27.6843	0.446315	0.108392
0.8134	24.4	27.6545	0.44691	0.108453
0.81344	30.05	27.6247	0.447506	0.108509
0.81348	24.83	27.5949	0.448101	0.10856
0.81352	30.14	27.5652	0.448696	0.108607
0.81356	24.45	27.5354	0.449291	0.108648
0.8136	29.38	27.5057	0.449886	0.108686
0.81364	24.16	27.4759	0.450481	0.108718
0.81368	28.95	27.4462	0.451076	0.108746
0.81372	24.73	27.4165	0.45167	0.108769
0.81376	28.66	27.3868	0.452265	0.108787
0.8138	25.07	27.3571	0.452859	0.108801
0.81384	28.71	27.3274	0.453453	0.108811
0.81388	25.12	27.2977	0.454047	0.108816
0.81392	29.33	27.268	0.45464	0.108817
0.81396	25.5	27.2383	0.455234	0.108815
0.814	28.9	27.2086	0.455828	0.108809
0.81404	25.84	27.1789	0.456422	0.1088
0.81408	29.19	27.1492	0.457015	0.108788
0.81412	26.41	27.1195	0.457609	0.108774
0.81416	29.09	27.0899	0.458203	0.108757
0.8142	27.27	27.0602	0.458797	0.108738
0.81424	28.04	27.0305	0.45939	0.108717
0.81428	28.13	27.0008	0.459984	0.108695
0.81432	27.22	26.9711	0.460578	0.108671
0.81436	29.19	26.9414	0.461172	0.108645
0.8144	25.31	26.9117	0.461766	0.108618
0.81444	29.81	26.882	0.46236	0.108589
0.81448	24.45	26.8523	0.462954	0.108558
0.81452	29.23	26.8226	0.463548	0.108526
0.81456	23.73	26.7929	0.464141	0.108493
0.8146	29.14	26.7633	0.464735	0.108457
0.81464	23.92	26.7336	0.465328	0.108421
0.81468	28.42	26.704	0.465921	0.108383
0.81472	23.63	26.6743	0.466514	0.108343
0.81476	27.75	26.6447	0.467106	0.108303
0.8148	23.73	26.6151	0.467698	0.108261
0.81484	27.42	26.5855	0.46829	0.108219
0.81488	24.02	26.5559	0.468881	0.108176
0.81492	27.8	26.5264	0.469472	0.108134
0.81496	24.21	26.4968	0.470063	0.108091
0.815	27.85	26.4673	0.470654	0.108049
0.81504	24.5	26.4378	0.471244	0.108008
0.81508	28.23	26.4083	0.471834	0.107968
0.81512	24.69	26.3788	0.472424	0.10793
0.81516	28.42	26.3493	0.473013	0.107893
0.8152	25.64	26.3199	0.473602	0.107858
0.81524	28.18	26.2904	0.474191	0.107825
0.81528	26.46	26.261	0.47478	0.107794
0.81532	27.27	26.2315	0.475369	0.107766
0.81536	27.13	26.2021	0.475958	0.10774
0.8154	26.36	26.1727	0.476546	0.107716
0.81544	28.04	26.1433	0.477134	0.107694
0.81548	25.26	26.1139	0.477722	0.107676
0.81552	28.52	26.0845	0.47831	0.107659
0.81556	24.06	26.0551	0.478898	0.107645
0.8156	28.76	26.0257	0.479485	0.107634
0.81564	23.35	25.9964	0.480072	0.107626
0.81568	28.8	25.9671	0.480659	0.10762
0.81572	22.72	25.9377	0.481245	0.107617
0.81576	27.85	25.9085	0.481831	0.107617
0.8158	22.63	25.8792	0.482416	0.107621
0.81584	26.98	25.85	0.483001	0.107628
0.81588	22.72	25.8207	0.483585	0.107638
0.81592	27.22	25.7916	0.484169	0.107653
0.81596	22.44	25.7624	0.484752	0.107672
0.816	26.94	25.7333	0.485335	0.107695
0.81604	23.44	25.7042	0.485917	0.107722
0.81608	27.13	25.6751	0.486498	0.107755
0.81612	24.26	25.646	0.487079	0.107792
0.81616	27.03	25.617	0.48766	0.107834
0.8162	24.3	25.588	0.48824	0.107882
0.81624	27.27	25.559	0.488819	0.107935
0.81628	24.54	25.5301	0.489399	0.107993
0.81632	27.61	25.5011	0.489977	0.108057
0.81636	25.26	25.4722	0.490556	0.108127
0.8164	26.84	25.4433	0.491133	0.108203
0.81644	25.98	25.4145	0.491711	0.108286
0.81648	26.41	25.3856	0.492288	0.108374
0.81652	26.89	25.3568	0.492865	0.108469
0.81656	24.78	25.328	0.493441	0.108571
0.8166	27.85	25.2992	0.494016	0.108679
0.81664	23.11	25.2704	0.494591	0.108795
0.81668	27.99	25.2417	0.495166	0.108918
0.81672	22.48	25.213	0.49574	0.109048
0.81676	27.51	25.1843	0.496313	0.109186
0.8168	22.96	25.1557	0.496886	0.109333
0.81684	26.84	25.1271	0.497458	0.109487
0.81688	21.72	25.0985	0.498029	0.10965
0.81692	26.27	25.07	0.498599	0.109822
0.81696	21.86	25.0416	0.499169	0.110002
0.817	25.88	25.0131	0.499737	0.110191
0.81704	22.29	24.9847	0.500305	0.110389
0.81708	26.27	24.9564	0.500872	0.110596
0.81712	22.48	24.9281	0.501438	0.110812
0.81716	26.36	24.8998	0.502003	0.111036
0.8172	22.68	24.8716	0.502567	0.111269
0.81724	26.6	24.8435	0.503131	0.111511
0.81728	23.01	24.8153	0.503694	0.111762
0.81732	26.65	24.7872	0.504255	0.112021
0.81736	23.68	24.7592	0.504816	0.112289
0.8174	27.18	24.7312	0.505377	0.112566
0.81744	24.35	24.7032	0.505936	0.112851
0.81748	25.74	24.6753	0.506495	0.113144
0.81752	25.74	24.6474	0.507053	0.113447
0.81756	24.97	24.6195	0.50761	0.113757
0.8176	25.98	24.5917	0.508166	0.114077
0.81764	24.16	24.5639	0.508722	0.114405
0.81768	27.03	24.5362	0.509277	0.114742
0.81772	22.77	24.5085	0.509831	0.115088
0.81776	27.13	24.4808	0.510384	0.115444
0.8178	21.62	24.4532	0.510936	0.115808
0.81784	26.7	24.4256	0.511487	0.116182
0.81788	21.43	24.3981	0.512037	0.116565
0.81792	26.65	24.3707	0.512586	0.116957
0.81796	21.05	24.3433	0.513134	0.117359
0.818	25.88	24.3159	0.513681	0.117771
0.81804	20.81	24.2886	0.514227	0.118191
0.81808	25.6	24.2614	0.514772	0.118621
0.81812	21.48	24.2342	0.515315	0.11906
0.81816	24.97	24.2071	0.515858	0.119508
0.8182	21.77	24.1801	0.516399	0.119965
0.81824	25.12	24.1531	0.516939	0.120431
0.81828	22.25	24.1261	0.517477	0.120906
0.81832	25.4	24.0992	0.518015	0.12139
0.81836	22.72	24.0724	0.518552	0.121882
0.8184	25.98	24.0456	0.519087	0.122383
0.81844	23.11	24.0189	0.519622	0.122893
0.81848	25.88	23.9922	0.520155	0.123411
0.81852	23.73	23.9656	0.520688	0.123937
0.81856	25.5	23.939	0.521219	0.124472
0.8186	24.45	23.9125	0.52175	0.125016
0.81864	24.3	23.886	0.522279	0.125568
0.81868	25.21	23.8596	0.522808	0.126129
0.81872	23.25	23.8332	0.523335	0.126699
0.81876	25.88	23.8069	0.523862	0.127278
0.8188	21.96	23.7806	0.524387	0.127865
0.81884	26.75	23.7544	0.524912	0.12846
0.81888	21.29	23.7283	0.525435	0.129064
0.81892	25.79	23.7021	0.525957	0.129677
0.81896	20.81	23.6761	0.526478	0.130298
0.819	25.36	23.6501	0.526998	0.130927
0.81904	20.33	23.6242	0.527516	0.131564
0.81908	24.45	23.5983	0.528034	0.132209
0.81912	20.57	23.5725	0.52855	0.132862
0.81916	24.88	23.5468	0.529065	0.133522
0.8192	21.24	23.5211	0.529578	0.134189
0.81924	24.35	23.4955	0.530091	0.134863
0.81928	21.38	23.4699	0.530602	0.135544
0.81932	24.88	23.4444	0.531112	0.136232
0.81936	20.95	23.419	0.531621	0.136925
0.8194	25.07	23.3936	0.532128	0.137624
0.81944	21.62	23.3683	0.532635	0.138329
0.81948	24.83	23.343	0.53314	0.139039
0.81952	21.96	23.3178	0.533645	0.139754
0.81956	25.55	23.2926	0.534148	0.140474
0.8196	23.15	23.2675	0.53465	0.141198
0.81964	25.02	23.2424	0.535152	0.141927
0.81968	23.92	23.2174	0.535652	0.142659
0.81972	24.02	23.1924	0.536152	0.143395
0.81976	25.07	23.1675	0.53665	0.144134
0.8198	22.77	23.1426	0.537148	0.144876
0.81984	25.12	23.1178	0.537645	0.145622
0.81988	21.91	23.093	0.53814	0.14637
0.81992	25.17	23.0682	0.538635	0.147121
0.81996	19.71	23.0436	0.539129	0.147874
0.82	25.64	23.0189	0.539621	0.148629
0.82004	20.04	22.9944	0.540113	0.149387
0.82008	25.12	22.9698	0.540603	0.150146
0.82012	19.42	22.9454	0.541092	0.150906
0.82016	24.21	22.921	0.541581	0.151668
0.8202	19.71	22.8966	0.542068	0.152431
0.82024	24.3	22.8723	0.542553	0.153195
0.82028	20	22.8481	0.543038	0.15396
0.82032	23.68	22.8239	0.543521	0.154725
0.82036	20.62	22.7998	0.544004	0.155491
0.8204	23.87	22.7757	0.544485	0.156257
0.82044	20.76	22.7517	0.544965	0.157023
0.82048	24.35	22.7278	0.545444	0.15779
0.82052	21.58	22.7039	0.545923	0.158557
0.82056	24.11	22.68	0.5464	0.159325
0.8206	21.77	22.6562	0.546876	0.160093
0.82064	24.83	22.6324	0.547352	0.160861
0.82068	22.2	22.6087	0.547826	0.161629
0.82072	24.3	22.585	0.5483	0.162398
0.82076	22.72	22.5614	0.548773	0.163167
0.8208	23.49	22.5378	0.549245	0.163936
0.82084	24.06	22.5142	0.549716	0.164706
0.82088	22.29	22.4907	0.550186	0.165475
0.82092	24.83	22.4672	0.550656	0.166244
0.82096	21.14	22.4438	0.551125	0.167014
0.821	25.45	22.4204	0.551593	0.167782
0.82104	19.9	22.397	0.55206	0.16855
0.82108	25.4	22.3737	0.552526	0.169318
0.82112	20.04	22.3504	0.552991	0.170084
0.82116	24.4	22.3272	0.553455	0.170848
0.8212	19.09	22.3041	0.553918	0.171612
0.82124	24.16	22.281	0.55438	0.172373
0.82128	19.28	22.2579	0.554841	0.173133
0.82132	23.54	22.2349	0.555301	0.173891
0.82136	18.94	22.212	0.55576	0.174646
0.8214	23.2	22.1891	0.556218	0.1754
0.82144	19.9	22.1663	0.556674	0.176152
0.82148	23.3	22.1435	0.557129	0.176902
0.82152	19.66	22.1208	0.557583	0.17765
0.82156	24.06	22.0982	0.558036	0.178396
0.8216	20.24	22.0756	0.558488	0.17914
0.82164	24.06	22.0531	0.558939	0.179883
0.82168	20.76	22.0306	0.559389	0.180625
0.82172	23.92	22.0081	0.559837	0.181364
0.82176	21.48	21.9858	0.560285	0.182103
0.8218	23.59	21.9635	0.560731	0.18284
0.82184	22.44	21.9412	0.561176	0.183577
0.82188	22.34	21.919	0.561621	0.184312
0.82192	23.49	21.8968	0.562064	0.185047
0.82196	21.53	21.8747	0.562506	0.18578
0.822	23.68	21.8527	0.562947	0.186513
0.82204	20.47	21.8307	0.563387	0.187246
0.82208	24.21	21.8087	0.563825	0.187977
0.82212	19.52	21.7869	0.564263	0.188709
0.82216	24.3	21.765	0.564699	0.18944
0.8222	18.89	21.7433	0.565134	0.190171
0.82224	23.73	21.7216	0.565568	0.190902
0.82228	18.42	21.7	0.566	0.191633
0.82232	23.3	21.6785	0.566431	0.192364
0.82236	18.56	21.657	0.56686	0.193096
0.8224	23.59	21.6356	0.567288	0.193827
0.82244	18.94	21.6143	0.567714	0.194559
0.82248	22.92	21.593	0.56814	0.195291
0.82252	18.89	21.5718	0.568563	0.196024
0.82256	23.01	21.5507	0.568985	0.196757
0.8226	18.66	21.5297	0.569406	0.197491
0.82264	22.58	21.5088	0.569825	0.198224
0.82268	19.71	21.4879	0.570243	0.198958
0.82272	22.05	21.4671	0.570659	0.199693
0.82276	20	21.4463	0.571074	0.200427
0.8228	23.83	21.4256	0.571487	0.201162
0.82284	20.52	21.405	0.571899	0.201897
0.82288	23.01	21.3845	0.57231	0.202632
0.82292	21.05	21.364	0.57272	0.203367
0.82296	22.39	21.3436	0.573128	0.204101
0.823	22.25	21.3232	0.573535	0.204836
0.82304	21.38	21.303	0.573941	0.205571
0.82308	23.01	21.2827	0.574345	0.206305
0.82312	20.09	21.2626	0.574748	0.207039
0.82316	23.78	21.2425	0.57515	0.207772
0.8232	18.32	21.2225	0.575551	0.208505
0.82324	23.68	21.2025	0.57595	0.209238
0.82328	18.61	21.1826	0.576348	0.20997
0.82332	23.25	21.1628	0.576744	0.210701
0.82336	17.94	21.143	0.577139	0.211432
0.8234	22.96	21.1233	0.577533	0.212162
0.82344	18.08	21.1037	0.577926	0.212891
0.82348	23.2	21.0842	0.578317	0.21362
0.82352	17.94	21.0647	0.578706	0.214347
0.82356	22.48	21.0453	0.579095	0.215074
0.8236	18.42	21.0259	0.579481	0.215799
0.82364	22.2	21.0066	0.579867	0.216523
0.82368	18.8	20.9874	0.580251	0.217246
0.82372	22.87	20.9683	0.580634	0.217968
0.82376	18.7	20.9492	0.581016	0.218688
0.8238	22.68	20.9302	0.581397	0.219407
0.82384	19.33	20.9112	0.581776	0.220124
0.82388	22.96	20.8923	0.582154	0.22084
0.82392	19.85	20.8734	0.582531	0.221554
0.82396	22.82	20.8546	0.582907	0.222266
0.824	21	20.8359	0.583282	0.222977
0.82404	22.05	20.8172	0.583656	0.223685
0.82408	21.62	20.7985	0.584029	0.224391
0.82412	21.24	20.78	0.584401	0.225096
0.82416	22.34	20.7614	0.584772	0.225798
0.8242	20	20.7429	0.585142	0.226498
0.82424	23.06	20.7245	0.58551	0.227195
0.82428	19.13	20.7061	0.585878	0.22789
0.82432	23.44	20.6878	0.586245	0.228583
0.82436	17.65	20.6695	0.586611	0.229273
0.8244	22.68	20.6512	0.586975	0.22996
0.82444	17.51	20.6331	0.587338	0.230645
0.82448	22.77	20.615	0.587701	0.231328
0.82452	17.17	20.5969	0.588062	0.232007
0.82456	22.44	20.5789	0.588422	0.232685
0.8246	17.32	20.561	0.58878	0.23336
0.82464	21.53	20.5431	0.589138	0.234032
0.82468	17.84	20.5253	0.589494	0.234702
0.82472	21.91	20.5076	0.589849	0.235369
0.82476	18.18	20.4899	0.590203	0.236035
0.8248	21.86	20.4722	0.590556	0.236697
0.82484	18.56	20.4546	0.590907	0.237358
0.82488	22.01	20.4371	0.591258	0.238017
0.82492	19.04	20.4196	0.591608	0.238673
0.82496	22.48	20.4022	0.591956	0.239327
0.825	19.37	20.3848	0.592304	0.23998
0.82504	22.39	20.3675	0.59265	0.240631
0.82508	19.71	20.3502	0.592996	0.24128
0.82512	21.77	20.333	0.593341	0.241927
0.82516	21.24	20.3158	0.593685	0.242573
0.8252	20.81	20.2986	0.594028	0.243217
0.82524	21.91	20.2815	0.59437	0.243861
0.82528	19.13	20.2644	0.594712	0.244503
0.82532	22.68	20.2474	0.595052	0.245145
0.82536	18.99	20.2304	0.595392	0.245785
0.8254	23.35	20.2135	0.59573	0.246425
0.82544	17.27	20.1966	0.596068	0.247065
0.82548	22.39	20.1798	0.596404	0.247704
0.82552	17.08	20.163	0.59674	0.248343
0.82556	22.29	20.1463	0.597075	0.248982
0.8256	17.03	20.1296	0.597408	0.249621
0.82564	21.72	20.113	0.597741	0.25026
0.82568	17.08	20.0964	0.598072	0.250899
0.82572	21.14	20.0799	0.598403	0.251538
0.82576	16.98	20.0634	0.598732	0.252177
0.8258	21.86	20.047	0.59906	0.252816
0.82584	17.55	20.0306	0.599387	0.253456
0.82588	21.38	20.0143	0.599713	0.254097
0.82592	17.94	19.9981	0.600038	0.254737
0.82596	21.38	19.9819	0.600362	0.255378
0.826	18.42	19.9658	0.600685	0.25602
0.82604	22.44	19.9497	0.601007	0.256662
0.82608	18.94	19.9336	0.601328	0.257304
0.82612	22.29	19.9176	0.601648	0.257948
0.82616	19.47	19.9016	0.601967	0.258591
0.8262	20.95	19.8857	0.602286	0.259235
0.82624	20.91	19.8698	0.602603	0.25988
0.82628	20.38	19.854	0.60292	0.260525
0.82632	20.91	19.8382	0.603236	0.261171
0.82636	19.04	19.8225	0.603551	0.261817
0.8264	22.29	19.8068	0.603865	0.262464
0.82644	18.42	19.7911	0.604178	0.263111
0.82648	22.01	19.7755	0.60449	0.263758
0.82652	17.03	19.76	0.604801	0.264406
0.82656	21.96	19.7445	0.605111	0.265054
0.8266	16.5	19.729	0.60542	0.265702
0.82664	22.48	19.7136	0.605727	0.26635
0.82668	16.55	19.6983	0.606034	0.266999
0.82672	21.77	19.683	0.60634	0.267647
0.82676	16.36	19.6678	0.606644	0.268296
0.8268	20.86	19.6526	0.606948	0.268945
0.82684	16.93	19.6375	0.60725	0.269594
0.82688	20.76	19.6225	0.607551	0.270244
0.82692	16.98	19.6075	0.607851	0.270893
0.82696	20.71	19.5925	0.608149	0.271543
0.827	17.03	19.5777	0.608447	0.272194
0.82704	20.95	19.5628	0.608743	0.272845
0.82708	17.94	19.5481	0.609038	0.273496
0.82712	21.62	19.5334	0.609333	0.274148
0.82716	18.03	19.5187	0.609626	0.274801
0.8272	21.38	19.5041	0.609918	0.275454
0.82724	19.09	19.4895	0.610209	0.276107
0.82728	21.05	19.475	0.610499	0.276761
0.82732	20.09	19.4606	0.610789	0.277415
0.82736	20.43	19.4461	0.611077	0.27807
0.8274	21.05	19.4318	0.611365	0.278724
0.82744	18.99	19.4174	0.611651	0.279379
0.82748	21.62	19.4032	0.611937	0.280035
0.82752	17.84	19.3889	0.612221	0.28069
0.82756	22.44	19.3748	0.612505	0.281345
0.8276	16.5	19.3606	0.612788	0.282
0.82764	21.53	19.3465	0.613069	0.282655
0.82768	16.45	19.3325	0.61335	0.28331
0.82772	21.1	19.3185	0.613629	0.283964
0.82776	16.6	19.3046	0.613907	0.284617
0.8278	20.95	19.2908	0.614185	0.285271
0.82784	15.88	19.277	0.614461	0.285923
0.82788	20.43	19.2632	0.614735	0.286575
0.82792	16.36	19.2496	0.615009	0.287226
0.82796	20.76	19.2359	0.615281	0.287876
0.828	17.22	19.2224	0.615553	0.288525
0.82804	20.52	19.2089	0.615823	0.289173
0.82808	16.93	19.1954	0.616092	0.28982
0.82812	20.62	19.182	0.61636	0.290465
0.82816	17.55	19.1687	0.616627	0.291109
0.8282	20.86	19.1554	0.616893	0.291751
0.82824	17.89	19.1421	0.617157	0.292392
0.82828	21.1	19.1289	0.617421	0.293031
0.82832	18.61	19.1158	0.617684	0.293667
0.82836	20.81	19.1027	0.617946	0.294302
0.8284	19.28	19.0897	0.618206	0.294934
0.82844	20.67	19.0767	0.618466	0.295564
0.82848	20.14	19.0637	0.618725	0.296192
0.82852	18.61	19.0508	0.618983	0.296817
0.82856	21.19	19.038	0.61924	0.297439
0.8286	17.84	19.0252	0.619496	0.298059
0.82864	21.38	19.0124	0.619751	0.298675
0.82868	16.65	18.9997	0.620005	0.299289
0.82872	21.72	18.9871	0.620258	0.2999
0.82876	16.26	18.9745	0.62051	0.300507
0.8288	21.19	18.962	0.620761	0.301112
0.82884	15.69	18.9495	0.62101	0.301713
0.82888	21.19	18.9371	0.621258	0.302311
0.82892	15.35	18.9247	0.621505	0.302905
0.82896	20.43	18.9124	0.621751	0.303497
0.829	15.83	18.9002	0.621996	0.304085
0.82904	19.76	18.8881	0.622239	0.30467
0.82908	16.26	18.876	0.622481	0.305251
0.82912	20.24	18.8639	0.622721	0.305829
0.82916	16.55	18.852	0.622961	0.306404
0.8292	20.76	18.8401	0.623199	0.306975
0.82924	16.79	18.8282	0.623436	0.307543
0.82928	20.52	18.8164	0.623672	0.308108
0.82932	17.51	18.8047	0.623906	0.30867
0.82936	21.48	18.793	0.62414	0.309227
0.8294	18.32	18.7814	0.624372	0.309782
0.82944	20.47	18.7698	0.624603	0.310333
0.82948	18.13	18.7583	0.624833	0.310881
0.82952	20.14	18.7469	0.625062	0.311425
0.82956	20.33	18.7355	0.62529	0.311965
0.8296	18.56	18.7242	0.625517	0.312502
0.82964	20.91	18.7129	0.625742	0.313035
0.82968	17.7	18.7017	0.625967	0.313565
0.82972	21.43	18.6905	0.62619	0.314091
0.82976	15.78	18.6794	0.626412	0.314613
0.8298	21.72	18.6684	0.626632	0.315131
0.82984	16.07	18.6574	0.626852	0.315645
0.82988	20.43	18.6465	0.627069	0.316155
0.82992	15.54	18.6357	0.627286	0.316661
0.82996	19.76	18.6249	0.627501	0.317163
0.83	15.35	18.6143	0.627715	0.317661
0.83004	20	18.6037	0.627927	0.318154
0.83008	15.45	18.5931	0.628137	0.318644
0.83012	19.56	18.5827	0.628346	0.31913
0.83016	15.93	18.5723	0.628554	0.319611
0.8302	19.56	18.562	0.62876	0.320088
0.83024	16.55	18.5518	0.628964	0.320562
0.83028	20.38	18.5417	0.629167	0.321031
0.83032	17.12	18.5316	0.629368	0.321496
0.83036	20.14	18.5216	0.629568	0.321957
0.8304	17.51	18.5117	0.629767	0.322414
0.83044	20.57	18.5018	0.629964	0.322867
0.83048	17.94	18.492	0.63016	0.323316
0.83052	20.38	18.4823	0.630354	0.323761
0.83056	18.42	18.4726	0.630547	0.324202
0.8306	19.33	18.4631	0.630739	0.32464
0.83064	19.56	18.4536	0.630929	0.325073
0.83068	18.27	18.4441	0.631118	0.325503
0.83072	20.47	18.4348	0.631305	0.325929
0.83076	17.6	18.4255	0.631491	0.326352
0.8308	20.81	18.4162	0.631675	0.326771
0.83084	15.83	18.4071	0.631858	0.327186
0.83088	20.47	18.398	0.632039	0.327598
0.83092	15.69	18.3891	0.632219	0.328007
0.83096	20.47	18.3802	0.632397	0.328412
0.831	14.83	18.3713	0.632573	0.328814
0.83104	20.09	18.3626	0.632748	0.329213
0.83108	14.68	18.3539	0.632921	0.329608
0.83112	19.56	18.3454	0.633092	0.330001
0.83116	15.11	18.3369	0.633262	0.330391
0.8312	19.47	18.3285	0.633429	0.330777
0.83124	16.21	18.3202	0.633595	0.331161
0.83128	19.56	18.312	0.63376	0.331542
0.83132	16.02	18.3039	0.633922	0.33192
0.83136	19.71	18.2958	0.634083	0.332295
0.8314	16.21	18.2879	0.634243	0.332667
0.83144	20.62	18.28	0.6344	0.333036
0.83148	17.03	18.2722	0.634556	0.333403
0.83152	20.43	18.2645	0.634711	0.333767
0.83156	17.51	18.2568	0.634864	0.334127
0.8316	19.61	18.2492	0.635016	0.334485
0.83164	18.42	18.2417	0.635166	0.33484
0.83168	19.13	18.2343	0.635314	0.335192
0.83172	19.66	18.2269	0.635461	0.335541
0.83176	18.32	18.2197	0.635607	0.335887
0.8318	20.04	18.2124	0.635751	0.336229
0.83184	16.84	18.2053	0.635894	0.336569
0.83188	20.57	18.1983	0.636035	0.336906
0.83192	15.74	18.1913	0.636175	0.337239
0.83196	20.67	18.1844	0.636313	0.33757
0.832	15.3	18.1775	0.636449	0.337897
0.83204	20.62	18.1708	0.636584	0.338222
0.83208	15.02	18.1641	0.636717	0.338543
0.83212	19.56	18.1575	0.636849	0.338862
0.83216	14.92	18.151	0.636979	0.339178
0.8322	19.76	18.1446	0.637108	0.33949
0.83224	14.73	18.1383	0.637234	0.339801
0.83228	19.33	18.132	0.637359	0.340108
0.83232	15.16	18.1259	0.637483	0.340413
0.83236	19.42	18.1198	0.637604	0.340714
0.8324	15.74	18.1138	0.637725	0.341014
0.83244	19.33	18.1078	0.637843	0.34131
0.83248	16.41	18.102	0.63796	0.341604
0.83252	19.33	18.0962	0.638076	0.341894
0.83256	16.98	18.0905	0.63819	0.342182
0.8326	20.33	18.0848	0.638303	0.342467
0.83264	17.55	18.0793	0.638415	0.342748
0.83268	20.09	18.0738	0.638525	0.343027
0.83272	18.03	18.0683	0.638634	0.343302
0.83276	19.04	18.0629	0.638742	0.343574
0.8328	19.85	18.0576	0.638848	0.343842
0.83284	18.03	18.0523	0.638953	0.344107
0.83288	19.95	18.0471	0.639057	0.344369
0.83292	16.65	18.042	0.63916	0.344626
0.83296	20.43	18.0369	0.639262	0.34488
0.833	16.36	18.0319	0.639362	0.34513
0.83304	21	18.027	0.639461	0.345376
0.83308	15.11	18.0221	0.639559	0.345619
0.83312	20	18.0172	0.639655	0.345857
0.83316	14.97	18.0125	0.63975	0.346091
0.8332	20.57	18.0078	0.639844	0.346322
0.83324	14.49	18.0032	0.639936	0.346548
0.83328	19.66	17.9986	0.640027	0.34677
0.83332	14.83	17.9942	0.640117	0.346988
0.83336	19.18	17.9897	0.640205	0.347202
0.8334	15.21	17.9854	0.640292	0.347412
0.83344	18.85	17.9811	0.640377	0.347618
0.83348	15.93	17.9769	0.640462	0.347819
0.83352	19.76	17.9728	0.640544	0.348016
0.83356	15.97	17.9687	0.640626	0.34821
0.8336	19.8	17.9647	0.640706	0.348399
0.83364	16.65	17.9607	0.640785	0.348584
0.83368	20.09	17.9568	0.640863	0.348765
0.83372	16.88	17.953	0.64094	0.348941
0.83376	19.56	17.9492	0.641015	0.349114
0.8338	18.08	17.9455	0.64109	0.349283
0.83384	19.23	17.9418	0.641163	0.349448
0.83388	19.28	17.9382	0.641235	0.349609
0.83392	18.13	17.9347	0.641306	0.349766
0.83396	19.95	17.9312	0.641377	0.349919
0.834	16.74	17.9277	0.641445	0.350068
0.83404	20.28	17.9243	0.641513	0.350212
0.83408	15.69	17.921	0.64158	0.350353
0.83412	20.38	17.9177	0.641645	0.35049
0.83416	15.02	17.9145	0.64171	0.350623
0.8342	20.33	17.9114	0.641773	0.350752
0.83424	14.83	17.9083	0.641834	0.350876
0.83428	19.66	17.9053	0.641895	0.350997
0.83432	14.83	17.9023	0.641954	0.351113
0.83436	19.13	17.8994	0.642012	0.351225
0.8344	14.92	17.8966	0.642069	0.351333
0.83444	19.09	17.8938	0.642124	0.351436
0.83448	15.3	17.8911	0.642178	0.351536
0.83452	18.89	17.8885	0.642231	0.351631
0.83456	15.5	17.8859	0.642282	0.351721
0.8346	18.99	17.8834	0.642332	0.351807
0.83464	16.07	17.8809	0.642381	0.351889
0.83468	19.66	17.8786	0.642429	0.351967
0.83472	16.69	17.8762	0.642475	0.35204
0.83476	20.09	17.874	0.642521	0.352108
0.8348	16.79	17.8717	0.642565	0.352173
0.83484	19.56	17.8696	0.642609	0.352233
0.83488	17.41	17.8674	0.642651	0.352288
0.83492	19.52	17.8654	0.642692	0.35234
0.83496	18.75	17.8634	0.642733	0.352387
0.835	18.32	17.8614	0.642772	0.352429
0.83504	19.71	17.8595	0.642811	0.352468
0.83508	17.41	17.8576	0.642848	0.352502
0.83512	19.85	17.8558	0.642884	0.352532
0.83516	15.97	17.854	0.64292	0.352558
0.8352	20.43	17.8523	0.642954	0.35258
0.83524	15.35	17.8506	0.642987	0.352598
0.83528	20.43	17.849	0.64302	0.352612
0.83532	14.63	17.8475	0.643051	0.352622
0.83536	19.66	17.846	0.643081	0.352627
0.8354	14.97	17.8445	0.643109	0.352629
0.83544	18.8	17.8432	0.643137	0.352627
0.83548	14.63	17.8418	0.643163	0.35262
0.83552	18.99	17.8406	0.643188	0.352609
0.83556	15.07	17.8394	0.643212	0.352594
0.8356	19.09	17.8382	0.643235	0.352575
0.83564	15.35	17.8372	0.643257	0.352552
0.83568	18.99	17.8361	0.643277	0.352524
0.83572	15.64	17.8352	0.643297	0.352492
0.83576	19.85	17.8342	0.643315	0.352455
0.8358	16.31	17.8334	0.643333	0.352414
0.83584	19.71	17.8326	0.643349	0.352368
0.83588	16.84	17.8318	0.643364	0.352318
0.83592	20.04	17.8311	0.643379	0.352263
0.83596	18.03	17.8304	0.643392	0.352203
0.836	19.18	17.8297	0.643405	0.352139
0.83604	18.27	17.8292	0.643417	0.352071
0.83608	18.66	17.8286	0.643428	0.351998
0.83612	19.37	17.8281	0.643438	0.35192
0.83616	17.51	17.8276	0.643447	0.351838
0.8362	19.9	17.8272	0.643456	0.351752
0.83624	16.26	17.8268	0.643463	0.351661
0.83628	20.81	17.8265	0.64347	0.351567
0.83632	15.21	17.8262	0.643476	0.351468
0.83636	20.38	17.826	0.64348	0.351365
0.8364	14.73	17.8258	0.643484	0.351258
0.83644	20.09	17.8257	0.643487	0.351147
0.83648	14.68	17.8256	0.643488	0.351032
0.83652	19.47	17.8256	0.643489	0.350912
				0.350789
