# Supplementary material for: Shear Thickening Fluids in Cork Agglomerates: An Exploration of Advantages and Drawbacks
Source: Preprints.org preprint supplement (doi:10.20944/preprints202304.0004.v1), 2023-04-03
Supplement: Supplementary file 17 [file Dynamic_Stress_Strain.xlsx]

## Sheet: Table_Peaks
	Sample	Total mass	STF mass	Peak 1	Peak 1 duration	Peak 2	Peak 2 duration	Peak 2 / Peak 1	Max tensão	Max def	Max aceleração
		(g)	(g)	(N)	(ms)	(N)	(ms)		(MPa)		(m/s2)
	STF_0_x	30.0437	0	5972.09	44.4	1015.02	64.48	0.16996	2.37272	0.621961	295.941
	STF_10_x	30	3	6061.28	45.88	960.023	81.16	0.158386	2.41838	0.658442	300.361
	STF_20_x	30.0252	6.0245	6618.68	49.16	797.164	84.24	0.120442	2.58349	0.734453	327.982
	STF_30_x	30.1433	9.16667	7797.34	41.96	827.696	84.52	0.106151	3.08133	0.778233	386.39

## Sheet: Curvas
	Isocurvas
	100 kJ/m^3				200 kJ/m^3
	y = -1.5726x + 1.2136				y = -0.935x + 1.3553
	x	y			x	y
	0.29	0.757546			0.42	0.9626
	0.300582	0.740905			0.424525	0.958369
	0.404551	0.577403			0.545265	0.845477
	0.45	0.50593			0.6	0.7943
	300 kJ/m^3				400 kJ/m^3
	y = 0.5244x + 0.9599				y = 2.8803x + 0.0315
	x	y			x	y
	0.51	1.22734			0.58	1.70207
	0.519103	1.23212			0.5892	1.72857
	0.645566	1.29843			0.710027	2.07659
	0.696185	1.32498			0.76	2.22053

## Sheet: IsoCurvas
100 KJ/m3	Deformação	Tensão		100 KJ/m3	Deformação	Tensão
0_1	0.317964	0.77053		0_1	0.317964	0.77053
0_2	0.339628	0.721649		10_1	0.300582	0.688244				regressão linear
10_1	0.300582	0.688244		20_1	0.404551	0.588035
10_2	0.35645	0.680719		30_1	0.441348	0.504696
20_1	0.404551	0.588035
20_2	0.396346	0.5854
30_1	0.441348	0.504696		200 KJ/m3	Deformação	Tensão
30_2	0.490381	0.495207		0_1	0.430868	0.987107
				10_1	0.424525	0.926754
				20_1	0.545265	0.839297
200 KJ/m3	Deformação	Tensão		30_1	0.598427	0.79871
0_1	0.430868	0.987107
0_2	0.455317	1.00512
10_1	0.424525	0.926754		300 KJ/m3	Deformação	Tensão
10_2	0.479815	0.935609		0_1	0.521923	1.25812
20_1	0.545265	0.839297		10_1	0.519103	1.2261
20_2	0.53756	0.840052		20_1	0.645566	1.23495
30_1	0.598427	0.79871		30_1	0.696185	1.36989
30_2	0.657567	0.738442
				400 KJ/m3	Deformação	Tensão
300 KJ/m3	Deformação	Tensão		0_1	0.588837	1.8114
0_1	0.521923	1.25812		10_1	0.5892	1.67124
0_2	0.542339	1.3437		20_1	0.710027	1.97466
10_1	0.519103	1.2261		30_1	0.752803	2.27532
10_2	0.573616	1.24989
20_1	0.645566	1.23495
20_2	0.637635	1.23414
30_1	0.696185	1.36989
30_2	0.752229	1.60784
400 KJ/m3	Deformação	Tensão
0_1	0.588837	1.8114
0_2	0.604649	1.95113
10_1	0.5892	1.67124
10_2	0.639741	1.86955
20_1	0.710027	1.97466
20_2	0.702541	1.9483
30_1	0.752803	2.27532
30_2	0.798627	2.83874

## Sheet: Densidade Energética
	PARA 0 A 0.5
	Sample	Energy Density (MJ / m3)	Energy Density (kJ / m3)		Sample	Energy Density (MJ / m3)
	0_x	0.273525	273.525		0_a	0.273525	273.525
	0_y	0.247771	247.771		10_b	0.248353	248.353
	10_x	0.277373	277.373		20_c	0.164029	164.029
	10_y	0.219333	219.333		30_d	0.132268	132.268
	20_x	0.164029	164.029
	20_y	0.169904	169.904
	30_x	0.132268	132.268
	30_y	0.104826	104.826
	10_1	0.277373
	10_2	0.219333
	10_Final	0.248353
