# Supplementary material for: Shear Thickening Fluids in Cork Agglomerates: An Exploration of Advantages and Drawbacks
Source: Preprints.org preprint supplement (doi:10.20944/preprints202304.0004.v1), 2023-04-03
Supplement: Supplementary file 18 [file Peak Forces_Peak Ratio_Acceleration.xlsx]

## Sheet: Sheet1
Força	0% 1	0% 2	10% 1	10%2	20%1	20%2	30%1	30%2		PEAK RATIO	0	0.1	0.2	0.3				ACELERAÇÃO	0	0.1	0.2	0.3
1	5977.09	1005.02	6030.39	930.023	6518.59	767.164	7684.34	787.696			0.168145	0.154223	0.117689	0.102507				F=MA OU A=F/M	30.0934	30.4618	32.9279	38.8165
2	5957.46	1077.7	5950.82	1012.45	6688.56	794.972	7966.12	851.572			0.1809	0.170136	0.118856	0.106899					30.5175	30.0598	33.7864	40.2399
3	6041.42	1013.42	6117.64	973.362	6629.48	836.162	7814.42	822.442			0.167745	0.159107	0.126128	0.105247					29.742	30.9025	33.488	39.4736
4	5887.89	1014.81	6081.81	983.357	6506.93	731.472	7887.91	918.578			0.172355	0.161688	0.112414	0.116454					30.2983	30.7215	32.8689	39.8448
5	5998.02	965.43	6126.45	902.993	6748.71	856.942	7632.35	759.62			0.160958	0.147392	0.126979	0.0995263					30.1687	30.947	34.0903	38.5539
Média	5972.38	1015.28	6061.42	960.437	6618.45	797.342	7797.03	827.982		MÉDIA	0.170021	0.158509	0.120413	0.106127				Média	30.164	30.6185	33.4323	39.3857
Desvio	50.6113	36.03	64.8086	39.0448	94.2485	45.4188	124.074	54.9385		DESVIO	0.00655192	0.00758425	0.00546979	0.00573921				Desvio	0.25539	0.327373	0.476085	0.626743
	0% STF	10% STF	20% STF	30% STF							0% STF	10% STF	20% STF	30% STF					0% STF	10% STF	20% STF	30% STF
F1	5972.38	6061.42	6618.45	7797.03							0.170021	0.158509	0.120413	0.106127					30.164	30.6185	33.4323	39.3857
F2	1015.28	960.437	797.342	827.982							0.00655192	0.00758425	0.00546979	0.00573921					0.25539	0.327373	0.476085	0.626743
D1	50.5576	64.8086	94.2485	124.074
D2	36.03	39.0448	45.4188	54.9385

## Sheet: Sheet3
0.494	-0.0432108	307.079
0.49404	-0.0424992	307.025
0.49408	-0.0417958	306.97
0.49412	-0.0411017	306.914
0.49416	-0.0404176	306.857
0.4942	-0.0397447	306.8
0.49424	-0.0390837	306.742
0.49428	-0.0384358	306.683
0.49432	-0.0378016	306.624
0.49436	-0.037182	306.564
0.4944	-0.0365778	306.503
0.49444	-0.0359894	306.441
0.49448	-0.0354177	306.379
0.49452	-0.034863	306.316
0.49456	-0.0343259	306.252
0.4946	-0.033807	306.188
0.49464	-0.0333068	306.123
0.49468	-0.0328257	306.057
0.49472	-0.0323644	305.991
0.49476	-0.0319233	305.924
0.4948	-0.0315029	305.857
0.49484	-0.0311037	305.789
0.49488	-0.0307263	305.72
0.49492	-0.030371	305.651
0.49496	-0.0300385	305.581
0.495	-0.0297289	305.511
0.49504	-0.0294429	305.44
0.49508	-0.0291806	305.369
0.49512	-0.0289424	305.297
0.49516	-0.0287286	305.224
0.4952	-0.0285394	305.151
0.49524	-0.028375	305.078
0.49528	-0.0282356	305.004
0.49532	-0.0281217	304.929
0.49536	-0.0280333	304.854
0.4954	-0.027971	304.779
0.49544	-0.0279349	304.703
0.49548	-0.0279253	304.627
0.49552	-0.0279427	304.55
0.49556	-0.0279871	304.472
0.4956	-0.028059	304.395
0.49564	-0.0281586	304.317
0.49568	-0.0282861	304.238
0.49572	-0.0284415	304.159
0.49576	-0.0286249	304.08
0.4958	-0.0288363	304
0.49584	-0.0290755	303.92
0.49588	-0.0293427	303.84
0.49592	-0.0296378	303.759
0.49596	-0.0299608	303.677
0.496	-0.0303119	303.596
0.49604	-0.030691	303.514
0.49608	-0.0310982	303.432
0.49612	-0.0315336	303.349
0.49616	-0.031997	303.266
0.4962	-0.0324886	303.183
0.49624	-0.0330081	303.1
0.49628	-0.0335556	303.016
0.49632	-0.0341308	302.932
0.49636	-0.0347338	302.848
0.4964	-0.0353643	302.763
0.49644	-0.0360224	302.678
0.49648	-0.0367079	302.593
0.49652	-0.0374209	302.508
0.49656	-0.0381615	302.422
0.4966	-0.0389295	302.337
0.49664	-0.0397252	302.251
0.49668	-0.0405484	302.164
0.49672	-0.0413993	302.078
0.49676	-0.0422777	301.991
0.4968	-0.0431836	301.904
0.49684	-0.0441168	301.817
0.49688	-0.0450773	301.729
0.49692	-0.0460648	301.642
0.49696	-0.0470794	301.554
0.497	-0.0481207	301.466
0.49704	-0.0491887	301.378
0.49708	-0.0502832	301.289
0.49712	-0.0514042	301.201
0.49716	-0.0525514	301.112
0.4972	-0.0537247	301.023
0.49724	-0.054924	300.934
0.49728	-0.056149	300.845
0.49732	-0.0573992	300.756
0.49736	-0.0586745	300.667
0.4974	-0.0599743	300.577
0.49744	-0.0612982	300.488
0.49748	-0.0626458	300.398
0.49752	-0.0640164	300.308
0.49756	-0.0654097	300.218
0.4976	-0.0668251	300.128
0.49764	-0.0682619	300.038
0.49768	-0.0697195	299.947
0.49772	-0.0711972	299.857
0.49776	-0.0726943	299.766
0.4978	-0.0742098	299.676
0.49784	-0.0757429	299.585
0.49788	-0.0772926	299.494
0.49792	-0.0788578	299.403
0.49796	-0.0804375	299.312
0.498	-0.0820307	299.221
0.49804	-0.0836362	299.13
0.49808	-0.0852529	299.038
0.49812	-0.0868797	298.947
0.49816	-0.0885155	298.856
0.4982	-0.0901591	298.764
0.49824	-0.0918091	298.673
0.49828	-0.0934643	298.581
0.49832	-0.0951231	298.49
0.49836	-0.096784	298.398
0.4984	-0.0984456	298.306
0.49844	-0.100106	298.215
0.49848	-0.101765	298.123
0.49852	-0.103419	298.031
0.49856	-0.105068	297.939
0.4986	-0.10671	297.847
0.49864	-0.108344	297.755
0.49868	-0.109967	297.663
0.49872	-0.111577	297.571
0.49876	-0.113174	297.48
0.4988	-0.114755	297.388
0.49884	-0.116318	297.295
0.49888	-0.117862	297.203
0.49892	-0.119384	297.111
0.49896	-0.120884	297.019
0.499	-0.122358	296.927
0.49904	-0.123806	296.835
0.49908	-0.125227	296.743
0.49912	-0.126619	296.651
0.49916	-0.127982	296.559
0.4992	-0.129313	296.466
0.49924	-0.130612	296.374
0.49928	-0.131879	296.282
0.49932	-0.13311	296.19
0.49936	-0.134307	296.098
0.4994	-0.135468	296.005
0.49944	-0.136591	295.913
0.49948	-0.137676	295.821
0.49952	-0.138722	295.729
0.49956	-0.139729	295.637
0.4996	-0.140694	295.545
0.49964	-0.141619	295.453
0.49968	-0.142501	295.361
0.49972	-0.143341	295.268
0.49976	-0.144138	295.176
0.4998	-0.144892	295.084
0.49984	-0.145601	294.992
0.49988	-0.146265	294.9
0.49992	-0.146884	294.808
0.49996	-0.147457	294.716
0.5	-0.147983	294.624
0.50004	-0.148461	294.532
0.50008	-0.148892	294.44
0.50012	-0.149274	294.348
0.50016	-0.149607	294.256
0.5002	-0.14989	294.164
0.50024	-0.150123	294.072
0.50028	-0.150305	293.98
0.50032	-0.150436	293.888
0.50036	-0.150515	293.797
0.5004	-0.150542	293.705
0.50044	-0.150516	293.613
0.50048	-0.150436	293.521
0.50052	-0.150303	293.429
0.50056	-0.150117	293.337
0.5006	-0.149878	293.245
0.50064	-0.149586	293.154
0.50068	-0.149243	293.062
0.50072	-0.148847	292.97
0.50076	-0.148401	292.878
0.5008	-0.147905	292.787
0.50084	-0.147359	292.695
0.50088	-0.146765	292.604
0.50092	-0.146122	292.512
0.50096	-0.145433	292.42
0.501	-0.144696	292.329
0.50104	-0.143914	292.237
0.50108	-0.143086	292.146
0.50112	-0.142214	292.054
0.50116	-0.141298	291.963
0.5012	-0.140339	291.871
0.50124	-0.139339	291.78
0.50128	-0.138296	291.688
0.50132	-0.137213	291.597
0.50136	-0.136089	291.505
0.5014	-0.134927	291.414
0.50144	-0.133725	291.322
0.50148	-0.132487	291.231
0.50152	-0.131213	291.139
0.50156	-0.129903	291.048
0.5016	-0.128559	290.956
0.50164	-0.127183	290.865
0.50168	-0.125774	290.773
0.50172	-0.124335	290.682
0.50176	-0.122865	290.591
0.5018	-0.121366	290.499
0.50184	-0.119839	290.408
0.50188	-0.118284	290.317
0.50192	-0.116702	290.225
0.50196	-0.115093	290.134
0.502	-0.11346	290.043
0.50204	-0.111802	289.951
0.50208	-0.110122	289.86
0.50212	-0.108419	289.769
0.50216	-0.106696	289.678
0.5022	-0.104953	289.586
0.50224	-0.103193	289.495
0.50228	-0.101415	289.404
0.50232	-0.0996227	289.312
0.50236	-0.0978163	289.221
0.5024	-0.0959974	289.13
0.50244	-0.0941677	289.038
0.50248	-0.0923286	288.947
0.50252	-0.0904815	288.856
0.50256	-0.0886277	288.764
0.5026	-0.0867686	288.673
0.50264	-0.0849052	288.582
0.50268	-0.0830385	288.49
0.50272	-0.0811695	288.399
0.50276	-0.0792991	288.308
0.5028	-0.0774283	288.216
0.50284	-0.0755579	288.125
0.50288	-0.0736892	288.033
0.50292	-0.0718232	287.942
0.50296	-0.0699608	287.851
0.503	-0.0681032	287.759
0.50304	-0.0662513	287.668
0.50308	-0.0644061	287.576
0.50312	-0.0625687	287.485
0.50316	-0.06074	287.393
0.5032	-0.0589206	287.302
0.50324	-0.0571115	287.211
0.50328	-0.0553132	287.119
0.50332	-0.0535265	287.028
0.50336	-0.0517518	286.936
0.5034	-0.0499899	286.844
0.50344	-0.0482412	286.753
0.50348	-0.0465064	286.661
0.50352	-0.0447859	286.57
0.50356	-0.0430802	286.478
0.5036	-0.0413896	286.386
0.50364	-0.0397143	286.295
0.50368	-0.0380547	286.203
0.50372	-0.0364108	286.111
0.50376	-0.034783	286.02
0.5038	-0.0331715	285.928
0.50384	-0.0315764	285.836
0.50388	-0.029998	285.744
0.50392	-0.0284367	285.652
0.50396	-0.0268925	285.561
0.504	-0.0253658	285.469
0.50404	-0.0238567	285.377
0.50408	-0.0223652	285.285
0.50412	-0.0208914	285.193
0.50416	-0.0194354	285.101
0.5042	-0.0179971	285.009
0.50424	-0.0165765	284.918
0.50428	-0.0151736	284.826
0.50432	-0.0137884	284.734
0.50436	-0.012421	284.642
0.5044	-0.0110714	284.55
0.50444	-0.00973995	284.458
0.50448	-0.00842684	284.366
0.50452	-0.00713233	284.274
0.50456	-0.00585665	284.182
0.5046	-0.00460002	284.09
0.50464	-0.00336257	283.998
0.50468	-0.00214438	283.905
0.50472	-0.000945466	283.813
0.50476	0.00023425	283.721
0.5048	0.00139496	283.629
0.50484	0.00253692	283.537
0.50488	0.00366041	283.444
0.50492	0.00476567	283.352
0.50496	0.00585289	283.26
0.505	0.00692225	283.168
0.50504	0.00797391	283.075
0.50508	0.00900805	282.983
0.50512	0.0100249	282.891
0.50516	0.0110247	282.799
0.5052	0.0120077	282.706
0.50524	0.0129743	282.614
0.50528	0.0139251	282.522
0.50532	0.0148605	282.429
0.50536	0.0157811	282.337
0.5054	0.0166876	282.245
0.50544	0.0175805	282.152
0.50548	0.0184606	282.06
0.50552	0.0193284	281.968
0.50556	0.0201847	281.875
0.5056	0.0210302	281.783
0.50564	0.0218659	281.69
0.50568	0.0226927	281.598
0.50572	0.0235117	281.506
0.50576	0.0243236	281.413
0.5058	0.0251295	281.321
0.50584	0.0259301	281.228
0.50588	0.026726	281.136
0.50592	0.0275178	281.043
0.50596	0.0283058	280.951
0.506	0.0290904	280.858
0.50604	0.0298721	280.765
0.50608	0.0306514	280.673
0.50612	0.031429	280.58
0.50616	0.0322056	280.488
0.5062	0.032982	280.395
0.50624	0.0337591	280.303
0.50628	0.0345378	280.21
0.50632	0.0353187	280.117
0.50636	0.0361024	280.025
0.5064	0.0368895	279.932
0.50644	0.0376804	279.84
0.50648	0.0384752	279.747
0.50652	0.0392742	279.654
0.50656	0.0400775	279.562
0.5066	0.0408852	279.469
0.50664	0.0416976	279.376
0.50668	0.0425147	279.284
0.50672	0.0433369	279.191
0.50676	0.0441642	279.098
0.5068	0.0449969	279.006
0.50684	0.0458351	278.913
0.50688	0.0466788	278.82
0.50692	0.0475281	278.727
0.50696	0.0483829	278.635
0.507	0.0492432	278.542
0.50704	0.050109	278.449
0.50708	0.0509804	278.356
0.50712	0.0518574	278.263
0.50716	0.0527399	278.171
0.5072	0.0536279	278.078
0.50724	0.0545214	277.985
0.50728	0.0554203	277.892
0.50732	0.0563245	277.799
0.50736	0.057234	277.706
0.5074	0.0581487	277.613
0.50744	0.0590685	277.52
0.50748	0.0599931	277.428
0.50752	0.0609222	277.335
0.50756	0.0618555	277.242
0.5076	0.0627927	277.149
0.50764	0.0637334	277.056
0.50768	0.0646773	276.963
0.50772	0.0656243	276.87
0.50776	0.066574	276.777
0.5078	0.0675261	276.684
0.50784	0.0684804	276.591
0.50788	0.0694364	276.498
0.50792	0.0703936	276.405
0.50796	0.0713517	276.312
0.508	0.0723101	276.219
0.50804	0.0732683	276.126
0.50808	0.0742256	276.032
0.50812	0.0751815	275.939
0.50816	0.0761352	275.846
0.5082	0.0770861	275.753
0.50824	0.0780336	275.66
0.50828	0.0789767	275.567
0.50832	0.0799146	275.473
0.50836	0.0808463	275.38
0.5084	0.0817708	275.287
0.50844	0.082687	275.194
0.50848	0.0835936	275.1
0.50852	0.0844894	275.007
0.50856	0.0853732	274.914
0.5086	0.0862437	274.821
0.50864	0.0870998	274.727
0.50868	0.0879403	274.634
0.50872	0.0887638	274.541
0.50876	0.0895692	274.447
0.5088	0.0903552	274.354
0.50884	0.0911204	274.261
0.50888	0.0918635	274.167
0.50892	0.0925831	274.074
0.50896	0.0932776	273.981
0.509	0.0939457	273.887
0.50904	0.0945859	273.794
0.50908	0.0951971	273.701
0.50912	0.0957781	273.607
0.50916	0.096328	273.514
0.5092	0.0968459	273.42
0.50924	0.0973311	273.327
0.50928	0.0977829	273.234
0.50932	0.0982006	273.14
0.50936	0.0985837	273.047
0.5094	0.0989316	272.953
0.50944	0.0992439	272.86
0.50948	0.0995201	272.766
0.50952	0.09976	272.673
0.50956	0.0999633	272.579
0.5096	0.10013	272.486
0.50964	0.100259	272.392
0.50968	0.100352	272.299
0.50972	0.100408	272.205
0.50976	0.100427	272.112
0.5098	0.10041	272.019
0.50984	0.100356	271.925
0.50988	0.100266	271.832
0.50992	0.100141	271.738
0.50996	0.0999806	271.645
0.51	0.0997848	271.552
0.51004	0.0995542	271.458
0.51008	0.0992891	271.365
0.51012	0.09899	271.271
0.51016	0.0986576	271.178
0.5102	0.0982925	271.084
0.51024	0.0978953	270.991
0.51028	0.0974669	270.898
0.51032	0.0970078	270.804
0.51036	0.0965189	270.711
0.5104	0.0960008	270.617
0.51044	0.0954539	270.524
0.51048	0.0948787	270.431
0.51052	0.0942758	270.337
0.51056	0.0936457	270.244
0.5106	0.0929891	270.151
0.51064	0.0923066	270.057
0.51068	0.091599	269.964
0.51072	0.090867	269.871
0.51076	0.0901114	269.777
0.5108	0.0893329	269.684
0.51084	0.0885323	269.591
0.51088	0.0877103	269.498
0.51092	0.0868675	269.405
0.51096	0.0860043	269.311
0.511	0.0851213	269.218
0.51104	0.0842188	269.125
0.51108	0.0832974	269.032
0.51112	0.0823575	268.939
0.51116	0.0814001	268.846
0.5112	0.0804259	268.753
0.51124	0.0794358	268.66
0.51128	0.078431	268.566
0.51132	0.077412	268.473
0.51136	0.0763798	268.38
0.5114	0.0753349	268.287
0.51144	0.0742781	268.194
0.51148	0.0732097	268.101
0.51152	0.0721304	268.008
0.51156	0.0710409	267.915
0.5116	0.0699416	267.822
0.51164	0.0688333	267.729
0.51168	0.0677167	267.637
0.51172	0.0665927	267.544
0.51176	0.0654619	267.451
0.5118	0.0643253	267.358
0.51184	0.0631835	267.265
0.51188	0.0620374	267.172
0.51192	0.0608876	267.08
0.51196	0.0597347	266.987
0.512	0.0585791	266.894
0.51204	0.0574213	266.801
0.51208	0.0562616	266.709
0.51212	0.0551005	266.616
0.51216	0.0539386	266.524
0.5122	0.0527765	266.431
0.51224	0.0516148	266.338
0.51228	0.0504543	266.246
0.51232	0.0492956	266.153
0.51236	0.0481393	266.061
0.5124	0.0469859	265.968
0.51244	0.0458358	265.876
0.51248	0.0446894	265.783
0.51252	0.0435471	265.691
0.51256	0.0424091	265.598
0.5126	0.041276	265.505
0.51264	0.040148	265.413
0.51268	0.0390258	265.321
0.51272	0.03791	265.228
0.51276	0.036801	265.136
0.5128	0.0356994	265.043
0.51284	0.0346059	264.951
0.51288	0.0335207	264.858
0.51292	0.0324444	264.766
0.51296	0.0313769	264.673
0.513	0.0303183	264.581
0.51304	0.0292687	264.489
0.51308	0.028228	264.396
0.51312	0.0271963	264.304
0.51316	0.0261735	264.212
0.5132	0.0251601	264.119
0.51324	0.0241561	264.027
0.51328	0.0231618	263.935
0.51332	0.0221775	263.842
0.51336	0.0212034	263.75
0.5134	0.0202398	263.658
0.51344	0.0192869	263.565
0.51348	0.0183448	263.473
0.51352	0.0174136	263.381
0.51356	0.0164931	263.288
0.5136	0.0155832	263.196
0.51364	0.0146838	263.104
0.51368	0.0137947	263.011
0.51372	0.0129158	262.919
0.51376	0.0120472	262.827
0.5138	0.0111887	262.734
0.51384	0.0103404	262.642
0.51388	0.00950236	262.55
0.51392	0.00867436	262.457
0.51396	0.00785621	262.365
0.514	0.00704764	262.272
0.51404	0.00624829	262.18
0.51408	0.0054578	262.088
0.51412	0.00467578	261.995
0.51416	0.00390191	261.903
0.5142	0.0031359	261.81
0.51424	0.00237755	261.718
0.51428	0.00162672	261.626
0.51432	0.000883351	261.533
0.51436	0.000147359	261.441
0.5144	-0.000581368	261.348
0.51444	-0.00130303	261.256
0.51448	-0.00201794	261.163
0.51452	-0.00272651	261.071
0.51456	-0.00342925	260.978
0.5146	-0.00412675	260.885
0.51464	-0.00481957	260.793
0.51468	-0.00550824	260.7
0.51472	-0.00619321	260.608
0.51476	-0.00687489	260.515
0.5148	-0.00755368	260.422
0.51484	-0.00822994	260.329
0.51488	-0.00890411	260.237
0.51492	-0.00957664	260.144
0.51496	-0.0102481	260.051
0.515	-0.0109191	259.958
0.51504	-0.0115904	259.865
0.51508	-0.0122627	259.773
0.51512	-0.0129368	259.68
0.51516	-0.0136133	259.587
0.5152	-0.0142928	259.494
0.51524	-0.014976	259.401
0.51528	-0.0156633	259.308
0.51532	-0.0163552	259.215
0.51536	-0.0170523	259.122
0.5154	-0.0177548	259.029
0.51544	-0.0184634	258.936
0.51548	-0.0191786	258.843
0.51552	-0.0199011	258.75
0.51556	-0.0206316	258.657
0.5156	-0.0213708	258.564
0.51564	-0.0221195	258.471
0.51568	-0.0228782	258.377
0.51572	-0.0236475	258.284
0.51576	-0.0244279	258.191
0.5158	-0.0252195	258.098
0.51584	-0.0260225	258.004
0.51588	-0.0268369	257.911
0.51592	-0.027663	257.818
0.51596	-0.0285007	257.724
0.516	-0.0293502	257.631
0.51604	-0.0302114	257.537
0.51608	-0.0310846	257.444
0.51612	-0.0319698	257.35
0.51616	-0.0328674	257.257
0.5162	-0.0337773	257.163
0.51624	-0.0347	257.07
0.51628	-0.0356355	256.976
0.51632	-0.0365841	256.882
0.51636	-0.037546	256.788
0.5164	-0.0385214	256.695
0.51644	-0.0395103	256.601
0.51648	-0.0405129	256.507
0.51652	-0.0415293	256.413
0.51656	-0.0425595	256.32
0.5166	-0.0436036	256.226
0.51664	-0.0446615	256.132
0.51668	-0.0457331	256.038
0.51672	-0.0468182	255.944
0.51676	-0.0479167	255.85
0.5168	-0.0490284	255.756
0.51684	-0.0501533	255.661
0.51688	-0.0512913	255.567
0.51692	-0.0524424	255.473
0.51696	-0.0536067	255.379
0.517	-0.054784	255.284
0.51704	-0.0559744	255.19
0.51708	-0.0571778	255.095
0.51712	-0.0583942	255.001
0.51716	-0.0596235	254.906
0.5172	-0.0608657	254.811
0.51724	-0.0621204	254.717
0.51728	-0.0633877	254.622
0.51732	-0.0646672	254.527
0.51736	-0.0659589	254.432
0.5174	-0.0672627	254.337
0.51744	-0.0685784	254.243
0.51748	-0.0699062	254.148
0.51752	-0.0712458	254.052
0.51756	-0.0725971	253.957
0.5176	-0.0739601	253.862
0.51764	-0.0753345	253.767
0.51768	-0.07672	253.672
0.51772	-0.0781164	253.576
0.51776	-0.0795233	253.481
0.5178	-0.0809401	253.385
0.51784	-0.0823663	253.29
0.51788	-0.0838015	253.194
0.51792	-0.085245	253.099
0.51796	-0.0866964	253.003
0.518	-0.0881553	252.907
0.51804	-0.089621	252.811
0.51808	-0.0910931	252.715
0.51812	-0.0925709	252.619
0.51816	-0.0940537	252.523
0.5182	-0.0955406	252.427
0.51824	-0.0970307	252.33
0.51828	-0.0985229	252.234
0.51832	-0.100016	252.138
0.51836	-0.101509	252.041
0.5184	-0.103001	251.945
0.51844	-0.104491	251.848
0.51848	-0.105977	251.752
0.51852	-0.107457	251.655
0.51856	-0.108932	251.558
0.5186	-0.110398	251.461
0.51864	-0.111856	251.365
0.51868	-0.113302	251.268
0.51872	-0.114736	251.171
0.51876	-0.116155	251.074
0.5188	-0.117559	250.977
0.51884	-0.118945	250.88
0.51888	-0.120312	250.782
0.51892	-0.121658	250.685
0.51896	-0.122981	250.588
0.519	-0.124281	250.49
0.51904	-0.125556	250.393
0.51908	-0.126805	250.295
0.51912	-0.128026	250.198
0.51916	-0.129219	250.1
0.5192	-0.130382	250.003
0.51924	-0.131514	249.905
0.51928	-0.132613	249.807
0.51932	-0.133679	249.709
0.51936	-0.134709	249.611
0.5194	-0.135704	249.513
0.51944	-0.136661	249.415
0.51948	-0.13758	249.317
0.51952	-0.138461	249.219
0.51956	-0.139301	249.121
0.5196	-0.140101	249.023
0.51964	-0.14086	248.925
0.51968	-0.141577	248.826
0.51972	-0.142251	248.728
0.51976	-0.142881	248.63
0.5198	-0.143469	248.531
0.51984	-0.144013	248.433
0.51988	-0.144512	248.334
0.51992	-0.144967	248.236
0.51996	-0.145378	248.137
0.52	-0.145744	248.039
0.52004	-0.146064	247.94
0.52008	-0.14634	247.841
0.52012	-0.14657	247.742
0.52016	-0.146754	247.644
0.5202	-0.146893	247.545
0.52024	-0.146985	247.446
0.52028	-0.147031	247.347
0.52032	-0.147032	247.248
0.52036	-0.146988	247.149
0.5204	-0.146898	247.05
0.52044	-0.146764	246.95
0.52048	-0.146585	246.851
0.52052	-0.146363	246.752
0.52056	-0.146096	246.653
0.5206	-0.145786	246.553
0.52064	-0.145433	246.454
0.52068	-0.145037	246.354
0.52072	-0.144599	246.255
0.52076	-0.144117	246.155
0.5208	-0.143594	246.056
0.52084	-0.143029	245.956
0.52088	-0.142422	245.857
0.52092	-0.141775	245.757
0.52096	-0.141088	245.658
0.521	-0.140362	245.558
0.52104	-0.139597	245.458
0.52108	-0.138793	245.359
0.52112	-0.137953	245.259
0.52116	-0.137076	245.159
0.5212	-0.136163	245.059
0.52124	-0.135214	244.959
0.52128	-0.134231	244.859
0.52132	-0.133214	244.759
0.52136	-0.132163	244.659
0.5214	-0.13108	244.559
0.52144	-0.129966	244.459
0.52148	-0.128821	244.359
0.52152	-0.127646	244.259
0.52156	-0.126442	244.159
0.5216	-0.12521	244.059
0.52164	-0.123951	243.959
0.52168	-0.122666	243.859
0.52172	-0.121355	243.758
0.52176	-0.12002	243.658
0.5218	-0.118661	243.558
0.52184	-0.117278	243.458
0.52188	-0.115873	243.357
0.52192	-0.114447	243.257
0.52196	-0.113001	243.157
0.522	-0.111535	243.057
0.52204	-0.110052	242.956
0.52208	-0.108551	242.856
0.52212	-0.107034	242.756
0.52216	-0.105502	242.655
0.5222	-0.103957	242.555
0.52224	-0.102398	242.455
0.52228	-0.100827	242.354
0.52232	-0.0992458	242.254
0.52236	-0.0976541	242.153
0.5224	-0.0960533	242.053
0.52244	-0.0944442	241.952
0.52248	-0.0928274	241.852
0.52252	-0.0912037	241.751
0.52256	-0.0895737	241.651
0.5226	-0.087938	241.55
0.52264	-0.0862971	241.45
0.52268	-0.0846518	241.349
0.52272	-0.0830028	241.249
0.52276	-0.0813508	241.148
0.5228	-0.0796965	241.047
0.52284	-0.0780409	240.947
0.52288	-0.0763846	240.846
0.52292	-0.0747286	240.746
0.52296	-0.0730736	240.645
0.523	-0.0714204	240.544
0.52304	-0.0697698	240.444
0.52308	-0.0681225	240.343
0.52312	-0.0664794	240.243
0.52316	-0.064841	240.142
0.5232	-0.0632081	240.041
0.52324	-0.0615814	239.941
0.52328	-0.0599614	239.84
0.52332	-0.0583487	239.739
0.52336	-0.0567439	239.639
0.5234	-0.0551475	239.538
0.52344	-0.05356	239.438
0.52348	-0.0519818	239.337
0.52352	-0.0504132	239.236
0.52356	-0.0488547	239.136
0.5236	-0.0473065	239.035
0.52364	-0.0457689	238.934
0.52368	-0.0442424	238.834
0.52372	-0.0427273	238.733
0.52376	-0.0412237	238.632
0.5238	-0.039732	238.532
0.52384	-0.0382525	238.431
0.52388	-0.0367853	238.33
0.52392	-0.0353306	238.23
0.52396	-0.0338886	238.129
0.524	-0.0324595	238.029
0.52404	-0.0310433	237.928
0.52408	-0.0296403	237.827
0.52412	-0.0282504	237.727
0.52416	-0.0268738	237.626
0.5242	-0.0255105	237.525
0.52424	-0.0241607	237.425
0.52428	-0.0228244	237.324
0.52432	-0.0215018	237.224
0.52436	-0.0201929	237.123
0.5244	-0.0188978	237.023
0.52444	-0.0176165	236.922
0.52448	-0.016349	236.822
0.52452	-0.0150951	236.721
0.52456	-0.013855	236.62
0.5246	-0.0126285	236.52
0.52464	-0.0114156	236.419
0.52468	-0.0102164	236.319
0.52472	-0.00903095	236.218
0.52476	-0.00785932	236.117
0.5248	-0.00670152	236.017
0.52484	-0.00555761	235.916
0.52488	-0.00442764	235.815
0.52492	-0.00331165	235.715
0.52496	-0.00220967	235.614
0.525	-0.00112166	235.514
0.52504	-4.75599e-05	235.413
0.52508	0.00101271	235.312
0.52512	0.00205924	235.212
0.52516	0.00309209	235.111
0.5252	0.00411134	235.01
0.52524	0.00511702	234.91
0.52528	0.0061092	234.809
0.52532	0.00708797	234.708
0.52536	0.00805344	234.608
0.5254	0.00900577	234.507
0.52544	0.00994516	234.406
0.52548	0.0108719	234.305
0.52552	0.0117862	234.205
0.52556	0.0126884	234.104
0.5256	0.0135788	234.003
0.52564	0.0144578	233.903
0.52568	0.0153256	233.802
0.52572	0.0161827	233.701
0.52576	0.0170294	233.6
0.5258	0.017866	233.5
0.52584	0.0186931	233.399
0.52588	0.0195109	233.298
0.52592	0.0203201	233.197
0.52596	0.0211212	233.096
0.526	0.0219147	232.995
0.52604	0.0227012	232.894
0.52608	0.0234813	232.794
0.52612	0.0242556	232.693
0.52616	0.0250248	232.592
0.5262	0.0257893	232.491
0.52624	0.0265499	232.39
0.52628	0.0273072	232.289
0.52632	0.0280617	232.188
0.52636	0.0288141	232.087
0.5264	0.0295649	231.986
0.52644	0.0303146	231.886
0.52648	0.0310637	231.785
0.52652	0.0318128	231.684
0.52656	0.0325622	231.583
0.5266	0.0333124	231.482
0.52664	0.034064	231.381
0.52668	0.0348172	231.28
0.52672	0.0355726	231.179
0.52676	0.0363305	231.078
0.5268	0.0370913	230.977
0.52684	0.0378553	230.876
0.52688	0.0386229	230.775
0.52692	0.0393944	230.674
0.52696	0.0401702	230.573
0.527	0.0409505	230.472
0.52704	0.0417357	230.371
0.52708	0.042526	230.27
0.52712	0.0433218	230.169
0.52716	0.0441234	230.068
0.5272	0.0449309	229.967
0.52724	0.0457446	229.866
0.52728	0.0465648	229.765
0.52732	0.0473916	229.664
0.52736	0.0482252	229.563
0.5274	0.0490657	229.462
0.52744	0.0499133	229.361
0.52748	0.0507681	229.26
0.52752	0.0516301	229.16
0.52756	0.0524994	229.059
0.5276	0.053376	228.958
0.52764	0.0542599	228.857
0.52768	0.055151	228.756
0.52772	0.0560493	228.655
0.52776	0.0569543	228.554
0.5278	0.0578659	228.453
0.52784	0.0587837	228.352
0.52788	0.0597074	228.251
0.52792	0.0606365	228.15
0.52796	0.0615706	228.049
0.528	0.0625093	227.949
0.52804	0.0634519	227.848
0.52808	0.0643979	227.747
0.52812	0.0653466	227.646
0.52816	0.0662972	227.545
0.5282	0.0672492	227.444
0.52824	0.0682016	227.343
0.52828	0.0691538	227.242
0.52832	0.0701046	227.141
0.52836	0.0710533	227.04
0.5284	0.0719988	226.94
0.52844	0.0729401	226.839
0.52848	0.073876	226.738
0.52852	0.0748054	226.637
0.52856	0.0757273	226.536
0.5286	0.0766405	226.435
0.52864	0.0775435	226.335
0.52868	0.0784351	226.234
0.52872	0.0793139	226.133
0.52876	0.0801783	226.032
0.5288	0.0810268	225.932
0.52884	0.0818578	225.831
0.52888	0.0826699	225.73
0.52892	0.0834615	225.629
0.52896	0.084231	225.529
0.529	0.0849769	225.428
0.52904	0.0856979	225.327
0.52908	0.0863925	225.226
0.52912	0.0870593	225.126
0.52916	0.0876975	225.025
0.5292	0.0883058	224.924
0.52924	0.0888834	224.824
0.52928	0.0894293	224.723
0.52932	0.0899426	224.622
0.52936	0.0904225	224.521
0.5294	0.090868	224.421
0.52944	0.0912785	224.32
0.52948	0.0916533	224.219
0.52952	0.091992	224.119
0.52956	0.0922941	224.018
0.5296	0.0925594	223.918
0.52964	0.0927876	223.817
0.52968	0.0929783	223.716
0.52972	0.0931317	223.616
0.52976	0.0932478	223.515
0.5298	0.0933265	223.415
0.52984	0.0933681	223.314
0.52988	0.0933729	223.214
0.52992	0.0933411	223.113
0.52996	0.0932731	223.013
0.53	0.0931693	222.913
0.53004	0.0930301	222.812
0.53008	0.0928558	222.712
0.53012	0.0926468	222.611
0.53016	0.0924034	222.511
0.5302	0.0921262	222.411
0.53024	0.0918156	222.31
0.53028	0.091472	222.21
0.53032	0.0910958	222.109
0.53036	0.0906873	222.009
0.5304	0.0902469	221.909
0.53044	0.0897748	221.808
0.53048	0.0892713	221.708
0.53052	0.0887366	221.608
0.53056	0.0881708	221.508
0.5306	0.087574	221.407
0.53064	0.0869463	221.307
0.53068	0.0862879	221.207
0.53072	0.0855985	221.107
0.53076	0.0848783	221.006
0.5308	0.0841271	220.906
0.53084	0.0833449	220.806
0.53088	0.0825315	220.706
0.53092	0.0816871	220.606
0.53096	0.0808119	220.506
0.531	0.0799065	220.406
0.53104	0.0789712	220.306
0.53108	0.0780066	220.206
0.53112	0.0770131	220.106
0.53116	0.0759913	220.006
0.5312	0.0749417	219.906
0.53124	0.073865	219.806
0.53128	0.0727618	219.706
0.53132	0.0716328	219.606
0.53136	0.0704789	219.506
0.5314	0.0693007	219.406
0.53144	0.0680993	219.306
0.53148	0.0668754	219.206
0.53152	0.0656299	219.106
0.53156	0.0643638	219.007
0.5316	0.0630779	218.907
0.53164	0.0617731	218.807
0.53168	0.06045	218.707
0.53172	0.0591094	218.607
0.53176	0.0577521	218.507
0.5318	0.0563789	218.408
0.53184	0.0549907	218.308
0.53188	0.0535882	218.208
0.53192	0.0521721	218.109
0.53196	0.0507431	218.009
0.532	0.049302	217.909
0.53204	0.0478497	217.81
0.53208	0.0463868	217.71
0.53212	0.0449144	217.61
0.53216	0.0434333	217.511
0.5322	0.0419443	217.411
0.53224	0.0404482	217.312
0.53228	0.0389458	217.212
0.53232	0.0374378	217.113
0.53236	0.0359252	217.013
0.5324	0.0344085	216.914
0.53244	0.0328887	216.814
0.53248	0.0313663	216.715
0.53252	0.0298423	216.615
0.53256	0.0283172	216.516
0.5326	0.0267918	216.417
0.53264	0.0252671	216.317
0.53268	0.0237439	216.218
0.53272	0.0222231	216.118
0.53276	0.0207057	216.019
0.5328	0.0191926	215.92
0.53284	0.0176847	215.82
0.53288	0.016183	215.721
0.53292	0.0146884	215.622
0.53296	0.0132016	215.523
0.533	0.0117234	215.423
0.53304	0.0102546	215.324
0.53308	0.00879604	215.225
0.53312	0.00734827	215.126
0.53316	0.00591197	215.027
0.5332	0.0044878	214.928
0.53324	0.00307647	214.828
0.53328	0.0016787	214.729
0.53332	0.000295225	214.63
0.53336	-0.0010732	214.531
0.5334	-0.00242586	214.432
0.53344	-0.00376203	214.333
0.53348	-0.00508109	214.234
0.53352	-0.00638248	214.135
0.53356	-0.00766571	214.036
0.5336	-0.0089303	213.936
0.53364	-0.0101757	213.837
0.53368	-0.0114014	213.738
0.53372	-0.0126068	213.639
0.53376	-0.0137911	213.54
0.5338	-0.0149538	213.441
0.53384	-0.0160942	213.342
0.53388	-0.0172116	213.243
0.53392	-0.0183053	213.144
0.53396	-0.0193748	213.045
0.534	-0.0204193	212.946
0.53404	-0.0214382	212.846
0.53408	-0.0224309	212.747
0.53412	-0.0233967	212.648
0.53416	-0.024335	212.549
0.5342	-0.0252451	212.45
0.53424	-0.0261263	212.351
0.53428	-0.0269778	212.252
0.53432	-0.027799	212.153
0.53436	-0.0285891	212.054
0.5344	-0.0293473	211.955
0.53444	-0.0300732	211.855
0.53448	-0.0307661	211.756
0.53452	-0.0314259	211.657
0.53456	-0.0320525	211.558
0.5346	-0.032646	211.459
0.53464	-0.0332068	211.36
0.53468	-0.0337353	211.26
0.53472	-0.0342324	211.161
0.53476	-0.0346989	211.062
0.5348	-0.0351358	210.962
0.53484	-0.0355442	210.863
0.53488	-0.0359256	210.764
0.53492	-0.0362813	210.664
0.53496	-0.036613	210.565
0.535	-0.0369223	210.465
0.53504	-0.037211	210.366
0.53508	-0.0374809	210.267
0.53512	-0.0377338	210.167
0.53516	-0.0379714	210.068
0.5352	-0.0381953	209.968
0.53524	-0.0384069	209.869
0.53528	-0.0386078	209.769
0.53532	-0.0387993	209.669
0.53536	-0.0389827	209.57
0.5354	-0.0391594	209.47
0.53544	-0.0393307	209.37
0.53548	-0.0394981	209.271
0.53552	-0.0396631	209.171
0.53556	-0.0398271	209.071
0.5356	-0.0399918	208.971
0.53564	-0.0401585	208.872
0.53568	-0.0403285	208.772
0.53572	-0.0405031	208.672
0.53576	-0.0406833	208.572
0.5358	-0.0408698	208.472
0.53584	-0.0410636	208.372
0.53588	-0.0412652	208.272
0.53592	-0.0414754	208.171
0.53596	-0.0416949	208.071
0.536	-0.0419244	207.971
0.53604	-0.0421649	207.871
0.53608	-0.0424172	207.77
0.53612	-0.0426824	207.67
0.53616	-0.0429614	207.57
0.5362	-0.0432553	207.469
0.53624	-0.0435649	207.369
0.53628	-0.043891	207.268
0.53632	-0.0442342	207.168
0.53636	-0.044595	207.067
0.5364	-0.044974	206.966
0.53644	-0.0453716	206.865
0.53648	-0.0457885	206.765
0.53652	-0.0462252	206.664
0.53656	-0.0466824	206.563
0.5366	-0.0471609	206.462
0.53664	-0.0476611	206.361
0.53668	-0.0481838	206.26
0.53672	-0.0487295	206.159
0.53676	-0.0492988	206.058
0.5368	-0.049892	205.956
0.53684	-0.0505096	205.855
0.53688	-0.0511518	205.754
0.53692	-0.0518192	205.652
0.53696	-0.0525118	205.551
0.537	-0.0532301	205.449
0.53704	-0.0539743	205.348
0.53708	-0.0547447	205.246
0.53712	-0.0555418	205.144
0.53716	-0.0563657	205.042
0.5372	-0.0572167	204.94
0.53724	-0.058095	204.838
0.53728	-0.0590006	204.736
0.53732	-0.0599335	204.634
0.53736	-0.0608934	204.532
0.5374	-0.0618802	204.43
0.53744	-0.0628936	204.328
0.53748	-0.0639333	204.225
0.53752	-0.0649989	204.123
0.53756	-0.0660901	204.021
0.5376	-0.0672063	203.918
0.53764	-0.0683472	203.815
0.53768	-0.0695122	203.713
0.53772	-0.0707005	203.61
0.53776	-0.0719116	203.507
0.5378	-0.0731448	203.405
0.53784	-0.0743991	203.302
0.53788	-0.0756738	203.199
0.53792	-0.0769678	203.096
0.53796	-0.0782802	202.993
0.538	-0.07961	202.89
0.53804	-0.080956	202.786
0.53808	-0.0823173	202.683
0.53812	-0.0836928	202.58
0.53816	-0.0850813	202.477
0.5382	-0.0864818	202.373
0.53824	-0.0878929	202.27
0.53828	-0.0893136	202.166
0.53832	-0.0907423	202.062
0.53836	-0.0921777	201.959
0.5384	-0.0936183	201.855
0.53844	-0.0950627	201.751
0.53848	-0.0965093	201.647
0.53852	-0.0979567	201.543
0.53856	-0.0994034	201.44
0.5386	-0.100848	201.336
0.53864	-0.102289	201.232
0.53868	-0.103725	201.127
0.53872	-0.105154	201.023
0.53876	-0.106574	200.919
0.5388	-0.107984	200.815
0.53884	-0.109383	200.711
0.53888	-0.110767	200.606
0.53892	-0.112136	200.502
0.53896	-0.113486	200.398
0.539	-0.114818	200.293
0.53904	-0.116128	200.189
0.53908	-0.117416	200.084
0.53912	-0.118681	199.979
0.53916	-0.11992	199.875
0.5392	-0.121133	199.77
0.53924	-0.122319	199.665
0.53928	-0.123475	199.56
0.53932	-0.124602	199.455
0.53936	-0.125697	199.35
0.5394	-0.126759	199.245
0.53944	-0.127787	199.14
0.53948	-0.128779	199.035
0.53952	-0.129736	198.93
0.53956	-0.130656	198.825
0.5396	-0.131537	198.719
0.53964	-0.132379	198.614
0.53968	-0.133181	198.509
0.53972	-0.133942	198.403
0.53976	-0.134662	198.298
0.5398	-0.13534	198.193
0.53984	-0.135975	198.087
0.53988	-0.136567	197.982
0.53992	-0.137115	197.876
0.53996	-0.137619	197.77
0.54	-0.138079	197.665
0.54004	-0.138493	197.559
0.54008	-0.138862	197.453
0.54012	-0.139186	197.348
0.54016	-0.139464	197.242
0.5402	-0.139697	197.136
0.54024	-0.139884	197.03
0.54028	-0.140025	196.924
0.54032	-0.14012	196.818
0.54036	-0.140169	196.712
0.5404	-0.140172	196.606
0.54044	-0.140129	196.5
0.54048	-0.140039	196.393
0.54052	-0.139904	196.287
0.54056	-0.139722	196.181
0.5406	-0.139495	196.075
0.54064	-0.139223	195.968
0.54068	-0.138906	195.862
0.54072	-0.138544	195.756
0.54076	-0.138138	195.649
0.5408	-0.137689	195.543
0.54084	-0.137196	195.436
0.54088	-0.136661	195.33
0.54092	-0.136083	195.223
0.54096	-0.135462	195.117
0.541	-0.1348	195.01
0.54104	-0.134097	194.903
0.54108	-0.133353	194.797
0.54112	-0.132569	194.69
0.54116	-0.131746	194.583
0.5412	-0.130883	194.476
0.54124	-0.129981	194.369
0.54128	-0.129042	194.262
0.54132	-0.128065	194.156
0.54136	-0.127052	194.049
0.5414	-0.126002	193.942
0.54144	-0.124916	193.834
0.54148	-0.123795	193.727
0.54152	-0.122638	193.62
0.54156	-0.121448	193.513
0.5416	-0.120225	193.406
0.54164	-0.118969	193.298
0.54168	-0.117682	193.191
0.54172	-0.116365	193.084
0.54176	-0.115019	192.976
0.5418	-0.113646	192.869
0.54184	-0.112246	192.762
0.54188	-0.11082	192.654
0.54192	-0.109371	192.547
0.54196	-0.107897	192.439
0.542	-0.106401	192.331
0.54204	-0.104884	192.224
0.54208	-0.103347	192.116
0.54212	-0.101791	192.008
0.54216	-0.100218	191.901
0.5422	-0.0986282	191.793
0.54224	-0.0970237	191.685
0.54228	-0.0954054	191.577
0.54232	-0.0937746	191.47
0.54236	-0.0921323	191.362
0.5424	-0.0904795	191.254
0.54244	-0.0888171	191.146
0.54248	-0.0871461	191.038
0.54252	-0.0854674	190.93
0.54256	-0.0837819	190.822
0.5426	-0.0820905	190.714
0.54264	-0.080394	190.605
0.54268	-0.0786933	190.497
0.54272	-0.0769896	190.389
0.54276	-0.0752835	190.281
0.5428	-0.0735761	190.172
0.54284	-0.0718679	190.064
0.54288	-0.0701597	189.956
0.54292	-0.068452	189.848
0.54296	-0.0667454	189.739
0.543	-0.0650406	189.631
0.54304	-0.0633381	189.523
0.54308	-0.0616385	189.414
0.54312	-0.0599423	189.306
0.54316	-0.0582502	189.197
0.5432	-0.0565628	189.089
0.54324	-0.0548807	188.98
0.54328	-0.0532048	188.872
0.54332	-0.0515355	188.763
0.54336	-0.0498736	188.655
0.5434	-0.0482195	188.546
0.54344	-0.0465739	188.438
0.54348	-0.0449373	188.329
0.54352	-0.04331	188.221
0.54356	-0.0416926	188.112
0.5436	-0.0400855	188.004
0.54364	-0.0384891	187.895
0.54368	-0.036904	187.786
0.54372	-0.0353304	187.678
0.54376	-0.0337689	187.569
0.5438	-0.0322198	187.46
0.54384	-0.0306834	187.352
0.54388	-0.0291599	187.243
0.54392	-0.0276496	187.134
0.54396	-0.0261526	187.025
0.544	-0.0246692	186.917
0.54404	-0.0231996	186.808
0.54408	-0.021744	186.699
0.54412	-0.0203028	186.59
0.54416	-0.0188763	186.482
0.5442	-0.0174647	186.373
0.54424	-0.0160683	186.264
0.54428	-0.0146873	186.156
0.54432	-0.0133218	186.047
0.54436	-0.0119719	185.938
0.5444	-0.0106376	185.829
0.54444	-0.00931874	185.721
0.54448	-0.00801525	185.612
0.54452	-0.00672707	185.503
0.54456	-0.00545415	185.394
0.5446	-0.00419649	185.286
0.54464	-0.00295411	185.177
0.54468	-0.00172706	185.068
0.54472	-0.000515419	184.959
0.54476	0.000680727	184.85
0.5448	0.00186134	184.741
0.54484	0.00302642	184.633
0.54488	0.00417597	184.524
0.54492	0.00531002	184.415
0.54496	0.00642871	184.306
0.545	0.00753217	184.197
0.54504	0.00862059	184.088
0.54508	0.00969414	183.979
0.54512	0.010753	183.87
0.54516	0.0117972	183.761
0.5452	0.0128271	183.653
0.54524	0.0138427	183.544
0.54528	0.0148442	183.435
0.54532	0.015832	183.326
0.54536	0.0168064	183.217
0.5454	0.0177677	183.108
0.54544	0.0187164	182.999
0.54548	0.0196529	182.89
0.54552	0.0205779	182.781
0.54556	0.0214917	182.672
0.5456	0.0223947	182.563
0.54564	0.0232873	182.454
0.54568	0.0241699	182.345
0.54572	0.0250431	182.236
0.54576	0.0259072	182.127
0.5458	0.0267628	182.018
0.54584	0.0276105	181.909
0.54588	0.0284509	181.8
0.54592	0.0292845	181.691
0.54596	0.030112	181.582
0.546	0.0309341	181.473
0.54604	0.0317511	181.364
0.54608	0.0325637	181.255
0.54612	0.0333722	181.146
0.54616	0.0341772	181.036
0.5462	0.034979	180.927
0.54624	0.0357782	180.818
0.54628	0.0365751	180.709
0.54632	0.0373703	180.6
0.54636	0.0381643	180.491
0.5464	0.0389575	180.381
0.54644	0.0397504	180.272
0.54648	0.0405434	180.163
0.54652	0.041337	180.054
0.54656	0.0421314	179.945
0.5466	0.0429271	179.835
0.54664	0.0437244	179.726
0.54668	0.0445235	179.617
0.54672	0.0453247	179.507
0.54676	0.0461284	179.398
0.5468	0.046935	179.289
0.54684	0.0477449	179.179
0.54688	0.0485585	179.07
0.54692	0.0493764	178.961
0.54696	0.0501989	178.851
0.547	0.0510265	178.742
0.54704	0.0518596	178.632
0.54708	0.0526984	178.523
0.54712	0.0535432	178.413
0.54716	0.0543939	178.304
0.5472	0.0552508	178.194
0.54724	0.0561137	178.085
0.54728	0.0569827	177.975
0.54732	0.0578577	177.866
0.54736	0.0587387	177.756
0.5474	0.0596257	177.646
0.54744	0.0605184	177.537
0.54748	0.0614169	177.427
0.54752	0.0623209	177.317
0.54756	0.0632302	177.208
0.5476	0.0641445	177.098
0.54764	0.0650634	176.988
0.54768	0.0659864	176.879
0.54772	0.0669132	176.769
0.54776	0.067843	176.659
0.5478	0.0687756	176.549
0.54784	0.0697104	176.439
0.54788	0.0706471	176.329
0.54792	0.0715853	176.22
0.54796	0.0725246	176.11
0.548	0.0734645	176
0.54804	0.0744045	175.89
0.54808	0.0753442	175.779
0.54812	0.0762829	175.669
0.54816	0.0772201	175.559
0.5482	0.0781552	175.449
0.54824	0.0790874	175.339
0.54828	0.0800162	175.229
0.54832	0.0809408	175.118
0.54836	0.0818604	175.008
0.5484	0.0827743	174.897
0.54844	0.0836816	174.787
0.54848	0.0845814	174.677
0.54852	0.0854728	174.566
0.54856	0.0863547	174.456
0.5486	0.087226	174.345
0.54864	0.0880853	174.234
0.54868	0.0889316	174.124
0.54872	0.0897633	174.013
0.54876	0.0905789	173.902
0.5488	0.091377	173.791
0.54884	0.0921562	173.681
0.54888	0.092915	173.57
0.54892	0.0936521	173.459
0.54896	0.0943661	173.348
0.549	0.0950558	173.237
0.54904	0.0957199	173.126
0.54908	0.0963573	173.014
0.54912	0.0969667	172.903
0.54916	0.0975471	172.792
0.5492	0.0980974	172.681
0.54924	0.0986167	172.569
0.54928	0.0991041	172.458
0.54932	0.0995589	172.346
0.54936	0.0999803	172.235
0.5494	0.100368	172.123
0.54944	0.10072	172.011
0.54948	0.101038	171.899
0.54952	0.10132	171.788
0.54956	0.101565	171.676
0.5496	0.101774	171.564
0.54964	0.101947	171.452
0.54968	0.102082	171.34
0.54972	0.102181	171.228
0.54976	0.102244	171.116
0.5498	0.102271	171.004
0.54984	0.102262	170.892
0.54988	0.102219	170.779
0.54992	0.10214	170.667
0.54996	0.102028	170.555
0.55	0.101881	170.443
0.55004	0.101702	170.33
0.55008	0.101489	170.218
0.55012	0.101243	170.105
0.55016	0.100966	169.993
0.5502	0.100656	169.881
0.55024	0.100315	169.768
0.55028	0.0999437	169.655
0.55032	0.0995414	169.543
0.55036	0.0991091	169.43
0.5504	0.0986472	169.317
0.55044	0.0981564	169.205
0.55048	0.0976373	169.092
0.55052	0.0970907	168.979
0.55056	0.096517	168.866
0.5506	0.0959171	168.754
0.55064	0.0952914	168.641
0.55068	0.0946406	168.528
0.55072	0.0939654	168.415
0.55076	0.0932661	168.302
0.5508	0.0925434	168.19
0.55084	0.0917977	168.077
0.55088	0.0910297	167.964
0.55092	0.0902398	167.851
0.55096	0.0894287	167.738
0.551	0.0885968	167.625
0.55104	0.0877447	167.513
0.55108	0.0868728	167.4
0.55112	0.0859817	167.287
0.55116	0.0850718	167.174
0.5512	0.0841433	167.061
0.55124	0.0831967	166.948
0.55128	0.0822325	166.836
0.55132	0.0812509	166.723
0.55136	0.0802526	166.61
0.5514	0.0792379	166.497
0.55144	0.0782074	166.384
0.55148	0.0771614	166.272
0.55152	0.0761004	166.159
0.55156	0.075025	166.046
0.5516	0.0739356	165.933
0.55164	0.0728329	165.82
0.55168	0.0717176	165.708
0.55172	0.0705903	165.595
0.55176	0.0694519	165.482
0.5518	0.0683029	165.369
0.55184	0.0671441	165.257
0.55188	0.0659761	165.144
0.55192	0.0647994	165.031
0.55196	0.0636145	164.919
0.552	0.062422	164.806
0.55204	0.0612224	164.694
0.55208	0.0600166	164.581
0.55212	0.0588051	164.469
0.55216	0.0575891	164.356
0.5522	0.0563692	164.244
0.55224	0.0551465	164.131
0.55228	0.0539216	164.019
0.55232	0.0526953	163.907
0.55236	0.0514682	163.794
0.5524	0.0502412	163.682
0.55244	0.0490148	163.57
0.55248	0.0477898	163.457
0.55252	0.0465667	163.345
0.55256	0.0453463	163.233
0.5526	0.0441291	163.121
0.55264	0.0429159	163.008
0.55268	0.0417073	162.896
0.55272	0.0405041	162.784
0.55276	0.0393066	162.672
0.5528	0.0381156	162.56
0.55284	0.0369315	162.448
0.55288	0.0357549	162.335
0.55292	0.0345861	162.223
0.55296	0.0334255	162.111
0.553	0.0322739	161.999
0.55304	0.0311316	161.888
0.55308	0.0299994	161.776
0.55312	0.028878	161.664
0.55316	0.0277681	161.552
0.5532	0.0266705	161.44
0.55324	0.0255856	161.328
0.55328	0.024514	161.217
0.55332	0.0234558	161.105
0.55336	0.0224112	160.993
0.5534	0.0213802	160.882
0.55344	0.0203627	160.77
0.55348	0.0193587	160.658
0.55352	0.0183681	160.547
0.55356	0.017391	160.435
0.5536	0.0164272	160.324
0.55364	0.015477	160.212
0.55368	0.0145403	160.101
0.55372	0.0136172	159.99
0.55376	0.0127074	159.878
0.5538	0.0118108	159.767
0.55384	0.010927	159.655
0.55388	0.0100557	159.544
0.55392	0.00919645	159.433
0.55396	0.00834903	159.322
0.554	0.00751314	159.21
0.55404	0.00668859	159.099
0.55408	0.00587528	158.988
0.55412	0.00507323	158.877
0.55416	0.00428246	158.766
0.5542	0.00350305	158.655
0.55424	0.002735	158.544
0.55428	0.00197824	158.433
0.55432	0.0012326	158.322
0.55436	0.000497812	158.211
0.5544	-0.000226447	158.1
0.55444	-0.00094052	157.989
0.55448	-0.00164472	157.878
0.55452	-0.00233929	157.767
0.55456	-0.00302441	157.656
0.5546	-0.00370018	157.546
0.55464	-0.00436677	157.435
0.55468	-0.00502435	157.324
0.55472	-0.00567317	157.213
0.55476	-0.00631357	157.103
0.5548	-0.00694604	156.992
0.55484	-0.00757115	156.881
0.55488	-0.00818958	156.77
0.55492	-0.00880199	156.66
0.55496	-0.00940901	156.549
0.555	-0.0100111	156.439
0.55504	-0.0106088	156.328
0.55508	-0.0112025	156.217
0.55512	-0.0117924	156.107
0.55516	-0.0123788	155.996
0.5552	-0.0129622	155.886
0.55524	-0.0135429	155.775
0.55528	-0.0141214	155.665
0.55532	-0.0146985	155.555
0.55536	-0.0152749	155.444
0.5554	-0.0158512	155.334
0.55544	-0.0164283	155.223
0.55548	-0.017007	155.113
0.55552	-0.0175879	155.003
0.55556	-0.0181714	154.892
0.5556	-0.0187581	154.782
0.55564	-0.0193483	154.672
0.55568	-0.0199423	154.561
0.55572	-0.0205404	154.451
0.55576	-0.021143	154.341
0.5558	-0.0217506	154.231
0.55584	-0.0223638	154.12
0.55588	-0.0229833	154.01
0.55592	-0.0236098	153.9
0.55596	-0.0242438	153.789
0.556	-0.024886	153.679
0.55604	-0.0255371	153.569
0.55608	-0.0261976	153.459
0.55612	-0.026868	153.348
0.55616	-0.0275486	153.238
0.5562	-0.0282401	153.128
0.55624	-0.028943	153.017
0.55628	-0.0296579	152.907
0.55632	-0.0303856	152.797
0.55636	-0.0311268	152.687
0.5564	-0.0318824	152.576
0.55644	-0.0326532	152.466
0.55648	-0.0334399	152.356
0.55652	-0.0342432	152.246
0.55656	-0.0350636	152.135
0.5566	-0.0359015	152.025
0.55664	-0.0367572	151.915
0.55668	-0.0376311	151.804
0.55672	-0.0385236	151.694
0.55676	-0.0394352	151.584
0.5568	-0.0403663	151.474
0.55684	-0.0413175	151.363
0.55688	-0.0422892	151.253
0.55692	-0.0432821	151.143
0.55696	-0.0442965	151.032
0.557	-0.0453325	150.922
0.55704	-0.0463905	150.811
0.55708	-0.0474705	150.701
0.55712	-0.0485725	150.59
0.55716	-0.0496966	150.48
0.5572	-0.0508428	150.369
0.55724	-0.052011	150.259
0.55728	-0.0532013	150.148
0.55732	-0.0544136	150.038
0.55736	-0.0556478	149.927
0.5574	-0.0569038	149.816
0.55744	-0.0581813	149.706
0.55748	-0.0594798	149.595
0.55752	-0.0607989	149.484
0.55756	-0.062138	149.374
0.5576	-0.0634964	149.263
0.55764	-0.0648733	149.152
0.55768	-0.0662681	149.041
0.55772	-0.0676801	148.931
0.55776	-0.0691086	148.82
0.5578	-0.0705533	148.709
0.55784	-0.0720134	148.598
0.55788	-0.0734885	148.487
0.55792	-0.0749778	148.376
0.55796	-0.0764805	148.265
0.558	-0.0779959	148.154
0.55804	-0.0795228	148.043
0.55808	-0.0810601	147.932
0.55812	-0.0826069	147.82
0.55816	-0.084162	147.709
0.5582	-0.0857244	147.598
0.55824	-0.0872929	147.487
0.55828	-0.0888666	147.375
0.55832	-0.0904443	147.264
0.55836	-0.0920247	147.152
0.5584	-0.0936067	147.041
0.55844	-0.0951886	146.93
0.55848	-0.0967689	146.818
0.55852	-0.0983458	146.706
0.55856	-0.0999175	146.595
0.5586	-0.101482	146.483
0.55864	-0.103038	146.372
0.55868	-0.104582	146.26
0.55872	-0.106114	146.148
0.55876	-0.107631	146.036
0.5588	-0.109132	145.925
0.55884	-0.110614	145.813
0.55888	-0.112076	145.701
0.55892	-0.113515	145.589
0.55896	-0.114932	145.477
0.559	-0.116323	145.365
0.55904	-0.117687	145.253
0.55908	-0.119023	145.141
0.55912	-0.12033	145.029
0.55916	-0.121607	144.917
0.5592	-0.122851	144.805
0.55924	-0.124061	144.692
0.55928	-0.125238	144.58
0.55932	-0.126378	144.468
0.55936	-0.127482	144.355
0.5594	-0.128547	144.243
0.55944	-0.129575	144.13
0.55948	-0.130562	144.018
0.55952	-0.131509	143.905
0.55956	-0.132414	143.793
0.5596	-0.133277	143.68
0.55964	-0.134097	143.567
0.55968	-0.134873	143.455
0.55972	-0.135605	143.342
0.55976	-0.13629	143.229
0.5598	-0.13693	143.116
0.55984	-0.137522	143.004
0.55988	-0.138068	142.891
0.55992	-0.138565	142.778
0.55996	-0.139016	142.665
0.56	-0.139418	142.552
0.56004	-0.139773	142.439
0.56008	-0.14008	142.326
0.56012	-0.140339	142.213
0.56016	-0.140551	142.1
0.5602	-0.140714	141.986
0.56024	-0.14083	141.873
0.56028	-0.140898	141.76
0.56032	-0.140919	141.647
0.56036	-0.140891	141.533
0.5604	-0.140817	141.42
0.56044	-0.140696	141.307
0.56048	-0.140528	141.193
0.56052	-0.140315	141.08
0.56056	-0.140056	140.966
0.5606	-0.139753	140.853
0.56064	-0.139406	140.739
0.56068	-0.139016	140.626
0.56072	-0.138582	140.512
0.56076	-0.138106	140.398
0.5608	-0.137588	140.285
0.56084	-0.137028	140.171
0.56088	-0.136427	140.057
0.56092	-0.135785	139.944
0.56096	-0.135105	139.83
0.561	-0.134385	139.716
0.56104	-0.133629	139.602
0.56108	-0.132835	139.489
0.56112	-0.132005	139.375
0.56116	-0.13114	139.261
0.5612	-0.13024	139.147
0.56124	-0.129306	139.033
0.56128	-0.128338	138.919
0.56132	-0.127337	138.805
0.56136	-0.126304	138.692
0.5614	-0.125239	138.578
0.56144	-0.124144	138.464
0.56148	-0.12302	138.35
0.56152	-0.121867	138.236
0.56156	-0.120686	138.122
0.5616	-0.119478	138.008
0.56164	-0.118245	137.893
0.56168	-0.116987	137.779
0.56172	-0.115706	137.665
0.56176	-0.114401	137.551
0.5618	-0.113074	137.437
0.56184	-0.111726	137.323
0.56188	-0.110358	137.209
0.56192	-0.108971	137.095
0.56196	-0.107566	136.981
0.562	-0.106143	136.867
0.56204	-0.104705	136.752
0.56208	-0.103253	136.638
0.56212	-0.101786	136.524
0.56216	-0.100307	136.41
0.5622	-0.0988167	136.296
0.56224	-0.0973153	136.182
0.56228	-0.0958042	136.068
0.56232	-0.0942842	135.953
0.56236	-0.0927563	135.839
0.5624	-0.0912215	135.725
0.56244	-0.0896809	135.611
0.56248	-0.0881353	135.497
0.56252	-0.086586	135.382
0.56256	-0.0850337	135.268
0.5626	-0.0834794	135.154
0.56264	-0.0819239	135.039
0.56268	-0.0803679	134.925
0.56272	-0.0788119	134.811
0.56276	-0.0772565	134.696
0.5628	-0.0757021	134.582
0.56284	-0.0741489	134.468
0.56288	-0.0725974	134.353
0.56292	-0.0710483	134.239
0.56296	-0.0695023	134.125
0.563	-0.0679602	134.01
0.56304	-0.0664229	133.896
0.56308	-0.0648913	133.782
0.56312	-0.0633659	133.667
0.56316	-0.0618473	133.553
0.5632	-0.0603357	133.438
0.56324	-0.0588312	133.324
0.56328	-0.0573339	133.209
0.56332	-0.0558438	133.095
0.56336	-0.0543608	132.98
0.5634	-0.0528849	132.866
0.56344	-0.0514164	132.751
0.56348	-0.0499553	132.637
0.56352	-0.048502	132.522
0.56356	-0.0470569	132.408
0.5636	-0.0456204	132.293
0.56364	-0.044193	132.179
0.56368	-0.0427751	132.064
0.56372	-0.0413669	131.949
0.56376	-0.0399687	131.835
0.5638	-0.0385806	131.72
0.56384	-0.0372028	131.605
0.56388	-0.0358352	131.49
0.56392	-0.0344779	131.376
0.56396	-0.0331309	131.261
0.564	-0.0317941	131.146
0.56404	-0.0304677	131.031
0.56408	-0.0291515	130.916
0.56412	-0.0278458	130.802
0.56416	-0.0265507	130.687
0.5642	-0.0252664	130.572
0.56424	-0.0239931	130.457
0.56428	-0.0227312	130.342
0.56432	-0.0214806	130.228
0.56436	-0.0202413	130.113
0.5644	-0.0190134	129.998
0.56444	-0.0177967	129.883
0.56448	-0.016591	129.768
0.56452	-0.0153961	129.653
0.56456	-0.0142118	129.538
0.5646	-0.0130381	129.423
0.56464	-0.0118749	129.308
0.56468	-0.0107221	129.193
0.56472	-0.00957976	129.078
0.56476	-0.00844802	128.963
0.5648	-0.00732696	128.848
0.56484	-0.00621668	128.733
0.56488	-0.00511718	128.618
0.56492	-0.00402836	128.503
0.56496	-0.00294998	128.388
0.565	-0.00188177	128.273
0.56504	-0.0008234	128.158
0.56508	0.000225402	128.043
0.56512	0.00126484	127.928
0.56516	0.00229499	127.812
0.5652	0.00331584	127.697
0.56524	0.00432728	127.582
0.56528	0.00532918	127.467
0.56532	0.00632136	127.352
0.56536	0.00730367	127.237
0.5654	0.00827596	127.122
0.56544	0.00923808	127.007
0.56548	0.0101899	126.892
0.56552	0.0111313	126.777
0.56556	0.0120621	126.662
0.5656	0.0129824	126.546
0.56564	0.013892	126.431
0.56568	0.0147909	126.316
0.56572	0.0156791	126.201
0.56576	0.0165566	126.086
0.5658	0.0174235	125.971
0.56584	0.0182799	125.856
0.56588	0.0191259	125.741
0.56592	0.019962	125.625
0.56596	0.0207883	125.51
0.566	0.0216054	125.395
0.56604	0.0224138	125.28
0.56608	0.0232137	125.165
0.56612	0.0240056	125.05
0.56616	0.0247898	124.935
0.5662	0.0255668	124.82
0.56624	0.0263368	124.705
0.56628	0.0271001	124.59
0.56632	0.0278571	124.475
0.56636	0.028608	124.36
0.5664	0.0293533	124.245
0.56644	0.0300932	124.13
0.56648	0.0308283	124.015
0.56652	0.0315589	123.9
0.56656	0.0322854	123.785
0.5666	0.0330085	123.67
0.56664	0.0337284	123.555
0.56668	0.0344456	123.441
0.56672	0.0351604	123.326
0.56676	0.0358731	123.211
0.5668	0.0365837	123.096
0.56684	0.0372926	122.982
0.56688	0.038	122.867
0.56692	0.038706	122.752
0.56696	0.0394109	122.637
0.567	0.0401151	122.523
0.56704	0.0408187	122.408
0.56708	0.0415219	122.293
0.56712	0.042225	122.179
0.56716	0.0429279	122.064
0.5672	0.0436309	121.949
0.56724	0.044334	121.835
0.56728	0.0450372	121.72
0.56732	0.0457408	121.606
0.56736	0.0464447	121.491
0.5674	0.0471491	121.377
0.56744	0.0478542	121.262
0.56748	0.0485601	121.148
0.56752	0.0492668	121.034
0.56756	0.0499744	120.919
0.5676	0.050683	120.805
0.56764	0.0513927	120.691
0.56768	0.0521035	120.576
0.56772	0.0528155	120.462
0.56776	0.0535288	120.348
0.5678	0.0542432	120.234
0.56784	0.0549587	120.12
0.56788	0.0556752	120.005
0.56792	0.0563926	119.891
0.56796	0.0571107	119.777
0.568	0.0578292	119.663
0.56804	0.0585476	119.549
0.56808	0.0592657	119.435
0.56812	0.0599828	119.321
0.56816	0.0606984	119.207
0.5682	0.0614119	119.093
0.56824	0.0621229	118.978
0.56828	0.0628308	118.864
0.56832	0.0635347	118.75
0.56836	0.0642341	118.636
0.5684	0.0649278	118.522
0.56844	0.065615	118.408
0.56848	0.0662946	118.294
0.56852	0.0669655	118.18
0.56856	0.0676266	118.067
0.5686	0.0682768	117.953
0.56864	0.0689149	117.839
0.56868	0.0695398	117.725
0.56872	0.0701502	117.611
0.56876	0.0707447	117.497
0.5688	0.0713221	117.383
0.56884	0.071881	117.269
0.56888	0.0724204	117.155
0.56892	0.0729392	117.041
0.56896	0.0734363	116.928
0.569	0.0739107	116.814
0.56904	0.0743616	116.7
0.56908	0.0747882	116.586
0.56912	0.0751896	116.472
0.56916	0.0755653	116.358
0.5692	0.0759145	116.244
0.56924	0.0762366	116.13
0.56928	0.0765311	116.016
0.56932	0.0767974	115.902
0.56936	0.077035	115.788
0.5694	0.0772434	115.674
0.56944	0.0774222	115.56
0.56948	0.0775709	115.446
0.56952	0.0776896	115.332
0.56956	0.0777782	115.218
0.5696	0.0778367	115.104
0.56964	0.0778653	114.99
0.56968	0.0778642	114.876
0.56972	0.0778336	114.762
0.56976	0.077774	114.648
0.5698	0.0776858	114.534
0.56984	0.0775696	114.419
0.56988	0.0774262	114.305
0.56992	0.0772564	114.191
0.56996	0.077061	114.077
0.57	0.076841	113.963
0.57004	0.0765972	113.849
0.57008	0.0763306	113.735
0.57012	0.0760419	113.62
0.57016	0.0757322	113.506
0.5702	0.0754024	113.392
0.57024	0.0750533	113.277
0.57028	0.0746858	113.163
0.57032	0.074301	113.049
0.57036	0.0738999	112.934
0.5704	0.0734833	112.82
0.57044	0.0730524	112.706
0.57048	0.0726081	112.591
0.57052	0.0721512	112.477
0.57056	0.0716828	112.362
0.5706	0.0712036	112.248
0.57064	0.0707142	112.133
0.57068	0.0702154	112.018
0.57072	0.0697078	111.904
0.57076	0.0691918	111.789
0.5708	0.068668	111.675
0.57084	0.0681367	111.56
0.57088	0.0675982	111.445
0.57092	0.0670527	111.331
0.57096	0.0665001	111.216
0.571	0.0659405	111.101
0.57104	0.0653739	110.986
0.57108	0.0648001	110.872
0.57112	0.0642191	110.757
0.57116	0.0636311	110.642
0.5712	0.0630358	110.527
0.57124	0.0624334	110.412
0.57128	0.0618238	110.297
0.57132	0.0612074	110.182
0.57136	0.060584	110.067
0.5714	0.0599539	109.952
0.57144	0.0593168	109.837
0.57148	0.0586728	109.722
0.57152	0.0580217	109.607
0.57156	0.0573633	109.492
0.5716	0.0566976	109.377
0.57164	0.0560246	109.261
0.57168	0.0553444	109.146
0.57172	0.054657	109.031
0.57176	0.0539627	108.916
0.5718	0.0532618	108.8
0.57184	0.0525546	108.685
0.57188	0.0518413	108.57
0.57192	0.0511223	108.455
0.57196	0.0503978	108.339
0.572	0.0496679	108.224
0.57204	0.048933	108.108
0.57208	0.0481932	107.993
0.57212	0.047449	107.878
0.57216	0.0467009	107.762
0.5722	0.0459494	107.647
0.57224	0.045195	107.531
0.57228	0.0444382	107.416
0.57232	0.0436794	107.3
0.57236	0.0429189	107.185
0.5724	0.0421571	107.069
0.57244	0.0413941	106.954
0.57248	0.0406304	106.838
0.57252	0.0398663	106.722
0.57256	0.0391023	106.607
0.5726	0.0383387	106.491
0.57264	0.0375759	106.375
0.57268	0.0368145	106.26
0.57272	0.0360549	106.144
0.57276	0.0352976	106.028
0.5728	0.0345431	105.912
0.57284	0.0337918	105.796
0.57288	0.0330441	105.681
0.57292	0.0323004	105.565
0.57296	0.0315608	105.449
0.573	0.0308256	105.333
0.57304	0.0300949	105.217
0.57308	0.0293689	105.101
0.57312	0.0286478	104.985
0.57316	0.0279318	104.869
0.5732	0.0272209	104.753
0.57324	0.0265153	104.637
0.57328	0.025815	104.521
0.57332	0.02512	104.405
0.57336	0.0244302	104.289
0.5734	0.0237455	104.173
0.57344	0.0230659	104.057
0.57348	0.0223914	103.941
0.57352	0.0217218	103.825
0.57356	0.021057	103.708
0.5736	0.0203973	103.592
0.57364	0.0197425	103.476
0.57368	0.0190928	103.359
0.57372	0.0184483	103.243
0.57376	0.0178088	103.127
0.5738	0.0171744	103.01
0.57384	0.0165448	102.894
0.57388	0.0159199	102.777
0.57392	0.0152994	102.661
0.57396	0.0146831	102.544
[truncated: 23,001 more rows]
