# Supplementary material for: Shear Thickening Fluids in Cork Agglomerates: An Exploration of Advantages and Drawbacks
Source: Preprints.org preprint supplement (doi:10.20944/preprints202304.0004.v1), 2023-04-03
Supplement: Supplementary file 27 [file Isocurves Values.xlsx]

## Sheet: isocurvas valores
					valores da deformação
	PARA 0 A 0.5
	Sample	Densidade energética (MJ/m3)	Densidade energética (kJ/m3)		50 MJ/m^3	0_x		100 MJ/m^3	0_x		150 MJ/m^3	0_x		200 MJ/m^3	0_x		50 MJ/m^3
	0_x	0.217258	217.258			0.214995			0.326442			0.412043			0.479739		0.214995	0.39099
	0_y	0.220048	220.048														0.241287	0.333249
	10_x	0.177367	177.367			10_x			10_x			10_x			10_x		0.318756	0.237708
	10_y	0.165145	165.145			0.241287			0.366832			0.458847			0.530163		0.520992	0.157321
	20_x	0.102963	102.963
	20_y	0.0919231	91.9231			20_x			20_x			20_x			20_x		100 MJ/m^3
	30_x	0.0468443	46.8443			0.318756			0.491963			0.607372			0.690169		0.326442	0.515144
	30_y	0.0287484	28.7484														0.366832	0.473246
						30_x			30_x			30_x			30_x		0.491963	0.364236
						0.520992			0.750358			0.840633			0.879876		0.750358	0.318628
																	150 MJ/m^3
					valores da tensão												0.412043	0.66221
																	0.458847	0.622129
					50 MJ/m^3	0_x		100 MJ/m^3	0_x		150 MJ/m^3	0_x		200 MJ/m^3	0_x		0.607372	0.511478
						0.39099			0.515144			0.66221			0.82287		0.840633	0.950487
						10_x			10_x			10_x			10_x		200 MJ/m^3
						0.333249			0.473246			0.622129			0.7922		0.479739	0.82287
																	0.530163	0.7922
						20_x			20_x			20_x			20_x		0.690169	0.732379
						0.237708			0.364236			0.511478			0.732379		0.879876	1.66239
						30_x			30_x			30_x			30_x
						0.157321			0.318628			0.950487			1.66239
